# Supplementary material for: Loss of CTRP10 results in female obesity with preserved metabolic health
Source: eLife. 2025 Mar 24;13:RP93373. doi: 10.7554/eLife.93373 (PMC11932693; doi:10.7554/eLife.93373)
Supplement: Figure 8—source data 1. [file elife-93373-fig8-data1.xls]

gene_id	KO_gWAT1	KO_gWAT2	KO_gWAT3	KO_gWAT4	KO_gWAT5	KO_gWAT6	WT_gWAT1	WT_gWAT2	WT_gWAT3	WT_gWAT4	WT_gWAT5	WT_gWAT6	KO_gWAT	WT_gWAT	log2FoldChange	pvalue	padj	gene_name	gene_chr	gene_start	gene_end	gene_strand	gene_length	gene_biotype	gene_description	tf_family	KO_gWAT1_count	KO_gWAT2_count	KO_gWAT3_count	KO_gWAT4_count	KO_gWAT5_count	KO_gWAT6_count	WT_gWAT1_count	WT_gWAT2_count	WT_gWAT3_count	WT_gWAT4_count	WT_gWAT5_count	WT_gWAT6_count	KO_gWAT1_fpkm	KO_gWAT2_fpkm	KO_gWAT3_fpkm	KO_gWAT4_fpkm	KO_gWAT5_fpkm	KO_gWAT6_fpkm	WT_gWAT1_fpkm	WT_gWAT2_fpkm	WT_gWAT3_fpkm	WT_gWAT4_fpkm	WT_gWAT5_fpkm
ENSMUSG00000022548	472.135412956429	596.531298383103	760.696920568074	568.916528891555	300.851984167368	327.925476279097	301.670697940587	200.767724213061	238.156383292168	201.754493623545	187.156759106247	177.494342328306	504.509603540938	217.833400083985	1.21113338534407	1.20477785009193e-07	0.000466218908539324	Apod	16	31115010	31133626	-	2577	protein_coding	apolipoprotein D [Source:MGI Symbol;Acc:MGI:88056]	-	510	676	637	549	302	319	312	210	223	213	200	167	6.48908780366488	7.77179863845163	10.392484129844	7.76227979468342	4.1614806641777	4.49136875505766	4.11775361407986	2.75068276715467	3.30989791862992	2.7564587551562	2.54666776182031
ENSMUSG00000020572	2162.56534248278	2019.91145266113	2297.61518865459	2568.93274157043	2173.70539554038	2284.17055890958	1567.33397872337	1507.67000516189	1709.81331681955	1622.5607867471	1552.46531678632	1936.49516001301	2251.15011330315	1649.38976070854	0.448793525576375	5.66296610739412e-07	0.00125224360537648	Nampt	12	32869544	32903348	+	5054	protein_coding	nicotinamide phosphoribosyltransferase [Source:MGI Symbol;Acc:MGI:1929865]	-	2336	2289	1924	2479	2182	2222	1621	1577	1601	1713	1659	1822	15.1553333701218	13.4183716846117	16.0053135410464	17.8719794458821	15.3311546787414	15.9518576676739	10.9085734160219	10.5325149973054	12.116585455583	11.3033828875564	10.7712935516897
ENSMUSG00000033777	668.395623832434	204.726717788284	422.742087725429	313.992182612279	429.361606543495	292.974171597313	100.556899313529	110.900266708167	218.932998093697	176.179980347321	59.890162913999	151.986173370944	388.698731683206	136.407746791276	1.51175700814738	1.37766269288822e-06	0.00213248408232168	Tlr13	X	105186810	105204099	+	4304	protein_coding	toll-like receptor 13 [Source:MGI Symbol;Acc:MGI:3045213]	-	722	232	354	303	431	285	104	116	205	186	64	143	5.50038169371495	1.59700025199458	3.45800291916512	2.56508483418756	3.55598863405483	2.4025644478187	0.8218286139625	0.90974851848898	1.82182120911969	1.44120909846827	0.487937756298211
ENSMUSG00000055320	2478.24804016541	3550.94962232782	3951.56375221312	4255.99304946742	3168.90781998807	3251.49931495544	1770.38156387569	1761.01975238313	2131.65982534155	2546.08487727742	1882.79699660884	2518.93168453943	3442.86026651955	2101.81245000434	0.71193393848278	2.13360827933676e-06	0.00264022128260597	Tead1	7	112278525	112506014	+	13570	protein_coding	TEA domain family member 1 [Source:MGI Symbol;Acc:MGI:101876]	TEA	2677	4024	3309	4107	3181	3163	1831	1842	1996	2688	2012	2370	6.46839327032076	8.78551828207785	10.2520632215803	11.0274785658258	8.32413621089441	8.45710637338069	4.58911222371154	4.58189791288342	5.62606628472639	6.60595681649208	4.86524642530892
ENSMUSG00000033581	225.884393649742	337.975572900486	143.302402618789	120.208228326813	172.34236179124	121.301586836782	62.8480620709555	65.010501173753	105.72861859159	97.5620321278176	52.4038925497492	46.764976421829	186.835757687309	71.7196804892824	1.38359412603783	3.66527130226474e-06	0.0032960444087919	Igf2bp2	16	21877759	21982049	-	7402	protein_coding	insulin-like growth factor 2 mRNA binding protein 2 [Source:MGI Symbol;Acc:MGI:1890358]	-	244	383	120	116	173	118	65	68	99	103	56	44	1.08085799330622	1.53298870726687	0.681595197087671	0.571005479143456	0.829950859524437	0.578409444219712	0.298665086673754	0.310095498890336	0.511576126373929	0.464060343949589	0.248253659851265
ENSMUSG00000025531	564.710984124356	518.876336463409	555.296810147809	549.227250113887	557.871228919622	512.961795182664	420.598569244087	449.33728752447	364.176352926588	412.033825005832	429.524762148837	438.953074141259	543.157400825291	419.103978498512	0.373243693877336	5.22373951632206e-06	0.00425569810384995	Chm	X	111950290	112095214	-	6780	protein_coding	choroidermia (RAB escort protein 1) [Source:MGI Symbol;Acc:MGI:892979]	-	610	588	465	530	560	499	435	470	341	435	459	413	2.9500408799604	2.56943061599519	2.88348446006879	2.84824630633777	2.93301098677847	2.67038143886686	2.18212560160703	2.33993500544323	1.92375091953482	2.13966546334588	2.22146617654485
ENSMUSG00000022788	429.550650219182	432.396947052841	490.810728969354	463.216190190391	402.464243720584	356.708903664097	249.458461758562	243.789379401574	350.292796949915	321.102222245924	194.643029470497	235.950562855592	429.191277302742	265.872742113677	0.691151949889298	6.82586258484827e-06	0.00526638314738274	Fgd4	16	16234781	16418413	-	17517	protein_coding	FYVE, RhoGEF and PH domain containing 4 [Source:MGI Symbol;Acc:MGI:2183747]	-	464	490	411	447	404	347	258	255	328	339	208	222	0.868532639027477	0.828753952182041	0.98645311396284	0.929777773910801	0.818986969199781	0.718740626307647	0.500933593882211	0.491378421558971	0.716206517924407	0.645396018483646	0.389637114522999
ENSMUSG00000026678	12749.5076612469	9684.80917123455	10308.2194950449	10609.4124276716	11368.6186864834	9501.61497569811	6895.88274907777	8380.61843072234	7262.16774164457	6036.53233738429	6501.82581135102	9080.90814882062	10703.6970695633	7359.65586983343	0.540455602951041	7.14477977227454e-06	0.00526638314738274	Rgs5	1	169483070	169523382	+	4546	protein_coding	regulator of G-protein signaling 5 [Source:MGI Symbol;Acc:MGI:1098434]	-	13772	10975	8632	10238	11412	9243	7132	8766	6800	6373	6948	8544	99.3334400020063	71.5260694351579	79.8318799398964	82.057269396882	89.1430908506558	73.7710509604542	53.3583123122938	65.0890099069136	57.2141745533976	46.7520652870451	50.1518654737369
ENSMUSG00000104546	33.3272056204538	68.8305344288196	33.4372272777175	48.7050580289673	27.8935614459811	31.8673660333919	11.602719151561	10.5164046016365	18.1554193541114	18.9440839083141	12.1651893419061	15.9426055983508	40.6768254725552	14.5544036593133	1.4902574040996	8.19562046185336e-06	0.00536263359285352	Gm43858	3	152091897	152093674	+	1778	TEC	predicted gene 43858 [Source:MGI Symbol;Acc:MGI:5663995]	-	36	78	28	47	28	31	12	11	17	20	13	15	0.663893837227992	1.29972690304295	0.662095491974139	0.963157849584644	0.559218630212542	0.632604659060569	0.229545969184992	0.20883176495938	0.365713776040137	0.375132380215018	0.239921025558893
ENSMUSG00000023977	1937.60670454472	2187.57557498774	2247.45934773801	2224.88850187644	2011.32501997985	1866.81086182709	1479.34669182403	1501.93378447009	1444.9577874184	1735.27808600157	1650.7226153171	1763.2521791776	2079.27766849231	1595.91519070146	0.381521846456155	1.0828615020783e-05	0.00598629042523927	Ubr2	17	47239221	47321482	-	9814	protein_coding	ubiquitin protein ligase E3 component n-recognin 2 [Source:MGI Symbol;Acc:MGI:1861099]	-	2093	2479	1882	2147	2019	1816	1530	1571	1353	1832	1764	1659	6.99279936469368	7.48375800259193	8.06246647232051	7.97108348828103	7.30542727882049	6.71385935890926	5.30231541516117	5.403383121437	5.27322009320742	6.22537803925443	5.89806073893423
ENSMUSG00000026158	468.432390109712	335.328244653224	477.674675395965	529.537971336219	417.407223066646	423.527574379273	266.862540485903	289.679144935988	297.962470576299	306.894159314689	321.909625662745	336.920398311814	441.984679823506	303.37138988124	0.542017013429549	1.39483916390361e-05	0.00711522018678368	Ogfrl1	1	23405505	23436853	-	8109	protein_coding	opioid growth factor receptor-like 1 [Source:MGI Symbol;Acc:MGI:1917405]	-	506	380	400	511	419	412	276	303	279	324	344	317	2.04602581751152	1.38837107988898	2.07389634925923	2.29606916796657	1.83485639224935	1.84345425246179	1.15760918286485	1.26127840069538	1.31601566284392	1.33249019937863	1.39202763031235
ENSMUSG00000023032	214.775325109591	434.161832551016	219.730350682144	272.541069396136	157.399382445179	302.225987542491	80.252140798297	98.4717885425965	167.670637564441	134.50299574903	95.449947144186	159.426055983508	266.805657954426	122.628927630343	1.12377120706142	1.42497464817039e-05	0.00711522018678368	Slc4a8	15	100659628	100721849	+	13021	protein_coding	solute carrier family 4 (anion exchanger), member 8 [Source:MGI Symbol;Acc:MGI:1928745]	-	232	492	184	263	158	294	83	103	157	142	102	150	0.584213433601272	1.11946372756464	0.594111337702622	0.735940624025794	0.430891676286187	0.819229231786987	0.216797332875778	0.267010608346455	0.461189561326274	0.363689128435477	0.257047004018707
ENSMUSG00000046711	959.082917299726	1057.16641340674	718.900386470927	486.01430245927	702.320029264881	614.731770579625	409.962743355156	365.206050711377	593.78900946388	392.142536902102	274.184652090652	244.453285841379	756.369303246862	379.956379727424	0.99389894152492	1.80414309387332e-05	0.00872697842189533	Hmga1	17	27775471	27782648	+	2125	protein_coding	high mobility group AT-hook 1 [Source:MGI Symbol;Acc:MGI:96160]	HMGA	1036	1198	602	469	705	598	424	382	556	414	293	230	15.9855916251589	16.7027178972261	11.9105526455037	8.04165200427877	11.7810917779012	10.2104456640333	6.78620701495797	6.06792297041075	10.0078321426283	6.4972222121702	4.5244458986066
ENSMUSG00000070368	24.0696485036611	15.0015267344863	5.97093344244956	12.4353339648427	5.97719173842452	11.3077750441068	0	0	1.0679658443595	3.78881678166282	0.935783795531235	0	12.4604015713285	0.965427736925592	3.67553255308732	2.16273419042804e-05	1	Prok1	3	107140113	107147023	-	3241	protein_coding	prokineticin 1 [Source:MGI Symbol;Acc:MGI:2180370]	-	26	17	5	12	6	11	0	0	1	4	1	0	0.263040250843152	0.155402912093356	0.0648612522992253	0.134906719614631	0.065739678528534	0.123144807177261	0	0	0.0118017150443647	0.0411592330775873	0.0101245955294831
ENSMUSG00000045180	292.53880489065	375.038168362158	254.361764648351	271.504791565733	207.209313598717	302.225987542491	105.391365626679	117.592524181936	187.961988607271	211.226535577702	111.358271668217	181.745703821199	283.813138434683	152.546064913834	0.89753798331005	2.52641869246456e-05	0.0103160025171203	Shroom2	X	151392505	151552461	-	8375	protein_coding	shroom family member 2 [Source:MGI Symbol;Acc:MGI:107194]	-	316	425	213	262	208	294	109	123	176	223	119	171	1.23717222109079	1.50346518834199	1.06927433751597	1.13985036524385	0.881929512578777	1.27369359129533	0.442651422089451	0.495742241585093	0.803807413581654	0.887986495289394	0.466250015428717
ENSMUSG00000027848	1417.33199458097	880.677863589256	1351.81933137058	1004.15321766105	1305.02019622269	1206.84799107104	660.388098376348	757.181131317829	840.489119510923	950.045808001952	517.488438928773	726.982815284797	1194.30843241593	742.095901903437	0.686430325874098	2.52683812406811e-05	0.0103160025171203	Olfml3	3	103629538	103645317	-	6161	protein_coding	olfactomedin-like 3 [Source:MGI Symbol;Acc:MGI:1914877]	-	1531	998	1132	969	1310	1174	683	792	787	1003	553	684	8.14801603458758	4.79919719314452	7.72484144685685	5.73065066878508	7.55049533423638	6.91384019347811	3.77041953123215	4.3391993544944	4.88593493054125	5.42920246825491	2.94530745064328
ENSMUSG00000022462	2551.38274138807	3431.81985120102	3733.02758821946	2647.6898566811	2684.75528917568	2321.17782269029	1875.77292950236	1915.89771106178	2005.63985570713	2268.55404802061	2015.67829557428	1950.31208486492	2894.9755248926	2005.30915412185	0.52957397925926	2.53251563828782e-05	0.0103160025171203	Slc38a2	15	96585273	96597611	-	8838	protein_coding	solute carrier family 38, member 2 [Source:MGI Symbol;Acc:MGI:1915010]	-	2756	3889	3126	2555	2695	2258	1940	2004	1878	2395	2154	1835	10.2247596759631	13.0368662017609	14.8706287907172	10.5333926697448	10.828296247437	9.26984322552279	7.46565495991907	7.65383949173967	8.1276640852682	9.03728199815238	7.99739257696445
ENSMUSG00000030268	320.311476241028	179.135878064748	177.933816584997	248.706679296854	242.076265406193	230.267419079993	128.596803929801	147.229664422911	169.80656925316	155.341488048176	106.679352690561	122.22664292069	233.071922445636	138.313420210883	0.754377835052728	3.16238041146179e-05	0.0117946421255191	Bcat1	6	144939561	145021910	-	9322	protein_coding	branched chain aminotransferase 1, cytosolic [Source:MGI Symbol;Acc:MGI:104861]	-	346	203	149	240	243	224	133	154	159	164	114	115	1.21701209187529	0.645173026068611	0.672003486088105	0.938066248167819	0.925662204837442	0.871849190514879	0.485246849004611	0.557631441039358	0.652397339084637	0.58670672072333	0.401284575054735
ENSMUSG00000017897	341.603857609651	257.67328273353	280.633871795129	436.272966599899	404.456640966726	394.744146994274	225.28613019281	237.097121927805	268.059426934233	200.80728942813	195.578813266028	221.070797630465	352.564127783202	224.649929896578	0.650771277264211	3.22159146062585e-05	0.0117946421255191	Eya2	2	165436952	165613647	+	2963	protein_coding	EYA transcriptional coactivator and phosphatase 2 [Source:MGI Symbol;Acc:MGI:109341]	-	369	292	235	421	406	384	233	248	251	212	209	208	4.08340642475921	2.91971500910471	3.33449881167198	5.17704346810945	4.86574941124183	4.70221001146311	2.67451138593046	2.82524203872761	3.24015827646146	2.38611034203051	2.31457548066501
ENSMUSG00000036745	219.404103667987	822.436642149485	626.948011457203	325.391238746718	186.289142514231	317.645680784455	170.173214222895	144.36155407701	171.942500941879	146.816650289434	97.3215147352484	226.384999496581	416.35246988668	159.500072293841	1.38480799435916	3.42889654143265e-05	0.0117946421255191	Ttll7	3	146558122	146689764	+	8266	protein_coding	tubulin tyrosine ligase-like family, member 7 [Source:MGI Symbol;Acc:MGI:1918142]	-	237	932	525	314	187	309	176	151	161	155	104	213	0.940114688328879	3.34048690670597	2.67028895036146	1.38409409001835	0.803344014572809	1.35633049841634	0.724164862540539	0.616619389313997	0.744997182659637	0.62534921765943	0.412852246255709
ENSMUSG00000041481	89.7983040328894	72.3603054251693	63.2918944899653	70.4668924674421	68.737704991882	50.3709979237485	36.7419439799432	44.933728752447	29.9030436420659	29.3633300578869	16.8441083195622	42.5136149289355	69.1710165551828	33.3832949468068	1.0551872751603	3.74935902301076e-05	0.0126165931124312	Serpina3g	12	104202504	104208198	+	2105	protein_coding	serine (or cysteine) peptidase inhibitor, clade A, member 3G [Source:MGI Symbol;Acc:MGI:105046]	-	97	82	53	68	69	49	38	47	28	31	18	40	1.51094107325631	1.15412012641482	1.05856645046982	1.17703175464883	1.16399830321912	0.844590960181976	0.613976399921409	0.753670277287651	0.508780065009982	0.491129371322836	0.280593184797617
ENSMUSG00000078780	39.8074956022087	28.2381679707978	32.2430405892276	29.0157792512997	43.8327394151132	33.9233251323204	6.76825283841059	11.4724413836035	24.5632144202684	15.1552671266513	6.55048656871864	11.6912441054573	34.5100913268279	12.7001510738516	1.45170765244542	3.97680144787783e-05	0.0128243561691044	Gm5150	3	16001034	16060601	-	1213	protein_coding	predicted gene 5150 [Source:MGI Symbol;Acc:MGI:3779469]	-	43	32	27	28	44	33	7	12	23	16	7	11	1.16234632754944	0.781589002425981	0.935830767510026	0.841063134898912	1.28809303612023	0.987087353820701	0.196271580961556	0.333930490682256	0.725255766324881	0.439891424252137	0.189362488687043
ENSMUSG00000021306	915.5723988508	772.137405451502	726.065506601866	767.881872329038	981.255643724692	711.361848229265	526.956828133396	578.402253090009	616.216292195429	676.303795526814	478.185519516461	603.693331990884	812.379112531194	579.959670075499	0.486872371777556	5.66601802799661e-05	0.0166261686483508	Gpr137b	13	13532205	13568599	-	5026	protein_coding	G protein-coupled receptor 137B [Source:MGI Symbol;Acc:MGI:1891463]	-	989	875	608	741	985	692	545	605	577	714	511	568	6.45210907128965	5.15792272340004	5.08598940591674	5.37188974994738	6.9593567992875	4.99558162070977	3.68802791484197	4.06320300345758	4.39114202760039	4.73763982912778	3.33622344026044
ENSMUSG00000036437	267.54340067531	1142.76336006822	343.925766285094	358.552129319632	295.870991052014	281.666396553206	162.438068121854	135.757223039308	212.52520302754	227.329006899769	133.817082760967	188.122746060539	448.38700732558	176.66488831833	1.34469653349363	6.35268828578813e-05	0.0180519299036841	Npy1r	8	67149844	67159444	+	3454	protein_coding	neuropeptide Y receptor Y1 [Source:MGI Symbol;Acc:MGI:104963]	-	289	1295	288	346	297	274	168	142	199	240	143	177	2.7434901330897	11.1080211405781	3.50561735877911	3.64993501934407	3.05344057802358	2.8782643495513	1.65427280398171	1.38771934226153	2.20371231421495	2.31726243898889	1.35853370523475
ENSMUSG00000026796	3974.26927023911	4802.2534405338	2953.22368063555	2903.65048079078	3862.26206164531	3538.30560925597	2095.25770011939	2159.68709046335	3127.0039922846	2585.86745348488	2077.44002607934	2517.8688441662	3672.32742385009	2427.1875177663	0.597704134401078	6.41421373927661e-05	0.0180519299036841	Niban2	2	32766126	32815266	+	4672	protein_coding	niban apoptosis regulator 2 [Source:MGI Symbol;Acc:MGI:2442910]	-	4293	5442	2473	2802	3877	3442	2167	2259	2928	2730	2220	2369	30.1290853336945	34.5100005150916	22.2543871211269	21.8522753373894	29.4678413875665	26.7307091697481	15.7752503008714	16.3210850253518	23.9713445135543	19.487051215977	15.5921805065371
ENSMUSG00000036109	102.758883996399	212.668702530071	94.340748390703	104.66406087076	44.8289380381839	28.7834273849992	35.7750507173131	8.60433103770261	27.7671119533469	46.4130055753696	14.9725407284998	29.7595304502548	98.0074602018526	27.2152617437478	1.85032663640269	6.92131206309996e-05	0.0187956121797762	Mbnl3	X	50206146	50295409	-	8743	protein_coding	muscleblind like splicing factor 3 [Source:MGI Symbol;Acc:MGI:2444912]	-	111	241	79	101	45	28	37	9	26	49	16	28	0.416284646535139	0.816668541426692	0.379892718230386	0.420912925629771	0.182771043787297	0.116198360888421	0.143933347905028	0.0347470277820179	0.11374623355009	0.186905428509052	0.060050443300569
ENSMUSG00000037876	1121.0901668436	1468.38473448148	1151.19596770427	1307.78262196929	1204.40413529254	971.440674243721	752.242958326206	763.873388791598	813.789973401936	1019.1917142673	900.224011301048	925.73396507757	1204.04971675582	862.509335194276	0.481550666219593	7.26801360715588e-05	0.0193968245905458	Jmjd1c	10	66931904	67092105	+	17822	protein_coding	jumonji domain containing 1C [Source:MGI Symbol;Acc:MGI:1918614]	-	1211	1664	964	1262	1209	945	778	799	762	1076	962	871	2.22800210535379	2.76621635714404	2.27412823733054	2.580086596987	2.40893575745495	1.92387928330725	1.48471583079944	1.51330326970815	1.63539508167406	2.01345601025698	1.77123157753533
ENSMUSG00000054342	524.903488522147	683.010687793671	291.381551991538	208.291843911116	338.707531844056	301.198007993027	203.047585152318	130.021002347506	288.350777977064	153.447079657344	124.459244805654	163.677417476402	391.248852009259	177.167184569381	1.1447162852964	7.68008879035679e-05	0.0195838027349048	Kcnn4	7	24069688	24086115	+	5115	protein_coding	potassium intermediate/small conductance calcium-activated channel, subfamily N, member 4 [Source:MGI Symbol;Acc:MGI:1277957]	-	567	774	244	201	340	293	210	136	270	162	133	154	3.63467274111712	4.48316357524231	2.00557332407572	1.43179811555026	2.36041646652762	2.07837749538826	1.39634854959746	0.897488517218481	2.01902771923211	1.05622316977139	0.853223319016671
ENSMUSG00000026437	388.817398905294	1161.29465779906	263.91525815627	184.457453811834	324.760751121066	286.806294300527	113.12651172772	128.108928783572	255.243836801919	163.866325806917	89.8352443709986	165.803098222848	435.008635682342	152.663990952329	1.51208222358401	9.68441672586528e-05	0.0227128918938892	Cdk18	1	132039975	132067422	-	4764	protein_coding	cyclin-dependent kinase 18 [Source:MGI Symbol;Acc:MGI:97518]	-	420	1316	221	178	326	279	117	134	239	173	96	156	2.89071602929596	8.18414657643664	1.95036042960098	1.36138078526871	2.42997163392734	2.12488240014425	0.83528424618103	0.949442517080801	1.91889098901131	1.21104606800859	0.661235548837374
ENSMUSG00000033767	553.601915584205	768.607634455152	542.16075657442	480.832913307252	540.935852327419	450.255042665344	351.949147597351	333.656836906468	432.526166965596	419.611458569157	385.542923758869	363.491407642398	556.065685818965	381.12965690664	0.546065083091056	0.000108261725273613	0.0238278681152175	Tmem131l	3	83804962	83947482	-	11726	protein_coding	transmembrane 131 like [Source:MGI Symbol;Acc:MGI:2443399]	-	598	871	454	464	543	438	364	349	405	443	412	342	1.67216522416861	2.20068319762202	1.62779728280082	1.44178153048605	1.64439177716558	1.35527263568867	1.05577573262247	1.00464162355701	1.32108051985403	1.2599118190597	1.15293291947421
ENSMUSG00000037280	261.063110693555	1069.52061189397	181.516376650467	98.4463938883382	172.34236179124	134.665320979817	73.4838879598865	80.3070896852243	87.5731992374786	85.2483775874135	29.0092976614683	39.3250938092653	319.592362649564	65.8244909901228	2.28014885196701	0.000110360595738766	0.0238278681152175	Galnt6	15	100589694	100627257	-	3871	protein_coding	polypeptide N-acetylgalactosaminyltransferase 6 [Source:MGI Symbol;Acc:MGI:1891640]	-	282	1212	152	95	173	131	76	84	82	90	31	37	2.38865721182271	9.27617025195823	1.65087721222795	0.894194102207589	1.58700497602684	1.22786486761835	0.6677449350734	0.732473210122199	0.810242158000636	0.77536403360898	0.262781771491267
ENSMUSG00000002341	572.11702981779	187.960305555623	323.624592580766	455.962245377566	343.68852495941	269.330641959635	107.325152151939	207.45998168683	240.292314980887	113.664503449885	123.523461010123	216.819436137571	358.780556708465	168.180808236206	1.09412587093118	0.000112373820816001	0.0238278681152175	Ncan	8	70545735	70573523	-	7195	protein_coding	neurocan [Source:MGI Symbol;Acc:MGI:104694]	-	618	213	271	440	345	262	111	217	225	120	132	204	2.81634315466553	0.877077697045684	1.58355389487658	2.22819525641938	1.70272163188065	1.32121331551095	0.524701568061288	1.0180393524192	1.19612309287378	0.556207398489759	0.602004650821295
ENSMUSG00000029919	550.824648449167	159.722137584825	425.130461102408	306.738237799454	450.281777627981	252.882969168207	116.02719151561	157.746069024548	258.447734334998	206.490514600624	125.395028601185	122.22664292069	357.596705288674	164.388863499609	1.12138170952631	0.000116047784829283	0.0239541676720235	Hpgds	6	65094277	65121892	-	6425	protein_coding	hematopoietic prostaglandin D synthase [Source:MGI Symbol;Acc:MGI:1859384]	-	595	181	356	296	452	246	120	165	242	218	134	115	3.03648910221299	0.834631372809491	2.32954563292878	1.67861054174088	2.49816235398605	1.38919887845957	0.63522604390804	0.866854968321661	1.44067622521809	1.13153938599893	0.684365928541841
ENSMUSG00000018001	1577.48773270148	1436.61679551434	1489.15080054692	1426.9545724657	1472.38156489857	1737.28543859459	1066.48326868098	1001.92654750137	1328.54951038321	1277.77845961579	1149.14250091236	1254.1516404036	1523.3128174536	1179.67198791622	0.369107372526861	0.000116983585756366	0.0239541676720235	Cyth3	5	143608202	143696005	+	9437	protein_coding	cytohesin 3 [Source:MGI Symbol;Acc:MGI:1335107]	-	1704	1628	1247	1377	1478	1690	1103	1048	1244	1349	1228	1180	5.92057011225228	5.1110450381038	5.55554736507642	5.31656774733491	5.56154986768441	6.49763330896703	3.97522521927555	3.74854697897513	5.04208985087739	4.76721027264007	4.26993363657679
ENSMUSG00000006219	1067.3963355662	1427.79236802346	822.794628369549	821.768319510023	1049.99334871657	728.837500570157	424.466142294607	601.347135857216	774.275237160634	714.191963343442	443.561519081805	546.299951836821	986.430416792661	584.023658262421	0.756867132957937	0.000117672173058078	0.0239541676720235	Fblim1	4	141303373	141333407	-	4457	protein_coding	filamin binding LIM protein 1 [Source:MGI Symbol;Acc:MGI:1921452]	-	1153	1618	689	793	1054	709	439	629	725	754	474	514	8.48231831767662	10.7553648066757	6.49936524951908	6.48278950469148	8.39756421393207	5.77173057547078	3.34997886993478	4.76369164589925	6.22184987269911	5.64176543083707	3.48973477420685
ENSMUSG00000038024	1132.19923538375	1057.16641340674	1164.33202127766	1115.03494551423	1254.21406644608	936.489369561937	662.321884901608	801.158823288309	933.402147970199	853.430980069551	825.361307658549	920.419763211453	1109.9060085984	832.682484516612	0.414867092811673	0.000119700076321888	0.0239541676720235	Dennd4c	4	86666792	86768840	+	8482	protein_coding	DENN/MADD domain containing 4C [Source:MGI Symbol;Acc:MGI:1914769]	-	1223	1198	975	1076	1259	911	685	838	874	901	882	866	4.72776718570451	4.18454085494051	4.83282093219157	4.62216420871274	5.27087623441252	3.89692957895897	2.74670795262003	3.33488898250775	3.94128027505058	3.5425242878572	3.41214148148435
ENSMUSG00000029516	196.260210876006	132.366412363115	167.186136388588	149.224007578113	186.289142514231	116.161689089461	81.2190340609271	75.5269057753896	93.9809943036356	124.083749599457	93.5783795531235	110.535398815232	157.914599801585	96.4874103512942	0.711089382555131	0.00012998113394185	0.0240834347295873	Cit	5	115983337	116147006	+	16417	protein_coding	citron [Source:MGI Symbol;Acc:MGI:105313]	-	212	150	140	144	187	113	84	79	88	131	100	104	0.42341862336022	0.270699044799992	0.358532553063903	0.319595062389733	0.404485693150931	0.249739417383034	0.174022606595383	0.162431002063961	0.205027931069817	0.266111603017974	0.199877042766978
ENSMUSG00000023913	648.02899817549	1163.94198604632	503.946782542743	435.236688769495	684.388454049608	350.541026367311	240.756422394891	262.910115040913	490.196322561008	327.732651613834	199.321948448153	281.652698904198	631.013989325161	300.428359827166	1.07168316278976	0.000132304738834579	0.0240834347295873	Pla2g7	17	43878989	43923092	+	2905	protein_coding	phospholipase A2, group VII (platelet-activating factor acetylhydrolase, plasma) [Source:MGI Symbol;Acc:MGI:1351327]	-	700	1319	422	420	687	341	249	275	459	346	213	265	7.90095878575214	13.4520329137741	6.10746055023442	5.26786359362675	8.39780830764443	4.25902992148248	2.9152338086494	3.19537760841461	6.04353030381508	3.97206434973695	2.40596984704119
ENSMUSG00000034023	58.3226098357941	187.960305555623	65.6802678669451	47.6687801985638	67.7415063688112	34.9513046817847	24.1723315657521	24.8569563311409	26.6991461089874	21.7856964945612	19.6514597061559	44.6392956753823	77.0541290845869	26.96748098033	1.52042419064847	0.000135865388401792	0.0240834347295873	Fancd2	6	113508643	113573978	+	7937	protein_coding	Fanconi anemia, complementation group D2 [Source:MGI Symbol;Acc:MGI:2448480]	-	63	213	55	46	68	34	25	26	25	23	21	42	0.260262778699118	0.79508303266268	0.291340368617825	0.211170291046858	0.304234099188328	0.155426470753675	0.107128200519433	0.110573892477605	0.120478009508587	0.0966401887143314	0.0868199692997541
ENSMUSG00000030703	80.5407469160967	150.015267344863	60.9035211129855	95.3375603971275	88.6616774532971	60.6507934183911	45.443983343614	43.021655188513	39.5147362413013	58.7266601157737	48.6607573676242	31.8852111967016	89.3515944404602	44.5421672422547	1.00589974091736	0.000136938463679205	0.0240834347295873	Gdpd3	7	126365506	126374821	+	2186	protein_coding	glycerophosphodiester phosphodiesterase domain containing 3 [Source:MGI Symbol;Acc:MGI:1915866]	-	87	170	51	92	89	59	47	45	37	62	52	30	1.30495936395051	2.30402945148475	0.980876601444762	1.53344794148116	1.44575667367163	0.97927417797674	0.731253372251946	0.694861079364552	0.647404511882473	0.945862146966669	0.780566483886022
ENSMUSG00000003882	610.998769708319	174.723664319311	391.693233824691	388.604186401335	515.03468812758	351.569005916775	101.523792576159	133.845149475374	322.525684996568	151.552671266513	44.9176221854993	166.865938596072	405.437258049669	153.538476516031	1.40196563193284	0.000138040890537375	0.0240834347295873	Il7r	15	9505874	9530262	-	4663	protein_coding	interleukin 7 receptor [Source:MGI Symbol;Acc:MGI:96562]	-	660	198	328	375	517	342	105	140	302	160	48	157	4.64094490975233	1.25802432090833	2.9573503982066	2.93019969889972	3.93713661174408	2.66111191509629	0.765850614539033	1.01344048766282	2.47722630378585	1.14430258978735	0.337778914289218
ENSMUSG00000047534	92.5755711679272	76.7725191706065	91.9523750137232	54.9227250113887	135.483012737622	79.1544253087477	10.6358258889309	21.98884598524	57.6701555954128	54.9378433341109	14.0367569329685	31.8852111967016	88.4767714016693	31.8591064888941	1.47645602473734	0.000165263863442765	0.0268457759433749	Mis18bp1	12	65179508	65219378	-	7990	protein_coding	MIS18 binding protein 1 [Source:MGI Symbol;Acc:MGI:2145099]	MYB	100	87	77	53	136	77	11	23	54	58	15	30	0.410375206018415	0.322598048400407	0.405170952191183	0.241690988197373	0.604432051378663	0.349660355498188	0.0468237386871096	0.0971665285726351	0.2585063024749	0.242084803362288	0.0616029050895895
ENSMUSG00000018263	76.8377240693796	134.131297861289	33.4372272777175	59.0678363330029	36.8593490536179	76.0704866603549	43.5101968183538	21.98884598524	20.2913510428304	4.73602097707853	14.0367569329685	24.4453285841379	69.4006535425604	21.5014167234349	1.6944812238512	0.000165676252562652	0.0268457759433749	Tbx5	5	119970733	120023284	+	4675	protein_coding	T-box 5 [Source:MGI Symbol;Acc:MGI:102541]	T-box	83	152	28	57	37	74	45	23	19	5	15	23	0.582135883155577	0.963277098337518	0.251808724006421	0.444247106264673	0.281044742606282	0.574318165961133	0.327379197762767	0.166066430651413	0.15545193812127	0.0356676669530643	0.105284965062208
ENSMUSG00000024521	112.942196824871	213.551145279158	46.5732808511065	63.2129476546172	90.6540746994386	61.6787729678553	41.5764102930937	38.2414712786783	57.6701555954128	30.3105342533026	29.9450814569995	34.0108919431484	98.1020697128412	38.6257574701059	1.35009471035812	0.000166496187774662	0.0268457759433749	Pmaip1	18	66591604	66598636	+	2732	protein_coding	phorbol-12-myristate-13-acetate-induced protein 1 [Source:MGI Symbol;Acc:MGI:1930146]	-	122	242	39	61	91	60	43	40	54	32	32	32	1.46422234012676	2.62436316464743	0.600175507274508	0.813542989706328	1.18281290434963	0.796843444818654	0.535313187166586	0.494213866761318	0.756026850942332	0.390621008505009	0.384349213599469
ENSMUSG00000056888	176.819340930741	133.248855112202	71.6512013093947	70.4668924674421	134.486814114552	79.1544253087477	51.2453429193945	29.6371402409757	75.8255749495242	41.676984598291	9.35783795531235	36.1365726895952	110.971254873847	40.6465755588488	1.45330347032643	0.00018975767517954	0.0296534979321011	Glipr1	10	111821353	111838536	-	1543	protein_coding	GLI pathogenesis-related 1 (glioma) [Source:MGI Symbol;Acc:MGI:1920940]	-	191	151	60	68	135	77	53	31	71	44	10	34	4.05877834188362	2.89934758691166	1.6348566587307	1.60573677481256	3.10687084089243	1.810619728082	1.16823476237732	0.678158794616811	1.7600158461269	0.950983680135494	0.212662437531139
ENSMUSG00000007480	139.78911246357	97.9511451487048	167.186136388588	197.92906560708	128.509622376127	161.392789265888	32.8743709294229	65.010501173753	108.932516124669	49.2546181616167	21.5230272972184	94.5927932168814	148.79297854166	62.0313044839268	1.26482472207373	0.000193017139864647	0.0296534979321011	Mc5r	18	68470667	68475517	+	3904	protein_coding	melanocortin 5 receptor [Source:MGI Symbol;Acc:MGI:99420]	-	151	111	140	191	129	157	34	68	102	52	23	89	1.26822126616075	0.842369109035935	1.50769183495136	1.78260419974737	1.17337075035503	1.45912430722932	0.296202888686201	0.587942336779269	0.999342869568694	0.444201323580427	0.193319089281316
ENSMUSG00000030165	55.5453427007563	33.5328244653224	35.8256006546973	84.9747820930919	81.6882870918018	53.4549365721413	29.9736911415326	22.944882767207	24.5632144202684	33.1521468395497	14.0367569329685	27.6338497038081	57.5036289296352	25.384090300889	1.18076790459028	0.000194342557999379	0.0296534979321011	Klrd1	6	129568745	129575738	+	1281	protein_coding	killer cell lectin-like receptor, subfamily D, member 1 [Source:MGI Symbol;Acc:MGI:1196275]	-	60	38	30	82	82	52	31	24	23	35	15	26	1.53578355788625	0.878868156660401	0.9846150758866	2.33236271260888	2.27310804646113	1.47284370471919	0.823062368562216	0.632408563930642	0.686756631188197	0.911182202216261	0.384236699192678
ENSMUSG00000023830	2570.82361133334	2467.30992644846	2384.79081691435	2106.75282921044	2501.45474253066	1839.05541399155	1791.65321565355	1716.08602363069	1740.78432630598	1771.27184542737	1952.04499747816	1866.34769538027	2311.69789007147	1806.36468397933	0.355996370713903	0.000201970341896851	0.0300605665598208	Igf2r	17	12901293	12988551	-	9308	protein_coding	insulin-like growth factor 2 receptor [Source:MGI Symbol;Acc:MGI:96435]	-	2777	2796	1997	2033	2511	1789	1853	1795	1630	1870	2086	1756	9.78244462551996	8.899591137999	9.02019749564832	7.95815458857062	9.57956293075253	6.97359007491141	6.7707881628691	6.5094412058592	6.69815795958545	6.69994975119095	7.35384789811561
ENSMUSG00000022148	506.388374288562	204.726717788284	472.897928642005	341.971684033175	542.928249573561	300.170028443563	155.669815283444	173.998694317986	320.389753307849	230.170619486016	155.340110058185	204.06535165889	394.847163794858	206.605724018728	0.93477346820081	0.000220881441918035	0.0325157979043008	Fyb	15	6552334	6692794	+	5384	protein_coding	FYN binding protein [Source:MGI Symbol;Acc:MGI:1346327]	-	547	232	396	330	545	292	161	182	300	243	166	192	3.33127256530398	1.27665101868215	3.09232043855529	2.23326498002471	3.59456886052759	1.96779679619679	1.01704696085558	1.1410428848743	2.13127926033355	1.5051768703698	1.01171863715362
ENSMUSG00000056380	1378.45025469044	445.633588289152	1286.13906350363	865.291988386973	970.297458870914	390.632228796417	52.2122361820246	62.1423908278522	308.642129019894	158.183100634423	14.9725407284998	373.056971001409	889.407430422921	161.53489473235	2.46154264715007	0.000226295980530694	0.0326108493318138	Gpr50	X	70707273	70712863	+	3069	protein_coding	G-protein-coupled receptor 50 [Source:MGI Symbol;Acc:MGI:1333877]	-	1489	505	1077	835	974	380	54	65	289	167	16	351	15.9083706981875	4.87510250968425	14.7541152324423	9.91336174531069	11.269831560774	4.49251108218168	0.598435092684627	0.714911196313741	3.60184574603753	1.81470441719981	0.171072344664997
ENSMUSG00000039202	2940.20014029337	3516.53435511341	3034.42837545286	3555.46923611461	2962.69470501242	3043.84744596366	1712.36796811788	1948.40296164866	2406.12704734194	2655.96056394564	2002.57732243684	2848.41220023868	3175.52904299172	2262.30801062161	0.489374894210848	0.000234967264035303	0.0326108493318138	Abhd2	7	78922947	79015256	+	10573	protein_coding	abhydrolase domain containing 2 [Source:MGI Symbol;Acc:MGI:1914344]	-	3176	3985	2541	3431	2974	2961	1771	2038	2253	2804	2140	2680	9.84940860491133	11.166558769601	10.1041733627399	11.8237122792953	9.98844973962058	10.1611444219161	5.6969251120506	6.50641226420017	8.1505537319252	8.84435346235949	6.64159294407047
ENSMUSG00000021451	523.977732810468	367.978626369459	1030.58311216679	352.33446233721	451.277976251051	241.5751941241	323.909242981078	137.669296603242	305.438231486816	227.329006899769	136.62443414756	119.038121801019	494.621184009847	208.334722319914	1.24692514471246	0.000242331753597569	0.0327872605703515	Sema4d	13	51839565	51947783	-	7679	protein_coding	sema domain, immunoglobulin domain (Ig), transmembrane domain (TM) and short cytoplasmic domain, (semaphorin) 4D [Source:MGI Symbol;Acc:MGI:109244]	-	566	417	863	340	453	235	335	144	286	240	146	112	2.41679412577851	1.60886887451211	4.72498554602537	1.61326464613607	2.09483051274631	1.11036469254346	1.48374859601572	0.632985053049995	1.42457566339534	1.04230035997755	0.623885513766634
ENSMUSG00000026840	470.28390153307	271.792366718929	360.644379923953	625.91180956375	421.392017558929	415.303737983559	232.05438303122	239.009195491739	196.505715362147	214.068148163949	294.771895592339	351.800163536941	427.554702213698	254.701583529723	0.74728875255666	0.000257510435946054	0.0327872605703515	Lamc3	2	31777303	31836551	+	6091	protein_coding	laminin gamma 3 [Source:MGI Symbol;Acc:MGI:1344394]	-	508	308	302	604	423	404	240	250	184	226	315	331	2.73465790709615	1.49813648037246	2.0845518387109	3.61309770803503	2.46607979261599	2.40655180228425	1.34011733118015	1.38543782218839	1.15545591141301	1.23738872169628	1.69698759562998
ENSMUSG00000026321	512.868664270317	398.864122587519	358.256006546973	218.654622215151	376.563079520745	301.198007993027	189.511079475497	150.097774768812	275.53518784475	269.953195693476	128.202379987779	188.122746060539	361.067417188955	200.237060638476	0.851705687750862	0.000258630022771183	0.0327872605703515	Tnfrsf11a	1	105708443	105775709	+	5987	protein_coding	tumor necrosis factor receptor superfamily, member 11a, NFKB activator [Source:MGI Symbol;Acc:MGI:1314891]	-	554	452	300	211	378	293	196	157	258	285	137	177	3.0340895848209	2.23675511469698	2.10671774212583	1.28411690767754	2.24201182244724	1.77566408700701	1.11344045027197	0.885168651188957	1.64829371678083	1.58752990668412	0.750875652783446
ENSMUSG00000029249	570.265518394432	598.296183881278	630.530571522673	606.222530786083	593.734379350169	506.793917885878	477.645271739262	411.095816245791	449.613620475348	501.071019374908	479.121303311992	483.592369816641	584.307183636752	467.02323349399	0.322746788412463	0.000261611345057725	0.0327872605703515	Rest	5	77413338	77434279	+	7222	protein_coding	RE1-silencing transcription factor [Source:MGI Symbol;Acc:MGI:104897]	zf-C2H2	616	678	528	585	596	493	494	430	421	529	512	455	2.79673373579296	2.78138733142291	3.07376594501647	2.95141139098757	2.93051623913374	2.47680538997408	2.3264281617072	2.009771123361	2.22971197883536	2.44278082110079	2.32631858555248
ENSMUSG00000032532	146.269402445325	176.488549817486	53.738400982046	68.394336806635	12.9505820999198	4.11191819785702	2.90067978789026	1.91207356393391	39.5147362413013	8.52483775874135	7.48627036424988	3.18852111967016	76.9921983915448	10.5878531392978	2.86903289098033	0.000269111272011595	0.0327872605703515	Cck	9	121318890	121324760	-	1305	protein_coding	cholecystokinin [Source:MGI Symbol;Acc:MGI:88297]	-	158	200	45	66	13	4	3	2	37	9	8	3	3.96985339143117	4.5405529690743	1.44976081863303	1.84274308849855	0.353743279111459	0.111212071072519	0.078186347358413	0.0517315051337901	1.08446456932957	0.22999495586976	0.201157481140565
ENSMUSG00000024795	101.83312828472	66.1832061815573	71.6512013093947	96.3738382275311	167.361368675887	87.3782617044617	29.0067978789025	36.3293977147443	60.8740531284912	54.9378433341109	34.6240004346557	68.0217838862968	98.4635007305919	47.2989793962003	1.0613628966698	0.000271304259844797	0.0327872605703515	Kif20b	19	34899761	34953145	+	6957	protein_coding	kinesin family member 20B [Source:MGI Symbol;Acc:MGI:2444576]	-	110	75	60	93	168	85	30	38	57	58	37	64	0.518440087062793	0.31939530102641	0.362596496251469	0.487071044501999	0.85751679561699	0.443301673987322	0.146662617942689	0.184372958141774	0.313384135712348	0.278030412370947	0.174516475795461
ENSMUSG00000044827	278.652469215461	126.189313119503	167.186136388588	159.586785882148	269.969826852174	129.525423232496	93.7886464751182	82.2191632491583	147.37928652161	106.086869886559	71.1195684603739	95.6556335901048	188.518325781728	99.3748613638208	0.925613544533329	0.000271494062122496	0.0327872605703515	Tlr1	5	65082022	65090906	-	3346	protein_coding	toll-like receptor 1 [Source:MGI Symbol;Acc:MGI:1341295]	-	301	143	140	154	271	126	97	86	138	112	76	90	2.94963618267253	1.26619141112343	1.75912400587271	1.67697331275496	2.87606509205396	1.36630311165977	0.985975172381421	0.867577229701921	1.57752883063732	1.11629350966076	0.745322735337763
ENSMUSG00000107622	44.4362741606051	9.70687023996174	23.8837337697982	19.6892787776676	28.8897600690519	32.8953455828562	4.83446631315042	11.4724413836035	14.9515218210329	4.73602097707853	6.55048656871864	8.5027229857871	26.5835437666568	8.50794334156185	1.65087703552361	0.000294044040051517	0.0342910535232589	4930512J16Rik	6	89246493	89262707	-	1974	lncRNA	RIKEN cDNA 4930512J16 gene [Source:MGI Symbol;Acc:MGI:1922381]	-	48	11	20	19	29	32	5	12	14	5	7	8	0.797300400264349	0.165095334019913	0.425968224319735	0.350701658525388	0.52168242529706	0.58817326342305	0.0861475711775827	0.205196395743453	0.271272045806994	0.0844712983817506	0.116361042947002
ENSMUSG00000048271	1342.34578193494	1585.74962011011	1307.63442389645	1470.47824134265	1392.68567505291	1269.55474358836	1160.2719151561	1036.34387165218	1083.98533202489	1195.37169461462	1149.14250091236	1205.26098323532	1394.74141432091	1138.39604959924	0.293481477838027	0.000296490743921826	0.0342910535232589	Rbm33	5	28522119	28624237	+	12502	protein_coding	RNA binding motif protein 33 [Source:MGI Symbol;Acc:MGI:1919670]	-	1450	1797	1095	1419	1398	1235	1200	1084	1015	1262	1228	1134	3.80291309336614	4.25851170192034	3.68238320234297	4.13555944693234	3.97084590144441	3.58418082398421	3.26453953936103	2.92674859191978	3.10535105068532	3.36640353340324	3.22311340012599
ENSMUSG00000051517	71.2831897993039	87.3618321596556	45.3790941626166	37.3060018945282	89.6578760763678	66.8186707151766	16.4371854647114	18.1646988573722	17.0874535097519	59.6738643111894	24.3303786838121	22.3196478376911	66.3011108012748	26.3355381107547	1.33135040010495	0.000299270663948918	0.0342910535232589	Arhgef39	4	43496142	43499695	-	2675	protein_coding	Rho guanine nucleotide exchange factor (GEF) 39 [Source:MGI Symbol;Acc:MGI:3036286]	-	77	99	38	36	90	65	17	19	16	63	26	21	0.943832291583961	1.09647988941973	0.597247260610691	0.490354405537593	1.19474185856624	0.881641488666023	0.216145061202043	0.23975377005464	0.228781209473113	0.785422026867385	0.318938006313055
ENSMUSG00000074802	274.949446368744	183.548091810186	182.710563338956	141.970062765288	245.064861275405	114.105729990532	64.7818485962157	51.6259862262157	156.990979120846	107.034074081975	42.1102707989056	95.6556335901048	190.391459258185	86.366465402377	1.14299649425228	0.000301326069285107	0.0342910535232589	Gas2l3	10	89244685	89279829	-	7032	protein_coding	growth arrest-specific 2 like 3 [Source:MGI Symbol;Acc:MGI:1918780]	-	297	208	153	137	246	111	67	54	147	113	45	90	1.38485875304022	0.876342219799153	0.914759492644304	0.709860600624879	1.24225742641498	0.57272556012549	0.324053056564412	0.259209269537698	0.799581298839812	0.535902638214734	0.209986011802824
ENSMUSG00000026065	101.83312828472	337.093130151398	57.3209610475157	63.2129476546172	38.8517462997594	26.7274682860706	28.0399046162725	18.1646988573722	36.3108387082229	43.5713929891224	12.1651893419061	24.4453285841379	104.173230287347	27.1162255161723	1.94462145633504	0.000302065065741805	0.0342910535232589	Slc9a4	1	40619241	40669885	+	4562	protein_coding	solute carrier family 9 (sodium/hydrogen exchanger), member 4 [Source:MGI Symbol;Acc:MGI:105074]	-	110	382	48	61	39	26	29	19	34	46	13	23	0.790615450612856	2.48083193841871	0.442364546150192	0.487198476080159	0.303574076659658	0.206785706460466	0.216203588760714	0.140583370209593	0.285067555370173	0.336270573356268	0.0935071423594281
ENSMUSG00000031004	883.170948942025	303.560305686076	691.434092635659	516.066359540973	1132.67783443145	453.338981313737	165.338747909745	223.712606980268	412.234815922765	476.4437102941	186.220975310716	318.852111967016	663.374753758319	297.133828064102	1.15890396045175	0.000319808625877757	0.0348613923940972	Mki67	7	135291513	135318090	-	10061	protein_coding	antigen identified by monoclonal antibody Ki 67 [Source:MGI Symbol;Acc:MGI:106035]	-	954	344	579	498	1137	441	171	234	386	503	199	300	3.10910306417566	1.01299326054907	2.41953423175302	1.80351417833688	4.01305093847833	1.59037627876429	0.578062960764889	0.785073537556181	1.46747364726085	1.66729769469843	0.649035782536516
ENSMUSG00000060621	17.5893585219062	67.0656489306447	3.58256006546973	1.03627783040356	8.96578760763678	2.05595909892851	0	0.956036781966956	0	2.84161258624712	1.87156759106247	0	16.7159320091649	0.944869493212757	4.12317671246063	0.00032105556920898	1	Nkpd1	7	19251763	19258981	+	2916	protein_coding	NTPase, KAP family P-loop domain containing 1 [Source:MGI Symbol;Acc:MGI:1916797]	-	19	76	3	1	9	2	0	1	0	3	2	0	0.213645610513222	0.772174285790105	0.0432541808028373	0.0124952182862089	0.109599947587952	0.0248854171381409	0	0.011575722599382	0	0.0343099471204888	0.0225060453436589
ENSMUSG00000059493	63.8771441058698	82.067175665131	107.476801964092	55.9590028417922	55.7871228919622	52.426957022677	18.3709719899716	29.6371402409757	50.1943946848963	39.7825762074596	23.3945948882809	40.3879341824887	69.5990340819207	33.6279353656788	1.05130695921329	0.000331310126668355	0.0353679272462032	Nhs	X	160616292	160942726	-	8805	protein_coding	NHS actin remodeling regulator [Source:MGI Symbol;Acc:MGI:2684894]	-	69	93	90	54	56	51	19	31	47	42	25	38	0.256949409233404	0.31292686603731	0.429741707737899	0.223457927566109	0.225846842593504	0.210156711818044	0.0733912732444388	0.11884145600156	0.204170340438722	0.15907657935796	0.0931681263800531
ENSMUSG00000038342	2084.80186270172	1936.07939149782	2462.4129516662	2925.41231522925	2050.17676627961	2385.94053430654	1231.82201659073	1186.44164642099	1497.28811379201	1840.41775169272	1290.44585403757	2127.80642719322	2307.47063694686	1529.03696828787	0.593709753655558	0.000335276858441461	0.0353803063610886	Mlxip	5	123532861	123595995	+	8326	protein_coding	MLX interacting protein [Source:MGI Symbol;Acc:MGI:2141183]	bHLH	2252	2194	2062	2823	2058	2321	1274	1241	1402	1943	1379	2002	8.86869812873917	7.80709527051674	10.412298514607	12.3539499835765	8.77736827432929	10.1144246376384	5.20419070893092	5.03119332342654	6.44073991823422	7.78256412346466	5.43481259418021
ENSMUSG00000112449	366.599261824992	527.700763954284	416.771154282979	537.828193979448	485.148729435457	538.66128391927	58.9804890204352	231.360901236003	70.4857457277267	320.155018050508	275.120435886183	264.647252932623	478.784897899405	203.458307142247	1.23426071696343	0.000335997482723692	0.0353803063610886	Srp54b	12	55201889	55236358	+	4513	protein_coding	signal recognition particle 54B [Source:MGI Symbol;Acc:MGI:3714357]	-	396	598	349	519	487	524	61	242	66	338	294	249	2.87711847296811	3.92577235933514	3.25128057730664	4.19018686798618	3.83194250609523	4.21277633729283	0.459710774907044	1.81002954091538	0.559374619605558	2.49768508468356	2.13766039190119
ENSMUSG00000073530	5.55453427007563	35.2977099634972	20.3011737043285	6.21766698242136	6.97339036149528	6.16787729678553	0.966893262630085	0	5.33982922179748	1.89440839083141	0	0	13.4187254297673	1.3668551458765	3.32302197102034	0.000358223913196703	1	Pappa2	1	158539297	158808060	-	10294	protein_coding	pappalysin 2 [Source:MGI Symbol;Acc:MGI:3051647]	-	6	40	17	6	7	6	1	0	5	2	0	0	0.0191115090115823	0.115123792979249	0.0694319101987646	0.0212372585132611	0.0241473364221367	0.0211480113779344	0.00330396940945304	0	0.0185784721482349	0.00647936052090832	0
ENSMUSG00000028068	319.385720529349	71.4778626760819	177.933816584997	175.130953338202	335.718935974844	145.973096023924	61.8811688083254	57.3622069180174	76.8935407938837	148.711058680266	57.0828115274053	107.346877695562	204.2700641879	84.8796107372433	1.26725033950876	0.000363561485040209	0.0371186384327812	Iqgap3	3	87989278	88028355	+	11384	protein_coding	IQ motif containing GTPase activating protein 3 [Source:MGI Symbol;Acc:MGI:3028642]	-	345	81	149	169	337	142	64	60	72	157	61	101	0.993692703926618	0.210804265458538	0.55028254544214	0.540907725958966	1.05121214662977	0.452580571206266	0.191207652007925	0.177906572908282	0.241914424546082	0.459929301684388	0.175829467741948
ENSMUSG00000068966	470.28390153307	359.154198878584	409.60603415204	531.610526997026	484.152530812386	480.066449599807	280.399046162725	303.063659883525	334.273309284522	347.623939717564	310.68022011637	407.067862944557	455.812273662152	330.518006351544	0.464206634942881	0.000368094799266856	0.0371186384327812	Zbtb34	2	33296120	33321336	-	6604	protein_coding	zinc finger and BTB domain containing 34 [Source:MGI Symbol;Acc:MGI:2685195]	ZBTB	508	407	343	513	486	467	290	317	313	367	332	383	2.52222915083626	1.82589839584288	2.18364186295317	2.83035993278106	2.61327167580092	2.56573775492432	1.49352024822286	1.6202716309261	1.81284815227136	1.85329823994689	1.64963450709724
ENSMUSG00000052889	125.902776788381	532.995420448808	113.447735406542	158.550508051745	148.433594837542	121.301586836782	95.7224330003784	56.4061701360504	90.7770967705571	96.6148279324019	53.3396763452804	86.0900702310944	200.105270394967	79.8250457359604	1.32794306143464	0.000370968687043618	0.0371186384327812	Prkcb	7	121887974	122233625	+	7651	protein_coding	protein kinase C, beta [Source:MGI Symbol;Acc:MGI:97596]	-	136	604	95	153	149	118	99	59	85	102	57	81	0.582838993422887	2.33888031713746	0.522035166035027	0.728625885237944	0.691549741178404	0.559585244558137	0.440085616127311	0.26029716623815	0.424937324401623	0.444598797191706	0.244463129568699
ENSMUSG00000030249	1755.2328293439	1509.85954368859	2818.28058483619	2322.29861793438	2365.97172979304	1646.82323824174	1254.06056163122	1252.40818437671	1426.80236806429	1280.62007220203	1299.80369199289	1766.44070029727	2069.74442397297	1380.0225964274	0.584580771148379	0.000371229216648314	0.0371186384327812	Abcc9	6	142533588	142648041	-	8373	protein_coding	ATP-binding cassette, sub-family C (CFTR/MRP), member 9 [Source:MGI Symbol;Acc:MGI:1352630]	-	1896	1711	2360	2241	2375	1602	1297	1310	1336	1352	1389	1662	7.42480641464375	6.05421975382921	11.850188752806	9.75196496681154	10.0725139936617	6.941988173442	5.26840394695806	5.28111755651922	6.10308645657927	5.38495296174701	5.44349549746268
ENSMUSG00000050822	28.6984270620574	19.4137404799235	23.8837337697982	42.487391046546	11.954383476849	16.4476727914281	2.90067978789026	10.5164046016365	9.61169259923546	4.73602097707853	4.67891897765618	12.7540844786806	23.8142247711004	7.53296690369626	1.66904298726691	0.000378415962159564	0.0371186384327812	Slc29a4	5	142678267	142708245	+	2862	protein_coding	solute carrier family 29 (nucleoside transporters), member 4 [Source:MGI Symbol;Acc:MGI:2385330]	-	31	22	20	41	12	16	3	11	9	5	5	12	0.355156655411255	0.227741571876526	0.293801982811725	0.521970061993706	0.148890494836463	0.202839626484469	0.0356510074433015	0.129735457057225	0.120281001442724	0.0582621743555471	0.057326719271584
ENSMUSG00000042331	842.437697628137	789.78626043325	874.144655974615	659.072700136664	806.92088468731	424.555553928738	217.550984091769	295.41536562779	536.118853868467	552.220045927356	256.404759975558	496.346454295322	732.819625464786	392.342743964377	0.901783892632267	0.00038096969276615	0.0371186384327812	Specc1	11	61847589	62113839	+	14840	protein_coding	sperm antigen with calponin homology and coiled-coil domains 1 [Source:MGI Symbol;Acc:MGI:2442356]	-	910	895	732	636	810	413	225	309	502	583	274	467	2.01064493627985	1.78681009233644	2.07382228153247	1.56154527953936	1.93823519171039	1.009761015593	0.51566635766204	0.702846050797681	1.29387991551958	1.31014983790095	0.605861527387398
ENSMUSG00000017417	189.779920894251	104.128244392317	139.71984255332	93.2650047363204	112.570444406995	113.077750441068	50.2784496567644	91.7795310688278	74.7576091051647	78.6179482195035	49.5965411631555	80.7758683649774	125.423534570712	70.9676579297322	0.822738868579526	0.000383994721101791	0.0371186384327812	Plxdc1	11	97814064	97877270	-	4836	protein_coding	plexin domain containing 1 [Source:MGI Symbol;Acc:MGI:1919574]	-	205	118	117	90	113	110	52	96	70	83	53	76	1.38993810731568	0.72291124039263	1.01717089694414	0.678090381933965	0.829750471689433	0.825294292931148	0.365710334418383	0.670070612402938	0.553650763464646	0.572371648861157	0.35962203223447
ENSMUSG00000042010	1582.11651125988	957.450382759862	3255.3529128235	3642.51657386851	1380.73129157606	1721.86574535263	1038.44336406471	731.368138204722	945.149772258154	1316.61383162783	917.06811962061	1274.34560749484	2090.00556960674	1037.16480554514	1.01067917304824	0.000384186677651988	0.0371186384327812	Acacb	5	114284596	114388822	+	9632	protein_coding	acetyl-Coenzyme A carboxylase beta [Source:MGI Symbol;Acc:MGI:2140940]	-	1709	1085	2726	3515	1386	1675	1074	765	885	1390	980	1199	5.81772892900012	3.33735592957669	11.8988155893081	13.2965883177831	5.10977895178946	6.30958486959206	3.7923463063099	2.68089985790547	3.51439807267709	4.81265400286026	3.3386148078108
ENSMUSG00000037400	1175.70975383268	1310.42748239483	1159.5552745237	1331.61701206857	1136.66262892373	1016.67177442015	822.826166498202	877.641765845666	955.829430701748	983.197954841502	950.756336259735	1047.96060799826	1188.44065436061	939.702043690852	0.339269766529522	0.000387276901856871	0.0371186384327812	Atp11b	3	35808255	35910425	+	9176	protein_coding	ATPase, class VI, type 11B [Source:MGI Symbol;Acc:MGI:1923545]	-	1270	1485	971	1285	1141	989	851	918	895	1038	1016	986	4.53814333917901	4.79470962979148	4.44897721140883	5.10247740099409	4.41557835920929	3.91061746592719	3.15425163435855	3.3769521488246	3.73072971018021	3.77250880644698	3.63326450924494
ENSMUSG00000064127	580.448831222903	815.377100156786	816.823694927099	743.011204399353	704.312426511023	659.962870756052	399.326917466225	483.75461167528	495.536151782806	650.72928225059	525.910493088554	552.676994076161	719.989354662203	517.989075056603	0.47469642125154	0.000390314609115112	0.0371186384327812	Med14	X	12541608	12628312	-	8763	protein_coding	mediator complex subunit 14 [Source:MGI Symbol;Acc:MGI:1349442]	-	627	924	684	717	707	642	413	506	464	687	562	520	2.34607894653273	3.12398127420357	3.28169069935008	2.98124529575413	2.86498240261063	2.65818170903992	1.60294057225558	1.94909647295422	2.02529982025297	2.6145095890638	2.10445778048759
ENSMUSG00000022723	794.298400620815	1036.87023017773	813.24113486163	741.974926568949	923.476123586589	633.235402469981	524.056148345506	500.963273750685	570.293760887971	645.046057078095	639.140332347834	672.777956250404	823.849369714282	592.046254776749	0.477236250425596	0.000390873962435773	0.0371186384327812	Crybg3	16	59311138	59421342	-	12711	protein_coding	beta-gamma crystallin domain containing 3 [Source:MGI Symbol;Acc:MGI:2676311]	-	858	1175	681	716	927	616	542	524	534	681	683	633	2.21327542667199	2.73871859371974	2.25248417962266	2.0524125930431	2.58973527323941	1.75834237459241	1.4502395654703	1.39151277793204	1.60688831854235	1.78670851367787	1.76318425284009
ENSMUSG00000029174	874.839147536912	1184.23816927533	1396.00423884471	677.725701083928	808.913281933452	715.473766427122	538.559547284957	525.820230081826	599.128838685677	731.241638860924	511.873736155586	667.463754384287	942.865717516909	595.681290908876	0.662354106908598	0.000401285542926819	0.0374859576913196	Tbc1d1	5	64313648	64508829	+	7405	protein_coding	TBC1 domain family, member 1 [Source:MGI Symbol;Acc:MGI:1889508]	-	945	1342	1169	654	812	696	557	550	561	772	547	628	4.18441392545894	5.36928819734606	6.6371831887209	3.2179852755936	3.89391370844282	3.41025320438041	2.55829318476795	2.50710923766224	2.89775693387968	3.47679073059566	2.42392387829128
ENSMUSG00000097715	823.922583394552	634.476336593863	620.977078014754	626.948087394154	747.148967303065	561.276834007484	453.47294017351	476.106317419544	570.293760887971	502.018223570324	418.295356602462	546.299951836821	669.124981117978	494.414425081772	0.437747681598529	0.000402007169504429	0.0374859576913196	Gpr137b-ps	13	12629946	12665284	-	5297	transcribed_unprocessed_pseudogene	G protein-coupled receptor 137B, pseudogene [Source:MGI Symbol;Acc:MGI:3710533]	-	890	719	520	605	750	546	469	498	534	530	447	514	5.50919223620455	4.02150098935017	4.1273160553117	4.16156582899074	5.0279001819657	3.7399441665708	3.0113625932276	3.17347440734367	3.85598591976435	3.33681562367208	2.76907209885623
ENSMUSG00000037443	2053.32616850463	2644.68091901503	2012.2045701055	2190.69133347313	2002.35923237221	2107.35807640172	1335.27959569215	1204.60634527837	1943.69783673428	1553.41488048176	934.848011735704	1740.93253133991	2168.43671664537	1452.12986687703	0.578863912593027	0.000417646421655031	0.0381867060863741	Cep85	4	133857169	133914423	-	5269	protein_coding	centrosomal protein 85 [Source:MGI Symbol;Acc:MGI:1917262]	-	2218	2997	1685	2114	2010	2050	1381	1260	1820	1640	999	1638	13.8026106159068	16.8518586155361	13.4451627258499	14.618679728363	13.5463787943021	14.1165350700682	8.91426748535893	8.07194096522025	13.2119628762556	10.3801101738145	6.22148420894736
ENSMUSG00000104913	137.937601040212	158.839694835738	237.643151009492	118.135672666006	113.566643030066	94.5741185507115	64.7818485962157	88.9114207229269	96.1169259923546	80.5123566103349	82.3489740067487	81.8387087382008	143.449480188704	82.4183724444636	0.797742995941711	0.000430553865668266	0.0381867060863741	Gm6560	5	22929576	22931166	-	1591	processed_pseudogene	predicted gene 6560 [Source:MGI Symbol;Acc:MGI:3646204]	-	149	180	199	114	114	92	67	93	90	85	88	77	3.07074661544301	3.35190412456177	5.25868616237034	2.61075452141715	2.54442719302866	2.09807059286088	1.43226970066684	1.97309683235777	2.16369721011361	1.78170196800427	1.81496897660139
ENSMUSG00000033066	476.764191514825	299.148091940639	508.723529296702	456.99852320797	684.388454049608	359.792842312489	266.862540485903	324.096469086798	363.108387082228	296.474913165116	236.753300269402	201.939670912444	464.302605387039	281.539213500315	0.721359850821882	0.000432142805017946	0.0381867060863741	Gas7	11	67345917	67575800	+	8057	protein_coding	growth arrest specific 7 [Source:MGI Symbol;Acc:MGI:1202388]	-	515	339	426	441	687	350	276	339	340	313	253	190	2.09585753566448	1.2465669174343	2.22295459270106	1.9943280286037	3.02788049319934	1.57614848772413	1.16508041005971	1.4202407356127	1.61409729129791	1.29555927419003	1.030395304716
ENSMUSG00000109904	112.942196824871	160.604580333912	175.545443208017	136.78867361327	155.406985199038	119.245627737854	49.3115563941343	86.999347158993	76.8935407938837	107.034074081975	69.2480008693114	116.912441054573	143.422251152827	84.3998267254783	0.765118450895365	0.000434192148795261	0.0381867060863741	Gm45819	7	109719197	109720947	+	1751	TEC	predicted gene 45819 [Source:MGI Symbol;Acc:MGI:5804934]	-	122	182	147	132	156	116	51	91	72	113	74	110	2.28455478767922	3.07945955364031	3.52960043965311	2.74675012049185	3.16368917811847	2.40366695016533	0.990613430123582	1.75424754202263	1.57278915421622	2.15218009818733	1.38676313204914
ENSMUSG00000019866	818.368049124476	1360.72671909282	761.891107256563	792.752540258724	761.095748026056	781.264457592834	477.645271739262	464.633876035941	539.322751401545	661.148528400162	536.204114839398	745.051101629594	879.349770225245	570.667607340984	0.624558849642964	0.000460583514011186	0.039340170387061	Crybg1	10	43826632	44024849	-	7799	protein_coding	crystallin beta-gamma domain containing 1 [Source:MGI Symbol;Acc:MGI:109544]	-	884	1542	638	765	764	760	494	486	505	698	573	701	3.71656076438137	5.85780237543141	3.43934795055113	3.57399451721728	3.47864247033354	3.53571394056047	2.15431006332214	2.10345380824488	2.47671829999833	2.98471464079733	2.41086235230598
ENSMUSG00000031342	727.643989379908	564.763359415956	748.755053683174	826.949708662041	1035.05036937051	705.193970932479	474.744591951372	469.414059945776	513.691571136917	717.033575929689	469.76346535668	471.901125711184	768.059408574012	519.424731671936	0.563889705971235	0.000460838447208416	0.039340170387061	Gpm6b	X	165021907	165171984	+	5600	protein_coding	glycoprotein m6b [Source:MGI Symbol;Acc:MGI:107672]	-	786	640	627	798	1039	686	491	491	481	757	502	444	4.60216740415087	3.38595521408112	4.70732160092935	5.19213805446837	6.58844427789604	4.44465992795765	2.98204125009761	2.95957326535729	3.28534668190645	4.50810648768646	2.94152405066955
ENSMUSG00000027699	193.482943740968	39.7099237089344	134.94309579936	101.555227379549	137.475409983764	114.105729990532	42.5433035557237	44.933728752447	58.7381214397723	89.0371943690763	29.0092976614683	48.8906571682758	120.212055100518	52.1920504911272	1.20328529172887	0.000462556431968803	0.039340170387061	Ect2	3	27151371	27208027	-	5386	protein_coding	ect2 oncogene [Source:MGI Symbol;Acc:MGI:95281]	-	209	45	113	98	138	111	44	47	55	94	31	46	1.27235362102156	0.247534323346536	0.882076903576018	0.662965751803441	0.909846427135631	0.74775457460127	0.277847509922025	0.294555501984869	0.390589438402012	0.582033280450209	0.188865250175027
ENSMUSG00000054115	96.2785940146443	123.54198487224	97.9233084561727	89.1198934147062	93.6426705686508	74.0145275614264	60.9142755456954	69.7906850835878	70.4857457277267	57.779455920358	54.2754601408116	63.7704223934032	95.7534964813068	62.8360074685971	0.61165690554745	0.000471893972564691	0.0396395436496571	Skp2	15	9112073	9155512	-	7874	protein_coding	S-phase kinase-associated protein 2 [Source:MGI Symbol;Acc:MGI:1351663]	-	104	140	82	86	94	72	63	73	66	61	58	60	0.43307770027059	0.526771035972743	0.437837341466769	0.397955405250484	0.423923800322411	0.331771850329372	0.272123044114466	0.312941442505112	0.320606763815073	0.25835730056744	0.241707038156105
ENSMUSG00000033417	1152.56586104069	1035.10534467956	1269.42044986478	1113.99866768383	1138.65502616987	1033.11944721158	784.150435992999	868.081398025996	978.256713433298	905.527210817414	830.976010431737	1017.13823717478	1123.81079944172	897.355000979371	0.324652975281805	0.000474523912820813	0.0396395436496571	Cacul1	19	60513134	60569463	-	6772	protein_coding	CDK2 associated, cullin domain 1 [Source:MGI Symbol;Acc:MGI:1926082]	-	1245	1173	1063	1075	1143	1005	811	908	916	956	888	957	6.02809787452523	5.13180712175504	6.59949450029539	5.78392805106009	5.99355696842018	5.38457662113799	4.07309074909003	4.52589557687782	5.17371712171413	4.70790029277408	4.30281555384179
ENSMUSG00000005893	231.438927919818	292.970992697027	192.264056846876	416.583687822231	272.958422721387	251.854989618743	141.166416343992	125.240818437671	99.3208235254331	206.490514600624	167.505299400091	215.756595764348	276.345179604347	159.246744678693	0.795471385822752	0.000478880719845331	0.0396395436496571	Nr2c2	6	92068371	92151275	+	14935	protein_coding	nuclear receptor subfamily 2, group C, member 2 [Source:MGI Symbol;Acc:MGI:1352466]	RXR-like	250	332	161	402	274	245	146	131	93	218	179	203	0.548861382003203	0.658600595708448	0.453226197669743	0.980736171548656	0.651479407235891	0.595200526007051	0.332481748961018	0.296074973556983	0.238178127664353	0.486785440578715	0.393282405482343
ENSMUSG00000018507	556.379182719242	403.276336332956	471.703741953515	369.951185454071	497.103112912306	487.262306446057	348.081574546831	335.568910470402	387.671601502497	327.732651613834	203.065083630278	234.887722482369	464.279310969691	306.167924041035	0.600927694529932	0.000496561597890846	0.0403213854684618	Trpv2	11	62465312	62491341	+	4485	protein_coding	transient receptor potential cation channel, subfamily V, member 2 [Source:MGI Symbol;Acc:MGI:1341836]	-	601	457	395	357	499	474	360	351	363	346	217	221	4.39379628884809	3.01886029259908	3.70278933722215	2.90026135530944	3.95087650529091	3.83458477164594	2.72998483753121	2.64168055563637	3.09576747392182	2.57276408829116	1.58764719333308
ENSMUSG00000073568	149.046669580363	34.4152672144098	121.807042225971	124.353339648427	72.722499484165	84.2943230560689	11.602719151561	33.4612873688435	80.0974383269622	37.8881678166282	14.9725407284998	17.0054459715742	97.7731902015674	32.5045998940115	1.59075840443867	0.000498529251605889	0.0403213854684618	Arl14epl	18	47054882	47067299	+	2257	protein_coding	ADP-ribosylation factor-like 14 effector protein-like [Source:MGI Symbol;Acc:MGI:2685795]	-	161	39	102	120	73	82	12	35	75	40	16	16	2.33895685099703	0.511943826674871	1.90004098427847	1.937229411923	1.14854140910511	1.3182104259493	0.180829744444358	0.523446277577727	1.27102431741646	0.591037104140277	0.232618974646378
ENSMUSG00000025314	698.019806606171	420.042748565617	693.822466012638	786.534873276302	782.015919110542	611.647831931232	459.27429974929	329.8326897786	551.0703756895	415.822641787495	380.864004781213	496.346454295322	665.347274250417	438.86841101357	0.600463314373366	0.000499284973566501	0.0403213854684618	Ptprj	2	90260098	90410939	-	8300	protein_coding	protein tyrosine phosphatase, receptor type, J [Source:MGI Symbol;Acc:MGI:104574]	-	754	476	581	759	785	595	475	345	516	439	407	467	2.97866146222856	1.69909680321059	2.94301446182505	3.33192372296892	3.3585121288578	2.60100580982031	1.94641614734121	1.40306125896751	2.37791192346188	1.76389505010717	1.60906293291557
ENSMUSG00000004328	113.86795253655	132.366412363115	128.97216235691	307.774515629857	167.361368675887	265.218723761778	33.841264192053	49.7139126622817	79.0294724826027	107.034074081975	60.8259467095303	146.671971504827	185.92685588735	79.5194402722116	1.22646693138295	0.000502387339764065	0.0403213854684618	Hif3a	7	16765432	16796352	-	6710	protein_coding	hypoxia inducible factor 3, alpha subunit [Source:MGI Symbol;Acc:MGI:1859778]	bHLH	123	150	108	297	168	258	35	52	74	113	65	138	0.601049837881845	0.662304950593364	0.676699088518427	1.61274348542589	0.889082615068167	1.39508167695255	0.177404938678366	0.261587178716765	0.42182600982864	0.561619575547841	0.317868542059397
ENSMUSG00000034738	194.408699452647	248.848855242655	118.224482160501	148.187729747709	103.604656799358	134.665320979817	75.4176744851466	109.9442299262	104.660652747231	91.8788069553234	77.6700550290925	89.2785913507645	157.989957397115	91.4750017489596	0.791778027575321	0.000516870020726845	0.041240366241396	Nostrin	2	68966144	69019674	+	1888	protein_coding	nitric oxide synthase trafficker [Source:MGI Symbol;Acc:MGI:3606242]	-	210	282	99	143	104	131	78	115	98	97	83	84	3.64707922763929	4.42523542942011	2.20458861774122	2.75972250144579	1.9560804205104	2.51751318991029	1.40511799039775	2.05603962737117	1.98540102169547	1.71338932961238	1.44255644661946
ENSMUSG00000105135	158.304226697155	140.308397104901	134.94309579936	183.42117598143	143.452601722189	118.217648188389	78.3183542730369	121.416671309803	114.272345346466	69.1459062653465	86.0921091888736	99.9069950829984	146.441190915571	94.8587302444208	0.628488213638355	0.000534423374445219	0.0419245821600021	Gm43667	3	34108484	34109578	-	1095	TEC	predicted gene 43667 [Source:MGI Symbol;Acc:MGI:5663804]	-	171	159	113	177	144	115	81	127	107	73	92	94	5.12047068704019	4.30201843980855	4.33869059603693	5.88966393104799	4.66985858873378	3.81053688726217	2.51588671157414	3.91494109741949	3.73760854346129	2.22328457340768	2.75695972439912
ENSMUSG00000021998	5467.51323317778	2199.04733072588	3869.16487070731	3026.9675426088	4656.2323642327	2572.00483275957	1737.50719294626	1676.88851557004	3151.56720670487	2435.26198641378	1267.05125914929	1721.80140462189	3631.82169570201	1998.34626090102	0.86195418299842	0.000536000629087194	0.0419245821600021	Lcp1	14	75368541	75468282	+	9504	protein_coding	lymphocyte cytosolic protein 1 [Source:MGI Symbol;Acc:MGI:104808]	-	5906	2492	3240	2921	4674	2502	1797	1754	2951	2571	1354	1620	20.3758112103226	7.76838735722211	14.3328626387583	11.198413415664	17.4637552849803	9.55175834857937	6.4307530301278	6.22958035069925	11.8764579978828	9.0215666638749	4.67486366859933
ENSMUSG00000027962	1583.04226697155	1355.43206259829	1339.87746448568	1704.67703101386	1449.46899656795	1311.70190511639	930.151318650142	979.93770151613	1286.89884245319	1062.76310725642	883.379902981486	1312.60786093088	1457.36662112562	1075.95645563138	0.438277118819683	0.000536279298900473	0.0419245821600021	Vcam1	3	115903598	115923337	-	8870	protein_coding	vascular cell adhesion molecule 1 [Source:MGI Symbol;Acc:MGI:98926]	-	1710	1536	1122	1645	1455	1276	962	1025	1205	1122	944	1235	6.32121240395604	5.1304665250564	5.31818686772057	6.75730698755946	5.82498391115133	5.21950722966566	3.68868554442785	3.9006400538098	5.1962206248971	4.21847569001705	3.49224808577628
ENSMUSG00000049130	1420.109261716	412.983206572918	945.79585728401	768.918150159442	1257.20266231529	710.333868679801	369.353226324692	409.183742681857	812.722007557576	495.387794202414	294.771895592339	381.559693987196	919.223834454577	460.496393391012	0.997501201355644	0.000545078363424152	0.0419303587533045	C5ar1	7	15980668	15993465	-	2570	protein_coding	complement component 5a receptor 1 [Source:MGI Symbol;Acc:MGI:88232]	-	1534	468	792	742	1262	691	382	428	761	523	315	359	19.5713205159442	5.39513097340942	12.9564616662893	10.5196707936802	17.4373943071372	9.75545147373536	5.05534059943482	5.62142312790411	11.3259773490802	6.78664104217246	4.0219266322888
ENSMUSG00000031608	371.228040383388	525.053435707021	330.789712711705	226.94484485838	303.84058003658	203.539950793923	176.941467061306	178.778878227821	221.068929782416	231.117823681432	180.606272537528	184.934224940869	326.899427415166	195.574599371895	0.74239874738712	0.000547467914037811	0.0419303587533045	Galnt7	8	57976862	58106066	-	5253	protein_coding	polypeptide N-acetylgalactosaminyltransferase 7 [Source:MGI Symbol;Acc:MGI:1349449]	-	401	595	277	219	305	198	183	187	207	244	193	174	2.50302314169226	3.35582130845419	2.21700526481613	1.51903605148413	2.0618059814661	1.36760360957682	1.18485135759879	1.20162743720964	1.50725627279054	1.54906178158616	1.20560938957425
ENSMUSG00000031647	357.341704708199	1244.24427621328	380.945553628282	414.511132161424	344.684723582481	360.820821861954	211.749624515989	239.965232273706	257.379768490638	304.999750923857	200.257732243684	285.904060397091	517.091368692603	250.042694807494	1.04911396182273	0.000549416585128548	0.0419303587533045	Mfap3l	8	61085861	61129763	+	6837	protein_coding	microfibrillar-associated protein 3-like [Source:MGI Symbol;Acc:MGI:1918556]	-	386	1410	319	400	346	351	219	251	241	322	214	269	1.8511841273799	6.11002229833638	1.96164068058712	2.13169849481264	1.79707364697964	1.86270459321057	1.08942846001159	1.23920675472419	1.34826610919518	1.57063982588256	1.02708150062391
ENSMUSG00000078942	162.933005255552	622.122138106639	101.505868521642	110.881727853181	179.315752152736	118.217648188389	59.9473822830653	47.8018390983478	88.6411650818381	121.24213701321	72.0553522559051	87.1529106043177	215.82935667969	79.4734643894474	1.44306444333489	0.00054989746281548	0.0419303587533045	Naip6	13	100417629	100454182	-	6827	protein_coding	NLR family, apoptosis inhibitory protein 6 [Source:MGI Symbol;Acc:MGI:1298222]	-	176	705	85	107	180	115	62	50	83	128	77	82	0.845299589440949	3.05948604465548	0.52345985321963	0.571064603473941	0.936263211268399	0.611181762348334	0.308874438004453	0.247215519992662	0.465020763450893	0.625268255594366	0.370098679735054
ENSMUSG00000050511	3.70302284671709	65.3007634324699	7.16512013093947	0	1.99239724614151	0	0	0	0	0	0	1.06284037322339	13.0268839427113	0.177140062203898	5.68616432927365	0.000569379805692454	1	Oprd1	4	131838037	131871797	-	4021	protein_coding	opioid receptor, delta 1 [Source:MGI Symbol;Acc:MGI:97438]	-	4	74	6	0	2	0	0	0	0	0	0	1	0.0326177358476711	0.54523899555273	0.0627352356235133	0	0.017662463575477	0	0	0	0	0	0
ENSMUSG00000092009	71.2831897993039	22.9435114762732	53.738400982046	22.7981122688783	42.8365407920424	31.8673660333919	6.76825283841059	18.1646988573722	18.1554193541114	20.8384922991455	5.61470277318741	20.1939670912444	40.9111868919893	14.9559222022452	1.45463419458909	0.00059577920865602	0.0445510452695002	Myh15	16	48877849	49019467	+	6340	protein_coding	myosin, heavy chain 15 [Source:MGI Symbol;Acc:MGI:3643515]	-	77	26	45	22	43	31	7	19	17	22	6	19	0.398225769714053	0.121499181577832	0.298412912983612	0.126434265535784	0.240843291765828	0.177408688298059	0.0375516447486384	0.10115793925807	0.102561371261729	0.11572301407327	0.0310540827549414
ENSMUSG00000026469	1367.34118615028	1195.70992501347	1417.49959923752	1153.37722523916	1291.0734154997	1038.2593449589	852.799857639735	837.488221003054	984.664508499455	988.881180013996	851.563253933424	1159.55884718672	1243.87678268317	945.825978046063	0.395413282274983	0.000598867810491519	0.0445667059547991	Xpr1	1	155151447	155293161	-	17880	protein_coding	xenotropic and polytropic retrovirus receptor 1 [Source:MGI Symbol;Acc:MGI:97932]	-	1477	1355	1187	1113	1296	1010	882	876	922	1044	910	1091	2.70857505174536	2.24523106862133	2.79111390714792	2.26808338420789	2.57390695704538	2.04953957322615	1.67772683954152	1.65375900556057	1.97236624714769	1.9472391733537	1.67005429759842
ENSMUSG00000028417	10.183312828472	3.52977099634972	31.0488539007377	12.4353339648427	8.96578760763678	17.4756523408923	2.90067978789026	3.82414712786783	4.27186337743798	2.84161258624712	3.74313518212494	1.06284037322339	13.9397852731552	3.10737973913192	2.1481547726373	0.000602109899560502	1	Tal2	4	53779705	53788712	+	2971	protein_coding	T cell acute lymphocytic leukemia 2 [Source:MGI Symbol;Acc:MGI:99540]	bHLH	11	4	26	12	9	17	3	4	4	3	4	1	0.121399787468726	0.0398883986849005	0.367929874536958	0.147166838866045	0.107571002075553	0.20761021514169	0.0343430438582056	0.0454457180744504	0.0514969484466996	0.0336747915864508	0.044178814016903
ENSMUSG00000120160	12.9605799635098	17.6488549817486	28.6604805237579	18.6530009472641	15.9391779691321	22.6155500882136	4.83446631315042	4.78018390983478	7.47576091051647	13.2608587358199	6.55048656871864	6.37704223934032	19.4129407456043	7.21313311289675	1.41846536286284	0.000616621890608728	1	ENSMUSG00000120160	3	138781209	138782153	+	945	lncRNA	novel transcript	-	14	20	24	18	16	22	5	5	7	14	7	6	0.485762651272168	0.627028743348356	1.06776034896147	0.694020124239715	0.601233998196765	0.844682158860324	0.179952704237617	0.178596862961894	0.283328581176193	0.494063238535039	0.243065289711516
ENSMUSG00000112640	35.1787170438123	57.358778690683	47.7674675395965	32.1246127425104	28.8897600690519	19.5316114398209	13.5365056768212	13.3845149475374	11.7476242879545	16.102471322067	19.6514597061559	24.4453285841379	36.8084912542458	16.4779840874456	1.16165125100333	0.000638937803872956	0.0464324801227676	Gm32687	10	81699768	81716915	+	2379	protein_coding	predicted gene, 32687 [Source:MGI Symbol;Acc:MGI:5591846]	zf-C2H2	38	65	40	31	29	19	14	14	11	17	21	23	0.523741572304797	0.809483828503001	0.706903131405764	0.474786781084546	0.432871419729465	0.289775462614871	0.200149161585849	0.198641151491035	0.176857058867863	0.238309191348868	0.289655357852942
ENSMUSG00000112023	1893.17043038411	495.932824987136	1231.2064758331	982.391383222575	1405.63625715283	866.586760198367	459.27429974929	470.370096727743	973.98485005586	679.145408113061	438.882600104149	509.100538774002	1145.82068862969	588.459632254018	0.96154331054404	0.000646735399987944	0.0467028319508171	Lilrb4b	10	51356728	51362799	+	5439	protein_coding	leukocyte immunoglobulin-like receptor, subfamily B, member 4B [Source:MGI Symbol;Acc:MGI:102702]	-	2045	562	1031	948	1411	843	475	492	912	717	469	479	12.3282702656705	3.06130442457141	7.96955299068007	6.35068607895029	9.21219901435898	5.62355522926753	2.97026181704947	3.05338574978868	6.41357141283562	4.39629078635771	2.82950520648734
ENSMUSG00000078249	102.758883996399	96.1862596505299	47.7674675395965	58.0315585025994	75.7110953533773	55.5108956710698	28.0399046162725	35.3733609327774	49.1264288405368	39.7825762074596	24.3303786838121	51.0163379147226	72.6610267855953	37.9448311992635	0.945941428199911	0.000648692348951849	0.0467028319508171	Hmga1b	11	120653620	120655245	+	1626	protein_coding	high mobility group AT-hook 1B [Source:MGI Symbol;Acc:MGI:96161]	HMGA	111	109	40	56	76	54	29	37	46	42	26	48	2.23836203238421	1.98607305376991	1.03426971070991	1.25487033534118	1.65977190000352	1.20496842688813	0.60659334066813	0.768098316539069	1.08208517165078	0.861420222169026	0.524698134617111
ENSMUSG00000040855	619.330571113433	935.389314032676	665.161985488881	654.92758881505	596.722975219381	399.884044741595	233.02127629385	278.206703552384	546.798512312062	477.390914489515	220.844975745371	393.250938092653	645.236079901836	358.252220080973	0.849598340623912	0.000663417677748392	0.0475115520486704	Reps2	X	161194950	161426645	-	8296	protein_coding	RALBP1 associated Eps domain containing protein 2 [Source:MGI Symbol;Acc:MGI:2663511]	-	669	1060	557	632	599	389	241	291	512	504	236	370	2.64414500058136	3.78552731564639	2.82280454476607	2.77574586816222	2.56397293009636	1.70130942079342	0.988026244614178	1.18402228375617	2.36061614403309	2.02604042610439	0.933469157450447
ENSMUSG00000098888	9.25755711679272	7.05954199269945	11.9418668848991	38.3422797249317	11.954383476849	10.2797954946426	0	1.91207356393391	4.27186337743798	0	0	6.37704223934032	14.8059041151358	2.0934965301187	2.85395413748868	0.000678940452330264	1	Gm18486	9	76776468	76776765	-	298	processed_pseudogene	predicted gene, 18486 [Source:MGI Symbol;Acc:MGI:5010671]	-	10	8	10	37	12	10	0	2	4	0	0	6	1.10030130741179	0.795358607334492	1.41084106511268	4.52393990381089	1.42994830946966	1.21754826132246	0	0.226542329528846	0.513414207500485	0	0
ENSMUSG00000061175	877.61641467195	646.830535081087	710.541079651497	819.695763849216	938.41910293265	670.242666250695	468.943232375591	467.501986381842	714.469149876503	623.260360583534	469.76346535668	556.928355569055	777.224260406182	550.144425023867	0.499094632459175	0.000694341706766736	0.0491772631304999	Fnip2	3	79363281	79475103	-	8698	protein_coding	folliculin interacting protein 2 [Source:MGI Symbol;Acc:MGI:2683054]	-	948	733	595	791	942	652	485	489	669	658	502	524	3.57368959012486	2.49674295864714	2.87602011100401	3.31351123354389	3.8458014260087	2.71976036999206	1.89645489008291	1.89768920117282	2.94192007460657	2.52285798339087	1.89383015448948
ENSMUSG00000031529	1378.45025469044	1426.02748252529	1444.96589307279	1618.66597109036	1431.53742135267	1363.1008825896	1111.9272520246	1254.32025794065	1224.95682348034	1276.83125542037	1169.72974441404	1275.40844786806	1443.79131755353	1218.86229685801	0.244279677914224	0.000695992124973066	0.0491772631304999	Tnks	8	35293614	35432844	-	14888	protein_coding	tankyrase, TRF1-interacting ankyrin-related ADP-ribose polymerase [Source:MGI Symbol;Acc:MGI:1341087]	-	1489	1616	1210	1562	1437	1326	1150	1312	1147	1348	1250	1200	3.27933837135528	3.21583871084814	3.41698731366422	3.8227512283905	3.42748659306686	3.23154057203821	2.62713059282953	2.97463103942336	2.94680374477617	3.01953345474901	2.7550555910007
ENSMUSG00000026628	840.586186204779	562.998473917781	620.977078014754	366.84235196286	784.008316356683	497.5421019407	299.736911415326	321.228358740897	593.78900946388	313.524588682598	166.56951560456	192.374107553433	612.159084732926	314.537081910116	0.961238542617322	0.000698946824000903	0.0491772631304999	Atf3	1	190902493	190950236	-	2154	protein_coding	activating transcription factor 3 [Source:MGI Symbol;Acc:MGI:109384]	TF_bZIP	908	638	520	354	787	484	310	336	556	331	178	181	13.8219094226886	8.77534586007793	10.1496718407549	5.98809842571732	12.9743135726818	8.15271220181344	4.8948138074661	5.26537380943924	9.87309345547125	5.1247019066709	2.71163366377332
ENSMUSG00000019979	513.794419981996	352.977099634972	486.033982215394	442.49063358232	548.905441311985	385.492331049096	318.107883405298	318.360248394997	391.943464879935	324.891039027587	291.964544205745	348.611642417271	454.948984629294	332.313137055139	0.453419550086049	0.000713319785112705	0.0497363826745926	Apaf1	10	90825173	90918632	-	9028	protein_coding	apoptotic peptidase activating factor 1 [Source:MGI Symbol;Acc:MGI:1306796]	-	555	400	407	427	551	375	329	333	367	343	312	328	2.0157159197257	1.31267647865351	1.89538402108171	1.72332699768983	2.16728190553739	1.50710033454569	1.23943720671237	1.24505436023845	1.55488641497281	1.26703579200072	1.13401750140109
ENSMUSG00000101389	204.592012281119	113.835114632279	185.098936715936	272.541069396136	224.14469019092	148.029055122853	40.6095170304636	94.6476414147287	178.350296008036	98.5092363232334	58.9543791184678	77.5873472453073	191.373479723207	91.4430695233727	1.06667261826255	0.000721003470771834	0.0497431577539628	Ms4a4a	19	11352887	11370154	+	836	protein_coding	membrane-spanning 4-domains, subfamily A, member 4A [Source:MGI Symbol;Acc:MGI:3643932]	-	221	129	155	263	225	144	42	99	167	104	63	73	8.66789994061313	4.57164706685893	7.7950656456405	11.4625393127271	9.55722031000203	6.2496927021375	1.70868967253374	3.99727978813398	7.64072112753263	4.14871284033011	2.47281135047422
ENSMUSG00000024413	1449.73344448974	1050.98931416313	1192.99250180142	1147.15955825674	1360.80731911465	1057.79095639872	866.336363316556	899.630611830906	1114.95634151131	903.632802426583	857.177956706611	942.739411049144	1209.91218237073	930.745581140186	0.37887781123755	0.000729397045382314	0.0499572427675789	Npc1	18	12322749	12369457	-	11317	protein_coding	NPC intracellular cholesterol transporter 1 [Source:MGI Symbol;Acc:MGI:1097712]	-	1566	1191	999	1107	1366	1029	896	941	1044	954	916	887	4.5372042990832	3.11795403152275	3.71132108125983	3.56408187421593	4.28622278017727	3.29903184543998	2.692755213079	2.80668670857205	3.52852613156956	2.81127527131429	2.65595597116958
ENSMUSG00000027340	1228.47782939839	2844.11298030879	1003.11681833153	946.12165915845	1017.11879415524	999.196122079256	700.030722144181	705.555145091614	701.653559744189	753.027335355486	760.792225766894	869.403425296731	1339.69070057194	748.410402233182	0.840415717332007	0.000749014975236007	0.0505157453383235	Slc23a2	2	131894416	131987028	-	7951	protein_coding	solute carrier family 23 (nucleobase transporters), member 2 [Source:MGI Symbol;Acc:MGI:1859682]	-	1327	3223	840	913	1021	972	724	738	657	795	813	818	5.47239027557242	12.0095798617916	4.44172727228029	4.18389128475917	4.55994227919568	4.43554470106426	3.09696997070288	3.13307101492277	3.16058715978147	3.33450742521526	3.35525479465318
ENSMUSG00000021500	1702.46475377818	1628.10687206631	1561.9961885448	1531.61863333646	1581.96341343636	1547.1092219437	1304.33901128798	1306.90228094883	1250.58800374497	1512.68510007888	1369.98747665773	1387.00668705652	1592.2098471843	1355.25142662915	0.232572447455657	0.000753461460600865	0.0505157453383235	Ddx46	13	55782840	55829069	+	7295	protein_coding	DEAD box helicase 46 [Source:MGI Symbol;Acc:MGI:1920895]	-	1839	1845	1308	1478	1588	1505	1349	1367	1171	1597	1464	1305	8.26578921302844	7.49307943623333	7.53835878990926	7.38210987530921	7.73001894905721	7.48537655545595	6.28936551406814	6.32526679992103	6.13982162511837	7.30072405153953	6.58525344188952
ENSMUSG00000121093	446.214253029409	457.105344027289	450.208381560697	501.558469915323	426.373010674283	460.534838159986	285.233512475875	357.557756455642	355.632626171712	411.086620810416	378.99243719015	366.679928762069	456.999049561164	359.197146977644	0.347158785492871	0.000753868930367125	0.0505157453383235	ENSMUSG00000121093	17	21695173	21698393	+	3221	lncRNA	novel transcript	-	482	518	377	484	428	448	295	374	333	434	405	345	4.90664013012729	4.76462030668199	4.92090500779724	5.47502370597055	4.71854825579524	5.0464937311268	3.11495281737608	3.91937219972818	3.95437328990244	4.49350592141694	4.12592198540116
ENSMUSG00000046834	12.0348242518305	67.9480916797322	0	1.03627783040356	1.99239724614151	1.02797954946426	0	0	0	1.89440839083141	0	0	14.0065950929287	0.315734731805235	5.31086144704253	0.000771283032635162	1	Krt1	15	101753861	101759229	-	4415	protein_coding	keratin 1 [Source:MGI Symbol;Acc:MGI:96698]	-	13	77	0	1	2	1	0	0	0	2	0	0	0.0965473899187605	0.516712871005019	0	0.0082527874343341	0.0160862437229882	0.00821810604471334	0	0	0	0.0151072564444463	0
ENSMUSG00000071266	263.840377828592	286.793893453415	247.196644517412	223.836011367169	229.125683306273	207.65186899178	180.809040111826	192.163393175358	175.146398474957	191.335247473972	184.349407719653	193.436947926656	243.074079910773	186.206739147071	0.386009828076317	0.00077350713829511	0.051386768213176	Zfp946	17	22643203	22675670	+	3504	protein_coding	zinc finger protein 946 [Source:MGI Symbol;Acc:MGI:1921399]	zf-C2H2	285	325	207	216	230	202	187	201	164	202	197	182	2.66691181616676	2.7479480993274	2.48370838877114	2.24605827878949	2.33087559767528	2.09165340007326	1.81508802108165	1.93627746206033	1.79020969955506	1.92253203693643	1.84484057644914
ENSMUSG00000046727	350.861414726444	912.445802556403	865.785349155186	279.795014208961	361.620100174684	388.576269697489	264.928753960643	201.723760995028	258.447734334998	262.37556213015	217.101840563247	384.748215106866	526.513991753194	264.887644515155	0.991297763961519	0.00078494769533907	0.0515519843987722	Cystm1	18	36475573	36536150	+	4261	protein_coding	cysteine-rich transmembrane module containing 1 [Source:MGI Symbol;Acc:MGI:1913310]	-	379	1034	725	270	363	378	274	211	242	277	232	362	2.9164569411336	7.18949302966416	7.15353701285131	2.30878555763857	3.02517461528144	3.21871641277652	2.18705250918781	1.67150065666683	2.17234094039574	2.16797639110746	1.78662400229164
ENSMUSG00000030760	495.27930574841	607.120611372152	414.382780905999	370.987463284475	438.327394151132	326.897496729633	299.736911415326	314.536101267129	316.117889930411	356.148777476305	264.82681413534	303.972346741889	442.165842031967	309.223140161067	0.517243897182734	0.000785985420124701	0.0515519843987722	Acer3	7	97855596	97970415	-	15324	protein_coding	alkaline ceramidase 3 [Source:MGI Symbol;Acc:MGI:1913440]	-	535	688	347	358	440	318	310	329	296	376	283	286	1.14474704672841	1.33016512586586	0.952032309965033	0.851220845411475	1.01961423441258	0.752934895823296	0.688033734095666	0.724701875217538	0.738828641594929	0.818280148395934	0.605997741675051
ENSMUSG00000032854	5.55453427007563	29.1206107198852	54.9325876705359	16.580445286457	9.96198623070754	3.08393864839277	2.90067978789026	0	0	2.84161258624712	3.74313518212494	7.43988261256371	19.872350471009	2.82088502813767	2.81628161880467	0.000794846148633233	1	Ugt8a	3	125658920	125732268	-	4536	protein_coding	UDP galactosyltransferase 8A [Source:MGI Symbol;Acc:MGI:109522]	-	6	33	46	16	10	3	3	0	0	3	4	7	0.0433716652921579	0.215541130525997	0.426362639342253	0.128522245229577	0.0782856768485371	0.0239966522403501	0.0224940880297021	0	0	0.0220563945774571	0.0289363440132757
ENSMUSG00000027698	1272.914103559	428.867176056491	1030.58311216679	580.315585025994	1087.84889639326	572.58460905159	410.929636617786	348.953425417939	704.857457277267	458.446830581201	371.5061668259	378.371172867526	828.852247042188	445.510781597937	0.895798955585658	0.000795891470470556	0.051981451778117	Nceh1	3	27237114	27338757	+	5253	protein_coding	neutral cholesterol ester hydrolase 1 [Source:MGI Symbol;Acc:MGI:2443191]	-	1375	486	863	560	1092	557	425	365	660	484	397	356	8.58268533622656	2.74105740488863	6.90713192612389	3.88429309968544	7.38194141560977	3.84724853805198	2.75170397256551	2.34542253786908	4.80574463788289	3.07272910773648	2.47993226767347
ENSMUSG00000032220	1620.99825115041	1002.45496296332	927.883056956661	697.414979861596	1177.50677246963	825.467578219797	746.441598750426	675.918004850638	847.964880421439	503.912631961155	613.87416986849	511.226219520449	1041.9542669369	649.889584228766	0.681421279173472	0.000804564732025967	0.0520094967136768	Myo1e	9	70114632	70307048	+	5704	protein_coding	myosin IE [Source:MGI Symbol;Acc:MGI:106621]	-	1751	1136	777	673	1182	803	772	707	794	532	656	481	10.0654807434232	5.90048997685245	5.72711439801158	4.29899474749294	7.35856815004607	5.10785402603256	4.60318007887487	4.18384442839362	5.32433215572864	3.11041565494272	3.77381873366968
ENSMUSG00000022637	794.298400620815	668.009161059185	794.134147845791	997.935550678628	796.958898456603	853.223026055332	486.347311102933	503.831384096586	636.507643238259	697.142287825959	591.415358775741	699.348965580989	817.426530786059	602.432158436744	0.440284794477742	0.000806400879338615	0.0520094967136768	Cblb	16	51851588	52028411	+	10475	protein_coding	Casitas B-lineage lymphoma b [Source:MGI Symbol;Acc:MGI:2146430]	-	858	757	665	963	800	830	503	527	596	736	632	658	2.68572257264226	2.14107120279426	2.66908232814682	3.34968233233884	2.71201015893052	2.87492493513602	1.63318030871194	1.69821320683471	2.17628808032807	2.34320397999243	1.97979288956435
ENSMUSG00000101940	5.55453427007563	3.52977099634972	4.77674675395965	11.3990561344392	7.96958898456603	14.3917136924996	0	0	0	2.84161258624712	1.87156759106247	1.06284037322339	7.93690180531496	0.962670091755495	3.01895584493483	0.000808636965189589	1	Akp-ps1	1	86995394	86998820	+	2075	transcribed_unprocessed_pseudogene	alkaline phosphatase pseudogene 1 [Source:MGI Symbol;Acc:MGI:87981]	-	6	4	4	11	8	14	0	0	0	3	2	1	0.0948115054290256	0.0571124975869105	0.0810468698609308	0.193154998432981	0.136907500794203	0.244800546806618	0	0	0	0.0482158100257086	0.0316277726371612
ENSMUSG00000046138	428.624894507503	601.825954877628	468.121181888045	448.708300564742	450.281777627981	342.317189971597	356.783613910501	327.920616214666	301.166368109378	316.366201268846	319.102274276151	379.434013240749	456.646549906249	333.462181170048	0.454437987966451	0.000813500123541517	0.0522496614618221	9930021J03Rik	19	29691802	29783389	-	8134	protein_coding	RIKEN cDNA 9930021J03 gene [Source:MGI Symbol;Acc:MGI:2444398]	-	463	682	392	433	452	333	369	343	282	334	341	357	1.86639995806288	2.4841022547368	2.02617174652327	1.93961304085067	1.97328413134502	1.48539690391042	1.54291634450893	1.42339548011196	1.32607807786792	1.36939460447166	1.37564674352959
ENSMUSG00000036499	980.375298668349	1112.76030659925	1114.17618036109	1164.7762813736	1150.60940964672	940.601287759794	817.024806922422	893.894391139104	812.722007557576	968.042687714851	893.673524732329	901.288636493432	1077.2164607348	881.107675759952	0.289536960606246	0.0008385095965392	0.0528028440204898	Eea1	10	95776512	95881380	+	9592	protein_coding	early endosome antigen 1 [Source:MGI Symbol;Acc:MGI:2442192]	-	1059	1261	933	1124	1155	915	845	935	761	1022	955	848	3.62005095074675	3.89488983980063	4.08946814738885	4.26961296198765	4.27590621208959	3.46110179748536	2.99617875628322	3.29031949940692	3.03458734227859	3.55326861033566	3.26701339408437
ENSMUSG00000069793	348.084147591406	224.140458268207	244.808271140432	234.198789671205	278.935614459811	196.344093947673	198.213118839167	152.965885114713	119.612174568263	208.384922991455	168.441083195622	162.614577103178	254.418562513122	168.371960302067	0.595088711119072	0.000839382598849677	0.0528028440204898	Slfn9	11	82869216	82882656	-	5965	protein_coding	schlafen 9 [Source:MGI Symbol;Acc:MGI:2445121]	-	376	254	205	226	280	191	205	160	112	220	180	153	2.06683253801972	1.26157342217859	1.4448999273719	1.38047758157657	1.66687464294703	1.16178393860774	1.16886295485104	0.905409746180667	0.718177392688021	1.22998140691456	0.990190534784551
ENSMUSG00000005506	2507.87222293915	2424.07023174317	2599.74442084254	2996.9154855271	2312.17700414722	2650.13127851885	2046.91303698789	2184.5440467945	2234.18454640006	2125.52621451284	2020.35721455194	2284.04396205706	2581.81844061967	2149.26150355071	0.264510483485051	0.000842580429812067	0.0528028440204898	Celf1	2	90770727	90849842	+	8446	protein_coding	CUGBP, Elav-like family member 1 [Source:MGI Symbol;Acc:MGI:1342295]	-	2709	2747	2177	2892	2321	2578	2117	2285	2092	2244	2159	2149	10.5168534223302	9.63600118570417	10.8368162162869	12.476092287866	9.75841806605852	11.0747590157638	8.52491313647001	9.1321020865544	9.47403006106802	8.86049712774123	8.38799723724451
ENSMUSG00000041498	41.6590070255672	21.1786259780983	34.6314139662074	20.7255566080712	81.6882870918018	38.0352433301775	7.73514610104068	10.5164046016365	24.5632144202684	23.6801048853926	8.42205415978112	5.31420186611694	39.6530223333206	13.3718543390394	1.56943658855236	0.000878649533133003	0.054402464493463	Kif14	1	136394081	136459249	+	10358	protein_coding	kinesin family member 14 [Source:MGI Symbol;Acc:MGI:1098226]	-	45	24	29	20	82	37	8	11	23	25	9	5	0.142450671291679	0.0686474797216679	0.117710836886501	0.0703534592056093	0.281121008642277	0.129606942743208	0.0262684387726663	0.0358469664122203	0.0849329257146245	0.0804915731828421	0.0285117133616038
ENSMUSG00000029254	167.561783813948	59.1236641888579	94.340748390703	113.990561344392	163.376574183604	88.406241253926	61.8811688083254	51.6259862262157	86.5052333931191	65.3570894836837	28.0735138659371	44.6392956753823	114.466595529238	56.3470479087772	1.02425152238387	0.000892400444556157	0.0544602018474842	Stap1	5	86219605	86253984	+	6215	protein_coding	signal transducing adaptor family member 1 [Source:MGI Symbol;Acc:MGI:1926193]	-	181	67	79	110	164	86	64	54	81	69	30	42	0.954916362335916	0.319391189743372	0.53441706122096	0.644885956151947	0.937039873698056	0.502064792295609	0.350234579317493	0.293283923312807	0.49850330412899	0.370249321557031	0.158393310270578
ENSMUSG00000026979	363.821994689954	936.271756781764	255.555951336841	265.287124583311	333.726538728702	258.022866915528	181.775933374456	152.009848332746	240.292314980887	230.170619486016	176.863137355403	218.945116884018	402.114372172683	200.009495068921	1.00892543056842	0.000893655356887459	0.0544602018474842	Psd4	2	24257592	24304966	+	11786	protein_coding	pleckstrin and Sec7 domain containing 4 [Source:MGI Symbol;Acc:MGI:2674093]	-	393	1061	214	256	335	251	188	159	225	243	189	206	1.09333690239457	2.66709330720564	0.763381608725316	0.791416126742047	1.00933126685867	0.772697903023906	0.542514804596217	0.455371994643466	0.730197323368986	0.687584614803239	0.526201498980938
ENSMUSG00000020081	0	64.4183206833824	3.58256006546973	9.32650047363204	1.99239724614151	10.2797954946426	0	2.86811034590087	0	0	0	1.06284037322339	14.9332623272114	0.655158453187376	4.51177466417174	0.000895835985198768	1	Tacr2	10	62088217	62101769	+	2258	protein_coding	tachykinin receptor 2 [Source:MGI Symbol;Acc:MGI:98477]	-	0	73	3	9	2	10	0	3	0	0	0	1	0	0.957829447738847	0.0558588092210246	0.145227860364599	0.031452952186445	0.16068617443494	0	0.044846953631264	0	0	0
ENSMUSG00000036086	422.144604525748	112.952671883191	261.526884779291	118.135672666006	263.99263511375	150.085014221781	100.556899313529	94.6476414147287	142.039457299813	137.344608335277	48.6607573676242	81.8387087382008	221.472913864961	100.848012078195	1.13541263402707	0.000902799522911056	0.0546505020009952	Zranb3	1	127881921	128030784	-	9079	protein_coding	zinc finger, RAN-binding domain containing 3 [Source:MGI Symbol;Acc:MGI:1918362]	-	456	128	219	114	265	146	104	99	133	145	52	77	1.64685256153292	0.417696865268296	1.01414593668227	0.457507483596728	1.03648546094301	0.583468330803147	0.389596910947748	0.368072023667805	0.560322136250529	0.532618564507291	0.187941219713057
ENSMUSG00000041313	504.536862865203	575.352672405005	582.763103983077	524.356582184201	544.920646819702	430.723431225523	422.532355769347	376.678492094981	418.642610988922	455.605217994954	342.496869164432	436.827393394812	527.108883247119	408.797156567908	0.366948321445489	0.000904136464468259	0.0546505020009952	Slc7a1	5	148264220	148336714	-	11530	protein_coding	solute carrier family 7 (cationic amino acid transporter, y+ system), member 1 [Source:MGI Symbol;Acc:MGI:88117]	-	545	652	488	506	547	419	437	394	392	481	366	411	1.54986934377059	1.67535771867587	1.77944623636554	1.59901514314207	1.68466431145859	1.31852134436466	1.28905756297463	1.15346001711365	1.30041184005587	1.39124008648191	1.04161803682966
ENSMUSG00000026220	31.4756941970952	80.3022901669562	21.4953603928184	37.3060018945282	8.96578760763678	24.6715091871421	9.66893262630085	5.73622069180174	19.2233851984709	5.68322517249423	1.87156759106247	13.816924851904	34.0361072410295	9.33337602200571	1.88015015247218	0.000914065647137505	0.0546505020009952	Slc16a14	1	84883619	84912855	-	3352	protein_coding	solute carrier family 16 (monocarboxylic acid transporters), member 14 [Source:MGI Symbol;Acc:MGI:1919031]	-	34	91	18	36	9	24	10	6	18	6	2	13	0.332585108791655	0.804315882819837	0.225768242042494	0.391318029478837	0.095344107149901	0.259782373656869	0.101464979417988	0.0604202991046504	0.205396316306131	0.0596943948707312	0.0195786480376221
ENSMUSG00000053930	62.0256326825112	25.5908397235355	68.0686412439249	86.0110599234955	61.7643146303867	39.0632228796417	3.86757305052034	15.2965885114713	40.5827020856608	25.574513276224	19.6514597061559	23.3824882109145	57.0872851805826	21.3925541401578	1.4183586135105	0.000914431165983446	0.0546505020009952	Shisa6	11	66102551	66416790	-	7449	protein_coding	shisa family member 6 [Source:MGI Symbol;Acc:MGI:2685725]	-	67	29	57	83	62	38	4	16	38	27	21	22	0.294920337008777	0.115342480275619	0.321714946059927	0.405986399701243	0.295562323418819	0.185092180308975	0.0182634238694642	0.0725032774327787	0.195123589936082	0.120879346520353	0.0925077320891594
ENSMUSG00000012443	270.320667810347	71.4778626760819	207.788483797245	175.130953338202	360.623901551613	164.476727914281	50.2784496567644	69.7906850835878	119.612174568263	126.925362185705	80.4774064156862	128.60368516003	208.303099514628	95.9479605116727	1.11895629914974	0.000925007812227169	0.0546856330593236	Kif11	19	37364851	37410307	+	7461	protein_coding	kinesin family member 11 [Source:MGI Symbol;Acc:MGI:1098231]	-	292	81	174	169	362	160	52	73	112	134	86	121	1.28325718490476	0.321645323412411	0.980497666642844	0.825317457755913	1.72292704097249	0.778082041279387	0.237042645388996	0.330264162751006	0.574176135556098	0.598954830793383	0.378231874219368
ENSMUSG00000019558	1102.57505261001	1666.05191027707	1509.45197425125	674.616867592718	877.650986925334	704.165991383015	660.388098376348	490.446869149049	784.954895604229	746.396905987576	559.598709727679	632.390022067915	1089.0854638399	645.695916818799	0.754340505475811	0.000929664082942654	0.0546856330593236	Slc6a8	X	72716756	72726108	+	5210	protein_coding	solute carrier family 6 (neurotransmitter transporter, creatine), member 8 [Source:MGI Symbol;Acc:MGI:2147834]	-	1191	1888	1264	651	881	685	683	513	735	788	598	595	7.4955228296349	10.7362725790058	10.2000830264515	4.55275869408884	6.00473079449047	4.77040550064788	4.45864774125169	3.32364991212982	5.3960227384276	5.04399686327807	3.76634565036674
ENSMUSG00000021549	1775.59945500084	1392.49465805997	1567.96712198725	1370.99556962391	1503.26372221377	1323.0096801605	1087.75492045885	1192.17786711279	1386.21966597863	1112.01772541804	1149.14250091236	1188.25553726375	1488.88836784104	1185.92803619073	0.328522501629654	0.000931183770248955	0.0546856330593236	Rasa1	13	85362899	85437249	-	7320	protein_coding	RAS p21 protein activator 1 [Source:MGI Symbol;Acc:MGI:97860]	-	1918	1578	1313	1323	1509	1287	1125	1247	1298	1174	1228	1118	8.59142918674198	6.38682740688868	7.54133096872812	6.58536923215574	7.32037813864906	6.37925429606501	5.22710980034472	5.75030661932351	6.78246820758256	5.34863952700945	5.50483111043377
ENSMUSG00000025422	345.306880456368	195.019847548322	320.042032515296	523.320304353798	266.981230982962	472.870592753558	210.782731253359	155.833995460614	156.990979120846	233.012232072264	186.220975310716	281.652698904198	353.923481435051	204.082268686999	0.793974324179678	0.000933463093271038	0.0546856330593236	Agap2	10	126911153	126929038	+	5941	protein_coding	ArfGAP with GTPase domain, ankyrin repeat and PH domain 2 [Source:MGI Symbol;Acc:MGI:3580016]	-	373	221	268	505	268	460	218	163	147	246	199	265	2.0586246679692	1.1021024903601	1.89657314970811	3.09715679917614	1.6018822839517	2.80931687699181	1.24800729170145	0.92611236446172	0.946415703322935	1.38089885135067	1.09913297561015
ENSMUSG00000106251	11.1090685401513	27.3557252217104	9.55349350791929	24.8706679296854	29.8859586921226	17.4756523408923	0.966893262630085	1.91207356393391	10.679658443595	8.52483775874135	2.80735138659371	8.5027229857871	20.0417610387469	5.56558956688018	1.86447717173823	0.000937621678177777	1	Gm42658	3	104733646	104735220	-	1575	lncRNA	predicted gene 42658 [Source:MGI Symbol;Acc:MGI:5662795]	-	12	31	8	24	30	17	1	2	10	9	3	8	0.249820792082829	0.583136731313971	0.213552069792294	0.555216099391772	0.676388247971361	0.391625364562514	0.0215943245085141	0.0428632471108546	0.242853069579594	0.190567249149229	0.0625025030686756
ENSMUSG00000046591	54.619586989077	13.2366412363115	21.4953603928184	41.4511132161424	79.6958898456603	38.0352433301775	3.86757305052034	10.5164046016365	26.6991461089874	14.2080629312356	11.2294055463748	15.9426055983508	41.4223058350312	13.7438663061842	1.59807132814463	0.000962691220177443	0.0556296891322507	Ticrr	7	79309944	79347896	+	10007	protein_coding	TOPBP1-interacting checkpoint and replication regulator [Source:MGI Symbol;Acc:MGI:1924261]	-	59	15	18	40	80	37	4	11	25	15	12	15	0.193319652112662	0.0444095754819774	0.0756245775283742	0.145642276496792	0.283884345106397	0.134152964218462	0.0135949080047605	0.0371043147894252	0.0955565065923506	0.0499889106642078	0.0393490326104383
ENSMUSG00000027351	1384.93054467219	1195.70992501347	1324.35303753531	1333.68956772938	1541.11926989046	1116.38579071818	1025.87375165052	929.267752071882	1054.08228838282	1133.8034219126	1049.94941858605	1131.92499748291	1316.0313559265	1054.15027168113	0.320179104883695	0.000967874564979186	0.0556296891322507	Spred1	2	116951855	117012760	+	6784	protein_coding	sprouty protein with EVH-1 domain 1, related sequence [Source:MGI Symbol;Acc:MGI:2150016]	-	1496	1355	1109	1287	1547	1086	1061	972	987	1197	1122	1065	7.23058852085253	5.91756065845361	6.87290060260272	6.91232381258357	8.09766546721904	5.80826516384531	5.31924171993885	4.8363314417753	5.56487570737351	5.88429754061539	5.42704885504177
ENSMUSG00000032122	1762.63887503733	531.230534950633	1029.3889254783	716.06798080886	1269.15704579214	712.389827778729	324.876136243709	413.007889809725	922.722489526604	498.229406788661	160.954812831372	387.936736226536	1003.47886497433	451.287911904435	1.15324498029808	0.000970347959539226	0.0556296891322507	Slc37a2	9	37138881	37167034	-	6643	protein_coding	solute carrier family 37 (glycerol-3-phosphate transporter), member 2 [Source:MGI Symbol;Acc:MGI:1929693]	-	1904	602	862	691	1274	693	336	432	864	526	172	365	9.39789491818442	2.68485911337834	5.45553529191456	3.79005194296346	6.81021044190343	3.78504834621025	1.72026441817035	2.19510411969182	4.97477731572952	2.64063153457573	0.849612528541534
ENSMUSG00000078945	487.873260054976	322.091603416912	346.314139662074	324.354960916314	347.673319451693	236.435296376779	155.669815283444	129.064965565539	291.554675510142	282.26685023388	160.954812831372	203.002511285667	344.123763313125	203.752271785007	0.757125552636573	0.000978661768890337	0.0556937702965203	Naip2	13	100280571	100338600	-	4846	protein_coding	NLR family, apoptosis inhibitory protein 2 [Source:MGI Symbol;Acc:MGI:1298226]	-	527	365	290	313	349	230	161	135	273	298	172	191	3.5657845465083	2.23150938195864	2.51599019494506	2.35338128179305	2.55739242126605	1.72205443316223	1.12995890161916	0.940342335632012	2.15478226563116	2.05078044637481	1.16466694740021
ENSMUSG00000016239	27.7726713503782	57.358778690683	50.1558409165763	34.1971684033175	56.783321515033	32.8953455828562	2.90067978789026	8.60433103770261	30.9710094864254	19.8912881037298	5.61470277318741	21.2568074644677	43.1938544098073	14.8731364422339	1.54604639335415	0.00099520862457631	0.0564279644681931	Lonrf3	X	35592006	35625994	+	3812	protein_coding	LON peptidase N-terminal domain and ring finger 3 [Source:MGI Symbol;Acc:MGI:1921615]	-	30	65	42	33	57	32	3	9	29	21	6	20	0.258045479755021	0.505184162646548	0.463223682343922	0.315422315122064	0.530978969584023	0.304578704616238	0.0267663125138323	0.0796939307183059	0.290984101601468	0.183718426186626	0.0516481859040735
ENSMUSG00000025150	1811.70392775634	5410.25649465504	2079.07902466094	2305.71817264792	2568.2000502764	1840.08339354102	1317.87551696481	1957.96332946833	1813.40600372242	1435.96156025021	1192.18855550679	1304.1051379451	2669.17351058961	1503.58335064294	0.828159801859957	0.00102579156821499	0.0575298104507243	Cbr2	11	120620315	120622940	-	1327	protein_coding	carbonyl reductase 2 [Source:MGI Symbol;Acc:MGI:107200]	-	1957	6131	1741	2225	2578	1790	1363	2048	1698	1516	1274	1227	48.3557135089866	136.883044388394	55.159739240364	61.0928604090065	68.9870138822033	48.9423205391581	34.9337424872192	52.0948341675858	48.943037425033	38.0990890725626	31.5032397720299
ENSMUSG00000063142	36.1044727554916	417.395420318355	248.390831205902	54.9227250113887	40.8441435459009	30.8393864839277	54.1460227072848	16.2526252934383	34.1749070195039	50.2018223570324	35.5597842301869	26.5710093305847	138.082829886828	36.1510284896718	1.93325320764304	0.00104310476761074	0.057985054369044	Kcnma1	14	23339499	24064559	-	16976	protein_coding	potassium large conductance calcium-activated channel, subfamily M, alpha member 1 [Source:MGI Symbol;Acc:MGI:99923]	-	39	473	208	53	41	30	56	17	32	53	38	25	0.0753281208455457	0.825496120539482	0.515136502002499	0.113755360255479	0.0857637667152659	0.0641192357223305	0.112194829267845	0.0338025283162445	0.0721005814491727	0.104118239624122	0.0734522229158859
ENSMUSG00000037343	827.625606241269	735.07480998983	832.348121877468	925.396102550379	829.833453017938	815.187782725155	638.149553335856	717.983623257184	677.09034532392	691.459062653465	646.626602712083	749.302463122488	827.577646067006	686.768608400833	0.268817439019753	0.00104514698423434	0.057985054369044	Taf2	15	54878527	54935548	-	6878	protein_coding	TATA-box binding protein associated factor 2 [Source:MGI Symbol;Acc:MGI:2443028]	-	894	833	697	893	833	793	660	751	634	730	691	705	4.26189985330314	3.58816241154897	4.26054309785249	4.73064822254557	4.30069047025408	4.18324658078157	3.26363773285844	3.68564410176626	3.52574778465693	3.53954144792295	3.29664808821442
ENSMUSG00000027678	1301.61253062106	1543.39236815392	1250.31346284894	1393.79368189279	1672.6174881358	1224.32364341193	1111.9272520246	994.278253245635	1150.19921437518	1070.34074081975	1091.12390558942	1239.27187517847	1397.6755291774	1109.52354020551	0.333705351191612	0.00105468894271126	0.0582839160377885	Ncoa3	2	165834556	165915162	+	7895	protein_coding	nuclear receptor coactivator 3 [Source:MGI Symbol;Acc:MGI:1276535]	-	1406	1749	1047	1345	1679	1191	1150	1040	1077	1130	1166	1166	5.83930391627424	6.56337075459075	5.57556526107089	6.20728258681151	7.55185979582717	5.47346160623237	4.95411276327373	4.44648503911209	5.21780355416246	4.7732328713439	4.84622004477388
ENSMUSG00000042246	48.1392970073221	436.809160798278	97.9233084561727	49.7413358593709	67.7415063688112	56.5388752205341	28.0399046162725	34.4173241508104	42.7186337743798	58.7266601157737	43.981838389968	30.8223708234782	126.148913951748	39.7844553117805	1.66613459616576	0.00105944602176332	0.0582839160377885	Tmc7	7	118135064	118183959	-	5763	protein_coding	transmembrane channel-like gene family 7 [Source:MGI Symbol;Acc:MGI:2443317]	-	52	495	82	48	68	55	29	36	40	62	47	29	0.295857523158999	2.54475421151985	0.598218154903582	0.303475744071505	0.419001569539781	0.346271317075745	0.171147106008395	0.210857722643194	0.265482272835579	0.358780956666517	0.267612226829702
ENSMUSG00000040613	1624.70127399712	688.305344288196	1225.23554239065	937.831436515222	1262.18365543064	788.460314439084	506.652069618165	521.040046171991	1050.87839084974	692.406266848881	474.442384334336	542.048590343927	1087.78626117682	631.244624694507	0.785356564538134	0.00106559520890847	0.0582839160377885	Apobec1	6	122554751	122579403	-	2702	protein_coding	apolipoprotein B mRNA editing enzyme, catalytic polypeptide 1 [Source:MGI Symbol;Acc:MGI:103298]	-	1755	780	1026	905	1267	767	524	545	984	731	507	510	21.2970607240301	8.55260708219973	15.9645386371603	12.2037865110805	16.6512417781033	10.2994128755526	6.59577942889587	6.80842704270537	13.9294480841767	9.02232248238903	6.15714424659687
ENSMUSG00000058571	137.937601040212	353.85954238406	170.768696454057	188.602565133448	292.882395182802	123.357545935711	116.02719151561	97.5157517606296	82.2333700156812	136.397404139862	152.532758671591	99.9069950829984	211.234724355048	114.102245197729	0.888667292417969	0.00108610751520976	0.0587807325840236	Gpc6	14	117162727	118213956	+	6425	protein_coding	glypican 6 [Source:MGI Symbol;Acc:MGI:1346322]	-	149	401	143	182	294	120	120	102	77	144	163	94	0.76039811131048	1.84910044473263	0.935744453676447	1.03211864390825	1.62491091166349	0.677657989492471	0.63522604390804	0.535873980417027	0.458396980751211	0.747438860476355	0.832474972778508
ENSMUSG00000018774	3782.6378379215	1160.41221504997	2473.16063186261	2031.10454759098	3446.84723582481	1793.82431381513	889.541801619678	1065.98101189316	2245.93217068802	1548.67885950468	706.516765626082	933.173847690134	2447.99779701083	1231.63740950362	0.991120115544927	0.001101189457276	0.0587807325840236	Cd68	11	69555039	69556979	-	1257	protein_coding	CD68 antigen [Source:MGI Symbol;Acc:MGI:88342]	-	4086	1315	2071	1960	3460	1745	920	1115	2103	1635	755	878	106.583745452761	30.9941505028011	69.2690413733342	56.8135805761867	97.7453661447874	50.3689157812485	24.8927416172131	29.9416148896379	63.9923634358211	43.377926939398	19.7091723578729
ENSMUSG00000030867	198.111722299364	105.010687141404	120.612855537481	98.4463938883382	183.300546645019	97.6580571991043	77.3514610104068	57.3622069180174	66.2138823502887	94.7204195415705	36.4955680257182	97.7813143365516	133.856710451785	71.6541420304255	0.903496879796062	0.00111361353193364	0.0590329584273998	Plk1	7	121758662	121769096	+	2199	protein_coding	polo like kinase 1 [Source:MGI Symbol;Acc:MGI:97621]	-	214	119	101	95	184	95	80	60	62	100	39	92	3.19092382793382	1.60328597847293	1.93103657925245	1.57409066377698	2.97130990241171	1.56747572887853	1.23732828016042	0.92100428648835	1.07842665959288	1.51656519332038	0.581963961041898
ENSMUSG00000038178	1363.63816330357	899.209161320092	1111.78780698411	996.899272848225	1229.30910086931	916.957758122116	685.52732320473	772.477719829301	1009.22772291972	786.179482195035	637.268764756771	823.701289248125	1086.30021057457	785.730383692281	0.467734813336868	0.00112409249260682	0.0592178432682973	Slc43a2	11	75422520	75468401	+	10042	protein_coding	solute carrier family 43, member 2 [Source:MGI Symbol;Acc:MGI:2442746]	-	1473	1019	931	962	1234	892	709	808	945	830	681	775	4.80961621284241	3.00637554048504	3.89783831331141	3.49048858541394	4.36365391802675	3.22290189834387	2.40129877719029	2.71598129223629	3.59944669822275	2.75641236197227	2.22527458769451
ENSMUSG00000026039	109.239173978154	36.1801527125847	89.5640016367433	55.9590028417922	102.608458176288	45.2311001764272	23.205438303122	30.5931770229426	57.6701555954128	30.3105342533026	29.9450814569995	35.0737323163718	73.1303149203315	34.4663531580252	1.08750185651365	0.00112823162117853	0.0592178432682973	Sgo2a	1	58035130	58065058	+	7007	protein_coding	shugoshin 2A [Source:MGI Symbol;Acc:MGI:1098767]	-	118	41	75	54	103	44	24	32	54	32	32	33	0.552176326157103	0.173356847873784	0.450011385832287	0.28079735296412	0.521987933624252	0.227836346545742	0.116492859486489	0.154153536063014	0.294771707831376	0.152301497821562	0.149856151213608
ENSMUSG00000034593	1921.86885744617	1531.92061241578	1794.86259280034	1979.2906560708	2225.50772394006	1637.57142229656	1330.445129379	1303.07813382096	1542.14267925511	1712.5451853116	1246.46401564761	1358.30999697949	1848.50364416162	1415.49752339896	0.385029293162879	0.00113730773670067	0.0594742785688841	Myo5a	9	74978297	75130970	+	14803	protein_coding	myosin VA [Source:MGI Symbol;Acc:MGI:105976]	-	2076	1736	1503	1910	2234	1593	1376	1363	1444	1808	1332	1278	4.59838683528805	3.47447542402839	4.2687782747928	4.70126784828328	5.35906205926644	3.90452749662522	3.16146862628195	3.10800527440551	3.73114055356935	4.07319311158658	2.95264476092176
ENSMUSG00000056758	12.9605799635098	4.41221374543715	11.9418668848991	6.21766698242136	13.9467807229906	5.13989774732128	1.93378652526017	0.956036781966956	3.20389753307849	2.84161258624712	0	2.12568074644677	9.10316767442988	1.84350236216658	2.31654669879104	0.00113736552306556	1	Hmga2	10	120197180	120312374	-	6772	protein_coding	high mobility group AT-hook 2 [Source:MGI Symbol;Acc:MGI:101761]	HMGA	14	5	10	6	14	5	2	1	3	3	0	2	0.0677858395528941	0.0218747106639175	0.0620836735681598	0.0322823891221958	0.0734118963761002	0.0267889384136218	0.0100446134379532	0.00498446649435883	0.0169444883898934	0.0147737456886216	0
ENSMUSG00000028111	1461.76826874157	923.91755829454	1286.13906350363	955.448159632082	1090.83749226248	892.286248934974	626.546834184295	553.545296758868	1051.9463566941	882.794310127437	537.139898634929	629.201500948245	1101.73279856155	713.529032891313	0.62692276640902	0.00117565637718921	0.0606599502083725	Ctsk	3	95406567	95416673	+	1512	protein_coding	cathepsin K [Source:MGI Symbol;Acc:MGI:107823]	-	1579	1047	1077	922	1095	868	648	579	985	932	574	592	34.2419297481587	20.515596696429	29.9473410372787	22.2182831440631	25.7168448447444	20.8290941446239	14.576169043247	12.9259479568671	24.9177368266563	20.55655974619	12.4570960977152
ENSMUSG00000036769	303.647873430801	321.209160667825	400.05254064412	312.955904781875	350.661915320905	377.268494653382	313.273417092148	246.657489747475	259.515700179357	238.695457244758	265.762597930871	272.087135545187	344.299314916485	265.998632956633	0.370597271150722	0.00121881670325105	0.0618559467200757	Wdr44	X	23559290	23672264	+	8353	protein_coding	WD repeat domain 44 [Source:MGI Symbol;Acc:MGI:1919654]	-	328	364	335	302	352	367	324	258	243	252	284	256	1.28753562781825	1.29106516902291	1.68615184401052	1.31733378065613	1.49642701095543	1.59413843107617	1.31923665709263	1.04258831937602	1.11272526104214	1.00610746887119	1.11566182300246
ENSMUSG00000004221	1810.77817204466	1479.85649021962	1424.66471936846	1392.75740406238	1542.11546851353	1380.5765349305	1173.80842083292	1217.03482344394	1123.50006826619	1314.719423237	1144.4635819347	1352.99579511337	1505.12479818986	1221.08701880469	0.302123307895592	0.00124473175680078	0.0625558534529845	Ikbkg	X	73436896	73497460	+	8110	protein_coding	inhibitor of kappaB kinase gamma [Source:MGI Symbol;Acc:MGI:1338074]	-	1956	1677	1193	1344	1548	1343	1214	1273	1052	1388	1223	1273	7.90816804531004	6.12634529255523	6.18463317413648	6.0382318084284	6.77806077837639	6.00838298220602	5.09117486763308	5.29838094180553	4.961569062718	5.70761834998124	4.94837172106287
ENSMUSG00000022973	934.087513084385	785.374046687813	875.338842663105	889.126378486255	1044.01615697815	787.43233488962	581.102850840681	579.358289871976	765.731510405758	711.350350757195	684.057954533333	785.439035812083	885.895878798221	684.506665370171	0.372512564141238	0.0012548065006384	0.0628580900433066	Synj1	16	90732980	90808196	-	8085	protein_coding	synaptojanin 1 [Source:MGI Symbol;Acc:MGI:1354961]	-	1009	890	733	858	1048	766	601	606	717	751	731	739	4.09203213005804	3.26136378845476	3.81169644052966	3.86668354933555	4.60295379138952	3.4375671801553	2.52821864213317	2.53004491063421	3.39205813419291	3.09774900673314	2.96683959371441
ENSMUSG00000036676	609.147258284961	763.312977960628	582.763103983077	734.720981756124	818.875268164159	580.808445447304	543.394013598108	540.16078181133	432.526166965596	590.108213743984	495.029627836023	500.597815788215	681.604672599376	516.969436623876	0.3989926697567	0.00129174364487804	0.064086217561113	Tmtc3	10	100279764	100323212	-	8939	protein_coding	transmembrane and tetratricopeptide repeat containing 3 [Source:MGI Symbol;Acc:MGI:3036255]	-	658	865	488	709	822	565	562	565	405	623	529	471	2.41359751160682	2.86692566579892	2.29522486914584	2.8899389276779	3.26541389878108	2.29330574738632	2.13829470172404	2.13351225096609	1.73296679447459	2.32426382576292	1.94188473707886
ENSMUSG00000073490	1384.00478896051	677.716031299147	1176.27388816256	1606.23063712552	1666.64029639737	969.384715144793	633.315087022706	749.532837062094	1026.31517642948	769.129806677553	618.553088846146	883.220350148635	1246.70839284832	780.011057697768	0.676692180992705	0.00130747402426921	0.0646593943184124	Ifi207	1	173550993	173569313	-	3422	protein_coding	interferon activated gene 207 [Source:MGI Symbol;Acc:MGI:2138302]	-	1495	768	985	1550	1673	943	655	784	961	812	661	831	14.3248169335192	6.64921655132237	12.101817002996	16.5037661046192	17.3608622998085	9.99848355076769	6.51000731183396	7.73342161491573	10.7415644298344	7.91338576975614	6.3383784708963
ENSMUSG00000026068	92.5755711679272	62.6534351852076	77.6221347518442	67.3580589762314	59.7719173842452	47.2870592753558	35.7750507173131	36.3293977147443	44.8545654630988	54.9378433341109	27.1377300704058	40.3879341824887	67.8780294568019	39.9037535803603	0.767578697949949	0.00132364976743765	0.0648782078742868	Il18rap	1	40554522	40590865	+	6752	protein_coding	interleukin 18 receptor accessory protein [Source:MGI Symbol;Acc:MGI:1338888]	-	100	71	65	65	60	46	37	38	42	58	29	38	0.485618764230915	0.311540977006501	0.404739209585791	0.350761800054506	0.315554351467682	0.24718826371754	0.186375779137094	0.18997077455455	0.237925511740079	0.286471797817636	0.140936109185513
ENSMUSG00000043091	1615.44371688033	1347.49007785651	1446.16007976128	1255.96873044911	1526.17629054439	1438.14338970049	852.799857639735	1121.43114524724	1219.61699425854	1370.60447076653	933.912227940173	1033.08084277313	1438.23038086535	1088.57425643756	0.401956521326086	0.00132447274942016	0.0648782078742868	Tuba1c	15	98927772	98935991	+	2287	protein_coding	tubulin, alpha 1C [Source:MGI Symbol;Acc:MGI:1095409]	-	1745	1527	1211	1212	1532	1399	882	1173	1142	1447	998	972	25.0182633523046	19.7816327521388	22.2624180977583	19.3093574575309	23.7874537753986	22.1949411999063	13.1166400922616	17.3128066148068	19.0995921993589	21.1003024336745	14.3192769929307
ENSMUSG00000041552	32.4014499087745	11.4717557381366	9.55349350791929	27.9795014208961	28.8897600690519	14.3917136924996	3.86757305052034	3.82414712786783	5.33982922179748	7.57763356332564	11.2294055463748	10.6284037322339	20.781279056213	7.07783204035333	1.55803849810881	0.00133043397966863	1	Ptchd1	X	154356451	154406810	-	3005	protein_coding	patched domain containing 1 [Source:MGI Symbol;Acc:MGI:2685233]	-	35	13	8	27	29	14	4	4	5	8	12	10	0.381901585234775	0.128170517671124	0.111928289491801	0.327378877241197	0.342695876052046	0.169038647129362	0.0452726270893972	0.0449315235937411	0.0636428593324228	0.0887834105853315	0.131036861674761
ENSMUSG00000025001	114.79370824823	59.1236641888579	77.6221347518442	111.918005683584	139.467807229906	111.02179134214	65.7487418588458	62.1423908278522	40.5827020856608	64.409885288268	76.7342712335613	38.2622534360419	102.324518574094	57.9800407883717	0.816319920528072	0.00135879147825242	0.0655959002826742	Hells	19	38919359	38959495	+	7205	protein_coding	helicase, lymphoid specific [Source:MGI Symbol;Acc:MGI:106209]	-	124	67	65	108	140	108	68	65	38	68	82	36	0.564307202102436	0.275505377412222	0.379292039295386	0.546161568971434	0.690000502788272	0.543866387819599	0.320992665490889	0.304519425605395	0.201731522752793	0.314746740440781	0.37345354019521
ENSMUSG00000024679	471.209657244749	154.4274810903	411.994407529019	286.012681191383	386.525065751452	225.127521332672	115.06029825298	144.36155407701	264.855529401155	230.170619486016	87.0278929844049	138.16924851904	322.549469023263	163.274190453434	0.982447241046201	0.00136318869760657	0.0655959002826742	Ms4a6d	19	11563968	11582213	-	1735	protein_coding	membrane-spanning 4-domains, subfamily A, member 6D [Source:MGI Symbol;Acc:MGI:1916024]	-	509	175	345	276	388	219	119	151	248	243	93	130	9.61936039831903	2.98832502683673	8.36014812128153	5.79616806929883	7.94122686523148	4.57980603057214	2.33274713026412	2.9377382547951	5.46734345693311	4.67081975220229	1.75889608779717
ENSMUSG00000024087	550.824648449167	802.140458920474	388.110673759221	786.534873276302	900.563555255961	354.652944565168	448.638473860359	360.425866801543	459.225313074583	346.676735522148	319.102274276151	341.171759804707	630.471192371049	379.206737223249	0.734117896119657	0.00137523793121983	0.0657392042380613	Cyp1b1	17	80008966	80022490	-	5840	protein_coding	cytochrome P450, family 1, subfamily b, polypeptide 1 [Source:MGI Symbol;Acc:MGI:88590]	-	595	909	325	759	904	345	464	377	430	366	341	321	3.34065795919837	4.61147967191742	2.33972529376991	4.73543953778117	5.49681271382205	2.14342699908497	2.70224869020926	2.17903463640819	2.81630550295857	2.09003977876852	1.91601209107357
ENSMUSG00000061848	331.420544781179	625.651909102988	403.63510070959	331.608905729139	302.844381413509	371.100617356596	156.636708546074	273.42651964255	201.845544583945	297.422117360531	227.39546231409	313.537910100899	394.376909848834	245.044043758015	0.687165362640408	0.00141237474111775	0.0671525526035073	Gm5805	15	81856591	81857046	+	456	processed_pseudogene	predicted gene 5805 [Source:MGI Symbol;Acc:MGI:3644633]	-	358	709	338	320	304	361	162	286	189	314	243	295	25.7422247105087	46.0649553933241	31.1634990005284	25.5691624719895	23.6735886789976	28.7239927316991	12.08287697006	21.170778137154	15.8533525191021	22.9641893437503	17.4863088354963
ENSMUSG00000025582	43.5105184489258	36.1801527125847	39.4081607201671	24.8706679296854	28.8897600690519	16.4476727914281	25.1392248283822	3.82414712786783	14.9515218210329	12.3136545404042	10.2936217508436	8.5027229857871	31.5511554453071	12.5041488423863	1.33613136835111	0.00141428594539333	0.0671525526035073	Nptx1	11	119429545	119438579	-	5217	protein_coding	neuronal pentraxin 1 [Source:MGI Symbol;Acc:MGI:107811]	-	47	41	33	24	29	16	26	4	14	13	11	8	0.295396206854697	0.23283715412145	0.265942323832051	0.167618431386245	0.197393350112401	0.111276022809766	0.16950116707373	0.0258806264901652	0.102643476791835	0.0831014935431276	0.0691876471576772
ENSMUSG00000072082	155.526959562118	72.3603054251693	140.91402924181	100.518949549145	150.425992083684	101.769975396961	75.4176744851466	70.7467218655548	64.0779506615697	104.192461495728	49.5965411631555	52.079178287946	120.252701876481	69.35175465985	0.791740574475139	0.00143309516095156	0.0678375535057161	Ccnf	17	24441172	24470458	-	7800	protein_coding	cyclin F [Source:MGI Symbol;Acc:MGI:102551]	-	168	82	118	97	151	99	78	74	60	110	53	49	0.706224162234153	0.311464470013232	0.636036092482336	0.453115061883429	0.687444594332431	0.460514215455581	0.340110611009096	0.320237913510904	0.294225834298355	0.470310198220855	0.222965659985372
ENSMUSG00000071203	288.835782043933	475.636641758125	265.10944484476	237.307623162415	294.874792428943	242.603173673564	184.676613162346	197.89961386716	252.039939268841	179.021592933568	184.349407719653	203.002511285667	300.727909651957	200.164946372873	0.589708244884461	0.00144852498360246	0.0681511192133206	Naip5	13	100348247	100382831	-	5204	protein_coding	NLR family, apoptosis inhibitory protein 5 [Source:MGI Symbol;Acc:MGI:1298220]	-	312	539	222	229	296	236	191	207	236	189	197	191	1.96582656337276	3.06860324335321	1.79353577063018	1.60335452414911	2.01980656677074	1.6454214858241	1.24829221181279	1.3426681532779	1.73459811611713	1.21118596572075	1.24218320136006
ENSMUSG00000004360	438.808207335975	258.555725482617	552.908436770829	470.470135003216	298.859586921226	343.345169521061	306.505164253737	273.42651964255	258.447734334998	258.586745348488	148.789623489466	223.196478376911	393.824543505821	244.825377574358	0.684842312760373	0.00145620156208244	0.0681739919396911	9330159F19Rik	10	29087602	29106775	+	5767	protein_coding	RIKEN cDNA 9330159F19 gene [Source:MGI Symbol;Acc:MGI:3036239]	-	474	293	463	454	300	334	317	286	242	273	159	210	2.69498457212641	1.50524409226643	3.3754011638262	2.86838384970584	1.8472541885814	2.10135275786279	1.86951731732068	1.6739855783843	1.60505371025251	1.57869782002851	0.904698533667019
ENSMUSG00000022369	89.7983040328894	144.720610850339	69.2628279324149	87.0473377538991	109.581848537783	99.7140162980328	65.7487418588458	65.96653795572	46.9904971518178	53.9906391386952	75.79848743803	68.0217838862968	100.020824234226	62.7527812382343	0.6755483146509	0.00145781971264537	0.0681739919396911	Mtbp	15	55420804	55489819	+	5481	protein_coding	Mdm2, transformed 3T3 cell double minute p53 binding protein [Source:MGI Symbol;Acc:MGI:2146005]	-	97	164	58	84	110	97	68	69	44	57	81	64	0.580282970115768	0.886488913009745	0.444900145400612	0.558406996514713	0.71266960993151	0.642117315121093	0.421958065108895	0.42493736359899	0.307055605215579	0.346817790597257	0.484933213463863
ENSMUSG00000022533	2180.15470100469	2573.20305633895	2242.68260098405	2793.805030768	2249.41649089376	2078.57464901672	1651.45369257219	1696.00925120938	1787.7748234578	2105.63492640911	1727.45688655066	2153.31459615058	2352.97275483436	1853.60736272495	0.344308874036324	0.00148577088076466	0.0690638061962647	Atp13a3	16	30131241	30224793	-	9938	protein_coding	ATPase type 13A3 [Source:MGI Symbol;Acc:MGI:2685387]	-	2355	2916	1878	2696	2258	2022	1708	1774	1674	2223	1846	2026	7.76997841143611	8.69316233520627	7.94494603586154	9.88444439373005	8.06826774559921	7.38217961510785	5.84533028379489	6.02546063544392	6.44288851479251	7.45979312741789	6.09522045170124
ENSMUSG00000016763	9.25755711679272	240.024427751781	219.730350682144	2.07255566080712	11.954383476849	3.08393864839277	8.70203936367077	2.86811034590087	6.40779506615697	15.1552671266513	5.61470277318741	8.5027229857871	81.0205355561277	7.8751062768924	3.36245742528118	0.00149867575157985	0.0692866098982639	Scube1	15	83489200	83609222	-	9829	protein_coding	signal peptide, CUB domain, EGF-like 1 [Source:MGI Symbol;Acc:MGI:1890616]	-	10	272	184	2	12	3	9	3	6	16	6	8	0.0333594251306047	0.819877241785845	0.787050943964375	0.00741399054279887	0.0433538097692499	0.0110742511509033	0.0311424915971296	0.0103026168785628	0.0233488809393343	0.0542871398532752	0.0200308154101463
ENSMUSG00000031766	4.62877855839636	5.29465649452458	1.19418668848991	3.10883349121068	4.98099311535377	3.08393864839277	0	0	1.0679658443595	0	0	0	3.71523116606134	0.177994307393249	3.88303795136094	0.00150654389365135	1	Slc12a3	8	95055829	95092842	+	11119	protein_coding	solute carrier family 12, member 3 [Source:MGI Symbol;Acc:MGI:108114]	-	5	6	1	3	5	3	0	0	1	0	0	0	0.0147445718863528	0.0159872874124705	0.00378119109095762	0.00983075542474639	0.0159683348405866	0.00978944280620813	0	0	0.00343999986138916	0	0
ENSMUSG00000061126	24.9954042153403	295.618320944289	99.1174951446626	22.7981122688783	19.9239724614151	25.6994887366064	21.2716517778619	35.3733609327774	6.40779506615697	19.8912881037298	21.5230272972184	13.816924851904	81.3587989618653	19.7140080049414	2.0442609399228	0.00150896582370093	0.0692866098982639	Cyp4f39	17	32671697	32712294	+	2856	protein_coding	cytochrome P450, family 4, subfamily f, polypeptide 39 [Source:MGI Symbol;Acc:MGI:2445210]	-	27	335	83	22	20	25	22	37	6	21	23	13	0.309979843117481	3.47516849484429	1.22183973755242	0.280669903185179	0.248672149989471	0.317602750239928	0.26198996646359	0.437299671811109	0.0803557950814834	0.245215210302317	0.264256906356533
ENSMUSG00000034602	2339.38468341352	2079.03511684999	2218.79886721426	2500.53840476379	2266.35186748596	2100.16221955547	1823.56069332034	1921.63393175358	1873.21209100656	1967.34311387842	1933.32932156753	2070.41304703916	2250.7118598805	1931.58203309426	0.220575732961796	0.00153821371909733	0.069706774675207	Mon2	10	122827965	122912410	-	14041	protein_coding	MON2 homolog, regulator of endosome to Golgi trafficking [Source:MGI Symbol;Acc:MGI:1914324]	-	2527	2356	1858	2413	2275	2043	1886	2010	1754	2077	2066	1948	5.90112882516359	4.97126036167526	5.56342229396659	6.26167683135088	5.75358744869165	5.27925665671087	4.56839692588246	4.83207480027021	4.77810517318644	4.93315510893214	4.82824157491909
ENSMUSG00000042225	283.281247773857	217.963359024595	312.876912384357	266.323402413715	256.023046129184	190.176216650887	145.033989394513	144.36155407701	228.544690692932	173.338367761074	119.780325827998	205.128192032114	254.440697396099	169.364519964274	0.588124281254991	0.00154288388715952	0.069706774675207	Ammecr1	X	141634142	141749724	-	5437	protein_coding	Alport syndrome, mental retardation, midface hypoplasia and elliptocytosis chromosomal region gene 1 [Source:MGI Symbol;Acc:MGI:1860206]	-	306	247	262	257	257	185	150	151	214	183	128	193	1.84539774913126	1.34594366496833	2.02598541474595	1.72228554833628	1.67853015187669	1.23456751235438	0.938322450825169	0.937461076341641	1.50549249773409	1.12247860106751	0.772515763512047
ENSMUSG00000034853	126.82853250006	182.665649061098	132.55472242238	86.0110599234955	88.6616774532971	67.8466502646409	67.682528384106	57.3622069180174	74.7576091051647	52.0962307478638	59.890162913999	82.9015491114242	114.094715270829	65.7817145300958	0.797896092757835	0.00158719500032336	0.0703959639255164	Acot11	4	106601752	106662195	-	6056	protein_coding	acyl-CoA thioesterase 11 [Source:MGI Symbol;Acc:MGI:1913736]	-	137	207	111	83	89	66	70	60	70	55	64	78	0.74175860595102	1.01268351742147	0.770604371727166	0.499371316277173	0.521866593237481	0.395421717366087	0.393126531879735	0.334426754621513	0.442116098433789	0.302874797401145	0.34677742785791
ENSMUSG00000034973	706.351608011284	613.297710615764	635.307318276633	868.400821878183	694.350440280315	763.788805251942	519.221682032356	491.402905931016	461.361244763302	663.042936790994	509.066384768992	609.007533857001	713.582784052354	542.183781357277	0.396114038484549	0.00161363098333519	0.0710426365086051	Dop1a	9	86349207	86437976	+	20476	protein_coding	DOP1 leucine zipper like protein A [Source:MGI Symbol;Acc:MGI:1289294]	-	763	695	532	838	697	743	537	514	432	700	544	573	1.22182022597894	1.0056085244008	1.09234762208783	1.49118066838866	1.20876816584743	1.31657662987132	0.891968148622215	0.847332039914836	0.806980018274839	1.14009025301722	0.871787208264004
ENSMUSG00000025915	497.130817171769	391.804580594819	472.897928642005	657.000144475857	554.88263305041	490.34624509445	330.677495819489	326.008542650732	440.001927876112	406.350599833338	335.946382595713	410.256384064227	510.677058171552	374.873555473269	0.4462535219302	0.00161554415989592	0.0710426365086051	Sgk3	1	9868332	9971070	+	14311	protein_coding	serum/glucocorticoid regulated kinase 3 [Source:MGI Symbol;Acc:MGI:2182368]	-	537	444	396	634	557	477	342	341	412	429	359	386	1.23035998197107	0.919183565558323	1.16337455392228	1.61417509854789	1.38210351067728	1.20934676230831	0.812786171232695	0.804303628050529	1.10116244043183	0.999709051071092	0.823154165737449
ENSMUSG00000001473	1189.59608950786	1164.82442879541	1187.02156835897	837.312486966077	1381.72749019914	1061.90287459658	729.037520023084	897.718538266972	944.081806413794	1013.5084890948	662.534927236114	694.034763714872	1137.06415640401	823.486007458274	0.465567962817945	0.00163108634376451	0.0715229051420138	Tubb6	18	67523787	67535819	+	2437	protein_coding	tubulin, beta 6 class V [Source:MGI Symbol;Acc:MGI:1915201]	-	1285	1320	994	808	1387	1033	754	939	884	1070	708	653	17.2892236211406	16.0475103498716	17.1484634213852	12.0805636726503	20.2104641964114	15.3796779432064	10.5229134468961	13.0060582136686	13.8746134089319	14.6424773915442	9.53310643850091
ENSMUSG00000032712	1628.40429684384	1533.68549791395	1858.1544872903	1852.86476076157	1535.14207815203	1581.03254707602	744.507812225165	841.312368130922	977.188747588938	1646.2408916325	693.415792488645	1469.90823616794	1664.88061133962	1062.09564137235	0.648532859248244	0.0016741573937643	0.0727929278035889	Resf1	6	149210912	149237161	+	9629	protein_coding	retroelement silencing factor 1 [Source:MGI Symbol;Acc:MGI:1914496]	-	1759	1738	1556	1788	1541	1538	770	880	915	1738	741	1383	5.98980309400485	5.34758686448631	6.79395650430956	6.76577724191318	5.68298891177724	5.79532235250137	2.71975460044661	3.08487176735095	3.63466226916495	6.01942349452052	2.52518810429863
ENSMUSG00000037608	1779.30247784756	2260.818323162	1870.0963541752	2012.45154664371	1967.49228056474	1728.03362264941	1637.91718689536	1466.56042353731	1394.7633927335	1674.65701749497	1504.74034321423	1771.75490216339	1936.3657675071	1575.06554433979	0.298165939320108	0.00169078847242449	0.0731607781739394	Bclaf1	10	20188215	20220359	+	15301	protein_coding	BCL2-associated transcription factor 1 [Source:MGI Symbol;Acc:MGI:1917580]	-	1922	2562	1566	1942	1975	1681	1694	1534	1306	1768	1608	1667	4.11871234316677	4.96076406847027	4.30294999133392	4.62445734049148	4.58355705258025	3.98611980217209	3.76542301189079	3.38408431416836	3.26473185721029	3.85344140165816	3.4484421338851
ENSMUSG00000041440	124.977021076702	170.311450573874	133.74890911087	184.457453811834	160.387978314391	169.616625661602	92.8217532124882	106.120082798332	124.952003790061	129.766974771952	103.872001303967	120.100962174243	157.249906424879	112.938963008507	0.479216902877429	0.00169207045586086	0.0731607781739394	Gk5	9	96001415	96066661	+	8493	protein_coding	glycerol kinase 5 (putative) [Source:MGI Symbol;Acc:MGI:2443336]	-	135	193	112	178	161	165	96	111	117	137	111	113	0.521195356142427	0.673264084278759	0.554435786991649	0.763642771814451	0.673162800656768	0.704896361818268	0.384441524277325	0.441161378556173	0.526925107697866	0.53795476255184	0.428862989088316
ENSMUSG00000028906	2057.02919135134	2623.50229303693	2093.40926492281	2502.6109604246	1734.38180276618	2312.95398629457	1594.40699007701	1504.80189481599	2010.97968492893	1755.1693741053	1536.55699226229	1845.0908879158	2220.64791646607	1707.83430401755	0.379113995104424	0.00171974662981044	0.0739443280078771	Epb41	4	131650724	131802632	-	16386	protein_coding	erythrocyte membrane protein band 4.1 [Source:MGI Symbol;Acc:MGI:95401]	-	2222	2973	1753	2415	1741	2250	1649	1574	1883	1853	1642	1736	4.44630240760748	5.37540537350805	4.49783295110749	5.37001565373141	3.7729511067498	4.98209513741433	3.42269252748688	3.24240610124997	4.39543158659186	3.77128003892752	3.28819008729109
ENSMUSG00000099760	26.8469156386989	5.29465649452458	15.5244269503688	10.3627783040356	8.96578760763678	11.3077750441068	5.80135957578051	0.956036781966956	3.20389753307849	1.89440839083141	6.55048656871864	1.06284037322339	13.0503900065619	3.24483820393323	1.99870076317094	0.00172588580933138	1	Gm28800	1	127887253	127895189	+	2243	lncRNA	predicted gene 28800 [Source:MGI Symbol;Acc:MGI:5579506]	-	29	6	13	10	9	11	6	1	3	2	7	1	0.423932407429902	0.0792521840121529	0.243673574955262	0.162443408482323	0.142484818174975	0.177936834623943	0.0909792093648943	0.0150489554613455	0.0511583037790273	0.0297363072680474	0.102406018179841
ENSMUSG00000038774	600.815456879847	659.184733568311	607.841024441365	632.129476546172	662.472084342051	495.486142841771	428.333715345128	525.820230081826	513.691571136917	456.55242219037	488.479141267305	523.98030399913	609.65481976992	489.476230670113	0.317517087025751	0.00173550626445981	0.0744152395223639	Ascc3	10	50468765	50727581	+	16685	protein_coding	activating signal cointegrator 1 complex subunit 3 [Source:MGI Symbol;Acc:MGI:1925237]	-	649	747	509	610	665	482	443	550	481	482	522	493	1.2753999008454	1.32642791537535	1.28258432387427	1.33209436492519	1.41530744424933	1.04814960781129	0.903020681312734	1.11268468114408	1.10266355520984	0.96340110672685	1.02659939861975
ENSMUSG00000027068	220.329859379667	52.0641221961584	244.808271140432	122.28078398762	201.232121860292	75.0425071108907	24.1723315657521	58.3182436999843	92.9130284592761	109.875686668222	33.6882166391245	48.8906571682758	152.62627761251	61.3096940334391	1.31541622149989	0.00175954849660923	0.0751726582967595	Dhrs9	2	69210789	69234877	+	4281	protein_coding	dehydrogenase/reductase (SDR family) member 9 [Source:MGI Symbol;Acc:MGI:2442798]	-	238	59	205	118	202	73	25	61	87	116	36	46	1.82288647341448	0.408315669065494	2.01327448417971	1.00431083150316	1.67556584203137	0.618699950404318	0.198616334389802	0.480972490793665	0.777317025441344	0.903647549107535	0.275939572062128
ENSMUSG00000110386	199.963233722723	205.609160537371	151.661709438219	44.5599467073531	380.547874013028	149.057034672317	71.5501014346263	73.6148322114556	93.9809943036356	75.7763356332564	73.9269198469676	128.60368516003	188.566493181835	86.2421447649952	1.13017066854571	0.00176288358173808	0.0751726582967595	Gm42031	8	85852501	85858918	-	1885	lncRNA	predicted gene, 42031 [Source:MGI Symbol;Acc:MGI:5624916]	-	216	233	127	43	382	145	74	77	88	80	79	121	3.75725170055608	3.66213060621108	2.83260959948299	0.831167337119977	7.19626860109583	2.79099524518534	1.33518223950521	1.37884357914294	1.78564644263829	1.41535357458314	1.37522085664367
ENSMUSG00000103847	251.805553576762	59.1236641888579	148.079149372749	109.845450022777	205.216916352575	91.4901799023187	24.1723315657521	74.5708689934226	105.72861859159	74.8291314378407	29.0092976614683	59.5190609005097	144.260152236007	61.3048848584306	1.23597257151367	0.00177264105937957	0.0751878558095764	Gm20056	16	32227354	32227872	+	519	processed_pseudogene	predicted gene, 20056 [Source:MGI Symbol;Acc:MGI:5012241]	-	272	67	124	106	206	89	25	78	99	79	31	56	17.1842047733276	3.82469411224481	10.0449709129179	7.44166086973798	14.0946799649523	6.22192966990257	1.6382977408916	5.07297678956502	7.29612039965284	5.07628558668227	1.95997733611309
ENSMUSG00000039735	931.310245949348	1427.79236802346	865.785349155186	860.110599234955	990.221431332329	897.426146682295	686.49421646736	688.346483016209	687.770003767515	808.912382885012	662.534927236114	857.712181191273	995.441023396263	731.961699093914	0.444359767259875	0.0017996896356023	0.0760174867127359	Fnbp1l	3	122332368	122413364	-	12376	protein_coding	formin binding protein 1-like [Source:MGI Symbol;Acc:MGI:1925642]	-	1006	1618	725	830	994	873	710	720	644	854	708	807	2.66529677073663	3.87335657266916	2.46292996216543	2.44359461164719	2.85207827411001	2.55938954731807	1.95118401597009	1.9637573619792	1.99035123201828	2.30125043514482	1.87719621773002
ENSMUSG00000019899	1431.21833025615	933.624428534502	1373.3146917634	1625.91991590319	1641.7353308206	817.243741824083	643.950912911637	894.850427921071	950.489601479951	927.312907311975	952.627903850797	898.100115373762	1303.84273985032	877.888644808199	0.570566294339656	0.00180266853225325	0.0760174867127359	Lama2	10	26856032	27495754	-	16605	protein_coding	laminin, alpha 2 [Source:MGI Symbol;Acc:MGI:99912]	-	1546	1058	1150	1569	1648	795	666	936	890	979	1018	845	3.05280105230395	1.88771336310485	2.91174485404466	3.44282882769864	3.524306607316	1.73712350852096	1.36412927992808	1.90270999370135	2.05010111582774	1.96621101839757	2.01171109696198
ENSMUSG00000049878	648.02899817549	633.593893844775	665.161985488881	650.782477493436	579.787598627179	593.144200040875	458.30740648666	415.876000155626	541.458683090264	529.487145237379	391.157626532056	590.939247512203	628.416525611773	487.871018169032	0.365986251863421	0.00180762836674323	0.0760174867127359	Rlf	4	121002570	121072281	-	9492	protein_coding	rearranged L-myc fusion sequence [Source:MGI Symbol;Acc:MGI:1924705]	zf-C2H2	700	718	557	628	582	577	474	435	507	559	418	556	2.41806629504951	2.24107286477714	2.46712879302353	2.41064512180609	2.17731172742993	2.20556840856882	1.69840317760547	1.54691751879605	2.04302831211595	1.9639950640564	1.44502468377801
ENSMUSG00000094613	15.7378470985476	3.52977099634972	0	2.07255566080712	4.98099311535377	4.11191819785702	0	0	0	0.947204195415705	0	0	5.07218084481921	0.157867365902618	4.33031576762044	0.00181260758179495	1	A630076J17Rik	3	107137930	107142039	+	1358	protein_coding	RIKEN cDNA A630076J17 gene [Source:MGI Symbol;Acc:MGI:2442999]	-	17	4	0	2	5	4	0	0	0	1	0	0	0.410465863280422	0.0872668869608537	0	0.0536613498123491	0.130745151025392	0.106871688328157	0	0	0	0.024557635199643	0
ENSMUSG00000025892	12.9605799635098	217.963359024595	15.5244269503688	42.487391046546	51.8023283996792	19.5316114398209	21.2716517778619	14.3405517295043	13.8835559766734	17.0496755174827	16.8441083195622	14.8797652251274	60.0449494707533	16.3782180910353	1.87698471648276	0.00183210118429719	0.0763111340495107	Gria4	9	4417896	4796234	-	6305	protein_coding	glutamate receptor, ionotropic, AMPA4 (alpha 4) [Source:MGI Symbol;Acc:MGI:95811]	-	14	247	13	41	52	19	22	15	13	18	18	14	0.0728066146633147	1.16064959657935	0.0866867293615625	0.236935498402218	0.292869138296878	0.109337958058807	0.118674598607456	0.0803048543214862	0.0788646566160538	0.0952080626201543	0.0936794058681974
ENSMUSG00000027254	1159.04615102245	734.192367240742	1459.29613333467	1132.65166863109	1655.68211154359	1438.14338970049	783.183542730369	811.675227889946	745.440159362928	1060.86869886559	547.433520385772	973.561781872623	1263.16863691217	820.360488517871	0.622504464170718	0.00183395192624963	0.0763111340495107	Map1a	2	121120081	121141313	+	12166	protein_coding	microtubule-associated protein 1 A [Source:MGI Symbol;Acc:MGI:1306776]	-	1252	832	1222	1093	1662	1399	810	849	698	1120	585	916	3.37430557775859	2.02611819484716	4.22296760568118	3.27343496458864	4.85108142172786	4.17226948250746	2.26442211834102	2.35556725527935	2.19448070066026	3.07012829469415	1.57784656049375
ENSMUSG00000020183	73.1347012226625	172.076336072049	99.1174951446626	119.171950496409	73.7186981072358	120.273607287318	87.0203936367077	43.021655188513	79.0294724826027	48.307413966201	49.5965411631555	62.7075820201798	109.58213138839	61.6138430762266	0.833476248085977	0.00184597531464828	0.0766055010601629	Cpm	10	117465405	117523257	+	5964	protein_coding	carboxypeptidase M [Source:MGI Symbol;Acc:MGI:1917824]	-	79	195	83	115	74	117	90	45	74	51	53	59	0.434327521446821	0.968693173042575	0.585106353194115	0.70257318915112	0.44060502068557	0.711788022791231	0.513245388846725	0.254689188378758	0.474589625410827	0.285179862283178	0.291604987908434
ENSMUSG00000085337	14.8120913868683	24.7083969744481	14.3302402618789	15.5441674560534	17.9315752152736	20.5595909892851	3.86757305052034	2.86811034590087	16.0194876653924	3.78881678166282	5.61470277318741	7.43988261256371	17.9810103806346	6.59976220487126	1.46685931189084	0.0018473444659766	1	Gm15964	16	91408356	91420749	+	2745	lncRNA	predicted gene 15964 [Source:MGI Symbol;Acc:MGI:3802003]	-	16	28	12	15	18	20	4	3	15	4	6	7	0.191119731648066	0.302207295974454	0.183794814165499	0.199104134003197	0.232854970613091	0.264356562385496	0.0495607447736388	0.0368904995626208	0.20901288775293	0.0485963841182006	0.0717241838492999
ENSMUSG00000040268	1428.44106312112	1222.18320748609	1384.06237195981	1200.00972760732	1257.20266231529	1208.90395016996	1014.27103249896	1074.58534293086	1103.20871722336	1068.44633242892	1017.19698574245	1203.13530248887	1283.4671637766	1080.14061888557	0.249019364175075	0.00185128910028088	0.0766124349153207	Plekha1	7	130467486	130515042	+	8527	protein_coding	pleckstrin homology domain containing, family A (phosphoinositide binding specific) member 1 [Source:MGI Symbol;Acc:MGI:2442213]	-	1543	1385	1159	1158	1262	1176	1049	1124	1033	1128	1087	1132	5.9333170560132	4.81219007278593	5.71454331829186	4.94815919469373	5.25555334459277	5.00395629276339	4.18407448045669	4.44944331888976	4.63370321190642	4.41163070037034	4.18302051585745
ENSMUSG00000021068	990.558611496821	850.674810120283	1006.699378397	990.681605865803	1014.13019828603	905.649983078009	693.262469305771	745.708689934226	690.973901300594	791.86270736753	707.452549421614	965.059058886835	959.732431207323	765.719896036095	0.325834431234397	0.00185604128776053	0.0766124349153207	Nin	12	70058209	70160491	-	17095	protein_coding	ninein [Source:MGI Symbol;Acc:MGI:105108]	-	1070	964	843	956	1018	881	717	780	647	836	756	908	2.05230813033825	1.67069507053374	2.0732554976965	2.03760573475234	2.11462824877621	1.86986069278196	1.42649492888869	1.54014328972462	1.44763585392422	1.63088555428677	1.45114030230812
ENSMUSG00000027224	362.896238978275	623.004580855726	316.459472449826	445.599467073531	329.741744236419	398.856065192131	162.438068121854	203.635834558962	260.583666023717	304.999750923857	211.487137790059	381.559693987196	412.759594797651	254.117358567608	0.701248375590928	0.00186516615235447	0.076784326788018	Duoxa1	2	122132672	122144211	-	3977	protein_coding	dual oxidase maturation factor 1 [Source:MGI Symbol;Acc:MGI:2384861]	-	392	706	265	430	331	388	168	213	244	322	226	359	3.23190338261543	5.25942628488462	2.80146137570903	3.93952836427246	2.95547819439837	3.53979884755214	1.43672573923883	1.80783854972516	2.34670441638014	2.70014193853635	1.86470253686154
ENSMUSG00000024998	448.065764452768	1539.86259715757	521.859582870091	841.457598287691	526.989071604429	565.388752205341	418.664782718827	365.206050711377	303.302299798097	445.185971845382	505.323249586867	429.387510782248	740.603894429648	411.178310907133	0.849247847193458	0.00188125420770189	0.0769185708372762	Plce1	19	38469557	38773474	+	15998	protein_coding	phospholipase C, epsilon 1 [Source:MGI Symbol;Acc:MGI:1921305]	-	484	1745	437	812	529	550	433	382	284	470	540	404	0.991990612392908	3.23161043099145	1.14844473400027	1.84936103865102	1.17420881465087	1.24738192293256	0.920539408469426	0.805996769103815	0.679010989017081	0.979757234812109	1.1076046768327
ENSMUSG00000015947	332.346300492859	96.1862596505299	204.205923731775	166.840730694973	353.650511190118	169.616625661602	94.7555397377483	101.339898888497	170.874535097519	150.605467071097	71.1195684603739	79.713027991754	220.474391903643	111.401339541165	0.985335566555079	0.00188816082207064	0.0769185708372762	Fcgr1	3	96190225	96201285	-	2589	protein_coding	Fc receptor, IgG, high affinity I [Source:MGI Symbol;Acc:MGI:95498]	-	359	109	171	161	355	165	98	106	160	159	76	75	4.54663709808916	1.24733672670138	2.77688833511054	2.26581888765399	4.8691332451009	2.31235411391369	1.28740208106958	1.3820044621779	2.36380739799373	2.04810108442538	0.963248309169624
ENSMUSG00000060131	279.57822492714	75.890076421519	263.91525815627	200.001621267887	275.947018590599	156.252891518567	63.8149553335856	91.7795310688278	173.010466786238	143.975037703187	60.8259467095303	61.6447416469564	208.597515146997	99.1751132080543	1.07264444775534	0.0018883039549173	0.0769185708372762	Atp8b4	2	126162893	126342594	-	6660	protein_coding	ATPase, class I, type 8B, member 4 [Source:MGI Symbol;Acc:MGI:1859664]	-	302	86	221	193	277	152	66	96	162	152	65	58	1.48682757450198	0.382572267056463	1.39512268567854	1.05587971604488	1.47693334776629	0.828079069742677	0.337046551450456	0.486555778015107	0.930389800348851	0.761124448553979	0.320254942525309
ENSMUSG00000053182	4.62877855839636	9.70687023996174	7.16512013093947	9.32650047363204	4.98099311535377	7.19585684624979	1.93378652526017	0	1.0679658443595	2.84161258624712	0.935783795531235	2.12568074644677	7.16735322742219	1.4841382496408	2.27479602356848	0.00192870982662159	1	Gm609	16	45232131	45313332	-	4404	protein_coding	predicted gene 609 [Source:MGI Symbol;Acc:MGI:2685455]	-	5	11	6	9	5	7	2	0	1	3	1	2	0.0372263612180647	0.0740004971288166	0.0572793783928581	0.0744606059725852	0.0403160570146417	0.0576704285449286	0.0154455318351088	0	0.00868514043115034	0.022717485423103	0.00745091146935847
ENSMUSG00000032589	93.5013268796065	315.9145041733	27.466293835268	55.9590028417922	70.7301022380235	62.7067525173196	51.2453429193945	35.3733609327774	51.2623605292558	20.8384922991455	38.3671356167806	24.4453285841379	104.379663747552	36.9220034802486	1.50235070749005	0.00193335310555726	0.0778925229968244	Bsn	9	107973221	108067583	-	15938	protein_coding	bassoon [Source:MGI Symbol;Acc:MGI:1277955]	-	101	358	23	54	71	61	53	37	48	22	41	23	0.207785598886185	0.66548529979352	0.0606720081583781	0.123450059745237	0.158190312103981	0.138866810731081	0.113099902017079	0.0783616427840712	0.115194453885163	0.0460336246219434	0.0844124970857851
ENSMUSG00000027544	405.481001715521	243.554198748131	582.763103983077	463.216190190391	477.179140450891	326.897496729633	242.690208920151	240.921269055673	336.409240973241	332.468672590913	236.753300269402	196.625469046327	416.515188636274	264.311360142618	0.65502253288361	0.00195117471989023	0.0778925229968244	Nfatc2	2	168318330	168443577	-	10578	protein_coding	nuclear factor of activated T cells, cytoplasmic, calcineurin dependent 2 [Source:MGI Symbol;Acc:MGI:102463]	RHD	438	276	488	447	479	318	251	252	315	351	253	185	1.35768319009847	0.773027211382673	1.93959303320993	1.53969722684775	1.60800467629607	1.09075197046665	0.807031228618673	0.804141745996322	1.13901946629964	1.10659796549361	0.784826523926719
ENSMUSG00000056069	378.634086076822	244.436641497218	288.993178614559	336.790294881157	455.262770743334	315.589721685526	229.15370324333	166.35040006225	330.001445907084	190.388043278557	161.890596626904	228.510680243028	336.61778224977	217.715811560192	0.630028184682759	0.00195663828023363	0.0778925229968244	Otulinl	15	27655155	27681665	-	3241	protein_coding	OTU deubiquitinase with linear linkage specificity like [Source:MGI Symbol;Acc:MGI:2687281]	-	409	277	242	325	457	307	237	174	309	201	173	215	4.13782548441728	2.53215333234468	3.1392846112825	3.6537236562296	5.00717218125667	3.43685961849265	2.48707851925813	1.81219883843408	3.6467299487087	2.06825146214876	1.75155502660057
ENSMUSG00000061080	19.4408699452647	229.435114762732	84.7872548827837	8.29022264322848	13.9467807229906	1.02797954946426	13.5365056768212	2.86811034590087	7.47576091051647	17.0496755174827	11.2294055463748	8.5027229857871	59.4880370844106	10.1103634971472	2.55669994177381	0.00195750316207537	0.0778925229968244	Lsamp	16	39804723	42002042	+	17213	protein_coding	limbic system-associated membrane protein [Source:MGI Symbol;Acc:MGI:1261760]	-	21	260	71	8	14	1	14	3	7	18	12	8	0.0400028210177365	0.447513397550372	0.17341878380093	0.0169342039261419	0.0288819707348487	0.00210787998532559	0.0276625141121673	0.00588301988609737	0.0155548428055251	0.0348740390879029	0.0228760686302595
ENSMUSG00000029875	2.77726713503782	125.306870370415	3.58256006546973	11.3990561344392	22.9125683306273	23.6435296376779	5.80135957578051	0	6.40779506615697	8.52483775874135	3.74313518212494	6.37704223934032	31.6036419456112	5.14236163702402	2.62566219984048	0.00197437392002689	0.0779625865002454	Ccdc184	15	98065039	98068015	+	2977	protein_coding	coiled-coil domain containing 184 [Source:MGI Symbol;Acc:MGI:2146066]	-	3	142	3	11	23	23	6	0	6	9	4	6	0.0330423032860645	1.41318419667309	0.0423678841857821	0.134631045263163	0.274349616871152	0.280318299734772	0.0685476542174867	0	0.0770897382441104	0.100820765001692	0.0440897737467984
ENSMUSG00000068794	463.803611551315	162.369465832087	431.101394544858	298.448015156225	441.315990020344	316.617701234991	126.663017404541	131.93307591144	232.81655407037	274.689216670555	140.367569329685	260.39589143973	352.276029723303	194.47755413772	0.857264784240751	0.0019963475805074	0.0786296798948447	Col28a1	6	7997808	8192617	-	4904	protein_coding	collagen, type XXVIII, alpha 1 [Source:MGI Symbol;Acc:MGI:2685312]	-	501	184	361	288	443	308	131	138	218	290	150	245	3.34977130085574	1.11162069630314	3.09493189442683	2.13980103558411	3.2078098852353	2.2787815990461	0.908533646863614	0.949870183477187	1.70031813703413	1.97212232755371	1.00368517876391
ENSMUSG00000029461	1650.62243392414	1477.20916197236	1705.29859116359	1855.97359425278	1747.3323848661	1563.55689473513	1236.65648290388	1183.57353607509	1521.85132821228	1493.74101617057	1239.91352907889	1447.58858833025	1666.66551015235	1353.88741346183	0.299908650004763	0.00205646607106734	0.080346437299041	Fam168a	7	100355842	100490863	+	7252	protein_coding	family with sequence similarity 168, member A [Source:MGI Symbol;Acc:MGI:2442372]	-	1783	1674	1428	1791	1754	1521	1279	1238	1425	1577	1325	1362	8.06160362482538	6.83891050720536	8.2787500029276	8.99848003749997	8.58869440353596	7.60981094636648	5.99836557474675	5.76233469243656	7.51590399941674	7.25204034527835	5.99535351587803
ENSMUSG00000042680	77.7634797810588	183.548091810186	108.670988652582	99.4826717187418	77.7034925995188	90.4622003528545	53.1791294446547	30.5931770229426	61.9420189728507	76.7235398286721	34.6240004346557	79.713027991754	106.271820819157	56.129148949255	0.924080264391658	0.0020651874917719	0.080346437299041	Garem1	18	21260258	21433195	-	6233	protein_coding	GRB2 associated regulator of MAPK1 subtype 1 [Source:MGI Symbol;Acc:MGI:2685790]	-	84	208	91	96	78	88	55	32	58	81	37	75	0.44188580662814	0.988679366216532	0.613816589182185	0.561184249345125	0.444378289016962	0.512257109015246	0.300113646807321	0.17329597740952	0.355922154758478	0.433385329165783	0.194787601814379
ENSMUSG00000023940	53.6938312773978	23.8259542253606	48.9616542280864	44.5599467073531	44.8289380381839	28.7834273849992	13.5365056768212	15.2965885114713	30.9710094864254	24.6273090808083	12.1651893419061	24.4453285841379	40.7756253102302	20.173655113595	1.01878271094469	0.00206730559342044	0.080346437299041	Sgo1	17	53981814	53996361	-	3810	protein_coding	shugoshin 1 [Source:MGI Symbol;Acc:MGI:1919665]	-	58	27	41	43	45	28	14	16	29	26	13	23	0.499149810952898	0.209955884337707	0.452431919515662	0.4112205854255	0.419413972659407	0.266646264894347	0.124975027667385	0.141752470760307	0.291136849161364	0.227580310663778	0.111963145260817
ENSMUSG00000069601	38.8817398905294	979.511451487048	807.27020141918	84.9747820930919	46.8213352843254	66.8186707151766	87.0203936367077	21.98884598524	57.6701555954128	76.7235398286721	59.890162913999	45.7021360486056	337.379696814892	58.1658723347729	2.5359838080453	0.00208739218755113	0.080346437299041	Ank3	10	69234603	69863268	+	34838	protein_coding	ankyrin 3, epithelial [Source:MGI Symbol;Acc:MGI:88026]	-	42	1110	676	82	47	65	90	23	54	81	64	43	0.0395297409827372	0.943971812869938	0.815807769920256	0.0857614281776213	0.0479071129763285	0.0676959349612954	0.08786369766008	0.0222848775272792	0.0592877133237973	0.0775386289881832	0.0602814198033039
ENSMUSG00000037416	920.201177409196	888.619848331043	948.18423066099	954.411881801679	858.72321308699	896.398167132831	658.454311851088	694.08270370801	820.197768468093	689.564654262633	785.122604450706	864.089223430614	911.089753070455	751.918544361857	0.277418122217832	0.00209483195909606	0.080346437299041	Dmxl1	18	49965737	50098540	+	21923	protein_coding	Dmx-like 1 [Source:MGI Symbol;Acc:MGI:2443926]	-	994	1007	794	921	862	872	681	726	768	728	839	813	1.48666902737336	1.36087660813175	1.52270184782393	1.53070328227436	1.39624823983688	1.44317484374497	1.05649466814393	1.11782100782071	1.33994012207945	1.10743363324416	1.2557948291372
ENSMUSG00000045216	934.087513084385	1016.57404694872	932.659803710621	657.000144475857	786.000713602825	611.647831931232	684.5604299421	489.490832367082	705.925423121627	623.260360583534	511.873736155586	506.974858027556	822.99500895894	587.014273366247	0.487836651976539	0.00209484921232216	0.080346437299041	Hs6st1	1	36107481	36145527	+	5542	protein_coding	heparan sulfate 6-O-sulfotransferase 1 [Source:MGI Symbol;Acc:MGI:1354958]	-	1009	1152	781	634	789	595	708	512	661	658	547	477	5.96970042791758	6.1585038899202	5.92487058484653	4.16825330842997	5.05552006524607	3.89540747410837	4.34497135681054	3.11845204530794	4.5620400471414	3.95954867187545	3.23875068905574
ENSMUSG00000024843	349.009903303085	843.615268127584	374.974620185832	391.713019892546	319.779758005712	379.32445375231	279.432152900095	282.986887462219	276.603153689109	271.847604084307	265.762597930871	289.092581516761	443.069503877845	277.620829597227	0.675486382601904	0.00209591306927953	0.080346437299041	Chka	19	3901773	3944369	+	12024	protein_coding	choline kinase alpha [Source:MGI Symbol;Acc:MGI:107760]	-	377	956	314	378	321	369	289	296	259	287	284	272	1.02806429376651	2.35558178358189	1.09793097259417	1.14544489068007	0.948006732280219	1.11347340245792	0.817464791929714	0.830956661804741	0.823900851698736	0.796011318073856	0.775043513601092
ENSMUSG00000025008	206.443523704478	281.49923695889	219.730350682144	230.05367834959	272.958422721387	216.903684936958	168.239427697635	186.427172483557	155.923013276486	173.338367761074	207.744002607934	191.31126718021	237.931482892241	180.497208501149	0.399223826658512	0.00210058838240337	0.080346437299041	Tctn3	19	40584890	40600677	-	3273	protein_coding	tectonic family member 3 [Source:MGI Symbol;Acc:MGI:1914840]	-	223	319	184	222	274	211	174	195	146	183	222	180	2.23401842599276	2.88757943516772	2.36355750938767	2.47137321968038	2.97276044823343	2.33904673313272	1.80810407319226	2.01105633500171	1.70620419645059	1.86462455056647	2.22568491679014
ENSMUSG00000054400	150.898181003721	157.074809337563	113.447735406542	115.026839174795	152.418389329825	135.693300529282	108.29204541457	76.4829425573565	77.9615066382432	91.8788069553234	119.780325827998	102.032675829445	137.426542463621	96.0713838704893	0.518278366383137	0.0021022228248667	0.080346437299041	Cklf	8	104977493	104991570	+	6124	protein_coding	chemokine-like factor [Source:MGI Symbol;Acc:MGI:1922708]	-	163	178	95	111	153	132	112	80	73	97	128	96	0.872730824726001	0.86114063454137	0.652202980949378	0.660418398760114	0.887179719436636	0.782062024940895	0.622018099820686	0.440951105157388	0.45594434478958	0.528229760664299	0.685853724071685
ENSMUSG00000050505	4.62877855839636	10.5893129890492	21.4953603928184	12.4353339648427	18.9277738383443	7.19585684624979	1.93378652526017	5.73622069180174	0	3.78881678166282	4.67891897765618	3.18852111967016	12.5454027649501	3.22104401600851	1.94019364368812	0.00210444180938556	1	Pcdh20	14	88702179	88708832	-	5492	protein_coding	protocadherin 20 [Source:MGI Symbol;Acc:MGI:2443376]	-	5	12	18	12	19	7	2	6	0	4	5	3	0.0298515831763213	0.0647351233573412	0.13779591174917	0.0796126508140969	0.122850924499532	0.0462455512221168	0.0123856741081244	0.0368770652947538	0	0.0242893434822397	0.0298741934732836
ENSMUSG00000066687	2300.50294352299	1428.67481077255	2254.62446786895	3897.44092014779	2234.4735115477	2861.89506570849	1306.27279781324	833.664073875186	1631.85181018131	1905.7748411764	1459.82272102873	1944.9978829988	2496.26861992808	1513.73068784561	0.721660789078743	0.00211443158766224	0.0806140062695169	Zbtb16	9	48565597	48747522	-	5283	protein_coding	zinc finger and BTB domain containing 16 [Source:MGI Symbol;Acc:MGI:103222]	ZBTB	2485	1619	1888	3761	2243	2784	1351	872	1528	2012	1560	1830	15.4231710614737	9.07936552176353	15.0250434112806	25.9390514066709	15.0766210695604	19.1201400556025	8.69750966256463	5.57149191577207	11.0628468152612	12.700876097945	9.68948514352552
ENSMUSG00000027496	146.269402445325	82.9496184142185	96.7291217676828	66.3217811458279	129.505820999198	89.4342208033902	63.8149553335856	48.7578758803148	85.4372675487596	68.1987020699308	52.4038925497492	47.8278167950524	101.86832759594	61.0734183628987	0.740251675290558	0.00212400011142314	0.0807798469894809	Aurka	2	172198110	172212455	-	2531	protein_coding	aurora kinase A [Source:MGI Symbol;Acc:MGI:894678]	-	158	94	81	64	130	87	66	51	80	72	56	45	2.04688213189161	1.10033511006785	1.34551092965981	0.92133845019575	1.82392326843324	1.24718120201684	0.88689452100357	0.680164030853299	1.20898801924255	0.948695116270364	0.726026704946291
ENSMUSG00000022408	129.605799635098	448.280916536415	78.8163214403341	40.4148353857388	72.722499484165	81.2103844076762	67.682528384106	31.5492138049096	82.2333700156812	46.4130055753696	29.0092976614683	40.3879341824887	141.841792814905	49.5458916040039	1.52015330380317	0.00214155743954218	0.0812479598202779	Fam83f	15	80556048	80584626	+	2993	protein_coding	family with sequence similarity 83, member F [Source:MGI Symbol;Acc:MGI:2146227]	-	140	508	66	39	73	79	70	33	77	49	31	38	1.53373105730771	5.02859035302058	0.927110660495695	0.474776546735989	0.866106902890157	0.957685304645955	0.795447469784054	0.372171277745852	0.984029602848824	0.545978670716553	0.339869107064048
ENSMUSG00000055978	13.8863356751891	56.4763359415956	22.6895470813083	14.5078896256498	20.9201710844858	17.4756523408923	4.83446631315042	4.78018390983478	7.47576091051647	7.57763356332564	11.2294055463748	15.9426055983508	24.3259886248535	8.64000930692549	1.50319684868933	0.00215727805335153	0.0816442713638835	Fut2	7	45298015	45315818	-	5431	protein_coding	fucosyltransferase 2 [Source:MGI Symbol;Acc:MGI:109374]	-	15	64	19	14	21	17	5	5	7	8	12	15	0.0905606121180391	0.349131821006339	0.147084921941963	0.093924653160779	0.137307686133019	0.11357207681568	0.0313119693434999	0.0310760514636329	0.049299486137268	0.0491243139033182	0.0725033638984821
ENSMUSG00000042345	27.7726713503782	15.8839694835738	26.272107146778	15.5441674560534	18.9277738383443	9.2518159451783	9.66893262630085	6.6922574737687	3.20389753307849	12.3136545404042	6.55048656871864	5.31420186611694	18.9420842033843	7.29057176806463	1.36659714250376	0.00217838604597174	1	Ubash3a	17	31426847	31465866	+	11239	protein_coding	ubiquitin associated and SH3 domain containing, A [Source:MGI Symbol;Acc:MGI:1926074]	-	30	18	22	15	19	9	10	7	3	13	7	5	0.0875228551317859	0.0474497683261658	0.0822980160412734	0.0486289570103012	0.0600317890694397	0.0290547596482502	0.030261643474428	0.0210235474418174	0.0102098118494847	0.038574650041329	0.0204374676374573
ENSMUSG00000108064	11.1090685401513	6.17709924361201	5.97093344244956	12.4353339648427	21.9163697075566	12.3357545935711	3.86757305052034	0	2.13593168871899	1.89440839083141	1.87156759106247	7.43988261256371	11.6574265820305	2.86822722228282	2.04125276051516	0.00218757276025603	1	Gm44423	6	87773052	87776209	-	3158	TEC	predicted gene, 44423 [Source:MGI Symbol;Acc:MGI:5690815]	-	12	7	5	12	22	12	4	0	2	2	2	7	0.124593966919081	0.0656712339653163	0.0665659653900535	0.138452399705833	0.247380755670336	0.137870569426508	0.0430792414197715	0	0.0242237862310235	0.0211204994307252	0.0207813895573494
ENSMUSG00000061751	262.914622116913	292.970992697027	437.072327987308	296.375459495418	332.730340105632	347.457087718918	183.709719899716	198.855650649127	184.758091074193	254.797928566825	181.54205633306	326.29199457958	328.253471686869	221.65924018375	0.565815521590327	0.00219715896172364	0.0827489624538206	Kalrn	16	33789443	34393902	-	24050	protein_coding	kalirin, RhoGEF kinase [Source:MGI Symbol;Acc:MGI:2685385]	-	284	332	366	286	334	338	190	208	173	269	194	307	0.38719625883108	0.408989600702938	0.639823755882369	0.433293645133444	0.493158749612383	0.509922374525754	0.26869445360386	0.291933466809064	0.27514091531684	0.373012609301454	0.264693552496657
ENSMUSG00000006143	3.70302284671709	41.4748092071092	0	2.07255566080712	3.98479449228301	0	0	0	0	0.947204195415705	0	0	8.53919703448608	0.157867365902618	5.07942284975351	0.00220153457428013	1	Upk3bl	5	136083346	136093180	+	1303	protein_coding	uroplakin 3B-like [Source:MGI Symbol;Acc:MGI:1916915]	-	4	47	0	2	4	0	0	0	0	1	0	0	0.100656880923627	1.06866775271747	0	0.0559264106256102	0.109011152781263	0	0	0	0	0.0255942199548082	0
ENSMUSG00000081179	34.2529613321331	26.4732824726229	19.1069870158386	26.9432235904926	26.8973628229103	24.6715091871421	10.6358258889309	20.0767724213061	11.7476242879545	14.2080629312356	12.1651893419061	13.816924851904	26.3908877368566	13.7750666205395	0.941810928230646	0.00223177573352549	0.0832437443750169	Gm13136	4	147819934	147822883	-	2950	processed_pseudogene	predicted gene 13136 [Source:MGI Symbol;Acc:MGI:3649290]	-	37	30	16	26	27	24	11	21	11	15	13	13	0.411251600526183	0.301292624981795	0.22803017621889	0.321131345622783	0.325010285254035	0.295183225931466	0.126820905800002	0.240288457320596	0.142624726456491	0.16957255220906	0.144603248624987
ENSMUSG00000073492	34.2529613321331	25.5908397235355	54.9325876705359	39.3785575553353	89.6578760763678	27.7554478355349	3.86757305052034	15.2965885114713	26.6991461089874	22.7329006899769	14.9725407284998	24.4453285841379	45.2613783655737	18.0023462789323	1.33208660338121	0.00223313229014852	0.0832437443750169	Gm10521	1	171723231	171725804	+	2574	protein_coding	predicted gene 10521 [Source:MGI Symbol;Acc:MGI:3642358]	-	37	29	46	38	90	27	4	16	25	24	16	23	0.471325649398695	0.333794147464291	0.751352343456278	0.537906040348963	1.24162178386351	0.380590260707091	0.0528532418040554	0.209820090752435	0.371497265528226	0.310948891385689	0.203970872485188
ENSMUSG00000029304	315.682697682632	43.2396947052841	176.739629896507	120.208228326813	229.125683306273	116.161689089461	64.7818485962157	62.1423908278522	119.612174568263	72.9347230470093	10.2936217508436	35.0737323163718	166.859603834495	60.806415184426	1.45721959324342	0.00223718571354784	0.0832437443750169	Spp1	5	104582984	104588916	+	1648	protein_coding	secreted phosphoprotein 1 [Source:MGI Symbol;Acc:MGI:98389]	-	341	49	148	116	230	113	67	65	112	77	11	33	6.7846127582871	0.880903093469224	3.77571203493505	2.56467388144409	4.95593937758142	2.48784709658814	1.38273124621417	1.33134858099931	2.59947096321847	1.55818791400841	0.219024244673302
ENSMUSG00000052496	2.77726713503782	22.9435114762732	16.7186136388588	7.25394481282492	3.98479449228301	3.08393864839277	3.86757305052034	0	2.13593168871899	0	0	0	9.46034503394508	1.00058412320656	3.25048624171815	0.0022615780950245	1	Pkdrej	15	85698871	85705935	-	7065	protein_coding	polycystin (PKD) family receptor for egg jelly [Source:MGI Symbol;Acc:MGI:1338786]	-	3	26	14	7	4	3	4	0	2	0	0	0	0.0139231333167182	0.10903111269688	0.0833125113043184	0.0361008344880531	0.0201049585384269	0.0154067678078172	0.0192560855489934	0	0.0108278438666061	0	0
ENSMUSG00000025936	21.2923813686233	82.9496184142185	34.6314139662074	66.3217811458279	32.8745545613349	42.1471615280345	18.3709719899716	22.944882767207	6.40779506615697	5.68322517249423	18.7156759106247	34.0108919431484	46.7028184973744	17.6889071416005	1.40359360740547	0.00227041454311737	0.0837823241631915	Gm4956	1	21355457	21395963	-	3214	transcribed_unprocessed_pseudogene	predicted gene 4956 [Source:MGI Symbol;Acc:MGI:3647976]	-	23	94	29	64	33	41	19	24	6	6	20	32	0.234644217828264	0.86650534025567	0.379355584464959	0.725546862926398	0.364605675049901	0.462850176006156	0.201061033266112	0.252058298193887	0.0714051495808079	0.0622575020555977	0.204192993846016
ENSMUSG00000097633	4.62877855839636	12.354198487224	13.136053573389	17.6167231168605	17.9315752152736	10.2797954946426	0.966893262630085	9.56036781966956	0	1.89440839083141	0.935783795531235	3.18852111967016	12.6578540742977	2.75766239805541	2.18823882854999	0.00231447804593682	1	Gm16617	14	52223882	52226284	-	675	lncRNA	predicted gene, 16617 [Source:MGI Symbol;Acc:MGI:4439541]	-	5	14	11	17	18	10	1	10	0	2	1	3	0.242881325636084	0.614488168481389	0.685146223916942	0.917648830939179	0.946943547159905	0.537525010183843	0.0503867571865328	0.500071216293304	0	0.0988126477070078	0.0486130579423033
ENSMUSG00000006731	403.629490292163	287.676336202502	396.469980578651	348.189351015596	403.460442343655	254.938928267135	279.432152900095	173.042657536019	316.117889930411	250.061907589746	202.129299834747	150.923332997721	349.060754783284	228.61787346479	0.610401112356088	0.00231661623687238	0.0845728837984612	B4galnt1	10	127001094	127008199	+	3454	protein_coding	beta-1,4-N-acetyl-galactosaminyl transferase 1 [Source:MGI Symbol;Acc:MGI:1342057]	-	436	326	332	336	405	248	289	181	296	264	216	142	4.13896781324259	2.79630493577487	4.04119778859259	3.54444556791794	4.16378260639579	2.60514437477635	2.84574309732568	1.76885352781223	3.2778836432544	2.54898868288778	2.05205091140354
ENSMUSG00000045767	2025.55349715425	2030.50076565018	1893.980087945	2066.3379938247	2033.24138968741	1743.45331589138	1542.19475389499	1560.25202817007	1629.71587849259	1766.53582445029	1684.41083195622	1849.34224940869	1965.51117502548	1672.07526106214	0.233593324641852	0.00235739743893097	0.0852016729971279	B230219D22Rik	13	55840937	55851313	+	4652	protein_coding	RIKEN cDNA B230219D22 gene [Source:MGI Symbol;Acc:MGI:1925771]	-	2188	2301	1586	1994	2041	1696	1595	1632	1526	1865	1800	1740	15.421815555973	14.6543370145111	14.3336842416611	15.6176906074881	15.5796843810729	13.2278295713341	11.6611441220875	11.8417551992413	12.5469735615021	13.3698164103783	12.696660662059
ENSMUSG00000056737	2702.28092239179	1851.36488758543	1872.48472755218	1222.8078398762	2176.6939914096	1607.7600153621	1067.45016194361	1087.01382109643	1930.88224660197	1333.66350714531	907.710281665298	983.127345231633	1905.56539736288	1218.30789394738	0.645580328142153	0.00236136169751068	0.0852016729971279	Capg	6	72521374	72539966	+	2529	protein_coding	capping protein (actin filament), gelsolin-like [Source:MGI Symbol;Acc:MGI:1098259]	-	2919	2098	1568	1180	2185	1564	1104	1137	1808	1408	970	925	37.8454051351457	24.5779647459447	26.067032006675	17.0006115842825	30.6801846166132	22.4383215994892	14.8470587012275	15.1756487435628	27.3447370871828	18.5669316687901	12.5857650010767
ENSMUSG00000044162	218.478347956308	50.2992366979835	148.079149372749	104.66406087076	189.277738383443	107.937852693747	48.3446631315042	63.0984276098191	91.8450626149166	99.4564405186491	23.3945948882809	45.7021360486056	136.456064329165	61.9735541352959	1.13901684390234	0.00238247815634832	0.0852528160101483	Tnip3	6	65502297	65611024	+	10916	protein_coding	TNFAIP3 interacting protein 3 [Source:MGI Symbol;Acc:MGI:3041165]	-	236	57	124	101	190	105	50	66	86	105	25	43	0.708885950418252	0.154703660958498	0.477587019403112	0.337123644996435	0.618081052905306	0.34900224529846	0.155785365980715	0.204087327646269	0.301341592841298	0.320783547372397	0.0751507285430897
ENSMUSG00000054717	503.611107153524	402.393893583868	380.945553628282	312.955904781875	429.361606543495	318.673660333919	291.034872051656	230.404864454036	297.962470576299	360.884798453384	265.762597930871	246.578966587826	391.323621004161	282.104761675679	0.472697657219325	0.00238401195251059	0.0852528160101483	Hmgb2	8	57964941	57969033	+	3003	protein_coding	high mobility group box 2 [Source:MGI Symbol;Acc:MGI:96157]	HMG	544	456	319	302	431	310	301	241	279	381	284	232	5.93979505651483	4.49882161311478	4.46611299805999	3.66423212448241	5.09656179852546	3.74549145457773	3.40903409636157	2.70892724310733	3.55363669996714	4.23112598635527	3.1032711313818
ENSMUSG00000060090	719.312187974794	602.708397626715	610.229397818345	541.973305301062	701.323830641811	488.290285995521	427.366822082498	510.523641570355	482.720561650492	512.437469719897	471.635032947742	475.089646830854	610.639567559708	479.962195800306	0.347816653830739	0.00239611535256451	0.0854596072404286	Rp2	X	20230720	20271892	+	5141	protein_coding	retinitis pigmentosa 2 homolog [Source:MGI Symbol;Acc:MGI:1277953]	-	777	683	511	523	704	475	442	534	452	541	504	447	4.9556577810926	3.9360659109419	4.17895459469419	3.70668305024547	4.86273286228778	3.35234305368984	2.92411768266914	3.5061402433947	3.36290799909965	3.50942507551124	3.2169154467947
ENSMUSG00000004530	2990.19094872405	2687.03817097123	2465.99551173167	2105.71655138003	2928.82395182802	2586.39654645207	1731.70583337048	2139.61031804205	2209.6213319798	2448.5228451496	1750.85148143894	1986.44865755451	2627.36028018118	2044.46007792256	0.362072568145868	0.00241534515425237	0.0856641870252986	Coro1c	5	113980497	114046819	-	9664	protein_coding	coronin, actin binding protein 1C [Source:MGI Symbol;Acc:MGI:1345964]	-	3230	3045	2065	2032	2940	2516	1791	2238	2069	2585	1871	1869	10.9590647810032	9.33511426274565	8.98374654634095	7.66122380524553	10.8030345689548	9.44617885756643	6.30316747017065	7.81697623027193	8.18894067169169	8.92051524564183	6.35292282717129
ENSMUSG00000022488	2259.7696922091	765.077863458802	1743.51256519527	1415.55551633126	2263.36327161675	1282.91847773139	610.109648719584	881.465912973534	1474.86083106046	1126.22578834927	611.066818481896	804.570162530104	1621.69956442376	918.049860352476	0.820949822875818	0.00241845401705895	0.0856641870252986	Nckap1l	15	103362221	103407237	+	5935	protein_coding	NCK associated protein 1 like [Source:MGI Symbol;Acc:MGI:1926063]	-	2441	867	1460	1366	2272	1248	631	922	1381	1189	653	757	13.4857451800315	4.32800383198364	10.3425228409305	8.38612522491174	13.593865243138	7.629504104109	3.61600329480606	5.24379648627022	8.90014558240667	6.68109188992854	3.61034888197451
ENSMUSG00000031289	192.557188029289	142.073282603076	130.1663490454	253.888068448872	206.213114975646	149.057034672317	19.3378652526017	64.0544643917861	136.699628078015	92.8260111507391	4.67891897765618	65.89610313985	178.992506295767	63.9154984984414	1.48723163293254	0.00242498738162999	0.0856994969868734	Il13ra2	X	146166472	146212188	-	2281	protein_coding	interleukin 13 receptor, alpha 2 [Source:MGI Symbol;Acc:MGI:1277954]	-	208	161	109	245	207	145	20	67	128	98	5	62	2.98996388595407	2.09117247165137	2.00907231376546	3.91356152916849	3.22255558300253	2.30645595667442	0.298211846566503	0.991482716215023	2.14639100514012	1.43280505169193	0.0719285710457139
ENSMUSG00000038664	1794.11456923443	1566.33587963019	1657.531123624	1846.64709377914	1599.89498865163	1661.21495193424	1371.05464640946	1246.67196368491	1395.83135857786	1380.07651272068	1466.37320759745	1629.33429215145	1687.62310114227	1414.8903301903	0.254481627926202	0.00244644286986645	0.0858695899833622	Herc1	9	66257732	66416057	+	27464	protein_coding	HECT and RLD domain containing E3 ubiquitin protein ligase family member 1 [Source:MGI Symbol;Acc:MGI:2384589]	-	1938	1775	1388	1782	1606	1616	1418	1304	1307	1457	1567	1533	2.31375769101983	1.91480181032251	2.12480965888496	2.36415135170574	2.07652472792402	2.13491217997574	1.75603279351478	1.60268964674252	1.82027059079644	1.76922095659135	1.8722417241488
ENSMUSG00000024677	474.912680091466	245.319084246306	382.139740316772	452.853411886356	524.996674358287	340.261230872669	220.451663879659	241.87730583764	338.54517266196	277.530829256802	115.101406850342	267.835774052294	403.413803628643	243.557025423116	0.728578554851456	0.00245323448626662	0.08591315975774	Ms4a6b	19	11493876	11508620	+	4485	protein_coding	membrane-spanning 4-domains, subfamily A, member 6B [Source:MGI Symbol;Acc:MGI:1917024]	-	513	278	320	437	527	331	228	253	317	293	123	252	3.75044508515652	1.83641829615437	2.99972807066098	3.55017986630316	4.17256897452567	2.67773746711985	1.7289903971031	1.90411732357835	2.70346636152401	2.17867016725234	0.899910621105848
ENSMUSG00000042473	431.402161642541	455.340458529114	496.781662411803	545.082138792273	529.977667473641	468.758674555701	271.697006799054	347.041351854005	359.90448954915	401.614578856259	354.662058506338	474.026806457631	487.890460567512	368.157715337073	0.406418886405152	0.00247871722785648	0.0862203684718887	Tbc1d8b	X	138585745	138654154	+	5211	protein_coding	TBC1 domain family, member 8B [Source:MGI Symbol;Acc:MGI:1918101]	-	466	516	416	526	532	456	281	363	337	424	379	446	2.93219424213511	2.93371479400811	3.35634513835902	3.67786715234691	3.62531640104397	3.17501819486829	1.83402574733364	2.35137113360712	2.4736199962792	2.71350794221317	2.38657369949908
ENSMUSG00000120977	4.62877855839636	7.94198474178688	3.58256006546973	11.3990561344392	12.9505820999198	8.22383639571404	0	0	4.27186337743798	0.947204195415705	2.80735138659371	1.06284037322339	8.12113299928766	1.51487655544513	2.44392613031984	0.00250161357846922	1	ENSMUSG00000120977	7	89693384	89696264	-	840	lncRNA	novel transcript	-	5	9	3	11	13	8	0	0	4	1	3	1	0.195172493814711	0.317433301320105	0.150153799072707	0.477138835414804	0.549565451476731	0.345551792261042	0	0	0.182139802184696	0.0397015102394228	0.117192193253767
ENSMUSG00000086671	9.25755711679272	10.5893129890492	1.19418668848991	6.21766698242136	4.98099311535377	2.05595909892851	0	0	0	1.89440839083141	0.935783795531235	0	5.71594599850591	0.471698697727108	3.55312887194984	0.00256419382168343	1	Gm13618	2	66018180	66023157	+	384	lncRNA	predicted gene 13618 [Source:MGI Symbol;Acc:MGI:3650299]	-	10	12	1	6	5	2	0	0	0	2	1	0	0.853879660439359	0.925847128850307	0.109487145157182	0.569313383165391	0.462374778886672	0.188973636392757	0	0	0	0.173694107297475	0.0854526409142049
ENSMUSG00000031659	1604.33464834018	741.251909233442	1302.85767714249	1229.02550685862	1562.03944097494	1034.14742676104	656.520525325828	699.818924399812	1212.14123334803	926.36570311656	539.011466225991	686.594881102308	1245.60943488512	786.742122253088	0.663026276897415	0.00258221577339327	0.0884294645052089	Adcy7	8	88999031	89056590	+	6733	protein_coding	adenylate cyclase 7 [Source:MGI Symbol;Acc:MGI:102891]	-	1733	840	1091	1186	1568	1006	679	732	1135	978	576	646	8.4395218385846	3.6962380548784	6.81256238537508	6.41811421888992	8.26975799391095	5.42115488141005	3.42989907730843	3.66976367103106	6.44779769058699	4.84413852545531	2.80718207752376
ENSMUSG00000110980	11.1090685401513	59.1236641888579	16.7186136388588	3.10883349121068	4.98099311535377	6.16787729678553	0	5.73622069180174	1.0679658443595	2.84161258624712	2.80735138659371	5.31420186611694	16.868175045203	2.96122539585317	2.51548320807028	0.00260699279717635	1	Gm47204	9	44388009	44391094	-	3086	lncRNA	predicted gene, 47204 [Source:MGI Symbol;Acc:MGI:6096003]	-	12	67	14	3	5	6	0	6	1	3	3	5	0.127500890320952	0.643232742791659	0.190733276851915	0.0354206641502771	0.0575346452017117	0.0705436257694285	0	0.0656282704467881	0.0123944777896261	0.0324198981864373	0.0318993656296708
ENSMUSG00000024780	1212.73998229985	1306.0152686494	1407.94610572961	1445.60757341297	1024.09218451673	1323.0096801605	1055.84744279205	1049.72838659972	1017.7714496746	1047.60784012977	1073.34401347433	1111.73103039166	1286.56846579484	1059.33836051035	0.279975467972172	0.00263157672102028	0.0895256616806	Cdc37l1	19	28967752	29004081	+	12214	protein_coding	cell division cycle 37-like 1 [Source:MGI Symbol;Acc:MGI:1914322]	-	1310	1480	1179	1395	1028	1287	1092	1098	953	1106	1147	1046	3.51674819377284	3.58998853957349	4.05835697968576	4.16147853684347	2.98875665163045	3.82316533872572	3.04077932881884	3.03445048269021	2.98441449248593	3.01983716004858	3.08150030992138
ENSMUSG00000027750	10735.9889883445	5850.59542644966	9121.19792668594	8859.13917212004	9543.58280901782	6408.42451136017	4612.08086274551	5539.27711471655	8396.34746835435	5662.38668019509	5101.89325323629	5568.22071531732	8419.82147232969	5813.36768242752	0.534440210632985	0.00264428044054665	0.0897605634632054	Postn	3	54268530	54298458	+	8702	protein_coding	periostin, osteoblast specific factor [Source:MGI Symbol;Acc:MGI:1926321]	-	11597	6630	7638	8549	9580	6234	4770	5794	7862	5978	5452	5239	43.6972867167577	22.5727105098691	36.9024271258163	35.7954317641438	39.0932508983218	25.9926265985188	18.6431580615191	22.4747589446368	34.5571657323577	22.9098974600628	20.5585973952505
ENSMUSG00000104339	8.33180140511345	15.0015267344863	3.58256006546973	2.07255566080712	3.98479449228301	0	0	0	0	0	0.935783795531235	1.06284037322339	5.49553972635994	0.33310402812577	3.96634248041555	0.00266253601332962	1	C130089K02Rik	3	51964706	51971665	-	6960	TEC	RIKEN cDNA C130089K02 gene [Source:MGI Symbol;Acc:MGI:2444420]	-	9	17	3	2	4	0	0	0	0	0	1	1	0.0423995417597475	0.0723650629446217	0.0181220102329129	0.0104701311846509	0.0204082661025842	0	0	0	0	0	0.004714628464232
ENSMUSG00000027715	417.515825967352	120.012213875891	185.098936715936	193.783954285466	365.604894666967	194.288134848744	79.285247535667	86.999347158993	158.058944965205	214.068148163949	53.3396763452804	115.849600681349	246.050660060059	117.933494141741	1.06168989575247	0.00267380828600086	0.0905642854682872	Ccna2	3	36619014	36626299	-	4083	protein_coding	cyclin A2 [Source:MGI Symbol;Acc:MGI:108069]	-	451	136	155	187	367	189	82	91	148	226	57	109	3.6218049256314	0.9868446497077	1.59605066856612	1.66875889535229	3.19184682042327	1.67951881396531	0.683053394630074	0.752311399971006	1.38645727452862	1.84593061568749	0.458091453423982
ENSMUSG00000085069	57.3968541241149	35.2977099634972	35.8256006546973	96.3738382275311	16.9353765922028	21.5875705387494	29.0067978789025	20.0767724213061	10.679658443595	19.8912881037298	7.48627036424988	12.7540844786806	43.9028250167988	16.649145281744	1.3968892259986	0.00271792990306962	0.0916214176589792	Prdm16os	4	154722033	154729181	+	3542	lncRNA	Prdm16 opposite strand transcript [Source:MGI Symbol;Acc:MGI:3651882]	-	62	40	30	93	17	21	30	21	10	21	8	12	0.573945989715987	0.334580554751099	0.356095966180332	0.95667793805771	0.170433797660768	0.215116234312704	0.288066581882352	0.200127314820937	0.107988025010689	0.197722936370248	0.0741136400023821
ENSMUSG00000063358	3395.67195043957	4179.24885967807	3678.09500054893	3793.81313710743	3554.43668711645	3340.93353575883	3034.11105813321	3169.26193222046	3160.11093345975	3247.96318608045	3161.07766130451	3192.77248116305	3657.03319510821	3160.88287539357	0.210455662094818	0.00273106478969555	0.0917009802162635	Mapk1	16	16801246	16865317	+	7110	protein_coding	mitogen-activated protein kinase 1 [Source:MGI Symbol;Acc:MGI:1346858]	-	3668	4736	3080	3661	3568	3250	3138	3315	2959	3429	3378	3004	16.9156082740473	19.7347375628019	18.2127477243744	18.7612381053704	17.8201190731358	16.5850280040901	15.0107889922158	15.7380007785978	15.9184038930447	16.083634603829	15.5900230755475
ENSMUSG00000111394	215.70108082127	595.648855634016	238.837337697982	263.214568922504	222.152292944778	224.099541783208	193.378652526017	100.38386210653	161.262842498284	170.496755174827	169.376866991154	208.316713151784	293.275612967293	167.202615408099	0.812125569296914	0.00275000713110324	0.0921371436847338	Gm49759	9	59580097	59583983	+	3887	TEC	predicted gene, 49759 [Source:MGI Symbol;Acc:MGI:6215263]	-	233	675	200	254	223	218	200	105	151	180	181	196	1.9654829168724	5.14491844177171	2.16326543557282	2.38095146815966	2.03725634502822	2.0349062322756	1.74999028046872	0.911822676994801	1.48588966485122	1.54434482845401	1.5279908294574
ENSMUSG00000039218	8422.52546485802	17132.6259735325	8890.71989580739	11200.0907910017	9253.68900970423	8041.88401545887	6273.20348794399	5779.24234699025	5982.74466010189	8046.49964005642	7285.07684821067	8990.56671709663	10490.2558583938	7059.55561673331	0.571446778444691	0.00276686466622087	0.0922624183096216	Srrm2	17	24009506	24043715	+	12842	protein_coding	serine/arginine repetitive matrix 2 [Source:MGI Symbol;Acc:MGI:1923206]	-	9098	19415	7445	10808	9289	7823	6488	6045	5602	8495	7785	8459	23.2295694273484	44.7913334536769	24.3739767596141	30.6650754474458	25.6857146751918	22.1025872481003	17.1829749589396	15.8890989657591	16.6853220749198	22.0605853267772	19.8921930271423
ENSMUSG00000022883	296.241827737367	480.048855503562	188.681496781406	330.572627898736	255.026847506113	196.344093947673	82.1859273235572	115.680450618002	230.680622381651	179.968797128984	138.496001738623	224.259318750135	291.152624895809	161.878519656825	0.849014204744448	0.00279303164648912	0.0925867871528296	Robo1	16	72105194	72842983	+	16511	protein_coding	roundabout guidance receptor 1 [Source:MGI Symbol;Acc:MGI:1274781]	-	320	544	158	319	256	191	85	121	216	190	148	211	0.635483814879707	0.976146012902074	0.402325968807252	0.70396111869085	0.550581918280849	0.419722681472666	0.17509176873462	0.247370338506181	0.50038528418011	0.383766036836768	0.294133879742965
ENSMUSG00000105728	1.85151142335854	14.1190839853989	5.97093344244956	1.03627783040356	5.97719173842452	1.02797954946426	0	0.956036781966956	1.0679658443595	0	0	0	4.99716299491655	0.337333771054409	3.82551193380007	0.00281773921872483	1	Gm42819	3	97938003	97943123	+	5121	TEC	predicted gene 42819 [Source:MGI Symbol;Acc:MGI:5662956]	-	2	16	5	1	6	1	0	1	1	0	0	0	0.0128056937945211	0.0925666334644322	0.0410496619218491	0.00711502763573229	0.0416056040052682	0.00708512755075364	0	0.00659144836941965	0.00746911901167469	0	0
ENSMUSG00000021738	666.544112409076	938.919085029026	723.677133224886	803.115318562759	754.12235766456	644.543177514088	565.6325586386	576.490179526075	580.973419331566	638.415627710185	594.222710162334	663.212392891394	755.153530734066	603.157814710025	0.324925710159779	0.00284783416349228	0.0934013398242951	Atxn7	14	8362461	8508323	-	7978	protein_coding	ataxin 7 [Source:MGI Symbol;Acc:MGI:2179277]	-	720	1064	606	775	757	627	585	603	544	674	635	624	2.95914575731103	3.95127137667276	3.19354432522648	3.5394765360997	3.36943594196563	2.85151695205637	2.49391711507046	2.55128461784635	2.60812872920276	2.81742379508042	2.61177888700423
ENSMUSG00000022255	2489.35710870556	2413.48091875412	2889.93178614559	2543.02579581034	2252.40508676297	2379.77265700975	1884.47496886604	2053.56700766502	2173.31049327157	2097.11008865037	2202.83505468053	2246.84454899424	2494.66222553139	2109.69036035463	0.241561278971223	0.00284808013418614	0.0934013398242951	Mtdh	15	34082840	34145770	+	15347	protein_coding	metadherin [Source:MGI Symbol;Acc:MGI:1914404]	-	2689	2735	2420	2454	2261	2315	1949	2148	2035	2214	2354	2114	5.74506837986467	5.27986842490251	6.62958325742268	5.82616033794381	5.23157464030889	5.47305674749806	4.31925184633302	4.72439731871806	5.0718345255509	4.81105627698371	5.03314774336501
ENSMUSG00000042359	131.457311058457	263.850381977142	254.361764648351	155.441674560534	88.6616774532971	131.581382331425	71.5501014346263	85.0872735950591	80.0974383269622	85.2483775874135	101.064649917373	148.797652251274	170.892365338201	95.3075821854514	0.842776153078214	0.00288380707313573	0.0943730437316447	Osbpl6	2	76236852	76430991	+	10063	protein_coding	oxysterol binding protein-like 6 [Source:MGI Symbol;Acc:MGI:2139014]	-	142	299	213	150	89	128	74	89	75	90	108	140	0.462688563295611	0.880304613816927	0.889910819506729	0.543119196898316	0.314063806881266	0.461514070156852	0.250106183192618	0.29853700008765	0.285074220849544	0.298264351992484	0.352170518135139
ENSMUSG00000050050	50.91656414236	31.7679389671475	37.0197873431873	40.4148353857388	26.8973628229103	18.5036318903566	16.4371854647114	11.4724413836035	24.5632144202684	14.2080629312356	5.61470277318741	22.3196478376911	34.2533534252834	15.7692091351162	1.12806272587196	0.00291558227176837	0.0948587519390313	Ccdc158	5	92755813	92823130	-	6207	protein_coding	coiled-coil domain containing 158 [Source:MGI Symbol;Acc:MGI:2444555]	-	55	36	31	39	27	18	17	12	23	15	6	21	0.290541943426442	0.171834363208564	0.209978246488012	0.228936072882361	0.154467591670598	0.105218767097369	0.093150964832522	0.065258206089508	0.141732760520715	0.0805927225739854	0.0317194916491587
ENSMUSG00000020218	30.549938485416	62.6534351852076	60.9035211129855	25.906945760089	8.96578760763678	24.6715091871421	0	3.82414712786783	13.8835559766734	13.2608587358199	4.67891897765618	21.2568074644677	35.6085228897462	9.48404804708084	1.91532417997322	0.00296199700667043	0.0952533817035304	Wif1	10	120869865	120936555	+	2427	protein_coding	Wnt inhibitory factor 1 [Source:MGI Symbol;Acc:MGI:1344332]	-	33	71	51	25	9	24	0	4	13	14	5	20	0.445832841247942	0.866718037390976	0.88347599948836	0.375319906495519	0.131682508103201	0.358792961062145	0	0.0556321501438781	0.204879134719497	0.192373201654558	0.0676015947899767
ENSMUSG00000040552	1656.17696819422	448.280916536415	1107.01106023015	788.607428937109	1403.64385990669	811.075864527298	427.366822082498	448.381250742503	1061.55804929334	585.372192766906	352.790490915276	376.245492121079	1035.79934972198	541.952382986933	0.934718197951223	0.00296577192894045	0.0952533817035304	C3ar1	6	122824097	122833120	-	4305	protein_coding	complement component 3a receptor 1 [Source:MGI Symbol;Acc:MGI:1097680]	-	1789	508	927	761	1409	789	442	469	994	618	377	354	13.6258962511031	3.49606757876669	9.05317539774952	6.44084529934662	11.6223297730689	6.64976497790151	3.49196028027922	3.67735296859588	8.83155918885793	4.78742113716357	2.87359068986472
ENSMUSG00000028282	274.023690657064	320.326717918737	262.72107146778	246.634123636047	291.886196559731	245.687112321957	199.180012101798	212.240165596664	211.45723718318	238.695457244758	185.285191515185	241.264764721709	273.546485426886	214.687138060549	0.351774357116351	0.00297224519431521	0.0952533817035304	Casp8ap2	4	32615451	32653265	+	6826	protein_coding	caspase 8 associated protein 2 [Source:MGI Symbol;Acc:MGI:1349399]	-	296	363	220	238	293	239	206	222	198	252	198	227	1.42184848702284	1.57554061657269	1.35503574902999	1.27040454913203	1.52425171761199	1.27038122279385	1.02641057526917	1.09779771112733	1.10948915541161	1.23117721762101	0.951821739523708
ENSMUSG00000024222	2043.14285567615	1568.10076512836	2738.27007670737	4486.04672781701	1858.90663065003	4329.84986234344	635.248873547966	551.633223194934	2111.36847429872	1344.08275329489	526.846276884085	1744.12105245958	2837.38615305373	1152.21677561336	1.30023233338888	0.0029849404902137	0.0954625905950781	Fkbp5	17	28618068	28736501	-	9468	protein_coding	FK506 binding protein 5 [Source:MGI Symbol;Acc:MGI:104670]	-	2207	1777	2293	4329	1866	4212	657	577	1977	1419	563	1641	7.64314285663742	5.56055884399492	10.1821657326405	16.6594516990146	6.9985609117569	16.1410789655015	2.36008313723042	2.05708953280349	7.98679569846009	4.99816351341174	1.95122278670509
ENSMUSG00000008730	3861.32707341424	3535.94809559333	3860.80556388788	5611.44445163528	3667.00713152344	4764.68521176682	2343.74926861533	2805.01191829105	3401.47121428499	3136.1930910214	2301.09235321131	4035.6048971292	4216.86958797017	3003.85379042555	0.489430271842503	0.00299349280605181	0.0955387116389195	Hipk1	3	103647131	103698879	-	10914	protein_coding	homeodomain interacting protein kinase 1 [Source:MGI Symbol;Acc:MGI:1314873]	-	4171	4007	3233	5415	3681	4635	2424	2934	3185	3311	2459	3797	12.5309539349271	10.8773888812261	12.4542079047624	18.0778125407548	11.9767014743527	15.4087794116403	7.553858540279	9.07427194711447	11.1621959585151	10.1172281783299	7.39318021798456
ENSMUSG00000032202	247.176775018366	480.93129825265	235.254777632513	275.649902887347	222.152292944778	374.184556004989	223.35234366755	123.328744873737	153.787081587767	262.37556213015	163.762164217966	204.06535165889	305.891600456774	188.445208022677	0.699644155105574	0.003007128437572	0.0957062528059061	Rab27a	9	72952136	73004911	+	3879	protein_coding	RAB27A, member RAS oncogene family [Source:MGI Symbol;Acc:MGI:1861441]	-	267	545	197	266	223	364	231	129	144	277	175	192	2.25693668021466	4.16261251022154	2.13521102264772	2.49857979763022	2.04145795646422	3.40474078376309	2.02540735094358	1.12254965606444	1.41992978037257	2.3814765152124	1.48038604522675
ENSMUSG00000097488	66.6544112409076	60.8885496870327	69.2628279324149	80.8296707714777	74.7148967303065	62.7067525173196	52.2122361820246	53.5380597901496	38.4467703969418	50.2018223570324	48.6607573676242	41.4507745557121	69.1761848132432	47.4184034415808	0.539825316270949	0.00301744973889641	0.0957062528059061	4732487G21Rik	12	86337535	86352780	-	2664	lncRNA	RIKEN cDNA 4732487G21 gene [Source:MGI Symbol;Acc:MGI:2441820]	-	72	69	58	78	75	61	54	56	36	53	52	39	0.886188620564091	0.767368791479534	0.915351988341124	1.06682147476037	0.999729251646859	0.830803014051041	0.689413400694114	0.709560509605364	0.516883222416028	0.663480193640804	0.640509885050617
ENSMUSG00000032254	295.316072025688	329.151145409612	179.128003273487	151.29656323892	363.612497420825	113.077750441068	53.1791294446547	119.50459774587	160.194876653924	190.388043278557	81.4131902112175	115.849600681349	238.5970053016	120.088239669262	0.991722340542841	0.00303842858812428	0.0957062528059061	Kif23	9	61823187	61854056	-	7901	protein_coding	kinesin family member 23 [Source:MGI Symbol;Acc:MGI:1919069]	-	319	373	150	146	365	110	55	125	150	201	87	109	1.32384309435742	1.39867248828721	0.798184984312577	0.673289995228125	1.64046194174803	0.505141526466907	0.236755899322874	0.534027450635964	0.726161722417152	0.848399315127724	0.361321583047938
ENSMUSG00002075078	49.0650527190014	35.2977099634972	22.6895470813083	102.591505209952	68.737704991882	70.9305889130336	18.3709719899716	22.944882767207	26.6991461089874	25.574513276224	10.2936217508436	47.8278167950524	58.2186848131125	25.285158781381	1.20784279882862	0.00304012394181029	0.0957062528059061	7SK	15	11965416	11965675	+	260	misc_RNA	7SK RNA [Source:RFAM;Acc:RF00100]	-	53	40	19	99	69	69	19	24	25	27	11	45	6.68390724971609	4.55801663433997	3.0723777348723	13.8737292143689	9.42390933952406	9.62893359588941	2.4854236958357	3.11582834767366	3.67782292872943	3.46319327780811	1.38827675085231
ENSMUSG00000049354	1609.88918261025	1854.01221583269	1745.90093857225	1531.61863333646	1747.3323848661	1369.26875988639	1294.67007866168	1296.38587634719	1311.46205687346	1450.16962318144	1277.34488090014	1503.91912811109	1643.00368585069	1355.65860734584	0.277559186413385	0.00304193268107018	0.0957062528059061	Dcaf7	11	105927698	105950150	+	6133	protein_coding	DDB1 and CUL4 associated factor 7 [Source:MGI Symbol;Acc:MGI:1919083]	-	1739	2101	1462	1478	1754	1332	1339	1356	1228	1531	1365	1415	9.29725002657024	10.1494463014616	10.0223315161264	8.78077474977673	10.1557495213505	7.88013593113147	7.42553575968009	7.46315317582359	7.65860299810686	8.32508237865764	7.30325391514588
ENSMUSG00000079419	323.088743376066	102.363358894142	136.13728248785	236.271345332012	268.973628229103	194.288134848744	80.252140798297	86.0433103770261	198.641647050866	125.978157990289	57.0828115274053	104.158356575892	210.187082194653	108.692737386629	0.953143382844649	0.00304706060362887	0.0957062528059061	Ms4a6c	19	11446730	11459556	+	2050	protein_coding	membrane-spanning 4-domains, subfamily A, member 6C [Source:MGI Symbol;Acc:MGI:2385644]	-	349	116	114	228	270	189	83	90	186	133	61	98	5.58212373528981	1.67646075233773	2.33800452019551	4.0524004327558	4.67697727560685	3.34510991093677	1.37703320554902	1.48191836047894	3.4704295967484	2.16363547509674	0.976411054036262
ENSMUSG00000027199	200.888989434402	172.076336072049	268.69200491023	147.151451917306	199.239724614151	209.707828090708	130.530590455061	95.6036781966956	128.155901323139	207.437718796039	103.872001303967	98.844154709775	199.626055839808	127.407340797446	0.645853666669486	0.00306193181646587	0.0957062528059061	Gatm	2	122424948	122441784	-	3001	protein_coding	glycine amidinotransferase (L-arginine:glycine amidinotransferase) [Source:MGI Symbol;Acc:MGI:1914342]	-	217	195	225	142	200	204	135	100	120	219	111	93	2.37094582955984	1.92512032123489	3.15217905417545	1.72406532029559	2.36657001122935	2.46641765752466	1.52998775362306	1.12478530822386	1.52946451684583	2.4336853794216	1.21370655325794
ENSMUSG00000094410	49.0650527190014	152.662595592126	42.9907207856368	109.845450022777	71.7263008610943	67.8466502646409	33.841264192053	11.4724413836035	19.2233851984709	53.9906391386952	38.3671356167806	57.3933801540629	82.3561283742127	35.7147076139444	1.20748284209883	0.00306675504824145	0.0957062528059061	Zbed6	1	133547678	133589056	-	10156	protein_coding	zinc finger, BED type containing 6 [Source:NCBI gene (formerly Entrezgene);Acc:667118]	zf-BED	53	173	36	106	72	66	35	12	18	57	41	54	0.171112237586272	0.504676024548572	0.14903015898512	0.380289680129383	0.251747496783354	0.235789082352208	0.117210234199669	0.0398835845999977	0.0677913009312869	0.187170963988141	0.132470104229346
ENSMUSG00000116657	2.77726713503782	25.5908397235355	5.97093344244956	4.14511132161424	0	8.22383639571404	1.93378652526017	0	0	0.947204195415705	0.935783795531235	0	7.78466466972519	0.636129086034518	3.5925160430724	0.00306684577860239	1	Gm49774	17	27764681	27775492	-	10812	lncRNA	predicted gene, 49774 [Source:MGI Symbol;Acc:MGI:6215288]	-	3	29	5	4	0	8	2	0	0	1	1	0	0.00909794088814411	0.0794659762831192	0.0194427782743053	0.0134798581289623	0	0.0268464211523562	0.00629135425470027	0	0	0.0030844680541172	0.0030349439614368
ENSMUSG00000092341	3548.42164286665	5585.86260172344	4293.10114512123	3853.91725127084	3297.41744236419	3480.73875448597	3064.08474927474	2693.15561480092	3333.12140024599	2681.53507722186	2704.41516908527	3533.94424096776	4009.90980630539	3001.70937526609	0.417940715805786	0.00307615407464853	0.0957111182976118	Malat1	19	5845717	5852704	-	6988	lncRNA	metastasis associated lung adenocarcinoma transcript 1 (non-coding RNA) [Source:MGI Symbol;Acc:MGI:1919539]	-	3833	6330	3595	3719	3310	3386	3169	2817	3121	2831	2890	3325	17.9851397190927	26.8373775643844	21.6291949265292	19.3911983697043	16.8201728378969	17.5807138956165	15.4237339194022	13.6072254722569	17.0830348812066	13.5105580151341	13.5706815656766
ENSMUSG00000066232	2072.76703844989	2170.80916275508	2704.83284942965	2265.30333726218	2212.55714184014	2023.06375334565	1714.30175464314	1913.98563749785	1836.90125229833	1996.70644393631	1869.69602347141	1925.86675628078	2241.55554718043	1876.2429780213	0.256174969154239	0.00309644805045515	0.0957111182976118	Ipo7	7	109617481	109655816	+	11169	protein_coding	importin 7 [Source:MGI Symbol;Acc:MGI:2152414]	-	2239	2460	2265	2186	2221	1968	1773	2002	1720	2108	1998	1812	6.57306149999024	6.52544417433039	8.52605778242551	7.13127581326626	7.06138066828549	6.39312582619945	5.39901614575278	6.05041846304912	5.8903121630506	6.29423029914502	5.86999736716692
ENSMUSG00000048756	1418.25775029264	1848.71755933817	1572.74386874121	1712.96725365708	1531.15728365975	1609.81597446102	1179.6097804087	1042.08009234398	1533.59895250024	1367.76285818028	1247.39979944314	1374.25260257784	1615.60994835831	1290.78401424236	0.324214975313918	0.00309729746172081	0.0957111182976118	Foxo3	10	42057837	42152751	-	7571	protein_coding	forkhead box O3 [Source:MGI Symbol;Acc:MGI:1890081]	Fork_head	1532	2095	1317	1653	1537	1566	1220	1090	1436	1444	1333	1293	6.63488518928212	8.19822896818447	7.31352726800307	7.95519765312813	7.20901581025347	7.50483175293661	5.48058308586841	4.8596935330577	7.25479840798004	6.36063186633341	5.77741569277981
ENSMUSG00000023025	1048.88122133262	1057.16641340674	1324.35303753531	1363.74162481109	996.198623070754	1070.12671099229	907.91277360965	843.224441694856	872.528094841708	906.47441501283	890.866173345736	1066.02889434306	1143.41127185813	914.505798807973	0.321845025209787	0.00311019397271779	0.0957111182976118	Larp4	15	99867946	99914239	+	10843	protein_coding	La ribonucleoprotein domain family, member 4 [Source:MGI Symbol;Acc:MGI:2443114]	-	1133	1198	1109	1316	1000	1041	939	882	817	957	952	1003	3.42616555959303	3.27338149327726	4.30007910062315	4.42219407762814	3.27495923807954	3.48340299299946	2.9453459719408	2.74571058397324	2.8820184322446	2.9433966661687	2.88100627443734
ENSMUSG00000086237	1.85151142335854	9.70687023996174	1.19418668848991	2.07255566080712	2.98859586921226	4.11191819785702	0	0	0	0	0.935783795531235	0	3.6542730132811	0.155963965921873	3.86102224716408	0.00313459249910281	1	Gm15591	16	45556866	45557681	+	627	lncRNA	predicted gene 15591 [Source:MGI Symbol;Acc:MGI:3783038]	-	2	11	1	2	3	4	0	0	0	0	1	0	0.104590044532285	0.51977382672298	0.067054328134542	0.11622346578177	0.169906138844481	0.231470100079167	0	0	0	0	0.0523346317560681
ENSMUSG00000047586	1.85151142335854	32.6503817162349	7.16512013093947	13.4716117952463	2.98859586921226	1.02797954946426	0.966893262630085	0.956036781966956	0	0.947204195415705	3.74313518212494	0	9.85920008074262	1.10221157035628	3.13862836094734	0.00316816052493547	1	Nccrp1	7	28243021	28246679	-	1531	protein_coding	non-specific cytotoxic cell receptor protein 1 homolog (zebrafish) [Source:MGI Symbol;Acc:MGI:2685009]	-	2	37	6	13	3	1	1	1	0	1	4	0	0.0428334147104786	0.716004572540015	0.164767068871422	0.309385195815549	0.0695827230930695	0.0236988492406332	0.0222149321364531	0.0220475552578694	0	0.0217826705428577	0.0857317155089607
ENSMUSG00000033382	1704.31626520154	1591.04427660464	1593.04504244554	1848.71964943995	1647.71252255903	1503.93408086621	1398.1276577631	1391.98955454389	1387.28763182298	1434.06715185938	1274.53752951354	1555.99830639904	1648.12863951948	1407.00130531699	0.228477915282574	0.00318747872971341	0.0969331694641137	Trappc8	18	20950280	21029150	-	12045	protein_coding	trafficking protein particle complex 8 [Source:MGI Symbol;Acc:MGI:2443008]	-	1841	1803	1334	1784	1654	1463	1446	1456	1299	1514	1362	1464	5.01158242149973	4.43484233674947	4.65632602985781	5.39658985772451	4.87622860212479	4.40696874787712	4.08302153191493	4.08028220318023	4.12502421236722	4.19184663031036	3.71045370022885
ENSMUSG00000028832	688.762249489378	1277.7771006786	505.140969231232	438.345522260706	724.236398972438	532.493406622484	423.499249031977	386.23885991465	542.526648934624	469.81328092619	310.68022011637	425.136149289355	694.459274542473	426.315734702194	0.704924920173004	0.00322182632278563	0.0976644834629324	Stmn1	4	134195631	134201154	+	1922	protein_coding	stathmin 1 [Source:MGI Symbol;Acc:MGI:96739]	-	744	1448	423	423	727	518	438	404	508	496	332	400	12.6925079848534	22.3205268274755	9.25297396574993	8.01896561345134	13.4318670418558	9.77864827319358	7.75069966815735	7.09518317810531	10.1096119131443	8.60626286480391	5.6681510327108
ENSMUSG00000027506	1506.20454290218	2417.89313249956	1288.52743688061	1063.22105399405	1397.66666816827	1044.42722225568	721.302373922043	819.323522145682	1299.71443258551	1150.85309743008	705.580981830551	851.335138951933	1452.99000945006	924.684924477633	0.652409174260412	0.00322414568444722	0.0976644834629324	Tpd52	3	8990653	9069783	-	7487	protein_coding	tumor protein D52 [Source:MGI Symbol;Acc:MGI:107749]	-	1627	2740	1079	1026	1403	1016	746	857	1217	1215	754	801	7.1253731493706	10.8425639451843	6.05909787309284	4.99310725152561	6.65434317816889	4.92366304239454	3.38884086834227	3.86374645178668	6.21737267855519	5.41196224794376	3.30461010280957
ENSMUSG00000033439	104.610395419758	146.485496348513	138.52565586483	181.348620320623	141.460204476047	122.329566386246	78.3183542730369	107.076119580299	105.72861859159	86.1955817828292	78.6058388246237	121.163802547466	139.126656469336	96.1813859333075	0.53395817447808	0.00324442557821808	0.0980316164007773	Trmt13	3	116374742	116408236	-	6134	protein_coding	tRNA methyltransferase 13 [Source:MGI Symbol;Acc:MGI:1925219]	-	113	166	116	175	142	119	81	112	99	91	84	114	0.604035641111585	0.801776972359445	0.795075871190334	1.03950275374183	0.82205320975326	0.703891366857143	0.449119000517392	0.616325137785683	0.617327435184191	0.49474787132401	0.449357741331691
ENSMUSG00000029267	355.49019328484	408.57099282748	421.547901036939	321.246127425104	308.821573151934	302.225987542491	273.630793324314	242.833342619607	294.758573043221	282.26685023388	274.184652090652	291.218262263208	352.983795878131	276.482078929147	0.352591182605392	0.00330063955492586	0.0989864465175746	Mtf2	5	108213540	108256870	+	5698	protein_coding	metal response element binding transcription factor 2 [Source:MGI Symbol;Acc:MGI:105050]	-	384	463	353	310	310	294	283	254	276	298	293	274	2.20971707984812	2.40739751861112	2.60463346794425	1.98230563741688	1.93194432006562	1.8720926337484	1.68921205538038	1.50468954077724	1.85272427775096	1.74413514270486	1.68733722964883
ENSMUSG00000064115	9.25755711679272	111.187786385016	38.2139740316772	17.6167231168605	8.96578760763678	15.4196932419638	14.5033989394513	9.56036781966956	1.0679658443595	13.2608587358199	6.55048656871864	4.25136149289355	33.4435869166579	8.1990732334854	2.02507707577596	0.00331245409724602	0.0989864465175746	Cadm2	16	66452307	67417796	-	9809	protein_coding	cell adhesion molecule 2 [Source:MGI Symbol;Acc:MGI:2442722]	-	10	126	32	17	9	15	15	10	1	14	7	4	0.0334274431245503	0.380570458102196	0.137157512457075	0.0631474116509273	0.0325816543140451	0.0554841546346356	0.0520099823135533	0.0344120777855011	0.0038994146659992	0.0475980997467236	0.0234169333038417
ENSMUSG00000071708	301.796362007443	235.612214006344	708.152706274517	231.089956179994	269.969826852174	255.9669078166	204.014478414948	225.624680544202	226.408759004213	152.499875461929	137.560217943092	195.562628673103	333.764662189512	190.278440006914	0.809479768647216	0.00331255115292355	0.0989864465175746	Sms	X	156226851	156275283	-	6010	protein_coding	spermine synthase [Source:MGI Symbol;Acc:MGI:109490]	-	326	267	593	223	271	249	211	236	212	161	147	184	1.77857023980767	1.31621262377654	4.14834222928988	1.35195351157013	1.60121693810525	1.50323654054325	1.19406553948285	1.32547994601536	1.34922861784736	0.893383069014898	0.80260077775791
ENSMUSG00000032244	826.69985052959	795.963359676862	825.183001746529	864.255710556569	867.689000694626	633.235402469981	609.142755456954	642.456717481795	670.682550257763	753.974539550901	591.415358775741	628.138660575022	802.171054279026	649.301763683029	0.305004513676979	0.00334613543354938	0.0996054430305977	Fem1b	9	62699103	62719216	-	6785	protein_coding	fem 1 homolog b [Source:MGI Symbol;Acc:MGI:1335087]	-	893	902	691	834	871	616	630	672	628	796	632	591	4.31548389271306	3.93863692367506	4.28176227628405	4.47865455266557	4.55851784953727	3.29407368068448	3.15799093494076	3.34314375402568	3.5402501270623	3.91245656691049	3.05649676023383
ENSMUSG00000034311	142.566379598608	23.8259542253606	88.3698149482534	48.7050580289673	120.540033391561	47.2870592753558	21.2716517778619	31.5492138049096	29.9030436420659	57.779455920358	24.3303786838121	39.3250938092653	78.549049911351	34.0264729397121	1.20665132628062	0.00335291141365156	0.0996155772973367	Kif4	X	99669343	99770820	+	5514	protein_coding	kinesin family member 4 [Source:MGI Symbol;Acc:MGI:108389]	-	154	27	74	47	121	46	22	33	28	61	26	37	0.915760384471199	0.145072890701245	0.564234079939514	0.310572117620874	0.779244893949596	0.302686825647594	0.135698829202033	0.202014623557007	0.194229604070731	0.368934600048608	0.154726000523653
ENSMUSG00000035181	1112.75836543848	997.160306468797	1080.73895308337	1111.92611202302	1239.27108710002	926.209574067294	763.845677477767	747.62076349816	837.285221977845	984.145159036918	820.682388680893	1010.76119493544	1078.01073303016	860.723400934504	0.324923658758052	0.00336468106755508	0.0997737514265998	Heatr5a	12	51922654	52018104	-	20676	protein_coding	HEAT repeat containing 5A [Source:MGI Symbol;Acc:MGI:2444133]	-	1202	1130	905	1073	1244	901	790	782	784	1039	877	951	1.90618846541727	1.6192025623538	1.84024824361694	1.89088260053849	2.13653107346728	1.58110501580847	1.29951336185522	1.27666178912952	1.45035292279398	1.6758507485277	1.3918415058713
ENSMUSG00000038408	6.4802899817549	54.7114504434207	3.58256006546973	0	0	0	0	0	1.0679658443595	0	0	0	10.7957167484409	0.177994307393249	5.41517113649266	0.00341154713485745	1	1700018A04Rik	13	31749475	31809775	-	5546	lncRNA	RIKEN cDNA 1700018A04 gene [Source:MGI Symbol;Acc:MGI:1916631]	-	7	62	3	0	0	0	0	0	1	0	0	0	0.0413852962001622	0.331208204767221	0.0227423712984265	0	0	0	0	0	0.00689674692729645	0	0
ENSMUSG00000071796	209.220790839515	288.55877895159	186.293123404426	202.074176928694	222.152292944778	170.644605211066	143.100202869253	192.163393175358	144.175388988532	156.288692243591	157.211677649247	141.35776963871	213.157294713345	155.716187427449	0.454570019724716	0.00344810823808956	0.101277547281572	6820431F20Rik	8	20143722	20180155	+	8522	transcribed_unprocessed_pseudogene	RIKEN cDNA 6820431F20 gene [Source:MGI Symbol;Acc:MGI:3694236]	-	226	327	156	195	223	166	148	201	135	165	168	133	0.869550486406586	1.1368298939556	0.769621913106761	0.833728118036151	0.929220301939065	0.706755191165215	0.590663816349991	0.796141308033255	0.6059215432922	0.645696939589767	0.646881104278008
ENSMUSG00000029377	4.62877855839636	30.8854962180601	0	3.10883349121068	0	3.08393864839277	0	0	0	0	0	1.06284037322339	6.95117448600998	0.177140062203898	4.78359262945867	0.00345435062215489	1	Ereg	5	91222481	91241505	+	4128	protein_coding	epiregulin [Source:MGI Symbol;Acc:MGI:107508]	-	5	35	0	3	0	3	0	0	0	0	0	1	0.0397153330436911	0.251198833408998	0	0.0264796922402508	0	0.0263684143803847	0	0	0	0	0
ENSMUSG00000026546	24.0696485036611	89.1267176578305	20.3011737043285	34.1971684033175	30.8821573151934	38.0352433301775	15.4702922020814	20.0767724213061	21.3593168871899	19.8912881037298	9.35783795531235	19.131126718021	39.4353514857514	17.5477723812734	1.17652257165899	0.00346661725999783	0.101502770594981	Cfap45	1	172348368	172373437	+	5717	protein_coding	cilia and flagella associated protein 45 [Source:MGI Symbol;Acc:MGI:1919120]	-	26	101	17	33	31	37	16	21	20	21	10	18	0.149119022736165	0.523410516082594	0.125018730730468	0.210318325213452	0.19255236550173	0.234820485033085	0.0951857578475694	0.123990020831863	0.133809195238013	0.122500374431243	0.057396911161544
ENSMUSG00000014602	85.169525474493	387.392366849382	96.7291217676828	122.28078398762	58.7757187611745	45.2311001764272	57.046702495175	20.0767724213061	57.6701555954128	52.0962307478638	67.3764332782489	58.4562205272863	132.596436169463	52.1204191775488	1.34904501466131	0.00346889111988793	0.101502770594981	Kif1a	1	92943186	93029673	-	9330	protein_coding	kinesin family member 1A [Source:MGI Symbol;Acc:MGI:108391]	-	92	439	81	118	59	44	59	21	54	55	72	55	0.323321121586299	1.39403006067407	0.365004090350373	0.460820436191322	0.224556548562839	0.171109247614792	0.215075305997178	0.0759754500638541	0.221378923555675	0.1965926873592	0.253225575133541
ENSMUSG00000042599	732.272767938304	710.366413015382	930.271430333641	812.441819036391	758.107152156844	653.794993459266	616.877901557994	630.028239316224	514.759536981277	634.626810928523	491.286492653898	702.537486700659	766.209095989971	598.352744689763	0.356105038484832	0.0035067416909211	0.101859876838015	Kdm7a	6	39113557	39183723	-	10057	protein_coding	lysine (K)-specific demethylase 7A [Source:MGI Symbol;Acc:MGI:2443388]	-	791	805	779	784	761	636	638	659	482	670	525	661	2.57890845759662	2.37146485424917	3.25659209045826	2.84039657091644	2.68702411027899	2.2945161267965	2.15760733642044	2.21183433218324	1.83317000866411	2.22173709483416	1.71296136107226
ENSMUSG00000001036	2116.27755689882	1633.40152856083	1985.93246295872	2373.07623162415	2039.21858142583	2383.88457520761	1447.43921415724	1424.49480513077	1823.01769632166	1742.8557195649	1564.63050612823	1873.78757799283	2088.63182277933	1646.03758654927	0.343610219365163	0.00350741742713753	0.101859876838015	Epn2	11	61408075	61470513	-	5228	protein_coding	epsin 2 [Source:MGI Symbol;Acc:MGI:1333766]	-	2286	1851	1663	2290	2047	2319	1497	1490	1707	1840	1672	1763	14.3373385433343	10.4896283733859	13.3736830528338	15.9599405961591	13.9039315300043	16.0941342112858	9.73882143612505	9.62024915430356	12.488839879332	11.7373095306144	10.4943950255707
ENSMUSG00000031504	62.0256326825112	301.795420187901	47.7674675395965	61.14039199381	88.6616774532971	53.4549365721413	35.7750507173131	21.032809203273	44.8545654630988	58.7266601157737	56.1470277318741	27.6338497038081	102.474254404876	40.6949938225235	1.3342862159688	0.0035147187509428	0.1018807706851	Rab20	8	11503518	11528710	-	1392	protein_coding	RAB20, member RAS oncogene family [Source:MGI Symbol;Acc:MGI:102789]	-	67	342	40	59	89	52	37	22	42	62	60	26	1.57820516550171	7.27907397854724	1.20813401552752	1.544344349736	2.27041960391249	1.35539711619633	0.90402964133165	0.53348114669221	1.15407547073924	1.4853840899922	1.4143885392696
ENSMUSG00000034327	609.147258284961	630.064122848426	610.229397818345	488.086858120077	532.966263342853	490.34624509445	498.916923517124	439.7769197048	449.613620475348	466.971668339943	467.891897765618	409.193543691004	560.140024251519	455.394095582306	0.298617714017703	0.00354074938803404	0.101903753214671	Kctd9	14	67953386	67979759	+	4746	protein_coding	potassium channel tetramerisation domain containing 9 [Source:MGI Symbol;Acc:MGI:2145579]	-	658	714	511	471	535	477	516	460	421	493	500	385	4.54596463469308	4.457175558359	4.52676055021552	3.61596768270913	4.00296142328184	3.64664170151586	3.69778919681192	3.27164164894797	3.39295826193615	3.46422027398857	3.45699685114356
ENSMUSG00000044583	331.420544781179	193.254962050147	304.517605564927	402.075798196581	390.509860243735	142.889157375532	141.166416343992	160.614179370449	261.651631868076	179.968797128984	171.248434582216	132.855046652923	294.111321368684	174.58408432444	0.752533953633192	0.00354484076918032	0.101903753214671	Tlr7	X	166087925	166113554	-	4082	protein_coding	toll-like receptor 7 [Source:MGI Symbol;Acc:MGI:2176882]	-	358	219	255	388	392	139	146	168	245	190	183	125	2.87566253502988	1.589499431402	2.62640403081608	3.46329983605169	3.41011027517163	1.23550426458841	1.21646617362391	1.38922283017297	2.29571112748716	1.55226874919448	1.47107495892283
ENSMUSG00000035623	680.430448084265	814.494657407698	643.666625096062	612.440197768504	594.73057797324	566.416731754805	491.181777416083	482.798574893313	570.293760887971	516.226286501559	515.61687133771	567.556759301289	652.029873014096	523.945671722988	0.316908220952234	0.00354740388294796	0.101903753214671	Rsf1	7	97229096	97341985	+	19039	protein_coding	remodeling and spacing factor 1 [Source:MGI Symbol;Acc:MGI:2682305]	-	735	923	539	591	597	551	508	505	534	545	551	534	1.26581750807503	1.4363055201283	1.19025218530663	1.13103153552433	1.1134880330922	1.05004984196978	0.907485636811917	0.895329459813961	1.07280620920173	0.95463792150889	0.949651324922062
ENSMUSG00000028364	792.446889197457	954.8030545126	449.014194872207	407.257187348599	780.0235218644	618.843688777482	438.002647971429	483.75461167528	337.477206817601	405.403395637922	349.047355733151	572.870961167406	667.064756095457	431.092696500465	0.630733012546214	0.00354842838572956	0.101903753214671	Tnc	4	63878022	63965252	-	7772	protein_coding	tenascin C [Source:MGI Symbol;Acc:MGI:101922]	-	856	1082	376	393	783	602	453	506	316	428	373	539	3.61134405436257	4.12461798627291	2.03399279032097	1.84243054726916	3.57753858768434	2.81038713186058	1.98237399365827	2.19762382816492	1.55517206291513	1.83652688642271	1.57482664223152
ENSMUSG00000020297	3.70302284671709	77.6549619196939	10.7476801964092	30.0520570817032	2.98859586921226	7.19585684624979	10.6358258889309	4.78018390983478	0	0.947204195415705	1.87156759106247	0	22.0570291266642	3.03913026420732	2.85341896720384	0.00354925954010775	1	Nsg2	11	31950463	32009202	+	4157	protein_coding	neuron specific gene family member 2 [Source:MGI Symbol;Acc:MGI:1202070]	-	4	88	9	29	3	7	11	5	0	1	2	0	0.0315506172344204	0.627179580188228	0.0910241938088093	0.254184661812597	0.0256269302515009	0.0610970813836579	0.0899979966586495	0.0405999604279505	0	0.00802243651698705	0.0157872572100335
ENSMUSG00000055408	1.85151142335854	29.1206107198852	4.77674675395965	3.10883349121068	0	10.2797954946426	0.966893262630085	0	0	1.89440839083141	0.935783795531235	0	8.18958298050944	0.632847574832122	3.67095268327942	0.00359326044504585	1	Hottip	6	52239760	52244588	+	2879	lncRNA	Hoxa distal transcript antisense RNA [Source:MGI Symbol;Acc:MGI:3642509]	-	2	33	4	3	0	10	1	0	0	2	1	0	0.0227780333177293	0.33959519557691	0.0584134265235954	0.0379674086723706	0	0.12602618335328	0.0118134981246647	0	0	0.0231672584933068	0.0113976429701475
ENSMUSG00000020914	897.057284617214	255.025954486267	626.948011457203	454.925967547163	860.715610333131	394.744146994274	208.848944728098	257.173894349111	405.827020856608	465.077259949111	176.863137355403	354.988684656611	581.569495905876	311.463156982491	0.901098802552474	0.0035933744883003	0.102685963688639	Top2a	11	98883769	98915015	-	9013	protein_coding	topoisomerase (DNA) II alpha [Source:MGI Symbol;Acc:MGI:98790]	-	969	289	525	439	864	384	216	269	380	491	189	334	3.5251881297109	0.94998715717382	2.44897464370219	1.77470640335236	3.40407976566969	1.54583915055644	0.815088116919614	1.00743848994182	1.61264353870395	1.81676366172723	0.688096179628241
ENSMUSG00000069769	1018.3312828472	2334.06107133625	1723.21139149094	1258.04128610992	877.650986925334	1205.82001152157	970.760835680605	860.433103770261	855.440641331956	1030.55816461229	810.38876693005	998.00711045676	1402.8526717052	920.93143713032	0.607264043425206	0.00359862797083593	0.102685963688639	Msi2	11	88230208	88609339	-	10405	protein_coding	musashi RNA-binding protein 2 [Source:MGI Symbol;Acc:MGI:1923876]	-	1100	2645	1443	1214	881	1173	1004	900	801	1088	866	939	3.46639854463801	7.53135040710139	5.83067188633699	4.25116507625355	3.00669365106154	4.09033027331391	3.28179772660387	2.91968538104932	2.94452053104158	3.48717003729104	2.73106804614833
ENSMUSG00000025154	559.15644985428	205.609160537371	394.081607201671	320.2098495947	466.220955597113	237.463275926243	199.180012101798	194.075466739292	363.108387082228	196.071268451051	129.13816378331	156.237534863838	363.790216451896	206.301805503586	0.8189541146055	0.00360014642261258	0.102685963688639	Arhgap19	19	41755027	41790486	-	5103	protein_coding	Rho GTPase activating protein 19 [Source:MGI Symbol;Acc:MGI:1918335]	-	604	233	330	309	468	231	206	203	340	207	138	147	3.88096086466124	1.3527564555571	2.71883422189263	2.20629854310774	3.25668415689915	1.6424375311173	1.3729724841833	1.34278382152832	2.54845813756364	1.3527922007507	0.887381216407123
ENSMUSG00000048118	846.140720474855	798.610687924125	671.13291893133	730.57587043451	881.635781417617	638.375300217303	652.652952275307	549.721149631	641.847472460057	609.052297652299	616.681521255084	636.641383560809	761.078546566623	617.766129472426	0.302083130353674	0.0036032617604268	0.102685963688639	Arid4a	12	71062764	71145366	+	5615	protein_coding	AT rich interactive domain 4A (RBP1-like) [Source:MGI Symbol;Acc:MGI:2444354]	ARID	914	905	562	705	885	621	675	575	601	643	659	599	5.33733335177853	4.77516168326	4.20805019093163	4.57478536926491	5.59691700291529	4.01277018956033	4.08859594712627	3.45663652402206	4.09400969434202	3.81898124853376	3.8511671414399
ENSMUSG00000042349	618.404815401754	551.526718179644	468.121181888045	472.542690664023	599.711571088594	427.63949257713	488.281097628193	377.634528876948	425.050406055079	375.092861384619	403.322815873962	320.977792713463	522.991078299865	398.393250422044	0.393225366814137	0.00363412146978476	0.102838329489577	Ikbke	1	131182080	131207344	-	9018	protein_coding	inhibitor of kappaB kinase epsilon [Source:MGI Symbol;Acc:MGI:1929612]	-	668	625	392	456	602	416	505	395	398	396	431	302	2.42881325636084	2.05333140130918	1.82755389068754	1.84240871305154	2.37050904603403	1.67373057063233	1.90458924994005	1.47850397032826	1.68809543874439	1.46443894056793	1.56828053691113
ENSMUSG00000048922	76.8377240693796	229.435114762732	52.5442142935561	35.233446233721	71.7263008610943	47.2870592753558	40.6095170304636	14.3405517295043	39.5147362413013	63.4626810928523	12.1651893419061	12.7540844786806	85.5106432493064	30.4744599857847	1.49031373290449	0.00370624685019365	0.104307263625723	Cdca2	14	67913780	67953290	-	5715	protein_coding	cell division cycle associated 2 [Source:MGI Symbol;Acc:MGI:1919787]	-	83	260	44	34	72	46	42	15	37	67	13	12	0.476200394357362	1.34786493648899	0.323691129409579	0.216767440379334	0.447374904170034	0.292041147265237	0.249950055334769	0.0885952942251916	0.247633641815413	0.390971302935208	0.0746420968405444
ENSMUSG00000032393	1884.838628979	2585.55725482617	2492.26761887844	2159.60299856102	2114.92967677921	2021.00779424673	1597.3076698649	1761.9757891651	1540.00674756639	1771.27184542737	1875.31072624459	2086.35565263751	2209.70066204509	1772.03807181764	0.318378282135036	0.00372865307092444	0.104563434193979	Dpp8	9	64939696	64989933	+	13707	protein_coding	dipeptidylpeptidase 8 [Source:MGI Symbol;Acc:MGI:1921638]	-	2036	2930	2087	2084	2123	1966	1652	1843	1442	1870	2004	1963	4.87038456003021	6.33307264908476	6.40139155366796	5.53970539090007	5.50000314790019	5.2040750329355	4.09909337847105	4.53856492922797	4.02389836562118	4.54972877245826	4.79746724144989
ENSMUSG00000005413	2249.58637938063	1000.69007746515	1640.81250998514	1616.59341542955	1652.69351567438	1424.77965555746	833.461992387133	945.52037736532	1550.68640600999	1160.32513938424	710.259900808207	1115.98239188456	1597.52592558205	1052.70603463991	0.601927366514024	0.00374236982643997	0.104563434193979	Hmox1	8	75820249	75827217	+	1751	protein_coding	heme oxygenase 1 [Source:MGI Symbol;Acc:MGI:96163]	-	2430	1134	1374	1560	1659	1386	862	989	1452	1225	759	1050	45.5038371644303	19.1874018342204	32.9909592114515	32.4615923330855	33.6446176057599	28.7196758011133	16.7433093483633	19.0653936160481	31.7179146100271	23.3311559316768	14.2236921246662
ENSMUSG00000020387	913.720887427441	1063.34351265035	913.552816694782	814.514374697198	818.875268164159	1055.73499729979	714.534121083633	616.643724368687	703.789491432908	700.931104607622	703.709414239489	936.362368809804	929.956976155621	729.328370757024	0.351253164827127	0.00376411934125144	0.104981627537353	Jade2	11	51704282	51748480	-	10760	protein_coding	jade family PHD finger 2 [Source:MGI Symbol;Acc:MGI:1924151]	-	987	1205	765	786	822	1027	739	645	659	740	752	881	3.00768793999815	3.31790569595426	2.98912116741392	2.66159297646393	2.71278204843904	3.46306482513656	2.33588979122418	2.02340618767377	2.3425954669461	2.29353705992799	2.29330745460159
ENSMUSG00000031016	439.733963047654	647.712977830174	595.899157556466	488.086858120077	463.2323597279	495.486142841771	249.458461758562	333.656836906468	337.477206817601	463.18285155828	355.597842301869	482.529529443418	521.691909854007	370.317121464366	0.494623050901094	0.00381017825638378	0.105571790092238	Wee1	7	109721253	109742493	+	3419	protein_coding	WEE 1 homolog 1 (S. pombe) [Source:MGI Symbol;Acc:MGI:103075]	-	475	734	499	471	465	482	258	349	316	489	380	454	4.55535683135826	6.36042625400293	6.13614764739355	5.0194158005667	4.82957826955275	5.11505592463625	2.56649715239388	3.44557697508906	3.53518492921217	4.76975500027649	3.64704573331406
ENSMUSG00000021624	546.19586989077	198.549618544672	346.314139662074	183.42117598143	472.198147335537	249.799030519814	138.265736556102	133.845149475374	301.166368109378	231.117823681432	116.972974441404	153.049013744168	332.746330322383	179.06951100131	0.894598432408762	0.00382256815398259	0.105603229789845	Cd180	13	102830066	102876137	+	4509	protein_coding	CD180 antigen [Source:MGI Symbol;Acc:MGI:1194924]	-	590	225	290	177	474	243	143	140	282	244	125	144	4.29041862650568	1.47839860894261	2.70403381785402	1.4302909746058	3.73296108910342	1.95536792626757	1.07863866432248	1.0480534473213	2.39217544585888	1.80466212878068	0.909675485447291
ENSMUSG00000045903	107.387662554796	76.7725191706065	62.0977078014754	64.2492254850207	80.692088468731	125.413505034639	22.238545040492	25.8129931131078	46.9904971518178	85.2483775874135	8.42205415978112	37.1994130628186	86.1021180858781	37.6519800192385	1.19463886725153	0.00383860754178878	0.105603229789845	Npas4	19	5034383	5040344	-	4136	protein_coding	neuronal PAS domain protein 4 [Source:MGI Symbol;Acc:MGI:2664186]	bHLH	116	87	52	62	81	122	23	27	44	90	9	35	0.919613529850358	0.623200775318969	0.528587841996762	0.546188468181884	0.695440286387382	1.070241406882	0.189133076721693	0.220352947701776	0.40690806871049	0.725685245188676	0.0714033672629333
ENSMUSG00000024781	5601.74781137127	1824.00916236372	4088.89522138946	3512.98184506807	4576.53647438704	3015.06401857866	1882.54118234078	2219.91740772727	3542.44270574045	2523.35197658744	1637.62164217966	2127.80642719322	3769.87242219304	2322.28022362814	0.699013941684009	0.00384699564811945	0.105603229789845	Lipa	19	34469718	34504874	-	6780	protein_coding	lysosomal acid lipase A [Source:MGI Symbol;Acc:MGI:96789]	-	6051	2067	3424	3390	4594	2933	1947	2322	3317	2664	1750	2002	29.2634383026892	9.03233517561574	21.2323672930657	18.2180282612925	24.0611651308219	15.6958492188306	9.76689320995149	11.5602746439131	18.7128498536569	13.103606423801	8.46964228530173
ENSMUSG00000068614	4.62877855839636	1110.99542110108	121.807042225971	32.1246127425104	20.9201710844858	20.5595909892851	45.443983343614	24.8569563311409	11.7476242879545	17.9968797128984	12.1651893419061	0	218.505936116954	18.7017721695856	3.54596091893877	0.00385463045618337	0.105603229789845	Actc1	2	113877763	113884029	-	1618	protein_coding	actin, alpha, cardiac muscle 1 [Source:MGI Symbol;Acc:MGI:87905]	-	5	1259	102	31	21	20	47	26	11	19	13	0	0.101325645738169	23.0534790649698	2.65042799846508	0.698095026081666	0.460888778361202	0.448491201327681	0.987960365724816	0.542413463902811	0.260038901759362	0.391616874796779	0.263646219680909
ENSMUSG00000029687	279.57822492714	407.688550078393	250.779204582881	300.520570817032	324.760751121066	235.407316827315	221.418557142289	215.108275942565	242.428246669605	247.220295003499	198.386164652622	214.693755391124	299.789103058971	223.209215800284	0.427712108266891	0.00391210581907834	0.106051639183036	Ezh2	6	47507073	47572275	-	6678	protein_coding	enhancer of zeste 2 polycomb repressive complex 2 subunit [Source:MGI Symbol;Acc:MGI:107940]	-	302	462	210	290	326	229	229	225	227	261	212	202	1.48281995300736	2.04967414688873	1.32210892265276	1.58227858513771	1.73351076131025	1.24420378031098	1.16629724350229	1.13729134433282	1.30018034892849	1.30340807201124	1.04170838447793
ENSMUSG00000023992	1385.85630038387	307.090076682426	816.823694927099	630.056920885365	1085.85649914712	900.510085330688	260.094287647493	359.469830019576	826.60556353425	557.90327109985	158.147461444779	286.966900770315	854.365596226095	408.19788575271	1.06583012968589	0.00395717202736489	0.107085779390876	Trem2	17	48653429	48661175	+	4946	protein_coding	triggering receptor expressed on myeloid cells 2 [Source:MGI Symbol;Acc:MGI:1913150]	-	1497	348	684	608	1090	876	269	376	774	589	169	270	9.92420167901829	2.08455997308472	5.8142854020228	4.47899764774195	7.82578194301681	6.42617344362528	1.84977263165077	2.56607510503923	5.98564566257591	3.97143534291484	1.12121605029685
ENSMUSG00000089842	2.77726713503782	13.2366412363115	15.5244269503688	9.32650047363204	6.97339036149528	7.19585684624979	2.90067978789026	3.82414712786783	4.27186337743798	0.947204195415705	0.935783795531235	0	9.17234716718254	2.14661304735717	2.09255535526495	0.00397568966968195	1	Pitpnm2os2	5	124332970	124338409	+	3821	lncRNA	phosphatidylinositol transfer protein, membrane-associated 2, opposite strand 2 [Source:MGI Symbol;Acc:MGI:3840147]	-	3	15	13	9	7	7	3	4	4	1	1	0	0.025743767831095	0.116306365309643	0.143041043869315	0.0858216458265546	0.065054352559402	0.0664696590714121	0.0267032670250534	0.0353360974611861	0.0400412022599174	0.0087278902384494	0.00858775559043567
ENSMUSG00000112148	910.943620292404	277.087023213453	508.723529296702	516.066359540973	770.061535633693	397.828085642667	315.207203617408	301.151586319591	433.594132809955	362.779206844215	255.468976180027	379.434013240749	563.451692269982	341.272519835324	0.723802538890093	0.00397932309408631	0.107310003786345	Lilrb4a	10	51367052	51372707	+	5227	protein_coding	leukocyte immunoglobulin-like receptor, subfamily B, member 4A [Source:MGI Symbol;Acc:MGI:102701]	-	984	314	426	498	773	387	326	315	406	383	273	357	6.17263349866031	1.77978036171569	3.42650567311889	3.47142838114547	5.25148767424866	2.68633959795819	2.12121789150498	2.03420016002226	2.97096604826232	2.44361390362103	1.71382652617523
ENSMUSG00000059674	54.619586989077	92.6564886541802	66.874454555435	36.2697240641246	62.7605132534575	52.426957022677	39.6426237678335	36.3293977147443	45.9225313074583	35.0465552303811	32.7524328435932	32.948051569925	60.9346207564919	37.1069320723226	0.719370349040725	0.00400368060345091	0.107779081844899	Cdh24	14	54868688	54878821	-	3489	protein_coding	cadherin-like 24 [Source:MGI Symbol;Acc:MGI:1928330]	-	59	105	56	35	63	51	41	38	43	37	35	31	0.554471126022187	0.891615463725145	0.674809850805399	0.365509308767692	0.641202100935877	0.530361091303491	0.399671397287846	0.367636190826118	0.471402239532188	0.353660916664162	0.329172683831159
ENSMUSG00000028613	36.1044727554916	31.7679389671475	34.6314139662074	26.9432235904926	46.8213352843254	23.6435296376779	19.3378652526017	19.1207356393391	25.6311802646279	15.1552671266513	19.6514597061559	13.816924851904	33.3186523668904	18.7855721402133	0.828676284927811	0.00401637277993375	0.10793304559131	Lrp8	4	107659066	107734037	+	12689	protein_coding	low density lipoprotein receptor-related protein 8, apolipoprotein e receptor [Source:MGI Symbol;Acc:MGI:1340044]	-	39	36	29	26	47	23	20	20	24	16	21	13	0.100777853217274	0.0840551574147335	0.0960870713586868	0.0746581660956112	0.131530301983555	0.0657662210032639	0.0536071575394588	0.0532032580972465	0.0723449131539811	0.0420512489256712	0.054306099482398
ENSMUSG00000043230	0.925755711679272	0	5.97093344244956	4.14511132161424	10.9581848537783	9.2518159451783	0	0.956036781966956	0	0	0.935783795531235	0	5.20863354578328	0.315303429583032	3.87329153821894	0.00402723240657666	1	Fam124b	1	80176423	80196190	-	3357	protein_coding	family with sequence similarity 124, member B [Source:MGI Symbol;Acc:MGI:3026880]	-	1	0	5	4	11	9	0	1	0	0	1	0	0.00976734553496317	0	0.0626199936555821	0.0434150211767471	0.11635812129981	0.0972732927276391	0	0.0100550512659512	0	0	0.00977474355408242
ENSMUSG00000034533	0.925755711679272	6.17709924361201	5.97093344244956	9.32650047363204	1.99239724614151	0	0	0	0	0	0	0	4.0654476862524	0	4.48113666737053	0.00404596735298781	1	Scn10a	9	119437522	119548388	-	7966	protein_coding	sodium channel, voltage-gated, type X, alpha [Source:MGI Symbol;Acc:MGI:108029]	-	1	7	5	9	2	0	0	0	0	0	0	0	0.00411611586252465	0.0260343656618716	0.0263890683783316	0.0411655170353082	0.00891548657255748	0	0	0	0	0	0
ENSMUSG00000063646	11.1090685401513	40.5923664580218	4.77674675395965	10.3627783040356	5.97719173842452	7.19585684624979	2.90067978789026	0	1.0679658443595	6.63042936790994	0	4.25136149289355	13.3356681068071	2.47507274884221	2.43900652939717	0.00405728084120528	1	Jakmip1	5	37185679	37307951	+	8586	protein_coding	janus kinase and microtubule interacting protein 1 [Source:MGI Symbol;Acc:MGI:1923321]	-	12	46	4	10	6	7	3	0	1	7	0	4	0.0458266652143555	0.158728974338185	0.019586798854115	0.0424365904059923	0.0248150824727438	0.0295807788623184	0.0118836691477672	0	0.00445485190528606	0.0271890146992553	0
ENSMUSG00000026600	1348.8260719167	621.239695357551	1010.28193846246	755.446538364195	1332.91375766867	721.641643723907	499.883816779754	570.753958834273	907.770967705571	603.369072479804	459.469843605836	665.33807363784	965.058274248914	617.764288840513	0.643884843434367	0.00406444710654487	0.108847018619737	Soat1	1	156252095	156301901	-	9791	protein_coding	sterol O-acyltransferase 1 [Source:MGI Symbol;Acc:MGI:104665]	-	1457	704	846	729	1338	702	517	597	850	637	491	626	4.87933227923497	2.13027107739145	3.6327680445657	2.71288787712843	4.85271090580617	2.60143219360243	1.79590630059956	2.05817790200995	3.32059592380433	2.1696950361465	1.64555027357041
ENSMUSG00000038068	751.713637883569	2756.75114814913	833.542308565958	698.451257692	706.304823757164	826.495557769261	483.446631315043	526.776266863793	643.983404148776	671.567774549735	497.836979222617	706.788848193552	1095.54312230285	588.399984048919	0.897213665646049	0.00407322754643408	0.108893763715463	Rnf144b	13	47276132	47401467	+	4936	protein_coding	ring finger protein 144B [Source:MGI Symbol;Acc:MGI:2384986]	-	812	3124	698	674	709	804	500	551	603	709	532	665	5.39397303813362	18.7510303437819	5.94531168775725	4.9752637958311	5.10066076987722	5.90994374041271	3.4452047306432	3.76801027390371	4.67268297217342	4.79024137726715	3.5366590573503
ENSMUSG00000114835	56.4710984124356	75.890076421519	82.3988815058039	54.9227250113887	65.7491091226697	49.3430183742843	47.3777698688742	50.6699494442487	37.3788045525823	39.7825762074596	41.1744870033743	37.1994130628186	64.1291514746835	42.2638333565596	0.597817069574004	0.00412557659023905	0.109724742337303	Gm48194	13	59928876	59929392	-	517	lncRNA	predicted gene, 48194 [Source:MGI Symbol;Acc:MGI:6097578]	-	61	86	69	53	66	48	49	53	35	42	44	35	3.86871898764633	4.92830038413162	5.61116324581178	3.7352243630503	4.53324038533997	3.36862869051383	3.22348548151755	3.46035740094641	2.58941498270312	2.70922491537106	2.79266503072806
ENSMUSG00000029169	2032.95954284768	2446.13130047036	2110.12787856167	2249.75916980613	2056.15395801804	1914.09792110244	1692.06320960265	1872.87605587327	1796.31855021267	1889.67236985433	1935.20088915859	1773.88058290983	2134.87162846772	1826.66860960189	0.225040168651972	0.00416782354132167	0.110214130659654	Dhx15	5	52307545	52347856	-	8496	protein_coding	DEAH (Asp-Glu-Ala-His) box polypeptide 15 [Source:MGI Symbol;Acc:MGI:1099786]	-	2196	2772	1767	2171	2064	1862	1750	1959	1682	1995	2068	1669	8.47511744327607	9.66647171816592	8.74412589797696	9.31057894427167	8.62681621353304	7.95183979578111	7.00557402619961	7.78315290825145	7.57243654986797	7.83095466798784	7.98716661742716
ENSMUSG00000054693	2393.07851469092	3186.50076695471	2139.98254577392	2217.63455706362	2576.16963926097	1999.42022370798	1714.30175464314	1875.74416621917	1785.63889176908	2047.85547048875	1778.92499530488	2168.19436137571	2418.79770790869	1895.10993996679	0.352363557164103	0.00417324642889904	0.110214130659654	Adam10	9	70586279	70687511	+	4913	protein_coding	a disintegrin and metallopeptidase domain 10 [Source:MGI Symbol;Acc:MGI:109548]	-	2585	3611	1792	2140	2586	1945	1773	1962	1672	2162	1901	2040	17.2520884620095	21.7755928013252	15.3350641609447	15.8707838303139	18.6911969236377	14.363996493896	12.2738879161231	13.4799372134752	13.0170827077326	14.6755788144944	12.6967353195838
ENSMUSG00000024811	2930.0168274649	3463.58779016817	3712.72641451513	3393.80989457166	3243.62271671837	2933.85363417099	2558.3995729192	2732.35312286156	2575.9336165951	2626.59723388775	2870.0489008943	3134.31626063577	3279.60287960154	2749.60811796561	0.254182739790311	0.00417389505062492	0.110214130659654	Tnks2	19	36811632	36870877	+	10406	protein_coding	tankyrase, TRF1-interacting ankyrin-related ADP-ribose polymerase 2 [Source:MGI Symbol;Acc:MGI:1921743]	-	3165	3925	3109	3275	3256	2854	2646	2858	2412	2773	3067	2949	9.97281553057446	11.1749374768017	12.5612036487385	11.4672386230507	11.1110712193181	9.95113449806519	8.64820946309888	9.27073214407291	8.86579402292832	8.88694232470616	9.67134036888379
ENSMUSG00000028718	82.3922583394552	32.6503817162349	46.5732808511065	76.6845594498635	92.6464719455801	44.203120626963	23.205438303122	38.2414712786783	49.1264288405368	19.8912881037298	20.5872435016872	40.3879341824887	62.5250121548672	31.9066340350405	0.975148497027992	0.00417957844158002	0.110214130659654	Stil	4	114857356	114900393	+	5795	protein_coding	Scl/Tal1 interrupting locus [Source:MGI Symbol;Acc:MGI:107477]	-	89	37	39	74	93	43	24	40	46	21	22	38	0.503575345559543	0.189163589397543	0.282947279702149	0.465274923670629	0.569881901763619	0.269226288534703	0.140856853567184	0.232992628816552	0.303618721156887	0.120851534188683	0.1245735824751
ENSMUSG00000020300	1796.89183636947	1776.357253913	1968.01966263137	2416.5999005011	1942.58731498797	1745.50927499031	1489.98251771296	1619.52630865202	1628.64791264823	1465.3248903081	1433.62077475385	1824.89692082456	1940.9942072322	1576.99988748329	0.29963649023853	0.00420432026109689	0.110504320089719	Cpeb4	11	31822211	31885634	+	6369	protein_coding	cytoplasmic polyadenylation element binding protein 4 [Source:MGI Symbol;Acc:MGI:1914829]	-	1941	2013	1648	2332	1950	1698	1541	1694	1525	1547	1532	1717	9.99268459146669	9.36400826692124	10.8787830183875	13.3410086058515	10.8722322006701	9.67317146211668	8.22908543829514	8.97796251013626	9.1584662662347	8.10037973401242	7.89303865883746
ENSMUSG00000023274	54.619586989077	39.7099237089344	82.3988815058039	73.5757259586528	56.783321515033	58.5948343194626	58.0135957578051	23.9009195491739	43.7865996187393	26.5217174716397	24.3303786838121	27.6338497038081	60.9470456661606	34.0311767974964	0.838044356503744	0.00420486107195842	0.110504320089719	Cd4	6	124841655	124865184	-	4032	protein_coding	CD4 antigen [Source:MGI Symbol;Acc:MGI:88335]	-	59	45	69	71	57	57	60	25	41	28	26	26	0.479799047294497	0.33065968887511	0.719486953890052	0.641607146107028	0.502006902791244	0.512928441637484	0.506116980668298	0.20929319878347	0.388944369248569	0.2315921430633	0.211597015597079
ENSMUSG00000115230	73.1347012226625	17.6488549817486	14.3302402618789	15.5441674560534	44.8289380381839	21.5875705387494	0	19.1207356393391	16.0194876653924	3.78881678166282	2.80735138659371	1.06284037322339	31.1790787498795	7.13320530770191	2.13195027597977	0.00423859876175302	0.110554821300228	AU022793	15	39826041	39830420	+	1611	lncRNA	expressed sequence AU022793 [Source:MGI Symbol;Acc:MGI:2146144]	-	79	20	12	15	45	21	0	20	15	4	3	1	1.60790151328916	0.367810156712723	0.313169934751269	0.339255647323883	0.991910140181465	0.472961950301426	0	0.419054091865897	0.356139278014768	0.0828038947265429	0.0611057990894873
ENSMUSG00000046805	5576.75240715593	1914.01832277064	3839.31020349506	3196.91710679498	5202.14920967548	2708.72611283831	1760.71263124938	1711.30583972085	3816.90992774084	2447.57564095418	1190.31698791573	1823.83408045133	3739.64556045507	2125.10918467205	0.815434463586496	0.00424662761284141	0.110554821300228	Mpeg1	19	12438143	12442647	+	4334	protein_coding	macrophage expressed gene 1 [Source:MGI Symbol;Acc:MGI:1333743]	-	6024	2169	3215	3085	5222	2635	1821	1790	3574	2584	1272	1716	45.5747137194945	14.8272260081315	31.187921071816	25.935679365984	42.7861606189636	22.0594236557046	14.2902958617343	13.9411870578307	31.5420413317262	19.8833664202311	9.6306348752334
ENSMUSG00000042249	511.942908558637	587.706870892229	389.304860447711	397.930686874967	464.228558350971	313.533762586598	335.511962132639	261.954078258946	402.62312332353	296.474913165116	303.19394975212	326.29199457958	444.107941285186	321.008336868655	0.470115874309486	0.00425835186080722	0.110554821300228	Grk3	5	113058348	113163657	-	8693	protein_coding	G protein-coupled receptor kinase 3 [Source:MGI Symbol;Acc:MGI:87941]	-	553	666	326	384	466	305	347	274	377	313	324	307	2.08585130166362	2.26983251007221	1.57667534560642	1.60950715571985	1.90358201847686	1.27301232568272	1.35762546899984	1.06393847294888	1.65880687207666	1.20077315911067	1.22301573357664
ENSMUSG00000031600	930.384490237668	1140.11603182096	1010.28193846246	1007.26205115226	1006.16060930146	858.362923802653	862.468790266036	787.774308340772	860.780470553753	818.384424839169	830.976010431737	880.031829028964	992.094674129578	840.069305576739	0.240515301750763	0.00427193433420584	0.110554821300228	Vps37a	8	40964824	41003798	+	9090	protein_coding	vacuolar protein sorting 37A [Source:MGI Symbol;Acc:MGI:1261835]	-	1005	1292	846	972	1010	835	892	824	806	864	888	828	3.62518414253858	4.21102570904149	3.91291880355806	3.89613277667246	3.94559811316627	3.33292116463002	3.33749906512777	3.05984169969566	3.39152727368334	3.16983147099708	3.2055739197598
ENSMUSG00000040274	492.502038613373	648.595420579261	392.887420513181	477.724079816041	660.47968709591	423.527574379273	366.452546536802	313.580064485162	428.254303588158	441.397155063719	349.983139528682	370.931290254962	515.952703499506	378.433083242914	0.44849885526701	0.00427868563939149	0.110554821300228	Cdk6	5	3391485	3581008	+	13989	protein_coding	cyclin-dependent kinase 6 [Source:MGI Symbol;Acc:MGI:1277162]	-	532	735	329	461	663	412	379	328	401	466	374	349	1.24696095554962	1.5566462556694	0.988788903465417	1.20073072106024	1.6829926328732	1.06859464816732	0.921452009239027	0.79144876179382	1.09643239273524	1.11092709758522	0.877286902390053
ENSMUSG00000026358	484.170237208259	136.778626108552	214.953603928184	169.949564186184	355.642908436259	167.560666562674	99.5900060508988	104.208009234398	240.292314980887	96.6148279324019	21.5230272972184	98.844154709775	254.842601071685	110.178723367596	1.21114850153479	0.004293448978445	0.110554821300228	Rgs1	1	144118034	144124980	-	6947	protein_coding	regulator of G-protein signaling 1 [Source:MGI Symbol;Acc:MGI:1354694]	-	523	155	180	164	357	163	103	109	225	102	23	93	2.46849517727591	0.661033792874266	1.08935532938886	0.860157372924132	1.8248462268034	0.851319839433962	0.504266488181041	0.529620551875339	1.2388233270803	0.48965386459101	0.108639373046532
ENSMUSG00000024516	698.019806606171	749.193893975229	609.035211129855	687.05220155756	706.304823757164	691.830236789444	629.447513972185	614.731650804753	588.449180242082	581.583375985243	482.864438494117	449.581477873493	690.23936230257	557.776272895312	0.307843235494937	0.00430078407082454	0.110554821300228	Sec11c	18	65933586	65950755	+	6808	protein_coding	SEC11 homolog C, signal peptidase complex subunit [Source:MGI Symbol;Acc:MGI:1913536]	-	754	849	510	663	709	673	651	643	551	614	516	423	3.63144684731155	3.69468489961885	3.1495244576355	3.54834099213776	3.69812890130934	3.58672405994808	3.25223278153528	3.18806418407317	3.09568103860034	3.00770430685733	2.48706346670156
ENSMUSG00000119926	14.8120913868683	17.6488549817486	20.3011737043285	11.3990561344392	16.9353765922028	10.2797954946426	1.93378652526017	12.4284781655704	8.54372675487596	1.89440839083141	1.87156759106247	4.25136149289355	15.2293913823717	5.15388815341567	1.56819910651092	0.00431917198622595	1	Gm25047	X	35627552	35627655	+	104	snRNA	predicted gene, 25047 [Source:MGI Symbol;Acc:MGI:5454824]	-	16	20	17	11	17	10	2	13	8	2	2	4	5.04445830167252	5.69752079292497	6.87242388063541	3.85381367065803	5.80458183956192	3.48874405648167	0.654058867325185	4.21935088747475	2.94225834298355	0.641332088482984	0.631034886751052
ENSMUSG00000069441	61.0998769708319	30.8854962180601	51.3500276050662	52.8501693505816	37.8555476766886	62.7067525173196	19.3378652526017	33.4612873688435	33.1069411751444	38.8353720120439	12.1651893419061	21.2568074644677	49.457978389758	26.3605771025012	0.906905670428559	0.00432551191898297	0.110554821300228	Dsg1a	18	20443868	20476407	+	5686	protein_coding	desmoglein 1 alpha [Source:MGI Symbol;Acc:MGI:94930]	-	66	35	43	51	38	61	20	35	31	41	13	20	0.380596660467378	0.182368762629677	0.317947896735031	0.326809511546225	0.237318775009297	0.389247138486101	0.119630886742559	0.20777668809232	0.208535017977905	0.240471335322849	0.0750227899127174
ENSMUSG00000029189	136.086089616853	416.512977569267	557.685183524789	59.0678363330029	52.7985270227499	52.426957022677	89.9210734245979	33.4612873688435	90.7770967705571	63.4626810928523	22.4588110927496	22.3196478376911	212.429595181556	53.7334329312153	1.98299226561952	0.00432743497237237	0.110554821300228	Sel1l3	5	53264425	53371269	-	9850	protein_coding	sel-1 suppressor of lin-12-like 3 (C. elegans) [Source:MGI Symbol;Acc:MGI:1916941]	-	147	472	467	57	53	51	93	35	85	67	24	21	0.489338061649553	1.41969492732538	1.99331073774082	0.210848245866736	0.191071096444702	0.187860898229226	0.321119663186253	0.119940938933292	0.330070605989525	0.22684274073855	0.0799524404736358
ENSMUSG00000060568	289.761537755612	584.177099895879	231.672217567043	205.183010419905	272.958422721387	148.029055122853	141.166416343992	182.603025355689	182.622159385474	160.077509025254	191.835678083903	153.049013744168	288.63022391378	168.558966989747	0.777347872071772	0.00433166920849127	0.110554821300228	Fam78b	1	166828986	166918871	+	6325	protein_coding	family with sequence similarity 78, member B [Source:MGI Symbol;Acc:MGI:2443050]	-	313	662	194	198	274	144	146	191	171	169	205	144	1.62260085608739	3.10089258143319	1.28954219219437	1.14060698679397	1.53831540665107	0.826046339760783	0.785077457823369	1.01931512348797	1.03409332750236	0.891071366575251	1.06353073403418
ENSMUSG00000041842	77.7634797810588	326.503817162349	35.8256006546973	49.7413358593709	74.7148967303065	68.8746298141051	29.0067978789025	26.7690298950748	48.0584629961773	61.5682727020208	55.2112439363429	17.0054459715742	105.570626666981	39.6032088966821	1.41613725240161	0.00434102940241954	0.110554821300228	Fhdc1	3	84349505	84387736	-	6270	protein_coding	FH2 domain containing 1 [Source:MGI Symbol;Acc:MGI:2684972]	-	84	370	30	48	75	67	30	28	45	65	59	16	0.439278187035597	1.74833014443184	0.201162984403626	0.278936317876249	0.424765347111202	0.387712417632604	0.162732349765118	0.150739170461618	0.274516926737699	0.34572607002751	0.308774327360802
ENSMUSG00000047789	550.824648449167	491.520611241699	506.335155919722	454.925967547163	469.209551466325	480.066449599807	365.485653274172	387.194896696617	438.933962031753	406.350599833338	332.203247413588	466.586923845067	492.147064037314	399.459213849089	0.302386743561371	0.00435008843679884	0.110554821300228	Slc38a9	13	112797285	112875283	+	16704	protein_coding	solute carrier family 38, member 9 [Source:MGI Symbol;Acc:MGI:1918839]	-	595	557	424	439	471	467	378	405	411	429	355	439	1.16795034014119	0.98792500147437	1.06718504704931	0.957580747929528	1.00128055565804	1.01437572638411	0.769646856809378	0.818408577311913	0.941121068400448	0.856491632535824	0.697372127000983
ENSMUSG00000022360	542.492847044053	376.803053860333	438.266514675797	466.325023681602	499.095510158448	377.268494653382	316.174096880038	291.591218499922	362.040421237869	351.412756499227	253.597408588965	431.513191528695	450.041907345603	334.388182205786	0.429569530134054	0.00437380954304148	0.110554821300228	Atad2	15	57957440	57998478	-	16023	protein_coding	ATPase family, AAA domain containing 2 [Source:MGI Symbol;Acc:MGI:1917722]	-	586	427	367	450	501	367	327	305	339	371	271	406	1.19917254391004	0.789538486463871	0.962978492960826	1.02329310585803	1.11032277927147	0.831045267102243	0.694103287773666	0.642527377235124	0.80924499266857	0.772176162454829	0.554986183866681
ENSMUSG00000015647	3315.13120352347	10524.0122256167	2984.27253453629	2947.17414966773	3761.64600071517	3106.55419848098	2138.76789693775	1794.48103975198	1729.03670201802	2820.77409394797	2307.64283978003	3695.49597769772	4439.79838542339	2414.36642502224	0.878954820638189	0.00439123909284866	0.110554821300228	Lama5	2	179818166	179867652	-	11388	protein_coding	laminin, alpha 5 [Source:MGI Symbol;Acc:MGI:105382]	-	3581	11926	2499	2844	3776	3022	2212	1877	1619	2978	2466	3477	10.3106193940007	31.0267730485951	9.22599370277083	9.09941559099331	11.7744297750125	9.62829638236312	6.60629321700142	5.5635557539797	5.4378039466785	8.72094502055856	7.10562571108719
ENSMUSG00000035293	313.831186259273	381.21526760577	298.546672122478	290.157792512997	316.7911621365	298.114069344634	214.650304303879	171.130583972085	259.515700179357	268.058787302645	216.166056767715	295.469623756102	316.442691663609	237.498509380297	0.416171396249436	0.00440079662754713	0.110554821300228	G2e3	12	51394844	51423769	+	7886	protein_coding	G2/M-phase specific E3 ubiquitin ligase [Source:MGI Symbol;Acc:MGI:2444298]	-	339	432	250	280	318	290	222	179	243	283	231	278	1.40951862385689	1.62299146705892	1.33283869326521	1.29369716286125	1.43194291147373	1.3342698547234	0.957450616840215	0.766181900946468	1.178619592377	1.19678455669739	0.961195924379107
ENSMUSG00000010461	61.0998769708319	90.0091604069179	274.66293835268	111.918005683584	81.6882870918018	71.9585684624979	60.9142755456954	42.0656184065461	70.4857457277267	31.2577384487183	62.6975143005927	69.0846242595202	115.222806161386	56.0842527814666	1.0364242177115	0.00441451935771012	0.110570137763746	Eya4	10	22978862	23226684	-	9418	protein_coding	EYA transcriptional coactivator and phosphatase 4 [Source:MGI Symbol;Acc:MGI:1337104]	-	66	102	230	108	82	70	63	44	66	33	67	65	0.229780485391539	0.320871207110576	1.02674715016801	0.417826938250073	0.309179380708931	0.269675692622495	0.22751081432972	0.157699247440127	0.26804604568697	0.116853457616989	0.233438686073547
ENSMUSG00000030342	1670.98905958109	4768.72061606848	1841.43587365144	1111.92611202302	1433.52981859881	1051.62307910193	967.860155892715	913.97116356041	1216.41309672547	1378.18210432985	1050.88520238158	926.796805450793	1979.7040931708	1075.68475472347	0.880196121297787	0.00443375915777915	0.110742364999122	Cd9	6	125437229	125471754	-	2044	protein_coding	CD9 antigen [Source:MGI Symbol;Acc:MGI:88348]	-	1805	5404	1542	1073	1439	1023	1001	956	1139	1455	1123	872	28.9550425755249	78.3292036682123	31.7174189274128	19.1271470884216	24.9997265966812	18.1592200419373	16.656101840514	15.7874733793576	21.3140994542844	23.7393276979562	18.0283332909562
ENSMUSG00000031748	713.757653704719	1013.92671870146	665.161985488881	705.705202504824	496.106914289235	519.129672479449	407.062063567266	439.7769197048	530.779024646669	493.493385811582	413.616437624806	604.756172364107	685.631357861428	481.580667286538	0.510611353847005	0.00444183682126538	0.110742364999122	Gnao1	8	94536594	94696016	+	11053	protein_coding	guanine nucleotide binding protein, alpha O [Source:MGI Symbol;Acc:MGI:95775]	-	771	1149	557	681	498	505	421	460	497	521	442	569	2.28718924987169	3.07984685004687	2.11869958412913	2.24490676665886	1.59994306914062	1.65772946572349	1.29545433126599	1.40479609752168	1.71988882240267	1.57196860048684	1.31219631204978
ENSMUSG00000028528	386.040131770256	310.619847678776	445.431634806737	435.236688769495	292.882395182802	288.862253399456	91.8548599498581	75.5269057753896	324.661616685287	248.167499198915	146.918055898404	273.14997591841	359.845491934587	193.379818904377	0.896664386446641	0.00444336244166469	0.110742364999122	Dnajc6	4	101353828	101499996	+	5926	protein_coding	DnaJ heat shock protein family (Hsp40) member C6 [Source:MGI Symbol;Acc:MGI:1919935]	-	417	352	373	420	294	281	95	79	304	262	157	257	2.30729062212004	1.75982822466586	2.64631501436947	2.58237322637288	1.76173685579446	1.72047006929835	0.545233007861359	0.449988147297341	1.9621675618412	1.47443610757546	0.869350120728246
ENSMUSG00000045532	0	16.7664122326612	9.55349350791929	0	3.98479449228301	4.11191819785702	0	0	0	0	0.935783795531235	0	5.73610307178675	0.155963965921873	4.50036058689903	0.00444950179434684	1	C1ql1	11	102830090	102837514	-	1473	protein_coding	complement component 1, q subcomponent-like 1 [Source:MGI Symbol;Acc:MGI:1344400]	-	0	19	8	0	4	4	0	0	0	0	1	0	0	0.382155501928708	0.228339789492778	0	0.0964300964521288	0.0985280059400119	0	0	0	0	0.022276859545862
ENSMUSG00000040522	619.330571113433	207.374046035546	460.956061757106	475.651524155234	496.106914289235	339.233251323204	137.298843293472	169.218510408151	367.380250459666	290.791687992622	165.633731809029	337.983238685037	433.108728112293	244.71771044133	0.824211730783132	0.00445001298723778	0.110742364999122	Tlr8	X	166025692	166047325	-	3586	protein_coding	toll-like receptor 8 [Source:MGI Symbol;Acc:MGI:2176887]	-	669	235	386	459	498	330	142	177	344	307	177	318	6.1170738775301	1.94154222224047	4.52555008471225	4.66373394976758	4.9314475022898	3.33892069209289	1.3467849069518	1.66609059025774	3.6692078387681	2.85505450656507	1.61964447787414
ENSMUSG00000025877	731.347012226625	186.195420057448	449.014194872207	346.116795354789	578.791400004108	415.303737983559	204.014478414948	188.33924604749	449.613620475348	248.167499198915	116.972974441404	227.447839869805	451.128093416456	239.092609741318	0.916608595396271	0.0044697370347194	0.111054670241447	Hk3	13	55153798	55169198	-	3682	protein_coding	hexokinase 3 [Source:MGI Symbol;Acc:MGI:2670962]	-	790	211	376	334	581	404	211	197	421	262	125	214	7.03511498617284	1.69780548995037	4.2933709848926	3.30517188444959	5.60334941166389	3.98107197928121	1.94903147536446	1.80600135759376	4.3734328927618	2.37303323560352	1.11399423245025
ENSMUSG00000033364	259.211599270196	302.677862936989	292.575738680028	297.411737325822	317.78736075957	250.827010069278	242.690208920151	219.8884598524	206.117407961383	197.018472646467	197.450380857091	280.589858530974	286.748551506981	223.959131461411	0.357515425171699	0.0045043456101015	0.111556425118018	Usp37	1	74474670	74583443	-	11081	protein_coding	ubiquitin specific peptidase 37 [Source:MGI Symbol;Acc:MGI:2442483]	-	280	343	245	287	319	244	251	230	193	208	211	264	0.828527579554551	0.917074098570614	0.929568686615618	0.943700769062531	1.02227345753094	0.798938445783584	0.770397647895345	0.700623195826509	0.666196749620587	0.625994753996205	0.624827612799616
ENSMUSG00000026228	32.4014499087745	4.41221374543715	29.8546672122478	18.6530009472641	13.9467807229906	12.3357545935711	4.83446631315042	1.91207356393391	6.40779506615697	14.2080629312356	3.74313518212494	3.18852111967016	18.6006445217142	5.71567569604533	1.69528790156847	0.00454319676868466	1	Htr2b	1	86026748	86039692	-	2131	protein_coding	5-hydroxytryptamine (serotonin) receptor 2B [Source:MGI Symbol;Acc:MGI:109323]	-	35	5	25	18	14	12	5	2	6	15	4	3	0.538533206771702	0.0695145662205768	0.493231625297487	0.307765845803158	0.233292051740474	0.204314996831963	0.0798007064779672	0.0316797814169855	0.107694111099351	0.234743795878333	0.0615932690963016
ENSMUSG00000046179	89.7983040328894	36.1801527125847	66.874454555435	44.5599467073531	93.6426705686508	44.203120626963	36.7419439799432	32.5052505868765	39.5147362413013	40.7297804028753	20.5872435016872	37.1994130628186	62.543108200646	34.5463946292504	0.857590831160617	0.00454427764413079	0.112116739926767	E2f8	7	48516177	48531344	-	5443	protein_coding	E2F transcription factor 8 [Source:MGI Symbol;Acc:MGI:1922038]	E2F	97	41	56	43	94	43	38	34	37	43	22	35	0.584334183208621	0.223169471440677	0.432557701535925	0.287846854762292	0.613260335061302	0.286637211475033	0.237446320381144	0.21085126610199	0.260008499536117	0.263461060049229	0.132629783289216
ENSMUSG00000079625	218.478347956308	33.5328244653224	174.351256519527	121.244506157217	155.406985199038	97.6580571991043	16.4371854647114	27.7250666770417	121.748106256982	59.6738643111894	3.74313518212494	32.948051569925	133.445329582753	43.7125682436625	1.61189622939752	0.00455076270942342	0.112116739926767	Tm4sf19	16	32219324	32227045	+	1257	protein_coding	transmembrane 4 L six family member 19 [Source:MGI Symbol;Acc:MGI:3645933]	-	236	38	146	117	156	95	17	29	114	63	4	31	6.1560851509671	0.895648455594251	4.88328345751173	3.39142292214992	4.40701650826209	2.74214727748917	0.459974573361546	0.778750521793272	3.46891556428132	1.67144305638047	0.104419456200651
ENSMUSG00000056025	37.9559841788501	495.932824987136	197.040803600835	148.187729747709	180.311950775806	253.910948717671	83.1528205861873	59.2742804819513	75.8255749495242	180.9160013244	97.3215147352484	58.4562205272863	218.890040334668	92.4910687674329	1.24262484362478	0.00456247135284216	0.112116739926767	Clca3a1	3	144435438	144466738	-	3899	protein_coding	chloride channel accessory 3A1 [Source:MGI Symbol;Acc:MGI:1316732]	-	41	562	165	143	181	247	86	62	71	191	104	55	0.344793059090979	4.27043723140393	1.77920120983817	1.33633138823536	1.64846866538801	2.29850877976151	0.750179855008522	0.536752510948314	0.696513067600363	1.63367794378379	0.875259468466193
ENSMUSG00000048612	2032.033787136	9786.29008737961	1730.37651162188	1327.47190074696	2235.46971017077	1309.64594601746	941.754037801703	940.740193455485	1428.93829975301	1518.36832525138	1052.75676997264	957.619176274272	3070.21465717878	1140.02946708475	1.42934663901348	0.00456318535783083	0.112116739926767	Myof	19	37887484	38032025	-	12603	protein_coding	myoferlin [Source:MGI Symbol;Acc:MGI:1919192]	-	2195	11090	1449	1281	2244	1274	974	984	1338	1603	1125	901	5.71068863120786	26.0703506376575	4.83380142503995	3.70345063916777	6.32272470788749	3.66773492428466	2.62848317958311	2.63546220631606	4.06075074330364	4.24175811851048	2.92910742481445
ENSMUSG00000038526	0.925755711679272	42.3572519561967	171.962883142547	14.5078896256498	7.96958898456603	6.16787729678553	10.6358258889309	0.956036781966956	7.47576091051647	14.2080629312356	5.61470277318741	1.06284037322339	40.6485411195708	6.65887160984346	2.60436871506294	0.00457430619513241	0.112211863065697	Car14	3	95805080	95812003	-	2543	protein_coding	carbonic anhydrase 14 [Source:MGI Symbol;Acc:MGI:1344341]	-	1	48	144	14	8	6	11	1	7	15	6	1	0.0128938179161901	0.559221859974075	2.38073188305605	0.200591738622175	0.111711782991731	0.0856066178232231	0.147118235198587	0.0132736166338175	0.105287262765042	0.196712162413184	0.0774215039977696
ENSMUSG00000002814	300.870606295763	253.261068988093	303.323418876437	286.012681191383	262.000237867608	221.015603134815	168.239427697635	203.635834558962	161.262842498284	251.956315980578	209.615570198997	229.573520616252	271.080602725683	204.047251925118	0.408677871928333	0.00461585132448244	0.112553212164422	Top3a	11	60630884	60668191	-	4599	protein_coding	topoisomerase (DNA) III alpha [Source:MGI Symbol;Acc:MGI:1197527]	-	325	287	254	276	263	215	174	213	151	266	224	216	2.3171163649235	1.84887584939361	2.32201308763881	2.18663874760458	2.03070900932041	1.69620172000283	1.28678509057584	1.56333418400891	1.2558497776205	1.92887702715734	1.59823752139079
ENSMUSG00000022421	207.369279416157	223.25801551912	162.409389634628	169.949564186184	176.327156283523	159.33683016696	137.298843293472	89.8674575048939	159.126910809565	153.447079657344	118.844542032467	134.98072739937	183.108372534429	132.260926782852	0.472587069487204	0.00462005770114604	0.112553212164422	Nptxr	15	79670552	79688967	-	5170	protein_coding	neuronal pentraxin receptor [Source:MGI Symbol;Acc:MGI:1920590]	-	224	253	136	164	177	155	142	94	149	162	127	127	1.42064434956193	1.44983720602942	1.10596840787015	1.15580527460424	1.21573264879572	1.08778634797842	0.934152935460187	0.613723765450873	1.10235094977933	1.04498675307169	0.806064679323781
ENSMUSG00000040010	284.207003485536	286.793893453415	320.042032515296	180.312342490219	258.015443375325	291.946192047849	132.464376980322	157.746069024548	215.729100560618	257.639541153072	158.147461444779	195.562628673103	270.219484561273	186.21486297274	0.537388055706703	0.00462457800481764	0.112553212164422	Slc7a5	8	122607889	122634433	-	3708	protein_coding	solute carrier family 7 (cationic amino acid transporter, y+ system), member 5 [Source:MGI Symbol;Acc:MGI:1298205]	-	307	325	268	174	259	284	137	165	202	272	169	184	2.71472937998584	2.59676648868479	3.03871118727505	1.70978258762939	2.48036386240307	2.77895211575628	1.25661148080491	1.50203429651205	2.08370291496084	2.44633254031913	1.49555948888032
ENSMUSG00000002297	236.993462189894	127.07175586859	180.322189961977	131.607284461252	238.09147091391	142.889157375532	89.9210734245979	108.988193144233	132.427764700577	152.499875461929	103.872001303967	106.284037322339	176.162553461859	115.66549089294	0.60716454492715	0.00464599615820745	0.112778560098579	Dbf4	5	8446973	8472716	-	8728	protein_coding	DBF4 zinc finger [Source:MGI Symbol;Acc:MGI:1351328]	-	256	144	151	127	239	139	93	114	124	161	111	100	0.961729905360113	0.488806550153783	0.727371978092808	0.530176349492243	0.972385602820881	0.577833227320108	0.362400169842415	0.440885427288837	0.543414350239399	0.615173263609021	0.417315921898152
ENSMUSG00000018398	3792.82115074998	3479.47175965174	3053.5353624687	3261.16633228	3766.62699383052	3096.27440298634	2262.5302345544	2743.82556424516	3162.24686514847	2967.5907442374	2365.66143510296	3007.83825622219	3408.31600032788	2751.6155165851	0.309062299096317	0.00466265895914197	0.112778560098579	Septin8	11	53410084	53440392	+	6087	protein_coding	septin 8 [Source:MGI Symbol;Acc:MGI:894310]	-	4097	3943	2557	3147	3781	3012	2340	2870	2961	3133	2528	2830	22.0694014790028	19.1916686922649	17.6612640026442	18.8375669256736	22.0576241486668	17.9537062297482	13.0747302408623	15.9152778669986	18.6062675203656	17.1649841510258	13.6279484266053
ENSMUSG00000001517	358.267460419878	125.306870370415	242.419897763452	152.332841069323	332.730340105632	175.784502958388	116.99408477824	105.164046016365	144.175388988532	216.909760750197	100.128866121842	103.095516202669	231.140318781181	131.077943809641	0.818121156047454	0.00467402221145767	0.112869250875434	Foxm1	6	128339930	128353109	+	5754	protein_coding	forkhead box M1 [Source:MGI Symbol;Acc:MGI:1347487]	Fork_head	387	142	203	147	334	171	121	110	135	229	107	97	2.20530671843191	0.731152129561313	1.48327110519511	0.930848159336114	2.061256157139	1.07827292840581	0.715213485090384	0.645295234789326	0.897404134851603	1.327247568588	0.610197794557326
ENSMUSG00000037204	720.237943686473	525.053435707021	739.201560175255	767.881872329038	619.635543550009	776.124559845513	520.188575294986	487.578758803148	655.73102843673	550.325637536525	359.340977483994	513.351900266896	691.355819215552	514.419479637046	0.426496989603659	0.00468949724013295	0.113066554174483	Atg101	15	101182153	101188826	+	1597	protein_coding	autophagy related 101 [Source:MGI Symbol;Acc:MGI:1915368]	-	778	595	619	741	622	755	538	510	614	581	384	483	15.9735915037933	11.0382776038258	16.2959652193372	16.9061477039671	13.8305937617438	17.1531736577922	11.4577024873446	10.7795564313694	14.7057646172165	12.1327019769868	7.89010934166876
ENSMUSG00000059401	360.118971843237	237.377099504519	230.478030878553	194.820232115869	295.870991052014	175.784502958388	187.577292950236	164.438326498317	173.010466786238	187.54643069231	160.019029035841	182.808544194423	249.074971392097	175.900015026227	0.50321694127448	0.00469707529955072	0.113073139287318	Mamld1	X	70093846	70199662	+	4812	protein_coding	mastermind-like domain containing 1 [Source:MGI Symbol;Acc:MGI:3045303]	-	389	269	193	188	297	171	194	172	162	198	171	172	2.6506468860721	1.6562119877688	1.68626585658542	1.42352008026725	2.19172563518151	1.28935628222091	1.37118575510733	1.2065309270917	1.28769660646786	1.37222676288878	1.1660769353679
ENSMUSG00000117289	6.4802899817549	2.64732824726229	7.16512013093947	3.10883349121068	1.99239724614151	5.13989774732128	0	0.956036781966956	0	0	0.935783795531235	1.06284037322339	4.42231114077169	0.49244349178693	3.1567809823347	0.00472042458194828	1	1700093J21Rik	16	95883876	95890270	+	647	lncRNA	RIKEN cDNA 1700093J21 gene [Source:MGI Symbol;Acc:MGI:1921546]	-	7	3	6	3	2	5	0	1	0	0	1	1	0.354749385975424	0.137374535347186	0.389889308256796	0.16894616625619	0.109769344724873	0.280393649052623	0	0.0521712629054065	0	0	0.050716868796066
ENSMUSG00000027322	1456.21373447149	660.949619066486	1301.663490454	1182.39300449046	1680.58707712036	994.056224331935	584.003530628571	599.435062293282	909.90689939429	1146.117076453	553.984006954491	821.575608501678	1212.64385832246	769.170364037553	0.65677036749026	0.004722346959409	0.113360141312845	Siglec1	2	130911140	130928685	-	7143	protein_coding	sialic acid binding Ig-like lectin 1, sialoadhesin [Source:MGI Symbol;Acc:MGI:99668]	-	1573	749	1090	1141	1687	967	604	627	852	1210	592	773	7.22064453387242	3.10663642507128	6.41564321391433	5.82017926533243	8.38667452781793	4.9118859340928	2.87591780833675	2.9629377084661	4.56229223111938	5.64925311596659	2.71955452243376
ENSMUSG00000009585	878.542170383629	1155.11755855545	652.025931915492	839.385042626884	924.472322209659	737.061336965871	726.136840235194	500.963273750685	582.041385175925	649.782078055174	601.708980526584	777.999153199519	864.43406044283	639.771951823847	0.435133954359986	0.0047309678459912	0.113360141312845	Apobec3	15	79775860	79800107	+	9454	protein_coding	apolipoprotein B mRNA editing enzyme, catalytic polypeptide 3 [Source:MGI Symbol;Acc:MGI:1933111]	-	949	1309	546	810	928	717	751	524	545	686	643	732	3.29138365071577	4.10216675833316	2.42812701525654	3.12176917530081	3.48568176868677	2.75173119106966	2.70174602144945	1.87090320713922	2.20498205627654	2.41988557862968	2.2317836337432
ENSMUSG00000018474	2086.65337412508	3866.86412650112	1995.48595646664	2104.68027354963	2143.81943684826	1760.92896823227	1528.65824821816	1382.42918672422	1905.25106633734	1800.63517548526	1620.7775338601	1600.63760207442	2326.40535595383	1639.73146878325	0.504929990456717	0.0047483187390437	0.113429872627415	Chd3	11	69234099	69260232	-	8443	protein_coding	chromodomain helicase DNA binding protein 3 [Source:MGI Symbol;Acc:MGI:1344395]	-	2254	4382	1671	2031	2152	1713	1581	1446	1784	1901	1732	1506	8.7535660994675	15.3767603690519	8.3209711607412	8.76485026618148	9.05108897972336	7.36144416854581	6.36876555733011	5.78105543838777	8.08206271354666	7.50881909400923	6.73143740854515
ENSMUSG00000072640	220.329859379667	358.271756129497	214.953603928184	196.892787776676	159.391779691321	216.903684936958	141.166416343992	159.658142588482	161.262842498284	184.704818106063	145.046488307341	156.237534863838	227.790578640384	158.012707118	0.529398423431247	0.00474853397910489	0.113429872627415	Lyrm9	11	78717410	78737696	+	8146	protein_coding	LYR motif containing 9 [Source:MGI Symbol;Acc:MGI:1913524]	-	238	406	180	190	160	211	146	167	151	195	155	147	0.957988827975373	1.47662728922455	0.929014420975253	0.849846641209324	0.697478674559223	0.939810944947629	0.609577083320993	0.692002551640838	0.709017079213934	0.798319098602683	0.624372843998708
ENSMUSG00000033386	689.688005201058	921.270230047278	593.510784179486	650.782477493436	610.669755942372	612.675811480696	376.121479163103	477.062354201511	543.594614778983	590.108213743984	445.433086672868	598.379130124767	679.766177390721	505.116479780869	0.429557637434714	0.00475605879709603	0.113434567211478	Frrs1	3	116653113	116701826	+	7260	protein_coding	ferric-chelate reductase 1 [Source:MGI Symbol;Acc:MGI:108076]	-	745	1044	497	628	613	596	389	499	509	623	476	563	3.36470927353294	4.26042711854422	2.87815463897491	3.15176907660928	2.99832848351768	2.97859933329146	1.82235575320301	2.32006181030292	2.68166989745484	2.86178985378715	2.151429134554
ENSMUSG00000025907	1316.42462200792	1261.89313119503	1499.89848074333	1503.63913191557	1344.86814114552	1192.45627737854	947.555397377483	1017.22313601284	1008.15975707536	1245.57351697165	1124.81212222854	1267.9685652555	1353.19663073098	1101.8820824869	0.296092878573098	0.00476404405257851	0.11345021213825	Rb1cc1	1	6276421	6346872	+	14690	protein_coding	RB1-inducible coiled-coil 1 [Source:MGI Symbol;Acc:MGI:1341850]	-	1422	1430	1256	1451	1350	1160	980	1064	944	1315	1202	1193	3.17399101990191	2.88405477305582	3.59469625989717	3.59895970144798	3.2633776089156	2.86509246408406	2.26894757514578	2.44486826100647	2.45795741219156	2.98531573931017	2.68496967743279
ENSMUSG00000018581	1.85151142335854	43.2396947052841	1.19418668848991	0	0	5.13989774732128	0.966893262630085	0	0	0	0.935783795531235	0	8.57088176074231	0.317112843026887	4.60382345766058	0.00478652723281572	1	Dnah11	12	117841717	118162778	-	14458	protein_coding	dynein, axonemal, heavy chain 11 [Source:MGI Symbol;Acc:MGI:1100864]	-	2	49	1	0	0	5	1	0	0	0	1	0	0.00453575583910242	0.100410035830494	0.00290794464935384	0	0	0.01254770306661	0.00235240428142963	0	0	0	0.0022695956640652
ENSMUSG00000027966	0	118.247328377716	23.8837337697982	5.1813891520178	15.9391779691321	3.08393864839277	0.966893262630085	0	6.40779506615697	6.63042936790994	4.67891897765618	0	27.7225946528428	3.11400611239219	3.15558380914864	0.00480262066072358	0.11366290402471	Col11a1	3	113824189	114014367	+	12744	protein_coding	collagen, type XI, alpha 1 [Source:MGI Symbol;Acc:MGI:88446]	-	0	134	20	5	16	3	1	0	6	7	5	0	0	0.311521695583029	0.0659809537670399	0.0142953768528661	0.0445830295273025	0.00854118130588733	0.0026687901052189	0	0.0180081725323852	0.0183180226151762	0.0128742208533642
ENSMUSG00000038244	919.275421697517	1049.22442866495	1030.58311216679	940.940270006433	901.559753879032	884.06241253926	666.189457952129	490.446869149049	768.935407938837	1040.97741076186	596.094277753397	615.384576096341	954.274233158998	696.337999941935	0.454563859494886	0.00481653110368706	0.11366290402471	Mical2	7	111825063	112012313	+	15218	protein_coding	microtubule associated monooxygenase, calponin and LIM domain containing 2 [Source:MGI Symbol;Acc:MGI:2444947]	-	993	1189	863	908	905	860	689	513	720	1099	637	579	2.13953581995961	2.31480033897335	2.38422683716183	2.17400048117408	2.11176873647912	2.05042231838429	1.53986207770579	1.13787725339705	1.80966868775963	2.40838784285882	1.37353131743605
ENSMUSG00000060657	1680.24661669788	1791.35878064748	1471.23800021957	1985.50832305322	1730.3970082739	1739.34139769352	1371.05464640946	1370.95674534062	1484.4725236597	1453.95843996311	1421.45558541195	1650.59109961592	1733.0150210976	1458.74817340012	0.249099083626273	0.00482069949973214	0.11366290402471	Marf1	16	13927037	13981215	-	10153	protein_coding	meiosis regulator and mRNA stability 1 [Source:MGI Symbol;Acc:MGI:2444505]	-	1815	2030	1232	1916	1737	1692	1418	1434	1390	1535	1519	1553	5.86151844912652	5.92367078598601	5.10165020468047	6.87594644905673	6.07520292555189	6.04656076165633	4.75009205565743	4.76749663952628	5.23654173719223	5.04197058039119	4.90930598194544
ENSMUSG00000084033	1.85151142335854	4.41221374543715	3.58256006546973	6.21766698242136	4.98099311535377	6.16787729678553	0	0	2.13593168871899	0	0.935783795531235	0	4.53547043813768	0.511952580708371	3.19425559025331	0.00485202773218398	1	Gm7645	2	180933941	180934728	+	788	processed_pseudogene	predicted gene 7645 [Source:MGI Symbol;Acc:MGI:3646877]	-	2	5	3	6	5	6	0	0	2	0	1	0	0.0832207587839375	0.187989264741179	0.160062425407454	0.277431902456231	0.225319689203658	0.276266026807686	0	0	0.0970795899969191	0	0.0416418960800186
ENSMUSG00000029816	8171.64566699293	3356.81221752859	3834.53345674111	2974.11737325822	5117.47232671446	3847.72745364471	1444.53853436935	1389.12144419799	4084.96935467507	1879.25312370476	383.671356167806	1073.46877695562	4550.38474914667	1709.17043167843	1.41275151359177	0.0048540561994934	0.113842327139331	Gpnmb	6	49013480	49047863	+	6514	protein_coding	glycoprotein (transmembrane) nmb [Source:MGI Symbol;Acc:MGI:1934765]	-	8827	3804	3211	2870	5137	3743	1494	1453	3825	1984	410	1010	44.4317343088136	17.3014306571523	20.7246358106062	16.053343908477	28.0038129514916	20.8484859741285	7.80051048276927	7.52928073626136	22.4599011521119	10.1573455487584	2.06534599102432
ENSMUSG00000103034	39.8074956022087	30.8854962180601	33.4372272777175	33.1608905729139	21.9163697075566	41.1191819785702	22.238545040492	14.3405517295043	18.1554193541114	18.9440839083141	21.5230272972184	22.3196478376911	33.3877768928378	19.5868791945552	0.769923665352537	0.00486257597811453	0.11386961205028	Gm8797	3	5815866	5816355	+	490	protein_coding	predicted pseudogene 8797 [Source:MGI Symbol;Acc:MGI:3643769]	-	43	35	28	32	22	40	23	15	17	20	23	21	2.87740019452545	2.1162220088007	2.4024607851633	2.37949756882188	1.59434372736106	2.96187250509464	1.59643756187943	1.03331042142239	1.32701855877421	1.36119463678021	1.54024025419236
ENSMUSG00000084349	531.383778503902	1034.22290193047	623.365451391734	732.648426095317	792.97410396432	904.622003528545	633.315087022706	530.600413991661	594.856975308239	584.42498857149	539.011466225991	535.671548104587	769.869444235714	569.646746537446	0.43502144136028	0.00487061886811109	0.11388566383609	Rpl3-ps1	X	13068810	13070019	+	1210	processed_pseudogene	ribosomal protein L3, pseudogene 1 [Source:MGI Symbol;Acc:MGI:3644217]	-	574	1172	522	707	796	880	655	555	557	617	576	504	15.5544412591241	28.6966700168611	18.1375861755924	21.2894974888162	23.3605494898539	26.387591409025	18.4109462984263	15.4825768102379	17.607349307061	17.0053708486678	15.6204602710475
ENSMUSG00000021730	0.925755711679272	307.972519431513	39.4081607201671	0	0	1.02797954946426	2.90067978789026	0	1.0679658443595	0	0	0	58.222402568804	0.661440938708292	6.46136385128272	0.00488201713493453	0.113915374153673	Hcn1	13	117738856	118123954	+	18120	protein_coding	hyperpolarization activated cyclic nucleotide gated potassium channel 1 [Source:MGI Symbol;Acc:MGI:1096392]	-	1	349	33	0	0	1	3	0	1	0	0	0	0.00180954630026884	0.570632490894052	0.0765684935668768	0	0	0.0020023696571418	0.0056309703809453	0	0.00211089174717363	0	0
ENSMUSG00000020590	1262.73079073053	1004.2198484615	1443.7717063843	1455.970351717	1177.50677246963	1163.67284999354	986.231127882687	1056.42064407349	945.149772258154	1054.23826949768	1000.35287742289	1077.72013844851	1251.31205329275	1020.01880493057	0.294115861309849	0.00488660820712182	0.113915374153673	Snx13	12	35097185	35197478	+	7866	protein_coding	sorting nexin 13 [Source:MGI Symbol;Acc:MGI:2661416]	-	1364	1138	1209	1405	1182	1132	1020	1105	885	1113	1069	1014	5.68575734841451	4.28625083196196	6.4619964482701	6.50809298426544	5.33603772284043	5.22149580830758	4.41028252261986	4.74180801490933	4.30341752301369	4.71875615980691	4.4594415566638
ENSMUSG00000066036	3795.59841788501	3865.98168375203	4115.16732853623	4468.43000470015	4049.54740278261	3611.29215726793	3124.0321315578	3153.00930692702	3070.40180253355	3433.61520838193	3397.83096157391	3965.45743249646	3984.33616582066	3357.39114057845	0.246971617265846	0.00490519951841683	0.11400538039876	Ubr4	4	139079920	139216899	+	17997	protein_coding	ubiquitin protein ligase E3 component n-recognin 4 [Source:MGI Symbol;Acc:MGI:1916366]	-	4100	4381	3446	4312	4065	3513	3231	3298	2875	3625	3631	3731	7.46984573759919	7.21211094558995	8.05025268929672	8.72991474831287	8.02076495917031	7.08240050299323	6.10600313480241	6.18566171112596	6.11029091343057	6.71729169745193	6.62037889855196
ENSMUSG00000025666	522.126221387109	812.729771909524	679.49222575076	552.336083605098	619.635543550009	567.444711304269	443.804007547209	451.249361088403	416.506679300203	527.592736846548	442.625735286274	588.813566765756	625.627426251128	478.432014472399	0.387360370294592	0.00491973842957303	0.114094169193192	Tmem47	X	80114304	80141478	+	4025	protein_coding	transmembrane protein 47 [Source:MGI Symbol;Acc:MGI:2177570]	-	564	921	569	533	622	552	459	472	390	557	473	554	4.5945302196103	6.77927120036677	5.94347907286052	4.82494860286654	5.48756726397635	4.975945808559	3.87852845846398	3.95832768971544	3.70614901836685	4.61504164244003	3.85613268932394
ENSMUSG00000039704	685.98498235434	952.155726265338	611.423584506835	903.634268111904	770.061535633693	717.52972552605	606.242075669063	586.050547345744	547.866478156421	602.421868284389	652.241305485271	663.212392891394	773.464970399693	609.672444638714	0.344039641349291	0.00494030434131897	0.114094169193192	Lmbrd2	15	9140637	9202569	+	8588	protein_coding	LMBR1 domain containing 2 [Source:MGI Symbol;Acc:MGI:2444173]	-	741	1079	512	872	773	698	627	613	513	636	697	624	2.82913756520793	3.72236255996081	2.50652638973722	3.69960890634538	3.19626526237747	2.94893931704841	2.483108443208	2.40937316629904	2.28480681059121	2.46974089780033	2.66316120579939
ENSMUSG00000033253	625.810861095188	874.500764345644	649.637558538512	908.815657263922	755.118556287631	601.368036436589	520.188575294986	524.864193299859	537.186819712826	616.629931215624	549.305087976835	663.212392891394	735.875238994581	568.564500065254	0.372706846002872	0.00494705826295399	0.114094169193192	Szt2	4	118219940	118266470	-	11947	protein_coding	SZT2 subunit of KICSTOR complex [Source:MGI Symbol;Acc:MGI:3033336]	-	676	991	544	877	758	585	538	549	503	651	587	624	1.85530675295464	2.45755956726383	1.91440752278854	2.67468164144196	2.25302338059934	1.7766400635837	1.53159377854603	1.55113326339576	1.61039820078425	1.81722389380815	1.61226323622576
ENSMUSG00000032238	985.929832938425	813.612214658611	1363.76119825548	1362.70534698068	982.251842347763	988.916326584614	715.501014346263	667.313673812936	835.149290289126	849.642163287888	789.801523428362	983.127345231633	1082.8627936276	806.755835066034	0.424246249865704	0.00495573346743514	0.114094169193192	Rora	9	68561068	69295528	+	13071	protein_coding	RAR-related orphan receptor alpha [Source:MGI Symbol;Acc:MGI:104661]	THR-like	1065	922	1142	1315	986	962	740	698	782	897	844	925	2.67158309183138	2.08983197074435	3.6732597958449	3.66562729150022	2.67869617138991	2.67035318921948	1.92549806553998	1.80252890793811	2.28834812292638	2.2886002551603	2.11880185982176
ENSMUSG00000034157	1068.32209127788	1277.7771006786	1144.03084757333	931.613769532801	924.472322209659	1070.12671099229	876.972189205487	823.147669273549	956.897396546108	835.434100356652	852.499037728955	937.425209183027	1069.39047371076	880.39593371563	0.281112229184679	0.00496061605187791	0.114094169193192	Cipc	12	86993817	87012136	+	4863	protein_coding	CLOCK interacting protein, circadian [Source:MGI Symbol;Acc:MGI:1919185]	-	1154	1448	958	899	928	1041	907	861	896	882	911	882	7.78089280708319	8.82172579938471	8.28238845635673	6.73576286526916	6.77640046086052	7.76692137633008	6.34341608441806	5.9763292027403	7.04738333931161	6.04854100476734	6.14710768150747
ENSMUSG00000033499	2224.59097516529	1826.65649061098	2362.10126983304	2349.24184152487	2046.19197178733	2131.0016060394	1759.74573798675	1599.44953623072	1831.56142307653	1880.20032790018	1738.68629209703	2032.15079360312	2156.63069249349	1806.96568514906	0.255026330581304	0.00498714275024578	0.114364418712673	Larp4b	13	9143917	9224487	+	8464	protein_coding	La ribonucleoprotein domain family, member 4B [Source:MGI Symbol;Acc:MGI:106330]	-	2403	2070	1978	2267	2054	2073	1820	1673	1715	1985	1858	1912	9.30906385195816	7.24576013882849	9.82528120019232	9.75904302182186	8.61747716446027	8.88640487505903	7.31334253351318	6.67199814248134	7.75019491455791	7.82115999210935	7.20322148137283
ENSMUSG00000118364	15.7378470985476	15.0015267344863	8.35930681942938	13.4716117952463	16.9353765922028	20.5595909892851	4.83446631315042	4.78018390983478	1.0679658443595	10.4192461495728	1.87156759106247	9.56556335901048	15.0108766715329	5.42316552783174	1.47222156924155	0.00499407150499004	1	ENSMUSG00000118364	19	5041385	5043141	-	1757	TEC	TEC	-	17	17	7	13	17	20	5	5	1	11	2	9	0.317252499905984	0.286659554976988	0.167502245977521	0.269589490491523	0.343583671778281	0.413010110272162	0.0967873110441367	0.0960580737046045	0.0217696974722744	0.208788818788996	0.037352093467336
ENSMUSG00000087366	56.4710984124356	348.564885889535	115.836108783521	30.0520570817032	34.8669518074764	25.6994887366064	47.3777698688742	34.4173241508104	27.7671119533469	34.0993510349654	40.2387032078431	24.4453285841379	101.91509845188	34.7242647999963	1.55400684431476	0.00499911641284307	0.114469412654435	Junos	4	94939771	95055555	+	5595	lncRNA	jun proto-oncogene, opposite strand [Source:MGI Symbol;Acc:MGI:2652837]	-	61	395	97	29	35	25	49	36	26	36	43	23	0.357484846579652	2.09163676651794	0.728896726150976	0.18885534211885	0.222138231572364	0.162122154546065	0.297862733502158	0.217189107344545	0.177745008030105	0.214579744350339	0.252188383695327
ENSMUSG00000047126	8636.37503425593	7446.05191679974	8327.06377884015	9193.85691134039	9123.18699008196	7317.15843308657	6098.19580740795	6878.68464625225	6939.642056648	7486.70196056573	6777.88203103274	7766.17460714329	8340.61551073412	6991.21351817499	0.254615397170204	0.0050437395822349	0.11461584879241	Cltc	11	86585177	86648391	-	8499	protein_coding	clathrin, heavy polypeptide (Hc) [Source:MGI Symbol;Acc:MGI:2388633]	-	9329	8438	6973	8872	9158	7118	6307	7195	6498	7904	7243	7307	35.9911030387068	29.4144650363154	34.4942091377239	38.0351445426961	38.2638060575821	30.3873342767361	25.2391766517752	28.575813281921	29.2439500253197	31.014545125687	27.9645200148687
ENSMUSG00000050967	50.91656414236	22.0610687271858	57.3209610475157	12.4353339648427	20.9201710844858	21.5875705387494	11.602719151561	9.56036781966956	19.2233851984709	15.1552671266513	14.9725407284998	9.56556335901048	30.8736115841899	13.3466405639772	1.20696721492277	0.00505175174057282	0.11461584879241	Creg2	1	39657574	39690642	-	6091	protein_coding	cellular repressor of E1A-stimulated genes 2 [Source:MGI Symbol;Acc:MGI:1928333]	-	55	25	48	12	21	21	12	10	18	16	16	9	0.296075167106867	0.121601987043219	0.331319497543454	0.0717833981728814	0.122429493250439	0.125093039227647	0.0670058665590077	0.0554175128875357	0.113033730464316	0.0876027413590285	0.0861961953335865
ENSMUSG00000066043	839.6604304931	758.90076421519	708.152706274517	806.22415205397	789.985508095108	855.278985154261	601.407609355913	718.939660039151	641.847472460057	659.254120009331	733.654495696488	685.532040729085	793.033757714358	673.439233048337	0.236125281347505	0.00506130628511559	0.11461584879241	Phactr4	4	132083234	132149800	-	4960	protein_coding	phosphatase and actin regulator 4 [Source:MGI Symbol;Acc:MGI:2140327]	-	907	860	593	778	793	832	622	752	601	696	784	645	5.99588788659482	5.13695826329848	5.0265195157323	5.71517176906676	5.67736567211042	6.0861702765977	4.26509677515439	5.11766430222744	4.63465008744566	4.67965543273713	5.18669964981187
ENSMUSG00000026113	543.418602755733	814.494657407698	710.541079651497	607.258808616486	636.570920142212	588.004302293554	489.247990890823	519.127972608057	541.458683090264	549.378433341109	527.782060679617	521.854623252683	650.048061811197	524.808293977092	0.30890518239479	0.00512325655428697	0.115063242602637	Inpp4a	1	37338946	37449817	+	10387	protein_coding	inositol polyphosphate-4-phosphatase, type I [Source:MGI Symbol;Acc:MGI:1931123]	-	587	923	595	586	639	572	506	543	507	580	564	491	1.85300189179084	2.63269671683091	2.40835880673081	2.05560114780349	2.18457059293533	1.99805917427536	1.65683998431311	1.76459615434585	1.86698996231872	1.86219079509452	1.78174556259121
ENSMUSG00000030789	1709.87079947162	541.819847939682	1196.57506186689	901.561712451097	1173.52197797735	1154.42103404836	369.353226324692	467.501986381842	981.460610966376	825.014854207079	204.93665122134	692.971923341648	1112.96173895917	590.20654207383	0.915330155178721	0.00513129043903354	0.115063242602637	Itgax	7	127728719	127749829	+	4803	protein_coding	integrin alpha X [Source:MGI Symbol;Acc:MGI:96609]	-	1847	614	1002	870	1178	1123	382	489	919	871	219	652	12.6090452093961	3.78743376798893	8.77100767600219	6.59991030078055	8.70939645966871	8.48339362574657	2.70502297325577	3.43662308386451	7.31858430639693	6.04772287144936	1.49619514685009
ENSMUSG00000005667	373.079551806747	147.367939097601	309.294352318887	341.971684033175	379.551675389957	320.729619432848	195.312439051277	202.679797776995	249.904007580122	253.850724371409	135.688650352029	159.426055983508	311.999137013202	199.476945852557	0.644981348580933	0.00513655279013001	0.115063242602637	Mthfd2	6	83282673	83302890	-	3487	protein_coding	methylenetetrahydrofolate dehydrogenase (NAD+ dependent), methenyltetrahydrofolate cyclohydrolase [Source:MGI Symbol;Acc:MGI:1338850]	-	403	167	259	330	381	312	202	212	234	268	145	150	3.7894919762636	1.41890652611874	3.12278563485881	3.44820724188502	3.87997015487443	3.24642291782958	1.97024214005843	2.0521993418862	2.56677656419729	2.56312130344103	1.36449757559591
ENSMUSG00000027598	1638.58760967231	1755.1786279349	1474.82056028504	1605.19435929511	1651.69731705131	1438.14338970049	1237.62337616651	1309.77039129473	1340.29713467117	1298.61695191493	1380.28109840857	1561.31250826516	1593.93697732319	1354.65024345351	0.235379154622206	0.00516143691103483	0.115427380439841	Itch	2	154975429	155068775	+	9709	protein_coding	itchy, E3 ubiquitin protein ligase [Source:MGI Symbol;Acc:MGI:1202301]	-	1770	1989	1235	1549	1658	1399	1280	1370	1255	1371	1475	1469	5.97759735922776	6.06945288464974	5.34794352861694	5.81310655613186	6.06408641926739	5.22812138471374	4.48389723031871	4.76301222852233	4.94416982858961	4.70922311794509	4.98510411101099
ENSMUSG00000054003	5.55453427007563	5.29465649452458	17.9128003273487	6.21766698242136	3.98479449228301	2.05595909892851	0	0	1.0679658443595	0.947204195415705	3.74313518212494	0	6.83673527759696	0.959717536983357	2.79971679118482	0.00521950135997828	1	Tdrd9	12	111937993	112035288	+	5415	protein_coding	tudor domain containing 9 [Source:MGI Symbol;Acc:MGI:1921941]	-	6	6	15	6	4	2	0	0	1	1	4	0	0.0363312786270043	0.0328278206351355	0.116462780444205	0.0403723617978782	0.0262311231900251	0.0134009005308991	0	0	0.0070635934365256	0.00615868302883013	0.0242391978659684
ENSMUSG00000022357	1.85151142335854	16.7664122326612	149.273336061239	15.5441674560534	2.98859586921226	3.08393864839277	9.66893262630085	2.86811034590087	5.33982922179748	7.57763356332564	1.87156759106247	5.31420186611694	31.5846602818195	5.44004586908404	2.53246820674119	0.00523507439650426	0.115554882489886	Klhl38	15	58177969	58187565	-	2212	protein_coding	kelch-like 38 [Source:MGI Symbol;Acc:MGI:3045310]	-	2	19	125	15	3	3	10	3	5	8	2	5	0.0296464547566649	0.254482393463376	2.37585125115042	0.247079949294202	0.0481605556308722	0.0492083248473003	0.153757057418217	0.0457795756326375	0.0864587668598239	0.120612183005841	0.0296689096844979
ENSMUSG00000031936	91.6498154562479	82.9496184142185	139.71984255332	113.990561344392	52.7985270227499	96.63007764964	70.5832081719962	82.2191632491583	53.3982922179748	50.2018223570324	54.2754601408116	40.3879341824887	96.2897404067613	58.5109800532437	0.713943499693323	0.00523641686032315	0.115554882489886	Hephl1	9	14963137	15023404	-	5261	protein_coding	hephaestin-like 1 [Source:MGI Symbol;Acc:MGI:2685355]	-	99	94	117	110	53	94	73	86	50	53	58	38	0.617013669858632	0.529357187527414	0.935000657217614	0.761825929953308	0.357736228850088	0.648279070446015	0.471926907501692	0.551779777719565	0.363517947717032	0.335964880414199	0.361756551690016
ENSMUSG00000034674	620.256326825112	562.998473917781	576.792170540627	526.429137845009	513.042290881438	504.737958786949	408.995850092526	452.20539787037	431.458201121236	435.713929891224	498.772763018148	515.477581013343	550.709393132819	457.103953834475	0.269177686180856	0.00524273435113549	0.115554882489886	Tdg	10	82465662	82486633	+	5374	protein_coding	thymine DNA glycosylase [Source:MGI Symbol;Acc:MGI:108247]	-	670	638	483	508	515	491	423	473	404	460	533	485	4.0879449020811	3.51732321968885	3.77871227885985	3.4442718112157	3.40302330750385	3.3150209620428	2.67708947630904	2.97097576445933	2.87546349411046	2.85460803061276	3.25451487182586
ENSMUSG00000026956	816.516537701118	937.154199530851	652.025931915492	592.750918990836	751.133761795348	675.382563998016	523.089255082876	508.611568006421	702.721525588548	628.943585756028	528.717844475148	462.335562352173	737.493985655277	559.069890210199	0.400534073619628	0.00525554863188058	0.115554882489886	Uap1l1	2	25249901	25255694	-	4071	protein_coding	UDP-N-acteylglucosamine pyrophosphorylase 1-like 1 [Source:MGI Symbol;Acc:MGI:2443318]	-	882	1062	546	572	754	657	541	532	658	664	565	435	7.10387606079306	7.72881081475039	5.63878968367364	5.11948522007336	6.57696605157119	5.85553681874919	4.51977009471681	4.41109245322833	6.18228392677014	5.4394287278655	4.5541156896944
ENSMUSG00000027412	570.265518394432	910.680917058228	447.820008183717	575.134195873976	560.859824788834	745.285173361585	390.624878102554	434.996735794965	562.817999977454	391.195332706686	389.286058940994	530.35734623847	635.007606276795	449.879725293521	0.498623255968786	0.00526550395289583	0.11560955416578	Lpin3	2	160722590	160747922	+	3694	protein_coding	lipin 3 [Source:MGI Symbol;Acc:MGI:1891342]	-	616	1032	375	555	563	725	404	455	527	413	416	499	5.46778858686973	8.27698310318152	4.26804247499572	5.47428569843928	5.41211305885585	7.12104228096151	3.71967208575189	4.15767115062482	5.45679802592861	3.72854573152695	3.69532936388705
ENSMUSG00000002870	373.079551806747	310.619847678776	331.983899400195	278.758736378558	401.468045097514	369.044658257668	241.723315657521	238.053158709772	233.88451991473	319.207813855093	212.42292158559	315.663590847346	344.159123103243	260.159220095009	0.404216475169176	0.00527300422980524	0.115610244296254	Mcm2	6	88860456	88875762	-	6956	protein_coding	minichromosome maintenance complex component 2 [Source:MGI Symbol;Acc:MGI:105380]	-	403	352	278	269	403	359	250	249	219	337	227	297	1.89964901110281	1.49924411434299	1.68027195512068	1.40904243884062	2.05731517487839	1.8725668213456	1.22236418562786	1.20830174925959	1.20422793307564	1.61568480715581	1.07083608441768
ENSMUSG00000028977	351.787170438123	1074.81526838849	764.279480633543	372.023741114878	376.563079520745	368.016678708203	328.743709294229	263.86615182288	249.904007580122	348.57114391298	354.662058506338	381.559693987196	551.247569800664	321.217794183957	0.779216352990211	0.00530494881617278	0.115982065996523	Casz1	4	148888886	149039346	+	12524	protein_coding	castor zinc finger 1 [Source:MGI Symbol;Acc:MGI:1196251]	-	380	1218	640	359	378	358	340	276	234	368	379	359	0.994874800792967	2.88133325567467	2.14847978232426	1.04443822194251	1.07177617222865	1.0371520178132	0.923328072046413	0.743877895204747	0.714655851114336	0.979921019259851	0.993008267972671
ENSMUSG00000045075	10.183312828472	7.05954199269945	14.3302402618789	11.3990561344392	11.954383476849	11.3077750441068	1.93378652526017	4.78018390983478	7.47576091051647	2.84161258624712	4.67891897765618	3.18852111967016	11.0390516230742	4.14979733819748	1.41117002631818	0.00532064316503748	1	Gm9796	11	95587720	95589969	-	2250	lncRNA	predicted gene 9796 [Source:MGI Symbol;Acc:MGI:3648412]	-	11	8	12	11	12	11	2	5	7	3	5	3	0.160301674919816	0.105340828882524	0.224229673281908	0.178131831888194	0.189388709431981	0.177383253360668	0.0302320543119197	0.0750106824439956	0.118998004094001	0.0444656914681535	0.0729195869134549
ENSMUSG00000061778	959.082917299726	907.151146061879	832.348121877468	939.903992176029	1026.08458176288	856.306964703725	648.785379224787	813.58730145388	809.518110024498	707.561533975532	756.113306789238	858.775021564497	920.146287313617	765.723442172072	0.265909083662684	0.00532327297122017	0.116218536419629	Mospd2	X	163719165	163763371	-	7914	protein_coding	motile sperm domain containing 2 [Source:MGI Symbol;Acc:MGI:1924013]	-	1036	1028	697	907	1030	833	671	851	758	747	808	808	4.29231516343982	3.84845427731358	3.70280710475479	4.17582805989192	4.62164449191955	3.81901535381754	2.8836772806053	3.62968673767098	3.66350944045487	3.14782709692103	3.35020998252871
ENSMUSG00000041058	2489.35710870556	1680.17099426247	3303.12038036309	2596.91224299132	2467.58398934626	2107.35807640172	1706.5666085421	1767.7120098569	1963.98918777711	1988.18160617757	1494.44672146338	2032.15079360312	2440.75046534507	1825.5078212367	0.418809109514437	0.0053453396581493	0.116372028928963	Wwp1	4	19608303	19708993	-	6453	protein_coding	WW domain containing E3 ubiquitin protein ligase 1 [Source:MGI Symbol;Acc:MGI:1861728]	-	2689	1904	2766	2506	2477	2050	1765	1849	1839	2099	1597	1912	13.66334486685	8.7416726896934	18.0212481490516	14.1498152247944	13.6307482933234	11.5264254275824	9.30257598684418	9.67187948667698	10.9004447862556	10.8476855406386	8.12082149935756
ENSMUSG00000025044	375.856818941784	92.6564886541802	317.653659138316	217.618344384748	395.490853359089	218.959644035886	95.7224330003784	137.669296603242	224.272827315494	190.388043278557	131.009731374373	80.7758683649774	269.705968085667	143.30636665617	0.912012133909749	0.00536882797854894	0.116719225112302	Msr1	8	40034726	40095714	-	6344	protein_coding	macrophage scavenger receptor 1 [Source:MGI Symbol;Acc:MGI:98257]	-	406	105	266	210	397	213	99	144	210	201	140	76	2.09841195745804	0.490360396112395	1.76283968394312	1.2061115809809	2.22219767628359	1.21820079349278	0.530752687419618	0.766187298608278	1.26613576234948	1.0566208998777	0.724138394632355
ENSMUSG00000026683	118.496731094947	45.8870229525464	84.7872548827837	74.6120037890563	147.437396214472	52.426957022677	29.9736911415326	30.5931770229426	65.1459165059292	70.0931104607622	34.6240004346557	41.4507745557121	87.274560992747	45.3134450202557	0.946644125957659	0.00540603672259479	0.116926373696547	Nuf2	1	169325503	169359033	-	6341	protein_coding	NUF2, NDC80 kinetochore complex component [Source:MGI Symbol;Acc:MGI:1914227]	-	128	52	71	72	148	51	31	32	61	74	37	39	0.661881297428093	0.242960041382575	0.470755011128435	0.413719613566649	0.828818275782601	0.291819878182917	0.166273914860148	0.17034439791729	0.367956294903951	0.389188752007967	0.191469976677026
ENSMUSG00000028382	2825.40643204514	2838.81832381426	2565.11300687633	3034.22148742162	3226.68734012617	2373.60477971297	1936.68720504806	2221.82948129121	2195.73777600312	2359.48565078052	2218.74337920456	2770.82485299337	2810.64189499942	2283.88472422014	0.299621744080456	0.00544295992107687	0.116926373696547	Ptbp3	4	59471868	59549364	-	7480	protein_coding	polypyrimidine tract binding protein 3 [Source:MGI Symbol;Acc:MGI:1923334]	-	3052	3217	2148	2928	3239	2309	2003	2324	2056	2491	2371	2607	13.3786047845694	12.7420329989794	12.0733289992364	14.2626702537606	15.3767554273944	11.2001743682792	9.10750740442808	10.4874561096164	10.5134600255701	11.1060197975104	10.4012771734373
ENSMUSG00000048478	34.2529613321331	45.8870229525464	35.8256006546973	45.5962245377566	32.8745545613349	33.9233251323204	16.4371854647114	21.032809203273	12.8155901323139	32.204942644134	16.8441083195622	30.8223708234782	38.0599481951315	21.6928344312455	0.81210511029536	0.00545291208882928	0.116926373696547	Spata33	8	123939571	123948785	+	4303	protein_coding	spermatogenesis associated 33 [Source:MGI Symbol;Acc:MGI:2444920]	-	37	52	30	44	33	33	17	22	12	34	18	29	0.281941022903147	0.358031518105255	0.293119198747556	0.372574131302287	0.272331545342873	0.278256323538115	0.134368589057742	0.172578609387766	0.106667976180672	0.263508048440138	0.137264386241921
ENSMUSG00000022139	4889.84166908991	4842.84580699182	5898.08805445167	5156.51848408812	4522.74174874122	4789.35672095397	3992.30228139962	4321.28625449064	4039.04682336761	4309.77908914146	4092.18253785809	4815.72973107517	5016.56541405278	4261.72111955543	0.235121256042112	0.00547234833167112	0.116926373696547	Mbnl2	14	120513081	120669109	+	11993	protein_coding	muscleblind like splicing factor 2 [Source:MGI Symbol;Acc:MGI:2145597]	-	5282	5488	4939	4976	4540	4659	4129	4520	3782	4550	4373	4531	14.4410395123257	13.5573725823543	17.3143243403341	15.1176367261222	13.4426030938025	14.0950728771067	11.7094697978534	12.7217316844065	12.0619589503151	12.6523115263132	11.9648802724625
ENSMUSG00000036402	2203.29859379667	2092.2717580863	2378.8198834719	2217.63455706362	2040.2147800489	2072.40677171994	1797.45457522933	1812.64573860935	1927.67834906889	2137.83986905325	1668.50250743219	1817.45703821199	2167.44105736456	1860.26301293417	0.220250655655532	0.00548250970128714	0.116926373696547	Gng12	6	66873381	66998334	+	4727	protein_coding	guanine nucleotide binding protein (G protein), gamma 12 [Source:MGI Symbol;Acc:MGI:1336171]	-	2380	2371	1992	2140	2048	2016	1859	1896	1805	2257	1783	1710	16.5089422311982	14.8605613201038	17.7173223970368	16.4952741608487	15.385078151445	15.4741703799064	13.3756214484009	13.5390552699846	14.605477473685	15.923270410983	12.3772013031543
ENSMUSG00000068196	444.362741606051	676.833588550059	359.450193235463	300.520570817032	403.460442343655	324.841537630705	197.246225576537	283.942924244186	320.389753307849	338.151897763407	290.092976614683	260.39589143973	418.244845697161	281.703278157732	0.571344419818969	0.00548523238366111	0.116926373696547	Col8a1	16	57444621	57575100	-	7833	protein_coding	collagen, type VIII, alpha 1 [Source:MGI Symbol;Acc:MGI:88463]	-	480	767	301	290	405	316	204	297	300	357	310	245	2.00928251004957	2.90105858936575	1.61559583631402	1.34896672942036	1.83604048544505	1.46373145247305	0.885772560268807	1.27986438256607	1.4649313848635	1.5199398558149	1.29864450075666
ENSMUSG00000040761	1404.37141461746	1590.16183385555	1212.09948881726	1968.92787776676	1551.08125612116	1492.6263058221	976.562195256386	1022.95935670464	1027.38314227383	1338.39952812239	1180.95914996042	1470.97107654117	1536.54469616672	1169.53907480981	0.393982575472367	0.005491664427766	0.116926373696547	Spen	4	141195201	141265908	-	14089	protein_coding	spen family transcription repressor [Source:MGI Symbol;Acc:MGI:1891706]	-	1517	1802	1015	1900	1557	1452	1010	1070	962	1413	1262	1384	3.53047633498771	3.78934266718888	3.02886717981852	4.91365656845139	3.92431445523451	3.73928783079838	2.43815541996726	2.56353492772971	2.61167455726824	3.34463173634578	2.93924575258365
ENSMUSG00000089296	3.70302284671709	15.0015267344863	0	4.14511132161424	4.98099311535377	1.02797954946426	0.966893262630085	0	0	0	0.935783795531235	0	4.80977226127261	0.317112843026887	3.7768965587347	0.0055323866810228	1	Gm23205	18	38430992	38431094	+	103	snRNA	predicted gene, 23205 [Source:MGI Symbol;Acc:MGI:5452982]	-	4	17	0	4	5	1	1	0	0	0	1	0	1.27335840624743	4.88991104946182	0	1.41499248631398	1.72380500089789	0.352261535800091	0.330204476707861	0	0	0	0.318580719524803
ENSMUSG00000005034	1882.06136184396	2154.04275052242	1999.06851653211	1910.89631926416	1912.70135629585	1785.60047741941	1682.39427697635	1614.74612474219	1591.26910809565	1858.41463140561	1759.27353559872	1597.44908095475	1940.72846364632	1683.92445962888	0.204649994597772	0.00553501181430638	0.117525991596226	Prkacb	3	146435329	146518745	-	8772	protein_coding	protein kinase, cAMP dependent, catalytic, beta [Source:MGI Symbol;Acc:MGI:97594]	-	2033	2441	1674	1844	1920	1737	1740	1689	1490	1962	1880	1503	7.59917854850108	8.24438793077464	8.02326592582752	7.65938078290547	7.77245045548486	7.18461737705542	6.74638010893556	6.49930109342896	6.49698405193699	7.45910453663793	7.03260037947821
ENSMUSG00000028653	442.511230182692	502.992366979835	429.907207856368	501.558469915323	377.559278143816	472.870592753558	279.432152900095	277.250666770417	325.729582529646	383.617699143361	354.662058506338	453.832839366386	454.566524305265	345.754166536041	0.39557274804438	0.00555513318496804	0.117630515143804	Trit1	4	122910390	122948742	+	2087	protein_coding	tRNA isopentenyltransferase 1 [Source:MGI Symbol;Acc:MGI:1914216]	-	478	570	360	484	379	460	289	290	305	405	379	427	7.5098859335393	8.09173532833234	7.2522774060991	8.44995273451421	6.44869916818886	7.99719768385641	4.70972527942639	4.69041401961736	5.5898679108432	6.47170761066202	5.95900122093423
ENSMUSG00000035455	108.313418266475	31.7679389671475	87.1756282597635	58.0315585025994	105.5970540455	42.1471615280345	35.7750507173131	46.8458023163809	32.0389753307849	50.2018223570324	31.816649048062	35.0737323163718	72.1721265949199	38.6253386809908	0.899661762847503	0.0055714867523011	0.117704507874595	Fignl1	11	11737431	11758962	-	4839	protein_coding	fidgetin-like 1 [Source:MGI Symbol;Acc:MGI:1890648]	-	117	36	73	56	106	41	37	49	30	53	34	33	0.792789943877237	0.2204124596891	0.634251633198207	0.421661327808382	0.777867451944745	0.307418984435583	0.260055643879656	0.341803171706985	0.237131794536802	0.365263739586506	0.230557900346324
ENSMUSG00000109270	19.4408699452647	22.0610687271858	15.5244269503688	5.1813891520178	11.954383476849	19.5316114398209	2.90067978789026	6.6922574737687	2.13593168871899	10.4192461495728	6.55048656871864	6.37704223934032	15.6156249485845	5.84594065133494	1.41433939463926	0.0055913009402565	1	Gm10584	7	131917393	131920020	+	2628	lncRNA	predicted gene 10584 [Source:MGI Symbol;Acc:MGI:3641800]	-	21	25	13	5	12	19	3	7	2	11	7	6	0.262012388956735	0.281840830700246	0.207975581668437	0.0693227863823916	0.162147867664367	0.262319568326019	0.0388254122156503	0.0899100645732824	0.0291091008057733	0.139589784860071	0.0874036144510589
ENSMUSG00000048376	1001.66768003697	474.754199009038	773.832974141463	788.607428937109	686.380851295749	665.102768503373	356.783613910501	456.029544998238	621.556121417226	507.701448742818	366.827247848244	672.777956250404	731.724316987284	496.945988861239	0.558624026382494	0.00559433284609572	0.117793061395953	F2r	13	95738311	95754995	-	3336	protein_coding	coagulation factor II (thrombin) receptor [Source:MGI Symbol;Acc:MGI:101802]	-	1082	538	648	761	689	647	369	477	582	536	392	633	10.6347947349109	4.77799285680063	8.16663828050116	8.31170234223238	7.33412886682975	7.03688879114325	3.76201485198911	4.82645173459342	6.67299958723427	5.35827577044296	3.85581988355319
ENSMUSG00000034220	3087.39529845037	1365.13893283826	3334.16923426383	2659.08891281554	1914.69375354199	2178.28866531476	1402.96212407625	1770.5801202028	1947.96970011172	1488.05779099807	1467.30899139298	1903.54710844309	2423.12913287079	1663.40430587082	0.542637097493214	0.00560846865099923	0.117793061395953	Gpc1	1	92759367	92788501	+	5159	protein_coding	glypican 1 [Source:MGI Symbol;Acc:MGI:1194891]	-	3335	1547	2792	2566	1922	2119	1451	1852	1824	1571	1568	1791	21.1962095046532	8.88411247656631	22.7532921037176	18.1226828914428	13.2294933439717	14.9028001587751	9.56581695239773	12.1174457741473	13.5233242544729	10.1553985214871	9.9732623621116
ENSMUSG00000033453	818.368049124476	367.096183620371	693.822466012638	1022.80621860831	711.285816872518	594.17217959034	379.989052213623	362.337940365476	603.400702063115	483.07413966201	278.863571068308	557.991195942278	701.25848563811	444.276100219135	0.658740363769065	0.00565956981798308	0.118544629516319	Adamts15	9	30810451	30833748	-	10363	protein_coding	a disintegrin-like and metallopeptidase (reprolysin type) with thrombospondin type 1 motif, 15 [Source:MGI Symbol;Acc:MGI:2449569]	-	884	416	581	987	714	578	393	379	565	510	298	525	2.79701412731934	1.1893155436896	2.35713789763079	3.47026804861444	2.44662872481004	2.02369374431368	1.28981443719555	1.23449501986138	2.0853891275899	1.64123583774667	0.943599016220621
ENSMUSG00000042404	1142.38254821222	675.951145800972	1701.71603109812	966.847215766522	1348.8529356378	802.852028131584	818.958593447682	662.533489903101	856.508607176315	791.86270736753	691.544224897583	714.228730806116	1106.43365077454	755.939392266388	0.549120103543381	0.00567805346400405	0.118623669077887	Dennd4b	3	90172492	90187976	+	6031	protein_coding	DENN/MADD domain containing 4B [Source:MGI Symbol;Acc:MGI:2446201]	-	1234	766	1425	933	1354	781	847	693	802	836	739	672	6.70893716427048	3.76295221727387	9.93390247554467	5.63668392232993	7.97231945067886	4.69855326220639	4.77654928742671	3.87864057704527	5.08638459359086	4.62278039305791	4.02079400233285
ENSMUSG00000048327	149.972425292042	45.8870229525464	130.1663490454	80.8296707714777	222.152292944778	111.02179134214	43.5101968183538	45.8897655344139	73.6896432608052	111.770095059053	29.9450814569995	56.3305397808395	123.338258724731	60.1892203184109	1.03489012549815	0.0056884520322966	0.118667855805821	Ckap2l	2	129110130	129139132	-	3137	protein_coding	cytoskeleton associated protein 2-like [Source:MGI Symbol;Acc:MGI:1917716]	-	162	52	109	78	223	108	45	48	69	118	32	53	1.69327847996849	0.491109219766309	1.46085239008575	0.905965064954298	2.52432751454406	1.24914163985981	0.487885798387292	0.51649051348113	0.841315184461664	1.25445128942671	0.334728100590931
ENSMUSG00000028753	5.55453427007563	10.5893129890492	1.19418668848991	3.10883349121068	0	2.05595909892851	0	0	0	0	0	0	3.75047108962565	0	4.37640601688564	0.00570765075888574	1	Vwa5b1	4	138292671	138363195	-	7805	protein_coding	von Willebrand factor A domain containing 5B1 [Source:MGI Symbol;Acc:MGI:1922968]	-	6	12	1	3	0	2	0	0	0	0	0	0	0.0252061337303303	0.0455509670055757	0.00538668337480562	0.0140048903994561	0	0.00929735763931054	0	0	0	0	0
ENSMUSG00000029780	354.564437573161	484.461069248999	478.868862084454	348.189351015596	334.722737351773	314.561742136062	339.37953518316	248.569563311409	263.787563556795	272.794808279723	247.046922020246	345.423121297601	385.894699901674	286.166918941489	0.431542420604759	0.00573519160845592	0.119161115311798	Nt5c3	6	56859385	56900917	-	4250	protein_coding	5'-nucleotidase, cytosolic III [Source:MGI Symbol;Acc:MGI:1927186]	-	383	549	401	336	336	306	351	260	247	288	264	325	2.954865633415	3.82712526109228	3.96688671997259	2.88059176272672	2.80740910452113	2.61237154949348	2.80891351680454	2.06499996375235	2.22296271513416	2.25990337814616	2.03831692360434
ENSMUSG00000104350	24.0696485036611	239.141985002694	23.8837337697982	48.7050580289673	25.9011641998396	47.2870592753558	17.4040787273415	27.7250666770417	9.61169259923546	29.3633300578869	29.0092976614683	26.5710093305847	68.1647747967193	23.2807458422598	1.55166483138319	0.00575263468371674	0.119236454586758	Gm38244	3	106385599	106388184	+	2586	TEC	predicted gene, 38244 [Source:MGI Symbol;Acc:MGI:5611472]	-	26	271	20	47	26	46	18	29	9	31	31	25	0.329664908345961	3.10477428514689	0.325159038981886	0.662217577943347	0.357026279381635	0.645404159559486	0.236735924136262	0.37853418634731	0.133118416909928	0.399778548582587	0.393359720588823
ENSMUSG00000019790	1135.90225823047	1315.72213888936	960.126097545889	1145.08700259593	1088.84509501633	1045.45520180515	798.65383493245	710.335329001449	935.538079658918	900.791189840336	864.664227070861	1106.41682852555	1115.18963234719	886.066581504927	0.332733200245224	0.00577605500054069	0.119528817317339	Stxbp5	10	9631291	9776823	-	16513	protein_coding	syntaxin binding protein 5 (tomosyn) [Source:MGI Symbol;Acc:MGI:1926058]	-	1227	1491	804	1105	1093	1017	826	743	876	951	924	1041	2.43638812965477	2.67510556602107	2.04703102084707	2.43819066538221	2.35044199353337	2.23458778759737	1.701273933831	1.51879256798582	2.0290945321805	1.9206173584243	1.83612694474744
ENSMUSG00000024085	2522.68431432602	1989.90839919216	2356.13033639059	3290.1821115313	3377.11333220985	2458.9270823185	1812.92486743141	1652.0315592389	2019.52341168381	2481.67499198915	2067.1464043285	2021.52238987088	2665.8242626614	2009.13727075711	0.407948229242144	0.00579315172704449	0.11972255752059	Man2a1	17	64907731	65062105	+	7223	protein_coding	mannosidase 2, alpha 1 [Source:MGI Symbol;Acc:MGI:104669]	-	2725	2255	1973	3175	3390	2392	1875	1728	1891	2620	2209	1902	12.3702018092724	9.24949865953733	11.4842814287313	16.0161261884546	16.6662326502427	12.0156151383474	8.82884391031505	8.07535742329378	10.0137805407122	12.096785786366	10.0354029310979
ENSMUSG00000041488	374.005307518426	383.862595853032	386.916487070731	430.055299617477	449.28557900491	422.499594829809	301.670697940587	319.316285176963	344.952967728117	340.046306154238	289.157192819152	399.627980331994	407.770810649064	332.461905025175	0.295508173419938	0.00590395742542929	0.120481750163904	Stx3	19	11752482	11796767	-	5711	protein_coding	syntaxin 3 [Source:MGI Symbol;Acc:MGI:103077]	-	404	435	324	415	451	411	312	334	323	359	309	376	2.31951453339031	2.25666118606133	2.385213211675	2.64769102729343	2.80426943465976	2.61115174138071	1.85807232769809	1.97410358454431	2.16328887798773	2.09637321446338	1.77542786908
ENSMUSG00000021254	606.369991149923	413.865649322005	625.753824768714	674.616867592718	670.441673326617	716.501745976586	375.154585900473	399.623374862188	429.322269432517	530.434349432795	468.827681561149	562.242557435172	617.924958689427	460.934136437382	0.422472522556139	0.00591122199928638	0.120481750163904	Gpatch2l	12	86288632	86338558	+	8316	protein_coding	G patch domain containing 2 like [Source:MGI Symbol;Acc:MGI:1917623]	-	655	469	524	651	673	697	388	418	402	560	501	529	2.58258552421486	1.67088909449079	2.64917813852183	2.85231755606095	2.87379602831266	3.04103029300437	1.58685566464081	1.696670198138	1.84899496157191	2.24574199334109	1.97687841145243
ENSMUSG00000032294	11606.199357323	15922.7969645336	22953.4623394646	10362.7783040356	10109.423626922	10207.8369261801	10429.8776239907	9383.50101500568	11019.2715821013	8470.84711960265	7854.03339589366	7877.77284633175	13527.0829197431	9172.55059715429	0.560428169897858	0.00591550682373324	0.120481750163904	Pkm	9	59563651	59586658	+	5001	protein_coding	pyruvate kinase, muscle [Source:MGI Symbol;Acc:MGI:97591]	-	12537	18044	19221	10000	10148	9930	10787	9815	10318	8943	8393	7412	82.1986461172654	106.896928409358	161.589627705143	72.8575415368627	72.057461881964	72.0435065388873	73.3607910608903	66.2474368495336	78.9155929969516	59.6365745050535	55.0702543159532
ENSMUSG00000038203	86.0952811861723	773.902290949677	109.865175341072	151.29656323892	47.8175339073962	70.9305889130336	79.285247535667	85.0872735950591	18.1554193541114	17.0496755174827	50.5323249586867	66.9589435130734	206.651238922712	52.8448140790134	1.96779154424785	0.00596245579214266	0.121128699856087	Hoxa13	6	52234674	52237788	-	2400	protein_coding	homeobox A13 [Source:MGI Symbol;Acc:MGI:96173]	Homeobox	93	877	92	146	48	69	82	89	17	18	54	63	1.27057293473377	10.8262390933563	1.61165077671372	2.21652677179059	0.710207660369929	1.04313447288802	1.16204458761441	1.25174076328418	0.270932955749735	0.250119514508364	0.738310817498731
ENSMUSG00000028864	134.234578193494	133.248855112202	120.612855537481	106.736616531567	138.471608606835	113.077750441068	80.252140798297	100.38386210653	89.7091309261976	103.245257300312	90.7710281665298	105.221196949115	124.397044070441	94.9304360411637	0.392268561660376	0.0059707473344657	0.121128699856087	Hgf	5	16758493	16825150	+	7186	protein_coding	hepatocyte growth factor [Source:MGI Symbol;Acc:MGI:96079]	-	145	151	101	103	139	110	83	105	84	109	97	99	0.661620087576725	0.622556822516655	0.590919765902608	0.522253523772093	0.686883278537574	0.555402616283751	0.39283580175	0.493216635886278	0.44711189960173	0.505854477807062	0.442936260614014
ENSMUSG00000097295	5.55453427007563	0	9.55349350791929	18.6530009472641	15.9391779691321	6.16787729678553	0.966893262630085	1.91207356393391	1.0679658443595	0	2.80735138659371	3.18852111967016	9.31134733186277	1.65713419619789	2.49023892799758	0.00597527779628579	1	Hmgb1-ps8	10	22138641	22139266	-	626	processed_pseudogene	high mobility group box 1, pseudogene 8 [Source:MGI Symbol;Acc:MGI:96114]	-	6	0	8	18	16	6	1	2	1	0	3	3	0.314271363842218	0	0.537291549397544	1.04768213643216	0.907613623475948	0.347759790933636	0.0543307685318045	0.107842834184658	0.061101211595505	0	0.157254700212722
ENSMUSG00000032332	897.057284617214	2076.38778860272	2912.62133322689	691.197312879175	724.236398972438	646.599136613017	255.259821334342	323.140432304831	742.236261829849	1006.87805972689	370.570383030369	432.576031901919	1324.68320915191	521.776831688034	1.34408487827444	0.00598182021756078	0.121194496266523	Col12a1	9	79506273	79626113	-	15228	protein_coding	collagen, type XII, alpha 1 [Source:MGI Symbol;Acc:MGI:88448]	-	969	2353	2439	667	727	629	264	338	695	1063	396	407	2.08645394096955	4.57792129064307	6.73384767945447	1.59593181642791	1.69530131694556	1.4986845363725	0.589632264948788	0.749220173347237	1.74568585033204	2.32796641206891	0.853314314944685
ENSMUSG00000019852	5.55453427007563	97.9511451487048	14.3302402618789	7.25394481282492	5.97719173842452	0	8.70203936367077	2.86811034590087	1.0679658443595	1.89440839083141	3.74313518212494	0	21.8445093719848	3.04594318781458	2.83857191009969	0.00599148837676904	1	Arfgef3	10	18457587	18619697	-	14579	protein_coding	ARFGEF family member 3 [Source:MGI Symbol;Acc:MGI:106387]	-	6	111	12	7	6	0	9	3	1	2	4	0	0.0134943325169921	0.225571644260669	0.0346057181483156	0.0174945054981888	0.0146143286995664	0	0.0209959222105897	0.00694590995948927	0.00262359273330037	0.00457497340024901	0.00900303562961923
ENSMUSG00000033031	187.002653759213	104.128244392317	136.13728248785	120.208228326813	182.304348021948	91.4901799023187	56.0798092325449	78.3950161212904	113.204379502107	114.6117076453	58.0185953229366	87.1529106043177	136.878489481743	84.5770697380828	0.696064588448568	0.00600592498261021	0.121351233538665	Cip2a	16	48814548	48840072	+	5688	protein_coding	cell proliferation regulating inhibitor of protein phosphatase 2A [Source:MGI Symbol;Acc:MGI:2146335]	-	202	118	114	116	183	89	58	82	106	121	62	82	1.16444686183123	0.61462706725365	0.842635243741349	0.743070069729231	1.14247540302125	0.567718266293853	0.346807585065534	0.486619933576554	0.712804500110993	0.709434159763525	0.357675188974225
ENSMUSG00000035390	50.91656414236	97.9511451487048	60.9035211129855	63.2129476546172	90.6540746994386	67.8466502646409	42.5433035557237	47.8018390983478	51.2623605292558	58.7266601157737	40.2387032078431	42.5136149289355	71.9141505037911	47.1810802393133	0.610808791831778	0.0060178860754567	0.121351233538665	Brsk1	7	4693603	4718996	+	4100	protein_coding	BR serine/threonine kinase 1 [Source:MGI Symbol;Acc:MGI:2685946]	-	55	111	51	61	91	66	44	50	48	62	43	40	0.439852156792177	0.802099756506413	0.52297469530689	0.542097426311631	0.788157281630043	0.584066809846102	0.364996753278055	0.411643989021927	0.447797367322374	0.504306012992473	0.344144879701305
ENSMUSG00000078486	80.5407469160967	456.222901278202	1189.40994173595	34.1971684033175	36.8593490536179	46.2590797258915	125.696124141911	33.4612873688435	65.1459165059292	60.6210685066051	29.0092976614683	17.0054459715742	307.248197852179	55.1565233593886	2.47734417322326	0.00603111479566274	0.121351233538665	Perm1	4	156300325	156305764	+	3901	protein_coding	PPARGC1 and ESRR induced regulator, muscle 1 [Source:MGI Symbol;Acc:MGI:1921433]	-	87	517	996	33	37	45	130	35	61	64	31	16	0.731258951447272	3.9264842091001	10.7343992528573	0.308226061329225	0.336807016581484	0.418541968324384	1.13341141838458	0.302850102151482	0.598105835935902	0.547129759156978	0.260760891423403
ENSMUSG00000009569	1225.70056226336	1207.18168075161	1406.75191904112	1420.73690548328	1282.10762789206	1193.484256928	735.805772861495	665.401600249002	984.664508499455	1115.8065421997	754.241739198175	1355.12147585982	1289.32715872657	935.173606477941	0.463508606095891	0.00605132578640669	0.121351233538665	Mrtfb	16	13074345	13235393	+	8990	protein_coding	myocardin related transcription factor B [Source:MGI Symbol;Acc:MGI:3050795]	-	1324	1368	1178	1371	1287	1161	761	696	922	1178	806	1275	4.82898867009941	4.50832968993894	5.50909111080551	5.55659994354439	5.08363325303725	4.68570536547078	2.87902308095575	2.61327538837146	3.92279293648507	4.36990416152543	2.94192816168077
ENSMUSG00000042029	324.014499087745	171.193893322962	210.176857174224	299.484292986629	280.928011705953	205.595909892851	130.530590455061	157.746069024548	167.670637564441	222.592985922691	131.009731374373	205.128192032114	248.565577361727	169.113034395538	0.556355576409793	0.00606091687961507	0.121351233538665	Ncapg2	12	116369022	116427351	+	9939	protein_coding	non-SMC condensin II complex, subunit G2 [Source:MGI Symbol;Acc:MGI:1923294]	-	350	194	176	289	282	200	135	165	157	235	140	193	1.15465767545075	0.578293487866255	0.744499367974945	1.05946476859111	1.00753878772673	0.730112449691305	0.461967325548124	0.560372589945334	0.604200551165049	0.788517770526417	0.462212896221718
ENSMUSG00000030329	299.944850584084	236.494656755431	191.069870158386	122.28078398762	249.049655767688	168.588646112138	136.331950030842	118.548560963903	192.233851984709	140.186220921524	138.496001738623	90.3414317239879	211.238077227558	136.023002893931	0.636509581293309	0.00607756116135996	0.121351233538665	Pianp	6	124973657	124980059	+	2851	protein_coding	PILR alpha associated neural protein [Source:MGI Symbol;Acc:MGI:2441908]	-	324	268	160	118	250	164	141	124	180	148	148	85	3.72628171986051	2.78501051456339	2.3594844610513	1.50805144498949	3.11385329871067	2.08712797710808	1.68206229927333	1.46811507554365	2.41490162138951	1.73121422411962	1.70341791947951
ENSMUSG00000102861	50.91656414236	16.7664122326612	29.8546672122478	34.1971684033175	23.9087669536981	32.8953455828562	12.5696124141911	16.2526252934383	10.679658443595	25.574513276224	17.7798921150935	12.7540844786806	31.4231540878568	15.9350643368704	0.974211607470465	0.00608779185371363	0.121351233538665	Gm37637	9	98472548	98473803	+	1256	lncRNA	predicted gene, 37637 [Source:MGI Symbol;Acc:MGI:5610865]	-	55	19	25	33	24	32	13	17	10	27	19	12	1.43582312328656	0.448180775749193	0.836844421583556	0.957316771692123	0.678542350671907	0.924406068469029	0.352025313942536	0.456872389089623	0.304533108748297	0.716903067062189	0.496387315374235
ENSMUSG00000026177	1744.12376080375	544.467176186945	1311.21698396192	952.339326140872	1724.41981653547	1009.4759175739	571.43391821438	699.818924399812	1238.84037945701	641.257240296433	530.58941206621	662.14955251817	1214.34049686714	724.014904492003	0.746249876747204	0.00609127414885634	0.121351233538665	Slc11a1	1	74414354	74425221	+	3705	protein_coding	solute carrier family 11 (proton-coupled divalent metal ion transporters), member 1 [Source:MGI Symbol;Acc:MGI:1345275]	-	1884	617	1098	919	1731	982	591	732	1160	677	567	623	16.6732621760544	4.93385309366274	12.4597257724461	9.03771550452244	16.5906809730141	9.61669238867369	5.42524618370785	6.66896593712609	11.9755076416172	6.09377998460323	5.02170920403995
ENSMUSG00000003134	370.302284671709	1317.48702438753	474.092115330495	360.624684980439	468.213352843254	382.408392400703	384.823518526774	190.251319611424	347.088899416836	362.779206844215	251.725840997902	332.66903681892	562.187975769022	311.556303702679	0.852266625126362	0.00609147286385056	0.121351233538665	Tbc1d8	1	39410573	39517836	-	5239	protein_coding	TBC1 domain family, member 8 [Source:MGI Symbol;Acc:MGI:1927225]	-	400	1493	397	348	470	372	398	199	325	383	269	313	2.50345325145038	8.44307547775382	3.18593172455088	2.42026105551815	3.18569956455303	2.576303303248	2.58377597216302	1.28215434488639	2.37278898627705	2.43801677309164	1.68484748919139
ENSMUSG00000011463	2.77726713503782	6.17709924361201	9.55349350791929	0	7.96958898456603	1.02797954946426	0	0	0	0.947204195415705	0.935783795531235	0	4.5842380700999	0.31383133182449	3.69093812402777	0.00610977388038507	1	Cpb1	3	20302428	20329897	-	3284	protein_coding	carboxypeptidase B1 (tissue) [Source:MGI Symbol;Acc:MGI:1923953]	-	3	7	8	0	8	1	0	0	0	1	1	0	0.0299533912553636	0.0631515702991683	0.102419156492955	0	0.0865051961473726	0.0110483977428165	0	0	0	0.010155075700705	0.00999202622139303
ENSMUSG00000027834	26.8469156386989	96.1862596505299	35.8256006546973	25.906945760089	39.8479449228301	43.1751410774987	18.3709719899716	19.1207356393391	22.4272827315494	31.2577384487183	25.2661624793433	17.0054459715742	44.631467950724	22.241389543416	1.00782239290424	0.00611088595896375	0.121581495833933	Serpini1	3	75464854	75550802	+	7286	protein_coding	serine (or cysteine) peptidase inhibitor, clade I, member 1 [Source:MGI Symbol;Acc:MGI:1194506]	-	29	109	30	25	40	42	19	20	21	33	27	16	0.13050787673144	0.443227393004374	0.173111709059942	0.125020781370385	0.194951320441924	0.209152265148393	0.0886920341637776	0.0926566211907714	0.11024382756444	0.151046646148339	0.12159936604426
ENSMUSG00000034560	939.642047354461	878.030535341994	813.24113486163	922.287269059169	1021.10358864752	747.341132460514	743.540918962535	693.126666926043	757.187783650882	727.452822079262	715.874603581395	816.261406635561	886.940951287548	742.240700305946	0.257783905720169	0.00612683936632839	0.121742421760459	Washc4	10	83379616	83432337	+	6098	protein_coding	WASH complex subunit 4 [Source:MGI Symbol;Acc:MGI:2441787]	-	1015	995	681	890	1025	727	769	725	709	768	765	768	5.45766048627164	4.83420344089764	4.69519947641582	5.31782392671379	5.9688656270841	4.32563070879741	4.28903017162996	4.01315761681757	4.4471622084748	4.20010467131132	4.11652472859246
ENSMUSG00000007659	1340.49427051159	1861.07175782539	1267.0320764878	1441.46246209135	1125.70444406995	1486.45842852531	1003.63520661003	1127.16736593904	1107.4805806008	1088.33762053265	1076.15136486092	1315.79638205055	1420.3705732519	1119.761420099	0.343619396658744	0.0061428271118193	0.121754239810722	Bcl2l1	2	152622588	152673648	-	4586	protein_coding	BCL2-like 1 [Source:MGI Symbol;Acc:MGI:88139]	-	1448	2109	1061	1391	1130	1446	1038	1179	1037	1149	1150	1238	10.3529091878198	13.624851947634	9.72692774280847	11.0515819064361	8.74983271061949	11.4402809897501	7.69809887107375	8.67791486495025	8.64905903222006	8.35549708300944	8.22849677882968
ENSMUSG00000042500	266.61764496363	509.169466223448	267.49781822174	268.395958074522	298.859586921226	189.148237101423	233.02127629385	192.163393175358	212.52520302754	197.018472646467	193.707245674966	191.31126718021	299.948118584331	203.291142999732	0.562653721835019	0.00614316566265093	0.121754239810722	Ago4	4	126383334	126427265	-	6947	protein_coding	argonaute RISC catalytic subunit 4 [Source:MGI Symbol;Acc:MGI:1924100]	-	288	577	224	259	300	184	241	201	199	208	207	180	1.35932430412134	2.4607516031513	1.35564218768391	1.35841926577653	1.53348422420454	0.960999082551221	1.17988566652069	0.976639733274709	1.09567040928436	0.998509841518922	0.977754357418788
ENSMUSG00000003226	2159.78807534774	2273.17252164922	2315.52798898194	2568.93274157043	2223.51532669392	1954.18912353155	1762.64641777464	1875.74416621917	1788.84278930216	2022.28095721253	1813.54899573953	2155.44027689703	2249.18762962913	1903.08393385751	0.241058411476482	0.00616924834250411	0.121862163946944	Ranbp2	10	58282742	58330178	+	11728	protein_coding	RAN binding protein 2 [Source:MGI Symbol;Acc:MGI:894323]	-	2333	2576	1939	2479	2232	1901	1823	1962	1675	2135	1938	2028	6.52256888776542	6.50745485380189	6.95101471628187	7.70165280691408	6.75811518564837	5.88112768539097	5.28667840952918	5.64690753153169	5.46279633513529	6.07100003951065	5.42233729086153
ENSMUSG00000031007	1719.12835658841	1546.03969640118	1563.19037523329	1546.12652296211	1686.56426885879	1416.55581916174	1144.80162295402	1412.06632696519	1510.10370392433	1343.13554909947	1231.49147491911	1361.49851809916	1579.60083986759	1333.84953266021	0.244361555574336	0.00617664191277207	0.121862163946944	Atp6ap2	X	12454040	12483288	+	2618	protein_coding	ATPase, H+ transporting, lysosomal accessory protein 2 [Source:MGI Symbol;Acc:MGI:1917745]	-	1857	1752	1309	1492	1693	1378	1184	1477	1414	1418	1316	1281	23.2578815623904	19.8268500503681	21.0215318701789	20.7649336637498	22.9637427235731	19.0977421016998	15.3816257996474	19.0434874279609	20.6587444082214	18.0631256212304	16.4946445264125
ENSMUSG00000011884	4011.29949870629	4645.17863119624	3084.58421636944	3260.1300544496	3420.94607162497	3968.00106093203	2448.17374097937	2826.04472749432	3348.07292206702	3209.12781406841	2313.25754255321	3218.28065012042	3731.68992221309	2893.82623288046	0.367125313095056	0.00618268047322119	0.121862163946944	Gltp	5	114807459	114829045	-	1762	protein_coding	glycolipid transfer protein [Source:MGI Symbol;Acc:MGI:1929253]	-	4333	5264	2583	3146	3434	3860	2532	2956	3135	3388	2472	3028	80.6326026319272	88.5114058800094	61.632936232318	65.0555243019594	69.206955326627	79.4847567556188	48.8740106171982	56.6283823989801	68.0543352828005	64.124473337445	46.0361796155092
ENSMUSG00000064339	9442.70825912857	9167.69772026932	13403.5513916108	11916.1587718105	9266.63959180415	8122.06642031708	7882.11387696045	8439.89271120429	8173.14260688322	6575.49152457583	7050.19511553232	9181.87798427684	10219.8036924901	7883.78563657216	0.374366651156312	0.00619176300457638	0.121862163946944	mt-Rnr2	MT	1094	2675	+	1582	Mt_rRNA	mitochondrially encoded 16S rRNA [Source:MGI Symbol;Acc:MGI:102492]	-	10200	10389	11224	11499	9302	7901	8152	8828	7653	6942	7534	8639	211.408081795757	194.561331410889	298.287830228683	264.84084320683	208.797460706734	181.208277255829	175.258008909365	188.361211805953	185.033084883116	146.34046942411	156.270085659094
ENSMUSG00000023232	8.33180140511345	1779.00458216026	346.314139662074	2.07255566080712	10.9581848537783	2.05595909892851	52.2122361820246	4.78018390983478	24.5632144202684	7.57763356332564	60.8259467095303	6.37704223934032	358.122870473494	26.0560428373873	3.78053965952873	0.00619584747246234	0.121862163946944	Serinc2	4	130147288	130172998	-	2319	protein_coding	serine incorporator 2 [Source:MGI Symbol;Acc:MGI:1919132]	-	9	2016	290	2	11	2	54	5	23	8	65	6	0.127253475915413	25.7560370747697	5.2576491956463	0.0314239383549677	0.168440799139052	0.0312918828696933	0.791978136890522	0.0727787992664899	0.379359743230738	0.115047067187978	0.91974899405716
ENSMUSG00000027366	2666.1764496363	2602.32366705883	2551.97695330294	2573.07785289204	2751.50059692142	2344.82135232797	2048.84682351315	2298.31242384856	2085.73729403409	2125.52621451284	2246.8168930705	2566.75950133448	2581.64614535658	2228.66652505227	0.212305823253869	0.00626569234223807	0.122638119918907	Sppl2a	2	126732311	126775155	-	8665	protein_coding	signal peptide peptidase like 2A [Source:MGI Symbol;Acc:MGI:1913802]	-	2880	2949	2137	2483	2762	2281	2119	2404	1953	2244	2401	2415	10.8981257250213	10.0831323549158	10.3688433021517	10.4409380664257	11.3190626540204	9.55122700582583	8.31730392069562	9.36486512035943	8.62100370109743	8.63655611551095	9.09243712413645
ENSMUSG00000020573	302.722117719122	292.08854994794	398.85835395563	406.220909518196	350.661915320905	237.463275926243	190.477972738127	188.33924604749	270.195358622952	323.943834832171	185.285191515185	237.013403228815	331.335853731339	232.542501164123	0.510309774136229	0.00634550192885617	0.123712388126674	Pik3cg	12	32223472	32258658	-	8426	protein_coding	phosphatidylinositol-4,5-bisphosphate 3-kinase catalytic subunit gamma [Source:MGI Symbol;Acc:MGI:1353576]	-	327	331	334	392	352	231	197	197	253	342	198	223	1.27248945172145	1.16384675869718	1.66655391517678	1.69510255837329	1.48346247596852	0.994701960751432	0.795179092912319	0.789187870716854	1.14847943153013	1.35360192992896	0.771081793732356
ENSMUSG00000048251	32.4014499087745	52.0641221961584	19.1069870158386	56.9952806721958	24.9049655767688	56.5388752205341	29.9736911415326	8.60433103770261	12.8155901323139	24.6273090808083	24.3303786838121	14.8797652251274	40.3352800983784	19.2051775502162	1.06985779497663	0.00634908648048853	0.123712388126674	Bcl11b	12	107876662	107969861	-	8111	protein_coding	B cell leukemia/lymphoma 11B [Source:MGI Symbol;Acc:MGI:1929913]	zf-C2H2	35	59	16	55	25	55	31	9	12	26	26	14	0.141488628237024	0.215509724974649	0.0829353988220596	0.247069795184586	0.109451310006462	0.246031512798362	0.129989260772802	0.0374544771172706	0.0565888671563843	0.106901859650967	0.105185447773076
ENSMUSG00000007021	7.40604569343417	7.94198474178688	17.9128003273487	6.21766698242136	11.954383476849	5.13989774732128	1.93378652526017	2.86811034590087	6.40779506615697	1.89440839083141	0.935783795531235	3.18852111967016	9.42879649486023	2.8714008738918	1.72491920198529	0.00635659508948448	1	Syngr3	17	24904066	24908929	-	2071	protein_coding	synaptogyrin 3 [Source:MGI Symbol;Acc:MGI:1341881]	-	8	9	15	6	12	5	2	3	6	2	1	3	0.12665950347029	0.128751314876334	0.304512774555948	0.105560762499039	0.205757892912582	0.0875976296171159	0.0328450614204825	0.0488963888456755	0.11081417226109	0.0322059571232401	0.0158444297977087
ENSMUSG00000044716	8.33180140511345	72.3603054251693	244.808271140432	12.4353339648427	3.98479449228301	26.7274682860706	16.4371854647114	9.56036781966956	27.7671119533469	3.78881678166282	8.42205415978112	18.0682863447976	61.4413291189852	14.0073037539949	2.1333379591096	0.00637743308273816	0.123712388126674	Dok7	5	35214110	35245183	+	4275	protein_coding	docking protein 7 [Source:MGI Symbol;Acc:MGI:3584043]	-	9	82	205	12	4	26	17	10	26	4	9	17	0.0690294293913081	0.568286050550458	2.01610013257856	0.102276649887958	0.0332260893740318	0.220668162075472	0.135248664027009	0.0789586130989427	0.232627677176243	0.0312039940127393	0.0690817139180099
ENSMUSG00000038773	1307.16706489113	1889.30992579619	1343.46002455115	1433.17223944812	1483.33974975235	1223.29566386246	1212.48415133813	1174.01316825542	1114.95634151131	1107.28170444096	1222.13363696379	1221.20358883367	1446.62411138357	1175.34543189055	0.3000415937124	0.00637783356322024	0.123712388126674	Kdm3b	18	34910100	34971713	+	14095	protein_coding	KDM3B lysine (K)-specific demethylase 3B [Source:MGI Symbol;Acc:MGI:1923356]	-	1412	2141	1125	1383	1489	1190	1254	1228	1044	1169	1306	1149	3.28471360714795	4.50029361417469	3.35568972741416	3.57510224694821	3.7513274433871	3.06326331628359	3.02588652859459	2.94082320812713	2.83308479822438	2.76589535258628	3.04042860794874
ENSMUSG00000007617	270.320667810347	342.387786645923	469.315368576535	210.364399571923	187.285341137302	203.539950793923	192.411759263387	172.086620754052	200.777578739585	220.698577531859	147.853839693935	157.300375237061	280.535585755992	181.85479186998	0.624349481115013	0.00639009202514013	0.123795036867514	Homer1	13	93436143	93541637	+	11976	protein_coding	homer scaffolding protein 1 [Source:MGI Symbol;Acc:MGI:1347345]	-	292	388	393	203	188	198	199	180	188	233	158	148	0.799464082880297	0.959862888427306	1.37966967685042	0.617611846533464	0.557444222401247	0.599868216525306	0.565147057371495	0.507336780057084	0.600440830849348	0.648829290586158	0.43291438122467
ENSMUSG00000030978	789.669622062419	659.184733568311	767.862040699013	547.15469445308	849.757425479353	537.633304369806	478.612165001892	537.29267146543	499.808015160244	606.210685066051	555.855574545554	533.54586735814	691.87697010533	535.220829766218	0.370179831564566	0.00640963442128977	0.12401841400893	Rrm1	7	102090902	102118978	+	11012	protein_coding	ribonucleotide reductase M1 [Source:MGI Symbol;Acc:MGI:98180]	-	853	747	643	528	853	523	495	562	468	640	594	502	2.53986551522187	2.00975751616761	2.45493007492282	1.74702486777378	2.750668063456	1.72320892408419	1.52882993506632	1.72268448874741	1.62556300024627	1.93820667496492	1.77001503650259
ENSMUSG00000024064	16.6636028102269	17.6488549817486	14.3302402618789	9.32650047363204	8.96578760763678	3.08393864839277	0	5.73622069180174	3.20389753307849	5.68322517249423	1.87156759106247	4.25136149289355	11.6698207972527	3.45771208022175	1.75895371680963	0.00641241226524897	1	Galnt14	17	73800223	74017448	-	5898	protein_coding	polypeptide N-acetylgalactosaminyltransferase 14 [Source:MGI Symbol;Acc:MGI:1918935]	-	18	20	12	9	9	3	0	6	3	6	2	4	0.100068094488926	0.100464930902712	0.0855403127982865	0.0555992724149314	0.054186749265254	0.0184552076233008	0	0.0343385626651048	0.0194554213930753	0.0339260107844508	0.0111270987151762
ENSMUSG00000019577	3466.95514023887	2444.36641497218	13296.0745896467	5021.80236613565	2211.56094321707	2852.64324976331	1307.23969107587	1264.83666254228	2509.71973424481	3149.45394975722	988.187688080984	2357.37994780947	4882.23378399563	1929.46961225177	1.33929856734578	0.0064440657379875	0.124066485719809	Pdk4	6	5483351	5496309	-	3511	protein_coding	pyruvate dehydrogenase kinase, isoenzyme 4 [Source:MGI Symbol;Acc:MGI:1351481]	-	3745	2770	11134	4846	2220	2775	1352	1323	2350	3325	1056	2218	34.9742882963439	23.3742778414387	133.325967440941	50.2902677039154	22.4531615782005	28.6770588066252	13.0968255791597	12.7193420088387	25.6012510333658	31.5825457415858	9.8693784395539
ENSMUSG00000025473	2509.72373436251	487.108397496262	1331.51815766625	1008.29832898266	1523.18769467518	1144.14123855372	369.353226324692	479.930464547412	1270.8793547878	577.79455920358	184.349407719653	407.067862944557	1333.99625862276	548.229145921282	1.28308208214397	0.00644417950246956	0.124066485719809	Adam8	7	139558845	139572475	-	4638	protein_coding	a disintegrin and metallopeptidase domain 8 [Source:MGI Symbol;Acc:MGI:107825]	-	2711	552	1115	973	1529	1113	382	502	1190	610	197	383	19.1657874003713	3.52612412333157	10.1073773330097	7.64387300484589	11.7066355401641	8.70696640849216	2.80125600270537	3.65349572317779	9.81387161836039	4.38616943654166	1.3937734756097
ENSMUSG00000027861	71.2831897993039	230.317557511819	606.646837752875	20.7255566080712	35.8631504305471	94.5741185507115	48.3446631315042	50.6699494442487	37.3788045525823	72.9347230470093	32.7524328435932	38.2622534360419	176.568401775555	46.7238044091633	1.91686177706701	0.00645873977904166	0.124192339179858	Casq2	3	101993731	102053830	+	2736	protein_coding	calsequestrin 2 [Source:MGI Symbol;Acc:MGI:1309469]	-	77	261	508	20	36	92	50	53	35	77	35	36	0.922789247071307	2.8262701828062	7.80624136699626	0.266345442416557	0.467241881822322	1.22004031916728	0.62154716924177	0.653876014725619	0.489301003675992	0.938557632414425	0.419767358876796
ENSMUSG00000083087	225.884393649742	349.447328638623	328.401339334726	254.924346279276	185.29294389116	319.701639883383	132.464376980322	150.097774768812	198.641647050866	265.217174716397	190.899894288372	193.436947926656	277.275331946152	188.459635955238	0.556792528098313	0.00648875949552736	0.124280026799193	Gm11249	4	67849118	67849976	+	859	processed_pseudogene	predicted gene 11249 [Source:MGI Symbol;Acc:MGI:3650834]	-	244	396	275	246	186	311	137	157	186	280	204	182	9.31374955349547	13.6581313350304	13.4596537003474	10.4345400518695	7.68909341261972	13.1361976441028	5.4243485108552	6.1693884920469	8.28216609235648	10.8705415696301	7.79280335117015
ENSMUSG00000026596	444.362741606051	629.181680099338	536.18982313197	644.564810511014	491.125921173882	447.171104016951	412.863423143046	396.755264516287	405.827020856608	435.713929891224	429.524762148837	460.209881605727	532.099346756534	423.482380360288	0.329588819323048	0.00649181894534942	0.124280026799193	Abl2	1	156386356	156477138	+	10800	protein_coding	v-abl Abelson murine leukemia viral oncogene 2 (arg, Abelson-related gene) [Source:MGI Symbol;Acc:MGI:87860]	-	480	713	449	622	493	435	427	415	380	460	459	433	1.45728795381651	1.95593778628228	1.74790144624265	2.09844695898592	1.62098322482581	1.46139612143732	1.34469658241559	1.29705971726076	1.34581076058692	1.42043181078824	1.39458709971982
ENSMUSG00000018481	1508.05605432553	1533.68549791395	1378.09143851736	1980.3269339012	1566.02423546722	1783.54451832048	1105.15899918619	1209.3865291882	1305.0542618073	1315.66662743241	1226.81255594145	1615.51736729955	1624.95477974096	1296.26605680918	0.326320054944789	0.00649331263539561	0.124280026799193	Appbp2	11	85078088	85125956	-	6463	protein_coding	amyloid beta precursor protein (cytoplasmic tail) binding protein 2 [Source:MGI Symbol;Acc:MGI:1914134]	-	1629	1738	1154	1911	1572	1735	1143	1265	1222	1389	1311	1520	8.26446645942433	7.96718457653391	7.50699296864814	10.7735268473867	8.6372152413858	9.74019770310309	6.01495324746089	6.60681277754054	7.23204642374077	7.16728053333575	6.65618293355914
ENSMUSG00000024180	320.311476241028	686.540458790021	285.410618549089	320.2098495947	408.441435459009	280.638417003742	245.590888708042	266.734262168781	306.506197331175	284.161258624712	203.065083630278	183.871384567646	383.592042606265	248.321512505106	0.628557078992396	0.00651009110148956	0.124280026799193	Pgap6	17	26332273	26342228	+	4359	protein_coding	post-glycosylphosphatidylinositol attachment to proteins 6 [Source:MGI Symbol;Acc:MGI:1926283]	-	346	778	239	309	410	273	254	279	287	300	217	173	2.60265811435226	5.28788486346805	2.30518289377048	2.58287255459481	3.34004520247386	2.27236570891552	1.98183287901607	2.16049350329058	2.51836794624263	2.29520086724812	1.63353926636817
ENSMUSG00000030047	942.419314489499	298.265649191552	562.461930278748	473.578968494427	849.757425479353	482.122408698736	326.809922768969	336.524947252369	611.944428817991	306.894159314689	168.441083195622	297.595304502548	601.434282772052	341.368307642031	0.817570457377461	0.00651488822457483	0.124280026799193	Arhgap25	6	87435527	87510241	-	4434	protein_coding	Rho GTPase activating protein 25 [Source:MGI Symbol;Acc:MGI:2443687]	-	1018	338	471	457	853	469	338	352	573	324	180	280	7.52800644613601	2.25844892775032	4.46600880056575	3.75536261407789	6.83138401325608	3.8377758254161	2.59263388635712	2.67967796552298	4.94291438811106	2.43688836868771	1.33208988272211
ENSMUSG00000043613	537.864068485657	304.442748435164	604.258464375895	501.558469915323	625.612735288433	448.199083566415	217.550984091769	164.438326498317	462.429210607662	504.859836156571	220.844975745371	190.248426806986	503.655928344481	293.395293317779	0.779440028653733	0.00651950266560792	0.124280026799193	Mmp3	9	7445822	7455975	+	1801	protein_coding	matrix metallopeptidase 3 [Source:MGI Symbol;Acc:MGI:97010]	-	581	345	506	484	628	436	225	172	433	533	236	179	10.5776772772161	5.67537607024286	11.8122100236652	9.79181085892901	12.3822990203308	8.78365410866768	4.24902206979715	3.22366841819281	9.19598679214569	9.86960586584918	4.29986681299773
ENSMUSG00000093812	1019.25703855888	346.80000039136	577.986357229117	980.318827561768	712.282015495589	931.349471814616	366.452546536802	649.148974955563	461.361244763302	533.275962019042	376.185085803556	514.414740640119	761.332285175221	483.473092453064	0.655071150754999	0.00657186503722853	0.124485213078806	Gm5627	9	102616847	102633884	+	931	lncRNA	predicted gene 5627 [Source:MGI Symbol;Acc:MGI:3645308]	-	1101	393	484	946	715	906	379	679	432	563	402	484	38.7762253876685	12.5063947287019	21.8569740605083	37.0231036201562	27.2716690206498	35.3086380212598	13.8455340034852	24.6181675840632	17.7483596715313	20.1671731712436	14.1688005076735
ENSMUSG00000021819	3091.09832129709	3519.18168336067	2682.14330234834	2756.49902887347	2875.0292261822	2625.45976933171	2394.02771827209	2287.79601924693	2440.30195436145	2561.24014440407	2622.06619507852	2546.56553424324	2924.90188856558	2475.33292760105	0.241119105298165	0.00657236824788358	0.124485213078806	Zswim8	14	20757620	20773687	+	8590	protein_coding	zinc finger SWIM-type containing 8 [Source:MGI Symbol;Acc:MGI:1919156]	-	3339	3988	2246	2660	2886	2554	2476	2393	2285	2704	2802	2396	12.7453318684924	13.7547039808336	10.9928662585383	11.2828766414524	11.9304965531293	10.7877327276651	9.80342110429014	9.40340551685875	10.1745965166852	10.4978372872428	10.7036446029308
ENSMUSG00000020493	98.1301054380028	45.004580203459	95.5349350791929	66.3217811458279	159.391779691321	77.0984662098192	44.4770900809839	47.8018390983478	50.1943946848963	71.9875188515936	30.8808652525308	59.5190609005097	90.2469412946037	50.8101281448103	0.82846084586788	0.0065810041175696	0.124485213078806	Prr11	11	86979979	86999534	-	3824	protein_coding	proline rich 11 [Source:MGI Symbol;Acc:MGI:2444496]	-	106	51	80	64	160	75	46	50	47	76	33	56	0.908899521404907	0.395131410639043	0.879562002936356	0.60980847736544	1.48579008445592	0.711616203989462	0.409128873075796	0.441354695342547	0.47011502289826	0.662799271361075	0.283173605037867
ENSMUSG00000024112	87.9467926095308	771.254962702414	115.836108783521	75.6482816194599	84.6768829610141	164.476727914281	80.252140798297	59.2742804819513	57.6701555954128	106.086869886559	109.486704077154	91.4042720972113	216.639959431704	84.029070489431	1.36722036092804	0.00658656176184136	0.124485213078806	Cacna1h	17	25593259	25652757	-	9763	protein_coding	calcium channel, voltage-dependent, T type, alpha 1H subunit [Source:MGI Symbol;Acc:MGI:1928842]	-	95	874	97	73	85	160	83	62	54	112	117	86	0.319056949839474	2.65226800160662	0.4177176260181	0.27244004160081	0.309165477473338	0.594619492982229	0.289144532559203	0.214360139320647	0.21156052000148	0.382578928948571	0.393241447402786
ENSMUSG00000059430	518.423198540392	22962.9252167531	450.208381560697	211.400677402326	944.396294671074	4018.37205885577	671.990817527909	192.163393175358	619.420189728507	1899.14441180849	282.606706250433	529.294505865247	4850.95430463056	699.103337392657	2.7946910193515	0.00664142414940011	0.125199248235772	Actg2	6	83489887	83513247	-	1557	protein_coding	actin, gamma 2, smooth muscle, enteric [Source:MGI Symbol;Acc:MGI:104589]	-	560	26022	377	204	948	3909	695	201	580	2005	302	498	11.7930817071856	495.155175068829	10.1799839628227	4.77389565228474	21.6209653831308	91.091846740259	15.1815590655955	4.35755698590841	14.248315931982	42.9449476848015	6.36465758608768
ENSMUSG00000057605	158.304226697155	221.493130020945	119.418668848991	156.477952390938	129.505820999198	106.909873144283	69.6163149093661	106.120082798332	79.0294724826027	138.291812530693	73.9269198469676	110.535398815232	148.684945350252	96.2533335638656	0.629407249312383	0.00671622527240181	0.12616559586348	Gm6807	19	45438747	45439634	-	888	processed_pseudogene	predicted gene 6807 [Source:MGI Symbol;Acc:MGI:3649145]	-	171	251	100	151	130	104	72	111	74	146	79	104	6.31409392151915	8.37432898527665	4.7345792500403	6.19577087264678	5.19859210856367	4.24935312104795	2.75765360277646	4.21935088747475	3.18744653823218	5.48310046820136	2.91924697609608
ENSMUSG00000087055	5.55453427007563	26.4732824726229	3.58256006546973	9.32650047363204	2.98859586921226	11.3077750441068	0	6.6922574737687	1.0679658443595	0	0	0	9.8722080325199	1.29337055302137	2.92767674933547	0.00671818552182356	1	Gm11948	11	3303573	3304911	-	539	lncRNA	predicted gene 11948 [Source:MGI Symbol;Acc:MGI:3650068]	-	6	30	3	9	3	11	0	7	1	0	0	0	0.364997910510628	1.64900416270185	0.234005920632789	0.608394264755594	0.197645916615008	0.740468126273661	0	0.438374118179195	0.0709635592927386	0	0
ENSMUSG00000022565	5798.93377795896	9774.81833164147	13020.2174646055	4871.54208072714	7130.78974394046	5080.27493345235	4535.69629499773	3611.90696227116	4538.85483852786	6421.09724072307	4867.01152055795	5480.00496433978	7612.76272205431	4909.09530356959	0.632922807411625	0.00679623820893044	0.12722870630288	Plec	15	76055174	76116774	-	18113	protein_coding	plectin [Source:MGI Symbol;Acc:MGI:1277961]	-	6264	11077	10903	4701	7158	4942	4691	3778	4250	6779	5201	5156	11.3393785795229	18.1184495489867	25.3075428676156	9.45651751298362	14.0331983462926	9.89953516933568	8.80836347509342	7.04055988643719	8.9747569949672	12.4813499611859	9.42221869329186
ENSMUSG00000029819	12.9605799635098	1.76488549817486	10.7476801964092	5.1813891520178	9.96198623070754	1.02797954946426	0	0.956036781966956	3.20389753307849	1.89440839083141	0	0	6.94075009838058	1.00905711764614	2.7958647892783	0.0068484213775085	1	Npy	6	49799690	49806487	+	566	protein_coding	neuropeptide Y [Source:MGI Symbol;Acc:MGI:97374]	-	14	2	9	5	10	1	0	1	3	2	0	0	0.811034815286571	0.104689427997208	0.668529282090495	0.321873290835557	0.627391926121845	0.0641041310731615	0	0.0596374683742014	0.202735115505933	0.117841938519841	0
ENSMUSG00000028843	2522.68431432602	2098.44885732991	1853.37774053634	1517.11074371081	2063.12734837953	1996.33628505958	1321.74309001533	1457.95609249961	2016.31951415073	1718.22841048409	1077.08714865645	1303.04229757187	2008.51421489037	1482.39609222968	0.438480220931407	0.00685879676022516	0.1272682143152	Sh3bgrl3	4	133854717	133856100	-	821	protein_coding	SH3 domain binding glutamic acid-rich protein-like 3 [Source:MGI Symbol;Acc:MGI:1920973]	-	2725	2378	1552	1464	2071	1942	1367	1525	1888	1814	1151	1226	108.830654894488	85.8139623836699	79.4772654385327	64.9724564544025	89.5761306106043	85.8239536661986	56.6298666564476	62.6992458309281	87.9595478321415	73.6852292843153	46.0032887232935
ENSMUSG00000000631	1702.46475377818	1935.19694874874	3447.61696967037	1759.59975602525	1727.40841240469	1721.86574535263	1510.28727622819	1240.93574299311	1447.09371910712	1557.20369726342	1387.76736877282	1664.40802446782	2049.02543099664	1467.94930480541	0.480817662928105	0.00693600156475402	0.127964682027208	Myo18a	11	77654072	77756806	+	16037	protein_coding	myosin XVIIIA [Source:MGI Symbol;Acc:MGI:2667185]	-	1839	2193	2887	1698	1734	1675	1562	1298	1355	1644	1483	1566	3.75998829637977	4.05139665237882	7.56864282711312	3.85785520829017	3.83955877995092	3.7896066261714	3.312669292238	2.7320408814328	3.23176907848445	3.41873153209661	3.0344133146283
ENSMUSG00000049723	3596.56093987397	782.726718440551	1845.01843371691	1347.16117952463	2688.74008366796	2238.93945873315	627.513727446925	838.444257785021	1656.41502460158	828.803670988742	120.716109623529	665.33807363784	2083.19113565953	789.538477347273	1.39981083811468	0.00695542268190266	0.128170223444252	Mmp12	9	7344381	7369499	+	7237	protein_coding	matrix metallopeptidase 12 [Source:MGI Symbol;Acc:MGI:97005]	-	3885	887	1545	1300	2699	2178	649	877	1551	875	129	626	17.6019321905465	3.63123461452081	8.97561606727274	6.54509789683025	13.2434052462238	10.9194748337954	3.0500454130842	4.09050239415819	8.19742365200736	4.03214177504156	0.584908390261995
ENSMUSG00000021969	1097.02051833994	1584.86717736103	1037.74823229773	978.246271900961	1123.71204682381	912.845839924259	826.693739548723	742.840579588325	982.528576810736	861.008613632876	825.361307658549	949.116453288485	1122.40668110795	864.591545087949	0.37730581147661	0.00699894390822245	0.128665858379306	Zdhhc20	14	58070160	58127733	-	7213	protein_coding	zinc finger, DHHC domain containing 20 [Source:MGI Symbol;Acc:MGI:1923215]	-	1185	1796	869	944	1128	888	855	777	920	909	882	893	5.38679329940837	7.37699794666364	5.06521868714418	4.76856195165954	5.55326660818855	4.46683059897678	4.03153434649629	3.63614101158229	4.87860942493875	4.20275684991178	4.01244753167201
ENSMUSG00000037313	286.984270620574	154.4274810903	228.089657501573	231.089956179994	304.836778659651	237.463275926243	144.067096131883	125.240818437671	193.301817829069	219.751373336444	124.459244805654	182.808544194423	240.481903329723	164.938149122524	0.544503958427796	0.00702399063417098	0.128973132890074	Tacc3	5	33815472	33836339	+	3552	protein_coding	transforming, acidic coiled-coil containing protein 3 [Source:MGI Symbol;Acc:MGI:1341163]	-	310	175	191	223	306	231	149	131	181	232	133	172	2.86165075390488	1.45966889683607	2.26076159189424	2.28751143145734	3.05917151003939	2.35961675712037	1.42670273199199	1.24489857265584	1.94908048452711	2.17821799421698	1.22867040449614
ENSMUSG00000035247	2185.70923527476	3003.83511789361	2643.92932831666	2562.715074588	2144.81563547133	2104.27413775333	1785.85185607777	1826.98629033885	1925.54241738017	2081.95482152372	2033.45818768937	2245.78170862102	2440.87975488295	1983.26254693848	0.299612690091364	0.00704135449257246	0.129138775107262	Hectd1	12	51790505	51876319	-	14950	protein_coding	HECT domain E3 ubiquitin protein ligase 1 [Source:MGI Symbol;Acc:MGI:2384768]	-	2361	3404	2214	2473	2153	2047	1847	1911	1803	2198	2173	2113	5.17824610880383	6.74586461882316	6.2263105766657	6.02718179132795	5.11397020995471	4.9679715364299	4.20190166243345	4.3147449075394	4.61294938469507	4.90312323647164	4.76952629186099
ENSMUSG00002076173	57.3968541241149	130.60152686494	69.2628279324149	76.6845594498635	86.6692802071556	65.7906911657123	37.7088372425733	19.1207356393391	54.4662580623343	69.1459062653465	40.2387032078431	55.2676994076161	81.0676232907001	45.9913566375087	0.821169839867178	0.00707182514472036	0.129544120017901	ENSMUSG00002076173	16	10961989	10962045	+	57	miRNA	-	-	62	148	58	74	87	64	39	20	51	73	43	52	35.6652051855092	76.926526355001	42.7806613498378	47.3029505731806	54.2000582913893	40.7387376139333	23.2707260164119	11.8437919648414	34.2231101999665	42.7104668049369	24.7542808206202
ENSMUSG00000019996	526.754999945506	808.317558164086	446.625821495227	662.181533627875	429.361606543495	467.730695006236	248.491568495932	309.755917357294	441.069893720472	409.192212419585	330.331679822526	523.98030399913	556.828702463737	377.13692930249	0.563313226695173	0.00708582253054417	0.129555921472195	Map7	10	20024217	20157336	+	7935	protein_coding	microtubule-associated protein 7 [Source:MGI Symbol;Acc:MGI:1328328]	-	569	916	374	639	431	455	257	324	413	432	353	493	2.35121978938069	3.42009212865283	1.98161384233067	2.93417014718738	1.92879333093535	2.08049614055088	1.10155547611012	1.37826811598419	1.99079836716807	1.81561235484332	1.45977018036576
ENSMUSG00000015880	118.496731094947	28.2381679707978	75.2337613748644	44.5599467073531	110.578047160854	79.1544253087477	19.3378652526017	27.7250666770417	29.9030436420659	60.6210685066051	32.7524328435932	54.2048590343927	76.0435132695939	37.4240559927167	1.02312918502018	0.00713165645862397	0.129871659203577	Ncapg	5	45827261	45857888	+	7066	protein_coding	non-SMC condensin I complex, subunit G [Source:MGI Symbol;Acc:MGI:1930197]	-	128	32	63	43	111	77	20	29	28	64	35	51	0.593969616047486	0.134173147458635	0.374853243085557	0.221730884584087	0.557833642096392	0.395384409910915	0.0962668018706754	0.138535155093991	0.151568360719786	0.302059608048595	0.162536582774825
ENSMUSG00000036707	2759.67777651591	4031.88092058047	3589.72518560067	2539.91696231913	2534.329297092	2441.45142997761	2184.21188028136	2246.68643762235	2520.39939268841	2345.27758784929	2212.19289263584	2383.95095714006	2982.8302620143	2315.45319136955	0.365457805627413	0.00719931904643655	0.130489765245657	Cab39	1	85721162	85779297	+	7077	protein_coding	calcium binding protein 39 [Source:MGI Symbol;Acc:MGI:107438]	-	2981	4569	3006	2451	2544	2375	2259	2350	2360	2476	2364	2243	13.8114944584368	19.1276327561037	17.8580542042554	12.6190157604714	12.7650719795189	12.1763428281895	10.8564345099555	11.2086755241664	12.7551908948333	11.6677672822327	10.9611214580378
ENSMUSG00000044345	2418.99967461794	3434.46717944828	2102.96275843073	2567.89646374002	2234.4735115477	2401.3602275485	2057.54886287682	1926.41411566342	1919.13462231401	2311.17823681432	2020.35721455194	1774.94342328306	2526.69330255553	2001.59607925059	0.336308192632093	0.00722284692777463	0.13064763025395	Marveld1	19	42135839	42140142	+	4304	protein_coding	MARVEL (membrane-associating) domain containing 1 [Source:MGI Symbol;Acc:MGI:2147570]	-	2613	3892	1761	2478	2243	2336	2128	2015	1797	2440	2159	1670	19.9065060466443	26.7910559515643	17.2020992673722	20.9778225053359	18.5059918937006	19.6925984214192	16.8158777933866	15.802959178925	15.9698181111614	18.9061838723794	16.4602752476225
ENSMUSG00000033904	182.373875200817	195.90229029741	222.118724059124	253.888068448872	238.09147091391	174.756523408923	143.100202869253	152.965885114713	105.72861859159	175.232776151905	157.211677649247	194.49978829988	211.188492054843	154.789824779431	0.446930156018273	0.00722490932859881	0.13064763025395	Ccp110	7	118311775	118336247	+	8256	protein_coding	centriolar coiled coil protein 110 [Source:MGI Symbol;Acc:MGI:2141942]	-	197	222	186	245	239	170	148	160	99	185	168	183	0.782392060960715	0.796659157382823	0.947191116243526	1.08125409981024	1.02797741538525	0.747105074110901	0.609694409270183	0.654162928290659	0.458658731518874	0.747288601163554	0.667722961562159
ENSMUSG00000030554	495.27930574841	7564.29924517746	5646.1146631803	560.626306248326	541.93205095049	547.913099864448	1063.58258889309	434.040699012998	547.866478156421	645.993261273511	537.139898634929	460.209881605727	2559.36077852824	614.805467929447	2.05756186844231	0.00733782626872097	0.132380201414373	Synm	7	67379908	67409490	-	7933	protein_coding	synemin, intermediate filament protein [Source:MGI Symbol;Acc:MGI:2661187]	-	535	8572	4728	541	544	533	1100	454	513	682	574	433	2.21128245859904	32.0135599183354	25.0573056049933	2.48479850985989	2.43510000782328	2.43776705582872	4.71601754834244	1.93176382494747	2.47345529930131	2.86703657959921	2.37427572163688
ENSMUSG00000015476	79.6149912044174	120.012213875891	88.3698149482534	75.6482816194599	79.6958898456603	86.3502821549975	83.1528205861873	42.0656184065461	54.4662580623343	42.6241887937067	76.7342712335613	40.3879341824887	88.2819122747798	56.5718485441374	0.641727407412241	0.00738528617960383	0.132927432980622	Prrt1	17	34848507	34852100	+	2306	protein_coding	proline-rich transmembrane protein 1 [Source:MGI Symbol;Acc:MGI:1932118]	-	86	136	74	73	80	84	86	44	51	45	82	38	1.22283269325019	1.74730559616502	1.34917030216239	1.1534397771677	1.23193002666076	1.32166817334882	1.26840904365925	0.64406396894671	0.845931171464914	0.650787982242056	1.16683987732285
ENSMUSG00000026271	146.269402445325	69.712977177907	161.215202946138	102.591505209952	161.384176937462	80.1824048582119	65.7487418588458	65.010501173753	110.000481969028	74.8291314378407	35.5597842301869	70.1474646327435	120.225944929166	70.2160175503997	0.776454854329274	0.00741050107528308	0.132927432980622	Gpr35	1	92878587	92914113	+	4839	protein_coding	G protein-coupled receptor 35 [Source:MGI Symbol;Acc:MGI:1929509]	-	158	79	135	99	162	78	68	68	103	79	38	66	1.07060522335559	0.48368289765108	1.17293110248983	0.745436990232676	1.18881629448159	0.58484587282867	0.477940102265314	0.474339095430102	0.814152494576352	0.544449725044037	0.257682359210597
ENSMUSG00000110618	45.3620298722843	16.7664122326612	48.9616542280864	49.7413358593709	48.8137325304669	31.8673660333919	14.5033989394513	12.4284781655704	38.4467703969418	21.7856964945612	6.55048656871864	19.131126718021	40.2520884593769	18.8076595472107	1.10140127025764	0.00741300000141734	0.132927432980622	Gm39822	11	51789793	51800451	+	2284	lncRNA	predicted gene, 39822 [Source:MGI Symbol;Acc:MGI:5622707]	-	49	19	41	48	49	31	15	13	36	23	7	18	0.703441317461776	0.246460181410239	0.754713490960889	0.765731485588477	0.761825204862665	0.492456691685504	0.223365112308951	0.192124558799201	0.602879555392425	0.335828886963944	0.10056773151374
ENSMUSG00000028634	354.564437573161	524.170992957934	349.896699727544	411.402298670213	438.327394151132	464.646756357844	259.127394384863	272.470482860583	304.370265642456	385.512107534192	332.203247413588	380.496853613973	423.834763239638	322.363391908276	0.395881340349134	0.00743457389418287	0.132927432980622	Hivep3	4	119590981	119995242	+	17627	protein_coding	human immunodeficiency virus type I enhancer binding protein 3 [Source:MGI Symbol;Acc:MGI:106589]	zf-C2H2	383	594	293	397	440	452	268	285	285	407	355	358	0.712439946786959	0.99838328843176	0.698849360408739	0.820622592583324	0.886399757652376	0.930384527186081	0.517102421004356	0.545760482410077	0.618430087976062	0.770020554867752	0.660855733217474
ENSMUSG00000034460	44.4362741606051	195.019847548322	234.060590944023	84.9747820930919	42.8365407920424	61.6787729678553	58.9804890204352	46.8458023163809	30.9710094864254	51.1490265524481	45.8534059810305	70.1474646327435	110.50113475099	50.6578663315773	1.12389872982818	0.00743686006597446	0.132927432980622	Six4	12	73146383	73160230	-	10855	protein_coding	sine oculis-related homeobox 4 [Source:MGI Symbol;Acc:MGI:106034]	Homeobox	48	221	196	82	43	60	61	49	29	54	49	66	0.144990418251665	0.603186632448583	0.759137769977903	0.275242435269643	0.140667569764657	0.200550556540264	0.191126183984845	0.152370847341327	0.102186217900027	0.165901474386017	0.148123159045756
ENSMUSG00000029426	5074.06705571409	5245.23970057569	5308.15983033766	5031.12886660928	4877.38845855441	4780.10490500879	3355.11962132639	3453.20485646465	4573.02974554736	5119.63867622189	3657.04307293607	4375.71381656068	5052.68146946665	4088.95829817617	0.30536548411378	0.00745559307930544	0.133108564330529	Scarb2	5	92589173	92654692	-	6285	protein_coding	scavenger receptor class B, member 2 [Source:MGI Symbol;Acc:MGI:1196458]	-	5481	5944	4445	4855	4896	4650	3470	3612	4282	5405	3908	4117	28.5944938241107	28.0196548423801	29.7345136556707	28.1459116017741	27.6625036210913	26.8441786112098	18.777785524289	19.3989440325331	26.059467449566	28.6798403801157	20.4035617416073
ENSMUSG00000024696	441.585474471013	137.661068857639	309.294352318887	253.888068448872	378.555476766886	252.882969168207	139.232629818732	143.405517295043	278.739085377828	235.853844658511	116.037190645873	129.666525533253	295.644568338584	173.822465554874	0.766558972623285	0.00747435596733687	0.133289811081115	Lpxn	19	12773557	12811171	+	1790	protein_coding	leupaxin [Source:MGI Symbol;Acc:MGI:2147677]	-	477	156	259	245	380	246	144	150	261	249	124	122	8.73762176778528	2.58202730012331	6.08332598254339	4.98705801566108	7.53851706537913	4.98637027603503	2.73608536230781	2.82861512009481	5.57714109371127	4.63908820205457	2.27313572612893
ENSMUSG00000004031	0.925755711679272	45.8870229525464	4.77674675395965	6.21766698242136	0.996198623070754	0	0.966893262630085	0	0	1.89440839083141	1.87156759106247	0	9.8005651706129	0.788811540753994	3.61748080787491	0.00757746564356689	1	Brinp2	1	158072839	158183896	-	8767	protein_coding	bone morphogenic protein/retinoic acid inducible neural-specific 2 [Source:MGI Symbol;Acc:MGI:2443333]	-	1	52	4	6	1	0	1	0	0	2	2	0	0.00374004550711433	0.175728256234392	0.0191824175842855	0.0249362768490373	0.00405046002264132	0	0.00387944121146454	0	0	0.0076079088858481	0.00748575661253672
ENSMUSG00000020661	1587.67104552995	1343.96030686016	1474.82056028504	1345.08862386382	1560.0470437288	1099.93811792675	1068.41705520624	1082.23363718659	1396.89932442222	1045.71343173894	998.481309831828	1166.99872979928	1401.92094969909	1126.45724803085	0.31598474530711	0.0076057628367017	0.134629654010912	Dnmt3a	12	3856007	3964443	+	16642	protein_coding	DNA methyltransferase 3A [Source:MGI Symbol;Acc:MGI:1261827]	-	1715	1523	1235	1298	1566	1070	1105	1132	1308	1104	1067	1098	3.37898683559034	2.71133792042114	3.12000863594171	2.84184601407976	3.3415010099126	2.33281720108929	2.25827559887665	2.29602461464796	3.00625891503979	2.21232980024223	2.1038540834332
ENSMUSG00000024174	281.429736350499	331.798473656874	257.944324713821	276.686180717751	334.722737351773	267.274682860706	269.763220273794	226.580717326169	216.797066404978	246.273090808083	221.780759540903	237.013403228815	291.642689275237	236.368042930457	0.304630992789019	0.00762730238962906	0.134629654010912	Pot1b	17	55958951	56019628	-	5268	protein_coding	protection of telomeres 1B [Source:MGI Symbol;Acc:MGI:1920086]	-	304	376	216	267	336	260	279	237	203	260	237	223	1.89215064618544	2.1146151583764	1.72386138343153	1.84670218138387	2.2648991446877	1.79072967515688	1.80126918131241	1.51858186838499	1.47392174774745	1.64593960445899	1.47624790135155
ENSMUSG00000010311	123.125509653343	631.8290083466	107.476801964092	214.509510893537	112.570444406995	171.672584760531	67.682528384106	74.5708689934226	183.690125229833	131.661383162783	61.7617305050615	98.844154709775	226.86397667085	103.03513183083	1.14059367914465	0.00763961025729009	0.134629654010912	Optc	1	133824937	133835737	-	2575	protein_coding	opticin [Source:MGI Symbol;Acc:MGI:2151113]	-	133	716	90	207	113	167	70	78	172	139	66	93	1.69356668030908	8.23806190921097	1.46946630548823	2.92903444666994	1.55831972081169	2.35310705914461	0.92457253478201	1.02247571020747	2.55490860384901	1.8002129458466	0.84105309954548
ENSMUSG00000037944	83.3180140511345	39.7099237089344	53.738400982046	70.4668924674421	114.562841653137	50.3709979237485	29.9736911415326	55.4501333540835	36.3108387082229	52.0962307478638	33.6882166391245	25.5081689573613	68.6945117977404	38.8378799246981	0.821141563602018	0.00768865005140164	0.134629654010912	Ccr7	11	99035022	99045903	-	1978	protein_coding	chemokine (C-C motif) receptor 7 [Source:MGI Symbol;Acc:MGI:103011]	-	90	45	45	68	115	49	31	58	34	55	36	24	1.49191511955431	0.67402419896079	0.956490327763449	1.25260457206056	2.06455715223817	0.898818994531375	0.533034830196258	0.989776952370215	0.657471277855777	0.927305244217054	0.597218052577335
ENSMUSG00000038141	823.922583394552	840.085497131234	742.784120240725	701.56009118321	767.07293976448	760.704866603549	641.050233123746	637.67653357196	662.138823502887	689.564654262633	603.580548117647	742.925420883148	772.688349719625	662.82270224367	0.222584260580418	0.00772815665542849	0.135090523004919	Tmem181a	17	6307135	6358589	+	6548	protein_coding	transmembrane protein 181A [Source:MGI Symbol;Acc:MGI:1924356]	-	890	952	622	677	770	740	663	667	620	728	645	699	4.45665718924489	4.30742317246423	3.99370581040051	3.76713657082927	4.17577808861366	4.10039313663454	3.44369784818312	3.43837146236489	3.62165581008665	3.7077378652431	3.23227093793987
ENSMUSG00000042699	3074.43471848686	2677.33130073126	2898.29109296501	3169.97388320449	2521.37871499208	2775.54478355349	1868.03778340132	2116.66543527484	2056.90221623639	2773.41388417719	2339.45948882809	2679.42058089616	2852.82574898887	2305.64989813566	0.307187499003234	0.00773242479374368	0.135090523004919	Dhx9	1	153331504	153363406	-	9603	protein_coding	DEAH (Asp-Glu-Ala-His) box polypeptide 9 [Source:MGI Symbol;Acc:MGI:108177]	-	3321	3034	2427	3059	2531	2700	1932	2214	1926	2928	2500	2521	11.3393938486987	9.3604754811849	10.6256915232582	11.6065705407256	9.3592397604722	10.2013884313241	6.84258773788997	7.7822704278822	7.67138023447069	10.1683493141794	8.54259453062967
ENSMUSG00000026073	37.9559841788501	25.5908397235355	40.602347408657	44.5599467073531	32.8745545613349	42.1471615280345	16.4371854647114	9.56036781966956	28.8350777977064	23.6801048853926	1.87156759106247	21.2568074644677	37.2884723512942	16.9401851705017	1.14267798078673	0.00774915916135764	0.135210428717084	Il1r2	1	40113239	40164391	+	1908	protein_coding	interleukin 1 receptor, type II [Source:MGI Symbol;Acc:MGI:96546]	-	41	29	34	43	33	41	17	10	27	25	2	20	0.704584977670716	0.450307198937676	0.749195056169898	0.821148024355952	0.61417329120041	0.779664814299678	0.303033563268063	0.176911986896216	0.541264506492256	0.436966307666603	0.0343960315629504
ENSMUSG00000025790	1088.68871693482	922.152672796365	818.017881615589	900.525434620694	927.460918078872	905.649983078009	725.169946972564	804.982970416177	862.916402242472	583.477784376075	749.562820220519	803.507322156881	927.082601187392	754.936207730781	0.297307639601681	0.00776117969415545	0.135210428717084	Slco3a1	7	73925167	74204528	-	8474	protein_coding	solute carrier organic anion transporter family, member 3a1 [Source:MGI Symbol;Acc:MGI:1351867]	-	1176	1045	685	869	931	881	750	842	808	616	801	756	4.55037045763332	3.65356714523888	3.39857194502538	3.73648018859174	3.90136495046261	3.77215819484395	3.0101835999153	3.35397068421406	3.64709483534331	2.42425648551887	3.10170699822455
ENSMUSG00000027009	347.158391879727	180.018320813836	413.188594217509	383.422797249317	527.985270227499	275.49851925642	204.014478414948	223.712606980268	313.981958241692	221.645781727275	209.615570198997	233.824882109145	354.545315607385	234.465879612054	0.596317548062801	0.00776549332188691	0.135210428717084	Itga4	2	79085770	79163467	+	13978	protein_coding	integrin alpha 4 [Source:MGI Symbol;Acc:MGI:96603]	-	375	204	346	370	530	268	211	234	294	234	224	220	0.87965854273335	0.432388757843383	1.04069967478637	0.96446851576452	1.34643747315804	0.695652270298019	0.513402052675056	0.56507546582864	0.804500743087932	0.558286511136138	0.525847357338407
ENSMUSG00000039115	373.079551806747	743.016794731617	484.839795526904	463.216190190391	557.871228919622	438.947267621237	323.909242981078	401.535448426122	373.788045525823	412.981029201248	358.405193688463	406.005022571334	510.16180479942	379.437330399011	0.427821221333845	0.00781982346447917	0.136003424052442	Itga9	9	118435758	118730071	+	7691	protein_coding	integrin alpha 9 [Source:MGI Symbol;Acc:MGI:104756]	-	403	842	406	447	560	427	335	420	350	436	383	382	1.71810668589665	3.24353465605808	2.21941020395076	2.11765924659934	2.58559543497049	2.01440834820229	1.48143355464891	1.84332583304059	1.74064171896699	1.89055793916086	1.63407759778104
ENSMUSG00000056124	709.128875146322	887.737405581955	708.152706274517	635.238310037382	804.928487441169	699.026093635694	496.016243729234	516.259862262157	642.915438304416	753.974539550901	484.73600608518	567.556759301289	740.701979686173	576.909808205529	0.361142886294609	0.00789772980681956	0.136591016401966	B4galt6	18	20817656	20879461	-	5808	protein_coding	UDP-Gal:betaGlcNAc beta 1,4-galactosyltransferase, polypeptide 6 [Source:MGI Symbol;Acc:MGI:1928380]	-	766	1006	593	613	808	680	513	540	602	796	518	534	4.32444178443999	5.13169262602429	4.29261997211298	3.84560996011443	4.94014970367513	4.24800240486198	3.00407616128902	3.13836016423742	3.96455127275985	4.57059535235669	2.92657639626831
ENSMUSG00000049100	2.77726713503782	14.1190839853989	0	5.1813891520178	4.98099311535377	0	0	0	0	0	0	0	4.50978889796805	0	4.63979184733021	0.00794755155986625	1	Pcdh10	3	45332833	45390058	+	15888	protein_coding	protocadherin 10 [Source:MGI Symbol;Acc:MGI:1338042]	-	3	16	0	5	5	0	0	0	0	0	0	0	0.00619127246240018	0.0298359598421046	0	0.0114665333970874	0.011175221241974	0	0	0	0	0	0
ENSMUSG00000105408	36.1044727554916	62.6534351852076	33.4372272777175	34.1971684033175	29.8859586921226	26.7274682860706	7.73514610104068	30.5931770229426	20.2913510428304	12.3136545404042	28.0735138659371	11.6912441054573	37.1676217666546	18.449681113102	1.01158335597892	0.00800339824176146	0.137733791656812	Gm7285	5	137599855	137600434	+	580	processed_pseudogene	predicted gene 7285 [Source:MGI Symbol;Acc:MGI:3647212]	-	39	71	28	33	30	26	8	32	19	13	30	11	2.20477617150687	3.6267666840481	2.02966514608624	2.07308597456087	1.83674394923257	1.62647653943559	0.469118084150478	1.86233418481644	1.25299622537403	0.747483606576719	1.69726624712352
ENSMUSG00000032726	13.8863356751891	84.7145039123933	32.2430405892276	18.6530009472641	27.8935614459811	26.7274682860706	0.966893262630085	5.73622069180174	16.0194876653924	13.2608587358199	8.42205415978112	25.5081689573613	34.0196518093543	11.6522805787978	1.55466316127347	0.00803390613771303	0.137733791656812	Bmp8a	4	123206438	123237045	-	2405	protein_coding	bone morphogenetic protein 8a [Source:MGI Symbol;Acc:MGI:104515]	-	15	96	27	18	28	26	1	6	15	14	9	24	0.204505066284021	1.18262053215307	0.472001131388633	0.27270229413993	0.41342649668104	0.392247980404426	0.0141418133475716	0.084211576964153	0.238561487268936	0.194132956513768	0.122795977962367
ENSMUSG00000036526	362.896238978275	121.777099374065	174.351256519527	179.276064659816	328.745545613349	166.532687013209	90.887966687228	79.3510529032574	225.340793159854	148.711058680266	57.0828115274053	111.598239188456	222.26314869304	118.828653691078	0.904904567510291	0.0080349902361975	0.137733791656812	Card11	5	140858745	140986337	-	4866	protein_coding	caspase recruitment domain family, member 11 [Source:MGI Symbol;Acc:MGI:1916978]	-	392	138	146	173	330	162	94	83	211	157	61	105	2.64144672270069	0.84022624763727	1.26146471559643	1.29540439342524	2.4082257287513	1.20793998897664	0.657015976877416	0.575760170424011	1.65857267464116	1.07600393965785	0.411352786842239
ENSMUSG00000039193	118.496731094947	54.7114504434207	80.0105081288241	105.700338701163	103.604656799358	56.5388752205341	33.841264192053	65.010501173753	73.6896432608052	58.7266601157737	39.3029194123119	41.4507745557121	86.5104267313745	52.0036271184015	0.735277980278566	0.00809619015110298	0.137932678101654	Nlrc4	17	74732433	74766137	-	4807	protein_coding	NLR family, CARD domain containing 4 [Source:MGI Symbol;Acc:MGI:3036243]	-	128	62	67	102	104	55	35	68	69	62	42	39	0.873099502182554	0.382126212531519	0.585996519784476	0.773138707156995	0.768271236514173	0.415136592533288	0.247636184425179	0.477496751151709	0.549033853475399	0.430134107191416	0.286702765272373
ENSMUSG00000038943	274.949446368744	90.0091604069179	192.264056846876	161.659341542955	376.563079520745	139.805218727139	62.8480620709555	65.96653795572	155.923013276486	155.341488048176	71.1195684603739	139.232088892264	205.875050568896	108.405126450663	0.926244776898449	0.00811216617458759	0.137987055182903	Prc1	7	79944198	79966007	+	8225	protein_coding	protein regulator of cytokinesis 1 [Source:MGI Symbol;Acc:MGI:1858961]	-	297	102	161	156	378	136	65	69	146	164	76	131	1.18399109439256	0.367412161527952	0.822970609385728	0.691066847115291	1.63196653872239	0.599936728691511	0.268780422074058	0.283171026125965	0.678955177505504	0.664958060861141	0.303203631907618
ENSMUSG00000047696	46.2877855839636	49.4167939488961	75.2337613748644	77.720837280267	40.8441435459009	64.7627116162481	25.1392248283822	40.1535448426122	39.5147362413013	43.5713929891224	9.35783795531235	35.0737323163718	59.04433889169	32.135078195517	0.876872744791908	0.00816649883337256	0.13851237066442	Ccdc144b	3	36061393	36107696	-	6768	protein_coding	coiled-coil domain containing 144B [Source:MGI Symbol;Acc:MGI:2681852]	-	50	56	63	75	41	63	26	42	37	46	10	33	0.242235364663648	0.245141556575022	0.391358306093756	0.403768356854887	0.215119046063587	0.337740116106204	0.130657149619334	0.209471320654775	0.209105535309558	0.226664650657698	0.0484837678945844
ENSMUSG00000022372	352.712926149803	168.546565075699	318.847845826806	318.137293933893	276.94321721367	324.841537630705	213.683411041249	152.009848332746	265.923495245514	221.645781727275	135.688650352029	212.568074644677	293.338230971763	200.253210223915	0.55090526808274	0.00816943095444569	0.13851237066442	Sla	15	66652668	66703678	-	9186	protein_coding	src-like adaptor [Source:MGI Symbol;Acc:MGI:104295]	-	381	191	267	307	278	316	221	159	249	234	145	200	1.3599609170577	0.616021952050194	1.22202242746305	1.21770839891505	1.07466650110407	1.24813939334001	0.818250000359354	0.584260214333538	1.03680494842562	0.84952415117145	0.517962447866637
ENSMUSG00000020901	905.389086022328	377.68549660942	711.735266339987	644.564810511014	910.525541486669	557.164915809626	335.511962132639	304.019696665492	728.352705853176	470.760485121606	261.083678953215	443.204435634152	684.510852796507	423.822160726713	0.692027891513059	0.00820132831731817	0.138559496616286	Pik3r5	11	68322947	68388675	+	5550	protein_coding	phosphoinositide-3-kinase regulatory subunit 5 [Source:MGI Symbol;Acc:MGI:2443588]	-	978	428	596	622	914	542	347	318	682	497	279	417	5.77794980607787	2.28475716697906	4.51489477283843	4.08346435262124	5.84801623043347	3.54330675631998	2.12645733369651	1.93405921761005	4.70019143583642	2.9864119810368	1.64955930396113
ENSMUSG00000000555	2157.93656392438	2672.03664423674	1957.27198243496	1486.02240879871	2346.04775733162	2133.05756513833	1560.56572588496	1586.06502128318	1832.62938892089	1862.20344818728	1414.90509884323	1692.04187417163	2125.39548697746	1658.06842621519	0.358557788794726	0.0082687389705757	0.138931558247092	Itga5	15	103252713	103275190	-	4933	protein_coding	integrin alpha 5 (fibronectin receptor alpha) [Source:MGI Symbol;Acc:MGI:96604]	-	2331	3028	1639	1434	2355	2075	1614	1659	1716	1966	1512	1592	15.493839440055	18.1858673012527	13.9688995480329	10.5917910102143	16.9525546338048	15.2619291990421	11.1278841712686	11.3519612768224	13.3054731634456	13.2910322460556	10.0576701674265
ENSMUSG00000059149	508.23988571192	1475.44427647418	656.802678669451	652.855033154243	567.83321515033	439.975247170701	379.022158950993	363.293977147443	353.496694482993	477.390914489515	438.882600104149	623.887299082128	716.858389388472	439.328940709537	0.706927460922699	0.00827357317600197	0.138931558247092	Mfsd4a	1	131950544	131995800	-	7187	protein_coding	major facilitator superfamily domain containing 4A [Source:MGI Symbol;Acc:MGI:2442786]	-	549	1672	550	630	570	428	392	380	331	504	469	587	2.50468198824522	6.89251771003295	3.21743217715275	3.1939217488839	2.81632368450577	2.16072040409228	1.85506274545103	1.78472613022447	1.76158865310397	2.33867140322277	2.14132166663207
ENSMUSG00000021377	1182.19004381443	1216.88855099157	1289.7216235691	958.556993123293	1262.18365543064	1086.57438378372	894.376267932829	986.629958989899	1048.74245916102	1014.45569329022	951.692120055266	1017.13823717478	1166.01920845213	985.505789434003	0.242761407804355	0.00827470148261812	0.138931558247092	Dek	13	47238251	47259677	-	3185	protein_coding	DEK proto-oncogene (DNA binding) [Source:MGI Symbol;Acc:MGI:1926209]	-	1277	1379	1080	925	1267	1057	925	1032	982	1071	1017	957	13.1464760229302	12.8275610994996	14.2563607031669	10.5819002459627	14.1261084095557	12.0411509149425	9.87762371062525	10.9371933836708	11.7930518073871	11.2141496614739	10.4777547726664
ENSMUSG00000085941	2.77726713503782	3.52977099634972	5.97093344244956	4.14511132161424	0	3.08393864839277	0	0	0	0	0.935783795531235	0	3.25117025730735	0.155963965921873	3.67367004744313	0.00837079817041358	1	Gm11201	11	78914423	78921883	+	701	lncRNA	predicted gene 11201 [Source:MGI Symbol;Acc:MGI:3649951]	-	3	4	5	4	0	3	0	0	0	0	1	0	0.140323733070776	0.169056251772952	0.299879199289286	0.207909024379943	0	0.155276482970368	0	0	0	0	0.0468100058645573
ENSMUSG00000037533	633.216906788622	750.076336724316	640.084065030592	733.684703925721	726.228796218579	665.102768503373	588.837996941722	469.414059945776	587.381214397723	634.626810928523	604.516331913178	592.002087885427	691.398929531867	579.463083668724	0.255311723033939	0.00837236739316543	0.14010364851763	Rapgef6	11	54413673	54590111	+	13295	protein_coding	Rap guanine nucleotide exchange factor (GEF) 6 [Source:MGI Symbol;Acc:MGI:2384761]	-	684	850	536	708	729	647	609	491	550	670	646	557	1.68692452871275	1.89417389279642	1.69500429972409	1.94033305889358	1.94712818506836	1.76570598023722	1.55793427682993	1.24660476013545	1.58233525026945	1.68063256583281	1.5944132317218
ENSMUSG00000041238	465.655122974674	560.351145670518	427.518834479388	417.619965652635	395.490853359089	368.016678708203	343.24710823368	349.909462199906	376.991943058902	362.779206844215	351.854707119744	353.925844283388	439.108766807418	356.451378623306	0.30247528293944	0.0083930919002645	0.140298779183795	Rbbp8	18	11766333	11878278	+	12521	protein_coding	retinoblastoma binding protein 8, endonuclease [Source:MGI Symbol;Acc:MGI:2442995]	-	503	635	358	403	397	358	355	366	353	383	376	333	1.31721559119226	1.50253283749207	1.20209382789299	1.17272827877979	1.1259182220544	1.03740051681915	0.964294121142315	0.986683124233374	1.07835025444865	1.02010780881935	0.985384083200748
ENSMUSG00000047678	2.77726713503782	4.41221374543715	8.35930681942938	0	3.98479449228301	8.22383639571404	0.966893262630085	0.956036781966956	0	0.947204195415705	0	0	4.6262364313169	0.478355706668791	3.22357368128074	0.00841115747993646	1	Gpr82	X	13527602	13533672	+	2497	protein_coding	G protein-coupled receptor 82 [Source:MGI Symbol;Acc:MGI:2441734]	-	3	5	7	0	4	8	1	1	0	1	0	0	0.0393940476101779	0.0593254067345011	0.117862012888468	0	0.0568848746792094	0.116244896075	0.0136207693636002	0.0135181446134554	0	0.013355734321632	0
ENSMUSG00000050503	71.2831897993039	1249.5389327078	134.94309579936	75.6482816194599	136.479211360693	237.463275926243	97.6562195256386	42.0656184065461	50.1943946848963	161.971917416086	85.1563253933424	80.7758683649774	317.559331202144	86.3033906319144	1.87975639873514	0.00842481974199052	0.14052563015762	Fbxl22	9	66415657	66421891	-	4035	protein_coding	F-box and leucine-rich repeat protein 22 [Source:MGI Symbol;Acc:MGI:1921415]	-	77	1416	113	73	137	231	101	44	47	171	91	76	0.625712857493704	10.3970223302268	1.17741417661969	0.659190118004636	1.20568091041735	2.07716449102641	0.851330153950898	0.368082159204737	0.445531560734311	1.41331472882049	0.74003893038562
ENSMUSG00000023993	17.5893585219062	9.70687023996174	13.136053573389	23.8343900992819	8.96578760763678	25.6994887366064	7.73514610104068	3.82414712786783	6.40779506615697	13.2608587358199	0.935783795531235	4.25136149289355	16.488658129797	6.06918205321836	1.43911083360805	0.00845375201976137	1	Treml1	17	48666944	48674204	+	1402	protein_coding	triggering receptor expressed on myeloid cells-like 1 [Source:MGI Symbol;Acc:MGI:1918576]	-	19	11	11	23	9	25	8	4	6	14	1	4	0.444358488057458	0.232452346187809	0.329867119218214	0.597738445092336	0.227955383142987	0.646985345709868	0.194071675326161	0.0963047278168274	0.163691976285818	0.333016947514702	0.0234050029322787
ENSMUSG00000019823	365.673506113312	471.224428012688	363.032753300933	325.391238746718	468.213352843254	389.604249246953	307.472057516367	332.700800124501	294.758573043221	378.881678166282	289.157192819152	263.5844125594	397.18992137731	311.092452371487	0.352772995775216	0.00848863493142508	0.141285570003794	Mical1	10	41352310	41363028	+	6047	protein_coding	microtubule associated monooxygenase, calponin and LIM domain containing 1 [Source:MGI Symbol;Acc:MGI:2385847]	-	395	534	304	314	470	379	318	348	276	400	309	248	2.14183011237708	2.61631813093998	2.11362516571338	1.89199962759909	2.7600264624927	2.27405880155915	1.78857572847516	1.94256207552997	1.7457950941996	2.20600420711858	1.67677667608995
ENSMUSG00000054737	221.255615091346	285.02900795524	212.565230551204	278.758736378558	230.121881929344	203.539950793923	156.636708546074	183.559062137656	174.078432630598	221.645781727275	179.670488741997	198.751149792773	238.545070449936	185.723603929395	0.362365002222578	0.00850897404236856	0.141471975512162	Zfp182	X	20895178	20928555	-	5733	protein_coding	zinc finger protein 182 [Source:MGI Symbol;Acc:MGI:2442220]	zf-C2H2	239	323	178	269	231	198	162	192	163	234	192	187	1.36692237426273	1.66920563819933	1.30536636068092	1.7096283280264	1.43082129378557	1.25309990600158	0.961066090763538	1.1304592644621	1.08750138300752	1.36119463678021	1.09894510889979
ENSMUSG00000022860	10.183312828472	234.729771257257	100.311681833153	5.1813891520178	0.996198623070754	3.08393864839277	5.80135957578051	0	6.40779506615697	14.2080629312356	4.67891897765618	0	59.0810487237271	5.18268942513821	3.50964470865921	0.00859299044488305	0.142409956205936	Chodl	16	78727836	78748621	+	5491	protein_coding	chondrolectin [Source:MGI Symbol;Acc:MGI:2179069]	-	11	266	84	5	1	3	6	0	6	15	5	0	0.0656854431924212	1.43522323088214	0.643164697539621	0.0331779789861455	0.00646701566536085	0.0198231314081639	0.0371637892197155	0	0.0417949646244248	0.091101626118508	0.0298796340475821
ENSMUSG00000052477	336.975079051255	412.10076382383	218.536163993654	323.318683085911	340.699929090198	332.037394476955	291.034872051656	243.789379401574	192.233851984709	180.9160013244	213.358705381122	299.720985248995	327.278002253634	236.842299232076	0.468463664301683	0.00860925674392852	0.142526935977828	C130026I21Rik	1	84970411	85248287	-	3827	protein_coding	RIKEN cDNA C130026I21 gene [Source:MGI Symbol;Acc:MGI:3612702]	-	364	467	183	312	342	323	301	255	180	191	228	282	3.11867999523313	3.61532780076796	2.01042086869231	2.97048592501869	3.17338672388967	3.0622913599512	2.67502727759963	2.249144450078	1.79902914099334	1.66441345775098	1.95493849420446
ENSMUSG00000042046	758.193927865324	913.328245305491	918.329563448742	782.389761954688	866.692802071556	754.536989306764	668.123244477389	703.64307152768	663.206789347247	757.763356332564	764.535360949019	692.971923341648	832.245214992094	708.373957662591	0.231875013904543	0.00863253123793688	0.142607204943463	Dstyk	1	132345293	132394696	+	9345	protein_coding	dual serine/threonine and tyrosine protein kinase [Source:MGI Symbol;Acc:MGI:1925064]	-	819	1035	769	755	870	734	691	736	621	800	817	652	2.87364085275052	3.28133300241008	3.45972349024453	2.94373704382576	3.30594256030946	2.84983163505174	2.51488959023313	2.65848453990919	2.54177117206059	2.85494006216074	2.86879466332067
ENSMUSG00000026123	1588.59680124163	2595.26412506613	1584.68573562611	1370.99556962391	1545.10406438274	1357.96098484228	1175.74220735818	1158.71657974395	1322.14171531706	1466.27209450351	1202.48217725764	1206.32382360854	1673.76788013047	1255.27976629815	0.415423766684933	0.00865563693946271	0.142836465016997	Plekhb2	1	34889057	34918661	+	7987	protein_coding	pleckstrin homology domain containing, family B (evectins) member 2 [Source:MGI Symbol;Acc:MGI:2385825]	-	1716	2941	1327	1323	1551	1321	1216	1212	1238	1548	1285	1135	7.04468359795358	10.9093933880506	6.98524421978901	6.03542040558157	6.89578115208313	6.00097174728532	5.17809569283913	5.12217681294043	5.92872239538966	6.46358680287045	5.27929775043261
ENSMUSG00000109005	2.77726713503782	16.7664122326612	15.5244269503688	4.14511132161424	5.97719173842452	2.05595909892851	2.90067978789026	0.956036781966956	3.20389753307849	1.89440839083141	0.935783795531235	1.06284037322339	7.87439474617252	1.82560777708696	2.11273430802342	0.00869459955499901	1	Gm45221	7	89835135	89837406	+	2272	TEC	predicted gene 45221 [Source:MGI Symbol;Acc:MGI:5753797]	-	3	19	13	4	6	2	3	1	3	2	1	1	0.0432953067265027	0.247761907720505	0.2405633048524	0.064147986835537	0.0937774199432125	0.0319392061508885	0.0449089715240884	0.0148568693220942	0.0505053148663549	0.0293567505291507	0.0144426998728234
ENSMUSG00000049076	1778.37672213588	2335.82595683443	1694.55091096718	2019.70549145654	1941.5911163649	1580.00456752656	1538.32718084447	1390.07748097995	1423.59847053121	1688.8650804262	1430.81342336726	1762.18933880438	1891.67579421425	1538.97849582558	0.298068177035905	0.00872287202338677	0.143285586943979	Acap2	16	30911230	31020063	-	7183	protein_coding	ArfGAP with coiled-coil, ankyrin repeat and PH domains 2 [Source:MGI Symbol;Acc:MGI:1925868]	-	1921	2647	1419	1949	1949	1537	1591	1454	1333	1783	1529	1658	8.76898629873784	10.9178553810576	8.30559758423608	9.88638092197108	9.63521321217452	7.76373047390342	7.53328667848354	6.83272859851125	7.09820337262451	8.27812138602092	6.98487007876968
ENSMUSG00000026442	42.5847627372465	92.6564886541802	93.1465617022131	44.5599467073531	45.8251366612547	34.9513046817847	16.4371854647114	15.2965885114713	21.3593168871899	64.409885288268	4.67891897765618	24.4453285841379	58.9540335240054	24.4378706189058	1.26946545607464	0.00872913679747865	0.143285586943979	Nfasc	1	132492428	132669535	-	14145	protein_coding	neurofascin [Source:MGI Symbol;Acc:MGI:104753]	-	46	105	78	43	46	34	17	16	20	68	5	23	0.106630825889013	0.219925510988832	0.231838739607487	0.110763551111429	0.115480920385354	0.0872124353744729	0.0408757892340377	0.0381814714455121	0.0540818076476297	0.160321687159832	0.0115990859353322
ENSMUSG00000004099	1308.09282060281	933.624428534502	988.786578069647	908.815657263922	1259.19505956143	939.57330821033	686.49421646736	815.499375017814	758.255749495242	954.781828979031	807.581415543456	954.430655154602	1056.34797537377	829.507206776251	0.349027374345647	0.00874885756388632	0.143287391722584	Dnmt1	9	20818505	20871184	-	7377	protein_coding	DNA methyltransferase (cytosine-5) 1 [Source:MGI Symbol;Acc:MGI:94912]	-	1413	1058	828	877	1264	914	710	853	710	1008	863	898	6.28044289978463	4.24908233622828	4.71894493385066	4.33162824594104	6.08446850147479	4.49540538203771	3.27339750327313	3.90305685998749	3.6813127973076	4.55687444081931	3.83873140542771
ENSMUSG00000008305	1149.78859390566	1012.16183320328	935.0481770876	1346.12490169422	1066.92872530878	1268.52676403889	968.827049155345	857.56499342436	937.674011347637	1062.76310725642	792.608874814956	880.031829028964	1129.76316587307	916.578310837947	0.301823884633865	0.00880148999331519	0.143517910607907	Tle1	4	72035379	72119156	-	8711	protein_coding	transducin-like enhancer of split 1 [Source:MGI Symbol;Acc:MGI:104636]	-	1242	1147	783	1299	1071	1234	1002	897	878	1122	847	828	4.67499849264175	3.90107829380343	3.77909756729425	5.43341033438617	4.36593045721613	5.13983994067997	3.91218955609132	3.47584226478232	3.85523323692047	4.29547461490658	3.19059815773887
ENSMUSG00000028033	24.9954042153403	129.719084115852	411.994407529019	42.487391046546	20.9201710844858	24.6715091871421	60.9142755456954	15.2965885114713	34.1749070195039	24.6273090808083	31.816649048062	36.1365726895952	109.131327863064	33.8277169825227	1.68803278236532	0.00880233644859482	0.143517910607907	Kcnq5	1	21468627	22032166	-	7689	protein_coding	potassium voltage-gated channel, subfamily Q, member 5 [Source:MGI Symbol;Acc:MGI:1924937]	-	27	147	345	41	21	24	63	16	32	26	34	34	0.115138825847773	0.566417595800734	1.88644257906405	0.194287724987123	0.0969850492116563	0.113251465274785	0.27867041869649	0.0702402020544633	0.159185781074412	0.112769018549746	0.14509945113485
ENSMUSG00000001151	650.806265310528	690.952672535458	1150.00178101578	757.519094025002	700.32763201874	670.242666250695	660.388098376348	519.127972608057	543.594614778983	627.049177365197	566.149196296397	602.63049161766	769.975018526035	586.489925173774	0.39153470129195	0.00880618695359233	0.143517910607907	Pcnt	10	76187097	76278620	-	12154	protein_coding	pericentrin (kendrin) [Source:MGI Symbol;Acc:MGI:102722]	-	703	783	963	731	703	652	683	543	509	662	605	567	1.89654864320327	1.90867415340409	3.33120539591613	2.19143963452441	2.0539574841207	1.94639424865813	1.91126828467346	1.50805169122843	1.60185317224964	1.81645678903556	1.63340114671615
ENSMUSG00000021932	187.928409470892	212.668702530071	188.681496781406	203.110454759098	177.323354906594	187.092278002495	151.802242232923	181.646988573722	149.515218210329	163.866325806917	151.59697487606	138.16924851904	192.800782741759	156.099499703165	0.304213825114193	0.0088081927177151	0.143517910607907	Rnaseh2b	14	62530038	62610441	+	6243	protein_coding	ribonuclease H2, subunit B [Source:MGI Symbol;Acc:MGI:1914403]	-	203	241	158	196	178	182	157	190	140	173	162	130	1.06618015842654	1.14370223573499	1.06404037657801	1.14391591837685	1.01246967440211	1.05774383311045	0.855315808560438	1.02729670814698	0.857746305338788	0.924142794809053	0.851487728013913
ENSMUSG00000029313	2717.09301377866	2542.31756012089	2907.84458647293	4159.61921123989	2968.67189675085	3818.94402625971	1725.9044737947	1651.07552245693	2078.26153312358	2816.98527716631	2167.27527045034	3207.65224638818	3185.74838243716	2274.52572056334	0.486078165002754	0.00884117618564876	0.143662093079037	Aff1	5	103840240	104003188	+	9458	protein_coding	AF4/FMR2 family, member 1 [Source:MGI Symbol;Acc:MGI:1100819]	AF-4	2935	2881	2435	4014	2980	3715	1785	1727	1946	2974	2316	3018	10.1750532089403	9.02470908257216	10.8241552344863	15.4635579278554	11.1885114606808	14.2515452914174	6.41887757085258	6.16351785381171	7.86987223099998	10.4864373884242	8.03518645392289
ENSMUSG00000003283	299.019094872405	115.600000130453	211.371043862714	128.498450970041	280.928011705953	149.057034672317	124.729230879281	118.548560963903	175.146398474957	131.661383162783	86.0921091888736	76.5245068720839	197.412272702314	118.78369825698	0.733197477746601	0.00884488498638944	0.143662093079037	Hck	2	152950388	152993361	+	2092	protein_coding	hemopoietic cell kinase [Source:MGI Symbol;Acc:MGI:96052]	-	323	131	177	124	282	145	129	124	164	139	92	72	5.06254311871962	1.85523478209392	3.55718082315647	2.15968977476125	4.78677247190057	2.51483080170859	2.09724038337349	2.0007629447299	2.99851567267731	2.21584528468212	1.44305492266589
ENSMUSG00000021669	1904.27949892426	2696.74504121119	1920.25219509178	2224.88850187644	1878.83060311144	1849.3352094862	1593.44009681438	1714.17395006675	1607.28859576104	1699.28432657578	1659.14466947688	1924.80391590755	2079.05517495022	1699.6892591004	0.291003875339154	0.0088541870065632	0.143662432572947	Cert1	13	96679126	96776675	+	8236	protein_coding	ceramide transporter 1 [Source:MGI Symbol;Acc:MGI:1915268]	-	2057	3056	1608	2147	1886	1799	1648	1793	1505	1794	1773	1811	8.1892823849578	10.9932543011813	8.20850491676729	9.49832605075158	8.13168800059304	7.92532853316531	6.80551586866186	7.348514950211	6.98947116081509	7.26427730335121	7.06397431021126
ENSMUSG00000036825	361.970483266595	616.827481612114	454.985128314656	353.370740167614	335.718935974844	372.12859690606	274.597686586944	265.778225386814	326.797548374006	317.313405464261	272.313084499589	376.245492121079	415.833561040314	305.507573738782	0.445934870609298	0.00886574569166616	0.143699348231728	Ssx2ip	3	146110397	146145899	+	4200	protein_coding	synovial sarcoma, X 2 interacting protein [Source:MGI Symbol;Acc:MGI:2139150]	-	391	699	381	341	337	362	284	278	306	335	291	354	3.05249780326207	4.93079728050564	3.81390649644675	2.95826077957178	2.84928549457936	3.12724371996243	2.29979556015675	2.2342467556533	2.78673897342584	2.66000118604133	2.27352854912308
ENSMUSG00000020097	3209.59505239204	8802.36642214712	2525.70484615616	2933.70253787248	2909.89617798967	2280.05864071172	2134.90032388723	2399.65232273706	2733.99256156031	2137.83986905325	2170.08262183693	2071.47588741238	3776.88727954486	2274.65726441453	0.731689613905369	0.00893389397390863	0.144501300754579	Sgpl1	10	60934421	60983482	-	6143	protein_coding	sphingosine phosphate lyase 1 [Source:MGI Symbol;Acc:MGI:1261415]	-	3467	9975	2115	2831	2921	2218	2208	2510	2560	2257	2319	1949	18.5055168577798	48.1084817725896	14.4751879880932	16.791547454898	16.8852073574846	13.1003673937285	12.2247147828111	13.7920504347213	15.9398270640554	12.2528567854008	12.3873083059638
ENSMUSG00000036046	2364.38008762886	2578.49771283347	2731.10495657643	1717.1123649787	2304.20741516265	1991.19638731226	1803.25593480511	1626.21856612579	2082.53339650102	2059.22192083374	1439.23547752704	1688.85335305196	2281.08315408206	1783.21977480744	0.355284187389759	0.00896305325017846	0.144821608830389	5031439G07Rik	15	84828137	84872752	-	9604	protein_coding	RIKEN cDNA 5031439G07 gene [Source:MGI Symbol;Acc:MGI:2444899]	-	2554	2922	2287	1657	2313	1937	1865	1701	1950	2174	1538	1589	8.71960144378025	9.01399520366713	10.0117124921073	6.28639584109989	8.5522194837341	7.31778959485756	6.60460526376473	5.97843886680096	7.76616503484308	7.54907433765351	5.25485694531467
ENSMUSG00000033075	548.047381314129	790.668703182338	575.597983852137	568.916528891555	579.787598627179	527.353508875163	418.664782718827	427.34844153923	401.55515747917	527.592736846548	483.800222289649	561.179717061948	598.39528412375	470.023509655895	0.349089404677748	0.00901504325067144	0.145509754407866	Senp1	15	97936625	97991625	-	11873	protein_coding	SUMO1/sentrin specific peptidase 1 [Source:MGI Symbol;Acc:MGI:2445054]	-	592	896	482	549	582	513	433	447	376	557	517	528	1.63489223825788	2.23581983309998	1.70679328921523	1.68478017610538	1.74067572785016	1.56768696118429	1.24035959375843	1.27081603416236	1.21129948458718	1.56451971791638	1.42885049232842
ENSMUSG00000035941	922.052688832555	1561.92366588475	1521.39384113615	957.52071529289	932.441911194225	1023.8676312664	667.156351214759	792.554492250607	912.042831083009	1000.24763035898	772.9574151088	931.048166943687	1153.20007560116	846.001147826641	0.446896603944803	0.0090281075060199	0.145564204166985	Ibtk	9	85569413	85631387	-	8628	protein_coding	inhibitor of Bruton agammaglobulinemia tyrosine kinase [Source:MGI Symbol;Acc:MGI:1918677]	-	996	1770	1274	924	936	996	690	829	854	1056	826	876	3.78509771036485	6.07788379439979	6.20802772429484	3.90205334108352	3.85230858893286	4.18843375459663	2.71993882239542	3.24324699649195	3.78592398282375	4.08169073282077	3.14142448490162
ENSMUSG00000040084	338.826590474614	125.306870370415	225.701284124593	183.42117598143	282.920408952094	199.428032596066	125.696124141911	86.0433103770261	162.330808342643	206.490514600624	140.367569329685	137.106408145817	225.934060416535	143.005789156284	0.65988335070278	0.00905870733374593	0.145758555944962	Bub1b	2	118428692	118472072	+	4275	protein_coding	BUB1B, mitotic checkpoint serine/threonine kinase [Source:MGI Symbol;Acc:MGI:1333889]	-	366	142	189	177	284	194	130	90	152	218	150	129	2.80719679524653	0.984105111928841	1.8587459758895	1.50858058584738	2.35905234555626	1.64652397856314	1.0342544896183	0.710627517890484	1.35997718964573	1.70061767369429	1.1513618986335
ENSMUSG00000078963	5.55453427007563	49.4167939488961	7.16512013093947	7.25394481282492	0	2.05595909892851	1.93378652526017	1.91207356393391	4.27186337743798	0	1.87156759106247	1.06284037322339	11.9077253769441	1.84202190515299	2.70740105483671	0.00908140350486382	1	Hsbp1l1	18	80272973	80290317	-	1251	protein_coding	heat shock factor binding protein 1-like 1 [Source:MGI Symbol;Acc:MGI:1913505]	-	6	56	6	7	0	2	2	2	4	0	2	1	0.157261289980198	1.32623345715408	0.201645389642004	0.203878813475696	0	0.0580062960630046	0.0543741984027332	0.0539645197438817	0.12230010698253	0	0.0524601344701114
ENSMUSG00000024548	140.714868175249	343.270229395011	199.429176977815	134.716117952463	143.452601722189	76.0704866603549	50.2784496567644	74.5708689934226	77.9615066382432	171.443959370243	76.7342712335613	100.969835456222	172.942246813847	91.993148558076	0.911227397636206	0.00908898744985463	0.145937197789959	Setbp1	18	78793595	79152606	-	9953	protein_coding	SET binding protein 1 [Source:MGI Symbol;Acc:MGI:1933199]	-	152	389	167	130	144	74	52	78	73	181	82	95	0.500745986341048	1.15793680899514	0.705434707589647	0.475905490599423	0.513764207240379	0.269761622211222	0.177692673289189	0.264530790091856	0.280538849341042	0.606472180930558	0.270343892003063
ENSMUSG00000020134	612.850281131678	1040.40000117408	629.336384834183	660.108977967068	765.080542518339	637.347320667838	426.399928819868	619.511834714588	503.011912693322	680.092612308476	486.607573676242	518.666102133013	724.187251382198	539.048327390918	0.426411012964754	0.0090915971879783	0.145937197789959	Peli1	11	21041291	21100323	+	6553	protein_coding	pellino 1 [Source:MGI Symbol;Acc:MGI:1914495]	-	662	1179	527	637	768	620	441	648	471	718	520	488	3.31242241295542	5.33043804017464	3.38115284467703	3.54185380816216	4.16175402994129	3.43284322847456	2.2888566985352	3.33787807121458	2.7491908796106	3.65401722197477	2.60387354459766
ENSMUSG00000025574	257.360087846838	241.789313249956	240.031524386472	179.276064659816	324.760751121066	224.099541783208	207.882051465468	181.646988573722	226.408759004213	154.39428385276	124.459244805654	164.740257849625	244.552880507893	176.588597591907	0.471117801867804	0.00909809392514439	0.145937197789959	Tk1	11	117706352	117716918	-	5198	protein_coding	thymidine kinase 1 [Source:MGI Symbol;Acc:MGI:98763]	-	278	274	201	173	326	218	215	190	212	163	133	155	1.75362373049678	1.56172135932272	1.6257514066587	1.21266598276399	2.22708442940166	1.52167766926804	1.40676762922193	1.23382326836507	1.55999692059689	1.04577352481373	0.839599322195128
ENSMUSG00000035004	611.924525419999	208.256488784634	379.751366939792	331.608905729139	441.315990020344	320.729619432848	192.411759263387	185.47113570159	432.526166965596	228.276211095185	131.009731374373	191.31126718021	382.264482721126	226.834378596723	0.753743252471167	0.00912089300379259	0.145990334441297	Igsf6	7	120663290	120673795	-	2175	protein_coding	immunoglobulin superfamily, member 6 [Source:MGI Symbol;Acc:MGI:1891393]	-	661	236	318	320	443	312	199	194	405	241	140	180	9.96483452557976	3.21471150210461	6.14698587100404	5.36070716654125	7.23268950675583	5.2047249261939	3.11181662486484	3.01077359878658	7.122294333705	3.69525229097414	2.11215355197593
ENSMUSG00000033039	1173.85824240932	1574.27786437198	961.320284234379	1012.44344030428	936.426705686508	936.489369561937	880.839762256007	778.213940521103	690.973901300594	930.154519898223	919.875471007204	857.712181191273	1099.13598442807	842.961629362401	0.3832547297431	0.00913459925208989	0.145990334441297	Micall1	15	78993098	79021100	+	8341	protein_coding	microtubule associated monooxygenase, calponin and LIM domain containing -like 1 [Source:MGI Symbol;Acc:MGI:105870]	-	1268	1784	805	977	940	911	911	814	647	982	983	807	4.98458522028353	6.33674150483232	4.05762694053328	4.26783685679961	4.00188946617752	3.96280502202733	3.71467170158598	3.29413894967457	2.96695059619166	3.92626564755965	3.86715972559247
ENSMUSG00000015143	3318.83422637019	4706.06718088327	3003.37952155213	2837.32869964495	3203.77477179554	3336.82161756097	2585.47258427285	2466.57489747475	2677.39037180926	3106.82976096351	2526.61624793433	2854.78924247802	3401.03433630117	2702.94551748879	0.331677496614282	0.00915152542845264	0.145990334441297	Actn1	12	80214321	80307145	-	5533	protein_coding	actinin, alpha 1 [Source:MGI Symbol;Acc:MGI:2137706]	-	3585	5333	2515	2738	3216	3246	2674	2580	2507	3280	2700	2686	21.2449827534292	28.5561842799707	19.1104835183445	18.0303493148089	20.6400491211792	21.2858155352125	16.4369378969514	15.7396353366128	17.3307684178884	19.7696730547005	16.0125245074729
ENSMUSG00000022200	1817.25846202641	2603.20610980792	2132.81742564298	1938.87582068506	1868.86861688073	1969.60881677351	1588.60563050123	1693.14114086348	1749.32805306085	1839.4705474973	1609.54812831372	1786.63466738851	2055.10587530277	1711.12136127085	0.264482099558299	0.00915345125575319	0.145990334441297	Golph3	15	12321536	12351677	+	3257	protein_coding	golgi phosphoprotein 3 [Source:MGI Symbol;Acc:MGI:1913879]	-	1963	2950	1786	1871	1876	1916	1643	1771	1638	1942	1720	1681	19.7619790298405	26.8345007563614	23.0546244520353	20.9308755768365	20.4536317294134	21.3442154028481	17.1569460819142	18.3542411340934	19.2362447514558	19.8846421932348	17.3287566076187
ENSMUSG00000025010	267.54340067531	241.789313249956	241.225711074962	231.089956179994	191.270135629585	196.344093947673	189.511079475497	145.317590858977	140.971491455453	156.288692243591	141.303353125216	240.201924348485	228.210435126247	168.932355251203	0.435343875819561	0.00915799565491952	0.145990334441297	Ccnj	19	40819723	40837016	+	4355	protein_coding	cyclin J [Source:MGI Symbol;Acc:MGI:2443297]	-	289	274	202	223	192	191	196	152	132	165	151	226	2.17589320773636	1.86402471314799	1.95010307130936	1.86572688967542	1.56555534777298	1.59128385621015	1.53069299099387	1.1781241513592	1.15933761574277	1.26351993551871	1.137746482381
ENSMUSG00000078528	0.925755711679272	10.5893129890492	0	5.1813891520178	0.996198623070754	5.13989774732128	0	0	1.0679658443595	0	0	0	3.80542570385638	0.177994307393249	3.91570725891624	0.00915936062520669	1	Gm17068	19	16255161	16256140	+	980	processed_pseudogene	predicted gene 17068 [Source:MGI Symbol;Acc:MGI:4937895]	-	1	12	0	5	1	5	0	0	1	0	0	0	0.0334581417968075	0.362780915794406	0	0.185898247564209	0.0362350847127515	0.185117031568415	0	0	0.0390299576110062	0	0
ENSMUSG00000043940	1559.89837417957	1645.75572704806	1394.81005215622	1716.0760871483	1495.2941332292	1361.04492349067	1122.56307791353	1270.57288323409	1236.7044477683	1418.91188473273	1297.93212440182	1417.82905788	1528.81321620867	1294.08557932174	0.240854895002633	0.00922307491347766	0.14642459136997	Wdfy3	5	101980822	102217787	-	15346	protein_coding	WD repeat and FYVE domain containing 3 [Source:MGI Symbol;Acc:MGI:1096875]	-	1685	1865	1168	1656	1501	1324	1161	1329	1158	1498	1387	1334	3.60024954705254	3.60058364719056	3.19994125170976	3.93184605769587	3.47328847326751	3.13036688128047	2.57310321504992	2.92324635967885	2.88627375832623	3.25538931086084	2.96577350267385
ENSMUSG00000095407	8.33180140511345	28.2381679707978	10.7476801964092	10.3627783040356	6.97339036149528	8.22383639571404	7.73514610104068	0	1.0679658443595	3.78881678166282	5.61470277318741	0	12.1462757722609	3.03443858337507	1.99106272595584	0.00922516781143363	1	Tmem200c	17	69133618	69150134	+	3406	protein_coding	transmembrane protein 200C [Source:MGI Symbol;Acc:MGI:3646281]	-	9	32	9	10	7	8	8	0	1	4	6	0	0.0866414593798715	0.278352160875724	0.111094413876459	0.106976090788564	0.072980822410298	0.085221228860621	0.0798850524977326	0	0.0112299936755097	0.0391653183806402	0.057804722450478
ENSMUSG00000029552	402.703734580483	1202.76946700617	357.061819858483	362.697240641246	411.430031328221	461.562817709451	344.21400149631	345.129278290071	323.593650840927	287.002871210959	321.909625662745	330.543356072473	533.037518520675	325.398797262248	0.712919745965107	0.00927541178650035	0.146458043265662	Tes	6	17065148	17105827	+	6835	protein_coding	testin LIM domain protein [Source:MGI Symbol;Acc:MGI:105081]	-	435	1363	299	350	413	449	356	361	303	303	344	311	2.08678944374236	5.90808315609876	1.8391918154158	1.86578197262689	2.14568956644317	2.38347318890224	1.77146126582646	1.78280692948458	1.69561896313273	1.47839478948616	1.65149261948834
ENSMUSG00000094483	2455.10414737343	3220.03359142003	2233.12910747613	2529.55418401509	2164.73960793275	2412.66800259261	1839.99787878505	2018.19364673225	2005.63985570713	2195.6193249736	1925.84305120328	2314.86633288054	2502.53810680167	2050.02668171364	0.288111460497857	0.00928195235116059	0.146458043265662	Purb	11	6417599	6425917	-	8319	protein_coding	purine rich element binding protein B [Source:MGI Symbol;Acc:MGI:1338779]	-	2652	3649	1870	2441	2173	2347	1903	2111	1878	2318	2058	2178	10.4527433831267	12.9954703139311	9.45071873956835	10.6912386069996	9.27564157941974	10.2363332042132	7.78014776716325	8.56550039520058	8.63472715297516	9.29241550876126	8.1176619113536
[truncated: 1,061 more rows]
[truncated: 1 more columns]
