# Supplementary material for: Loss of CTRP10 results in female obesity with preserved metabolic health
Source: eLife. 2025 Mar 24;13:RP93373. doi: 10.7554/eLife.93373 (PMC11932693; doi:10.7554/eLife.93373)
Supplement: Figure 8—source data 2. [file elife-93373-fig8-data2.xls]

gene_id	KO_gWAT1	KO_gWAT2	KO_gWAT3	KO_gWAT4	KO_gWAT5	KO_gWAT6	WT_gWAT1	WT_gWAT2	WT_gWAT3	WT_gWAT4	WT_gWAT5	WT_gWAT6	KO_gWAT	WT_gWAT	log2FoldChange	pvalue	padj	gene_name	gene_chr	gene_start	gene_end	gene_strand	gene_length	gene_biotype	gene_description	tf_family	KO_gWAT1_count	KO_gWAT2_count	KO_gWAT3_count	KO_gWAT4_count	KO_gWAT5_count	KO_gWAT6_count	WT_gWAT1_count	WT_gWAT2_count	WT_gWAT3_count	WT_gWAT4_count	WT_gWAT5_count	WT_gWAT6_count	KO_gWAT1_fpkm	KO_gWAT2_fpkm	KO_gWAT3_fpkm	KO_gWAT4_fpkm	KO_gWAT5_fpkm	KO_gWAT6_fpkm	WT_gWAT1_fpkm	WT_gWAT2_fpkm	WT_gWAT3_fpkm	WT_gWAT4_fpkm	WT_gWAT5_fpkm
ENSMUSG00000034192	261.988866405234	293.853435446114	288.993178614559	256.996901940083	262.000237867608	297.08608979517	388.691091577294	386.23885991465	431.458201121236	426.241887937067	382.735572372275	398.56513995877	276.819785011461	402.321792146882	-0.53932361540319	1.73606848846746e-09	2.68726041329879e-05	Lsm3	6	91492910	91499607	+	2753	protein_coding	LSM3 homolog, U6 small nuclear RNA and mRNA degradation associated [Source:MGI Symbol;Acc:MGI:1914928]	-	283	333	242	248	263	289	402	404	404	450	409	375	3.37060699089234	3.58366400473261	3.69575787328972	3.28228914551438	3.39238312163624	3.80885184749775	4.966380879973	4.95348422387156	5.61305514614951	5.45120627333884	4.87499090861655
ENSMUSG00000048138	1268.2853250006	673.30381755371	1130.89479399995	1068.40244314607	1295.05820999198	1489.54236717371	2466.54471296935	2281.10376177316	1805.93024281191	2240.13792215814	2634.23138442043	1915.23835254854	1154.24782614434	2223.86439611359	-0.946423159126377	3.55284483070432e-08	0.000274972425672361	Dmrt2	19	25649775	25656355	+	2337	protein_coding	doublesex and mab-3 related transcription factor 2 [Source:MGI Symbol;Acc:MGI:1330307]	DM	1370	763	947	1031	1300	1449	2551	2386	1691	2365	2815	1802	19.2216094036773	9.67286414121057	17.0367057604274	16.0742722613544	19.7533153290738	22.4963532022063	37.1254672094225	34.462545887941	27.6763650636745	33.7488319390831	39.5254115201622
ENSMUSG00000020889	2281.06207357773	1916.6656510179	2211.63374708332	2431.10779012675	2603.06700208388	2390.05245250439	5830.36637365941	5576.56254921326	4106.32867156226	2988.42923653655	6460.65132434765	3167.26431220569	2305.59811939899	4688.2670779208	-1.02399474300761	6.25619876881304e-08	0.000322799002474857	Nr1d1	11	98658758	98666159	-	3077	protein_coding	nuclear receptor subfamily 1, group D, member 1 [Source:MGI Symbol;Acc:MGI:2444210]	THR-like	2464	2172	1852	2346	2613	2325	6030	5833	3845	3155	6904	2980	26.2567579329175	20.913252792854	25.3050874381354	27.7799767962251	30.1555511301044	27.4156097776168	66.65151070474	63.988231983465	47.7961596600691	34.1946514255828	73.6257954574981
ENSMUSG00000031283	1281.24590496411	1089.81679512298	1200.15762193236	1958.56509946273	1438.51081171417	1864.75490272816	2657.02268570747	2587.03553200258	1971.46494868763	2673.01023946312	3765.59399321769	3559.45240992512	1472.17518932075	2868.92996816727	-0.962666135323872	3.09556863956144e-07	0.000958326139435432	Chrdl1	X	142068670	142177258	-	6758	protein_coding	chordin-like 1 [Source:MGI Symbol;Acc:MGI:1933172]	-	1384	1235	1005	1890	1444	1814	2748	2706	1846	2822	4024	3349	6.71499657914264	5.41424660138564	6.25233487112454	10.1900187670443	7.58759885745914	9.7391609754307	13.8298898942438	13.5159082586643	10.4481082738856	13.9259597502733	19.538737493768
ENSMUSG00000049892	1327.53369054808	847.145039123933	1430.63565281091	1598.97669231269	1198.42694355412	1286.00241637978	2402.72975763576	1831.76647424869	2600.49683101537	2483.56940037998	3579.37301790697	1801.51443261364	1281.45340578825	2449.90831896674	-0.935265848268688	5.28402700440866e-07	0.00125224360537648	Rasd1	11	59854007	59855770	-	1611	protein_coding	RAS, dexamethasone-induced 1 [Source:MGI Symbol;Acc:MGI:1270848]	-	1434	960	1198	1543	1203	1251	2485	1916	2435	2622	3825	1695	29.1864654437551	17.6548875222107	31.2647984860017	34.8980975880501	26.5170644141845	28.1750190393849	52.4627478806707	40.1453820007529	57.813276131064	54.2779529932489	77.9098938390963
ENSMUSG00000061780	21500.6764037511	6242.40000704448	16537.0972622083	29473.8140523381	22380.5982659076	24185.2748602455	51483.1986620015	48711.9861147804	44768.0602297057	41107.7148768462	71260.8718134991	44122.7552539957	20053.3101419158	50242.4311584714	-1.32507505571394	9.06920488731704e-07	0.00175477778063476	Cfd	10	79726687	79728489	+	922	protein_coding	complement factor D (adipsin) [Source:MGI Symbol;Acc:MGI:87931]	-	23225	7074	13848	28442	22466	23527	53246	50952	41919	43399	76151	41514	825.947978705247	227.312541066796	631.466753445201	1123.98516227263	865.267098583016	925.844562619502	1964.15722275383	1865.37411209209	1739.0182833339	1569.76671151822	2710.20038868864
ENSMUSG00000075590	1259.95352359549	1191.29771126803	1169.10876803162	1354.41512433745	1265.17225129986	1444.31126699728	1828.39515963349	1916.85374784375	1449.22965079584	1741.90851536948	2218.74337920456	1927.99243702722	1280.70977425496	1847.18714831239	-0.528547538496815	1.08969995470707e-06	0.00187416284432341	Nrbp2	15	75957367	75963476	-	3894	protein_coding	nuclear receptor binding protein 2 [Source:MGI Symbol;Acc:MGI:2385017]	-	1361	1350	979	1307	1270	1405	1891	2005	1357	1839	2371	1814	11.4601439049168	10.2713394880157	10.5701487934798	12.2295649396555	11.5814551703879	13.0913015288419	16.5164141093529	17.3801716063418	13.3293218871527	15.74969310669	19.9798544574501
ENSMUSG00000004947	1106.27807545673	929.212214789064	1019.83543197038	1286.02078753082	918.495130471235	1106.10599522354	1711.40107485525	1600.40557301269	1657.48299044594	1294.82813513327	1573.05256028801	1375.31544295106	1060.99127257363	1535.41429611437	-0.533382347302481	2.03720235615897e-06	0.00264022128260597	Dtx2	5	136023654	136061726	+	7032	protein_coding	deltex 2, E3 ubiquitin ligase [Source:MGI Symbol;Acc:MGI:1921448]	-	1195	1053	854	1241	922	1076	1770	1674	1552	1367	1681	1294	5.57207478075104	4.43648248773321	5.10591246221069	6.43019711952901	4.65594043558784	5.55182615040565	8.56080462864193	8.03548735566864	8.44183793060808	6.48299917203134	7.84414412978995
ENSMUSG00000046056	255.508576423479	282.381679707978	274.66293835268	454.925967547163	315.794963513429	297.08608979517	634.281980285336	594.654878383447	733.692535074973	396.878557879181	718.681954967989	438.953074141259	313.393369223316	586.190496788697	-0.903628902260023	2.43759161849573e-06	0.00264022128260597	Sbsn	7	30450896	30455559	+	3625	protein_coding	suprabasin [Source:MGI Symbol;Acc:MGI:2446326]	-	276	320	230	439	317	289	656	622	687	419	768	413	2.49648501881393	2.6153585101868	2.66755990628477	4.41253208645926	3.10532177016921	2.89262596859622	6.15482926405427	5.79185931477913	7.24891289963753	3.85471546037717	6.95200254821793
ENSMUSG00000031980	1100.72354118665	720.073283255343	1191.79831511293	1639.39152769843	1501.27132496763	2462.01102096689	3690.63158345903	3397.75472311056	3427.10239454962	2079.11320893747	3293.02317647442	2967.4503220397	1435.87816886465	3142.51256809513	-1.13011490168492	2.47215109645912e-06	0.00264022128260597	Agt	8	125283273	125296445	-	1891	protein_coding	angiotensinogen (serpin peptidase inhibitor, clade A, member 8) [Source:MGI Symbol;Acc:MGI:87963]	-	1189	816	998	1582	1507	2395	3817	3554	3209	2195	3519	2792	20.6166557294955	12.7846220140345	22.1887771617542	30.4822006444894	28.2993903801556	45.9532717920917	68.6516235971296	63.4397590865585	64.9086151741114	38.7105471070586	61.0638878142789
ENSMUSG00000050014	130.531555346777	80.3022901669562	120.612855537481	91.1924490755133	139.467807229906	144.94511647446	344.21400149631	308.799880575327	174.078432630598	176.179980347321	291.028760410214	193.436947926656	117.842012305182	247.956333897738	-1.07478341410439	2.55851923503389e-06	0.00264022128260597	Apol10b	15	77468019	77480325	-	2325	protein_coding	apolipoprotein L 10B [Source:MGI Symbol;Acc:MGI:3043522]	-	141	91	101	88	140	141	356	323	163	186	311	182	1.98849291762704	1.15959864052133	1.82638685495748	1.37908515010214	2.13825962261914	2.20038463846225	5.20771516211778	4.68937750246656	2.68156792635791	2.66794148808921	4.38928868324215
ENSMUSG00000053897	241.62224074829	423.572519561967	437.072327987308	393.785575553353	873.666192433051	319.701639883383	1087.75492045885	887.202133665336	855.440641331956	991.722792600243	1394.31785534154	925.73396507757	448.236749361225	1023.69538474592	-1.19165668399874	2.76977206120167e-06	0.00267958135845879	Slc39a8	3	135531040	135594333	+	7664	protein_coding	solute carrier family 39 (metal ion transporter), member 8 [Source:MGI Symbol;Acc:MGI:1914797]	-	261	480	366	380	877	311	1125	928	801	1047	1490	871	1.11663928872487	1.85556000771669	2.00779766818515	1.8065894413599	4.06349242004454	1.47233739252144	4.99249004938979	4.08722090143692	3.9976169266033	4.55593478932249	6.37951239893939
ENSMUSG00000031530	531.383778503902	552.409160928732	416.771154282979	376.168852436492	355.642908436259	418.387676631952	848.932284589215	848.960662386657	515.827502825636	738.81927242425	936.719579326766	649.39546803949	441.793921870053	756.442461598669	-0.77546622561696	3.83285737827083e-06	0.0032960444087919	Dusp4	8	35274451	35287048	+	2740	protein_coding	dual specificity phosphatase 4 [Source:MGI Symbol;Acc:MGI:2442191]	-	574	626	349	363	357	407	878	888	483	780	1001	611	6.86893208888327	6.76882105296692	5.35512016254923	4.82711259770013	4.62671778744643	5.38947293513709	10.8984349075178	10.939514125774	6.74249639985171	9.49358741199628	11.9878204106444
ENSMUSG00000028681	412.887047408955	204.726717788284	443.043261429757	495.340802932902	263.99263511375	398.856065192131	803.488301245601	809.763154326012	603.400702063115	594.844234721063	865.600010866392	570.745280420959	369.80775497763	707.973613940524	-0.938119054254123	8.1053582230627e-06	0.00536263359285352	Ptch2	4	116953272	116973298	+	5974	protein_coding	patched 2 [Source:MGI Symbol;Acc:MGI:1095405]	-	446	232	371	478	265	388	831	847	565	628	925	537	2.44792176373429	1.15056730575572	2.61097700831482	2.91537245025036	1.57520112151014	2.35650820500751	4.73103310593504	4.7857920344039	3.61749037984837	3.50574835646138	5.08081319931798
ENSMUSG00000031574	77.7634797810588	97.0687023996174	89.5640016367433	96.3738382275311	197.247327368009	78.1264457592834	312.306523829517	224.668643762235	166.602671720081	228.276211095185	302.258165956589	175.368661581859	106.023965862041	234.913479657578	-1.14810315387338	8.31469773425186e-06	0.00536263359285352	Star	8	26296583	26306010	+	4113	protein_coding	steroidogenic acute regulatory protein [Source:MGI Symbol;Acc:MGI:102760]	-	84	110	75	93	198	76	323	235	156	241	323	165	0.669650919696862	0.792361267579159	0.766649594098429	0.823864151860055	1.70947139257532	0.670436008325581	2.67093915283098	1.9286116383303	1.45074153162427	1.95409037998268	2.57691756816695
ENSMUSG00000049288	1268.2853250006	1094.22900886841	1230.01228914461	1327.47190074696	1263.17985405372	1360.01694394121	1595.37388333964	1749.54731099953	1486.60845534842	1627.29680772418	1897.76953733734	1537.93002005424	1257.19922029259	1649.08766913389	-0.391988308055714	8.81209502867542e-06	0.00545609675795467	Lix1l	3	96508465	96533487	+	3620	protein_coding	Lix1-like [Source:MGI Symbol;Acc:MGI:3036267]	-	1370	1240	1030	1281	1268	1323	1650	1830	1392	1718	2028	1447	12.4090887227607	10.1485121748012	11.9625291857924	12.8935327086827	12.4384435545452	13.260311387277	15.5022792310776	17.0638941968592	14.7080406007266	15.8270838278221	18.3829875738174
ENSMUSG00000001827	3.70302284671709	9.70687023996174	28.6604805237579	11.3990561344392	15.9391779691321	17.4756523408923	58.0135957578051	22.944882767207	58.7381214397723	72.9347230470093	72.0553522559051	34.0108919431484	14.48071000915	53.1162612018079	-1.89183276187495	9.73410639931296e-06	0.00579516280596021	Folr1	7	101507538	101519995	-	2297	protein_coding	folate receptor 1 (adult) [Source:MGI Symbol;Acc:MGI:95568]	-	4	11	24	11	16	17	60	24	55	77	77	32	0.0570987879161887	0.141879925709755	0.439283208432123	0.174486992489523	0.247351383672592	0.268528493333026	0.888403859840914	0.352684096819831	0.91585316292261	1.11793368841352	1.09998419092347
ENSMUSG00000030494	71.2831897993039	112.070229134104	137.33146917634	81.8659486018813	100.616060930146	81.2103844076762	229.15370324333	139.581370167176	153.787081587767	204.596106209792	290.092976614683	154.111854117391	97.3962136749085	195.220515323357	-1.00629918628488	1.05011719204976e-05	0.00598629042523927	Rhpn2	7	35033595	35091714	+	6304	protein_coding	rhophilin, Rho GTPase binding protein 2 [Source:MGI Symbol;Acc:MGI:1289234]	-	77	127	115	79	101	79	237	146	144	216	310	145	0.400499901647699	0.596865915553244	0.766965788410715	0.456606672792547	0.568932215239236	0.454687835787649	1.27865188466301	0.781757905547352	0.873716309972271	1.14267798506359	1.61362347310072
ENSMUSG00000011263	165.71027239059	197.667175795584	224.507097436103	160.623063712552	238.09147091391	191.204196200352	459.27429974929	287.767071372054	295.82653888758	353.307164890058	433.267897330962	234.887722482369	196.300546074848	344.055115785386	-0.811049440875984	1.1823563837605e-05	0.00631092912559612	Exoc3l2	7	19197256	19230687	+	4016	protein_coding	exocyst complex component 3-like 2 [Source:MGI Symbol;Acc:MGI:1921713]	-	179	224	188	155	239	186	475	301	277	373	463	221	1.46146096464043	1.65250802280852	1.96815139023587	1.4062721018428	2.11329221648921	1.68043488616986	4.02272261527193	2.52992951619502	2.63821521242125	3.09742957873903	3.78306671648863
ENSMUSG00000009633	3304.947890695	1723.41068896775	2744.24101014982	3839.40936164519	2512.41292738444	3549.61338430007	5228.9587643035	5467.57435606902	4824.00171897184	4345.77284856726	4849.23162844286	4354.45700909622	2945.67254385705	4844.99938757512	-0.717997020055173	2.32633450787761e-05	0.0103160025171203	G0s2	1	192954469	192955525	-	871	protein_coding	G0/G1 switch gene 2 [Source:MGI Symbol;Acc:MGI:1316737]	-	3570	1953	2298	3705	2522	3453	5408	5719	4517	4588	5182	4097	134.393404007245	66.4313916930296	110.924179650221	154.989195655772	102.821109038631	143.840396740671	211.173155492215	221.634605974449	198.360909481443	175.667559519996	195.225240784713
ENSMUSG00000002985	42924.5150834328	25660.5527007134	32420.9744058126	45533.011590102	46947.8525094554	52002.4014687483	83702.0159593612	67663.5032437113	67750.685200322	52602.9849924112	70501.9511553232	62018.8614583311	40914.8846263774	67373.3336682433	-0.7195540153016	2.32830952462577e-05	0.0103160025171203	Apoe	7	19430034	19433113	-	2138	protein_coding	apolipoprotein E [Source:MGI Symbol;Acc:MGI:88057]	-	46367	29079	27149	43939	47127	50587	86568	70775	63439	55535	75340	58352	711.097561963855	402.959156742198	533.876116691756	748.813792116868	782.739859921741	858.486900882357	1377.11390897266	1117.39778881581	1134.93968721559	866.254271170687	1156.31092381986
ENSMUSG00000039787	612.850281131678	498.580153234398	544.5491299514	535.755638318641	725.232597595509	600.340056887125	797.68694166982	811.675227889946	740.10033014113	867.639043000786	983.508769103328	747.176782376041	586.217976186458	824.631182363509	-0.492652322920531	2.47689798979585e-05	0.0103160025171203	Cercam	2	29759176	29772852	+	3383	protein_coding	cerebral endothelial cell adhesion molecule [Source:MGI Symbol;Acc:MGI:2139134]	-	662	565	456	517	728	584	825	849	693	916	1051	703	6.41628852264169	4.94806860467442	5.66705204422204	5.56826521495018	7.64160769656087	6.26344543347534	8.29415471718902	8.47112953819938	7.83529571739248	9.02983447786623	10.1943005115928
ENSMUSG00000002833	1402.5199031941	1280.42442892586	1246.73090278347	1349.23373518544	1310.99738796111	1548.13720149317	1814.85865395667	2251.46662153218	1959.71732439967	1564.78133082675	2040.94445805362	1583.63215610285	1356.34059325719	1869.23342414529	-0.462736718341374	2.64994310726543e-05	0.0105175562454773	Hdgfl2	17	56386634	56407607	+	4876	protein_coding	HDGF like 2 [Source:MGI Symbol;Acc:MGI:1194492]	-	1515	1451	1044	1302	1316	1506	1877	2355	1835	1652	2181	1490	10.1877159814848	8.81643434921605	9.0018372733662	9.72923412477558	9.58401641762537	11.2063381686297	13.092444972602	16.3028241837622	14.394498107439	11.2988088041514	14.6773848597642
ENSMUSG00000028266	2443.99507883328	2145.21832303154	2218.79886721426	2064.26543816389	1825.03587746562	1937.74145074012	2680.2281240106	3348.04081044828	3316.03394673623	2986.53482814572	2402.15700312868	2683.67194238905	2105.84250590812	2902.77777580976	-0.462947820637594	2.79623287244014e-05	0.0108207221581252	Lmo4	3	143894291	143910981	-	3530	protein_coding	LIM domain only 4 [Source:MGI Symbol;Acc:MGI:109360]	-	2640	2431	1858	1992	1832	1885	2772	3502	3105	3153	2567	2525	24.5220692511899	20.4032577471737	22.1291819913838	20.5610834541046	18.4291846146984	19.3748834230217	26.7078360826407	33.4870635873917	33.644265726496	29.7876045040555	23.8620568903902
ENSMUSG00000073680	109.239173978154	52.0641221961584	75.2337613748644	90.1561712451097	73.7186981072358	78.1264457592834	181.775933374456	229.44882767207	103.592686902871	96.6148279324019	290.092976614683	172.180140462189	79.7563954434676	178.950898826445	-1.16680166097961	3.3682390597369e-05	0.0117946421255191	Tmem88b	4	155866048	155870331	-	3471	protein_coding	transmembrane protein 88B [Source:MGI Symbol;Acc:MGI:2444329]	-	118	59	63	87	74	76	188	240	97	102	310	162	1.11469303295385	0.503601088812844	0.763097958986616	0.913263300911812	0.757063769337003	0.794440594135152	1.84214332669865	2.33395381848214	1.06891033434234	0.980013079030177	2.93064891225208
ENSMUSG00000103009	67.5801669525869	57.358778690683	48.9616542280864	50.7776136897744	62.7605132534575	64.7627116162481	93.7886464751182	108.988193144233	107.864550280309	79.5651524149192	112.294055463748	81.8387087382008	58.7002397384727	97.3898844194214	-0.727300266270677	3.40329583568761e-05	0.0117946421255191	ENSMUSG00000103009	2	129039169	129041114	-	1946	TEC	TEC	-	73	65	41	49	63	63	97	114	101	84	120	77	1.23000794663084	0.989600219942774	0.885799390213089	0.91745466064063	1.14961671642614	1.17462749527584	1.69530982877093	1.97741418775795	1.98519280798427	1.43953677414885	2.02346232956144
ENSMUSG00000024371	278.652469215461	314.149618675125	363.032753300933	373.060018945282	749.141364549207	376.240515103918	915.647919710691	796.378639378475	584.177316864644	791.86270736753	1279.2164484912	621.761618335681	409.046123298321	831.50744169137	-1.02382799905126	3.95228343731448e-05	0.0128243561691044	C2	17	35081580	35117241	-	3872	protein_coding	complement component 2 (within H-2S) [Source:MGI Symbol;Acc:MGI:88226]	-	301	356	304	360	752	366	947	833	547	836	1367	585	2.54893663926195	2.72397998240256	3.30090169862314	3.3876498832982	6.89664463582369	3.42963723569004	8.31830445830616	7.26181671336047	5.40351215830475	7.20041026614986	11.5848357153439
ENSMUSG00000040035	61.0998769708319	53.8290076943333	66.874454555435	128.498450970041	91.6502733225093	168.588646112138	266.862540485903	375.722455313014	65.1459165059292	214.068148163949	705.580981830551	269.96145479874	95.0901182708815	316.223582849681	-1.7344958068666	4.10261746250781e-05	0.0129600848371752	Disp2	2	118610200	118641774	+	9555	protein_coding	dispatched RND tramsporter family member 2 [Source:MGI Symbol;Acc:MGI:2388733]	-	66	61	56	124	92	164	276	393	61	226	754	254	0.226485882932236	0.189142186867169	0.246406234375723	0.47284887585563	0.341910542930578	0.622752680558361	0.982423115002727	1.38834528416752	0.244187427104757	0.78879484080084	2.58938941284513
ENSMUSG00000049807	2715.2415023553	1899.89923878524	2331.05241593231	2410.38223351868	2411.79686645429	2786.8525585976	3466.31234652885	3744.79607496457	3337.39326362342	2713.740019866	3817.06210197191	3209.77792713463	2425.87080260724	3381.51362234823	-0.479258997053473	4.21502757633493e-05	0.0130488823708177	Arhgap23	11	97306359	97393228	+	6637	protein_coding	Rho GTPase activating protein 23 [Source:MGI Symbol;Acc:MGI:3697726]	-	2933	2153	1952	2326	2421	2711	3585	3917	3125	2865	4079	3020	14.4899917571547	9.61084281893487	12.3652343560612	12.7693637895936	12.9532375000422	14.820407627854	18.3711999467773	19.9212866370211	18.0095291824177	14.3959099807435	20.1668747565153
ENSMUSG00000031661	1024.81157282895	988.335878977922	785.774841026362	1069.43872097647	814.890473671877	1021.81167216747	1234.72269637862	1426.4068786947	1255.92783296677	1187.79406105129	1270.79439433142	1203.13530248887	950.84385994151	1263.13019431861	-0.409178272584734	5.6776150758477e-05	0.0166261686483508	Nkd1	8	89247982	89321512	+	4558	protein_coding	naked cuticle 1 [Source:MGI Symbol;Acc:MGI:2135954]	-	1107	1120	658	1032	818	994	1277	1492	1176	1254	1358	1132	7.9634488173946	7.28002656823059	6.06940235655012	8.24967317492491	6.37285943596536	7.91251438312526	9.52876810571777	11.049182139732	9.86863658348672	9.17507302014006	9.77647204098558
ENSMUSG00000047182	1238.66114222687	490.638168492611	964.902844299848	1062.18477616365	1259.19505956143	1018.72773351908	1976.32982881589	2130.04995022238	1746.12415552778	1415.12306795106	1858.46661792503	1422.08041937289	1005.71828737725	1758.02900663584	-0.805929850335026	5.69278983372694e-05	0.0166261686483508	Irs3	5	137641293	137643976	-	2338	protein_coding	insulin receptor substrate 3 [Source:MGI Symbol;Acc:MGI:1194882]	-	1338	556	808	1025	1264	991	2044	2228	1635	1494	1986	1338	18.7646081478383	7.04562537061791	14.5298526527841	15.9738913326132	19.1980856011033	15.3791239280251	29.7342210822324	32.1666852944183	26.7483751411956	21.3104393883944	27.8734965032312
ENSMUSG00000044405	1429.3668188328	855.08702386572	1477.20893366202	1851.82848293116	1139.65122479294	1729.06160219888	2393.06082500946	2273.45546751742	2413.60280825246	2049.74987887959	2156.9816486995	2104.42393898231	1413.70068104725	2231.87909455679	-0.659081316585084	6.59720603761488e-05	0.0182353843314716	Adig	2	158344532	158350118	+	810	protein_coding	adipogenin [Source:MGI Symbol;Acc:MGI:2675492]	-	1544	969	1237	1787	1144	1682	2475	2378	2260	2164	2305	1980	62.5014611303523	35.4427997177658	64.2065059837316	80.3842382788388	50.1529360162468	75.3430889274353	103.922686697224	99.0974460287897	106.720432243033	89.0960706824854	93.3775821308408
ENSMUSG00000019082	1415.48048315761	1318.36946713662	1453.32519989222	1496.38518710274	1144.6322179083	1405.24804411764	2079.78740791731	1931.19429957325	1892.43547620503	1565.72853502216	1866.88867208481	1575.12943311706	1372.24009988585	1818.5273039866	-0.406511988723397	7.63061349821746e-05	0.0195838027349048	Slc25a22	7	141009657	141017805	-	5992	protein_coding	solute carrier family 25 (mitochondrial carrier, glutamate), member 22 [Source:MGI Symbol;Acc:MGI:1915517]	-	1529	1494	1217	1444	1149	1367	2151	2020	1772	1653	1995	1482	8.3668806460568	7.38699925501927	8.53912025567681	8.78065180550948	6.80931743795935	8.27749941625311	12.2092443972057	11.3792907779693	11.3113923880122	9.19999015314475	10.9251600720217
ENSMUSG00000055862	308.276651989198	321.209160667825	244.808271140432	216.582066554344	262.000237867608	366.988699158739	510.519642668685	480.886501329379	468.837005673819	348.57114391298	454.79092462818	369.868449881739	286.644181229691	438.912278015797	-0.613623251260555	7.80941831915545e-05	0.0195838027349048	Izumo4	10	80538018	80541207	+	2799	protein_coding	IZUMO family member 4 [Source:MGI Symbol;Acc:MGI:1918814]	-	333	364	205	209	263	357	528	503	439	368	486	348	3.90093961913904	3.85290009176434	3.07925261406694	2.72066302723125	3.33663120180942	4.6277273786728	6.4158057382209	6.06597640986009	5.99909552104577	4.38461266352639	5.69757544050467
ENSMUSG00000028871	106.461906843116	186.195420057448	249.585017894391	191.711398624659	614.654550434655	133.637341430353	839.263351962914	517.215899044123	469.904971518178	773.865827654631	1282.02379987779	376.245492121079	247.040939214104	709.753223696453	-1.52294255871058	7.84414865019766e-05	0.0195838027349048	Rspo1	4	124880223	124902892	+	1938	protein_coding	R-spondin 1 [Source:MGI Symbol;Acc:MGI:2183426]	-	115	211	209	185	617	130	868	541	440	817	1370	354	1.94568244607854	3.22565521878084	4.534055893568	3.47815813038092	11.305421218995	2.43384002289124	15.2330242701701	9.42278154849883	8.68406487196382	14.0590053906662	23.1965558989396
ENSMUSG00000000142	213.849569397912	326.503817162349	331.983899400195	391.713019892546	314.798764890358	285.778314751063	594.639356517502	426.392404757263	527.575127113591	410.139416615	799.159361383675	411.319224437451	310.771230915737	528.204148470747	-0.766018466833375	9.22127492036131e-05	0.0223125698684521	Axin2	11	108811175	108841609	+	5506	protein_coding	axin 2 [Source:MGI Symbol;Acc:MGI:1270862]	-	231	370	278	378	316	278	615	446	494	433	854	387	1.37563642207797	1.99092444707367	2.12277001812922	2.50142196976701	2.0380096320096	1.831939123883	3.79891074774054	2.73422520278059	3.43174411163101	2.62263590706191	5.08953818576838
ENSMUSG00000078350	267.54340067531	315.9145041733	292.575738680028	304.665682138647	385.528867128382	281.666396553206	447.671580597729	499.051200186751	506.215810226401	346.676735522148	525.910493088554	380.496853613973	307.982431558145	451.003778872593	-0.550201188014407	9.22543104581003e-05	0.0223125698684521	Smim1	4	154104927	154110687	-	5761	protein_coding	small integral membrane protein 1 [Source:MGI Symbol;Acc:MGI:1916109]	-	289	358	245	294	387	274	463	522	474	366	562	358	1.64485591385034	1.84108743414496	1.78797962443806	1.85943423323034	2.38543972021491	1.72565961870338	2.73340067518159	3.05849840411293	3.14705709242573	2.11870027911962	3.20106987162172
ENSMUSG00000059824	1180.33853239107	2170.80916275508	1572.74386874121	1585.50508051745	1482.34355112928	1246.93919350014	3231.35728370974	2577.47516418291	2395.44738889835	1964.50150129217	4034.16394253515	1849.34224940869	1539.77989817237	2675.3812550045	-0.797016060275466	9.41277261599117e-05	0.022415431895835	Dbp	7	45354512	45359627	+	2993	protein_coding	D site albumin promoter binding protein [Source:MGI Symbol;Acc:MGI:94866]	TF_bZIP	1275	2460	1317	1530	1488	1213	3342	2696	2243	2074	4311	1740	13.9679078433381	24.3510477725012	18.500071816255	18.6258491411811	17.6543434452131	14.7047123358929	37.9769349145473	30.4052656000854	28.6646545349339	23.1093829197169	47.2637329210681
ENSMUSG00000040213	274.949446368744	209.138931533721	259.138511402311	272.541069396136	277.93941583674	271.386601058563	528.890614658657	475.150280637577	349.224831105555	312.577384487183	366.827247848244	336.920398311814	260.848995932703	394.931792841505	-0.599325038585964	0.000105525718078428	0.0238278681152175	Kyat3	3	142406812	142452631	+	9518	protein_coding	kynurenine aminotransferase 3 [Source:MGI Symbol;Acc:MGI:2677849]	-	297	237	217	263	279	264	547	497	327	330	392	317	1.02314842943673	0.737720595209154	0.958535914231734	1.00679584633745	1.04091162661909	1.00637693648625	1.9546176110735	1.76256977606636	1.31409331960738	1.15625747408783	1.35144096780137
ENSMUSG00000067787	2371.78613332229	1808.12519288015	1942.94174217309	2575.15040855285	2126.88406025606	2316.03792494297	3008.00494004219	3312.6674495155	2798.07051222188	2483.56940037998	3065.62771416033	2904.74274001952	2190.1542436879	2928.7804593899	-0.419297246345142	0.000109405513040891	0.0238278681152175	Blcap	2	157398282	157413194	-	3043	protein_coding	bladder cancer associated protein [Source:MGI Symbol;Acc:MGI:1858907]	-	2562	2049	1627	2485	2135	2253	3111	3465	2620	2622	3276	2733	27.6061005907829	19.949373823351	22.4791536988374	29.7547158917594	24.9144488151462	26.8634438830869	34.7710848126618	38.4358878083471	32.9324085317186	28.7353868787788	35.3263407912636
ENSMUSG00000032392	228.66166078478	178.253435315661	255.555951336841	315.028460442682	298.859586921226	363.904760510346	429.300608607758	505.74345766052	391.943464879935	358.043185867137	510.002168564523	415.570585930344	273.37730921859	435.100578585036	-0.671794402435755	0.000109690425316055	0.0238278681152175	Parp16	9	65102635	65146506	+	3886	protein_coding	poly (ADP-ribose) polymerase family, member 16 [Source:MGI Symbol;Acc:MGI:2446133]	-	247	202	214	304	300	354	444	529	367	378	545	391	2.08411677903634	1.54006068988378	2.31528966557812	2.85037601206018	2.7414088794516	3.30523935109185	3.88597815975396	4.59503164070848	3.61233004487249	3.24395870592422	4.60204032180258
ENSMUSG00000030315	719.312187974794	670.656489306447	622.171264703244	578.243029365187	723.240200349367	562.304813556948	978.495981781646	867.125361244029	870.392163152989	761.552173114227	868.407362252986	766.307909094062	645.987997542665	852.046825106657	-0.398871552049889	0.000112221944386456	0.0238278681152175	Vgll4	6	114837589	114946955	-	5396	protein_coding	vestigial like family member 4 [Source:MGI Symbol;Acc:MGI:2652840]	-	777	760	521	558	726	547	1012	907	815	804	928	721	4.72146713354282	4.17283213002955	4.05938402682106	3.76785017412944	4.77771276342261	3.67805173990232	6.37864970980737	5.67376020005871	5.77709917418656	4.96901630009203	5.64329493978109
ENSMUSG00000029314	1642.29063251903	1083.63969587936	1385.2565586483	2317.11722878236	1493.30173598306	1658.13101328584	2457.84267360568	2782.06703552384	2271.56335095265	1885.88355307267	3760.91507424003	2788.89313933817	1596.62281084966	2657.86080445551	-0.735351615511494	0.000120707092087204	0.0239541676720235	Gpat3	5	100993579	101046968	+	3502	protein_coding	glycerol-3-phosphate acyltransferase 3 [Source:MGI Symbol;Acc:MGI:3603816]	-	1774	1228	1160	2236	1499	1613	2542	2910	2127	1991	4019	2624	16.6098368579628	10.3889459666767	13.9263146598558	23.2641411720446	15.1999040961525	16.7117016836926	24.6876405820995	28.0486832268453	23.2314064654021	18.9601352897831	37.6581150520642
ENSMUSG00000097187	18.5151142335854	19.4137404799235	19.1069870158386	27.9795014208961	28.8897600690519	45.2311001764272	67.682528384106	71.7027586475217	44.8545654630988	54.9378433341109	59.890162913999	40.3879341824887	26.5227005659538	56.5759654875542	-1.09683997718374	0.000122444327063285	0.0239913384634506	Gm19426	2	84572513	84573999	-	726	protein_coding	predicted gene, 19426 [Source:MGI Symbol;Acc:MGI:5011611]	-	20	22	16	27	29	44	70	75	42	58	64	38	0.90327765732428	0.897791155248783	0.926568897859126	1.35505995331928	1.41845882580771	2.19896595075208	3.27930341193344	3.48706684915269	2.21277280340085	2.66426663755465	2.89267782797176
ENSMUSG00000026819	1033.14337423407	798.610687924125	1448.54845313826	1277.73056488759	1111.75766334696	1455.61904204139	2044.0123572	2023.92986742405	1705.54145344211	1471.95531967601	2061.53170155531	1552.80978527937	1187.5682975954	1809.96341409614	-0.608582533411164	0.000129729105344426	0.0240834347295873	Slc25a25	2	32304499	32341457	-	7862	protein_coding	solute carrier family 25 (mitochondrial carrier, phosphate carrier), member 25 [Source:MGI Symbol;Acc:MGI:1915913]	-	1116	905	1213	1233	1116	1416	2114	2117	1597	1554	2203	1461	4.65435010434145	3.41039593633998	6.48667467782422	5.71427851594344	5.04064963732409	6.53480545323985	9.14517720266128	9.08915373063755	7.76955297108642	6.5918040455524	9.19471285762573
ENSMUSG00000034842	3625.25936693603	2833.52366731974	3481.05419694809	4074.6444291468	2853.11285647464	3773.71292608328	5108.09710647474	5497.21149631	3996.32818959323	3952.68310746974	5897.30947943784	5098.44527035259	3440.21790715143	4925.01244160636	-0.517739906014986	0.000131518073476125	0.0240834347295873	Art3	5	92479686	92562487	+	3932	protein_coding	ADP-ribosyltransferase 3 [Source:MGI Symbol;Acc:MGI:1202729]	-	3916	3211	2915	3932	2864	3671	5283	5750	3742	4173	6302	4797	32.6555548348861	24.1944669846457	31.1687514758756	36.436056522585	25.8651416492812	33.8745335925686	45.6969572217969	49.3616838310881	36.4010934264439	35.3933107508783	52.5922320772804
ENSMUSG00000023951	3623.40785551267	2410.83359050686	2682.14330234834	3987.5970913929	3878.20123961444	3083.93864839277	6075.95726236745	6762.04815885228	4454.48553682346	3494.23627688854	7431.99490410907	4592.53325269826	3277.686954628	5468.54256528984	-0.738503015952519	0.000132985144294141	0.0240834347295873	Vegfa	17	46327919	46343295	-	4285	protein_coding	vascular endothelial growth factor A [Source:MGI Symbol;Acc:MGI:103178]	-	3914	2732	2246	3848	3893	3000	6284	7073	4171	3689	7942	4321	29.9500731978648	18.8894420986253	22.0370411110487	32.7201739787415	32.2618252254391	25.4022904462609	49.8775981232477	55.7170946597133	37.2317559233598	28.7107238902016	60.8185091411894
ENSMUSG00000049521	3803.93021929013	2115.21526956257	2805.1445312628	3633.19007339488	3477.72939314	4024.53993615256	5267.6344948087	5635.83682969521	4760.99173415463	4171.48727661077	6189.27402364359	4381.0280184268	3309.95823713382	5067.70872955662	-0.614572524830183	0.000137960291739819	0.0240834347295873	Cdc42ep1	15	78726824	78735097	+	2560	protein_coding	CDC42 effector protein (Rho GTPase binding) 1 [Source:MGI Symbol;Acc:MGI:1929763]	-	4109	2397	2349	3506	3491	3915	5448	5895	4458	4404	6614	4122	52.6288728711799	27.7406945981773	38.577795596133	49.9003180344465	48.4245105928012	55.4873839858234	72.3797894053733	77.7283546301989	66.6076718786205	57.3711636403559	84.7775650509827
ENSMUSG00000020133	698.94556231785	554.174046426906	597.093344244956	643.528532680611	643.544310503707	801.824048582119	868.270149841816	836.532184221087	941.945874725075	793.757115758361	937.655363122297	819.449927755231	656.518307459358	866.268435903978	-0.399969580742259	0.000138473137213856	0.0240834347295873	2310011J03Rik	10	80154088	80156371	-	1649	protein_coding	RIKEN cDNA 2310011J03 gene [Source:MGI Symbol;Acc:MGI:1913624]	-	755	628	500	621	646	780	898	875	882	838	1002	771	15.0125403974881	11.2830951494092	12.7480484355239	13.7215228020166	13.9112840691017	17.1623358315217	18.5214874885487	17.9111317236648	20.458419745694	16.9476574213065	19.9390186411624
ENSMUSG00000030208	9389.94018356285	5056.39695227098	9274.05382281265	9479.86959253177	8772.52507476106	9663.007764964	11331.9890380246	15508.828677068	13326.0778059178	10260.1158447429	14680.576184294	14115.5829967798	8605.96556515055	13203.8617578045	-0.617594680373184	0.000148121739528525	0.0252226233098274	Emp1	6	135339543	135360171	+	5935	protein_coding	epithelial membrane protein 1 [Source:MGI Symbol;Acc:MGI:107941]	-	10143	5730	7766	9148	8806	9400	11720	16222	12478	10832	15688	13281	56.0368346419744	28.6037623497881	55.0137208100453	56.1612544344748	52.6881942478315	57.4658161687697	67.1625334629589	92.2612436011665	80.4171010697107	60.8659271250681	86.7368350082942
ENSMUSG00000085211	130.531555346777	73.2427481742567	119.418668848991	210.364399571923	109.581848537783	124.385525485175	278.465259637464	316.448174831063	270.195358622952	144.922241898603	251.725840997902	205.128192032114	127.920790994151	244.480844670016	-0.93573573461198	0.00014828210615636	0.0252226233098274	B430219N15Rik	10	7655949	7657121	+	1173	lncRNA	RIKEN cDNA B430219N15 gene [Source:MGI Symbol;Acc:MGI:3697426]	-	141	83	100	203	110	121	288	331	253	153	269	193	3.94138621780295	2.09637678962184	3.58423390795889	6.30564320041327	3.33004444333726	3.74274127934914	8.35054185597781	9.5250137681442	8.24986162836563	4.34990460014545	7.52507757533991
ENSMUSG00000040649	2.77726713503782	2.64732824726229	9.55349350791929	4.14511132161424	13.9467807229906	8.22383639571404	29.0067978789025	14.3405517295043	13.8835559766734	35.9937594257968	39.3029194123119	19.131126718021	6.88230288842304	25.2764518568683	-1.89483955187293	0.000160690014627893	0.0268457759433749	Rimklb	6	122424255	122475720	-	5622	protein_coding	ribosomal modification protein rimK-like family member B [Source:MGI Symbol;Acc:MGI:1918325]	-	3	3	8	4	14	8	30	15	13	38	42	18	0.0174967870655664	0.0158095560956296	0.0598264870015764	0.0259239107240022	0.0884285596333956	0.0516299369440191	0.181489120068888	0.0900608513868677	0.0884456883607647	0.225413057069081	0.245140553657826
ENSMUSG00000029752	704.500096587926	635.35877934295	604.258464375895	895.344045468676	617.643146303867	639.403279766767	913.71413318543	1217.03482344394	891.751480040179	905.527210817414	1120.13320325089	814.135725889114	682.751301974347	977.049429437827	-0.517268756413828	0.000162653979818885	0.0268457759433749	Asns	6	7675169	7693254	-	2735	protein_coding	asparagine synthetase [Source:MGI Symbol;Acc:MGI:1350929]	-	761	720	506	864	620	622	945	1273	835	956	1197	766	9.12336855181832	7.79945807996749	7.77835109785048	11.5103301043925	8.04988572996994	8.25154937936696	11.7515366509542	15.7111039992844	11.6775920705983	11.6570021143203	14.3612926840704
ENSMUSG00000036244	8.33180140511345	3.52977099634972	2.38837337697982	9.32650047363204	1.99239724614151	13.3637341430353	30.9405844041627	19.1207356393391	32.0389753307849	18.9440839083141	16.8441083195622	18.0682863447976	6.48876294020864	22.6594623244934	-1.79970337432048	0.000179663835806623	1	Tbc1d21	9	58266987	58277738	-	1332	protein_coding	TBC1 domain family, member 21 [Source:MGI Symbol;Acc:MGI:1921536]	-	9	4	2	9	2	13	32	20	30	20	18	17	0.221547155141023	0.0889702946642938	0.0631277233338706	0.246189571098548	0.0533188934211658	0.354112760087329	0.817082548970802	0.506828935432403	0.861472037360047	0.500739768785513	0.443429920419658
ENSMUSG00000028671	566.562495547714	396.216794340256	343.925766285094	461.143634529584	387.521264374523	432.779390324452	732.905093073604	879.5538394096	697.381696366751	503.912631961155	637.268764756771	521.854623252683	431.358224233604	662.146108136761	-0.617687193410469	0.000192209833067985	0.0296534979321011	Gale	4	135691038	135695489	+	2370	protein_coding	galactose-4-epimerase, UDP [Source:MGI Symbol;Acc:MGI:1921496]	-	612	449	288	445	389	421	758	920	653	532	681	491	8.46702747850349	5.61289938705536	5.10903053047386	6.84136926267947	5.82849746590511	6.44519703666639	10.8777992888141	13.1031318699638	10.5387472884335	7.48599615856256	9.42877949773344
ENSMUSG00000028789	457.32332156956	384.74503860212	400.05254064412	435.236688769495	453.270373497193	610.619852381768	621.712367871145	574.578105962141	636.507643238259	727.452822079262	568.956547682991	695.097604088095	456.874635910709	637.384181820315	-0.48026034112909	0.000193251199255076	0.0296534979321011	Azin2	4	128824026	128856235	-	4024	protein_coding	antizyme inhibitor 2 [Source:MGI Symbol;Acc:MGI:2442093]	-	494	436	335	420	455	594	643	601	596	768	608	654	4.02528717859604	3.21009422010922	3.50010595253973	3.80296812611474	4.01521477967592	5.35588103462256	5.43467005166126	5.04141129895095	5.66516342978045	6.3648703493182	4.95795203268421
ENSMUSG00000038976	5379.56644056825	3468.88244666269	4434.01517436304	4938.90013970337	5235.02376423681	5227.27600902574	7484.72074601949	7216.16563028659	6254.00798456921	5415.16638519159	8184.36507571618	6106.01794416836	4780.61066242665	6776.74062765857	-0.50344794824811	0.000197118558372514	0.0296534979321011	Ppp1r9b	11	94881861	94897725	+	5083	protein_coding	protein phosphatase 1, regulatory subunit 9B [Source:MGI Symbol;Acc:MGI:2387581]	-	5811	3931	3713	4766	5255	5085	7741	7548	5856	5717	8746	5745	37.485098709743	22.912485152929	30.7113703851955	34.1637311403975	36.7119934609874	36.2972143779219	51.7961093807085	50.1241951582285	44.0661505281628	37.5089058808923	56.4606764145749
ENSMUSG00000051041	525.829244233826	390.922137845732	567.238677032708	553.372361435501	700.32763201874	569.500670403198	710.666548033112	834.620110657153	740.10033014113	822.173241620832	917.06811962061	686.594881102308	551.198453828284	785.203871862524	-0.511467559462096	0.000197319612830701	0.0296534979321011	Olfml1	7	107166653	107190301	+	1685	protein_coding	olfactomedin-like 1 [Source:MGI Symbol;Acc:MGI:2679264]	-	568	443	475	534	703	554	735	873	693	868	980	646	11.0529021066914	7.78920409411392	11.8519022413472	11.547094470659	14.8153111347199	11.9292271547922	14.8356854060348	17.4883956071951	15.7310417875008	17.1793264960047	19.084592183284
ENSMUSG00000026773	19320.5217027464	11117.8961957525	18300.9110011079	23237.4940689694	15712.0446830719	16707.7516174425	24254.5174930757	30249.9598182165	24793.89504265	21560.2618960523	33076.214036847	25355.1199436171	17399.4365448485	26548.3280384098	-0.609603981977948	0.000222667780725879	0.0325157979043008	Pfkfb3	2	11476244	11558888	-	7561	protein_coding	6-phosphofructo-2-kinase/fructose-2,6-biphosphatase 3 [Source:MGI Symbol;Acc:MGI:2181202]	-	20870	12599	15325	22424	15772	16253	25085	31641	23216	22762	35346	23856	90.5046939443705	49.3680644417829	85.2149122895098	108.06006235451	74.0735036328166	77.9932012114753	112.837913995016	141.255898881723	117.444399679828	100.396250747068	153.397311674294
ENSMUSG00000036098	118.496731094947	181.783206312011	304.517605564927	127.462173139638	468.213352843254	148.029055122853	685.52732320473	367.118124275311	306.506197331175	932.048928289054	1078.02293245198	291.218262263208	224.750354012938	610.073627969244	-1.44136305004059	0.000227695082223076	0.0326108493318138	Myrf	19	10185636	10218112	-	8562	protein_coding	myelin regulatory factor [Source:MGI Symbol;Acc:MGI:2684944]	NDT80/PhoG	128	206	255	123	470	144	709	384	287	984	1152	274	0.490187959237507	0.712822269724506	1.25215852064836	0.523433187605461	1.94929689543253	0.610224608617957	2.81637962164739	1.51388062676039	1.28212635805555	3.83271201862851	4.41503315299404
ENSMUSG00000086432	55.5453427007563	28.2381679707978	63.2918944899653	75.6482816194599	33.8707531844056	101.769975396961	208.848944728098	96.5597149786626	114.272345346466	97.5620321278176	219.90919194984	105.221196949115	59.727402560391	140.395571013333	-1.23624827857473	0.000232301801263621	0.0326108493318138	B430119L08Rik	12	103862156	103865043	+	1994	lncRNA	RIKEN cDNA B430119L08 gene [Source:MGI Symbol;Acc:MGI:2441857]	-	60	32	53	73	34	99	216	101	107	103	235	99	0.986629256595929	0.475460110302264	1.11749367012987	1.33391781652393	0.605492990285295	1.80140966928462	3.684247340921	1.70974699953841	2.05249817206124	1.72265529885399	3.86722483254657
ENSMUSG00000023348	755.416660730286	854.204581116633	729.648066667336	824.877153001234	720.251604480155	917.98573767158	1354.61746094475	1000.9705107194	1010.29568876408	1019.1917142673	1236.17039389676	904.477157613102	800.397300611204	1087.6204877009	-0.442442547466936	0.000232530309983939	0.0326108493318138	Trip6	5	137307916	137312666	-	2429	protein_coding	thyroid hormone receptor interactor 6 [Source:MGI Symbol;Acc:MGI:1343458]	-	816	968	611	796	723	893	1401	1047	946	1076	1321	851	11.0151530803092	11.8069331672569	10.5756739173975	11.940346229715	10.5697846530971	13.3390958424687	19.616919144658	14.5497254151867	14.8966212853074	14.7730806977356	17.8456354222739
ENSMUSG00000056174	27.7726713503782	112.952671883191	130.1663490454	47.6687801985638	79.6958898456603	22.6155500882136	220.451663879659	144.36155407701	146.311320677251	191.335247473972	276.992003477246	133.917887026147	70.1453187352346	185.561612768548	-1.40555606266764	0.000236952125715178	0.0326108493318138	Col8a2	4	126180586	126208123	+	4489	protein_coding	collagen, type VIII, alpha 2 [Source:MGI Symbol;Acc:MGI:88464]	-	30	128	109	46	80	22	228	151	137	202	296	126	0.219128841351335	0.844791677382682	1.02087189746024	0.3733701492624	0.632842646798778	0.177817919385833	1.72744975072564	1.13543681712397	1.16733395162702	1.50067994150708	2.16370883868839
ENSMUSG00000066357	1407.14868175249	1355.43206259829	1276.58556999572	1389.64857057117	1196.43454630798	1250.02313214853	1413.59794996518	1624.30649256186	1632.91977602567	1560.04530984967	1615.16283108691	1634.64849401757	1312.54542722903	1580.11347558448	-0.267222919029429	0.000238066152496606	0.0326108493318138	Wdr6	9	108449510	108455938	-	4163	protein_coding	WD repeat domain 6 [Source:MGI Symbol;Acc:MGI:1930140]	-	1520	1536	1069	1341	1201	1216	1462	1699	1529	1647	1726	1538	11.9719548451896	10.9313567324646	10.7960689739233	11.7369089110705	10.244527985879	10.5981390429714	11.9443121137473	13.7759830080607	14.0483471255066	13.1939095330379	13.604766551929
ENSMUSG00000026525	515.645931405354	265.615267475317	420.353714348449	610.367642107697	755.118556287631	651.739034360338	855.700537427625	941.696230237452	929.130284592761	732.18884305634	1019.06855333351	986.315866351303	536.473357664131	910.683385833166	-0.763616413835509	0.000244011823798554	0.0327872605703515	Opn3	1	175489987	175520342	-	1913	protein_coding	opsin 3 [Source:MGI Symbol;Acc:MGI:1338022]	-	557	301	352	589	758	634	885	985	870	773	1089	928	9.54702628395471	4.66166207270578	7.73609954867013	11.2184199120766	14.0705020010561	12.0247688504012	15.7343382510742	17.3802848893367	17.395160407289	13.4756845941777	18.6796882210865
ENSMUSG00000063382	3249.40254799424	3156.49771348574	3218.33312548031	3121.26882517552	2457.62200311555	3186.73660333919	3957.49412394494	3581.31378524822	3616.13234900125	3750.92861384619	4272.78881039562	3831.53954547031	3064.97680309843	3835.03287131776	-0.323438090777338	0.000252379132673082	0.0327872605703515	Bcl9l	9	44394122	44423193	+	7998	protein_coding	B cell CLL/lymphoma 9-like [Source:MGI Symbol;Acc:MGI:1933114]	-	3510	3577	2695	3012	2467	3100	4093	3746	3386	3960	4566	3605	14.3897619595722	13.2503333029159	14.1667987972324	13.7216056821738	10.953252676498	14.0631543362052	17.4052604508656	15.8096408346891	16.1930892399912	16.5120159615424	18.7331676958084
ENSMUSG00000016940	983.152565803387	1114.52519209742	952.960977414949	1148.19583608714	1019.11119140138	1144.14123855372	1456.14125352091	1342.27564188161	1207.86936997059	1237.99588340833	1457.95115343766	1254.1516404036	1060.34783355967	1326.06415710378	-0.322581989404279	0.000254616611115683	0.0327872605703515	Kctd2	11	115310954	115322100	+	3009	protein_coding	potassium channel tetramerisation domain containing 2 [Source:MGI Symbol;Acc:MGI:1917632]	-	1062	1263	798	1108	1023	1113	1506	1404	1131	1307	1558	1180	11.5725808097193	12.4357054036604	11.1500049401148	13.4167998095793	12.0728221428787	13.4207079436978	17.0224852170056	15.7499997235349	14.376877506443	14.4857075645256	16.9903364523175
ENSMUSG00000079017	8336.43018367184	3946.28397391899	5459.82153977587	8647.73849471771	5981.1765329168	12032.5006264791	14966.5408122511	12303.2373471328	11922.7706864294	9950.38007284198	15974.7651735137	13460.8733268742	7400.65855858005	13096.4279031739	-0.823458422903551	0.000264611292058455	0.0327872605703515	Ifi27l2a	12	103408426	103409939	-	463	protein_coding	interferon, alpha-inducible protein 27 like 2A [Source:MGI Symbol;Acc:MGI:1924183]	-	9005	4472	4572	8345	6004	11705	15479	12869	11164	10505	17071	12665	637.720854303773	286.16075059826	415.163903716881	656.714668857391	460.484534866204	917.260888733535	1137.05661939737	938.208666452053	922.280427287015	756.661051090096	1209.85879198664
ENSMUSG00000037010	469.358145821391	255.025954486267	204.205923731775	248.706679296854	384.532668505311	170.644605211066	775.448396629328	867.125361244029	522.235297891793	249.11470339433	835.654929409393	476.152487204077	288.745662842111	620.955195962159	-1.10414395140476	0.000267161016800527	0.0327872605703515	Apln	X	47114023	47123730	-	3149	protein_coding	apelin [Source:MGI Symbol;Acc:MGI:1353624]	-	507	289	171	240	386	166	802	907	489	263	893	448	5.27914015025779	2.71903278742701	2.28306252765995	2.77696207221988	4.35281290731649	1.91266044430294	8.66207399267372	9.72232773563569	5.93964315222179	2.78528346843229	9.30540997179163
ENSMUSG00000028565	1289.57770636923	1231.00763497697	1353.01351805907	1461.15174086902	1531.15728365975	1236.6593980055	1835.1634124719	1820.29403286509	1611.56045913848	1552.46767628634	2162.59635147268	1603.82612319409	1350.42788032325	1764.3180092381	-0.386040850761498	0.000268563525010988	0.0327872605703515	Nfia	4	97660971	98007111	+	10891	protein_coding	nuclear factor I/A [Source:MGI Symbol;Acc:MGI:108056]	CTF/NFI	1393	1395	1133	1410	1537	1203	1898	1904	1509	1639	2311	1509	4.193834146772	3.79485959341454	4.37377570634702	4.71718296729822	5.01142766499211	4.00774718937228	5.92718703236861	5.90112503149531	5.29963106365882	5.01877249446586	6.96287984672183
ENSMUSG00000063011	171.264806660665	513.581679968885	615.006144572304	280.831292039365	901.559753879032	179.896421156245	1664.02330498638	899.630611830906	1245.24817452317	1453.01123576769	2170.08262183693	735.485538270584	443.690016379416	1361.24691453594	-1.61747770006138	0.000269750956444356	0.0327872605703515	Msln	17	25967587	25973352	-	3064	protein_coding	mesothelin [Source:MGI Symbol;Acc:MGI:1888992]	-	185	582	515	271	905	175	1721	941	1166	1534	2319	692	1.97975231976541	5.62760343593607	7.0666376717638	3.2226407694584	10.4885432871212	2.07229575156548	19.1034713298517	10.366603616485	14.5557284474362	16.6964027526471	24.8352594397963
ENSMUSG00000013622	1478.4318715518	1517.80152843038	1516.61709438219	1579.28741353503	1640.73913219753	1841.11137309048	2093.32391359413	2029.66608811585	1955.44546102224	1683.18185525371	2039.07289046256	2095.92121599652	1595.66473553123	1982.76857074083	-0.313369255802281	0.000273239459001028	0.0327872605703515	Atraid	5	31205656	31211967	+	2082	protein_coding	all-trans retinoic acid induced differentiation factor [Source:MGI Symbol;Acc:MGI:1918918]	-	1597	1720	1270	1524	1647	1791	2165	2123	1831	1777	2179	1972	25.1508162346357	24.4758049817103	25.6458650097284	26.6707733623533	28.0910666817789	31.2116917836937	35.3669295309651	34.4195271243377	33.6381245619776	28.4638089837568	34.342603721416
ENSMUSG00000025105	27.7726713503782	62.6534351852076	78.8163214403341	34.1971684033175	144.448800345259	10.2797954946426	327.776816031599	131.93307591144	111.068447813388	270.900399888892	395.836545509712	70.1474646327435	59.6946987031899	217.943791631296	-1.86923507753572	0.000273244822893943	0.0327872605703515	Bnc1	7	81616401	81642055	-	4680	protein_coding	basonuclin 1 [Source:MGI Symbol;Acc:MGI:1097164]	zf-C2H2	30	71	66	33	145	10	339	138	104	286	423	66	0.210185762569688	0.449471084775192	0.592915001466585	0.256920911377202	1.10021485847906	0.0775276456995927	2.46362173359153	0.995334055506865	0.84998574352858	2.03801085895704	2.96586396772994
ENSMUSG00000033955	3545.64437573161	2505.25496465922	2973.52485433988	3355.46761484673	3275.50107265664	3440.64755205686	4077.38888851107	4019.17863138908	3688.7540264177	4088.13330741418	5082.24179353014	4170.58562452857	3182.67340571516	4187.71371196512	-0.396019437977161	0.000293255414774551	0.0342910535232589	Tnks1bp1	2	84878366	84903392	+	6425	protein_coding	tankyrase 1 binding protein 1 [Source:MGI Symbol;Acc:MGI:2446193]	-	3830	2839	2490	3238	3288	3347	4217	4204	3454	4316	5431	3924	19.5458038007996	13.0912622508627	16.293732095485	18.3626382910709	18.1724730528897	18.9010107569275	22.3229018930017	22.086413859541	20.56237885084	22.4024036237219	27.7372489396324
ENSMUSG00000030717	979.44954295667	485.343511998087	871.756282597635	873.582211030201	870.677596563839	819.299700923012	1715.26864790577	1674.97644200611	1313.59798856218	931.101724093638	1531.87807328463	933.173847690134	816.684807678241	1349.99945392374	-0.725454972797492	0.000294792315311291	0.0342910535232589	Nupr1	7	126222421	126230033	-	2514	protein_coding	nuclear protein transcription regulator 1 [Source:MGI Symbol;Acc:MGI:1891834]	-	1058	550	730	843	874	797	1774	1752	1230	983	1637	878	13.7990213765322	6.4816664549584	12.2082086437793	12.2178184759503	12.3452962442983	11.5025862113625	23.9998497983348	23.5236364514106	18.7138865967808	13.0399089239842	21.3668312250583
ENSMUSG00000054619	3193.85720529349	2363.18168205614	3196.83776508749	3982.41570224088	3599.26562515463	4375.08096251987	5248.2966295561	4949.40242024293	4084.96935467507	5227.61995449928	5609.08807041422	4543.64259552998	3451.77315705875	4943.83650415293	-0.518440251168042	0.000306023534379609	0.0342910535232589	Mettl7a1	15	100202021	100226543	+	2595	protein_coding	methyltransferase like 7A1 [Source:MGI Symbol;Acc:MGI:1916523]	-	3450	2678	2677	3843	3613	4256	5428	5177	3825	5519	5994	4275	43.5922841676325	30.5747189032585	43.3715921514212	53.9590617403831	49.4408531197794	59.5068150002368	71.1414411004769	67.3405149732772	56.3791121791356	70.9266332984796	75.7942203397541
ENSMUSG00000090523	894.280017482177	610.650382368502	764.279480633543	779.280928463477	803.932288818098	796.684150834798	1342.04784853056	1455.08798215371	1041.26669825051	856.272592655798	1001.28866121842	1003.32131232288	774.851208100099	1116.54751585531	-0.527256129638418	0.000308381369400904	0.0342910535232589	Gypc	18	32661375	32693087	-	2331	protein_coding	glycophorin C [Source:MGI Symbol;Acc:MGI:1098566]	-	966	692	640	752	807	775	1388	1522	975	904	1070	944	13.5882255153161	8.79534912967019	11.5433551239078	11.7545750772132	12.293813425966	12.0631819370409	20.2519746066335	22.0398182779462	15.9987664081152	12.933392885203	15.0625401539376
ENSMUSG00000022661	857.249789015006	759.783206964278	967.291217676828	964.774660105714	1136.66262892373	945.741185507115	1447.43921415724	1272.48495679802	1145.92735099774	1350.7131826628	1778.92499530488	1045.83492725181	938.583781365445	1340.22077119541	-0.514500031036777	0.000308655542933065	0.0342910535232589	Cd200	16	45202498	45229416	-	3321	protein_coding	CD200 antigen [Source:MGI Symbol;Acc:MGI:1196990]	-	926	861	810	931	1141	920	1497	1331	1073	1426	1901	984	9.14260599752089	7.68110210601736	10.2544057903312	10.2143838068433	12.2003453851564	10.0512806782345	15.3310925829755	13.5283493676095	12.3581938049616	14.3198003689221	18.7832160870566
ENSMUSG00000024845	1653.39970105918	1529.27328416852	1556.02525510235	1807.26853622381	1330.92136042253	2059.0430375769	2631.88346087909	2377.66347675182	2026.99917259432	1977.76236002799	2437.71678735887	2043.84203770857	1655.98852909222	2249.31121588678	-0.441943482532894	0.000311472969394498	0.0342910535232589	Tmem134	19	4175934	4182306	+	1848	protein_coding	transmembrane protein 134 [Source:MGI Symbol;Acc:MGI:1914240]	-	1786	1733	1303	1744	1336	2003	2722	2487	1898	2088	2605	1923	31.6889158139157	27.7834298579668	29.644000029051	34.3855425191495	25.6720085025494	39.3261499942538	50.0963789592403	45.4265179963191	39.2842436984719	37.6803424454158	46.2554035494034
ENSMUSG00000071847	4351.05184489258	1960.78778847227	3366.41227485306	4721.28179531862	4455.00024237241	4863.37124851539	6264.50144858032	7457.08689934226	5208.46942294126	6243.97005618033	6779.7535986238	6186.79381253334	3952.98419907072	6356.76253970022	-0.685409959490501	0.000312361169764165	0.0342910535232589	Apcdd1	18	63055302	63094250	+	12884	protein_coding	adenomatosis polyposis coli down-regulated 1 [Source:MGI Symbol;Acc:MGI:3513977]	-	4700	2222	2819	4556	4472	4731	6479	7800	4877	6592	7245	5821	11.9612077860987	5.10954938293793	9.19895969295783	12.8844049609514	12.3255536214465	13.3230813850228	17.1032027998132	20.4352293836095	14.4785874886293	17.0628980610487	18.4520399902663
ENSMUSG00000003070	43.5105184489258	33.5328244653224	69.2628279324149	49.7413358593709	57.7795201381037	54.4829161216055	113.12651172772	104.208009234398	58.7381214397723	100.403644714065	114.165623054811	68.0217838862968	51.3849904942905	93.1106156761771	-0.86628921606208	0.000328131201479417	0.0353679272462032	Efna2	10	80015316	80025844	+	2131	protein_coding	ephrin A2 [Source:MGI Symbol;Acc:MGI:102707]	-	47	38	58	48	58	53	117	109	55	106	122	64	0.723173163379143	0.528310703276384	1.14429737069017	0.820708922141756	0.966495642924821	0.902391236007836	1.86733653158443	1.72654808722571	0.987196018410716	1.65885615754022	1.8785947074372
ENSMUSG00000027357	665.618356697397	667.126718310098	603.064277687405	710.886591656842	756.114754910702	640.431259316231	1033.60889775156	884.334023319435	709.129320654705	843.011733919978	1025.61903990223	841.769575592923	673.873659763112	889.578765190139	-0.400737898482903	0.000330099083091748	0.0353679272462032	Crls1	2	132688586	132708705	+	2082	protein_coding	cardiolipin synthase 1 [Source:MGI Symbol;Acc:MGI:1913836]	-	719	756	505	686	759	623	1069	925	664	890	1096	792	11.3233793817803	10.7579700966122	10.1977652204038	12.0053481145501	12.9454278151003	10.8569983144842	17.4629319485458	14.9967322609573	12.1986426592863	14.2559313424556	17.2737465253199
ENSMUSG00000063727	67.5801669525869	44.1221374543715	54.9325876705359	44.5599467073531	169.353765922028	21.5875705387494	184.676613162346	211.284128814697	236.020451603449	154.39428385276	391.157626532056	55.2676994076161	67.0226958742708	205.466800562154	-1.61612101950233	0.000352766349941274	0.0368950698023039	Tnfrsf11b	15	54114015	54141880	-	2818	protein_coding	tumor necrosis factor receptor superfamily, member 11b (osteoprotegerin) [Source:MGI Symbol;Acc:MGI:109587]	-	73	50	46	43	170	21	191	221	221	163	418	52	0.84939512567197	0.525676155486335	0.686295575605557	0.555979570784655	2.14221615086742	0.270383854483888	2.30522096177209	2.64720098263143	2.99968354130296	1.92900311638814	4.86734361193075
ENSMUSG00000031489	4150.16285545818	2005.79236867573	1804.41608630826	4942.00897319458	6688.47755529704	4443.95559233398	12060.0596647851	12430.3902391344	5685.85015536995	4925.46181616167	11587.8107400633	6245.25003306062	4005.80223854463	8822.47044142916	-1.13908786621708	0.000360726098891857	0.0371186384327812	Adrb3	8	27715804	27740644	-	3376	protein_coding	adrenergic receptor, beta 3 [Source:MGI Symbol;Acc:MGI:87939]	-	4483	2273	1511	4769	6714	4323	12473	13002	5324	5200	12383	5876	43.5405784009438	19.9473983305853	18.817259867204	51.4702469064597	70.6210638584672	46.4606462630838	125.657572604161	130.000000566224	60.3197821192468	51.3673568500589	120.359437244428
ENSMUSG00000021732	1286.80043923419	520.641221961584	1362.56701156699	1315.03656678212	1047.00475284736	1142.08527945479	1752.97748514834	1763.88786272903	1331.75340791629	2324.43909555014	2150.43116213078	1863.1591742606	1112.35587864117	1864.44136462253	-0.745552930242409	0.000361196611132175	0.0371186384327812	Fgf10	13	118806327	118928651	+	4601	protein_coding	fibroblast growth factor 10 [Source:MGI Symbol;Acc:MGI:1099809]	-	1390	590	1141	1269	1051	1111	1813	1845	1247	2454	2298	1753	9.90582063803764	3.79917274346746	10.4262411927295	10.049414415814	8.11158716636378	8.7612137201069	13.4018808467614	13.5356703106123	10.3666485542504	17.7872430226335	16.3890773369276
ENSMUSG00000027070	12.0348242518305	65.3007634324699	41.7965340971469	47.6687801985638	129.505820999198	11.3077750441068	204.014478414948	140.537406949143	137.767593922375	164.813530002333	328.460112231463	70.1474646327435	51.269083003886	174.290097692168	-1.76520661205032	0.000380996488489283	0.0371186384327812	Lrp2	2	69254684	69416409	-	16701	protein_coding	low density lipoprotein receptor-related protein 2 [Source:MGI Symbol;Acc:MGI:95794]	-	13	74	35	46	130	11	211	147	129	174	351	66	0.0255228265667522	0.131273935759387	0.0881089294600637	0.100356781033406	0.276411579690111	0.0238975103324054	0.429694862121546	0.297105361575373	0.295441425135226	0.347450615926833	0.689638270341908
ENSMUSG00000074743	2027.40500857761	1353.66717710012	2159.08953278976	2055.97521552066	3731.76004202304	2654.24319671671	4831.56563336253	5370.05860430839	2618.65225036948	3807.76086557114	6223.89802407824	2913.2454630053	2330.35669545465	4294.19680678252	-0.881939865698181	0.000386327423636832	0.0371186384327812	Thbd	2	148246386	148250108	-	3723	protein_coding	thrombomodulin [Source:MGI Symbol;Acc:MGI:98736]	-	2190	1534	1808	1984	3746	2582	4997	5617	2452	4020	6651	2741	19.2876346828655	12.2073553212474	20.417367510762	19.4169046846115	35.7297595453365	25.1631873220228	45.6495493744952	50.9268738865338	25.1913582973257	36.0096856772718	58.6206493829237
ENSMUSG00000030145	73.1347012226625	54.7114504434207	66.874454555435	70.4668924674421	90.6540746994386	61.6787729678553	106.358258889309	91.7795310688278	97.1848918367141	104.192461495728	129.13816378331	107.346877695562	69.586724392709	106.000030794909	-0.608735812656606	0.00039992992359271	0.0374859576913196	Zfp248	6	118404280	118432489	-	5039	protein_coding	zinc finger protein 248 [Source:MGI Symbol;Acc:MGI:1919970]	zf-C2H2	79	62	56	68	91	60	110	96	91	110	138	101	0.514056228995602	0.364532785004765	0.467237858594967	0.491695146563957	0.641286932860325	0.432025459663537	0.742452216927974	0.643076301167019	0.69075047028171	0.728005466585169	0.898651785537914
ENSMUSG00000024925	340.678101897972	384.74503860212	390.499047136201	354.407017998018	352.654312567047	451.283022214808	482.479738052412	536.336634683463	513.691571136917	461.288443167448	462.27719499243	449.581477873493	379.044423402694	484.275843317694	-0.354080148378427	0.000407178729057973	0.0377408356113076	Rnaseh2c	19	5651901	5657047	+	1715	protein_coding	ribonuclease H2, subunit C [Source:MGI Symbol;Acc:MGI:1915459]	-	368	436	327	342	354	439	499	561	481	487	494	423	7.03576924641438	7.53202282316005	8.0163742525347	7.26596579050967	7.3298399933223	9.28758592668963	9.8959297314017	11.0416599317707	10.7276626347966	9.4700255444566	9.45190913752829
ENSMUSG00000060402	58.3226098357941	22.9435114762732	33.4372272777175	43.5236688769495	39.8479449228301	38.0352433301775	60.9142755456954	86.999347158993	75.8255749495242	53.0434349432795	68.3122170737802	89.2785913507645	39.3517009532903	72.3955735036728	-0.877501087882427	0.000410788151666506	0.0378487488074158	Chst8	7	34373893	34512136	-	6634	protein_coding	carbohydrate sulfotransferase 8 [Source:MGI Symbol;Acc:MGI:1916197]	-	63	26	28	42	40	37	63	91	71	56	73	84	0.311381621123741	0.116114683630307	0.177450374544772	0.23067747572333	0.214111444187497	0.202361880152871	0.322987164509694	0.463021924341516	0.409361539127798	0.281513271278633	0.361080559256405
ENSMUSG00000008540	9111.28771434739	8266.72367345105	8341.39401910203	10532.7278682218	8304.3117219178	10198.5851102349	11351.3269032772	12297.501126441	11664.3229520944	10192.8643468684	10927.1473804182	11765.6429315829	9125.83835121249	11366.4676067804	-0.316748300828769	0.00042314063097251	0.0381867060863741	Mgst1	6	138117314	138133753	+	2013	protein_coding	microsomal glutathione S-transferase 1 [Source:MGI Symbol;Acc:MGI:1913850]	-	9842	9368	6985	10164	8336	9921	11740	12863	10922	10761	11677	11070	160.312533995477	137.877172825748	145.887133743865	183.972219818954	147.051442047783	178.819190142717	198.355617150859	215.692043579087	207.530796367045	178.276939600894	190.346203365517
ENSMUSG00000101089	466.580878686353	172.076336072049	321.236219203786	557.517472757115	500.091708781518	733.977398317478	992.032487458467	1243.80385333901	667.478652724685	670.620570354319	945.141633486547	865.152063803837	458.58000230305	897.371543527811	-0.968791748023041	0.000429331181362605	0.0381867060863741	2610016A17Rik	19	25648496	25649617	-	1099	lncRNA	RIKEN cDNA 2610016A17 gene [Source:MGI Symbol;Acc:MGI:1919653]	-	504	195	269	538	502	714	1026	1301	625	708	1010	814	15.0369839820557	5.25685721931385	10.2907954014161	17.8367592439952	16.2203933351094	23.5723547459602	31.7519096356081	39.9590573583596	21.7523649105926	21.4843331843399	30.1564624678483
ENSMUSG00000041801	5878.54876916338	3708.02443166538	5439.52036607155	5996.9398045454	4366.33856491911	6354.96957478803	7507.92618432261	8624.40781012391	7292.07078528664	6464.66863371219	8189.04399469384	6679.95174570899	5290.72358519214	7459.67819230803	-0.495733844777812	0.000432234713411388	0.0381867060863741	Phlda3	1	135693857	135696874	+	1559	protein_coding	pleckstrin homology like domain, family A, member 3 [Source:MGI Symbol;Acc:MGI:1351485]	-	6350	4202	4555	5787	4383	6182	7765	9021	6828	6825	8751	6285	133.55357049489	79.8544633314482	122.839098997646	135.25045484041	99.8345149262796	143.874999278104	169.400827099784	195.318867766054	167.521885539828	145.99663771816	184.190947585529
ENSMUSG00000002778	1847.80840051183	1828.42137610916	1803.22189961977	1842.50198245753	1907.72036318049	1850.36318903566	2222.88761078657	2282.05979855512	2337.77723330294	2071.53557537415	2114.87137790059	1941.80936187913	1846.67286848574	2161.82349296642	-0.227256621407463	0.000434048298685991	0.0381867060863741	Kdelr1	7	45522196	45533156	+	1874	protein_coding	KDEL (Lys-Asp-Glu-Leu) endoplasmic reticulum protein retention receptor 1 [Source:MGI Symbol;Acc:MGI:1915387]	-	1996	2072	1510	1778	1915	1800	2299	2387	2189	2187	2260	1827	34.9235869828705	32.7574002301445	33.8767482646426	34.5695349504569	36.2872910781327	34.8502074372129	41.7243487038374	42.9950504520906	44.6786796511648	38.9193438797432	39.5726893761919
ENSMUSG00000001661	578.597319799545	260.320610980792	427.518834479388	430.055299617477	632.586125649929	491.374224643914	813.157233871901	1013.39898888497	618.352223884148	654.518099032252	1045.27049960839	610.070374230224	470.075402528508	792.461236585315	-0.753808632340515	0.000452253711588499	0.039340170387061	Hoxc6	15	102906689	102920313	+	2408	protein_coding	homeobox C6 [Source:MGI Symbol;Acc:MGI:96197]	Homeobox	625	295	358	415	635	478	841	1060	579	691	1117	574	8.51042850936238	3.62956681741981	6.25058838000336	6.27946987411661	9.36424136908025	7.20234404218509	11.8784478346615	14.8588436568878	9.19700105798885	9.56991054957249	15.2213581237741
ENSMUSG00000045211	1283.09741638747	859.499237611157	1117.75874042656	1449.75268473458	1203.40793666947	1357.96098484228	1549.92989999603	1840.37080528639	1619.036220049	1476.69134065308	1784.53969807807	1614.45452692632	1211.91283344525	1647.50374849815	-0.443249323222198	0.000455195628961092	0.039340170387061	Nudt18	14	70815077	70820128	+	4440	protein_coding	nudix (nucleoside diphosphate linked moiety X)-type motif 18 [Source:MGI Symbol;Acc:MGI:2385853]	-	1386	974	936	1399	1208	1321	1603	1925	1516	1559	1907	1519	10.2354785675153	6.49928002522666	8.86313235607543	11.4806403322289	9.66138348791525	10.7949912940468	12.2792186812518	14.6346855106106	13.0599160863783	11.7097994930492	14.0936809706715
ENSMUSG00000018339	4021.48281153476	3175.91145396566	6728.04780295216	5774.14007100864	4739.91304857065	5888.26685933126	8718.47654913548	6837.57506462767	7341.19721412717	8009.5586764352	9629.21525601641	6196.35937589235	5054.62700789385	7788.73035603905	-0.623943779718093	0.000459798296771341	0.039340170387061	Gpx3	11	54793279	54801203	+	1813	protein_coding	glutathione peroxidase 3 [Source:MGI Symbol;Acc:MGI:105102]	-	4344	3599	5634	5572	4758	5728	9017	7152	6874	8456	10290	5830	78.5633340353145	58.8129962136967	130.651197525194	111.981084911111	93.1927205747414	114.632471007987	169.154847185274	133.157407820053	145.022664117869	155.544079035317	186.240566576256
ENSMUSG00000026443	238.844973613252	218.845801773683	167.186136388588	225.908567027976	212.190306714071	152.14097332071	257.193607859603	336.524947252369	257.379768490638	322.04942644134	326.588544640401	250.830328080719	202.51945980638	291.761103794178	-0.525475524640765	0.000476233163799244	0.0396395436496571	Lrrn2	1	132808011	132867743	+	3595	protein_coding	leucine rich repeat protein 2, neuronal [Source:MGI Symbol;Acc:MGI:106037]	-	258	248	140	218	213	148	266	352	241	340	349	236	2.35314508258827	2.04381719459139	1.63728203717666	2.20947435936677	2.10395315241717	1.49370649561519	2.51653470176411	3.30506038918746	2.56414336260569	3.15403374808878	3.18554134207457
ENSMUSG00000054200	268.469156386989	89.1267176578305	192.264056846876	396.894409044564	224.14469019092	327.925476279097	573.36770473964	667.313673812936	347.088899416836	331.521468395497	704.64519803502	469.775444964737	249.804084401046	515.618731560778	-1.04610313080299	0.000476535481086337	0.0396395436496571	Ffar4	19	38085519	38102711	+	1401	protein_coding	free fatty acid receptor 4 [Source:MGI Symbol;Acc:MGI:2147577]	-	290	101	161	383	225	319	593	698	325	350	753	442	6.78715481702548	2.13585861559186	4.83150125781414	9.9607492135261	5.70295230489772	8.26142561155146	14.3958310013129	16.8171701325189	8.87297751542147	8.3313661744399	17.6365467706097
ENSMUSG00000040264	14.8120913868683	18.531297730836	11.9418668848991	8.29022264322848	12.9505820999198	7.19585684624979	27.0730113536424	16.2526252934383	20.2913510428304	64.409885288268	66.4406494827177	24.4453285841379	12.2869862653336	36.4854751741724	-1.56646594203344	0.000483459778042407	0.0398057122570129	Gbp2b	3	142300608	142324940	+	2823	protein_coding	guanylate binding protein 2b [Source:MGI Symbol;Acc:MGI:95666]	-	16	21	10	8	13	7	28	17	19	68	71	23	0.185839058935155	0.220392940342687	0.148930441871618	0.103254853765739	0.163526383011142	0.0899683199829493	0.337339607093684	0.20327018090562	0.257434576945425	0.803312173175994	0.825285441687879
ENSMUSG00000004263	174.967829507382	97.0687023996174	120.612855537481	168.91328635578	174.334759037382	231.295398629457	317.140990142668	283.942924244186	229.612656537292	246.273090808083	281.670922454902	211.505234271454	161.198805244517	261.690969743097	-0.699717031221261	0.000502747425247957	0.0403213854684618	Atn1	6	124719507	124733487	-	4600	protein_coding	atrophin 1 [Source:MGI Symbol;Acc:MGI:104725]	-	189	110	101	163	175	225	328	297	215	260	301	199	1.34719935295754	0.708474324685453	0.923119442994813	1.29110374199595	1.35093848439932	1.77470893307981	2.42513653067356	2.1793864584	1.78774175405196	1.88495866006303	2.14716479291901
ENSMUSG00000102923	17.5893585219062	9.70687023996174	5.97093344244956	11.3990561344392	7.96958898456603	14.3917136924996	35.7750507173131	43.97769197048	17.0874535097519	18.9440839083141	21.5230272972184	35.0737323163718	11.171253502637	28.7301732865749	-1.35437755804939	0.000528854587311595	0.0419245821600021	Gm31728	1	180083925	180103777	+	2256	lncRNA	predicted gene, 31728 [Source:MGI Symbol;Acc:MGI:5590887]	-	19	11	5	11	8	14	37	46	16	20	23	33	0.276148315716559	0.144458417267424	0.093180549069942	0.17765807701615	0.125923344037221	0.225160077404136	0.557805523374848	0.688262910722832	0.271272045806994	0.295649544336127	0.334537998472632
ENSMUSG00000031351	480.467214361542	450.928244783677	351.090886416034	623.839253902943	543.924448196631	420.44363573088	739.673345912015	993.322216463668	664.274755191606	522.856715869469	954.49947144186	611.133214603448	478.448947231951	747.626619913678	-0.643803791335867	0.000543660393904378	0.0419303587533045	Zfp185	X	72030945	72075149	+	3707	protein_coding	zinc finger protein 185 [Source:MGI Symbol;Acc:MGI:108095]	-	519	511	294	602	546	409	765	1039	622	552	1020	575	4.59063395756467	4.08401733233348	3.33441077412064	5.91705045227844	5.23028571030457	4.00316204981129	7.0187379935786	9.46081590954684	6.4178853416145	4.96595529210023	9.02888869524569
ENSMUSG00000022843	198.111722299364	199.432061293759	181.516376650467	234.198789671205	253.034450259971	199.428032596066	342.28021497105	318.360248394997	293.690607198861	219.751373336444	394.900761714181	269.96145479874	210.953572128472	306.490776735712	-0.538927923844252	0.000570415624831023	0.0432816836115657	Clcn2	16	20521714	20536496	-	6022	protein_coding	chloride channel, voltage-sensitive 2 [Source:MGI Symbol;Acc:MGI:105061]	-	214	226	152	226	254	194	354	333	275	232	422	254	1.16520117861615	1.1118775217279	1.06119988185559	1.36741095551382	1.49778101738593	1.16886250553926	1.99932175850581	1.86654778549199	1.74669106213321	1.28479414072712	2.29947352289357
ENSMUSG00000028393	913.720887427441	944.213741523551	875.338842663105	1032.13271908195	811.901877802664	870.698678396224	1435.83649500568	1217.9908602259	1103.20871722336	1037.1885939802	1202.48217725764	1021.38959866767	908.001124482489	1169.68274039341	-0.36543972870366	0.000579728815957302	0.0437737675229418	Alad	4	62427406	62438155	-	1871	protein_coding	aminolevulinate, delta-, dehydratase [Source:MGI Symbol;Acc:MGI:96853]	-	987	1070	733	996	815	847	1485	1274	1033	1095	1285	961	17.297018831844	16.9433488465177	16.4711735551482	19.3962118099918	15.4681785997192	16.4252531505803	26.9943483350352	22.9842994362067	21.117898069442	19.5176104319728	22.5364784247489
ENSMUSG00000025538	435.105184489258	287.676336202502	427.518834479388	451.817134055952	454.266572120264	435.863328972844	558.864305800189	583.182436999843	625.827984794664	487.810160639088	545.56195279471	557.991195942278	415.374565053368	559.873006161796	-0.431486549483738	0.000594752050678747	0.0445510452695002	Sumf2	5	129875827	129892891	+	2671	protein_coding	sulfatase modifying factor 2 [Source:MGI Symbol;Acc:MGI:1915152]	-	470	326	358	436	456	424	578	610	586	515	583	525	5.76968180891409	3.6160379064644	5.63512423026885	5.94763034213668	6.06242405707015	5.75962777666102	7.35993759503024	7.70888518565211	8.39166007369849	6.43012853971333	7.16228140274986
ENSMUSG00000102813	259.211599270196	175.606107068399	199.429176977815	261.142013261697	287.901402067448	269.330641959635	258.160501122233	363.293977147443	404.759055012249	321.102222245924	595.158493957866	395.3766188391	242.103490100865	389.641811387469	-0.686579166746353	0.000611183975729993	0.0452095270832194	Gm37795	4	150152996	150155454	+	2459	TEC	predicted gene, 37795 [Source:MGI Symbol;Acc:MGI:5611023]	-	280	199	167	252	289	262	267	380	379	339	636	372	3.73359662832208	2.39763908764488	2.85530363751108	3.73399196571429	4.17344477118563	3.86585189308713	3.69294563397433	5.21627763233967	5.895285423294	4.5975608197552	8.48702146182626
ENSMUSG00000021136	4136.27651978299	2467.30992644846	4195.17783666506	5482.94600066524	3728.77144615383	4621.79605439129	5350.78731539489	5110.97263639535	6041.48278154167	6805.66214406184	6339.93521472412	6701.20855317346	4105.37963068448	6058.34144088189	-0.561500217282555	0.000613347159860203	0.0452095270832194	Smoc1	12	81073582	81233188	+	3496	protein_coding	SPARC related modular calcium binding 1 [Source:MGI Symbol;Acc:MGI:1929878]	-	4468	2796	3513	5291	3743	4496	5534	5346	5657	7185	6775	6305	41.9053655598322	23.6949068399584	42.2475065560289	55.1439287931915	38.019268775238	46.6613530007416	53.8378753239228	51.6170476989474	61.8926260873435	68.5396152457129	63.5908439938202
ENSMUSG00000072849	0.925755711679272	3.52977099634972	2.38837337697982	9.32650047363204	7.96958898456603	4.11191819785702	86.0535003740776	28.6811034590087	53.3982922179748	3.78881678166282	5.61470277318741	5.31420186611694	4.70865129017732	30.4751029120047	-2.69531359865405	0.000626661381770768	0.0459719977650698	Serpina1e	12	103913190	103925234	-	1617	protein_coding	serine (or cysteine) peptidase inhibitor, clade A, member 1E [Source:MGI Symbol;Acc:MGI:891967]	-	1	4	2	9	8	4	89	30	50	4	6	5	0.0202776616950349	0.0732890738978598	0.0520013156961754	0.202798088251865	0.17568525921334	0.0897537122755953	1.87197553369261	0.626248740255993	1.18272598821231	0.0824966446533461	0.121758122861056
ENSMUSG00000030095	6221.07838248471	3400.93435498296	5255.6156160441	6526.47777588162	6247.1615652767	7259.59157831657	7925.62407377881	9273.55678507948	7725.66491809659	8158.26973511547	9175.36011518376	8247.64129621348	5818.47654549778	8417.68615391127	-0.53283584273789	0.000637365540037164	0.0464324801227676	Tmem43	6	91450685	91465445	+	3973	protein_coding	transmembrane protein 43 [Source:MGI Symbol;Acc:MGI:1921372]	-	6720	3854	4401	6298	6271	7062	8197	9700	7234	8613	9805	7760	55.4598385645748	28.7397117308962	46.5722435241165	57.7584404679689	56.0497387135644	64.4928541352844	70.1708199960122	82.4116860981728	69.6440621925142	72.2973195221255	80.9814868761367
ENSMUSG00000057346	27.7726713503782	42.3572519561967	15.5244269503688	27.9795014208961	115.559040276207	27.7554478355349	247.524675233302	105.164046016365	120.680140412623	66.3042936790994	114.165623054811	79.713027991754	42.8247232982637	122.258634397992	-1.51121066586043	0.000666064138158891	0.0475115520486704	Apol9a	15	77287989	77295335	-	5953	protein_coding	apolipoprotein L 9a [Source:MGI Symbol;Acc:MGI:3606001]	-	30	48	13	27	116	27	256	110	113	70	122	75	0.165239269078808	0.238888155537388	0.0918125027086598	0.165256765682815	0.691954381008834	0.164562293139602	1.46259560588491	0.623723967911604	0.726050311749173	0.392146615501102	0.672481995892604
ENSMUSG00000114538	29.6241827737367	15.0015267344863	26.272107146778	45.5962245377566	40.8441435459009	127.469464133568	125.696124141911	144.36155407701	97.1848918367141	132.608587358199	109.486704077154	112.661079561679	47.4679414787044	120.333156842111	-1.3437832431429	0.000706917655503941	0.0495130243870837	Gm31517	14	7404532	7454574	+	4170	lncRNA	predicted gene, 31517 [Source:MGI Symbol;Acc:MGI:5590676]	-	32	17	22	44	41	124	130	151	91	140	117	106	0.251618063968317	0.120781975562246	0.221809928606204	0.384457191125598	0.34914285461831	1.07891710677189	1.0602968688533	1.22229637219892	0.834698230155764	1.11963971322689	0.920675359950455
ENSMUSG00000019235	65.7286555292283	40.5923664580218	84.7872548827837	52.8501693505816	78.6996912225895	92.518159451783	127.629910667171	131.93307591144	99.3208235254331	107.034074081975	109.486704077154	103.095516202669	69.196049482498	113.083350744307	-0.714331528858414	0.000722060748773624	0.0497431577539628	Rps6kl1	12	85182023	85198038	-	4235	protein_coding	ribosomal protein S6 kinase-like 1 [Source:MGI Symbol;Acc:MGI:2443413]	-	71	46	71	51	79	90	132	138	93	113	117	97	0.549708974314491	0.321805660842421	0.704854197299978	0.438781318217671	0.6624132841703	0.77106598273125	1.06008502132705	1.09992051470416	0.839950492719506	0.889838808010864	0.906544569301865
ENSMUSG00000046329	1689.50417381467	1544.274810903	1604.98690933044	1983.43576739241	1749.32478211224	2039.51142613708	2874.57366979924	2615.71663546159	1737.5804287729	2095.21568025954	3188.21539137492	2451.97274102635	1768.50631161498	2493.87909111576	-0.49601933939357	0.000723057723020972	0.0497431577539628	Slc25a23	17	57350711	57366863	-	5294	protein_coding	solute carrier family 25 (mitochondrial carrier; phosphate carrier), member 23 [Source:MGI Symbol;Acc:MGI:1914222]	-	1825	1750	1344	1914	1756	1984	2973	2736	1627	2212	3407	2307	11.3033408771421	9.79362282123483	10.6735696386553	13.1731417046142	11.7786612354514	13.597534825051	19.0999026545154	17.4448719729972	11.7551390654411	13.9343751691852	21.1176170525809
ENSMUSG00000022184	748.010615036852	495.050382238049	760.696920568074	853.892932252534	745.156570056924	834.719394164975	909.84656013491	1056.42064407349	984.664508499455	1025.82214363521	1020.94012092458	968.247580006506	739.587802386234	994.323592879024	-0.42779206105355	0.00073728847892177	0.0502752791419827	Fbxo4	15	3994927	4009055	-	2047	protein_coding	F-box protein 4 [Source:MGI Symbol;Acc:MGI:2146220]	-	808	561	637	824	748	812	941	1105	922	1083	1091	911	12.9425964828452	8.11959338403552	13.083259209872	14.6669812284368	12.9759484601052	14.3926457294462	15.6347867591382	18.2213296752696	17.2280940395705	17.6439950635113	17.4889453811239
ENSMUSG00000022485	248.102530730045	82.067175665131	145.690775995769	201.037899098291	257.019244752254	296.058110245706	385.790411789404	466.545949599875	311.846026552973	314.471792878014	578.314385638303	290.155421889985	204.995956081199	391.187331391426	-0.932700845689865	0.000748245480315937	0.0505157453383235	Hoxc5	15	102875878	102925861	+	3089	protein_coding	homeobox C5 [Source:MGI Symbol;Acc:MGI:96196]	Homeobox	268	93	122	194	258	288	399	488	292	332	618	273	2.84475440644659	0.891978328086279	1.66049005384385	2.28831174016882	2.96590444116934	3.38280550274325	4.39314126878049	5.33258202159321	3.61567260277292	3.58431763534161	6.56488738123399
ENSMUSG00000032688	769.302996405475	596.531298383103	611.423584506835	873.582211030201	710.289618249447	791.544253087477	1051.0129764789	1182.61749929313	835.149290289126	872.375063977865	929.233308962516	991.63006821742	725.44566027709	977.003034536492	-0.429569809731806	0.00076543579550474	0.0510697443043874	Malt1	18	65564009	65612138	+	18040	protein_coding	MALT1 paracaspase [Source:MGI Symbol;Acc:MGI:2445027]	-	831	676	512	843	713	770	1087	1237	782	921	993	933	1.51040141443925	1.11019540417349	1.19323994651126	1.70263833971947	1.40348686763791	1.54866199580406	2.04933610957255	2.31456188372783	1.65803760059705	1.70258738257356	1.80621493416171
ENSMUSG00000038387	2201.44708237331	1983.73129994854	1766.20211227658	2260.12194811016	2449.65241413098	2949.27332741295	3445.04069475099	3499.09462199906	2823.70169248651	2674.90464785395	3307.99571720292	2769.76201262015	2268.40469737542	3086.74989781893	-0.444395933999682	0.000784794512807668	0.0515519843987722	Rras	7	44667385	44671071	+	1121	protein_coding	related RAS viral (r-ras) oncogene [Source:MGI Symbol;Acc:MGI:98179]	-	2378	2248	1479	2181	2459	2869	3563	3660	2644	2824	3535	2606	69.555925039208	59.4127913121996	55.4698405637727	70.8894195145031	77.8947652475315	92.8597231576071	108.101169226174	110.207487944033	90.2152575959237	84.0127872698922	103.476211313629
ENSMUSG00000015542	428.624894507503	409.453435576568	398.85835395563	446.635744903934	368.593490536179	448.199083566415	525.023041608136	578.402253090009	501.943946848963	473.602097707853	493.158060244961	509.100538774002	416.727500507705	513.538323045654	-0.301293202562292	0.000802741710121256	0.0520094967136768	Nat9	11	115073658	115078685	-	2066	protein_coding	N-acetyltransferase 9 (GCN5-related, putative) [Source:MGI Symbol;Acc:MGI:1913426]	-	463	464	334	431	370	436	543	605	470	500	527	479	7.34815937022432	6.65391005284093	6.79689413808302	7.60113279827403	6.3595555260618	7.65699954003412	8.93901557492446	9.88463615458751	8.7014513434799	8.07097497606853	8.37022267014803
ENSMUSG00000087658	46.2877855839636	34.4152672144098	27.466293835268	30.0520570817032	51.8023283996792	33.9233251323204	88.9541801619678	62.1423908278522	85.4372675487596	51.1490265524481	52.4038925497492	59.5190609005097	37.324509541224	66.6009697568811	-0.82945147769042	0.000828507264417266	0.0528028440204898	Hotairm1	6	52133882	52139099	+	1025	lncRNA	Hoxa transcript antisense RNA, myeloid-specific 1 [Source:MGI Symbol;Acc:MGI:3705155]	-	50	39	23	29	52	33	92	65	80	54	56	56	1.59946238833519	1.12727533346847	0.943405332710468	1.03087379429753	1.80150235801153	1.1681336196922	3.05270011832555	2.14054874291402	2.98531578214916	1.75693707752216	1.79275472216494
ENSMUSG00000078922	77.7634797810588	61.7709924361201	56.1267743590258	91.1924490755133	104.600855422429	88.406241253926	177.908360323936	118.548560963903	111.068447813388	116.506116036132	152.532758671591	102.032675829445	79.9767987213455	129.766153273066	-0.698504001091321	0.000831284525548005	0.0528028440204898	Tgtp1	11	48876154	48884999	-	3205	protein_coding	T cell specific GTPase 1 [Source:MGI Symbol;Acc:MGI:98734]	-	84	70	47	88	105	86	184	124	104	123	163	96	0.85936793532393	0.64708192468789	0.616544148454545	1.0004283850195	1.16336668235324	0.973582740754199	1.95258509908498	1.3059582154056	1.24116482986389	1.27986272634545	1.66884608427517
ENSMUSG00000033170	1626.55278542048	897.444275821917	1224.04135570216	1460.11546303862	1704.49584407406	1852.41914813459	2138.76789693775	2091.8084789437	2038.74679688228	1863.15065238269	2343.20262401021	2143.74903279157	1460.84481203197	2103.2375803247	-0.525874460845475	0.000833179555256697	0.0528028440204898	Card10	15	78659338	78687242	-	4952	protein_coding	caspase recruitment domain family, member 10 [Source:MGI Symbol;Acc:MGI:2146012]	-	1757	1017	1025	1409	1711	1802	2212	2188	1909	1967	2504	2017	11.6337310246872	6.08456562223433	8.70237082670977	10.3672059047501	12.269439689953	13.2031208832213	15.1923398940251	14.9142806814132	14.7451585819513	13.2467712718888	16.5924455844267
ENSMUSG00000047822	199.037478011043	116.482442879541	145.690775995769	175.130953338202	137.475409983764	160.364809716424	307.472057516367	217.020349506499	268.059426934233	198.912881037298	297.579246978933	164.740257849625	155.69697832079	242.297369970493	-0.638545449249954	0.000863327900672075	0.0537793707668882	Angptl8	9	21746806	21748643	+	865	protein_coding	angiopoietin-like 8 [Source:MGI Symbol;Acc:MGI:3643534]	-	215	132	122	169	138	156	318	227	251	210	318	155	8.14986182264433	4.52113095059387	5.92977315181925	7.11872086973049	5.6652402965925	6.54351255171776	12.5034883584847	8.85819793254815	11.0989467897749	8.09635422686032	12.0633443783993
ENSMUSG00000041736	4077.02815423551	2478.78168218659	3244.60523262709	4269.46466126267	3822.41411672248	5919.10624581518	7127.93713210899	6533.55536796218	5243.71229580512	5535.46131800938	6791.9187879657	5005.97815788215	3968.56668214159	6039.76050995559	-0.605930606448721	0.000865111655853425	0.0537793707668882	Tspo	15	83447793	83458404	+	1051	protein_coding	translocator protein [Source:MGI Symbol;Acc:MGI:88222]	-	4404	2809	2717	4120	3837	5758	7372	6834	4910	5844	7258	4710	137.39549319094	79.184154822166	108.687920249812	142.83211500766	129.64161716648	198.779408261754	238.562837712565	219.486538268335	178.691103741808	185.435895057009	226.605768618492
ENSMUSG00000097617	505.462618576882	232.082443009994	327.207152646236	503.63102557613	477.179140450891	509.877856534271	804.455194508231	661.577453121134	629.031882327743	592.002622134816	668.149630009302	592.002087885427	425.906706132401	657.869811664442	-0.627430635151862	0.000889344024316454	0.0544602018474842	Gm10687	9	44033483	44045836	-	4347	lncRNA	predicted gene 10687 [Source:MGI Symbol;Acc:MGI:3642689]	-	546	263	274	486	479	496	832	692	589	625	714	557	4.11842247817708	1.79248434239802	2.65005738782104	4.07359638140702	3.91292235239471	4.13994417781345	6.50959347503032	5.37343605085351	5.1826252892167	4.79486838640372	5.38970859795101
ENSMUSG00000004056	7738.39199392703	4571.93588302198	7224.82946536396	8468.46243005789	6748.24947268129	7462.10354956103	9782.05913802857	11174.1579076298	9159.94304707139	8179.10822741462	12002.3629614836	9115.98188113699	7035.66213243553	9902.26886046083	-0.49314003187983	0.00089314608998693	0.0544602018474842	Akt2	7	27290977	27340251	+	7131	protein_coding	thymoma viral proto-oncogene 2 [Source:MGI Symbol;Acc:MGI:104874]	-	8359	5181	6050	8172	6774	7259	10117	11688	8577	8635	12826	8577	38.4354333380906	21.5254588678096	35.6696866679519	41.7550769741361	33.7326229935907	36.93420955019	48.2526861811671	55.3255062939895	46.0054336700334	40.3829665363384	59.0197699885553
ENSMUSG00000022671	310.128163412556	230.317557511819	292.575738680028	324.354960916314	264.98883373682	325.869517180169	384.823518526774	395.79922773432	356.700592016072	340.993510349654	392.093410327587	391.125257346206	291.372461906285	376.922586050102	-0.372748877384938	0.000907804432932735	0.0546505020009952	Mzt2	16	15666305	15681233	-	1309	protein_coding	mitotic spindle organizing protein 2 [Source:MGI Symbol;Acc:MGI:1922845]	-	335	261	245	313	266	317	398	414	334	360	419	368	8.39137353085707	5.9073149122672	7.86902262520066	8.71236492862423	7.21601366151265	8.78662445027408	10.3410254531414	10.6756991133051	9.75957656626017	9.17168578793083	10.5034286573964
ENSMUSG00000086287	23.1438927919818	13.2366412363115	29.8546672122478	26.9432235904926	19.9239724614151	40.091202429106	42.5433035557237	50.6699494442487	44.8545654630988	47.3602097707853	43.0460545944368	55.2676994076161	25.5322666202591	47.2902970393182	-0.89810733783922	0.000932849197881674	0.0546856330593236	Gm15972	18	23883504	23885362	-	418	lncRNA	predicted gene 15972 [Source:MGI Symbol;Acc:MGI:3801965]	-	25	15	25	26	20	39	44	53	42	50	46	52	1.96106333498035	1.06317373647882	2.51453730504532	2.26635758274452	1.69906138844481	3.38525021365781	3.58011169483259	4.27991573274951	3.84323697432779	3.98914696185588	3.6110895911687
ENSMUSG00000029499	291.613049178971	157.074809337563	211.371043862714	253.888068448872	271.962224098316	324.841537630705	640.083339861116	562.14962779657	312.913992397332	249.11470339433	412.680653829275	429.387510782248	251.791788759523	434.388304676812	-0.787023872644626	0.000936216342187529	0.0546856330593236	Pxmp2	5	110422148	110434052	-	1200	protein_coding	peroxisomal membrane protein 2 [Source:MGI Symbol;Acc:MGI:107487]	-	315	178	177	245	273	316	662	588	293	263	441	404	8.60710697722873	4.39468770494279	6.20135190170278	7.43902820669444	8.07861213670794	9.55450705601781	18.7627687073352	16.539855478901	9.33921835702027	7.30904803507774	12.0590766858126
ENSMUSG00000068246	40.733251313888	32.6503817162349	40.602347408657	30.0520570817032	103.604656799358	65.7906911657123	273.630793324314	166.35040006225	112.136413657747	62.5154768974365	112.294055463748	61.6447416469564	52.2388975809256	131.428646842075	-1.33163976698561	0.000939954553930915	0.0546975809785588	Apol9b	15	77613239	77620582	+	1821	protein_coding	apolipoprotein L 9b [Source:MGI Symbol;Acc:MGI:1919148]	-	44	37	34	29	104	64	283	174	105	66	120	58	0.792265279669599	0.601978583502891	0.784988559677192	0.580255705192183	2.02805043049074	1.2751828907162	5.28562893550655	3.22533576900871	2.20548195396625	1.2087049575363	2.16236007321612
ENSMUSG00000032018	2673.58249532974	2498.19542266652	2310.75124222798	2985.51642939266	2254.39748400912	2742.64943797063	3770.88372425733	4402.54938095783	3464.4811991022	2711.84561147516	3407.18879952923	2947.25635494845	2577.51541859944	3450.70084504504	-0.420899726108366	0.000964876000496317	0.0556296891322507	Sc5d	9	42162891	42175552	-	4866	protein_coding	sterol-C5-desaturase [Source:MGI Symbol;Acc:MGI:1353611]	-	2888	2831	1935	2881	2263	2668	3900	4605	3244	2863	3641	2773	19.4604544264276	17.2368152685588	16.7187275662952	21.5726014881972	16.5145903762551	19.8937277196893	27.2591735087439	31.9442841542478	25.4995723058574	19.62165146013	24.5530409326655
ENSMUSG00000033916	1718.20260087673	1663.40458202981	1802.02771293128	1756.49092253403	1598.89879002856	1744.48129544084	2104.92663274569	2056.43511801092	2072.92170390178	1905.7748411764	1995.09105207259	1804.70295373331	1713.91765064021	1989.97538360678	-0.2158715105131	0.000974531305998478	0.0556633582492636	Chmp2a	7	12765937	12768734	-	1162	protein_coding	charged multivesicular body protein 2A [Source:MGI Symbol;Acc:MGI:1916203]	-	1856	1885	1509	1695	1605	1697	2177	2151	1941	2012	2132	1698	52.372069665557	48.0611865854135	54.5980922411359	53.1489808999842	49.0483345479232	52.9880775421977	63.719518086644	62.4841566881803	63.8915703687641	57.7441724831701	60.2057243414532
ENSMUSG00000026032	1185.89306666115	771.254962702414	1151.19596770427	1343.01606820301	1003.17201343225	1597.48021986745	1943.45545788647	2119.53354562074	1946.90173426736	1398.07339243358	1480.40996453041	1560.24966789193	1175.33538309509	1741.43729377175	-0.567425160658934	0.00101440186240614	0.0573063008327905	Ndufb3	1	58625543	58635123	+	763	protein_coding	NADH:ubiquinone oxidoreductase subunit B3 [Source:MGI Symbol;Acc:MGI:1913745]	-	1281	874	964	1296	1007	1554	2010	2217	1823	1476	1582	1468	55.0493866957749	33.93721166407	53.118628369207	61.8887670422938	46.8662591082909	73.897360344999	89.5966354034448	98.0791708260186	91.3873924906515	64.5131329688676	68.0359815513611
ENSMUSG00000018476	1476.58036012844	1549.56946739753	1398.39261222169	1398.97507104481	1167.54478623892	1309.64594601746	1960.85953661381	1725.64639145036	1577.38555211898	1599.82788605713	2062.46748535084	1603.82612319409	1383.45137384147	1755.0021624642	-0.343199698410153	0.00101956447987678	0.0573885039418641	Kdm6b	11	69289334	69304501	-	6954	protein_coding	KDM1 lysine (K)-specific demethylase 6B [Source:MGI Symbol;Acc:MGI:2448492]	-	1595	1756	1171	1350	1172	1274	2028	1805	1477	1689	2204	1509	7.52062430868419	7.48133475184879	7.07972787459865	7.07343633958726	5.98478126224875	6.64717619366689	9.91867010535587	8.76149364612244	8.12400092660729	8.09993020812244	10.4000066581485
ENSMUSG00000085419	23.1438927919818	9.70687023996174	9.55349350791929	18.6530009472641	25.9011641998396	12.3357545935711	29.0067978789025	41.1095816245791	25.6311802646279	40.7297804028753	43.0460545944368	31.8852111967016	16.5490293800896	35.2347676603539	-1.08746778611041	0.00103349806401877	0.0577527672669548	Gm11734	11	117414338	117423031	+	1816	lncRNA	predicted gene 11734 [Source:MGI Symbol;Acc:MGI:3652086]	-	25	11	8	18	26	12	30	43	24	43	46	30	0.451390128866621	0.179459355371866	0.185211734539021	0.36115033998157	0.508408567445434	0.239755098154688	0.561856736248507	0.799260300270548	0.50549812941127	0.789657791766493	0.831186921315262
ENSMUSG00000004631	1415.48048315761	1027.16335993777	1146.41922095031	1509.85679889799	1474.37396214472	1612.89991310942	1950.22371072488	2051.65493410109	1674.57044395569	1644.34648324166	1680.6676967741	1868.47337612671	1364.36562303297	1811.65610748736	-0.40912347623067	0.00106248389220228	0.0582839160377885	Sgce	6	4674350	4747207	-	10612	protein_coding	sarcoglycan, epsilon [Source:MGI Symbol;Acc:MGI:1329042]	-	1529	1164	960	1457	1480	1569	2017	2146	1568	1736	1796	1758	4.72430727772072	3.24971295282852	3.80336799762001	5.00257579658937	4.95244693435495	5.36448643196809	6.46440918210844	6.82602865022301	5.6516202472085	5.45555317485261	5.55348757476953
ENSMUSG00000042616	112.016441113192	103.245801643229	58.5151477360057	104.66406087076	103.604656799358	147.001075573389	173.073894010785	187.383209265523	102.524721058512	159.130304829838	236.753300269402	213.630915017901	104.841197289322	178.749390741994	-0.768164573613673	0.00107605147818308	0.0586485944746336	Oscp1	4	125952358	125985988	+	5254	protein_coding	organic solute carrier partner 1 [Source:MGI Symbol;Acc:MGI:1916308]	-	121	117	49	101	104	143	179	196	96	168	253	201	0.755132556959542	0.6597585935317	0.392103182961084	0.700426667069107	0.702908228763538	0.987525725313959	1.15873238238729	1.25922005929966	0.69888435706956	1.06636412732915	1.58010943473484
ENSMUSG00000028551	2187.56074669812	942.448856025376	1468.84962684259	2429.03523446594	1906.72416455742	2221.46380639226	3987.46781508647	4009.61826356942	2739.33239078211	2037.43622433918	3547.55636885891	2455.16126214602	1859.34707249695	3129.42872079702	-0.751172366004101	0.00108926468821192	0.0587807325840236	Cdkn2c	4	109518073	109524386	-	2686	protein_coding	cyclin dependent kinase inhibitor 2C [Source:MGI Symbol;Acc:MGI:105388]	-	2363	1068	1230	2344	1914	2161	4124	4194	2565	2151	3791	2310	28.8460004782349	11.7802499909114	19.2527804916754	31.7967671217198	25.3041225232324	29.1911501947102	52.2195145123423	52.7057561342341	36.526286093368	26.7067299929258	46.3131680175012
ENSMUSG00000071654	286.058514908895	331.798473656874	327.207152646236	261.142013261697	299.855785544297	357.736883213561	536.625760759697	409.183742681857	412.234815922765	363.726411039631	423.910059375649	356.051525029835	310.63313720526	416.955385801572	-0.425193607605806	0.0010929320099491	0.0587807325840236	Uqcc3	19	8857378	8858287	-	821	protein_coding	ubiquinol-cytochrome c reductase complex assembly factor 3 [Source:MGI Symbol;Acc:MGI:2147553]	-	309	376	274	252	301	348	555	428	386	384	453	335	12.3407971972098	13.5685659614213	14.0314244395348	11.1837834880529	13.0190320201796	15.3793696580006	22.9916430097501	17.5969030922211	17.9832550122916	15.5981962762828	18.1055515131642
ENSMUSG00000007338	721.163699398153	544.467176186945	631.724758211163	740.938648738546	657.491091226697	814.15980317569	1026.84064491315	990.454106117767	857.576573020675	765.34098989589	852.499037728955	878.968988655741	684.990862822866	895.28005672203	-0.386530562803481	0.00109905782351373	0.0587807325840236	Mrpl49	19	6103652	6107815	-	1876	protein_coding	mitochondrial ribosomal protein L49 [Source:MGI Symbol;Acc:MGI:108180]	-	779	617	529	715	660	792	1062	1036	803	808	911	827	13.6154662102979	9.74409686141816	11.8554268223077	13.8868765531174	12.4929918935009	15.3177436270939	19.2535964227964	18.6407143685452	16.372193412796	14.3636508687106	15.9346400080868
ENSMUSG00000026227	17.5893585219062	52.0641221961584	29.8546672122478	17.6167231168605	20.9201710844858	19.5316114398209	111.19272520246	68.8346483016209	50.1943946848963	33.1521468395497	78.6058388246237	35.0737323163718	26.2627755952466	62.8422476949204	-1.25640826825071	0.00110126057557768	0.0587807325840236	2810459M11Rik	1	85973585	85983178	+	3331	protein_coding	RIKEN cDNA 2810459M11 gene [Source:MGI Symbol;Acc:MGI:1920042]	-	19	59	25	17	21	19	115	72	47	35	84	33	0.18702809974679	0.524767150786364	0.315543858753811	0.185954056104457	0.22387212350298	0.206957618000834	1.17420355046671	0.729614563550122	0.539693739886805	0.350412609138106	0.827487356748302
ENSMUSG00000036867	576.745808376186	650.360306077436	558.879370213278	627.984365224557	556.875030296551	666.130748052838	721.302373922043	814.543338235847	772.139305471915	630.83799414686	933.912227940173	775.873472453073	606.162604706808	774.768118694985	-0.353764986655042	0.00110814957331756	0.058945179537397	Smad6	9	63860358	63929341	-	3205	protein_coding	SMAD family member 6 [Source:MGI Symbol;Acc:MGI:1336883]	MH1	623	737	468	606	559	648	746	852	723	666	998	730	6.37364552031915	6.81284826421393	6.13920556333462	6.88931365138425	6.19354262319485	7.33583274428745	7.91645915172499	8.97319677036752	8.62848242299605	6.92998842069975	10.2178428963596
ENSMUSG00000026179	893.354261770497	1028.04580268686	825.183001746529	699.487535522403	893.590164894466	922.097655869437	1309.17347760114	1101.35437282593	1134.17972670978	995.511609381906	1150.07828470789	1041.58356575892	876.959737081698	1121.98017283093	-0.354895195899517	0.00112857831669667	0.0592178432682973	Pnkd	1	74324089	74392853	+	7832	protein_coding	paroxysmal nonkinesiogenic dyskinesia [Source:MGI Symbol;Acc:MGI:1930773]	-	965	1165	691	675	897	897	1354	1152	1062	1051	1229	980	4.04001081425445	4.40699450504845	3.70936632336405	3.14023725137192	4.06700888248101	4.1554897285631	5.87984891861998	4.96495630477111	5.18651923943193	4.47524020681461	5.14915443596606
ENSMUSG00000041479	173.116318084024	150.897710093951	188.681496781406	156.477952390938	200.235923237221	196.344093947673	225.28613019281	208.416018468796	289.418743821423	269.953195693476	266.698381726402	200.87683053922	177.625582422535	243.441550073688	-0.456173634423623	0.00114611886363612	0.0597332454216281	Syt15	14	33941552	33952377	+	5164	protein_coding	synaptotagmin XV [Source:MGI Symbol;Acc:MGI:2442166]	-	187	171	158	151	201	191	233	218	271	285	285	189	1.18736232875348	0.981068065272828	1.28636794558027	1.06542303154732	1.38218183321413	1.34199093605639	1.53458118445235	1.42497055533617	2.00727655738401	1.84053864278037	1.81098702975418
ENSMUSG00000006941	530.458022792223	524.170992957934	586.345664048546	567.880251061151	512.046092258367	690.80225723998	810.256554084011	759.093204881763	652.527130903652	692.406266848881	692.480008693114	683.406359982638	568.617213393033	715.028254232343	-0.331557895812463	0.00115812403452587	0.0601563823168654	Eif1b	9	120321298	120324396	+	1125	protein_coding	eukaryotic translation initiation factor 1B [Source:MGI Symbol;Acc:MGI:1916219]	-	573	594	491	548	514	672	838	794	611	731	740	643	16.7005199507372	15.6431130890548	18.3494615969028	17.7484079772236	16.2242994413397	21.6730084106125	25.3344615133887	23.823392744213	20.7736515718385	21.6696136421468	21.5841977263826
ENSMUSG00000001761	1333.08822481815	1396.02442905632	1394.81005215622	1558.56185692695	1523.18769467518	1304.50604827014	1965.69400292696	1766.75597307494	1601.94876653924	1767.48302864571	2215.93602781796	1504.98196848432	1418.36305098383	1803.79996124819	-0.347129216564039	0.00116638731318813	0.0603829739827392	Smo	6	29735502	29761364	+	5621	protein_coding	smoothened, frizzled class receptor [Source:MGI Symbol;Acc:MGI:108075]	-	1440	1582	1168	1504	1529	1269	2033	1848	1500	1866	2368	1416	8.39995191312129	8.33838908573527	8.73622103695747	9.74912453477457	9.65938011657731	8.19125574805595	12.3011007326364	11.0974708273309	10.2070872955309	11.0709367033768	13.823716743458
ENSMUSG00000097767	29.6241827737367	27.3557252217104	47.7674675395965	35.233446233721	68.737704991882	18.5036318903566	58.0135957578051	77.4389793393235	77.9615066382432	76.7235398286721	129.13816378331	53.1420186611694	37.8703597751672	78.7363006680873	-1.06015103748608	0.00119517843076263	0.0614623486039029	Miat	5	112361094	112377261	-	10436	lncRNA	myocardial infarction associated transcript (non-protein coding) [Source:MGI Symbol;Acc:MGI:2444886]	-	32	31	40	34	69	18	60	81	73	81	138	50	0.100541139013787	0.0880069329071967	0.161146277272357	0.118706968356448	0.234785016124593	0.0625807672837648	0.195540788238269	0.261991124480993	0.267554922143674	0.258843499107927	0.433912068544035
ENSMUSG00000020444	458.24907728124	591.236641888579	533.80144975499	493.268247272095	495.110715666165	650.711054810874	739.673345912015	745.708689934226	634.37171154954	644.09885288268	744.883901242863	626.012979828575	537.062864445657	689.124913558317	-0.360075629835687	0.00119919266154084	0.0614645801589095	Guk1	11	59074701	59083069	-	2002	protein_coding	guanylate kinase 1 [Source:MGI Symbol;Acc:MGI:95871]	-	495	670	447	476	497	633	765	780	594	680	796	589	8.10716512768798	9.91516605522007	9.38723750846151	8.6631183340412	8.81551466543094	11.4720778584566	12.9962346364615	13.1512235453759	11.348710751508	11.3274239004787	13.0468511650347
ENSMUSG00000021094	1354.38060618677	976.864123239786	1326.74141091229	1469.44196351225	1300.03920310733	1582.06052662549	1933.78652526017	2028.71005133388	1672.43451226697	1544.89004272302	1938.94402434072	1545.3699026668	1334.92130559732	1777.35584309859	-0.413387788192212	0.00120400886286203	0.0615077662978265	Dhrs7	12	72697127	72711683	-	3541	protein_coding	dehydrogenase/reductase (SDR family) member 7 [Source:MGI Symbol;Acc:MGI:1913625]	-	1463	1107	1111	1418	1305	1539	2000	2122	1566	1631	2072	1454	13.547098621789	9.26213179677867	13.191144822236	14.5908862324274	13.0869951536679	15.7693990032259	19.2098622428182	20.2280995949651	16.9157004649701	15.3608181554416	19.2008536679202
ENSMUSG00000006050	1038.69790850414	930.977100287239	1128.50642062297	1093.27311107576	1066.92872530878	1241.79929575282	1168.00706125714	1361.39637752095	1334.95730544937	1317.56103582325	1311.96888133479	1394.44656966908	1083.36376025862	1314.72287184243	-0.279780606988432	0.00121879914321106	0.0618559467200757	Sra1	18	36799734	36803868	-	2279	protein_coding	steroid receptor RNA activator 1 [Source:MGI Symbol;Acc:MGI:1344414]	-	1122	1055	945	1055	1071	1208	1208	1424	1250	1391	1402	1312	16.1427092558568	13.7150500526487	17.4333897475376	16.867064340205	16.6878544154496	19.2320269110972	18.0278024615616	21.0912002238317	20.9792444376843	20.3549068118259	20.1864709888981
ENSMUSG00000084960	73.1347012226625	60.8885496870327	109.865175341072	185.493731642237	120.540033391561	125.413505034639	177.908360323936	242.833342619607	175.146398474957	142.080629312356	249.85427340684	206.191032405337	112.555949386534	199.002339423839	-0.824611752164257	0.00123565594993292	0.0623254494862628	B430010I23Rik	8	41470505	41477253	+	3270	lncRNA	RIKEN cDNA B430010I23 gene [Source:MGI Symbol;Acc:MGI:1926099]	-	79	69	92	179	121	122	184	254	164	150	267	194	0.79214964462044	0.625159162232868	1.18286295538621	1.99451196255129	1.31399276612785	1.35367536968316	1.91377224543345	2.621933028547	1.91831644869753	1.52978296335391	2.67929307879254
ENSMUSG00000085151	31.4756941970952	26.4732824726229	32.2430405892276	25.906945760089	40.8441435459009	54.4829161216055	73.4838879598865	55.4501333540835	54.4662580623343	61.5682727020208	55.2112439363429	57.3933801540629	35.2376704477569	59.5955293614551	-0.760857820730131	0.00123612074373556	0.0623254494862628	1110018N20Rik	2	167030622	167034728	+	1617	lncRNA	RIKEN cDNA 1110018N20 gene [Source:MGI Symbol;Acc:MGI:1915753]	-	34	30	27	25	41	53	76	58	51	65	59	54	0.689440497631185	0.549668054233949	0.702017761898368	0.563328022921846	0.90038695346837	1.18923668765164	1.59854090517572	1.21074756449492	1.20638050797656	1.34057047561687	1.19728820813372
ENSMUSG00000002550	1472.87733728172	1191.29771126803	1345.84839792813	1642.50036118964	1269.15704579214	1568.69679248245	1595.37388333964	1885.30453403884	1828.35752554346	1847.04818106063	1836.00780683228	1627.20861140501	1415.06294099035	1769.88342370331	-0.323036616781737	0.00126102310122747	0.0629657309158067	Uck1	2	32145014	32150171	-	2751	protein_coding	uridine-cytidine kinase 1 [Source:MGI Symbol;Acc:MGI:98904]	-	1591	1350	1127	1585	1274	1526	1650	1972	1712	1950	1962	1531	18.9630190936919	14.5389298314552	17.2237487587725	20.9927842923654	16.4450119831205	20.12641354925	20.3992187628138	24.1964665942572	23.8033084992518	23.6390671654578	23.4026547749507
ENSMUSG00000002475	128.680043923419	157.074809337563	82.3988815058039	109.845450022777	150.425992083684	136.721280078746	234.955062819111	225.624680544202	186.894022762912	152.499875461929	225.523894723028	149.860492624498	127.524409491999	195.893004822613	-0.616553880971199	0.00128586577474816	0.0639997309560345	Abhd3	18	10642092	10706771	-	2334	protein_coding	abhydrolase domain containing 3 [Source:MGI Symbol;Acc:MGI:2147183]	-	139	178	69	106	151	133	243	236	175	161	241	141	1.95272839569885	2.25947953981635	1.24291833679721	1.65476520625279	2.29737268028833	2.06753675189608	3.54099736397645	3.41308246596072	2.86788248941198	2.30044226425859	3.38823016313804
ENSMUSG00000053080	1574.71046556644	894.796947574655	1304.05186383098	1169.95767052562	1504.25992083684	1519.35377410817	2085.58876749309	1747.6352374356	1513.30760145741	1697.38991818494	2410.57905728846	1859.97065314093	1327.85510707378	1885.7452058334	-0.506236993274563	0.00131358683430298	0.0647548108540631	Zfta	19	7394990	7403269	+	7032	protein_coding	zinc finger translocation associated [Source:MGI Symbol;Acc:MGI:1919667]	zf-BED	1701	1014	1092	1129	1510	1478	2157	1828	1417	1792	2576	1750	7.93146376741215	4.27216832152087	6.52887167299072	5.84987312485758	7.62523867433584	7.62602142221147	10.4325737762603	8.77471379101689	7.7075285745307	8.49856219186552	12.0205325867572
ENSMUSG00000046178	13.8863356751891	37.0625954616721	41.7965340971469	27.9795014208961	34.8669518074764	5.13989774732128	87.9872868993377	37.2854344967113	77.9615066382432	55.8850475295266	116.972974441404	41.4507745557121	26.7886360349503	69.5905040934892	-1.38020231327251	0.00133297930249443	0.0650889167927803	Nxph1	6	8948431	9249032	+	4753	protein_coding	neurexophilin 1 [Source:MGI Symbol;Acc:MGI:107492]	-	15	42	35	27	35	5	91	39	73	59	125	39	0.103478789062291	0.261800660882561	0.30959546200558	0.206979492133347	0.261490302050784	0.038168460117199	0.651169063787666	0.276969803680228	0.587461217650197	0.413971564793981	0.862976386257487
ENSMUSG00000024292	21.2923813686233	41.4748092071092	20.3011737043285	14.5078896256498	38.8517462997594	26.7274682860706	255.259821334342	96.5597149786626	143.107423144172	32.204942644134	22.4588110927496	19.131126718021	27.1925780819235	94.7869733186803	-1.79926156275658	0.00134459779483679	0.0654497775669139	Cyp4f14	17	33124044	33136316	-	2419	protein_coding	cytochrome P450, family 4, subfamily f, polypeptide 14 [Source:MGI Symbol;Acc:MGI:1927669]	-	23	47	17	14	39	26	264	101	134	34	24	18	0.311759618065333	0.575640381062779	0.295465929551915	0.21087424196618	0.572511342588409	0.3899778391371	3.71183138926835	1.40935738614287	2.11881522673722	0.468737136187646	0.325560784896781
ENSMUSG00000058317	494.353550036731	421.807634063792	394.081607201671	458.034801038374	449.28557900491	473.898572303022	489.247990890823	579.358289871976	598.060872841318	493.493385811582	596.094277753397	602.63049161766	448.57695727475	559.814218131126	-0.318378680472238	0.0013640402819627	0.0655959002826742	Ube2e2	14	3575429	3896121	+	4628	protein_coding	ubiquitin-conjugating enzyme E2E 2 [Source:MGI Symbol;Acc:MGI:2384997]	-	534	478	330	442	451	461	506	606	560	521	637	567	3.78334372625439	3.06001678541363	2.99788483887599	3.47984809485363	3.46049756727353	3.61418204502933	3.71858187490499	4.41992504375056	4.62827155076064	3.75431481010825	4.51650812202719
ENSMUSG00000087679	1245.14143220862	1207.18168075161	1136.8657274424	1212.44506157217	1138.65502616987	1425.80763510692	1577.00291134967	1577.46069024548	1473.7928652161	1466.27209450351	1496.31828905444	1296.66525533253	1227.68276054193	1481.25201761696	-0.270921447421324	0.00136455067452814	0.0655959002826742	Tmem250-ps	2	26026826	26030533	-	2483	protein_coding	transmembrane protein 250, pseudogene [Source:MGI Symbol;Acc:MGI:1924939]	-	1345	1368	952	1170	1143	1387	1631	1650	1380	1548	1599	1220	17.761247161648	16.3229496224531	16.1196120341605	17.1688224451971	16.3465033387601	20.2675937438328	22.340733248322	22.4307014557659	21.2582016404047	20.7912476015007	21.1314090872237
ENSMUSG00000087095	29.6241827737367	19.4137404799235	47.7674675395965	29.0157792512997	36.8593490536179	25.6994887366064	54.1460227072848	31.5492138049096	71.5537115720862	113.664503449885	87.9636767799361	41.4507745557121	31.3966679724634	66.7213171449689	-1.09467184157568	0.00137602572344027	0.0657392042380613	Emx2os	19	59413536	59447067	-	5175	lncRNA	Emx2 opposite strand/antisense transcript (non-protein coding) [Source:MGI Symbol;Acc:MGI:3052329]	-	32	22	40	28	37	25	56	33	67	120	94	39	0.202753106617949	0.125950991055192	0.324970540988273	0.19714194833476	0.253890661195047	0.175279894625166	0.368042400319022	0.215248045274074	0.495209085360129	0.773316373359192	0.596038362596936
ENSMUSG00000028779	1613.59220545697	1434.85191001616	1497.51010736635	1551.30791211413	1479.35495526007	1751.67715228709	1894.14390149234	2022.97383064208	2021.65934337253	1623.50799094252	1960.46705163794	1748.37241395247	1554.71570708346	1878.52075533998	-0.27296964866282	0.00144207943633559	0.0680547182775568	Pef1	4	129996351	130021928	+	1915	protein_coding	penta-EF hand domain containing 1 [Source:MGI Symbol;Acc:MGI:1915148]	-	1743	1626	1254	1497	1485	1704	1959	2116	1893	1714	2095	1645	29.8439636181717	25.1559675239369	27.5310715041299	28.4829120701357	27.5367722101657	32.2851836403893	34.7925162906956	37.2977398554426	37.809940241505	29.8489015051234	35.8981412859841
ENSMUSG00000032492	578.597319799545	449.163359285502	681.880599127739	664.254089288682	493.118318420023	690.80225723998	635.248873547966	655.841232429332	919.518591993526	1025.82214363521	866.535794661924	982.06450485841	592.969323860245	847.505190187728	-0.515836963457655	0.00146978356540396	0.0685264452074936	Pth1r	9	110551153	110576213	-	2925	protein_coding	parathyroid hormone 1 receptor [Source:MGI Symbol;Acc:MGI:97801]	-	625	509	571	641	495	672	657	686	861	1083	926	924	7.00619208565628	5.15562325973121	8.20738098999806	7.98479050631692	6.0094494338994	8.33577246562021	7.63940757035817	7.91651202408938	11.259041925817	12.3477804769257	10.3882365356706
ENSMUSG00000034194	519.348954252072	462.400000521814	438.266514675797	463.216190190391	466.220955597113	711.361848229265	780.282862942479	873.817618717798	559.614102444376	604.31627667522	849.691686342361	670.652275503957	510.135743911075	723.062470437698	-0.50343534866038	0.00149990922703595	0.0692866098982639	R3hcc1	14	69934756	69945033	-	2766	protein_coding	R3H domain and coiled-coil containing 1 [Source:MGI Symbol;Acc:MGI:1919093]	-	561	524	367	447	468	692	807	914	524	638	908	631	6.65025929032857	5.61265533498263	5.57838192071993	5.88825642284726	6.00826437189311	9.07729328477487	9.92296685048231	11.1539745803382	7.24608236890959	7.692275259404	10.7718522099919
ENSMUSG00000102059	173.116318084024	78.5374046687813	121.807042225971	135.752395782866	112.570444406995	135.693300529282	217.550984091769	205.547908122896	146.311320677251	190.388043278557	192.771461879434	184.934224940869	126.246150949653	189.583990498463	-0.587904114582933	0.00150453129410378	0.0692866098982639	Gm20257	1	58691751	58694992	+	1073	transcribed_unprocessed_pseudogene	predicted gene, 20257 [Source:MGI Symbol;Acc:MGI:5012442]	-	187	89	102	131	113	132	225	215	137	201	206	174	5.71438869122362	2.4574208974517	3.99663793244781	4.4483908708841	3.73967686960867	4.46351150115381	7.13186276580118	6.7635447590462	4.88365527386179	6.24716028781374	6.29976300734135
ENSMUSG00000057729	32.4014499087745	22.0610687271858	62.0977078014754	53.8864471809851	68.737704991882	105.881893594818	121.828551091391	74.5708689934226	99.3208235254331	222.592985922691	123.523461010123	108.409718068785	57.5110453675202	125.041068101974	-1.12417337644431	0.00151294490248809	0.0692866098982639	Prtn3	10	79710310	79719008	+	1732	protein_coding	proteinase 3 [Source:MGI Symbol;Acc:MGI:893580]	-	35	25	52	52	69	103	126	78	93	235	132	102	0.662594840433313	0.427643015635246	1.2622628836597	1.09392317504297	1.41467461216874	2.15770359890483	2.47424578447726	1.52013565460984	2.05380504426507	4.52487189449311	2.50082186065775
ENSMUSG00000003534	1417.33199458097	1380.14045957274	1228.81810245612	1367.8867361327	1327.93276455331	1314.78584376478	1668.85777129953	1799.26122366181	1453.50151417327	1589.40863990755	2049.3665122134	1455.02847094282	1339.48265017677	1669.2373553664	-0.317546401774192	0.00152919939534234	0.069706774675207	Ddr1	17	35992459	36015513	-	4774	protein_coding	discoidin domain receptor family, member 1 [Source:MGI Symbol;Acc:MGI:99216]	-	1531	1564	1029	1320	1333	1279	1726	1882	1361	1678	2190	1369	10.515275825114	9.70607396411818	9.06206799095689	10.0744856744475	9.9152368168529	9.72054418552506	12.2964163092103	13.3067756518265	10.9043520868052	11.7218417915105	15.0528388988709
ENSMUSG00000025176	92.5755711679272	92.6564886541802	94.340748390703	110.881727853181	82.6844857148726	93.5461390012473	217.550984091769	156.790032242581	201.845544583945	100.403644714065	112.294055463748	121.163802547466	94.4475267970185	151.674677273929	-0.683069635164985	0.00153645159974095	0.069706774675207	Hoga1	19	42034049	42059392	+	2259	protein_coding	4-hydroxy-2-oxoglutarate aldolase 1 [Source:MGI Symbol;Acc:MGI:1914682]	-	100	105	79	107	83	91	225	164	189	106	120	114	1.45148202571365	1.3770900190071	1.47029749246935	1.72583357588163	1.30471969479203	1.46159689024093	3.38755588654478	2.45054819139746	3.20014552842434	1.56486165193369	1.74309769514235
ENSMUSG00000022210	964.637451569801	689.187787037283	917.135376760252	1202.08228326813	890.601569025254	1082.46246558586	1213.45104460076	1304.9902073849	1277.28714985396	1209.57975754586	1231.49147491911	1288.16253234675	957.68448887443	1254.16036110855	-0.389483708302792	0.00154463619830713	0.069706774675207	Dhrs4	14	55716215	55727797	+	1754	protein_coding	dehydrogenase/reductase (SDR family) member 4 [Source:MGI Symbol;Acc:MGI:90169]	-	1042	781	768	1160	894	1053	1255	1365	1196	1277	1316	1212	19.4789715377582	13.1920019636413	18.4088215237143	24.0968218735454	18.0993628383899	21.7821744078347	24.3351662951206	26.2687067794893	26.0810904884311	24.2799407090217	24.6197145781915
ENSMUSG00000045854	231.438927919818	210.903817031896	281.828058483619	258.033179770486	267.977429606033	263.162764662849	347.114681284201	334.612873688435	337.477206817601	298.369321555947	313.487571502964	285.904060397091	252.224029579117	319.494285874373	-0.343941446138196	0.00156107250454974	0.0701034433515239	Lyrm2	4	32800253	32801559	+	1140	protein_coding	LYR motif containing 2 [Source:MGI Symbol;Acc:MGI:1917573]	-	250	239	236	249	269	256	359	350	316	315	335	269	7.1905655615946	6.21129722933961	8.70365179186355	7.95840181940673	8.37920441401364	8.14774752278667	10.7105008203742	10.3633179692362	10.6024537482249	9.21492948188708	9.64265590105555
ENSMUSG00000035473	778.560553522268	626.534351852076	678.29803906227	949.230492649661	793.970302587391	891.258269385509	1032.64200448893	1144.37602801445	1032.72297149563	859.114205242045	1058.37147274583	1012.88687568189	786.308668176529	1023.35225961146	-0.380266936604131	0.00156248387856294	0.0701034433515239	Galm	17	80434900	80492530	+	2476	protein_coding	galactose mutarotase [Source:MGI Symbol;Acc:MGI:2442420]	-	841	710	568	916	797	867	1068	1197	967	907	1131	953	11.1371289604575	8.49565701432915	9.64477391135834	13.4795750301647	11.4304423528844	12.7048899064959	14.6703607656589	16.3184588442885	14.9382591395986	12.2163920117978	14.9888625846538
ENSMUSG00000050533	4.62877855839636	1.76488549817486	7.16512013093947	19.6892787776676	6.97339036149528	9.2518159451783	21.2716517778619	28.6811034590087	24.5632144202684	6.63042936790994	27.1377300704058	66.9589435130734	8.24554487864198	29.207178768088	-1.83109672863536	0.00157854770060654	0.0702339051325148	Gm9845	3	39412455	39413052	-	598	processed_pseudogene	predicted pseudogene 9845 [Source:MGI Symbol;Acc:MGI:3704215]	-	5	2	6	19	7	9	22	30	23	7	29	63	0.274155342482202	0.0990873181378255	0.421836759936701	1.15766734770755	0.415673379815176	0.546064287101479	1.25124305053514	1.69338497156177	1.47112917149177	0.390376053859207	1.59130536658961
ENSMUSG00000031812	4658.4027411701	4500.4580203459	4786.30024746756	4719.20923965781	4829.57092464701	5063.82726066092	5198.98507316197	5430.28892157231	5301.38245140054	5296.76586076462	5133.70990228435	5468.31372023433	4759.62807232488	5304.90765490302	-0.156581696277107	0.00157873114111263	0.0702339051325148	Map1lc3b	8	122317100	122325499	+	7517	protein_coding	microtubule-associated protein 1 light chain 3 beta [Source:MGI Symbol;Acc:MGI:1914693]	-	5032	5100	4008	4554	4848	4926	5377	5680	4964	5592	5486	5145	21.9494668260083	20.1008715482733	22.417001393023	22.0739392581951	22.9020003822896	23.7767398578128	24.3285187627499	25.5058273682124	25.2587222814173	24.8089809787729	23.9479292554538
ENSMUSG00000028125	60.1741212591527	37.0625954616721	56.1267743590258	36.2697240641246	38.8517462997594	17.4756523408923	88.9541801619678	68.8346483016209	64.0779506615697	129.766974771952	125.395028601185	40.3879341824887	40.9934356307712	86.2361194467974	-1.07549983106497	0.00157900374611507	0.0702339051325148	Abca4	3	121838092	121973772	+	12022	protein_coding	ATP-binding cassette, sub-family A (ABC1), member 4 [Source:MGI Symbol;Acc:MGI:109424]	-	65	42	47	35	39	17	92	72	60	137	134	38	0.177281952458546	0.103505119046316	0.164367326218335	0.10607735637086	0.115197549303058	0.0513067666932257	0.260274298892338	0.202158219196927	0.19089681480013	0.380040741836032	0.365750381873343
ENSMUSG00000035885	4511.20758301309	3559.7740498187	3879.91255090372	5359.62893884721	4221.88976457385	5854.34353419894	6715.07370896594	6231.44774486062	6393.9115101803	5312.86833208669	6050.77802190497	5640.49386069652	4564.45940355925	6057.42886311584	-0.408286390953622	0.00159474746586971	0.0705288457834208	Cox8a	19	7192518	7194981	-	619	protein_coding	cytochrome c oxidase subunit 8A [Source:MGI Symbol;Acc:MGI:105959]	-	4873	4034	3249	5172	4238	5695	6945	6518	5987	5609	6466	5307	258.127131625729	193.078762793261	220.6751439296	304.438262253328	243.122783897234	333.814754405972	381.594215421353	355.434301577518	369.94977236309	302.190706920282	342.769179389466
ENSMUSG00000039427	468.432390109712	448.280916536415	476.480488707475	526.429137845009	473.194345958608	520.157652028913	558.864305800189	625.24805540639	561.750034133095	544.642412364031	582.993304615959	594.127768631873	485.495821864355	577.937646825256	-0.252177420644056	0.00164635260720321	0.0719883954997134	Alg1	16	5051485	5062776	+	2682	protein_coding	asparagine-linked glycosylation 1 (beta-1,4-mannosyltransferase) [Source:MGI Symbol;Acc:MGI:2384774]	-	506	508	399	508	475	506	578	654	526	575	623	559	6.18613846167074	5.6116968406378	6.25472872199954	6.90138579920701	6.28912450924154	6.84532689143518	7.32975142294026	8.2310379728814	7.50155203181264	7.1498245509475	7.62229910185946
ENSMUSG00000028062	866.507346131798	704.18931377177	609.035211129855	814.514374697198	763.088145272197	958.076940100686	1176.70910062081	1067.89308545709	1155.53904359697	894.160760472426	1021.87590472011	903.414317239879	785.901888517251	1036.59870201788	-0.399008504358185	0.00165784327999862	0.0722866369890104	Lamtor2	3	88457126	88460381	-	1218	protein_coding	late endosomal/lysosomal adaptor, MAPK and MTOR activator 2 [Source:MGI Symbol;Acc:MGI:1932697]	-	936	798	510	786	766	932	1217	1117	1082	944	1092	850	25.1974419600785	19.4108639427926	17.6042385119725	23.5129231746731	22.3324740493992	27.7632991713182	33.9831374054245	30.955763161309	33.9784941316967	25.8470521834587	29.4192816168077
ENSMUSG00000050737	518.423198540392	1122.46717683921	428.713021167878	664.254089288682	619.635543550009	782.292437142298	1520.92310211712	1708.43772937495	830.877426911688	941.520970243211	1586.15353342544	717.417251925786	689.297577754745	1217.55500233303	-0.820506905896668	0.00171223706468559	0.0738265112096609	Ptges	2	30779483	30819875	-	3931	protein_coding	prostaglandin E synthase [Source:MGI Symbol;Acc:MGI:1927593]	-	560	1272	359	641	622	761	1573	1787	778	994	1695	675	4.67103236277995	9.58679255475017	3.83959803683247	5.94136663214882	5.61878866382722	7.02399286711232	13.6096156478583	15.3446553770896	7.57008417220442	8.43275832854451	14.1489226451889
ENSMUSG00000031072	446.214253029409	423.572519561967	452.596754937676	369.951185454071	371.582086405391	425.583533478202	489.247990890823	526.776266863793	538.254785557186	508.648652938234	466.956113970086	493.157933175652	414.916722144453	503.840290565962	-0.280167890868492	0.00177295480137576	0.0751878558095764	LTO1	7	144468837	144485438	+	7061	protein_coding	ABCE maturation factor [Source:MGI Symbol;Acc:MGI:1919534]	-	482	480	379	357	373	414	506	551	504	537	499	464	2.23825065276023	2.01402236214994	2.25666635853216	1.84218555141805	1.87584943575969	2.12733839535299	2.437274736873	2.63403182438588	2.73016239388588	2.53626359422162	2.31894820017226
ENSMUSG00000108513	23.1438927919818	21.1786259780983	22.6895470813083	31.0883349121068	20.9201710844858	21.5875705387494	35.7750507173131	50.6699494442487	33.1069411751444	28.4161258624712	58.9543791184678	45.7021360486056	23.4346903977884	42.1040970610418	-0.848092783430343	0.00181300914128622	0.0760174867127359	Gm30075	7	72852523	72888457	-	3704	lncRNA	predicted gene, 30075 [Source:MGI Symbol;Acc:MGI:5589234]	-	25	24	19	30	21	21	37	53	31	30	63	43	0.221307903353613	0.191968303174146	0.215663663894924	0.295108449157006	0.201327765493635	0.205707802898379	0.339743320932413	0.482992650186095	0.320121520578393	0.270107467071667	0.558118328562755
ENSMUSG00000038860	134.234578193494	141.190839853989	198.234990289325	205.183010419905	192.266334252655	186.06429845303	198.213118839167	270.558409296649	240.292314980887	234.906640463095	269.505733112996	238.076243602039	176.195675243733	241.925410049139	-0.460674686621561	0.00181707281372907	0.0760174867127359	Garnl3	2	32876236	33021666	-	12352	protein_coding	GTPase activating RANGAP domain-like 3 [Source:MGI Symbol;Acc:MGI:2139309]	-	145	160	166	198	193	181	205	283	225	248	288	224	0.384909484239504	0.383770830611526	0.565021743919964	0.584062434542733	0.554849734664007	0.531671940731954	0.564464663672804	0.773365480022898	0.696737828143367	0.669577284089747	0.765088930050498
ENSMUSG00000092274	22376.4413069997	19468.4519303669	22718.2075618321	19191.8654190739	20683.075812195	23986.8748071989	29740.6698652388	25281.4366623342	23764.3759686875	23714.2042364276	29831.8516177402	25270.0927137593	21404.1528062778	26267.1051773646	-0.295393543717506	0.0018828240985497	0.0769185708372762	Neat1	19	5874736	5895898	-	21163	lncRNA	nuclear paraspeckle assembly transcript 1 (non-protein coding) [Source:MGI Symbol;Acc:MGI:1914211]	-	24171	22062	19024	18520	20762	23334	30759	26444	22252	25036	31879	23776	37.449435829666	30.8856617405025	37.7936608513239	31.8856384632743	34.8375264485197	40.0050125060252	49.432794424367	42.1779577067079	40.2175837274918	39.452454221874	49.4292671193268
ENSMUSG00000035342	2468.06472733694	2105.50839932261	2166.2546529207	2492.24818212056	2478.54217420004	3100.38632118419	3248.76136243709	3044.02111378279	3065.06197331175	2823.61570653422	3482.98728696726	2931.3137493501	2468.50074284751	3099.29353206387	-0.328351124766179	0.00191143090050055	0.0776562701019633	Lzts2	19	45002853	45015550	+	3608	protein_coding	leucine zipper, putative tumor suppressor 2 [Source:MGI Symbol;Acc:MGI:2385095]	-	2666	2386	1814	2405	2488	3016	3360	3184	2870	2981	3722	2758	24.2282200414864	19.5926496624109	21.1380592087054	24.2873381199604	24.4872042544399	30.3296401256172	31.6732719786742	29.7880559328594	30.4256260467617	27.5538164356775	33.8506142243197
ENSMUSG00000070473	6.4802899817549	15.0015267344863	7.16512013093947	4.14511132161424	18.9277738383443	17.4756523408923	103.457579101419	46.8458023163809	64.0779506615697	0.947204195415705	145.046488307341	3.18852111967016	11.5325790580053	60.5939242836328	-2.39195561322132	0.00193204972992129	0.0778925229968244	Cldn3	5	135015068	135016326	+	1259	protein_coding	claudin 3 [Source:MGI Symbol;Acc:MGI:1329044]	-	7	17	6	4	19	17	107	49	60	1	155	3	0.182305681275695	0.40004832255327	0.200364084544994	0.11576189522664	0.535899346585729	0.489920531521811	2.89053497839343	1.31372958529794	1.82284472400887	0.0264886962677642	4.0398262011227
ENSMUSG00000014294	932.236001661027	930.094657538152	945.79585728401	1000.00810633944	938.41910293265	1387.77239177674	1737.50719294626	1487.59323274058	1475.92879690482	1101.59847926847	1280.15223228673	1237.14619443202	1022.38768625534	1386.65435476315	-0.43975402495406	0.00194560649070549	0.0778925229968244	Ndufa2	18	36875385	36877610	-	572	protein_coding	NADH:ubiquinone oxidoreductase subunit A2 [Source:MGI Symbol;Acc:MGI:1343103]	-	1007	1054	792	965	942	1350	1797	1556	1382	1163	1368	1164	57.7246535202753	54.5926083249356	58.2134728712647	61.4699205319835	58.4803860199714	85.6328086590956	106.849434962123	91.8225172155345	92.4136597728014	67.8062926277918	78.4777931886763
ENSMUSG00000035215	167.561783813948	210.903817031896	193.458243535366	140.933784934884	131.498218245339	212.791766739101	290.067978789026	270.558409296649	232.81655407037	273.742012475139	233.945948882809	196.625469046327	176.191269050089	249.626062093386	-0.503283500319165	0.00194848090055777	0.0778925229968244	Lsm7	10	80688655	80691043	-	1601	protein_coding	LSM7 homolog, U6 small nuclear RNA and mRNA degradation associated [Source:MGI Symbol;Acc:MGI:1913344]	-	181	239	162	136	132	207	300	283	218	289	250	185	3.70693640969252	4.42278503525743	4.2542013278813	3.09513034795226	2.92777673856435	4.6911731447806	6.37309077468638	5.96665234805924	5.20821995253927	6.0199491728434	5.12395598236332
ENSMUSG00000054312	736.9015464967	636.241222092037	706.958519586027	693.269868539982	605.688762827018	873.782617044617	1043.27783037786	988.542032553833	918.450626149166	829.750875184158	884.315686777017	776.936312826296	708.807089431064	906.878893978055	-0.355935025528317	0.00195460254228537	0.0778925229968244	Mrps21	3	95769946	95778831	-	739	protein_coding	mitochondrial ribosomal protein S21 [Source:MGI Symbol;Acc:MGI:1913542]	-	796	721	592	669	608	850	1079	1034	860	876	945	731	35.3180341716558	28.9054735545796	33.6799644577697	32.9847385840452	29.2155789922136	41.732743517318	49.6589105925325	47.2293241423426	44.5121086259216	39.5317446476006	41.9608313057465
ENSMUSG00000006800	7104.24933142673	5552.32977725811	6184.69285968925	7710.94333603289	6611.77026132059	6644.85980773695	7313.58063853396	8614.84744230424	7805.76235642355	8121.32877149426	8872.16616543164	7829.94502953669	6634.80756224409	8092.93840062072	-0.286653978600627	0.00196757090197894	0.0779625865002454	Sulf2	2	165915009	165997583	-	5871	protein_coding	sulfatase 2 [Source:MGI Symbol;Acc:MGI:1919293]	-	7674	6292	5179	7441	6637	6464	7564	9011	7309	8574	9481	7367	42.8585631997491	31.7516205605921	37.0875535873468	46.1796451344839	40.143486985822	39.9476941651191	43.8187133652326	51.8079657258184	47.6178778700848	48.7032241502233	52.9905930142922
ENSMUSG00000072625	0	0	0	0	0	0	26.1061180910123	4.78018390983478	11.7476242879545	0	0	2.12568074644677	0	7.45993450587472	-5.33307152626376	0.00197170706871495	1	Gdf2	14	33662996	33669155	+	2988	protein_coding	growth differentiation factor 2 [Source:MGI Symbol;Acc:MGI:1321394]	-	0	0	0	0	0	0	27	5	11	0	0	2	0	0	0	0	0	0	0.307328865369665	0.0564839476234906	0.140810891247205	0	0
ENSMUSG00000044122	355.49019328484	208.256488784634	297.352485433988	453.889689716759	324.760751121066	415.303737983559	535.658867497067	575.534142744108	468.837005673819	394.984149488349	597.965845344459	464.46124309862	342.508891054141	506.240208974404	-0.564387615727877	0.00197338725279432	0.0779625865002454	Proca1	11	78084218	78096589	+	2494	protein_coding	protein interacting with cyclin A1 [Source:MGI Symbol;Acc:MGI:1918274]	-	384	236	249	438	326	404	554	602	439	417	639	437	5.04850357697458	2.80352747276565	4.19756330046075	6.39895459378198	4.64169401123891	5.87742863982093	7.55498309940014	8.14771205857194	6.7327459356083	5.57604049986568	8.40738861947231
ENSMUSG00000023046	1295.1322406393	3146.79084324578	3541.95771806108	1640.42780552884	3360.17795561765	1896.62226876155	4528.92804215932	3296.41482422207	4378.65996187393	5195.41501185514	6105.98926584131	2613.52447775631	2480.18480530903	4353.15526395135	-0.8117075042032	0.00203227629440178	0.0798416364493531	Igfbp6	15	102052797	102057946	+	1112	protein_coding	insulin-like growth factor binding protein 6 [Source:MGI Symbol;Acc:MGI:96441]	-	1399	3566	2966	1583	3373	1845	4684	3448	4100	5485	6525	2459	41.2516021279308	95.0092334238905	112.140042314659	51.8689545640756	107.712699569594	60.199659132887	143.262419241601	104.664186043259	141.027310864229	164.497066795968	192.545087297331
ENSMUSG00000025608	2315.31503490986	1329.84122287476	2191.33257337899	2195.87272262514	2643.91114562978	2279.03066116225	3163.67475532564	3346.12873688435	2144.47541547387	3171.23964625178	4564.75335460136	2862.22912509058	2159.21722676346	3208.75017227126	-0.57168832425808	0.0020740153319815	0.080346437299041	Podxl	6	31496423	31540916	-	5488	protein_coding	podocalyxin-like [Source:MGI Symbol;Acc:MGI:1351317]	-	2501	1507	1835	2119	2654	2217	3272	3500	2008	3348	4878	2693	14.9426451131814	8.13557797771086	14.0577663927764	14.0685138067343	17.1728419335076	14.6573021066849	20.277731764245	21.5273004462998	13.9950276576608	20.3449984104471	29.1665060557079
ENSMUSG00000032058	4551.94083432698	2806.16794209803	3723.47409471154	4453.9221150745	3975.82870467538	4293.8705781122	4601.44503685657	5675.03433775585	5053.61437550913	4977.55804690953	5052.29671207314	5346.08707731364	3967.5340448331	5117.67259773631	-0.367293022603575	0.00209052401876893	0.080346437299041	Ppp2r1b	9	50756601	50805529	+	6449	protein_coding	protein phosphatase 2, regulatory subunit A, beta [Source:MGI Symbol;Acc:MGI:1920949]	-	4917	3180	3118	4298	3991	4177	4759	5936	4732	5255	5399	5030	24.9997533804628	14.6091182868363	20.327224801122	24.2831711791085	21.975800686435	23.5003617318668	25.0982539586337	31.0697061473718	28.0657410803188	27.1748188089409	27.4712021066187
ENSMUSG00000028331	44.4362741606051	30.8854962180601	25.0779204582881	38.3422797249317	64.752910499599	54.4829161216055	86.0535003740776	68.8346483016209	60.8740531284912	73.881927242425	71.1195684603739	70.1474646327435	42.9962995305149	71.8185270232887	-0.738106928276768	0.00218386475649233	0.0824488843066944	Trmo	4	46376505	46389437	-	2271	protein_coding	tRNA methyltransferase O [Source:MGI Symbol;Acc:MGI:1922003]	-	48	35	21	37	65	53	89	72	57	78	76	66	0.693029938406792	0.456604484505656	0.388773376727219	0.593630159108607	1.01636939506925	0.846761657390004	1.33288614618272	1.07016561478884	0.960023528027657	1.14541741562615	1.09812852155005
ENSMUSG00000023017	100.907372573041	54.7114504434207	83.5930681942938	75.6482816194599	96.6312664378631	82.2383639571404	138.265736556102	93.6916046327617	149.515218210329	116.506116036132	124.459244805654	112.661079561679	82.2883005375364	122.51649996711	-0.574776312412833	0.00221018700787103	0.0830375842107662	Asic1	15	99568249	99599011	+	5740	protein_coding	acid-sensing (proton-gated) ion channel 1 [Source:MGI Symbol;Acc:MGI:1194915]	-	109	62	70	73	97	80	143	98	140	123	133	106	0.622647858316198	0.320014059867423	0.512720289516559	0.463385387830785	0.600088354145323	0.505685549650305	0.847313891538341	0.576301584630698	0.932911181921612	0.71462718430961	0.760320083061023
ENSMUSG00000039063	306.425140565839	213.551145279158	229.283844190063	409.329743009406	315.794963513429	270.358621509099	485.380417840303	548.765112849033	404.759055012249	307.841363510104	448.240438059462	384.748215106866	290.790576344499	429.955767063003	-0.564367385636138	0.00222408291702472	0.0832437443750169	Echdc3	2	6193276	6217844	-	2685	protein_coding	enoyl Coenzyme A hydratase domain containing 3 [Source:MGI Symbol;Acc:MGI:1915106]	-	331	242	192	395	317	263	502	574	379	325	479	362	4.04214228530668	2.67030173773437	3.00643137361218	5.36023922771735	4.19247352583366	3.55397122655072	6.35886505499316	7.21611146193075	5.39907145470389	4.03668986791897	5.85393555277289
ENSMUSG00000030513	1204.40818089473	779.196947444201	969.679591053808	1659.0808064761	1726.41221378162	1329.17755745728	2592.24083711126	2621.45285615339	1240.97631114573	1461.53607352643	3446.49171894154	1799.38875186719	1277.99254951796	2193.68109145759	-0.779589642427807	0.00227009216591903	0.0837823241631915	Pcsk6	7	65511482	65700134	+	5190	protein_coding	proprotein convertase subtilisin/kexin type 6 [Source:MGI Symbol;Acc:MGI:102897]	-	1301	883	812	1601	1733	1293	2681	2742	1162	1543	3683	1693	8.21935676841882	5.04060433001817	6.57783579136234	11.2397160872175	11.8573205724575	9.03927535189217	17.5691049733215	17.8334645602401	8.5637291963602	9.91482108892498	23.2857952545307
ENSMUSG00000012187	45.3620298722843	14.1190839853989	15.5244269503688	48.7050580289673	49.8099311535377	50.3709979237485	100.556899313529	102.295935670464	49.1264288405368	51.1490265524481	160.954812831372	57.3933801540629	37.3152546523843	86.9127472270689	-1.22009491042259	0.0022723831788887	0.0837823241631915	Mogat1	1	78487628	78514810	+	1558	protein_coding	monoacylglycerol O-acyltransferase 1 [Source:MGI Symbol;Acc:MGI:1915643]	-	49	16	13	47	50	49	104	107	46	54	172	54	1.03123232932137	0.304257849789061	0.350808619142909	1.09916216724101	1.1396143459081	1.14111936532931	2.27031473330847	2.31820562238664	1.12931353601037	1.15587965626458	3.62257768106637
ENSMUSG00000020963	3044.81053571313	1319.25190988571	2948.44693388159	3385.51967192843	2833.18888401322	3342.98949485776	4117.0315122789	4882.47984550525	4224.87288028616	3725.35410056997	4254.07313448499	3902.74985047628	2812.36790504664	4184.42688726693	-0.573382823624977	0.00227331068858068	0.0837823241631915	Tshr	12	91351337	91516582	+	6012	protein_coding	thyroid stimulating hormone receptor [Source:MGI Symbol;Acc:MGI:98849]	-	3289	1495	2469	3267	2844	3252	4258	5107	3956	3933	4546	3672	17.9379494015812	7.36735306789732	17.2661883524523	19.7998331103269	16.7983249009654	19.6261002969819	24.088339681915	28.6736194043028	25.1687395314301	21.8168119441427	24.8123085410603
ENSMUSG00000024039	140.714868175249	239.141985002694	107.476801964092	205.183010419905	251.04205301383	280.638417003742	704.865188457332	521.996082953958	358.836523704791	151.552671266513	349.983139528682	309.286548608006	204.032855929919	399.420025753214	-0.968552668578407	0.00228641557387264	0.0840651464797496	Cbs	17	31827868	31856212	-	7485	protein_coding	cystathionine beta-synthase [Source:MGI Symbol;Acc:MGI:88285]	-	152	271	90	198	252	273	729	546	336	160	374	291	0.665855016974275	1.07267151655175	0.505527820525345	0.963839571338923	1.19553994932012	1.32334564130431	3.31250013928699	2.46227450587705	1.7170052694926	0.712876817124706	1.63959471977748
ENSMUSG00000018750	2673.58249532974	2573.20305633895	2352.54777632513	2821.78453218889	2724.60323409851	2798.1603336417	3375.42437984163	3374.80984034336	2524.67125606585	3442.14004614067	4064.10902399215	3296.93083773895	2657.31357132049	3346.34756402043	-0.332679295432865	0.00229946522577494	0.084344602440214	Zbtb4	11	69656738	69674849	+	8117	protein_coding	zinc finger and BTB domain containing 4 [Source:MGI Symbol;Acc:MGI:1922830]	ZBTB	2888	2916	1970	2723	2735	2722	3491	3530	2364	3634	4343	3102	11.6662031833185	10.6434208805322	10.2038728062714	12.2231590379449	11.9651222810876	12.1673226248772	14.6276474440404	14.6796192019572	11.1397663418221	14.9305460264202	17.5570278039067
ENSMUSG00000031725	742.456080766776	434.161832551016	410.80022084053	969.956049257732	482.160133566245	984.804408386757	1990.83322775534	1713.21791328479	508.35174191512	639.362831905601	2012.87094418769	1340.24171063469	670.723120894843	1367.47972828054	-1.0277839029387	0.0023126493275999	0.0845728837984612	Ces1f	8	93982864	94006375	-	3285	protein_coding	carboxylesterase 1F [Source:MGI Symbol;Acc:MGI:2142687]	-	802	492	344	936	484	958	2059	1792	476	675	2151	1261	8.00510232164957	4.43730203854467	4.40268308270414	10.381780488627	5.23197119663692	10.5811430086874	21.3177396672064	18.4135812246082	5.54237279341923	6.8525894385853	21.4863056781975
ENSMUSG00000051851	358.267460419878	183.548091810186	328.401339334726	326.427516577121	440.319791397273	397.828085642667	537.592654022327	504.787420878553	497.672083471525	546.536820754862	479.121303311992	409.193543691004	339.132047530308	495.817304355044	-0.54884135143583	0.00232775687311533	0.0847796438563582	Rtl8c	X	52609999	52610399	+	401	protein_coding	retrotransposon Gag like 8C [Source:MGI Symbol;Acc:MGI:1920115]	-	387	208	275	315	442	387	556	528	466	577	512	385	31.6442265781976	15.3676770314904	28.8325250089736	28.6218399117563	39.1411204343527	35.0162021908415	47.1574812271964	44.4452322910059	44.4493791565943	47.9863540719288	41.8969397128678
ENSMUSG00000030157	705.425852299605	397.981679838431	623.365451391734	713.995425148053	883.628178663758	880.978473890867	1457.10814678354	1074.58534293086	1111.75244397823	1033.39977719853	906.774497869767	784.37619543886	700.895843538741	1061.3327340333	-0.598887823932927	0.00234067379537163	0.0848761282114797	Clec2d	6	129157578	129163497	+	1213	protein_coding	C-type lectin domain family 2, member d [Source:MGI Symbol;Acc:MGI:2135589]	-	762	451	522	689	887	857	1507	1124	1041	1091	969	738	20.5978581765738	11.0155200029412	18.0927281718605	20.696160712334	25.9667846145147	25.6343594613436	42.254467501295	31.2781559605713	32.8257066410522	29.9950964911926	26.2131787911063
ENSMUSG00000038545	1055.36151131437	942.448856025376	1087.90407321431	969.956049257732	1114.74625921617	1014.61581532122	1164.13948820662	1154.89243261608	1119.22820488875	1329.87469036365	1513.16239737401	1296.66525533253	1030.83876072486	1262.99374479694	-0.293525068590951	0.00234137261750125	0.0848761282114797	Cul7	17	46961263	46975290	+	7410	protein_coding	cullin 7 [Source:MGI Symbol;Acc:MGI:1913765]	-	1140	1068	911	936	1119	987	1204	1208	1048	1404	1617	1220	5.04445830167252	4.27014189953955	5.16885709412496	4.60244924495811	5.36249913599157	4.8328286087683	5.52622369304929	5.50280795904939	5.40962586569606	6.31880878757971	7.16058534650141
ENSMUSG00000053522	5.55453427007563	0	8.35930681942938	14.5078896256498	32.8745545613349	2.05595909892851	58.9804890204352	17.2086620754052	39.5147362413013	34.0993510349654	107.615136486092	22.3196478376911	10.558707395903	46.6230037826484	-2.14629812920691	0.00236980674847464	0.0852528160101483	Lgals7	7	28563278	28565709	+	927	protein_coding	lectin, galactose binding, soluble 7 [Source:MGI Symbol;Acc:MGI:1316742]	-	6	0	7	14	33	2	61	18	37	36	115	21	0.212226401041239	0	0.317477288222767	0.550274855788771	1.26412366732512	0.0782803412889091	2.23805256435328	0.655433147568893	1.5266734228426	1.29511722722777	4.07075363837248
ENSMUSG00000038838	452.694543011164	503.874809728923	488.422355592374	539.900749640255	513.042290881438	460.534838159986	625.579940921665	559.28151745067	605.536633751834	565.480904663176	702.773630443957	547.362792210044	493.078264502357	601.002569906891	-0.286028536782229	0.00238480969910164	0.0852528160101483	Vars2	17	35966526	35978484	-	5460	protein_coding	valyl-tRNA synthetase 2, mitochondrial [Source:MGI Symbol;Acc:MGI:1916165]	-	489	571	409	521	515	448	647	585	567	597	751	515	2.93659536847364	3.09836606929539	3.14937968311472	3.47677389162396	3.34942257408895	2.97706159486436	4.03024844913709	3.61658647497836	3.97204876302779	3.64643101737468	4.51340190428609
ENSMUSG00000042389	201.814745146081	180.018320813836	206.594297108755	234.198789671205	175.330957660453	252.882969168207	272.663900061684	342.26116794417	263.787563556795	242.484274026421	258.276327566621	282.715539277421	208.473346594756	277.031462072185	-0.411412492225232	0.00241558107796971	0.0856641870252986	Tsen2	6	115521625	115555589	+	6715	protein_coding	tRNA splicing endonuclease subunit 2 [Source:MGI Symbol;Acc:MGI:2141599]	-	218	204	173	226	176	246	282	358	247	256	276	266	1.0644821166746	0.900064044249413	1.08316456099507	1.22629170128134	0.930726345682111	1.3292036923459	1.42831261808734	1.7995861417316	1.4069384273001	1.27139430556746	1.34871372965765
ENSMUSG00000074264	1922.79461315785	977.746565988873	1534.52989470954	2853.9091449314	1550.08505749809	2776.57276310295	3616.18080223652	3900.63007042518	2073.98966974614	2412.5290857238	4483.34016439015	3323.50184706953	1935.93967323145	3301.69527326522	-0.770273153232957	0.00243346279800431	0.0858031222102705	Amy1	3	113349359	113400348	-	3446	protein_coding	amylase 1, salivary [Source:MGI Symbol;Acc:MGI:88019]	-	2077	1108	1285	2754	1556	2701	3740	4080	1942	2547	4791	3127	19.7628291647504	9.52606958807791	15.6776949815322	29.1192396004641	16.0342878632561	28.4388322821221	36.9127592911788	39.9650647031851	21.555500327035	24.649038632339	45.6212952426184
ENSMUSG00000036904	454.546054434522	521.523664710671	489.616542280864	496.377080763305	447.293181758768	489.318265544986	606.242075669063	569.797922052306	586.313248553363	535.170370409873	617.617305050615	529.294505865247	483.11246491552	574.072571266745	-0.249098094398878	0.00244366741575138	0.0858695899833622	Fzd8	18	9212163	9218136	+	5974	protein_coding	frizzled class receptor 8 [Source:MGI Symbol;Acc:MGI:108460]	-	491	591	410	479	449	476	627	596	549	565	660	498	2.69490938563573	2.930971024576	2.88544628951234	2.92147155579482	2.66892567380397	2.89097398346282	3.56962425682463	3.36757030992294	3.51504817440133	3.15405704044695	3.6252288773512
ENSMUSG00000058756	1532.1257028292	1507.21221544133	1561.9961885448	1567.88835740059	1538.13067402124	1569.72477203192	2378.55742607001	2098.50073641747	1732.2405995511	1546.78445111385	2153.23851351737	1760.06365805793	1546.17965171151	1944.89756412129	-0.331191409244112	0.00246879315422625	0.0862203684718887	Thra	11	98631464	98659832	+	4614	protein_coding	thyroid hormone receptor alpha [Source:MGI Symbol;Acc:MGI:98742]	THR-like	1655	1708	1308	1513	1544	1527	2460	2195	1622	1633	2301	1656	11.7611097052974	10.9672953347296	11.9185798379688	11.9479309750046	11.8829716906282	12.0078124430373	18.1333355674551	16.0580410888723	13.446133381047	11.8030679726097	16.3642362959551
ENSMUSG00000020017	25.9211599270196	70.5954199269945	27.466293835268	19.6892787776676	56.783321515033	25.6994887366064	325.843029506339	158.702105806515	102.524721058512	61.5682727020208	43.981838389968	18.0682863447976	37.6924937864315	118.448042301359	-1.64990872316194	0.00247598399185538	0.0862203684718887	Hal	10	93324630	93355166	+	5549	protein_coding	histidine ammonia lyase [Source:MGI Symbol;Acc:MGI:96010]	-	28	80	23	19	57	25	337	166	96	65	47	17	0.165451686953397	0.427134375537356	0.174263915305141	0.124758528370718	0.36476695477641	0.163466111855332	2.06554831339098	1.0097851826575	0.661729755279053	0.390647406572803	0.2779328281167
ENSMUSG00000092277	0.925755711679272	0	0	0	2.98859586921226	1.02797954946426	10.6358258889309	11.4724413836035	8.54372675487596	10.4192461495728	1.87156759106247	1.06284037322339	0.823721855059298	7.3342746902115	-3.14282948828366	0.00250920582169288	1	Gm19684	17	36432570	36440584	+	1611	protein_coding	predicted gene, 19684 [Source:MGI Symbol;Acc:MGI:5011869]	-	1	0	0	0	3	1	11	12	8	11	2	1	0.020353183712521	0	0	0	0.0661273426787643	0.0225219976334012	0.23222946747983	0.251432455119538	0.189940948274543	0.227710710497993	0.0407371993929916
ENSMUSG00000067847	591.557899763055	484.461069248999	597.093344244956	596.896030312451	584.768591742532	768.928702999263	998.800740296878	849.916699168624	857.576573020675	683.881429090139	762.663793357957	667.463754384287	603.950939718543	803.383831553093	-0.412163566478579	0.00252753253516537	0.0875284005853196	Romo1	2	155985959	155987717	+	747	protein_coding	reactive oxygen species modulator 1 [Source:MGI Symbol;Acc:MGI:1914317]	-	639	549	500	576	587	748	1033	889	803	722	815	628	28.0484036894201	21.7741397050096	28.1412742572676	28.0952724993427	27.9044107521518	36.3315097244742	47.0326989521281	40.1713835498266	41.1167802441837	32.2331618875571	35.8008815267866
ENSMUSG00000022096	1414.55472744593	1980.20152895219	1699.32765772114	1696.38680837063	1389.6970791837	1315.81382331425	2104.92663274569	2710.36427687632	1797.38651605703	1797.79356289901	4136.16437624806	2016.20818800477	1582.66360416464	2427.14059213848	-0.616980316000892	0.00252763066487744	0.0875284005853196	Hr	14	70789652	70810988	+	6919	protein_coding	lysine demethylase and nuclear receptor corepressor [Source:MGI Symbol;Acc:MGI:96223]	-	1528	2244	1423	1637	1395	1280	2177	2835	1683	1898	4420	1897	7.24115621509054	9.60879182374373	8.64681018969926	8.6205845537609	7.15955836259612	6.71226490531638	10.7012689719151	13.8307382754628	9.30389800348851	9.14827457796163	20.9621416925657
ENSMUSG00000030905	18.5151142335854	27.3557252217104	25.0779204582881	14.5078896256498	70.7301022380235	16.4476727914281	83.1528205861873	65.010501173753	55.5342239066938	69.1459062653465	136.62443414756	25.5081689573613	28.7724040947809	72.496009172817	-1.33379735879788	0.0025412006608055	0.087801886224572	Crym	7	119785603	119801334	-	3391	protein_coding	crystallin, mu [Source:MGI Symbol;Acc:MGI:102675]	-	20	31	21	14	71	16	86	68	52	73	146	24	0.193388256920503	0.270846461757448	0.260366953272638	0.150429015427954	0.743508461903052	0.17119640548468	0.862563035882698	0.676887904095035	0.586542801491264	0.717928813884225	1.41280355653612
ENSMUSG00000006395	319.385720529349	300.912977438814	281.828058483619	281.867569869768	386.525065751452	393.71616744481	533.725080971807	455.073508216271	398.351259946092	383.617699143361	425.781626966712	397.502299585547	327.372593252969	432.341912471632	-0.40111116375705	0.00255822154485157	0.0881931209192818	Hyi	4	118217187	118219941	+	2209	protein_coding	hydroxypyruvate isomerase (putative) [Source:MGI Symbol;Acc:MGI:1915430]	-	345	341	236	272	388	383	552	476	373	405	455	374	5.12095868786809	4.57349201901972	4.49169897814597	4.48646780178503	6.23722435997131	6.29079462461648	8.49891612843011	7.27355734699133	6.45858338846864	6.11428419350459	6.75884355841099
ENSMUSG00000074358	235.141950766535	280.616794209803	213.759417239694	207.255566080712	280.928011705953	277.554478355349	386.757305052034	308.799880575327	328.933480062725	291.738892188037	347.175788142088	293.343943009655	249.209369726341	326.124881504978	-0.386686528032177	0.00257156962992546	0.0884294645052089	Ccdc61	7	18624808	18644340	-	2737	protein_coding	coiled-coil domain containing 61 [Source:MGI Symbol;Acc:MGI:2685005]	-	254	318	179	200	282	270	400	323	308	308	371	276	3.0428939189117	3.44224347211572	2.74961944081989	2.66248129503727	3.65872415462769	3.57924490705171	4.97056062855822	3.98348655215008	4.30427563219076	3.75285887071372	4.44790830661355
ENSMUSG00000030060	289.761537755612	275.322137715278	322.430405892276	323.318683085911	272.958422721387	363.904760510346	428.333715345128	355.645682891708	388.739567346856	366.568023625878	379.928220985681	380.496853613973	307.949324613468	383.285343968204	-0.317219706667968	0.00257761639300755	0.0884294645052089	Hmces	6	87890917	87913611	+	2445	protein_coding	5-hydroxymethylcytosine (hmC) binding, ES cell specific [Source:MGI Symbol;Acc:MGI:1914053]	-	313	312	270	312	274	354	443	372	364	387	406	358	4.19752573200521	3.78063711020101	4.64279231488614	4.64950905318876	3.97948668591739	5.25323522222615	6.16233131603394	5.13570071211651	5.69438301799515	5.27859588901086	5.44883784420785
ENSMUSG00000020163	1080.35691552971	812.729771909524	1122.53548718052	1214.51761723297	992.213828578471	1425.80763510692	1941.52167136121	1652.0315592389	1675.63840980005	1207.68534915502	1500.9972080321	1238.20903480525	1108.02687592302	1536.01387206542	-0.471514230439764	0.00259933072210976	0.0888190733941214	Uqcr11	10	80238831	80242664	-	641	protein_coding	ubiquinol-cytochrome c reductase, complex III subunit XI [Source:MGI Symbol;Acc:MGI:1913844]	-	1167	921	940	1172	996	1387	2008	1728	1569	1275	1604	1165	59.6953797930373	42.5687466169676	61.6544148454545	66.6194356387982	55.1768197916107	78.5092593852369	106.543230406594	90.9957982347129	93.6244047142518	66.3343486215629	82.1113226741525
ENSMUSG00000003380	3450.29153742865	3479.47175965174	3448.81115635886	3475.67584317354	3395.04490742513	4199.29645956148	4672.9951382912	4184.57299466937	4204.58152924333	3983.94084591846	3983.63161757647	4189.71675124659	3574.76527726657	4203.23981282424	-0.233660489816863	0.00260575096469611	0.0888423330011699	Rabac1	7	24669177	24672179	-	1523	protein_coding	Rab acceptor 1 (prenylated) [Source:MGI Symbol;Acc:MGI:1201692]	-	3727	3943	2888	3354	3408	4085	4833	4377	3937	4206	4257	3942	80.2393464131107	76.7036686341539	79.7244701786956	80.2406655132962	79.4611853755981	97.3183207456122	107.92873164852	97.0090549414418	98.8757217677222	92.0991620067566	91.719242725384
ENSMUSG00000104986	1.85151142335854	0.882442749087431	1.19418668848991	1.03627783040356	0.996198623070754	1.02797954946426	5.80135957578051	12.4284781655704	1.0679658443595	7.57763356332564	11.2294055463748	3.18852111967016	1.16476614397908	6.88222730251351	-2.56860635642022	0.00262369570219479	1	1600023N17Rik	5	45826044	45827050	-	1007	TEC	RIKEN cDNA 1600023N17 gene [Source:MGI Symbol;Acc:MGI:1917038]	-	2	1	1	1	1	1	6	13	1	8	12	3	0.0651221031993473	0.0294211600031875	0.0417508080837714	0.036182777083004	0.0352635382507413	0.0360307231255307	0.202647831782977	0.435762157196995	0.0379834741398075	0.264939571806277	0.391028569347226
ENSMUSG00000028102	360.118971843237	282.381679707978	285.410618549089	364.769796302053	260.007840621467	383.436371950167	418.664782718827	365.206050711377	473.108869051257	392.142536902102	444.497302877337	438.953074141259	322.687546495665	422.095436067026	-0.386864104934294	0.00271253149739542	0.0916214176589792	Pex11b	3	96542692	96552682	+	2812	protein_coding	peroxisomal biogenesis factor 11 beta [Source:MGI Symbol;Acc:MGI:1338882]	-	389	320	239	352	261	373	433	382	443	414	475	413	4.53588649209778	3.37150590306798	3.57336139187252	4.56098573824678	3.29594949069259	4.81277949640957	5.23712285088687	4.58546810530684	6.02577019816581	4.90988520656532	5.54287400524573
ENSMUSG00000036611	5049.07165149875	2170.80916275508	3974.25329929442	4792.78496561647	5088.58256664541	6073.30317823482	7208.18927290728	7881.56723053559	6136.53174168966	6040.32115416595	6711.44138155002	6624.68404630137	4524.80080400749	6767.12247119165	-0.580735038797174	0.00272277615628467	0.0916214176589792	Eepd1	9	25392843	25515406	+	2935	protein_coding	endonuclease/exonuclease/phosphatase family domain containing 1 [Source:MGI Symbol;Acc:MGI:1914734]	-	5454	2460	3328	4625	5108	5908	7455	8244	5746	6377	7172	6233	60.9305251286516	24.8322609823156	47.6726801117243	57.4162730551808	61.8013752839795	73.0356384365297	86.389254005888	94.8124803171158	74.8827303932487	72.4593818975507	80.1842162877289
ENSMUSG00000038600	25.9211599270196	60.0061069379453	51.3500276050662	45.5962245377566	72.722499484165	21.5875705387494	104.424472364049	46.8458023163809	81.1654041713217	125.030953794873	150.661191080529	63.7704223934032	46.1972648384504	95.3163743534261	-1.04591066274149	0.002757287648118	0.0921815453676427	Atp6v0a4	6	38025418	38101521	-	4973	protein_coding	ATPase, H+ transporting, lysosomal V0 subunit A4 [Source:MGI Symbol;Acc:MGI:2153480]	-	28	68	43	44	73	21	108	49	76	132	161	60	0.184615204284013	0.405116298487486	0.36353342868196	0.322378139351245	0.521266430796348	0.153215705195173	0.738627508324601	0.332593112384899	0.584546801300572	0.885200775255821	1.06234145825051
ENSMUSG00000035835	363.821994689954	248.848855242655	414.382780905999	390.676742062142	327.749346990278	527.353508875163	567.56634516386	444.557103614635	401.55515747917	797.545932540024	637.268764756771	592.002087885427	378.805538127699	573.415898573314	-0.599196258392211	0.00277162765772815	0.0922624183096216	Plppr3	10	79696309	79710468	-	4357	protein_coding	phospholipid phosphatase related 3 [Source:MGI Symbol;Acc:MGI:2388640]	-	393	282	347	377	329	513	587	465	376	842	681	557	2.95755536644995	1.91756816404525	3.34839181039802	3.1527182256173	2.68141290178686	4.27200993576796	4.58216499110258	3.60247539623734	3.30083974764828	6.44482078543469	5.12880592371546
ENSMUSG00000024168	663.766845274038	495.932824987136	475.286302018985	780.317206293881	666.456878834334	606.507934183911	971.727728943235	887.202133665336	844.760982888361	598.633051502726	871.21471363958	880.031829028964	614.711331932047	842.2617399447	-0.454078285798404	0.00279333481493452	0.0925867871528296	Tmem204	17	25276676	25302565	-	2378	protein_coding	transmembrane protein 204 [Source:MGI Symbol;Acc:MGI:3039635]	-	717	562	398	753	669	590	1005	928	791	632	931	828	9.88633217617526	7.00186491389568	7.03664397336519	11.5375738273787	9.99009513850888	9.00207465541276	14.3738925174156	13.1726076487017	12.7229783603447	8.86322025059074	12.8467876103414
ENSMUSG00000029726	710.980386569681	909.798474309141	729.648066667336	733.684703925721	674.4264678189	791.544253087477	1033.60889775156	940.740193455485	963.305191612265	854.378184264966	1072.4082296788	810.947204769444	758.347058729709	945.897983588753	-0.318549759291789	0.00280467994739255	0.0926896830513319	Mepce	5	137780168	137785917	-	3553	protein_coding	methylphosphate capping enzyme [Source:MGI Symbol;Acc:MGI:106477]	-	768	1031	611	708	677	770	1069	984	902	902	1146	763	7.08751360595249	8.59711468478169	7.23003432180091	7.26054827413178	6.76626211751255	7.86317545857169	10.2329930528771	9.34836200005664	9.71036344774136	8.46637778728001	10.5839096457272
ENSMUSG00000037579	24.9954042153403	6.17709924361201	15.5244269503688	17.6167231168605	42.8365407920424	10.2797954946426	66.7156351214759	34.4173241508104	29.9030436420659	42.6241887937067	64.5690818916552	41.4507745557121	19.5716649688111	46.6133413592377	-1.25320957181767	0.00280869932047011	0.0926896830513319	Kcnh3	15	99122742	99140698	+	5756	protein_coding	potassium voltage-gated channel, subfamily H (eag-related), member 3 [Source:MGI Symbol;Acc:MGI:1341723]	-	27	7	13	17	43	10	69	36	28	45	69	39	0.153805148009647	0.03603018708521	0.0949547999695364	0.107611702724799	0.265279094821985	0.063034986427049	0.407707299507082	0.211114151423337	0.186063592224811	0.260722218042075	0.393355311616187
ENSMUSG00000035637	721.163699398153	788.021374935076	832.348121877468	869.437099708587	645.536707749848	949.853103704972	1147.70230274191	961.773002658758	981.460610966376	886.5831269091	1049.94941858605	1017.13823717478	801.060017895684	1007.4344498395	-0.331141357280971	0.00281440345203992	0.0926896830513319	Grhpr	4	44981395	44990734	+	1603	protein_coding	glyoxylate reductase/hydroxypyruvate reductase [Source:MGI Symbol;Acc:MGI:1923488]	-	779	893	697	839	648	924	1187	1006	919	936	1122	957	15.9342573989512	16.5046834398168	18.2807332670177	19.0704001387703	14.3547898914446	20.9141827106465	25.1847345769056	21.1836156845894	21.928359590533	19.4728106117553	22.9676228525286
ENSMUSG00000029061	404.555246003842	513.581679968885	502.752595854253	456.99852320797	666.456878834334	436.891308522309	705.832081719962	573.622069180174	652.527130903652	836.381304552068	817.875037294299	531.420186611694	496.872705398599	686.276301710308	-0.466325875516927	0.00290697080534371	0.0948587519390313	Mmp23	4	155735112	155737841	-	2340	protein_coding	matrix metallopeptidase 23 [Source:MGI Symbol;Acc:MGI:1347361]	-	437	582	421	441	669	425	730	600	611	883	874	500	6.12341188286358	7.36879355884962	7.5641580490131	6.86679526771795	10.152327452724	6.58984988446538	10.6102882921641	8.65507874353795	9.98733248646082	12.584360758455	12.2560998004538
ENSMUSG00000022347	3.70302284671709	5.29465649452458	0	0	4.98099311535377	4.11191819785702	175.974573798675	73.6148322114556	39.5147362413013	2.84161258624712	2.80735138659371	0	3.01509844240874	49.1255177040455	-4.01707257518686	0.00291703378273654	0.0948587519390313	A1bg	15	60768708	60794861	-	2400	protein_coding	alpha-1-B glycoprotein [Source:MGI Symbol;Acc:MGI:2152878]	-	4	6	0	0	5	4	182	77	37	3	3	0	0.054648298268119	0.0740677703080246	0	0	0.0739799646218676	0.0604715636456823	2.57917213348565	1.08296672778519	0.589677609572952	0.0416865857513939	0.0410172676388184
ENSMUSG00000043501	20.366625656944	22.0610687271858	16.7186136388588	16.580445286457	30.8821573151934	27.7554478355349	65.7487418588458	34.4173241508104	26.6991461089874	45.4658013799539	35.5597842301869	41.4507745557121	22.3940597433623	41.5569287140827	-0.890290223630734	0.00294703581246764	0.0952533817035304	Lgals2	15	78735060	78739729	-	592	protein_coding	lectin, galactose-binding, soluble 2 [Source:MGI Symbol;Acc:MGI:895068]	-	22	25	14	16	31	27	68	36	25	48	38	39	1.21850935327563	1.25114476871663	0.994261642508462	0.98475828439419	1.85949640806316	1.65479616733117	3.90667593726665	2.05265718850123	1.61526007005009	2.70399475144177	2.10629212199338
ENSMUSG00000025410	3385.4886376111	3212.09160667825	3053.5353624687	3286.03700020969	2955.72131465093	3489.99057043115	3587.17400435762	3600.43452088756	3905.55109282268	3641.05292717797	3690.73128957519	3610.46874783985	3230.47741534164	3672.56876377681	-0.184846840698357	0.00295565582236634	0.0952533817035304	Dctn2	10	127102237	127117819	+	4795	protein_coding	dynactin 2 [Source:MGI Symbol;Acc:MGI:107733]	-	3657	3640	2557	3171	2967	3395	3710	3766	3657	3844	3944	3397	25.0071524629628	22.4906514219987	22.4200446265057	24.0956694959577	21.9727437780769	25.6893795925453	26.3151275671272	26.511074773272	29.1716170769094	26.7350549536364	26.9901319820646
ENSMUSG00000026436	1004.44494717201	953.038169014425	979.233084561727	879.799878012623	992.213828578471	1000.22410162872	1146.73540947928	1048.77234981775	1091.4610929354	1115.8065421997	1077.08714865645	1184.00417577085	968.159001494663	1110.64445314324	-0.19782601034299	0.0029591108761793	0.0952533817035304	Elk4	1	131935345	131960350	+	6407	protein_coding	ELK4, member of ETS oncogene family [Source:MGI Symbol;Acc:MGI:102853]	ETS	1085	1080	820	849	996	973	1186	1097	1022	1178	1151	1114	5.55268334205485	4.99411218558867	5.3808822018251	4.82818979049082	5.52026556678983	5.51011375938026	6.29578874132649	5.77946361611962	6.10127116355227	6.1316432670694	5.89491182172998
ENSMUSG00000038213	429.550650219182	339.740458398661	389.304860447711	395.85813121416	489.13352392774	469.786654105165	543.394013598108	583.182436999843	528.64309295795	439.502746672887	597.965845344459	521.854623252683	418.895713052103	535.757126470989	-0.355314267115118	0.00297199103006074	0.0952533817035304	Tapbpl	6	125200896	125208823	-	2352	protein_coding	TAP binding protein-like [Source:MGI Symbol;Acc:MGI:2384853]	-	464	385	326	382	491	457	562	610	495	464	639	491	6.46857408071612	4.84967543683494	5.82739744020266	5.917760880794	7.41309441415041	7.04987361889715	8.12679266101667	8.75443551482857	8.04992875727003	6.57910741110435	8.91497755823297
ENSMUSG00000019817	2110.72302262874	1423.38015427803	1466.46125346561	1957.52882163233	2503.4471397768	1610.84395401049	2503.28665694929	2879.58278728447	2509.71973424481	1976.81515583258	2553.75397800474	2750.63088590213	1845.39739096533	2528.96486636967	-0.454486321439541	0.00301170468587138	0.0957062528059061	Plagl1	10	12936248	13007438	+	7819	protein_coding	pleiomorphic adenoma gene-like 1 [Source:MGI Symbol;Acc:MGI:1100874]	zf-C2H2	2280	1613	1228	1889	2513	1567	2589	3012	2350	2087	2729	2588	9.56118071758367	6.11184619551573	6.60300323227515	8.80262319620963	11.4129162969026	7.27143677448146	11.2616238892768	13.0028749180959	11.4958424834566	8.90138426531875	11.4527303630986
ENSMUSG00000019831	124.977021076702	50.2992366979835	132.55472242238	95.3375603971275	100.616060930146	114.105729990532	182.742826637086	175.91076788192	113.204379502107	195.124064255635	137.560217943092	181.745703821199	102.981721919145	164.381326673506	-0.678094259287284	0.00306028037337237	0.0957062528059061	Wasf1	10	40759471	40814566	+	2854	protein_coding	WASP family, member 1 [Source:MGI Symbol;Acc:MGI:1890563]	-	135	57	111	92	101	111	189	184	106	206	147	171	1.55098533977492	0.591711689916945	1.63517171519962	1.17453300633421	1.25667438152353	1.41114440742903	2.25230923198035	2.17620340096806	1.42061387408246	2.40713010926059	1.69012987888053
ENSMUSG00000022217	805.407469160967	430.632061554666	560.073556901768	907.779379433519	816.882870918018	1014.61581532122	1321.74309001533	1304.03417060293	1145.92735099774	846.800550701641	1072.4082296788	1090.4742229272	755.89852554836	1130.23126915394	-0.580413072945201	0.00306596214445182	0.0957062528059061	Emc9	14	55818973	55822759	-	2465	protein_coding	ER membrane protein complex subunit 9 [Source:MGI Symbol;Acc:MGI:1934682]	-	870	488	469	876	820	987	1367	1364	1073	894	1146	1026	11.5725808097193	5.86532607063951	7.99926851692812	12.9484728250647	11.8127846146722	14.5278945196645	18.8613065009913	18.678116383012	16.6497207408834	12.0950288557391	15.2554283859102
ENSMUSG00000031516	876.690658960271	894.796947574655	850.260922204817	808.296707714777	857.727014463919	1040.31530405783	1059.71501584257	1029.65161417841	963.305191612265	1112.01772541804	1080.83028383858	1053.27480986438	888.014592496044	1049.79910679237	-0.241517532484321	0.00309880540495533	0.0957111182976118	Dctn6	8	34557574	34575950	-	2853	protein_coding	dynactin 6 [Source:MGI Symbol;Acc:MGI:1343154]	-	947	1014	712	780	861	1012	1096	1077	902	1174	1155	991	10.8836884247968	10.5299290700788	10.4923453849053	9.96148758766783	10.7165929824485	12.8700783195437	13.0655881411136	12.7423509451393	12.0928571082457	13.7231129820221	13.284246511836
ENSMUSG00000038803	665.618356697397	666.24427556101	657.996865357941	585.496974178011	735.194583826216	817.243741824083	813.157233871901	848.960662386657	1002.81992785357	866.69183880537	823.489740067487	762.056547601169	687.96579957411	852.862658431025	-0.30977112185027	0.00310119534782226	0.0957111182976118	Ost4	5	31063229	31065132	-	1272	protein_coding	oligosaccharyltransferase complex subunit 4 (non-catalytic) [Source:MGI Symbol;Acc:MGI:1914945]	-	719	755	551	565	738	795	841	888	939	915	880	717	18.5340219126309	17.5852725102385	18.2120504095418	16.1842546660853	20.6027222229956	22.6768363671309	22.4868729448624	23.564676654576	28.2359650886794	23.9894502908965	22.7013808315473
ENSMUSG00000031434	756.342416441965	444.751145540065	610.229397818345	1045.60433087719	743.164172810782	847.055148758547	1349.7829946316	1556.42788104221	1083.98533202489	729.347230470093	1225.87677214592	943.802251422368	741.191102041149	1148.20374362285	-0.631679061967061	0.00310814604437085	0.0957111182976118	Morc4	X	138722381	138772426	-	6051	protein_coding	microrchidia 4 [Source:MGI Symbol;Acc:MGI:1922996]	-	817	504	511	1009	746	824	1396	1628	1015	770	1310	888	4.42713531829977	2.4677016185916	3.55048844345114	6.07568683379413	4.3779120363243	4.94085953832843	7.84654458715417	9.08161063600581	6.41598063719516	4.24375092098144	7.10396570574808
ENSMUSG00000121096	212.923813686233	220.610687271858	223.312910747613	211.400677402326	233.110477798556	210.735807640172	395.459344415705	310.711954139261	296.89450473194	199.860085232714	309.744436320839	274.212816291634	218.682395757793	297.813856855349	-0.445732523303252	0.00311686870987513	0.0957262118257086	ENSMUSG00000121096	11	98657199	98658572	+	1374	lncRNA	novel transcript, sense intronic to Thraand KO:Thra	-	230	250	187	204	234	205	409	325	278	211	331	258	5.4886937125185	5.3906674168868	5.72201813642424	5.40972018239254	6.04761981537713	5.4133932521244	10.1241077076216	7.98421565315455	7.73895316706153	5.12132145184519	7.90492901801973
ENSMUSG00000076522	6.4802899817549	2.64732824726229	2.38837337697982	1.03627783040356	6.97339036149528	4.11191819785702	47.3777698688742	2.86811034590087	11.7476242879545	32.204942644134	5.61470277318741	7.43988261256371	3.93959633262548	17.8755054221024	-2.17578808370699	0.00314140543334658	1	Igkv16-104	6	68402559	68403056	+	378	IG_V_gene	immunoglobulin kappa variable 16-104 [Source:MGI Symbol;Acc:MGI:2685913]	-	7	3	2	1	7	4	49	3	11	34	6	7	0.607203314090211	0.235135778755634	0.222450072700306	0.0963916839221826	0.657599685527712	0.383946435845602	4.40884125382162	0.267895294442841	1.11307656890647	2.99966966253417	0.520854192238963
ENSMUSG00000070476	486.947504343297	350.32977138771	480.063048772944	537.828193979448	457.255167989476	560.248854458019	668.123244477389	662.533489903101	515.827502825636	548.431229145693	688.736873510989	685.532040729085	478.778756821816	628.197396765315	-0.392806599893046	0.00314931665002908	0.0965312325263369	Fam217b	2	178056317	178066221	+	4559	protein_coding	family with sequence similarity 217, member B [Source:MGI Symbol;Acc:MGI:1918782]	-	526	397	402	519	459	545	691	693	483	579	736	645	3.78306710537801	2.57994339217247	3.70724097907959	4.14790816740988	3.57518442761348	4.33739884012681	5.15499960972331	5.13096760696645	4.05230097293128	4.23540831762353	5.29742645004085
ENSMUSG00000039253	393.446177463691	285.02900795524	302.129232187948	431.091577447881	388.517462997594	493.430183742843	514.387215719205	477.062354201511	475.244800739976	480.232527075763	539.011466225991	597.316289751544	382.273940299199	513.875775618998	-0.426692700428773	0.00315860974659643	0.096541733823334	Fn3krp	11	121312227	121322114	+	2520	protein_coding	fructosamine 3 kinase related protein [Source:MGI Symbol;Acc:MGI:2679256]	-	425	323	253	416	390	480	532	499	445	507	576	562	5.52988732475013	3.79744282690348	4.22099012948831	6.0148410767442	5.49565451476731	6.91103584522084	7.18011289908092	6.68398759634889	6.75435099768247	6.70955523046245	7.50030036824107
ENSMUSG00000089704	3873.36189766607	4040.70534807134	3655.40545346762	3832.15541683237	3825.40271259169	4894.21063499932	4864.44000429196	5276.36699967563	4267.59151406054	4662.1390498361	5565.10623202425	4791.28440249103	4020.20691060474	4904.48803372992	-0.286855019292833	0.00316213315126496	0.096541733823334	Galnt2	8	124958130	125072463	+	4282	protein_coding	polypeptide N-acetylgalactosaminyltransferase 2 [Source:MGI Symbol;Acc:MGI:894694]	-	4184	4579	3061	3698	3840	4761	5031	5519	3996	4922	5947	4508	32.0385539402816	31.6820476637501	30.0546048830536	31.4667298039513	31.8449020997259	40.3416788207044	39.9602168142635	43.5060206407719	35.6946371791941	38.3337459258965	45.5730388880061
ENSMUSG00000032309	1091.46598406986	936.271756781764	976.844711184747	1183.42928232087	1099.80327987011	1297.31019142389	1440.67096131883	1357.57223039308	1242.04427699009	1322.29705680032	1254.88606980739	1400.82361190842	1097.52086760854	1336.38236786969	-0.284167941139492	0.00317952920720475	0.0968817570833118	Fbxo22	9	55116209	55131717	+	2394	protein_coding	F-box protein 22 [Source:MGI Symbol;Acc:MGI:1926014]	-	1179	1061	818	1142	1104	1262	1490	1420	1163	1396	1341	1318	16.1479558040382	13.1304769084067	14.3655915370145	17.3809425851262	16.3757154772014	19.1265948172559	21.1681207353197	20.0216483215176	18.581455257965	19.4467748400822	18.3806703103276
ENSMUSG00002076126	0	0	0	0	0.996198623070754	0	10.6358258889309	1.91207356393391	4.27186337743798	6.63042936790994	0	3.18852111967016	0.166033103845126	4.43978555298049	-4.10401817979046	0.00322316926491552	1	ENSMUSG00002076126	13	62284576	62284645	+	70	snoRNA	-	-	0	0	0	0	1	0	11	2	4	7	0	3	0	0	0	0	0.507291185978521	0	5.34459531585723	0.964423059994229	2.18567762621635	3.33492686011151	0
ENSMUSG00000022365	4317.72463927212	3238.56488915087	3770.04737556265	4687.0846269153	4355.38038006533	4848.97953482289	5628.28568176972	5681.72659522962	5000.21608329116	4779.59237006765	5114.0584425782	5193.03806356947	4202.9635742982	5232.81953941764	-0.316237892199696	0.00325140569035978	0.0980316164007773	Derl1	15	57732898	57755844	-	3328	protein_coding	Der1-like domain family, member 1 [Source:MGI Symbol;Acc:MGI:1915069]	-	4664	3670	3157	4523	4372	4717	5821	5943	4682	5046	5465	4886	45.9518623417981	32.6717207969291	39.8827981455257	49.5193160010974	46.6500584605969	51.4262678575752	59.488697917186	60.277890202554	53.8111467259725	50.5650268513302	53.8844633764765
ENSMUSG00000038894	2082.95035127836	1649.28549804441	2385.98500360284	2504.6835160854	2241.4469019092	1798.96421156245	2255.76198171599	2858.5499780812	2271.56335095265	2956.22429389242	3752.49302008025	3129.00205876965	2110.55258041378	2870.59911391536	-0.44397743607242	0.00325526525163121	0.0980316164007773	Irs2	8	11034681	11058458	-	6323	protein_coding	insulin receptor substrate 2 [Source:MGI Symbol;Acc:MGI:109334]	-	2250	1869	1998	2417	2250	1750	2333	2990	2127	3121	4010	2944	11.6677530700554	8.75740393520151	13.2851559945018	13.9278742076685	12.636147681736	10.0419329160156	12.5490756837612	15.9618651318039	12.8667381688816	16.4610259851463	20.8102790740676
ENSMUSG00000019880	31.4756941970952	104.128244392317	68.0686412439249	68.394336806635	32.8745545613349	30.8393864839277	263.961860698013	99.4278253245635	88.6411650818381	93.7732153461548	145.982272102873	59.5190609005097	55.9634762808724	125.217566575659	-1.16197844279868	0.00327499469036445	0.0984342578876725	Rspo3	10	29328412	29411863	-	3090	protein_coding	R-spondin 3 [Source:MGI Symbol;Acc:MGI:1920030]	-	34	118	57	66	33	30	273	104	83	99	156	56	0.360784881770106	1.13139118399313	0.775551661229902	0.77824586747269	0.379237100197535	0.352261535800091	3.00486073804153	1.13608412245275	1.02740995212921	1.06847171246291	1.65661974152897
ENSMUSG00000070283	269.394912098668	313.267175926038	268.69200491023	350.261906676403	282.920408952094	349.513046817847	469.910125638221	387.194896696617	337.477206817601	366.568023625878	380.864004781213	401.75366107844	305.674909230213	390.627986439662	-0.353790649515965	0.00332750353416383	0.0992416709158419	Ndufaf3	9	108442736	108444633	-	1815	protein_coding	NADH:ubiquinone oxidoreductase complex assembly factor 3 [Source:MGI Symbol;Acc:MGI:1913956]	-	291	355	225	338	284	340	486	405	316	387	407	378	5.25707596562731	5.79483382024214	5.21195005045758	6.78533724773209	5.55644560730192	6.79680384777917	9.10709404685514	7.53206439416981	6.6593924369016	7.11083578437001	7.35824922490317
ENSMUSG00000021273	600.815456879847	985.68855073066	769.056227387503	711.922869487246	635.574721519141	833.691414615511	1301.43833150009	1284.91343496359	795.634554047824	744.502497596744	1423.32715300301	1059.65185210372	756.124873436651	1101.57797053583	-0.542934236637999	0.00337792344609137	0.0998865182327207	Fdft1	14	63382599	63417027	-	4116	protein_coding	farnesyl diphosphate farnesyl transferase 1 [Source:MGI Symbol;Acc:MGI:102706]	-	649	1117	644	687	638	811	1346	1344	745	786	1521	997	5.1700795300305	8.04020402663396	6.57816643556619	6.08152838460056	5.50428191588939	7.14904345723737	11.1221788731352	11.0219778285055	6.92317105242849	6.36844633636455	12.1258044856448
ENSMUSG00000039741	1458.06524589485	776.549619196939	1224.04135570216	1092.23683324535	1481.34735250621	1265.4428253905	1541.22786063236	1476.12079135698	1457.77337755071	1726.75324824283	1941.75137572731	1838.71384567646	1216.280538656	1663.72341653111	-0.45211745547604	0.00338138998345795	0.0998865182327207	Bahcc1	11	120123773	120183108	+	11100	protein_coding	BAH domain and coiled-coil containing 1 [Source:MGI Symbol;Acc:MGI:2679272]	-	1575	880	1025	1054	1487	1231	1594	1544	1365	1823	2075	1730	4.65249025796148	2.34881577913736	3.88235498503304	3.45978410583825	4.75711167103641	4.0238105323154	4.88411093647297	4.69526325784578	4.70363732398586	5.47709159097594	6.1341138991386
ENSMUSG00000001552	6100.7301399664	5519.67939554188	5043.0503854929	5441.49488744909	6027.99786820113	6704.48262160587	7394.79967259489	8234.3448030814	6063.91006427322	6207.02909255912	8098.27296652731	7360.16958457196	5806.23921637621	7226.42103060131	-0.315657936596645	0.00341047451437277	0.100553780967574	Jup	11	100259784	100288589	-	6436	protein_coding	junction plakoglobin [Source:MGI Symbol;Acc:MGI:96650]	-	6590	6255	4223	5251	6051	6522	7648	8613	5678	6553	8654	6925	33.5735505519177	28.7939032490176	27.5866777774287	29.7274289621029	33.3861602928717	36.7677630295656	40.4158786979113	45.1724912291113	33.7445396719993	33.9555247270211	44.1222416589601
ENSMUSG00000120369	90.7240597445686	119.129771126803	103.894241898622	110.881727853181	108.585649914712	96.63007764964	155.669815283444	139.581370167176	183.690125229833	120.294932817795	212.42292158559	108.409718068785	104.974254697921	153.34481385877	-0.546859407182485	0.00342628834411002	0.10082797961688	ENSMUSG00000120369	2	26527180	26530295	-	3116	lncRNA	novel transcript	-	98	135	87	107	109	94	161	146	172	127	227	102	1.03123232932137	1.2835878037976	1.17385961020896	1.25117395632753	1.24217963703983	1.09454306470362	1.75731092337819	1.58157953676846	2.11132530645418	1.35922885505187	2.39048003954089
ENSMUSG00000032024	1832.07055341328	1771.94504016756	1523.78221451313	2242.5052249933	2054.16156077189	1713.64190895691	2040.14478414948	2390.09195491739	2548.16650464176	2063.95794181082	2570.5980863243	2352.06574594336	1856.35108380268	2327.50416963118	-0.326093592715682	0.00349762917327905	0.101859876838015	Clmp	9	40597258	40696615	+	4591	protein_coding	CXADR-like membrane protein [Source:MGI Symbol;Acc:MGI:1918816]	-	1979	2008	1276	2164	2062	1667	2110	2500	2386	2179	2747	2213	14.1340425535971	12.9582298216958	11.6852427211275	17.1743903974894	15.9491199704072	13.1743972900047	15.6313088483815	18.3809666193629	19.8786689790163	15.8283720936245	19.6339680599145
ENSMUSG00000015854	70.3574340876247	107.658015388667	60.9035211129855	20.7255566080712	92.6464719455801	20.5595909892851	200.146905364428	83.1752000311252	131.359798856218	107.98127827739	189.028326697309	109.472558442009	62.1417650220355	136.860677944747	-1.13677630399483	0.0035045337019231	0.101859876838015	Cd5l	3	87265188	87278380	+	2036	protein_coding	CD5 antigen-like [Source:MGI Symbol;Acc:MGI:1334419]	-	76	122	51	20	93	20	207	87	123	114	202	103	1.22395009873587	1.7752982274222	1.05314157699325	0.357918040496906	1.62203615948928	0.356413931114041	3.45790257754828	1.4423714232232	2.31074218586969	1.86729696489545	3.25559452378833
ENSMUSG00000025578	199.963233722723	158.839694835738	170.768696454057	132.643562291656	203.224519106434	188.120257551959	233.02127629385	255.261820785177	239.224349136527	226.381802704354	241.432219247059	192.374107553433	175.593327327094	231.2825959534	-0.397428756617329	0.00352542064839682	0.101903753214671	Cbx8	11	118927131	118931795	-	3675	protein_coding	chromobox 8 [Source:MGI Symbol;Acc:MGI:1353589]	-	216	180	143	128	204	183	241	267	224	239	258	181	1.92718896749611	1.45112366317762	1.63596139180168	1.26906537003834	1.97118860837368	1.80674222810773	2.23038523137938	2.45239006684247	2.33138946796411	2.16883678793647	2.30366368453119
ENSMUSG00000034522	932.236001661027	823.319084898573	855.037668958777	780.317206293881	918.495130471235	752.481030207835	1211.5172580755	1031.56368774235	940.877908880716	1058.97429047476	1663.82358845454	923.608284331123	843.647687081888	1138.39416965983	-0.432529649862783	0.00360976519574628	0.102685963688639	Zfp395	14	65595838	65636379	+	4733	protein_coding	zinc finger protein 395 [Source:MGI Symbol;Acc:MGI:2682318]	-	1007	933	716	753	922	732	1253	1079	881	1118	1778	869	6.97623110365465	5.84028985399425	6.36020148702645	5.79682031724203	6.9175096435778	5.6114749108776	9.00398469457845	7.69521167561421	7.11973057303836	7.87755805959153	12.3268458671995
ENSMUSG00000048142	1836.69933197168	909.798474309141	1206.12855537481	2688.10469206684	1249.23307333073	1752.70513183656	2923.88522619338	2761.03422632057	1844.37701320885	2082.90202571914	3059.07722759161	2667.7293367907	1607.11154314829	2556.50084263737	-0.66977320324303	0.00361546935915166	0.102685963688639	Nat8l	5	34153328	34163260	+	6670	protein_coding	N-acetyltransferase 8-like [Source:MGI Symbol;Acc:MGI:2447776]	-	1984	1031	1010	2594	1254	1705	3024	2888	1727	2199	3269	2510	9.75312357696684	4.5795425000044	6.36634098617112	14.1701845006875	6.67616496329753	9.27472407939026	15.4197074616418	14.6152747982334	9.9035445364803	10.9947588686435	16.0822126430342
ENSMUSG00000000204	53.6938312773978	22.0610687271858	23.8837337697982	15.5441674560534	57.7795201381037	16.4476727914281	79.285247535667	50.6699494442487	39.5147362413013	82.4067650011664	124.459244805654	49.9534975414992	31.5683323599945	71.0482400949228	-1.16870955838552	0.00362617561650187	0.1028014145931	Slfn4	11	83066012	83081042	+	3964	protein_coding	schlafen 4 [Source:MGI Symbol;Acc:MGI:1329010]	-	58	25	20	15	58	16	82	53	37	87	133	47	0.479758017086413	0.186851085539921	0.212124438649636	0.137876096831174	0.519576744468414	0.146449800958262	0.703558781603075	0.45131301117288	0.357019743434684	0.731933998056765	1.10096803147585
ENSMUSG00000058669	0	0	1.19418668848991	0	0.996198623070754	0	0.966893262630085	9.56036781966956	3.20389753307849	2.84161258624712	18.7156759106247	0	0.365064218593444	5.88140785204166	-4.0332237994	0.00365666407400761	1	Nkx2-9	12	56658174	56660069	-	1264	protein_coding	NK2 homeobox 9 [Source:MGI Symbol;Acc:MGI:1270158]	Homeobox	0	0	1	0	1	0	1	10	3	3	20	0	0	0	0.0332619175161059	0	0.0280936574513421	0	0.026907485048188	0.267047524523718	0.0907817052028151	0.0791517450975834	0.519205919478714
ENSMUSG00000005268	251.805553576762	238.259542253606	255.555951336841	349.225628846	339.703730467127	211.763787189637	554.029839487039	498.095163404784	445.34175709791	244.378682417252	670.956981395895	269.96145479874	274.385698944995	447.12731310027	-0.704889872888634	0.00366300785158766	0.103466603165557	Prlr	15	10177324	10349266	+	15339	protein_coding	prolactin receptor [Source:MGI Symbol;Acc:MGI:97763]	-	272	270	214	337	341	206	573	521	417	258	717	254	0.581433097161289	0.521502000995284	0.586558161577455	0.800505316390322	0.789428294498161	0.487273307686703	1.27050902997726	1.1465059325246	1.03983196279508	0.560930393056112	1.53383562928654
ENSMUSG00000037787	672.098646679151	580.647328899529	595.899157556466	664.254089288682	624.616536665363	772.012641647656	868.270149841816	875.729692281732	723.012876631379	677.250999722229	835.654929409393	870.466265669954	651.588066789475	808.397485592751	-0.31114839216944	0.0036960912845018	0.104210923484159	Coa8	12	111679695	111721487	+	4016	protein_coding	cytochrome c oxidase assembly factor 8 [Source:MGI Symbol;Acc:MGI:1915270]	-	726	658	499	641	627	751	898	916	677	715	893	819	5.92748972250812	4.85424231700002	5.22397629642394	5.8156155953628	5.54407623321645	6.78498171781485	7.60506296529304	7.69905460742405	6.44791227006927	5.93743203431208	7.29649800825992
ENSMUSG00000096498	0	0	2.38837337697982	0	0	0	22.238545040492	12.4284781655704	5.33982922179748	0	0	8.5027229857871	0.398062229496637	8.08492923560783	-4.48759381237383	0.00373103162209807	1	Ighv2-5	12	113649102	113649665	-	480	IG_V_gene	immunoglobulin heavy variable 2-5 [Source:MGI Symbol;Acc:MGI:4439517]	-	0	0	2	0	0	0	23	13	5	0	0	8	0	0	0.175179432251491	0	0	0	1.62969667775192	0.914192692286196	0.398430817279022	0	0
ENSMUSG00000017167	350.861414726444	268.262595722579	409.60603415204	351.298184506807	382.540271259169	318.673660333919	440.903327759319	500.007236968718	398.351259946092	440.449950868303	512.809519951117	390.062416972983	346.87369345016	447.097285411089	-0.368568041606261	0.00373349869056805	0.104563434193979	Cntnap1	11	101061349	101081550	+	5875	protein_coding	contactin associated protein-like 1 [Source:MGI Symbol;Acc:MGI:1858201]	-	379	304	343	339	384	310	456	523	373	465	548	367	2.11523796190132	1.53304525437545	2.45459929582004	2.10243798487767	2.32101907729407	1.91450397244203	2.6398372531089	3.00489601926713	2.42842735406421	2.63955913183294	3.06076087367795
ENSMUSG00000091537	888.725483212101	792.433588680513	988.786578069647	934.722603024011	943.400096048004	1082.46246558586	1292.73629213642	1265.79269932425	1120.29617073311	1008.77246811773	1100.48174354473	1098.97694591298	938.421802436689	1147.84271996154	-0.291318128707596	0.00373777698179949	0.104563434193979	Tma7	9	108903636	108911655	-	1359	protein_coding	translational machinery associated 7 [Source:MGI Symbol;Acc:MGI:1913417]	-	960	898	828	902	947	1053	1337	1324	1049	1065	1176	1034	23.1621926434411	19.5770000696412	25.6156414841915	24.1834606205826	24.7449100209832	28.1132699862709	33.4604773303283	32.8854779986259	29.5243392371351	26.1346365417128	28.3951768908023
ENSMUSG00000042312	522.126221387109	288.55877895159	425.130461102408	477.724079816041	529.977667473641	643.515197964624	847.965391326584	696.950814053911	682.430174545718	636.521219319354	681.250603146739	553.739834449385	481.172067782569	683.143006140282	-0.506080306778439	0.00379288713076302	0.105571790092238	S100a13	3	90421742	90431888	+	715	protein_coding	S100 calcium binding protein A13 [Source:MGI Symbol;Acc:MGI:109581]	-	564	327	356	461	532	626	877	729	639	672	728	521	25.86431347403	13.549740358447	20.9333296385558	23.4923385411352	26.4217115606155	31.7666004270186	41.7170637559409	34.4157403856682	34.1836923848452	31.3436482516775	33.4104289130739
ENSMUSG00000097222	16.6636028102269	45.8870229525464	34.6314139662074	32.1246127425104	30.8821573151934	34.9513046817847	66.7156351214759	51.6259862262157	42.7186337743798	55.8850475295266	84.2205415978111	41.4507745557121	32.5233524114115	57.1027698008535	-0.814675460562487	0.00380770494319233	0.105571790092238	Gata6os	18	10987944	11052936	-	7622	lncRNA	GATA binding protein 6, opposite strand [Source:MGI Symbol;Acc:MGI:1915684]	-	18	52	29	31	31	34	69	54	40	59	90	39	0.0774339571366682	0.202126688848978	0.159964425146993	0.148191780661262	0.144426905480634	0.161849894827069	0.307893363416789	0.239144526815677	0.200731348511079	0.258148366237968	0.387463037259895
ENSMUSG00000031490	2987.41368158901	1711.05649048053	2399.12105717623	3321.27044644341	3151.97244339586	4089.30264776881	5003.67263411069	4869.09533055771	3641.76352926588	3554.85734539514	4372.91767651746	4026.03933377019	2943.35612780898	4244.72430826951	-0.52827773168824	0.00381256093168557	0.105571790092238	Eif4ebp1	8	27750357	27766702	+	2196	protein_coding	eukaryotic translation initiation factor 4E binding protein 1 [Source:MGI Symbol;Acc:MGI:103267]	-	3227	1939	2009	3205	3164	3978	5175	5093	3410	3753	4673	3788	48.1830760959617	26.1598190577886	38.4628939227591	53.1773957900205	51.1634115985987	65.7256503230941	80.149016938619	78.2847142801782	59.3944956031242	56.9944467486271	69.8264814849538
ENSMUSG00000082031	7.40604569343417	0	8.35930681942938	6.21766698242136	4.98099311535377	6.16787729678553	32.8743709294229	11.4724413836035	22.4272827315494	11.3664503449885	15.908324524031	8.5027229857871	5.52198165123737	17.0919321498971	-1.64681942971533	0.00383435986689494	1	Gm8097	X	139346303	139347131	-	829	processed_pseudogene	predicted gene 8097 [Source:MGI Symbol;Acc:MGI:3645746]	-	8	0	7	6	5	6	34	12	21	12	17	8	0.316419579839531	0	0.355007775853444	0.263710903661653	0.214176013380558	0.262602688931793	1.39490479786602	0.488609994206968	0.968922228750915	0.482739714370786	0.67290089250655
ENSMUSG00000002984	867.433101843478	888.619848331043	868.173722532165	948.194214819258	758.107152156844	922.097655869437	1037.47647080208	1058.33271763742	1003.88789369793	967.095483519435	973.215147352484	1117.04523225778	875.437615925371	1026.17549087785	-0.229043525798712	0.00384256653433459	0.105603229789845	Tomm40	7	19435238	19449363	-	4513	protein_coding	translocase of outer mitochondrial membrane 40 [Source:MGI Symbol;Acc:MGI:1858259]	-	937	1007	727	915	761	897	1073	1107	940	1021	1040	1051	6.80772729588665	6.61079057834529	6.7727248702061	7.38732366899298	5.98790194484285	7.21156560028944	8.08638789303701	8.27976323055094	7.96685064286704	7.5447824599465	7.56179186250762
ENSMUSG00000025279	62.9513883941905	46.7694657016338	58.5151477360057	61.14039199381	71.7263008610943	39.0632228796417	119.894764566131	111.856303490134	76.8935407938837	83.3539691965821	54.2754601408116	99.9069950829984	56.694319594396	91.0301722117567	-0.683553902984149	0.00384867037957259	0.105603229789845	Dnase1l3	14	14475200	14505240	+	5151	protein_coding	deoxyribonuclease 1-like 3 [Source:MGI Symbol;Acc:MGI:1314633]	-	68	53	49	59	72	38	124	117	72	88	58	94	0.432857808064308	0.304841143570204	0.399943724185116	0.417341746230347	0.496359459780964	0.267666793073492	0.818748122017627	0.766707907333793	0.53464449796789	0.56974095066941	0.369481890592346
ENSMUSG00000020736	537.864068485657	584.177099895879	464.538621822576	538.864471809851	500.091708781518	637.347320667838	700.997615406812	668.269710594903	776.411168849353	739.766476619666	606.38789950424	584.562205272863	543.813881910553	679.399179374639	-0.320324076672202	0.00386356371925243	0.105660959028813	Nt5c	11	115381246	115382688	-	1140	protein_coding	5',3'-nucleotidase, cytosolic [Source:MGI Symbol;Acc:MGI:1354954]	-	581	662	389	520	502	620	725	699	727	781	648	550	16.7108743651458	17.2045136645306	14.3462735043853	16.6199556067932	15.6370283116537	19.732826031749	21.6298414896136	20.6970264585604	24.392354034682	22.8471743662026	18.6520627578627
ENSMUSG00000035878	320.311476241028	298.265649191552	242.419897763452	354.407017998018	290.88999793666	288.862253399456	350.015361072091	369.030197839245	382.331772280699	332.468672590913	437.011032513087	400.690820705217	299.192715421694	378.591309500209	-0.338028483275231	0.00387077379692084	0.105671441979784	Hykk	9	54824567	54857208	+	8936	protein_coding	hydroxylysine kinase 1 [Source:MGI Symbol;Acc:MGI:2443139]	-	346	338	203	342	292	281	362	386	358	351	467	377	1.26958222028441	1.12063143975436	0.955096456948594	1.3944864962762	1.16036614160709	1.14094736242861	1.37779813322843	1.45807470238608	1.53237134380544	1.30993658001247	1.7148669639506
ENSMUSG00000029401	643.400219617094	372.390840114896	499.170035788783	529.537971336219	558.867427542693	468.758674555701	672.957710790539	736.148322114556	916.314694460447	515.279082306144	771.085847517738	629.201500948245	512.020861492564	706.831193022945	-0.465051959683915	0.00388408459367982	0.105796745644643	Rilpl2	5	124601328	124616429	-	3925	protein_coding	Rab interacting lysosomal protein-like 2 [Source:MGI Symbol;Acc:MGI:1933112]	-	695	422	418	511	561	456	696	770	858	544	824	592	5.80594659307149	3.18538589248269	4.47745239324066	4.74364965173018	5.07549678302586	4.21529167221877	6.03100599394474	6.62196215715783	8.36126103379324	4.62216614496985	6.88881091146728
ENSMUSG00000028300	2649.51284682608	1433.08702451799	2608.10372766197	2802.09525341123	2467.58398934626	2775.54478355349	2982.86571521381	3454.16089324661	3074.67366591099	3283.00974131083	3308.93150099845	3859.17339517412	2455.98793755283	3327.13581864247	-0.438148868370297	0.00388903341764983	0.105796745644643	C9orf72	4	35191285	35226175	-	4603	protein_coding	C9orf72, member of C9orf72-SMCR8 complex [Source:MGI Symbol;Acc:MGI:1920455]	-	2862	1624	2184	2704	2477	2700	3085	3613	2879	3466	3536	3631	20.3871513764966	10.4528402329117	19.9483057156075	21.4041053306691	19.1091068296363	21.282627222682	22.7947259388021	26.4949202805931	23.9235070612308	25.1115717948002	25.2073966319117
ENSMUSG00000056973	7572.68172153644	3511.23969861889	4572.54083022787	9827.02266571696	7217.45902414761	10598.4691549765	17259.044737947	17126.4429121561	6082.06548362733	7238.53446136682	19297.7334314451	13160.089501252	7216.56884920404	13360.6517546324	-0.888617296605012	0.00390200318441926	0.105963346125659	Ces1d	8	93892696	93924466	-	2369	protein_coding	carboxylesterase 1D [Source:MGI Symbol;Acc:MGI:2148202]	-	8180	3979	3829	9483	7245	10310	17850	17914	5695	7642	20622	12382	113.218171338087	49.762035973935	67.9539430400296	145.851888562125	108.599715056567	157.905062352128	256.267387358057	255.248465338025	91.9502306554609	107.579194026898	285.642243393065
ENSMUSG00000020483	5118.50332987469	4575.46565401833	4782.7176874021	5661.18578749465	4706.04229538624	5426.70404162181	6766.31905188533	7028.78242102106	6317.01796938642	5023.02384828949	6499.95424375996	5525.70710038839	5045.10313263297	6193.46743912177	-0.295903739906347	0.00397344087367098	0.107310003786345	Dynll2	11	87870351	87878359	-	2736	protein_coding	dynein light chain LC8-type 2 [Source:MGI Symbol;Acc:MGI:1915347]	-	5529	5185	4005	5463	4724	5279	6998	7352	5915	5303	6946	5199	66.2610616500942	56.1464019074719	61.5433005409843	72.7522575960826	61.312518048018	70.0064439661309	86.9917418070781	90.7037067974104	82.6918696212426	64.638586034983	83.3058307073779
ENSMUSG00000118559	62.0256326825112	49.4167939488961	37.0197873431873	61.14039199381	59.7719173842452	62.7067525173196	71.5501014346263	78.3950161212904	87.5731992374786	87.1427859782449	66.4406494827177	95.6556335901048	55.3468793116616	81.1262309740771	-0.545973153519038	0.00404676396626588	0.108561281514436	A930007A09Rik	16	13572430	13576401	+	3972	protein_coding	RIKEN cDNA A930007A09 gene [Source:MGI Symbol;Acc:MGI:3045309]	-	67	56	31	59	60	61	74	82	82	92	71	90	0.553087006641083	0.417703437789464	0.328130658597959	0.541220376342527	0.53641061961475	0.557215314559913	0.633640111144842	0.696851506088479	0.789639323670811	0.77244025964315	0.586551057876355
ENSMUSG00000020190	11453.449664896	7636.65955060263	10167.3054658031	11758.6445415892	10181.1499277831	10329.1385130168	14882.4210984023	15410.3568885254	12751.5121816524	10645.6279522771	16827.2642112427	11119.4359846631	10254.3912772818	13606.1030527938	-0.408049766794605	0.00408957319544556	0.109142247400521	Mknk2	10	80501161	80513946	-	3892	protein_coding	MAP kinase-interacting serine/threonine kinase 2 [Source:MGI Symbol;Acc:MGI:894279]	-	12372	8654	8514	11347	10220	10048	15392	16119	11940	11239	17982	10462	104.230536409019	65.8769254106521	91.9719025399297	106.228143207033	93.2466892212317	93.6718815280292	134.506231363104	139.79797935294	117.342584788773	96.3032964563035	151.607915042391
ENSMUSG00000024785	564.710984124356	562.998473917781	539.77238319744	670.471756271103	456.258969366405	662.018829854981	775.448396629328	909.190979650576	713.401184032143	609.052297652299	739.269198469676	704.663167447106	576.038566122011	741.837537313521	-0.365095751388172	0.00410116868160104	0.109263321897595	Rcl1	19	29078775	29121329	+	1889	protein_coding	RNA terminal phosphate cyclase-like 1 [Source:MGI Symbol;Acc:MGI:1913275]	-	610	638	452	647	458	644	802	951	668	643	790	663	10.5882886003873	10.0064028494483	10.0600660723355	12.4796869084767	8.60971700501396	12.3696200067187	14.4398470105503	16.9935529655415	13.5259774751028	11.3518156222959	13.7230879553908
ENSMUSG00000062170	0.925755711679272	0	2.38837337697982	0	0.996198623070754	0	2.90067978789026	21.98884598524	8.54372675487596	0	11.2294055463748	2.12568074644677	0.718387951954975	7.79805647013797	-3.49876015296868	0.00415242956151615	1	Fmr1nb	X	67805445	67848173	+	937	protein_coding	Fmr1 neighbor [Source:MGI Symbol;Acc:MGI:2672032]	-	1	0	2	0	1	0	3	23	8	0	12	2	0.0349935741311327	0	0.0897397305023646	0	0.0378979541285981	0	0.108893472041333	0.828559832759183	0.326568695485901	0	0.420240949127701
ENSMUSG00000043110	116.645219671588	222.375572770033	336.760646154155	120.208228326813	456.258969366405	68.8746298141051	538.559547284957	418.744110501527	301.166368109378	746.396905987576	1175.34444718723	364.554248015622	220.187211017183	590.794271181048	-1.4243572044969	0.00417029768067518	0.110214130659654	Lrrn4	2	132710225	132722811	-	3715	protein_coding	leucine rich repeat neuronal 4 [Source:MGI Symbol;Acc:MGI:2445154]	-	126	252	282	116	458	67	557	438	282	788	1256	343	1.1120891922126	2.00969885519485	3.19142502685893	1.13770728307399	4.37786148653334	0.654362546044799	5.09937039924809	3.97970538619422	2.90345062863464	7.07381525105753	11.0939839901708
ENSMUSG00000060675	11635.8235400968	5857.65496844236	9600.0667887704	13286.118063604	10390.351638628	12331.6426753732	14636.8302096942	16997.3779465905	13882.4880108291	12157.3658481606	16510.9692883531	14588.5469628642	10516.9429458191	14795.5963777486	-0.492478495742526	0.00421223041704775	0.110510363772004	Plaat3	19	7534824	7565910	+	6396	protein_coding	phospholipase A and acyltransferase 3 [Source:MGI Symbol;Acc:MGI:2179715]	-	12569	6638	8039	12821	10430	11996	15138	17779	12999	12835	17644	13726	64.4347524326442	30.748083758891	52.843056505431	73.0373171788716	57.9070192124637	68.0503637423645	80.4970986468996	93.8284420618056	77.7366182935836	66.9227427290983	90.5201588767118
ENSMUSG00000038319	1004.44494717201	774.784733698764	738.007373486765	963.738382275311	819.87146678723	1343.56927114978	1366.22018009631	1618.57027187006	1231.3646185465	970.884300301098	1553.40110058185	1177.62713353151	940.736029094977	1319.67793415455	-0.488334540284661	0.00423471252018198	0.110554821300228	Kcnh2	5	24524587	24556602	-	4845	protein_coding	potassium voltage-gated channel, subfamily H (eag-related), member 2 [Source:MGI Symbol;Acc:MGI:1341722]	-	1085	878	618	930	823	1307	1413	1693	1153	1025	1660	1108	7.34283636172248	5.36895788073854	5.36276850186608	6.99391797027948	6.03200107827091	9.78778126128877	9.91901534274207	11.7950234096921	9.1024789067039	7.05531482273334	11.2427103043036
ENSMUSG00000024807	1829.29328627824	1594.57404760099	1575.13224211819	1850.79220510076	1568.01663271337	1781.48855922155	2114.595565372	2007.67724213061	2019.52341168381	1751.38055732364	2302.96392080237	1955.62628673103	1699.88282883885	2025.29449734058	-0.252655201672874	0.0042378367416527	0.110554821300228	Syvn1	19	6096606	6103742	+	4859	protein_coding	synovial apoptosis inhibitor 1, synoviolin [Source:MGI Symbol;Acc:MGI:1921376]	-	1976	1807	1319	1786	1574	1733	2187	2100	1891	1849	2461	1840	13.3342297647009	11.0179428645071	11.4128012087944	13.392631601016	11.5030547172491	12.9405910431736	15.3081273158447	14.588412206128	14.8856836479861	12.6904296446721	16.6196329547861
ENSMUSG00000073481	3435.47944604178	2257.28855216565	3213.55637872635	3435.2610077878	3113.12069709611	3501.29834547525	3937.18936542971	4250.53953262509	4227.00881197488	3608.84798453384	3815.19053438085	3826.22534360419	3159.33407121549	3944.16692875809	-0.320233415616299	0.00425042381563577	0.110554821300228	Mtarc2	1	184545265	184578648	-	6629	protein_coding	mitochondrial amidoxime reducing component 2 [Source:MGI Symbol;Acc:MGI:1914497]	-	3711	2558	2691	3315	3125	3406	4072	4446	3958	3810	4077	3600	18.3556948142697	11.4325150971747	17.067111860809	18.2207764930411	16.7400734549406	18.6422820133227	20.8919958972551	22.6389911548804	22.837676991986	19.1674028315355	20.1813124348725
ENSMUSG00000115724	2.77726713503782	2.64732824726229	2.38837337697982	7.25394481282492	1.99239724614151	5.13989774732128	7.73514610104068	7.64829425573565	21.3593168871899	13.2608587358199	8.42205415978112	9.56556335901048	3.69986809426127	11.331872249763	-1.61468506188986	0.00426529938366244	1	Gm49087	14	44217170	44224923	-	2947	lncRNA	predicted gene, 49087 [Source:MGI Symbol;Acc:MGI:6118476]	-	3	3	2	7	2	5	8	8	20	14	9	9	0.0333786687759125	0.0301599336171121	0.028532788422367	0.0865464525477079	0.0240993437519487	0.0615591078849837	0.0923272781836705	0.0916316446550336	0.259581665821419	0.158428829458979	0.100211851713435
ENSMUSG00000030750	394.37193317537	366.213740871284	348.702513039054	362.697240641246	378.555476766886	552.025018062305	584.970423891201	505.74345766052	477.380732428695	556.956066904435	465.084546379024	523.98030399913	400.427653759358	519.019255210501	-0.374199885367283	0.00427405130362679	0.110554821300228	Nsmce1	7	125066812	125090768	-	1329	protein_coding	NSE1 homolog, SMC5-SMC6 complex component [Source:MGI Symbol;Acc:MGI:1914961]	-	426	415	292	350	380	537	605	529	447	588	497	493	10.5102370484057	9.25150479392933	9.2374526803495	9.59565070195994	10.1534578984414	14.6606003059735	15.4828381986835	13.4358863474742	12.8649083755285	14.7549811418026	12.2712307097022
ENSMUSG00000024987	1.85151142335854	0	1.19418668848991	5.1813891520178	1.99239724614151	3.08393864839277	10.6358258889309	4.78018390983478	10.679658443595	5.68322517249423	10.2936217508436	8.5027229857871	2.21723719306675	8.42920635858093	-1.94020900093546	0.00428103550631254	1	Cyp26a1	19	37686246	37689984	+	1983	protein_coding	cytochrome P450, family 26, subfamily a, polypeptide 1 [Source:MGI Symbol;Acc:MGI:1096359]	-	2	0	1	5	2	3	11	5	10	6	11	8	0.0330700745949283	0	0.0212017467172758	0.0918710451905825	0.0358148088940963	0.0548909806163531	0.188664484170452	0.0851104566308573	0.192886326065487	0.100905502575235	0.182023174594857
ENSMUSG00000083838	0	0	0	0	0	0	2.90067978789026	4.78018390983478	4.27186337743798	0	2.80735138659371	6.37704223934032	0	3.52285345018284	-4.24753743323996	0.00431622472180934	1	Gm11957	11	4079372	4080150	-	779	processed_pseudogene	predicted gene 11957 [Source:MGI Symbol;Acc:MGI:3649800]	-	0	0	0	0	0	0	3	5	4	0	3	6	0	0	0	0	0	0	0.130979696152412	0.216654731064172	0.196402354088761	0	0.126368988874408
ENSMUSG00000096727	496.20506146009	360.036641627672	360.644379923953	410.36602083981	531.970064719782	543.801181666591	809.289660821381	615.68768758672	545.730546467702	622.313156388118	566.149196296397	510.163379147226	450.503891706316	611.555604451257	-0.440920028364474	0.00434083793985874	0.110554821300228	Psmb9	17	34400961	34406738	-	3660	protein_coding	proteasome (prosome, macropain) subunit, beta type 9 (large multifunctional peptidase 2) [Source:MGI Symbol;Acc:MGI:1346526]	-	536	408	302	396	534	529	837	644	511	657	605	480	4.80188325765767	3.30269402029224	3.46912711737379	3.9422618532633	5.18102309614128	5.24417330632229	7.77793938291294	5.93937042958194	5.34027928208735	5.98646706856083	5.4241414036033
ENSMUSG00000060459	170.339050948986	118.247328377716	168.380323077077	224.872289197573	247.057258521547	206.623889442315	478.612165001892	393.887154170386	402.62312332353	275.63642086597	172.184218377747	193.436947926656	189.253356594202	319.39667161103	-0.755490941340926	0.00434315359097209	0.110554821300228	Kng2	16	22804604	22848232	-	2734	protein_coding	kininogen 2 [Source:MGI Symbol;Acc:MGI:3027157]	-	184	134	141	217	248	201	495	412	377	291	184	182	2.20671987154365	1.45209674049382	2.16827797636812	2.89196205757167	3.22113203679119	2.66747277822578	6.1578183046636	5.08667905088397	5.27432631271484	3.54961125198409	2.20839129350185
ENSMUSG00000046916	395.297688887049	159.722137584825	255.555951336841	250.779234957662	492.122119796952	372.12859690606	555.963626012299	531.556450773628	528.64309295795	464.130055753696	568.956547682991	384.748215106866	320.934288244898	505.666331381238	-0.656014951148307	0.00435908978946298	0.110554821300228	Myct1	10	5543775	5556904	+	2845	protein_coding	myc target 1 [Source:MGI Symbol;Acc:MGI:1915882]	-	427	181	214	242	494	362	575	556	495	490	608	362	4.92122812523447	1.8848880739195	3.16246595445925	3.09930603812498	6.16595051358075	4.61666911207107	6.87394029280248	6.59672152811518	6.65498503940215	5.74381076082475	7.0125831210971
ENSMUSG00000015289	370.302284671709	405.041221831131	365.421126677913	382.386519418914	341.696127713268	483.1503882482	467.976339112961	549.721149631	550.00240984514	491.598977420751	423.910059375649	464.46124309862	391.332944760189	491.278363080687	-0.327682241771846	0.00437541321694414	0.110554821300228	Lage3	X	73394882	73397224	-	2021	protein_coding	L antigen family, member 3 [Source:MGI Symbol;Acc:MGI:1913442]	-	400	459	306	369	343	470	484	575	515	519	453	437	6.48965442075633	6.72876923728516	6.36574839413631	6.65260012708257	6.02674981461865	8.43789260172312	8.14515268324605	9.60366852171393	9.74686769236756	8.56421098662977	7.35510034255704
ENSMUSG00000027221	3001.3000172642	1567.21832237928	2199.69188019842	3775.16013616017	3443.8586399556	3708.95021446703	4414.83463716897	4970.43522944621	3764.57960136722	3138.08749941223	5683.01499026119	4946.45909698164	2949.36320173745	4486.23517577291	-0.605136812758401	0.00438362227035998	0.110554821300228	Chst1	2	92430052	92445595	+	2680	protein_coding	carbohydrate sulfotransferase 1 [Source:MGI Symbol;Acc:MGI:1924219]	-	3242	1776	1842	3643	3457	3608	4566	5199	3525	3313	6073	4654	39.6648767877407	19.6334865771719	28.8967624663206	49.5285648924542	45.8057440652769	48.8465824552885	57.9457108159528	65.4818067581529	50.3093240922467	41.2261667445875	74.3575720509086
ENSMUSG00000032531	5863.73667777651	3180.3236677111	4514.02568249187	5888.13063235303	6110.682353916	5816.30829086876	7116.33441295743	7202.78111533905	6199.54172650687	7449.76099694452	8543.70605320018	6306.89477470758	5228.86788418621	7136.5031799426	-0.448771210425366	0.00439126977337062	0.110554821300228	Amotl2	9	102593871	102610617	+	6289	protein_coding	angiomotin-like 2 [Source:MGI Symbol;Acc:MGI:1929286]	-	6334	3604	3780	5682	6134	5658	7360	7534	5805	7865	9130	5934	33.0235956015518	16.9782314638334	25.2699603972893	32.9193310798741	34.6351867443882	32.6425289019498	39.8030544923986	40.4370673699918	35.3056965898002	41.7064712271857	47.6371637516186
ENSMUSG00000024935	126.82853250006	114.717557381366	80.0105081288241	132.643562291656	73.7186981072358	106.909873144283	184.676613162346	180.690951791755	159.126910809565	90.9316027599077	182.477840128591	174.305821208635	105.804788592237	162.034956643467	-0.612687376481594	0.00440133689040423	0.110554821300228	Slc1a1	19	28812449	28891360	+	8257	protein_coding	solute carrier family 1 (neuronal/epithelial high affinity glutamate transporter, system Xag), member 1 [Source:MGI Symbol;Acc:MGI:105083]	-	137	130	67	128	74	104	191	189	149	96	195	164	0.544034167087245	0.466455620203134	0.341151177256143	0.564831686434647	0.31824734690187	0.456997162588177	0.78674005937674	0.772636374211193	0.690220953174171	0.387735228982325	0.774941716320173
ENSMUSG00000002763	1423.81228456272	1552.21679564479	1251.50764953743	1578.25113570462	1458.43478417558	1574.86466977924	2109.76109905885	1983.77632258143	1657.48299044594	1467.21929869893	2116.74294549165	1721.80140462189	1473.18121990073	1842.79734348311	-0.322840567698784	0.00440676560128178	0.110554821300228	Pex6	17	47022389	47036467	+	3796	protein_coding	peroxisomal biogenesis factor 6 [Source:MGI Symbol;Acc:MGI:2385054]	-	1538	1759	1048	1523	1464	1532	2182	2075	1552	1549	2262	1620	13.2848918972129	13.728683664048	11.6072525816373	14.6185758914376	13.6952583611904	14.6431668343286	19.5500883356651	18.4513236912753	15.6383046175016	13.6085397953444	19.5534371757655
ENSMUSG00000039081	1837.62508768335	1122.46717683921	1907.11614151839	1934.73070936345	1499.27892772148	1820.5517821012	2261.56334129177	2025.84194098798	1982.14460713122	2224.98265503149	2667.91960105955	2175.63424398827	1686.96163753785	2223.01439824838	-0.398491516552758	0.00447996411860823	0.111130391974258	Zfp503	14	22034027	22039669	-	4216	protein_coding	zinc finger protein 503 [Source:MGI Symbol;Acc:MGI:1353644]	-	1985	1272	1597	1867	1505	1771	2339	2119	1856	2349	2851	2047	15.4378850183419	8.9387290163005	15.9257051217627	16.1352271175679	12.6762633877697	15.2412437215138	18.8690398280426	16.9654734925218	16.8384272532038	18.5809848064562	22.1897969712089
ENSMUSG00000085766	13.8863356751891	24.7083969744481	32.2430405892276	24.8706679296854	17.9315752152736	28.7834273849992	58.0135957578051	43.021655188513	22.4272827315494	46.4130055753696	41.1744870033743	43.5764553021589	23.7372406281372	42.4377469264617	-0.84782811471287	0.0045565259962969	0.112116739926767	2810430I11Rik	2	27772937	27777064	-	3416	lncRNA	RIKEN cDNA 2810430I11 gene [Source:MGI Symbol;Acc:MGI:3590515]	-	15	28	27	24	18	28	60	45	21	49	44	41	0.143979708551836	0.2428451485509	0.332307588111728	0.255991029432682	0.18711560138552	0.297401132683684	0.597383977182254	0.444662271513733	0.235139498722046	0.478370656163537	0.422660369111946
ENSMUSG00000022894	6647.85176556885	3009.12977438814	5935.10784179486	5481.90972283483	7589.041110553	7467.24344730835	8650.79402075137	10821.380335084	7250.42011735662	8927.39954179302	8517.5041069253	8385.81054473252	6021.71394374134	8758.8847777738	-0.54062423374276	0.00459116512297635	0.112447223004036	Adamts5	16	85653061	85698716	-	10791	protein_coding	a disintegrin-like and metallopeptidase (reprolysin type) with thrombospondin type 1 motif, 5 (aggrecanase-2) [Source:MGI Symbol;Acc:MGI:1346321]	-	7181	3410	4970	5290	7618	7264	8947	11319	6789	9425	9102	7890	21.8198181742209	9.36228697063715	19.3637315160391	17.8618051157886	25.0688627407011	24.4239887863351	28.1991440709701	35.4064184563631	24.0640250742933	29.127685716385	27.6778181854156
ENSMUSG00000062054	895.205773193856	1179.82595552989	950.572604037969	1092.23683324535	945.392493294145	1099.93811792675	1280.16667972223	1318.37472233243	1363.79238324708	1059.92149467017	1290.44585403757	1192.50689875664	1027.19529620466	1250.86800546102	-0.283852526417855	0.00461751144079568	0.112553212164422	Iah1	12	21366390	21373820	+	2631	protein_coding	isoamyl acetate-hydrolyzing esterase 1 homolog [Source:MGI Symbol;Acc:MGI:1914982]	-	967	1337	796	1054	949	1070	1324	1379	1277	1119	1379	1122	12.0512894926502	15.0556607984536	12.7199843167331	14.5965806061591	12.8085722100164	14.7558889625724	17.115410451389	17.6920862754167	18.5649679786659	14.1838964517856	17.1988786237721
ENSMUSG00000027513	21382.1796726561	9067.09924687335	12341.9194255432	31045.8475210603	22594.7809698678	23553.067437325	34159.3720754583	37630.5637750014	23999.3284544466	26240.3978256013	45860.8922513948	30382.3549089637	19997.4823788876	33045.484881811	-0.724639848637396	0.00465314585092553	0.112778560098579	Pck1	2	172994841	173001066	+	3429	protein_coding	phosphoenolpyruvate carboxykinase 1, cytosolic [Source:MGI Symbol;Acc:MGI:97501]	-	23097	10275	10335	29959	22681	22912	35329	39361	22472	27703	49008	28586	220.859447961285	88.777642451438	126.717720547273	318.339987564924	234.882180589827	242.436477034099	350.416091465161	387.466597333085	250.667711661079	269.429801124728	468.982036148897
ENSMUSG00000078816	228.66166078478	105.893129890492	200.623363666305	133.679840122059	218.167498452495	309.421844388741	321.975456455818	331.744763342534	232.81655407037	262.37556213015	378.99243719015	377.308332494302	199.407889550812	317.535517613888	-0.672026212850062	0.00466298071342402	0.112778560098579	Prkcg	7	3337704	3379615	+	3611	protein_coding	protein kinase C, gamma [Source:MGI Symbol;Acc:MGI:97597]	-	247	120	168	129	219	301	333	347	218	277	405	355	2.24283517123656	0.984561887229349	1.95603287410139	1.30164810064067	2.15363441734996	3.0244155066215	3.13643958643116	3.24367711537799	2.30915539850883	2.55822414913013	3.68030869979982
ENSMUSG00000110446	0	0	1.19418668848991	0	0	0	0	1.91207356393391	2.13593168871899	9.47204195415705	4.67891897765618	6.37704223934032	0.199031114748319	4.09600140396774	-3.98824331714593	0.00466692555212224	1	Gm18646	8	73269202	73270264	+	1063	processed_pseudogene	predicted gene, 18646 [Source:MGI Symbol;Acc:MGI:5010831]	-	0	0	1	0	0	0	0	2	2	10	5	6	0	0	0.0395513299532999	0	0	0	0	0.0635085740353679	0.0719649265452232	0.313727832559879	0.154345315668178
ENSMUSG00000007872	2287.54236355948	2643.79847626594	2317.91636235892	2293.28283868308	2234.4735115477	2567.89291456171	3461.4778802157	2777.28685161401	3187.87804541309	2841.61258624712	2998.25128088208	2311.67781176087	2390.81774449614	2929.69740935548	-0.293212785483997	0.00472725016676345	0.113360141312845	Id3	4	135870808	135873066	+	1791	protein_coding	inhibitor of DNA binding 3 [Source:MGI Symbol;Acc:MGI:96398]	bHLH	2471	2996	1941	2213	2243	2498	3580	2905	2985	3000	3204	2175	45.2381725361882	49.5604779101824	45.5642583584782	45.0212133358351	44.472244059457	50.60568374771	67.9841422340907	54.7502594220621	63.7489307646435	55.8614214424039	58.7020996157561
ENSMUSG00000027800	1571.9331984314	865.676336854769	1376.89725182887	1654.93569515449	1885.80399347294	1701.30615436334	2096.22459338202	2240.95021693055	1772.82330163676	2060.16912502916	2624.87354646511	1861.03349351415	1509.42543835097	2109.34571282629	-0.48302787658509	0.00478752685550093	0.11366290402471	Tm4sf1	3	57193032	57209409	-	4163	protein_coding	transmembrane 4 superfamily member 1 [Source:MGI Symbol;Acc:MGI:104678]	-	1698	981	1153	1597	1893	1655	2168	2344	1660	2175	2805	1751	13.37393376785	6.98155010061707	11.6444036734645	13.9775119544963	16.1472868253696	14.4242764112809	17.7122220674447	19.0058294119449	15.2519661401837	17.4236510226821	22.1097162098267
ENSMUSG00000025347	364.747750401633	270.909923969841	310.488539007377	454.925967547163	445.300784512627	412.219799335166	819.925486710312	736.148322114556	745.440159362928	411.086620810416	391.157626532056	406.005022571334	376.432127462301	584.9605396836	-0.635979897571275	0.00478857932750601	0.11366290402471	Mettl7b	10	128794143	128796857	-	1230	protein_coding	methyltransferase like 7B [Source:MGI Symbol;Acc:MGI:1918914]	-	394	307	260	439	447	401	848	770	698	434	418	382	10.5031363500677	7.39473349091497	8.88715168495369	13.004413669443	12.9049928530633	11.8288278155701	23.4482762711962	21.1310581031256	21.7057334993762	11.7671403031577	11.1513612182283
ENSMUSG00000038489	631.365395365263	431.514504303754	556.490996836299	626.948087394154	485.148729435457	791.544253087477	859.568110478146	832.708037093219	917.382660304807	682.934224894724	690.608441102051	751.428143868935	587.168661070401	789.104936290314	-0.426628984920659	0.00482306841911389	0.11366290402471	Polr2l	7	141051773	141055045	-	1650	protein_coding	polymerase (RNA) II (DNA directed) polypeptide L [Source:MGI Symbol;Acc:MGI:1913741]	-	682	489	466	605	487	770	889	871	859	721	738	707	13.5527779704935	8.7803974983331	11.8739804260647	13.3598873916145	10.4809433515199	16.932037820791	18.324747465884	17.8184466569237	19.9128478279377	14.5726197947903	14.6767241296717
ENSMUSG00000038286	603.592724014885	660.949619066486	463.344435134086	667.362922779893	593.734379350169	672.298625349623	883.740442043898	849.916699168624	799.906417425262	638.415627710185	755.177522993707	712.103050059669	610.213784282524	773.209959900224	-0.340655339613583	0.00483101371607258	0.11366290402471	Bphl	13	34221580	34258057	+	2945	protein_coding	biphenyl hydrolase-like (serine hydrolase, breast epithelial mucin-associated antigen) [Source:MGI Symbol;Acc:MGI:1915271]	-	652	749	388	644	596	654	914	889	749	674	807	670	7.25922386502144	7.53504379771958	5.53912011248178	7.96768095094898	7.18648158880268	8.05739951598158	10.5555551260548	10.1894816678168	9.72793530921249	7.63239627747083	8.99176502126354
ENSMUSG00000033763	1532.1257028292	1201.00458150799	1470.04381353108	1398.97507104481	1348.8529356378	1741.39735679245	1979.23050860378	2258.15887900595	1632.91977602567	1475.74413645767	2209.38554124925	1710.11016051643	1448.73324355722	1877.59150030979	-0.374370774238492	0.00483206515115941	0.11366290402471	Mtss2	8	111448108	111468032	+	5311	protein_coding	MTSS I-BAR domain containing 2 [Source:MGI Symbol;Acc:MGI:3039591]	-	1655	1361	1231	1350	1354	1694	2047	2362	1529	1558	2361	1609	10.2176163020603	7.5922602439632	9.74487129813227	9.2616600085652	9.05310838016272	11.5728294651613	13.1087633352593	15.0120230408064	11.0117245497051	9.78312191311192	14.587349861834
ENSMUSG00000081769	81.4665026277759	93.5389314032677	91.9523750137232	92.2287269059169	104.600855422429	105.881893594818	131.497483717692	112.812340272101	99.3208235254331	126.925362185705	177.798921150935	145.609131131604	94.9448808279885	132.327343663911	-0.480515809462684	0.00483906284335447	0.11366290402471	Gm12216	11	53674244	53750082	-	2647	protein_coding	predicted gene 12216 [Source:MGI Symbol;Acc:MGI:3650088]	-	88	106	77	89	105	103	136	118	93	134	190	137	1.09007561335727	1.18642745034388	1.22301318776258	1.22508841349077	1.408609828841	1.41184081348816	1.7474515714861	1.50474772866497	1.34385732401477	1.68825160277651	2.35535499852678
ENSMUSG00000026255	140.714868175249	95.3038169014425	206.594297108755	146.115174086902	142.456403099118	143.917136924996	195.312439051277	223.712606980268	252.039939268841	200.80728942813	207.744002607934	161.551736729955	145.850282716077	206.861335677734	-0.508388277369213	0.00489504816250043	0.113940527078713	Efhd1	1	87192085	87238561	+	2125	protein_coding	EF hand domain containing 1 [Source:MGI Symbol;Acc:MGI:1921607]	-	152	108	173	141	143	140	202	234	236	212	222	152	2.34537637743645	1.50575420108549	3.42280001274443	2.41763951514564	2.38963989253882	2.3904053394058	3.23305145523941	3.71699993475423	4.24792875118754	3.32707997338184	3.42807846242548
ENSMUSG00000022878	41093.3702857312	17353.2366608043	31073.931821196	46281.2041836534	36577.4248432889	47470.0396351604	56431.7583801423	60787.686707805	48392.7363054618	42035.9749883536	62115.4567797723	58327.6168421263	36641.534571639	54681.8716672769	-0.577587873707085	0.00495501681619176	0.114094169193192	Adipoq	16	22965286	22976778	+	1381	protein_coding	adiponectin, C1Q and collagen domain containing [Source:MGI Symbol;Acc:MGI:106675]	-	44389	19665	26021	44661	36717	46178	58364	63583	45313	44379	66378	54879	1053.92468290668	421.880580190385	792.181434893448	1178.32782067717	944.123630188366	1213.23209240999	1437.37984800398	1554.11433731098	1255.02764651917	1071.69239047711	1577.20155906125
ENSMUSG00000010095	3242.92225801249	2492.0183234229	2987.85509460176	3124.37765866673	2741.53861069071	4084.16275002149	4136.3693775315	4400.6373073939	3659.91894861999	3411.82951188737	3963.98015787031	4136.57473258542	3112.14578256935	3951.55167264808	-0.344592311696524	0.00495605583573436	0.114094169193192	Slc3a2	19	8684246	8700733	-	3529	protein_coding	solute carrier family 3 (activators of dibasic and neutral amino acid transport), member 2 [Source:MGI Symbol;Acc:MGI:96955]	-	3503	2824	2502	3015	2752	3973	4278	4603	3427	3602	4236	3892	32.5474052989324	23.708402759973	29.8078054628437	31.1291330166035	27.6918600359598	40.8478643861087	41.2296172824289	44.0275933920006	37.1438230201927	34.0391231230424	39.3877349318299
ENSMUSG00000034190	1365.48967472693	1034.22290193047	1283.75069012665	1355.45140216786	1221.33951188474	1428.89157375532	1586.67184397597	1639.60308107333	1453.50151417327	1546.78445111385	1527.19915430698	1431.6459827319	1281.52429243199	1530.90100456255	-0.257047608357198	0.00498677534208744	0.114364418712673	Chmp7	14	69954449	69969990	-	6302	protein_coding	charged multivesicular body protein 7 [Source:MGI Symbol;Acc:MGI:1913922]	-	1475	1172	1075	1308	1226	1390	1641	1715	1361	1633	1632	1347	7.67434845561493	5.50983350053982	7.17173810233016	7.56241858640768	6.90824017465513	8.00274263416361	8.85626011846917	9.18589244305833	8.26045332631036	8.64159879809918	8.49764275297386
ENSMUSG00000034165	3012.40908580435	2138.15878103884	2420.61641756905	2877.74353503069	2819.24210329023	3204.21225568008	3091.15776062838	3492.40236452529	3524.28728638634	3325.63393010454	3269.62858158614	3503.12187014428	2745.39702973554	3367.70529889583	-0.294721856461149	0.00501110910247513	0.114574531458216	Ccnd3	17	47815976	47910616	+	8775	protein_coding	cyclin D3 [Source:MGI Symbol;Acc:MGI:88315]	-	3254	2423	2027	2777	2830	3117	3197	3653	3300	3511	3494	3296	12.1590128249203	8.18079578148575	9.71182794321428	11.5308181154665	11.4523514464211	12.8881958211003	12.3912663634881	14.0520011778418	14.3843741212529	13.3435079268963	13.0656941884929
ENSMUSG00000025477	2377.34066759237	2146.10076578063	2499.43273900938	2612.45641044738	2282.2910454551	2891.70647264295	2861.03716412242	3450.33674611875	2849.33287275113	2640.80529681899	3144.23355298495	2956.82191830746	2468.22135015463	2983.76125851728	-0.273895243602006	0.00503049384868968	0.11461584879241	Inpp5a	7	138969025	139159568	+	5649	protein_coding	inositol polyphosphate-5-phosphatase A [Source:MGI Symbol;Acc:MGI:2686961]	-	2568	2432	2093	2521	2291	2813	2959	3609	2668	2788	3360	2782	14.9056643603324	12.755023359116	15.5772937526233	16.260452910858	14.4015378819925	18.067605792385	17.8153177195241	21.5650732560048	18.0650182984672	16.45915398476	19.5175102519284
ENSMUSG00000033318	871.136124690195	976.864123239786	653.220118603982	814.514374697198	848.761226856282	832.663435066047	1197.01385913605	1006.70673141121	1091.4610929354	890.371943690763	1135.10574397939	938.488049556251	832.859900525582	1043.19123678484	-0.323925008554349	0.00505198984874033	0.11461584879241	Gstt2	10	75666948	75673258	-	4156	protein_coding	glutathione S-transferase, theta 2 [Source:MGI Symbol;Acc:MGI:106188]	-	941	1107	547	786	852	810	1238	1053	1022	940	1213	883	7.42406862420115	7.89153240914179	5.533579371024	6.89093850499322	7.27979940610177	7.07150623960578	10.1313026089813	8.55240901734536	9.40588169992286	7.5429048327835	9.5772753890061
ENSMUSG00000040746	1162.74917386917	1292.77862741309	1095.06919334525	1195.86461628571	1126.70064269302	1254.13505034639	1481.28047834929	1390.07748097995	1267.67545725472	1297.66974771952	1454.20801825554	1352.99579511337	1187.8828839921	1373.98449627873	-0.209650116202203	0.0050546870247842	0.11461584879241	Rnf167	11	70538061	70542247	+	3539	protein_coding	ring finger protein 167 [Source:MGI Symbol;Acc:MGI:1917760]	-	1256	1465	917	1154	1131	1220	1532	1454	1187	1370	1554	1273	11.6368910920753	12.2644005087602	10.893893599861	11.881098962154	11.3484722220739	12.5078227150719	14.7230702476953	13.8681801421606	12.8290445014352	12.9100022558711	14.4087785048259
ENSMUSG00000053137	228.66166078478	187.077862806535	187.487310092916	179.276064659816	255.026847506113	280.638417003742	404.161383779376	309.755917357294	231.748588226011	258.586745348488	306.937084934245	322.040633086686	219.694693808984	305.538392122016	-0.475837396419844	0.00506689442656192	0.11461584879241	Mapk11	15	89026689	89033831	-	2887	protein_coding	mitogen-activated protein kinase 11 [Source:MGI Symbol;Acc:MGI:1338024]	-	247	212	157	173	256	273	418	324	217	273	328	303	2.80529193049367	2.17559643994475	2.28637374687779	2.18338683006831	3.14882509620197	3.43098099243601	4.9243586907448	3.78820834788173	2.87499507639646	3.15356783100258	3.72806755400968
ENSMUSG00000028998	238.844973613252	362.683969874934	238.837337697982	288.08523685219	261.004039244537	414.275758434095	659.421205113718	502.875347314619	491.264288405368	369.409636212125	354.662058506338	319.914952340239	300.621885952832	449.591247982068	-0.580245603632375	0.00507215300877322	0.11461584879241	Tomm7	5	24043942	24049159	-	1125	protein_coding	translocase of outer mitochondrial membrane 7 [Source:MGI Symbol;Acc:MGI:1913419]	-	258	411	200	278	262	403	682	526	460	390	379	301	7.51960584169317	10.8237701676793	7.47432244273028	9.00375441180323	8.26997364519651	12.9973547462453	20.6182610407292	15.7822475862167	15.6397376809259	11.5610797817199	11.0546093760798
ENSMUSG00000113902	278.652469215461	330.916030907786	367.809500054893	411.402298670213	315.794963513429	441.003226720166	669.090137740019	494.271016276916	472.040903206897	466.971668339943	422.038491784587	393.250938092653	357.596414846991	486.277192573503	-0.444467458469858	0.00510135302261794	0.115063242602637	Ndufb1	12	101934349	101943327	-	1153	protein_coding	NADH:ubiquinone oxidoreductase subunit B1 [Source:MGI Symbol;Acc:MGI:3780865]	-	301	375	308	397	317	429	692	517	442	493	451	370	8.55982885275133	9.63587644943945	11.2309311639464	12.5456326448103	9.76304546128653	13.499896342063	20.412536237493	15.1355032702477	14.6628069720585	14.2594877886815	12.8352386505513
ENSMUSG00000001657	1048.88122133262	450.928244783677	667.55035886586	920.214713398361	1165.55238899278	1022.83965171693	1473.54533224825	1772.49219376674	931.26621628148	1169.7971813384	1737.7505083015	1128.73647636324	879.327763181705	1368.93131804993	-0.638718320391924	0.00511998280111376	0.115063242602637	Hoxc8	15	102899039	102902543	+	2832	protein_coding	homeobox C8 [Source:MGI Symbol;Acc:MGI:96198]	Homeobox	1133	511	559	888	1170	995	1524	1854	872	1235	1857	1062	13.1179071902074	5.34585178353115	8.29875446004944	11.4248651808106	14.670603153828	12.7477130990368	18.3025625415912	22.0979563428762	11.7773448361799	14.5432015262631	21.5166853122276
ENSMUSG00000020473	2526.38733717273	4203.07481390343	5318.90751053407	3790.70430361622	6071.83060761624	2392.10841160332	8904.12005556045	4725.68981326267	4915.84678158676	8380.86272103816	11351.9932235894	3908.06405234239	4050.50216407434	7031.09610789664	-0.795711332327515	0.00512794777082509	0.115063242602637	Aebp1	11	5811947	5822088	+	4058	protein_coding	AE binding protein 1 [Source:MGI Symbol;Acc:MGI:1197012]	-	2729	4763	4454	3658	6095	2327	9209	4943	4603	8848	12131	3677	22.0505479507684	34.7742523387995	46.1458368406983	32.8445280334194	53.3355802113691	20.8059135441354	77.1828146077567	41.116316287408	43.3863472118759	72.7142258705438	98.0937355793998
ENSMUSG00000001105	544.344358467412	661.832061815573	594.704970867976	638.347143528593	573.810406888754	674.354584448552	712.600334558373	734.236248550623	709.129320654705	744.502497596744	676.571684169083	740.799740136701	614.565587669477	719.639970944371	-0.227530901568984	0.00516772237514114	0.115427380439841	Ift20	11	78427187	78432563	+	1525	protein_coding	intraflagellar transport 20 [Source:MGI Symbol;Acc:MGI:1915585]	-	588	750	498	616	576	656	737	768	664	786	723	697	12.6425702485196	14.570708913054	13.7294726181628	14.7177775855163	13.4124463073141	15.6076114432397	16.4368210041773	16.9991421984557	16.6541468961534	17.1885410626075	15.5569754769131
ENSMUSG00000030555	236.993462189894	252.378626239005	283.022245172109	301.556848647436	296.867189675085	292.974171597313	399.326917466225	323.140432304831	299.030436420659	377.934473970866	330.331679822526	340.108919431484	277.298757253474	344.978809902765	-0.317009987114248	0.00518227120740767	0.115445054132754	Ttc23	7	67297158	67412660	+	8474	protein_coding	tetratricopeptide repeat domain 23 [Source:MGI Symbol;Acc:MGI:1914259]	-	256	286	237	291	298	285	413	338	280	399	353	320	0.990556834314736	0.999923639749588	1.1758562787898	1.2512263922672	1.24877202496011	1.22027819015951	1.65760776902002	1.34636827941134	1.26384474492095	1.57025704175654	1.36691956351219
ENSMUSG00000028631	506.388374288562	217.963359024595	411.994407529019	480.832913307252	562.852222034976	420.44363573088	691.328682780511	653.929158865398	470.972937362538	588.213805353153	792.608874814956	647.269787293043	433.412485319214	640.720541078266	-0.564521308009207	0.00518716305245961	0.115445054132754	Kcnq4	4	120553335	120605809	-	4024	protein_coding	potassium voltage-gated channel, subfamily Q, member 4 [Source:MGI Symbol;Acc:MGI:1926803]	-	547	247	345	464	565	409	715	684	441	621	847	609	4.4571499730608	1.8185625513004	3.60458672724241	4.20137431075533	4.98592604509207	3.68780360801452	6.0432178646	5.73764613724201	4.19184072572681	5.14659438401901	6.9068838350058
ENSMUSG00000042842	266.61764496363	350.32977138771	426.324647790898	245.597845805644	385.528867128382	259.050846464992	486.347311102933	285.85499780812	358.836523704791	1112.96492961345	684.057954533333	446.392956753823	322.241603923543	562.409112252742	-0.804066999345004	0.00519088815016455	0.115445054132754	Serpinb6b	13	33149192	33163050	+	2262	protein_coding	serine (or cysteine) peptidase inhibitor, clade B, member 6b [Source:MGI Symbol;Acc:MGI:894688]	-	288	397	357	237	387	252	503	299	336	1175	731	420	4.17472411172898	5.19980633285336	6.6354437468204	3.81757090886501	6.07538383207698	4.04213104475118	7.56302552332341	4.46184231778939	5.68160231748547	17.3233380222415	10.6042874072418
ENSMUSG00000042647	649.880509598849	570.940458659568	669.93873224284	727.467036943299	628.601331157646	775.096580296049	880.839762256007	932.135862417783	746.508125207287	691.459062653465	903.031362687642	825.826969994572	670.320774816375	829.966857536126	-0.308946067230202	0.00521023459433088	0.115554882489886	Acad12	5	121734838	121757001	-	6516	protein_coding	acyl-Coenzyme A dehydrogenase family, member 12 [Source:MGI Symbol;Acc:MGI:2443320]	-	702	647	561	702	631	754	911	975	699	730	965	777	3.53251430793918	2.94179541984603	3.61972970508606	3.92543150381441	3.43877404614353	4.19848609473706	4.75507622205781	5.05078835517235	4.10317703540385	3.73618263947423	4.85962716653895
ENSMUSG00000107770	16.6636028102269	20.2961832290109	22.6895470813083	7.25394481282492	6.97339036149528	24.6715091871421	22.238545040492	16.2526252934383	58.7381214397723	55.8850475295266	27.1377300704058	49.9534975414992	16.4246962470014	38.3675944858557	-1.22375859839968	0.00521147239406915	0.115554882489886	Gm44126	6	76261399	76261912	+	514	processed_pseudogene	predicted gene, 44126 [Source:MGI Symbol;Acc:MGI:5690518]	-	18	23	19	7	7	24	23	17	55	59	29	47	1.14825218150911	1.32572662808137	1.55412103320389	0.496210886494349	0.483604437995088	1.69414497373118	1.52189573019635	1.11640412586881	4.09283018527867	3.82802888612022	1.85136305295834
ENSMUSG00000045838	1057.21302273773	753.606107720666	1129.70060731146	995.862995017821	996.198623070754	1247.96717304961	1139.00026337824	1245.71592690294	1104.27668306772	1507.00187490639	1946.43029470497	1511.35901072366	1030.09142148467	1408.96400894732	-0.452311755194717	0.00522730836012311	0.115554882489886	Ccdc9b	2	118584639	118593142	-	4779	protein_coding	coiled-coil domain containing 9B [Source:MGI Symbol;Acc:MGI:2685199]	-	1142	854	946	961	1000	1214	1178	1303	1034	1591	2080	1422	7.83532412080249	5.29431896572948	8.3223976351493	7.32685714965562	7.43050492121708	9.21688364919753	8.3835593171943	9.20328806257309	8.27575573266056	11.1024662783792	14.281802333332
ENSMUSG00000038520	1391.41083465395	1153.35267305727	1324.35303753531	1476.69590832507	1305.02019622269	1485.43044897585	1772.31535040095	1718.95413397659	1590.20114225129	1357.34361203071	1717.16326479982	1628.27145177823	1356.04384979502	1630.70815920626	-0.266345287999575	0.00525070773349228	0.115554882489886	Tbc1d17	7	44484047	44498503	-	9726	protein_coding	TBC1 domain family, member 17 [Source:MGI Symbol;Acc:MGI:2449973]	-	1503	1307	1109	1425	1310	1445	1833	1798	1489	1433	1835	1532	5.06701988260227	3.98135207865878	4.79392943533383	5.33841050222945	4.78291196321513	5.39058664207347	6.40985759798143	6.24009286093325	5.85577778584542	4.91358234684331	6.19096739602975
ENSMUSG00000121226	68.5059226642661	25.5908397235355	29.8546672122478	62.1766698242136	82.6844857148726	47.2870592753558	153.736028758184	115.680450618002	104.660652747231	58.7266601157737	122.587677214592	54.2048590343927	52.6832740690819	101.599388081362	-0.94695314869772	0.0053003268844385	0.115982065996523	ENSMUSG00000121226	11	69692952	69693780	-	829	lncRNA	novel transcript	-	74	29	25	60	83	46	159	121	98	62	131	51	2.92688111351566	1.03641270877332	1.2678849137623	2.63710903661653	3.55532182211726	2.01328728181041	6.52323126060872	4.92681744158692	4.52163706750427	2.49415519091573	5.18529511284459
ENSMUSG00000035773	119.422486806626	106.775572639579	46.5732808511065	92.2287269059169	61.7643146303867	119.245627737854	158.570495071334	140.537406949143	118.544208723904	191.335247473972	123.523461010123	136.043567772594	91.0016682619115	144.759064500178	-0.666276495010582	0.00533445028610087	0.116298529547261	Kiss1r	10	79752805	79758107	+	3856	protein_coding	KISS1 receptor [Source:MGI Symbol;Acc:MGI:2148793]	-	129	121	39	89	62	116	164	147	111	202	132	128	1.09693420278849	0.929688818181636	0.425228082436192	0.840977445671698	0.570965702060887	1.091499177837	1.4465285323001	1.28681448227964	1.10105777721091	1.74703118709161	1.12329446645727
ENSMUSG00000051319	510.091397135279	377.68549660942	499.170035788783	589.642085499626	516.03088675065	602.396015986054	817.991700185052	784.906197994871	679.226277012639	541.800799777783	639.140332347834	610.070374230224	515.835986294969	678.855946924734	-0.396832287059787	0.00540810642836281	0.116926373696547	Mtln	2	127633308	127634408	-	800	protein_coding	mitoregulin [Source:MGI Symbol;Acc:MGI:1915135]	-	551	428	418	569	518	586	846	821	636	572	683	574	22.5834092593002	15.8505028459173	21.967500804337	25.9151452016886	22.9929730044764	26.5772522222774	35.9666971142119	34.6408707861677	30.408239974735	23.8447270497973	28.0147937973129
ENSMUSG00000003420	5486.95410312304	3270.33282811802	5211.43070856997	5676.7299549507	5701.24471983392	5567.53723989841	7191.75208744257	7079.45237046531	6729.25278530918	6286.59424497404	6940.70841145517	5812.6740011587	5152.37159241568	6673.40565013416	-0.373286212646905	0.005414211865261	0.116926373696547	Fcgrt	7	44742414	44753275	-	2102	protein_coding	Fc fragment of IgG receptor and transporter [Source:MGI Symbol;Acc:MGI:103017]	-	5927	3706	4364	5478	5723	5416	7438	7405	6301	6637	7417	5469	92.4549373459014	52.2350441030522	87.2863606864517	94.9556220888301	96.6821703210538	93.4863906864935	120.349320869917	118.912629197909	114.657092125981	105.299284350904	115.784994891386
ENSMUSG00000043993	330.4947890695	352.094656885885	260.332698090801	262.178291092101	257.019244752254	272.414580608028	354.849827385241	350.865498981873	403.691089167889	333.415876786328	380.864004781213	352.863003910164	289.089043416428	362.758216835451	-0.324682966162378	0.00543248946751825	0.116926373696547	2900052L18Rik	11	120117214	120122464	-	2534	lncRNA	RIKEN cDNA 2900052L18 gene [Source:MGI Symbol;Acc:MGI:1924085]	-	357	399	218	253	258	265	367	367	378	352	407	332	4.61944178730508	4.66504188680376	3.61696444175138	3.63785410426757	3.61550071774747	3.79438777413713	4.92583244831643	4.88871910245693	5.70570540545428	4.63257401246746	5.2704113430147
ENSMUSG00000040482	374.931063230105	352.094656885885	284.216431860599	367.878629793264	353.650511190118	415.303737983559	518.254788769726	469.414059945776	467.769039829459	392.142536902102	422.974275580118	414.507745557121	358.012505157255	447.51040776405	-0.320670030304735	0.00543998943571864	0.116926373696547	Dxo	17	35055995	35058209	+	1961	protein_coding	decapping exoribonuclease [Source:MGI Symbol;Acc:MGI:1890444]	-	405	399	238	355	355	404	536	491	438	414	452	390	6.77181870431051	6.02815713470715	5.10262578796796	6.59602247094222	6.42844771624999	7.47491434355604	9.2962410760263	8.45161156858788	8.5432019403102	7.04059010752762	7.56340845395039
ENSMUSG00000017002	154.601203850438	105.010687141404	275.85712504117	192.747676455062	268.973628229103	48.31503882482	554.029839487039	140.537406949143	363.108387082228	345.729531326732	574.571250456178	229.573520616252	174.250893257	367.924989319595	-1.07933162471492	0.00544915744967021	0.116926373696547	Slpi	2	164195990	164231015	-	1180	protein_coding	secretory leukocyte peptidase inhibitor [Source:MGI Symbol;Acc:MGI:109297]	-	167	119	231	186	270	47	573	147	340	365	614	216	4.64047414107247	2.98781853106947	8.23046417290056	5.74331060440747	8.12525713135088	1.44516787695614	16.5155406871366	4.20504800311043	11.0210015898197	10.3156635927178	17.0743066645657
ENSMUSG00000041930	168.487539525627	104.128244392317	101.505868521642	145.078896256498	93.6426705686508	135.693300529282	118.9278713035	211.284128814697	182.622159385474	167.65514258858	255.468976180027	188.122746060539	124.756086632336	187.346837388803	-0.58590329204791	0.00545984062458957	0.116926373696547	Fam222a	5	114706077	114751281	+	3141	protein_coding	family with sequence similarity 222, member A [Source:MGI Symbol;Acc:MGI:3605543]	-	182	118	85	140	94	132	123	221	171	177	273	177	1.89990263319917	1.11302093554243	1.13774607383967	1.6240203480299	1.06271123964937	1.52478441284242	1.33185626087612	2.37498006018954	2.0823432971832	1.87928065660534	2.85201249675834
ENSMUSG00000026856	610.07301399664	426.219847809229	478.868862084454	521.247748692991	524.000475735216	580.808445447304	678.75907036632	616.643724368687	640.779506615697	632.732402537691	645.690818916552	603.693331990884	523.536398960973	636.383142465972	-0.28160775946038	0.00546505902650776	0.116926373696547	Dolpp1	2	30282266	30290541	+	3233	protein_coding	dolichyl pyrophosphate phosphatase 1 [Source:MGI Symbol;Acc:MGI:1914093]	-	659	483	401	503	526	565	702	645	600	668	690	568	6.68355618163137	4.42619648113528	5.21474437361073	5.66883279643064	5.77743936521161	6.34081660250118	7.38501852546816	6.73425628808219	7.09855090481647	6.89060050279769	7.00325757396466
ENSMUSG00000016458	124.977021076702	127.07175586859	179.128003273487	224.872289197573	512.046092258367	141.861177826067	625.579940921665	304.975733447459	243.496212513965	520.962307478638	716.810387376926	258.270210693283	218.326056583464	445.015798738656	-1.02784231038173	0.00546840631282894	0.116926373696547	Wt1	2	104956874	105003961	+	6195	protein_coding	WT1 transcription factor [Source:MGI Symbol;Acc:MGI:98968]	zf-C2H2	135	144	150	217	514	138	647	319	228	550	766	243	0.714529807864025	0.688668857101245	1.01799185812004	1.27629124542388	2.94630135133288	0.808239785288538	3.55208337890049	1.73814099513084	1.40772457281731	2.96079059412645	4.05736587716996
ENSMUSG00000089665	272.172179233706	137.661068857639	291.381551991538	393.785575553353	377.559278143816	414.275758434095	551.129159699148	518.17193582609	609.808497129272	378.881678166282	440.754167695212	436.827393394812	314.472568702358	489.262138651803	-0.638326580359443	0.00551907798380379	0.117348637515521	Fcor	8	3721188	3722362	-	392	protein_coding	Foxo1 corepressor [Source:MGI Symbol;Acc:MGI:1915484]	-	294	156	244	380	379	403	570	542	571	400	471	411	24.5917342206535	11.7903797633182	26.1696621241003	35.3206670371998	34.332742765332	37.3010818610357	49.4548592538737	46.6711873675779	55.7152644897114	34.0298659195052	39.4268021589458
ENSMUSG00000042357	5.55453427007563	43.2396947052841	31.0488539007377	7.25394481282492	31.8783559382641	10.2797954946426	84.1197138488174	41.1095816245791	25.6311802646279	65.3570894836837	96.3857309397172	31.8852111967016	21.5425298536382	57.4147512263545	-1.41501232514541	0.00554667818181336	0.117612372022314	Gjb5	4	127248602	127251974	-	1721	protein_coding	gap junction protein, beta 5 [Source:MGI Symbol;Acc:MGI:95723]	-	6	49	26	7	32	10	87	43	24	69	103	30	0.114313697713671	0.843537651387148	0.635165402236667	0.148200113688608	0.660274408246302	0.210824742518358	1.71932731887225	0.843379840378451	0.533401861133566	1.33707119899881	1.96387150112646
ENSMUSG00000036813	1.85151142335854	30.8854962180601	8.35930681942938	0	6.97339036149528	6.16787729678553	131.497483717692	63.0984276098191	66.2138823502887	12.3136545404042	2.80735138659371	10.6284037322339	9.0395970198548	47.7598672228385	-2.39468216998256	0.00557383579508226	0.117704507874595	Entpd8	2	24970316	24975728	+	2715	protein_coding	ectonucleoside triphosphate diphosphohydrolase 8 [Source:MGI Symbol;Acc:MGI:1919340]	-	2	35	7	0	7	6	136	66	62	13	3	10	0.0241539439859089	0.381933253890366	0.108398322719155	0	0.09155531533314	0.0801832888119545	1.70368482862752	0.820558846624924	0.873466012686828	0.159683422399446	0.0362583581337621
ENSMUSG00000048878	1599.70586978178	1651.93282629167	1569.16130867574	1430.06340595691	1559.05084510573	1524.49367185549	1642.75165320851	1751.45938456346	1797.38651605703	1879.25312370476	2007.2562414145	1680.35063006617	1555.73465461122	1793.07625816907	-0.204795085400181	0.00559143881443696	0.117793061395953	Hexim1	11	103007057	103010551	+	3495	protein_coding	hexamethylene bis-acetamide inducible 1 [Source:MGI Symbol;Acc:MGI:2385923]	-	1728	1872	1314	1380	1565	1483	1699	1832	1683	1984	2145	1581	16.2115466793664	15.8689403166377	15.8067484277053	14.3867690990464	15.9009297350349	15.3955929418965	16.5335601746625	17.6935068975193	18.4187897814412	18.9313158525358	20.138950291334
ENSMUSG00000055148	2222.73946374193	1146.29313106457	1873.67891424067	1524.36468852364	1887.79639071908	1995.30830551012	3145.30378333567	2248.59851118628	2195.73777600312	2126.47341870826	2369.40457028509	2373.32255340782	1775.03014896667	2409.80676882104	-0.441210549907705	0.00560610536781947	0.117793061395953	Klf2	8	73072877	73075500	+	1847	protein_coding	Kruppel-like factor 2 (lung) [Source:MGI Symbol;Acc:MGI:1342772]	zf-C2H2	2401	1299	1569	1471	1895	1941	3253	2352	2056	2245	2532	2233	42.6238973930981	20.8368237423116	35.7149794307642	29.0186459906457	36.4332300054417	38.1294981168173	59.9014519552025	42.9839232803059	42.5775208398832	40.5355213911768	44.9835286027019
ENSMUSG00000024053	1675.61783813948	1034.22290193047	1985.93246295872	2222.81594621564	3335.27299004088	3678.11082798311	3961.36169699546	4610.96539942663	2638.94360141231	3785.97516907657	5031.70946857145	3041.84914816533	2321.99549454472	3845.13408060796	-0.727782514031087	0.00562739265528466	0.118030367088281	Emilin2	17	71559167	71618973	-	5505	protein_coding	elastin microfibril interfacer 2 [Source:MGI Symbol;Acc:MGI:2389136]	-	1810	1172	1663	2145	3348	3578	4097	4823	2471	3997	5377	2862	10.7807542087515	6.30753328254349	12.7007475023097	14.1971555387729	21.5965054216033	23.5822620952862	25.3121375713763	29.5730126507404	17.168785604298	24.2138104629713	32.0508407765924
ENSMUSG00000105224	2.77726713503782	3.52977099634972	1.19418668848991	0	6.97339036149528	3.08393864839277	3.86757305052034	9.56036781966956	13.8835559766734	11.3664503449885	7.48627036424988	17.0054459715742	2.92642563829425	10.5282772546126	-1.82451651198539	0.00567308435097016	1	Gm3364	5	44858218	44864232	-	1217	lncRNA	predicted gene 3364 [Source:MGI Symbol;Acc:MGI:3781542]	-	3	4	1	0	7	3	4	10	13	12	8	16	0.0808273926726492	0.0973775123195064	0.0345464780117977	0	0.204250354255937	0.0894402749073362	0.111786560726079	0.277360781428086	0.408579835632062	0.328834201490042	0.215702968684008
ENSMUSG00000036186	138.863356751891	79.4198474178688	151.661709438219	166.840730694973	99.6198623070754	163.448748364817	200.146905364428	209.372055250763	163.398774187003	153.447079657344	243.303786838121	213.630915017901	133.309042495807	197.216586052593	-0.567828791893339	0.00567867037836515	0.118623669077887	Dipk1b	2	26518469	26526509	+	2476	protein_coding	divergent protein kinase domain 1B [Source:MGI Symbol;Acc:MGI:1927576]	-	150	90	127	161	100	159	207	219	153	162	260	201	1.9864082569187	1.07691426942201	2.15648994144808	2.36922661556389	1.43418348216868	2.32996250880375	2.8434126203103	2.9855826958222	2.3635508256035	2.18197960960446	3.44571553670203
ENSMUSG00000016942	37.9559841788501	106.775572639579	34.6314139662074	65.2855033154243	54.7909242688915	52.426957022677	391.591771365184	199.811687431094	200.777578739585	32.204942644134	48.6607573676242	60.5819012737331	58.6443925652716	155.604773136892	-1.40619768611565	0.00570338160129171	0.118819170668095	Tmprss6	15	78323867	78352834	-	3359	protein_coding	transmembrane serine protease 6 [Source:MGI Symbol;Acc:MGI:1919003]	-	41	121	29	63	55	51	405	209	188	34	52	57	0.400222726226772	1.06724622890991	0.362979710768198	0.68337944653851	0.581444199469278	0.550887123417052	4.10076801008288	2.10025444592372	2.14077981251914	0.337563302303637	0.507984023154166
ENSMUSG00000117406	106.461906843116	53.8290076943333	117.030295472011	170.985842016587	110.578047160854	125.413505034639	243.657102182781	182.603025355689	148.44725236597	151.552671266513	194.643029470497	156.237534863838	114.049767370257	179.523435917548	-0.657388206060251	0.00572674885474926	0.119145625702505	Ntn3	17	24422822	24428505	-	5109	protein_coding	netrin 3 [Source:MGI Symbol;Acc:MGI:1341188]	-	115	61	98	165	111	122	252	191	139	160	208	147	0.738056876198905	0.353739204446232	0.806463152584668	1.17673699867421	0.771511551194579	0.866415826749647	1.67758610245238	1.26192369466851	1.04064608059723	1.04440849015041	1.33593136329994
ENSMUSG00000015943	247.176775018366	257.67328273353	331.983899400195	235.235067501608	261.004039244537	291.946192047849	428.333715345128	339.39305759827	296.89450473194	363.726411039631	350.918923324213	302.909506368665	270.836542657681	347.029353067974	-0.360307538857234	0.00575422388890161	0.119236454586758	Bola1	3	96103904	96127025	-	1082	protein_coding	bolA-like 1 (E. coli) [Source:MGI Symbol;Acc:MGI:1916418]	-	267	292	278	227	262	284	443	355	278	384	375	285	8.09118057537214	7.99548574119896	10.802191977652	7.64416342941479	8.59863248691873	9.52343294383019	13.9250462732929	11.0748211833903	9.8274691788748	11.835599947161	11.3726250384894
ENSMUSG00000039048	886.873971788742	793.3160314296	801.29926797673	956.484437462486	833.818247510221	926.209574067294	1025.87375165052	1259.10044185048	1002.81992785357	859.114205242045	1171.60131200511	1056.46333098405	866.333588372512	1062.49549493096	-0.294562625635656	0.00583901647644645	0.120325723579459	Foxred1	9	35115502	35122351	-	4520	protein_coding	FAD-dependent oxidoreductase domain containing 1 [Source:MGI Symbol;Acc:MGI:2446262]	-	958	899	671	923	837	901	1061	1317	939	907	1252	994	6.9495225319723	5.89264827494815	6.24134862163277	7.44037171910309	6.57570588196494	7.23250604133979	7.98356987346574	9.83519490053849	7.94605035238942	6.6919881905335	9.08913612102666
ENSMUSG00000055991	314.756941970952	291.206107198852	308.100165630397	283.940125530575	279.931813082882	321.757598982312	348.081574546831	365.206050711377	355.632626171712	311.630180291767	385.542923758869	397.502299585547	299.948792065995	360.59927584435	-0.265540315685716	0.00584126932097652	0.120325723579459	Zkscan5	5	145141372	145158560	+	4114	protein_coding	zinc finger with KRAB and SCAN domains 5 [Source:MGI Symbol;Acc:MGI:107533]	zf-C2H2	340	330	258	274	281	313	360	382	333	329	412	374	2.70983297197284	2.37650599918795	2.63663355493736	2.42670867457178	2.42547827617829	2.76046661464734	2.97617452511606	3.13425773265018	3.09602245181715	2.66696873353595	3.28616709133557
ENSMUSG00000060212	25.9211599270196	107.658015388667	47.7674675395965	45.5962245377566	50.8061297766084	6.16787729678553	152.769135495553	64.0544643917861	71.5537115720862	134.50299574903	193.707245674966	78.6501876185306	47.3194790777389	115.872956750325	-1.29040526492715	0.00585063439671391	0.120325723579459	Pcnx2	8	126478247	126625056	-	9574	protein_coding	pecanex homolog 2 [Source:MGI Symbol;Acc:MGI:2445010]	-	28	122	40	44	51	6	158	67	67	142	207	74	0.0958942355237517	0.377533652708544	0.175655164990006	0.16745210852243	0.189161221427127	0.0227384195868452	0.561285528926648	0.236220187558645	0.267673596901887	0.494630890052052	0.709469346249041
ENSMUSG00000033768	58.3226098357941	49.4167939488961	117.030295472011	84.9747820930919	92.6464719455801	66.8186707151766	167.272534435005	94.6476414147287	103.592686902871	174.28557195649	186.220975310716	75.4616664988605	78.2016040017584	133.580179419778	-0.777805325508802	0.00585343173689081	0.120325723579459	Nrxn2	19	6468761	6594199	+	13812	protein_coding	neurexin II [Source:MGI Symbol;Acc:MGI:1096362]	-	63	56	98	82	93	65	173	99	97	184	199	71	0.149558765894505	0.120121492535458	0.2983072868922	0.216316003102518	0.239101188873456	0.170749419503447	0.426000113702387	0.241943665137562	0.268620603135118	0.444270592427251	0.472773603250788
ENSMUSG00000020744	2246.80911224559	1405.73129929628	1817.55213988164	2766.86180717751	2093.01330707165	2572.00483275957	3013.80629961798	3551.67664500724	2626.12801128	2350.96081302178	3457.72112448791	2743.19100328956	2150.32874973871	2957.24731611741	-0.459806880784249	0.00587562959770405	0.120481750163904	Slc25a19	11	115505004	115519121	-	4026	protein_coding	solute carrier family 25 (mitochondrial thiamine pyrophosphate carrier), member 19 [Source:MGI Symbol;Acc:MGI:1914533]	-	2427	1593	1522	2670	2101	2502	3117	3715	2459	2482	3695	2581	19.7662324734314	11.7227976255025	15.8940742704482	24.1640017176607	18.5313747446252	22.5484131507447	26.3319616124032	31.1473195170764	23.3619404992934	20.5595838718251	30.1160067412685
ENSMUSG00000036241	3054.9938485416	3266.80305712167	3526.43329111071	2990.69781854467	3012.50463616596	3731.56576455525	3925.58664627815	3878.64122443994	3778.4631573439	3854.17387114651	3578.43723411144	3652.98236276878	3263.83306933998	3778.04741601479	-0.211275930920916	0.0058888140737723	0.120481750163904	Ube2r2	4	41135743	41193380	+	4189	protein_coding	ubiquitin-conjugating enzyme E2R 2 [Source:MGI Symbol;Acc:MGI:1914865]	-	3300	3702	2953	2886	3024	3630	4060	4057	3538	4069	3824	3437	25.8304202842864	26.1827534667278	29.6379009847879	25.102520678964	25.6346140482056	31.4411710719255	32.9636925446868	32.6911559808738	32.3051397057019	32.3939302788106	29.9546491192822
ENSMUSG00000056666	2013.51867290242	1502.80000169589	2132.81742564298	2440.43429060038	2028.26039657205	2246.1353155794	2236.42411646339	2516.28881013703	2746.80815169262	2667.32701429063	2491.05646370415	2785.7046182185	2060.66101716552	2573.93486241772	-0.32109080497602	0.0058893200986112	0.120481750163904	Retsat	6	72575458	72585408	+	3537	protein_coding	retinol saturase (all trans retinol 13,14 reductase) [Source:MGI Symbol;Acc:MGI:1914692]	-	2175	1703	1786	2355	2036	2185	2313	2632	2572	2816	2662	2621	20.1628581396368	14.2649039111751	21.2295481595361	24.2598001443844	20.4408085455637	22.4139722757957	22.2413300329104	25.1180809405339	27.8137828543958	26.5511847273792	24.6961756187808
ENSMUSG00000029623	1296.98375206266	991.865649974272	962.514470922869	1119.18005683584	1149.61321102365	1403.19208501871	1609.87728227909	1587.97709484711	1538.93878172203	1322.29705680032	1399.93255811473	1231.83199256591	1153.89153763967	1448.4757943882	-0.327880217088729	0.0059018386151138	0.120481750163904	Pdap1	5	145065579	145077048	-	5245	protein_coding	PDGFA associated protein 1 [Source:MGI Symbol;Acc:MGI:2448536]	-	1401	1124	806	1080	1154	1365	1665	1661	1441	1396	1496	1159	8.75831449460072	6.34906950056966	6.46076441844202	7.50256263954086	7.81296129711056	9.44255684000263	10.7966476135395	10.6895585496214	10.5085463372947	8.87618283453894	9.3592880667565
ENSMUSG00000028603	11334.0271780893	7771.673291213	10674.8348084113	12276.783456791	10693.1960200415	11556.5460950772	14326.45747239	14637.8791686961	14583.0736047289	11338.034219126	13385.4514112788	12320.4456064055	10717.8434749372	13431.8902471042	-0.325683730985975	0.0059700226826363	0.121128699856087	Scp2	4	107901036	108002195	-	3478	protein_coding	sterol carrier protein 2, liver [Source:MGI Symbol;Acc:MGI:98254]	-	12243	8807	8939	11847	10734	11242	14817	15311	13655	11970	14304	11592	115.421354059215	75.0218347444247	108.057201487941	124.110972289553	109.594149315854	117.277973290068	144.894161107584	148.596852071595	150.171072384912	114.77594742822	134.953650674102
ENSMUSG00000054474	405.481001715521	285.911450704328	380.945553628282	476.687801985638	436.33499690499	435.863328972844	520.188575294986	478.018390983478	511.555639448198	497.282202593245	507.194817177929	543.111430717151	403.537355651934	509.558509369165	-0.337245229619543	0.00599082027325781	0.121218179097722	Thnsl2	6	71105150	71121423	-	2164	protein_coding	threonine synthase-like 2 (bacterial) [Source:MGI Symbol;Acc:MGI:3041254]	-	438	324	319	460	438	424	538	500	479	525	542	511	6.63658631463108	4.43585167833641	6.19766050516365	7.74518761570662	7.18740654440917	7.10904149328169	8.45561500567901	7.79916984745795	8.46647074942631	8.0907421513796	8.21861702781499
ENSMUSG00000051606	0	1.76488549817486	1.19418668848991	1.03627783040356	12.9505820999198	0	23.205438303122	8.60433103770261	4.27186337743798	13.2608587358199	29.9450814569995	11.6912441054573	2.82432201949802	15.1631361694232	-2.42319695781763	0.00599183164887328	1	2010001K21Rik	13	47133384	47164671	+	4165	lncRNA	RIKEN cDNA 2010001K21 gene [Source:MGI Symbol;Acc:MGI:1917079]	-	0	2	1	1	13	0	24	9	4	14	32	11	0	0.0142267025801728	0.0100943730469046	0.00874815282655103	0.110836729709593	0	0.195982104783153	0.0729395591592274	0.0367340777515353	0.112098381852488	0.252110936747599
ENSMUSG00000044197	1528.42267998248	852.439695618458	1536.91826808652	1659.0808064761	1571.00522858258	1624.20768815352	2234.49032993813	1962.74351337816	2049.42645532587	1701.17873496661	2242.13797409284	1669.72222633394	1462.01239448328	1976.61653900592	-0.435406564538042	0.00604925275991083	0.121351233538665	Gpr146	5	139363452	139382170	+	6786	protein_coding	G protein-coupled receptor 146 [Source:MGI Symbol;Acc:MGI:1933113]	-	1651	966	1287	1601	1577	1580	2311	2053	1919	1796	2396	1571	7.97739526442656	4.2174751616594	7.97368450248166	8.59624616750054	8.25226554968595	8.44784001416252	11.5826056888008	10.2119980807376	10.8164631421177	8.82630215260872	11.5858972310768
ENSMUSG00000067158	53.6938312773978	56.4763359415956	106.282615275602	68.394336806635	71.7263008610943	46.2590797258915	109.2589386772	67.8786115196539	120.680140412623	133.555791553614	119.780325827998	85.027229857871	67.1387499813694	106.030172974827	-0.665130790377939	0.00607358271465562	0.121351233538665	Col4a4	1	82426144	82564570	-	10612	protein_coding	collagen, type IV, alpha 4 [Source:MGI Symbol;Acc:MGI:104687]	-	58	64	89	66	72	45	113	71	113	141	128	80	0.179208516748072	0.178678375413252	0.352603908112688	0.226609473284076	0.240929850860511	0.153857163440767	0.36216075239378	0.225837853758543	0.407291510162347	0.44310656546902	0.395794214682906
ENSMUSG00000035000	455.471810146202	434.161832551016	620.977078014754	535.755638318641	971.293657493985	399.884044741595	1020.07239207474	847.048588822723	850.100812110158	789.968298976698	1655.40153429475	518.666102133013	569.590676877699	946.876288068681	-0.733622673321829	0.00609076373928754	0.121351233538665	Dpp4	2	62160417	62242575	-	6319	protein_coding	dipeptidylpeptidase 4 [Source:MGI Symbol;Acc:MGI:94919]	-	492	492	520	517	975	389	1055	886	796	834	1769	488	2.55296370450209	2.30677911008375	3.45978685630417	2.9810794781099	5.47913015398545	2.23359122565315	5.67837782267126	4.73283100022488	4.81824486994679	4.40153347259535	9.18620622922231
ENSMUSG00000033022	17337.5529683294	8372.61680334154	11603.9120520565	22429.1973612547	20018.6113306068	22068.6649678986	29931.1478379769	34291.1272955908	23076.60596492	17829.2245703098	31305.7110957019	22736.2812639947	16971.7592472479	26528.3496714157	-0.644405309404532	0.00616765878540674	0.121862163946944	Cdo1	18	46846260	46861462	-	1644	protein_coding	cysteine dioxygenase 1, cytosolic [Source:MGI Symbol;Acc:MGI:105925]	-	18728	9488	9717	21644	20095	21468	30956	35868	21608	18823	33454	21392	373.523113126033	170.98661914417	248.49905739967	479.697084777877	434.051792431074	473.796908155295	640.417522773576	736.446119863476	502.732443781904	381.832897128218	667.733173522642
ENSMUSG00000020515	929.458734525989	825.966413145835	943.40748390703	909.851935094326	964.32026713249	1004.33601982658	1138.03337011561	1135.77169697674	1085.05329786925	1036.24138978478	1098.61017595367	963.996218513612	929.556808938708	1076.28435820228	-0.212213146297918	0.00620822489697276	0.121950651243961	Cnot8	11	57994979	58009420	+	2636	protein_coding	CCR4-NOT transcription complex, subunit 8 [Source:MGI Symbol;Acc:MGI:1916375]	-	1004	936	790	878	968	977	1177	1188	1016	1094	1174	907	12.4886702870694	10.5200960558894	12.6001594669509	12.1361371877199	13.0402317002673	13.4478113084594	15.1862742472575	15.2127127596965	14.7425448384396	13.840705557519	14.6143466488536
ENSMUSG00000049999	486.947504343297	334.445801904136	503.946782542743	543.009583131466	378.555476766886	495.486142841771	590.771783466982	620.467871496555	587.381214397723	574.952946617333	543.690385203648	569.682440047735	457.06521525505	581.157773538329	-0.347778715824856	0.00626638630062309	0.122638119918907	Ppp1r3d	2	178052999	178056265	-	3267	protein_coding	protein phosphatase 1, regulatory subunit 3D [Source:MGI Symbol;Acc:MGI:1917664]	-	526	379	422	524	380	482	611	649	550	607	581	536	5.27915608613968	3.43699846302312	5.4307232624521	5.84404457233993	4.13037819009141	5.3530383245581	6.36080757044867	6.70550040029658	6.43928593582258	6.19620631799109	5.83557575712359
ENSMUSG00000045664	694.316783759454	666.24427556101	730.842253355826	562.698861909133	767.07293976448	818.271721373547	955.290543478524	867.125361244029	828.741495222969	852.483775874135	998.481309831828	746.113942002818	706.574472620575	874.706071275717	-0.308515671002505	0.00626699094617579	0.122638119918907	Cdc42ep2	19	5965664	5974844	-	3411	protein_coding	CDC42 effector protein (Rho GTPase binding) 2 [Source:MGI Symbol;Acc:MGI:1929744]	-	750	755	612	543	770	796	988	907	776	900	1067	702	7.20953803009485	6.55774454207664	7.54334652861301	5.80028692224089	8.01612281566762	8.46708261424154	9.85134223620602	8.97555263544908	8.70170101554325	8.7992793142784	10.2645381578702
ENSMUSG00000018899	853.546766168289	561.233588419606	726.065506601866	766.845594498635	850.753624102424	919.013717221044	1155.43744884295	999.05843715547	896.023343417617	957.623441565278	1211.84001521295	855.586500444827	779.576466168644	1012.59486443985	-0.377753847071578	0.0063454802460525	0.123712388126674	Irf1	11	53660841	53669200	+	3975	protein_coding	interferon regulatory factor 1 [Source:MGI Symbol;Acc:MGI:96590]	IRF	922	636	608	740	854	894	1195	1045	839	1011	1295	805	7.60539335897444	4.74033729971357	6.43073779978303	6.78306461049382	7.62914895542037	8.16023817347019	10.2247089347389	8.8739052627142	8.07326081683561	8.48204039137797	10.690286609765
ENSMUSG00000027559	223950.489968044	101273.542099019	217159.266741825	302942.352106686	217140.417672109	254304.664885116	368050.82109993	442001.617296437	269776.716011963	217956.421386131	403262.925711048	327436.673661541	219461.788912133	338080.862527842	-0.623400393796976	0.00635587524986602	0.123712388126674	Car3	3	14928572	14937583	+	2865	protein_coding	carbonic anhydrase 3 [Source:MGI Symbol;Acc:MGI:88270]	-	241911	114765	181847	292337	217969	247383	380653	462327	252608	230105	430936	308077	2768.59151462595	1186.79059817109	2668.55323280728	3717.83855345303	2701.6274611374	3132.90823651515	4518.81760601904	5447.03619617044	3372.45861834452	2678.47589928782	4935.65577583297
ENSMUSG00000086035	18.5151142335854	14.1190839853989	10.7476801964092	8.29022264322848	10.9581848537783	11.3077750441068	25.1392248283822	22.944882767207	26.6991461089874	20.8384922991455	17.7798921150935	24.4453285841379	12.3230101594179	22.9744944504922	-0.885643397252903	0.00636940488686699	0.123712388126674	Gm12610	4	89213089	89452672	+	14877	lncRNA	predicted gene 12610 [Source:MGI Symbol;Acc:MGI:3652143]	-	20	16	9	8	11	11	26	24	25	22	19	23	0.0440800953967485	0.031863529607539	0.0254344003268952	0.0195932279478847	0.0262562487869504	0.0268274732850375	0.0594399131964543	0.0544542159303053	0.0642759939147444	0.049316657204042	0.0419078085709511
ENSMUSG00000096974	29.6241827737367	12.354198487224	17.9128003273487	25.906945760089	16.9353765922028	29.8114069344634	34.8081574546831	50.6699494442487	55.5342239066938	26.5217174716397	29.0092976614683	45.7021360486056	22.0908184791774	40.3742469978899	-0.867897341387472	0.00643642774260895	0.124066485719809	Gm26881	4	43045966	43053259	+	666	lncRNA	predicted gene, 26881 [Source:MGI Symbol;Acc:MGI:5477375]	-	32	14	15	25	17	29	36	53	52	28	31	43	1.57544643655838	0.622792062650056	0.946915850008059	1.36771983943638	0.906421188159819	1.57988769885116	1.8384357351843	2.68619335779173	2.9864363961815	1.40207135259944	1.52736972588993
ENSMUSG00000024391	1.85151142335854	23.8259542253606	8.35930681942938	1.03627783040356	15.9391779691321	14.3917136924996	146.000882657143	70.7467218655548	64.0779506615697	6.63042936790994	3.74313518212494	11.6912441054573	10.900656993364	50.4817273066266	-2.20803629899755	0.00643897127632465	0.124066485719809	Apom	17	35347973	35351026	-	1013	protein_coding	apolipoprotein M [Source:MGI Symbol;Acc:MGI:1930124]	-	2	27	7	1	16	14	151	74	60	7	4	11	0.0647363849178112	0.789666257973016	0.290524626043934	0.0359684664586229	0.560874756461938	0.501442383636458	5.06976330329453	2.46580032120933	2.26550987909888	0.230449042653313	0.129570835581657
ENSMUSG00000047222	23.1438927919818	0	22.6895470813083	23.8343900992819	34.8669518074764	55.5108956710698	45.443983343614	68.8346483016209	72.6216774164457	71.0403146561779	51.4681087542179	140.294929265487	26.6742795751864	74.9506102895939	-1.49233220879075	0.00650531488697663	0.124280026799193	Rnase2a	14	51492719	51493569	-	690	protein_coding	ribonuclease, RNase A family, 2A (liver, eosinophil-derived neurotoxin) [Source:MGI Symbol;Acc:MGI:1890465]	-	25	0	19	23	35	54	47	72	68	75	55	132	1.18800648408954	0	1.15770755227072	1.2145352174195	1.80125131253243	2.83953429292769	2.31669546629385	3.52224074084849	3.76950199303979	3.62492050012121	2.6155938784174
ENSMUSG00000020682	1457.13949018317	1194.82748226438	1155.97271445823	1665.29847345852	1311.99358658418	1735.22947949566	1575.06912482441	1847.06306276016	1938.35800751248	1602.66949864337	1863.14553690269	1922.67823516111	1420.07687107403	1791.4972443007	-0.335050599763951	0.0065462475687657	0.124485213078806	Mmp28	11	83331594	83353897	-	3874	protein_coding	matrix metallopeptidase 28 (epilysin) [Source:MGI Symbol;Acc:MGI:2153062]	-	1574	1354	968	1607	1317	1688	1629	1932	1815	1692	1991	1809	13.3221096758935	10.3549572531818	10.5053396233006	15.1142857077424	12.0720636126381	15.8093958854794	14.3015019446004	16.8338377172973	17.9201305117958	14.5655556203115	16.8643014700852
ENSMUSG00000022075	401.777978868804	352.094656885885	417.965340971469	420.728799143845	374.570682274603	353.624965015704	506.652069618165	403.447521990056	435.730064498674	517.173490696975	476.313951925399	459.147041232503	386.793737193385	466.410689993629	-0.271401126746152	0.00655122340156571	0.124485213078806	Rhobtb2	14	70022439	70043085	-	10124	protein_coding	Rho-related BTB domain containing 2 [Source:MGI Symbol;Acc:MGI:2180557]	-	434	399	350	406	376	344	524	422	408	546	509	432	1.40561209690025	1.16764284286455	1.4534840289535	1.46118519835732	1.31883682486711	1.2328457859017	1.76035124623436	1.40700598539261	1.54145972453425	1.7985678245959	1.64976603936456
ENSMUSG00000021416	68.5059226642661	67.0656489306447	37.0197873431873	183.42117598143	99.6198623070754	234.37933727785	268.796327011164	304.019696665492	123.884037945701	152.499875461929	345.304220551026	244.453285841379	115.001955750742	239.826240579448	-1.06058912925475	0.00657367432061704	0.124485213078806	Eci3	13	35130597	35147793	-	1418	protein_coding	enoyl-Coenzyme A delta isomerase 3 [Source:MGI Symbol;Acc:MGI:1916373]	-	74	76	31	177	100	228	278	318	116	161	369	230	1.71113148314844	1.5879127061805	0.919136090233493	4.54808321896865	2.50425832288409	5.83392800192478	6.66789491259018	7.56983685312819	3.12900252554245	3.78648254215764	8.53899676091621
ENSMUSG00000103160	49.0650527190014	43.2396947052841	44.1849074741267	68.394336806635	67.7415063688112	44.203120626963	58.9804890204352	83.1752000311252	64.0779506615697	74.8291314378407	96.3857309397172	104.158356575892	52.8047697834702	80.2678097777633	-0.60416203278264	0.00662667849316419	0.125090678531328	C130012C08Rik	14	22042504	22046168	+	3665	TEC	RIKEN cDNA C130012C08 gene [Source:MGI Symbol;Acc:MGI:2145684]	-	53	49	37	66	68	43	61	87	60	79	103	98	0.474165316487362	0.396105947622723	0.424445663954499	0.656147266163878	0.658855674013031	0.42569340847438	0.566077688173394	0.801273729244864	0.62618322169909	0.71885190163386	0.922189045958699
ENSMUSG00000118671	34.2529613321331	67.0656489306447	54.9325876705359	71.5031702978457	48.8137325304669	68.8746298141051	83.1528205861873	95.6036781966956	74.7576091051647	93.7732153461548	141.303353125216	62.7075820201798	57.5737884292886	91.8830430632665	-0.67716298669739	0.00664860663155274	0.125199248235772	Eppk1	15	75973330	76004395	-	12332	protein_coding	epiplakin 1 [Source:MGI Symbol;Acc:MGI:2386306]	-	37	76	46	69	49	67	86	100	70	99	151	59	0.0983775722958353	0.182586783762889	0.156826218947167	0.203867004545764	0.141097045727078	0.197125921063609	0.237183851336217	0.273717216183896	0.217114425244488	0.267724423573662	0.401790944759103
ENSMUSG00000042672	160.155738120514	102.363358894142	144.496589307279	209.328121741519	147.437396214472	196.344093947673	260.094287647493	210.32809203273	133.495730544937	220.698577531859	385.542923758869	316.726431220569	160.0208830376	254.481007122743	-0.670396436947593	0.00667820485184534	0.12560380668495	Dcst1	3	89257526	89272560	-	5241	protein_coding	DC-STAMP domain containing 1 [Source:MGI Symbol;Acc:MGI:1925022]	-	173	116	121	202	148	191	269	220	125	233	412	298	1.08233034921403	0.655742137434142	0.97065649925268	1.40432807051368	1.00277364753625	1.32227460289929	1.74565453847447	1.41691615377897	0.912262890163759	1.48261392559814	2.57952516957728
ENSMUSG00000035916	2.77726713503782	27.3557252217104	25.0779204582881	13.4716117952463	25.9011641998396	2.05595909892851	68.649421646736	34.4173241508104	32.0389753307849	45.4658013799539	102.000433712905	12.7540844786806	16.1066079848418	49.2210067833117	-1.61442045585431	0.00676434337476207	0.126915480118718	Ptprq	10	107352910	107555912	-	7499	protein_coding	protein tyrosine phosphatase, receptor type, Q [Source:MGI Symbol;Acc:MGI:1096349]	-	3	31	21	13	26	2	71	36	30	48	109	12	0.0131173405630903	0.122475043581745	0.117736276643221	0.0631642532062416	0.123119077007722	0.00967674041536455	0.322014313663766	0.162044680036369	0.153017836213306	0.213463780884588	0.476957692773031
ENSMUSG00000036206	618.404815401754	513.581679968885	519.471209493111	567.880251061151	692.358043034174	581.836424996769	863.435683528666	735.19228533259	622.624087261586	792.809911562945	875.893632617236	581.373684153193	582.25540399264	745.221547409369	-0.356379903825579	0.00679747658844123	0.12722870630288	Sh3bp4	1	88998137	89082790	+	5112	protein_coding	SH3-domain binding protein 4 [Source:MGI Symbol;Acc:MGI:2138297]	-	668	582	435	548	695	566	893	769	583	837	936	547	4.28463183604501	3.37303930510722	3.57760812344594	3.90589964287492	4.8278005081876	4.01724237364509	5.94129060311274	5.07774778164019	4.36216275067924	5.46035559842202	6.00816314709452
ENSMUSG00000079057	2746.7171965524	1453.383207747	2059.9720376451	2773.07947415993	2131.86505337141	2741.62145842117	2972.22988932488	3379.59002425319	2699.8176545408	3066.09998056064	2924.32436103511	3621.09715157208	2317.77307131617	3110.52651021445	-0.424473492877177	0.00681466939766959	0.1272682143152	Cyp4v3	8	45757981	45786253	-	3808	protein_coding	cytochrome P450, family 4, subfamily v, polypeptide 3 [Source:MGI Symbol;Acc:MGI:2142763]	-	2967	1647	1725	2676	2140	2667	3074	3535	2528	3237	3125	3407	25.5475054035991	12.8140354724072	19.0452428970896	25.6047498042115	19.955940036655	25.4113960466966	27.4553576219003	31.3348852672757	25.3924312457488	28.3486298481643	26.9283532292663
ENSMUSG00000033819	820.219560547835	810.082443662261	861.008602401226	891.198934147062	833.818247510221	977.608551540507	1105.15899918619	1058.33271763742	876.799958219146	971.831504496514	1069.6008782922	1018.201077548	865.656056634852	1016.65418922991	-0.232694023082488	0.00682355282023219	0.1272682143152	Ppp1r16a	15	76555815	76579119	+	4119	protein_coding	protein phosphatase 1, regulatory subunit 16A [Source:MGI Symbol;Acc:MGI:1920312]	-	886	918	721	860	837	951	1143	1107	821	1026	1143	958	7.05293405179219	6.6029825824488	7.35932239786307	7.60743107779149	7.21587535481465	8.37705127852059	9.4378836703908	9.07175806250944	7.62387067119772	8.30695547092599	9.10565417065684
ENSMUSG00000028128	534.16104563894	459.752672274551	452.596754937676	666.326644949489	678.411262311183	604.451975084982	764.812570740397	784.906197994871	528.64309295795	815.542812252922	874.957848821705	735.485538270584	565.95005919947	750.724676839738	-0.407935712834756	0.00683401249365666	0.1272682143152	F3	3	121517186	121528697	+	2527	protein_coding	coagulation factor III [Source:MGI Symbol;Acc:MGI:88381]	-	577	521	379	643	681	588	791	821	495	861	935	692	7.48683848849338	6.10831948246629	6.3056276840505	9.27122451286987	9.56967583521808	8.44256733446645	10.6461216188443	10.9666389509039	7.49245446660036	11.3627701881916	12.1412410739359
ENSMUSG00000021286	588.780632628017	549.761832681469	665.161985488881	726.430759112896	621.62794079615	660.990850305516	881.806655518638	826.971816401417	790.294724826027	681.987020699308	716.810387376926	718.48009229901	635.459000168821	769.391782853554	-0.276835789452492	0.00683933484575771	0.1272682143152	Zfyve21	12	111780604	111798626	+	1919	protein_coding	zinc finger, FYVE domain containing 21 [Source:MGI Symbol;Acc:MGI:1915770]	-	636	623	557	701	624	643	912	865	740	720	766	676	10.867009181404	9.61838893213118	12.2032238162477	13.3098882867807	11.5468884854308	12.1573367662867	16.1636726024125	15.215168390477	14.7496223342896	12.5124926486727	13.0981665498009
ENSMUSG00000060445	16.6636028102269	15.8839694835738	4.77674675395965	26.9432235904926	29.8859586921226	25.6994887366064	49.3115563941343	47.8018390983478	26.6991461089874	39.7825762074596	29.0092976614683	43.5764553021589	19.975498344497	39.3634784620927	-0.97408394626163	0.00685248807808189	0.1272682143152	Sycp2	2	177987086	178049478	-	5967	protein_coding	synaptonemal complex protein 2 [Source:MGI Symbol;Acc:MGI:1933281]	-	18	18	4	26	30	25	51	50	25	42	31	41	0.098910947091618	0.0893728751831367	0.0281837196181383	0.158762773518889	0.178533851274492	0.152014991567829	0.290692829922305	0.282845710573136	0.160253722384725	0.234735927810765	0.170475655680023
ENSMUSG00000086727	49.9908084306807	42.3572519561967	57.3209610475157	103.627783040356	66.7453077457405	68.8746298141051	99.5900060508988	106.120082798332	75.8255749495242	79.5651524149192	120.716109623529	126.478004413583	64.8194570057658	101.382488375131	-0.648052250187608	0.0068638875290052	0.1272682143152	4931428L18Rik	1	31036923	31261765	-	3751	protein_coding	RIKEN cDNA 4931428L18 gene [Source:MGI Symbol;Acc:MGI:1918238]	-	54	48	48	100	67	67	103	111	71	84	129	119	0.472035420924301	0.379125883741421	0.538007747144008	0.971369142164357	0.634283034454615	0.648082340324295	0.933921432522979	0.998875923241157	0.723994788209494	0.746824463474719	1.12849427361398
ENSMUSG00000047905	59.2483655474734	76.7725191706065	103.894241898622	78.7571151106706	55.7871228919622	95.6020981001758	150.835348970293	116.636487399969	122.816072101342	71.9875188515936	123.523461010123	121.163802547466	78.3435771199185	117.827115146798	-0.592247163226203	0.00686536332794056	0.1272682143152	Gm8566	6	67182603	67183067	+	465	processed_pseudogene	predicted pseudogene 8566 [Source:MGI Symbol;Acc:MGI:3647296]	-	64	87	87	76	56	93	156	122	115	76	132	114	4.51289172794789	5.54313635853603	7.86612160303469	5.95514042089562	4.27651924523828	7.25658763748188	11.4101624338536	8.85609992725883	9.45951875862452	5.45063314770914	9.31488916700907
ENSMUSG00000032584	785.966599215702	1007.74961945785	753.531800437134	728.503314773703	798.951295702744	936.489369561937	946.588504114853	1166.36487399969	800.974383269622	1354.50199944446	1559.01580335504	992.692908590643	835.198666524844	1136.68974546238	-0.44466733559675	0.00688739678749804	0.127382242476079	Mst1r	9	107784072	107797582	+	5007	protein_coding	macrophage stimulating 1 receptor (c-met-related tyrosine kinase) [Source:MGI Symbol;Acc:MGI:99614]	-	849	1142	631	703	802	911	979	1220	750	1430	1666	934	5.55978492865584	6.75737117569515	5.29841686042856	5.11574750057465	5.68790237284485	6.60150922483123	6.65005568559827	8.22465841057591	5.72938263313153	9.52455644090167	10.9182772736204
ENSMUSG00000035642	536.938312773978	300.030534689726	616.200331260794	560.626306248326	491.125921173882	618.843688777482	813.157233871901	850.872735950591	634.37171154954	538.011982996121	762.663793357957	760.993707227945	520.627515820698	726.678527492343	-0.48202934093328	0.00688797318641244	0.127382242476079	Aamdc	7	97199538	97228704	-	3833	protein_coding	adipogenesis associated Mth938 domain containing [Source:MGI Symbol;Acc:MGI:1913523]	-	580	340	516	541	493	602	841	890	594	568	815	716	4.96154651638544	2.62802420085869	5.65985413253969	5.1426836886821	4.56734120222248	5.69849433572149	7.46237995978737	7.83766718466481	5.92750298056847	4.94192135805724	6.97710892264795
ENSMUSG00000002083	230.513172208139	206.491603286459	133.74890911087	164.768175034166	148.433594837542	185.036318903566	436.068861446168	251.43767365731	286.214846288345	206.490514600624	287.285625228089	165.803098222848	178.165295563457	272.216769907231	-0.61026642536396	0.00693208044343061	0.127964682027208	Bbc3	7	16042318	16052130	+	2124	protein_coding	BCL2 binding component 3 [Source:MGI Symbol;Acc:MGI:2181667]	-	249	234	112	159	149	180	451	263	268	218	307	156	3.84390572563887	3.26400343730278	2.21696004657254	2.72755790352685	2.49107677483803	3.07482527011944	7.22174602472234	4.17962065312941	4.82619023867923	3.42285336866436	4.74286296237937
ENSMUSG00000053175	219.404103667987	106.775572639579	165.991949700098	71.5031702978457	128.509622376127	121.301586836782	492.148670678713	217.020349506499	181.554193541114	265.217174716397	204.000867425809	123.289483293913	135.581000919737	247.205123193741	-0.867040238718579	0.00699805034835915	0.128665858379306	Bcl3	7	19542387	19556695	-	2475	protein_coding	B cell leukemia/lymphoma 3 [Source:MGI Symbol;Acc:MGI:88140]	-	237	121	139	69	129	118	509	227	170	280	218	116	3.1397931368592	1.4484363971347	2.36120640804434	1.01579309093267	1.85084420581254	1.72985321459164	6.99459802034869	3.09589543905218	2.62722866181561	3.77284654881303	2.89026726311512
ENSMUSG00000006014	412.887047408955	202.961832290109	477.674675395965	262.178291092101	595.726776596311	191.204196200352	638.149553335856	292.547255281889	479.516664117414	906.47441501283	1519.71288394273	434.701712648365	357.105469830632	711.850414056513	-0.99567478189519	0.00708973353858762	0.129555921472195	Prg4	1	150325163	150341916	-	4280	protein_coding	proteoglycan 4 (megakaryocyte stimulating factor, articular superficial zone protein) [Source:MGI Symbol;Acc:MGI:1891344]	-	446	230	400	253	598	186	660	306	449	957	1624	409	3.41679547115622	1.59211095054632	3.92925829349139	2.15381362154533	4.96149744043478	1.57678189319116	5.24469633799074	2.4133109748921	4.01260793177452	7.45683412412785	12.4508490926058
ENSMUSG00000003199	963.711695858122	761.548092462453	941.01911053005	943.01282566724	873.666192433051	1148.25315675157	1285.96803929801	1182.61749929313	1324.27764700577	1049.5022485206	1135.10574397939	1005.44699306932	938.535178950415	1163.81969519437	-0.310713373830835	0.00709757874594103	0.129555921472195	Mpnd	17	56312711	56323790	+	2305	protein_coding	MPN domain containing [Source:MGI Symbol;Acc:MGI:1915297]	-	1041	863	788	910	877	1117	1330	1237	1240	1108	1213	946	14.8083848582504	11.0924921086031	14.373073417528	14.3847338115195	13.5108919337186	17.5826646227055	19.6246035853405	18.1148357407593	20.5766613834685	16.0307980954601	17.2681807013923
ENSMUSG00000004043	1462.69402445325	795.080916927775	1105.81687354166	1419.70062765288	1083.86410190098	1312.72988466585	1639.85097342062	1704.61358224708	1456.70541170635	1467.21929869893	1740.5578596881	1404.01213302809	1196.6477381904	1568.82654313153	-0.390910295802787	0.00712025863422699	0.129816823791754	Stat5a	11	100750177	100775995	+	7133	protein_coding	signal transducer and activator of transcription 5A [Source:MGI Symbol;Acc:MGI:103036]	STAT	1580	901	926	1370	1088	1277	1696	1783	1364	1549	1860	1321	7.2629450102589	3.74232783106856	5.45799481614627	6.99809300938476	5.41641619572748	6.49562765530938	8.08674605735914	8.43751872409083	7.31419107497326	7.24211650962111	8.55652519929367
ENSMUSG00000000901	444.362741606051	313.267175926038	278.245498418149	553.372361435501	386.525065751452	272.414580608028	1463.87639962195	456.985581780205	515.827502825636	333.415876786328	953.563687646329	416.633426303568	374.697903957536	690.050412494002	-0.880969604816119	0.00715049249044352	0.130061660704554	Mmp11	10	75759056	75772330	-	2778	protein_coding	matrix metallopeptidase 11 [Source:MGI Symbol;Acc:MGI:97008]	-	480	355	233	534	388	265	1514	478	483	352	1019	392	5.6654823258525	3.78604153482343	3.52629008333455	7.00390719332628	4.95969352454162	3.46111541384575	18.5359058699702	5.80806256072838	6.65026642749953	4.2256812626323	12.0364566519671
ENSMUSG00000057880	1222.92329512832	1028.92824543594	1381.67399858283	1648.71802817206	1999.370636503	1731.11756129781	1528.65824821816	2217.04929738137	2412.5348424081	1813.89603422108	1905.25580770159	2815.46414866875	1502.12196085333	2115.47639643318	-0.493998375984538	0.0071750377578198	0.130354940672879	Abat	16	8331293	8439432	+	7748	protein_coding	4-aminobutyrate aminotransferase [Source:MGI Symbol;Acc:MGI:2443582]	-	1321	1166	1157	1591	2007	1684	1581	2319	2259	1915	2036	2649	5.59037702727298	4.45859680842316	6.27824273975142	7.48190061014879	9.19841749072307	7.88596643102703	6.94004744457126	10.1029165803345	11.1519489879192	8.24262382177794	8.62273174110833
ENSMUSG00000025825	2743.93992941736	1978.43664345402	2504.20948576334	2848.72775577939	2655.86552910663	3254.58325360383	3184.9464071035	3491.44632774333	3385.4517266196	3161.76760429762	3085.27917386648	3355.38705826623	2664.29376618743	3277.37971631613	-0.298886551214669	0.00719357624685793	0.130489765245657	Iscu	5	113910809	113916349	+	2176	protein_coding	iron-sulfur cluster assembly enzyme [Source:MGI Symbol;Acc:MGI:1913633]	-	2964	2242	2097	2749	2666	3166	3294	3652	3170	3338	3297	3157	44.6629290625105	30.5257244541528	40.5166841284606	46.0306614800488	43.5067468415954	52.7903411311297	51.4854941481601	56.6509905921242	55.7217216518162	51.1580232493209	49.7183571342589
ENSMUSG00000084773	0	0	0	0	0	0	4.83446631315042	0	5.33982922179748	1.89440839083141	2.80735138659371	4.25136149289355	0	3.18790280087776	-4.10327996702133	0.00725806194395076	1	Gm12159	11	44993693	45007755	-	1447	lncRNA	predicted gene 12159 [Source:MGI Symbol;Acc:MGI:3649482]	-	0	0	0	0	0	0	5	0	5	2	3	4	0	0	0	0	0	0	0.117522671392224	0	0.13216779011329	0.0460943588128751	0.0680314045149717
ENSMUSG00000033053	0	0	0	2.07255566080712	0	0	27.0730113536424	1.91207356393391	0	2.84161258624712	14.0367569329685	0	0.345425943467853	7.64390907279866	-4.40900121465945	0.00729044516168736	1	1700028P14Rik	19	23536117	23630176	-	875	protein_coding	RIKEN cDNA 1700028P14 gene [Source:MGI Symbol;Acc:MGI:1914733]	-	0	0	0	2	0	0	28	2	0	3	15	0	0	0	0	0.0832824149087658	0	0	1.08835395522911	0.0771538447995383	0	0.114340349489538	0.562522527618081
ENSMUSG00000018907	0.925755711679272	0	1.19418668848991	2.07255566080712	0	0	8.70203936367077	0.956036781966956	9.61169259923546	0.947204195415705	7.48627036424988	5.31420186611694	0.698749676829384	5.50290752844262	-3.01368710998608	0.00729792350826644	1	Alox12e	11	70206436	70213454	-	2826	protein_coding	arachidonate lipoxygenase, epidermal [Source:MGI Symbol;Acc:MGI:1274790]	-	1	0	1	2	0	0	9	1	9	1	8	5	0.0116026110972652	0	0.0148772341614854	0.0257863103486094	0	0	0.108315481213088	0.0119443761853496	0.121813243499319	0.0118008735318879	0.0928911935203247
ENSMUSG00000086726	1.85151142335854	0	0	2.07255566080712	0	5.13989774732128	8.70203936367077	1.91207356393391	5.33982922179748	14.2080629312356	16.8441083195622	4.25136149289355	1.51066080524782	8.54291248218225	-2.50414803913909	0.00729954890785357	1	Gm9458	1	31025306	31026034	-	729	processed_pseudogene	predicted gene 9458 [Source:MGI Symbol;Acc:MGI:3779868]	-	2	0	0	2	0	5	9	2	5	15	18	4	0.089956046531883	0	0	0.0999617462896709	0	0.248854171381409	0.419889643221107	0.0926057807950563	0.262341278866846	0.686198942409777	0.810217632371721
ENSMUSG00000028416	2804.11405067651	3078.84275156605	3278.04245990481	3009.35081949194	2799.31813082882	3066.46299605187	3612.313229186	3700.81838299409	3302.15039075956	3355.94446435784	3458.65690828344	3125.81353764998	3006.02186808667	3425.94948553849	-0.189001983365709	0.00732016651456054	0.132215703009198	Bag1	4	40936398	40948294	-	1349	protein_coding	BCL2-associated athanogene 1 [Source:MGI Symbol;Acc:MGI:108047]	-	3029	3489	2745	2904	2810	2983	3736	3871	3092	3543	3696	2941	73.6232893050255	76.6263752719638	85.5509340009505	78.4361068506945	73.968996502576	80.231285851032	94.1922344499618	96.8605324561291	87.6701381427477	87.5881828419207	89.9035262820298
ENSMUSG00000069136	0.925755711679272	2.64732824726229	3.58256006546973	2.07255566080712	2.98859586921226	4.11191819785702	25.1392248283822	7.64829425573565	3.20389753307849	7.57763356332564	7.48627036424988	6.37704223934032	2.72145229204795	9.5720604640187	-1.83131529513244	0.00733756180848654	1	A130006I12Rik	2	22785333	22785748	-	408	pseudogene	RIKEN cDNA A130006I12 gene [Source:MGI Symbol;Acc:MGI:2441774]	-	1	3	3	2	3	4	26	8	3	8	8	6	0.0803651445119396	0.217846383258896	0.309140174561455	0.17860812020875	0.261105757488944	0.35571508026872	2.16737154074424	0.661858962741138	0.281245282785192	0.653907227472846	0.643408119824602
ENSMUSG00000036596	97.2043497263235	153.545038341213	132.55472242238	156.477952390938	320.775956628783	76.0704866603549	353.882934122611	224.668643762235	184.758091074193	422.453071155405	542.754601408116	130.729365906477	156.104751028332	309.874451238173	-0.989527085659902	0.00738766316191407	0.132927432980622	Cpz	5	35659562	35683042	-	2245	protein_coding	carboxypeptidase Z [Source:MGI Symbol;Acc:MGI:88487]	-	105	174	111	151	322	74	366	235	173	446	580	123	1.53356026320334	2.29626584117528	2.07874390876602	2.45071026053913	5.09324870020305	1.19596321864957	5.54478768950242	3.53335397258465	2.9475006741069	6.62528899603446	8.47751099528362
ENSMUSG00000030161	3021.66664292114	2596.14656781522	2894.70853289954	3520.23578988089	3214.73295664932	3722.31394861007	4214.68773180454	3742.88400140063	3727.20079681464	3532.12444470516	3948.07183334628	3655.10804351523	3161.63407312937	3803.34614193108	-0.266713283068578	0.00739862462875296	0.132927432980622	Gabarapl1	6	129510123	129519309	+	2013	protein_coding	gamma-aminobutyric acid (GABA) A receptor-associated protein-like 1 [Source:MGI Symbol;Acc:MGI:1914980]	-	3264	2942	2424	3397	3227	3621	4359	3915	3490	3729	4219	3439	53.1660344402802	43.3000258810151	50.6271169928601	61.4869766553509	56.9259841036702	65.2660303907647	73.6483931141903	65.6483208125729	66.3140889325204	61.7781533102625	68.7737117409537
ENSMUSG00000024854	404.555246003842	340.622901147748	367.809500054893	497.413358593709	431.354003789636	646.599136613017	615.911008295364	602.303172639183	602.332736218755	532.328757823626	662.534927236114	563.305397808395	448.059024367141	596.45266667024	-0.413063716221341	0.0074284756721826	0.132927432980622	Pold4	19	4281953	4283688	+	1164	protein_coding	polymerase (DNA-directed), delta 4 [Source:MGI Symbol;Acc:MGI:1916995]	-	437	386	308	480	433	629	637	630	564	562	708	530	12.3099517232825	9.82479702367611	11.1247969347339	15.0251779474577	13.2096184252654	19.6065018212032	18.6125824065975	18.2693543581381	18.5331943047726	16.1016228125659	19.9589178613632
ENSMUSG00000033938	1191.44760093122	1173.64885628628	1427.05309274544	1352.34256867665	1164.55619036971	1498.79418311888	1814.85865395667	1663.5040006225	1521.85132821228	1363.0268372032	1581.47461444779	1491.16504363241	1301.30708202137	1572.64674634581	-0.273816003170226	0.00752041589022629	0.133956867163191	Ndufb7	8	84293300	84298255	+	4522	protein_coding	NADH:ubiquinone oxidoreductase subunit B7 [Source:MGI Symbol;Acc:MGI:1914166]	-	1287	1330	1195	1305	1169	1458	1877	1740	1425	1439	1690	1403	9.33202475069471	8.71385533035583	11.1104513864944	10.5150494829663	9.17992873697973	11.6984794067322	14.1173732168084	12.9883600958975	12.0533692622225	10.6124718082717	12.2634555169576
ENSMUSG00000025366	8161.46235416446	4059.23664580218	6679.08614872407	7540.99377184671	7485.43645375364	8007.96069032655	8633.38994202403	9937.04631176454	9112.95254991958	9061.90253754205	9617.98585047003	8904.47664686554	6989.02934410294	9211.29230643096	-0.398354122750154	0.00754212330123495	0.134189111011282	Esyt1	10	128345834	128361740	-	7267	protein_coding	extended synaptotagmin-like protein 1 [Source:MGI Symbol;Acc:MGI:1344426]	-	8816	4600	5593	7277	7514	7790	8929	10394	8533	9567	10278	8378	39.7781255702549	18.7539145956743	32.3581746937968	36.4861955848151	36.7173548921126	38.8941913416704	41.7895644103512	48.2795465797854	44.9128630423589	43.904286873107	46.409850204131
ENSMUSG00000035048	506.388374288562	603.590840375803	487.228168903884	553.372361435501	464.228558350971	598.284097788197	932.085105175402	709.379292219482	736.896432608052	551.272841731941	716.810387376926	549.488472956491	535.515400190486	699.322088678049	-0.384819098627055	0.00759337043456528	0.134629654010912	Anapc13	9	102503495	102511624	+	2377	protein_coding	anaphase promoting complex subunit 13 [Source:MGI Symbol;Acc:MGI:1916260]	-	547	684	408	534	466	582	964	742	690	582	766	517	7.54546549919926	8.52542783183657	7.21647875728481	8.18546663149365	6.9616485008916	8.88374843292901	13.7932952887156	10.5368392377157	11.1030952194205	8.16544986363021	10.574413802721
ENSMUSG00000050323	82.3922583394552	103.245801643229	89.5640016367433	103.627783040356	62.7605132534575	89.4342208033902	137.298843293472	146.273627640944	97.1848918367141	114.6117076453	134.752866556498	105.221196949115	88.5040964527719	122.557188987007	-0.471062956507439	0.0076041712302067	0.134629654010912	Ndufaf6	4	11051045	11076205	-	1235	protein_coding	NADH:ubiquinone oxidoreductase complex assembly factor 6 [Source:MGI Symbol;Acc:MGI:1924197]	-	89	117	75	100	63	87	142	153	91	121	144	99	2.36293046762555	2.80677866430409	2.55322249435371	2.95028797753725	1.81146083414192	2.55596406664341	3.91058354358637	4.18176962450939	2.81837378117371	3.26741821921857	3.82606415545901
ENSMUSG00000045414	998.890412901934	663.596947313748	878.921402728575	1009.33460681307	1126.70064269302	764.816784801406	1313.04105065166	1350.87997291931	914.178762771728	1039.08300237103	1870.63180726694	1139.36488009547	907.043466208626	1271.19657934602	-0.487234527952034	0.00760486493921702	0.134629654010912	Dipk2a	9	94399917	94420134	-	3950	protein_coding	divergent protein kinase domain 2A [Source:MGI Symbol;Acc:MGI:1916111]	-	1079	752	736	974	1131	744	1358	1413	856	1097	1999	1072	8.9567869110836	5.64040134396299	7.83384681339326	8.98448583620198	10.1676565047897	6.83405215479306	11.6929167025406	12.0748208688645	8.28897489638504	9.26180953301856	16.6062821286072
ENSMUSG00000015092	1700.61324235482	1675.75878051703	1505.86941418578	1805.195980563	1589.93300242092	2192.68037900726	2492.65083106036	2293.53223993873	2353.79672096833	1917.14129152139	2105.51353994528	1832.33680343712	1745.00846650814	2165.8285711452	-0.311627136015596	0.00761754500576084	0.134629654010912	Edf1	2	25447859	25452094	+	1317	protein_coding	endothelial differentiation-related factor 1 [Source:MGI Symbol;Acc:MGI:1891227]	-	1837	1899	1261	1742	1596	2133	2578	2399	2204	2024	2250	1724	45.7352728558244	42.7197253803914	40.2553556390214	48.1940853928194	43.0330837490663	58.7634830324558	66.5759419272172	61.4865468735121	64.0103159021751	51.2520270680767	56.0600468867677
ENSMUSG00000035413	593.409411186413	842.732825378496	615.006144572304	769.954427989845	822.860062656443	732.949418768014	1027.80753817578	951.256598057122	796.702519892184	836.381304552068	1111.71114909111	829.015491114242	729.485381758586	925.479100147084	-0.343183249436464	0.0076367001433762	0.134629654010912	Tmem98	11	80701001	80712859	+	1633	protein_coding	transmembrane protein 98 [Source:MGI Symbol;Acc:MGI:1923457]	-	641	955	515	743	826	713	1063	995	746	883	1188	780	12.8706279938264	17.3263247138184	13.259141351062	16.5780710326275	17.9617736517318	15.8418462508407	22.1394721067158	20.5670747484991	17.4733750215888	18.0327031076452	23.8718990593588
ENSMUSG00000024357	1064.61906843116	833.908397887622	995.951698200586	1164.7762813736	1007.15680792453	1116.38579071818	1221.1861907018	1296.38587634719	1239.90834530137	1119.59535898136	1211.84001521295	1246.71175779103	1030.46634075595	1222.60459072262	-0.24697905981545	0.00765733877821628	0.134629654010912	Sil1	18	35399449	35632833	-	3436	protein_coding	endoplasmic reticulum chaperone SIL1 homolog (S. cerevisiae) [Source:MGI Symbol;Acc:MGI:1932040]	-	1150	945	834	1124	1011	1086	1263	1356	1161	1182	1295	1173	10.9741926091391	8.14831698964881	10.204864714627	11.9191290836396	10.4484858066647	11.4677738275689	12.501737535055	13.321163686649	12.9241866037982	11.4723036922346	12.3672553183399
ENSMUSG00000103793	67.5801669525869	62.6534351852076	60.9035211129855	93.2650047363204	81.6882870918018	94.5741185507115	96.6893262630085	85.0872735950591	110.000481969028	150.605467071097	98.2572985307797	125.41516404036	76.7774222716023	111.009168578222	-0.53186475601866	0.00765804112566096	0.134629654010912	Pcdhga6	18	37840092	37974926	+	4733	protein_coding	protocadherin gamma subfamily A, 6 [Source:MGI Symbol;Acc:MGI:1935218]	-	73	71	51	90	82	92	100	89	103	159	105	118	0.505724796987875	0.444437920293239	0.453031111506074	0.692847049869565	0.615223200404967	0.7052673385256	0.718594149607218	0.634730156746677	0.832386207744553	1.1203324968471	0.727963338614144
ENSMUSG00000020156	1694.13295237307	1238.94961971875	1474.82056028504	1762.70858951646	1466.40437316015	1981.94457136708	2143.6023632509	1978.04010188963	1799.52244774575	1776.95507059986	2255.23894723028	2105.48677935553	1603.16011107009	2009.80761834533	-0.326302086947249	0.00768306323119602	0.134629654010912	Pwwp3a	10	80062268	80079737	+	10361	protein_coding	PWWP domain containing 3A, DNA repair factor [Source:MGI Symbol;Acc:MGI:1915364]	-	1830	1404	1235	1701	1472	1928	2217	2069	1685	1876	2410	1981	5.79131661986243	4.01471477704725	5.0114065938946	5.98182918105561	5.04500374512371	6.75161710504057	7.27753329415275	6.74053623100879	6.2204583537356	6.03833876032159	7.63259260762878
ENSMUSG00000024431	2577.30390131509	2059.62137637006	2720.35727638002	2964.79087278459	3035.41720449659	2507.24212114332	3538.82934122611	3544.02835075151	2597.29293348229	3011.16213722653	3741.26361453388	3440.4142881241	2644.12212541494	3312.16511089074	-0.325209242255047	0.00768496406438514	0.134629654010912	Nr3c1	18	39543598	39652474	-	7684	protein_coding	nuclear receptor subfamily 3, group C, member 1 [Source:MGI Symbol;Acc:MGI:95824]	ESR-like	2784	2334	2278	2861	3047	2439	3660	3707	2432	3179	3998	3237	11.8798174683844	8.999176257102	12.4640941177167	13.5663141216965	14.081225541041	11.5166692138328	16.1999588273463	16.284366204965	12.1059916413024	13.7971531601959	17.0730906840183
ENSMUSG00000030495	5366.60586060474	2592.61679681887	4339.67442597234	6732.69706413193	5233.03136699067	5564.45330125002	7287.47452044295	7606.22863732911	6676.92245893557	5766.57914169081	7273.84744266429	7182.67524224365	4971.51313596143	6965.62124055106	-0.486609298590281	0.0076869896397712	0.134629654010912	Slc7a10	7	34885810	34900539	+	2111	protein_coding	solute carrier family 7 (cationic amino acid transporter, y+ system), member 10 [Source:MGI Symbol;Acc:MGI:1858261]	-	5797	2938	3634	6497	5253	5413	7537	7956	6252	6088	7773	6758	90.0415495197401	41.2337487759311	72.375411479138	112.138824835261	88.3638285154722	93.0362597860952	121.43124941618	127.216127563237	113.280430641559	96.1773317117901	120.82509572962
ENSMUSG00000080921	87.0210368978516	158.839694835738	75.2337613748644	103.627783040356	102.608458176288	122.329566386246	221.418557142289	146.273627640944	163.398774187003	130.714178967367	108.550920281623	254.018849200389	108.276716785224	170.729151236603	-0.653582997472112	0.00785864579775083	0.136425833916365	Rpl38-ps2	6	140692686	140692898	-	213	processed_pseudogene	ribosomal protein L38, pseudogene 2 [Source:MGI Symbol;Acc:MGI:3646625]	-	94	180	63	100	103	119	229	153	153	138	116	239	14.4702536259245	25.0369927801773	12.4352723739087	17.1061298228099	17.1716875629349	20.2707495037639	36.5658825920578	24.2464107336577	27.4748912872971	21.6065683894549	17.8704339759734
ENSMUSG00000037316	564.710984124356	447.398473787327	523.053769558581	619.694142581329	517.027085373721	603.423995535518	635.248873547966	678.786115196539	639.711540771338	670.620570354319	609.195250890834	683.406359982638	545.884741826805	652.828118457272	-0.258618998262332	0.0078617380873052	0.136425833916365	Bag4	8	26254566	26275315	-	7032	protein_coding	BCL2-associated athanogene 4 [Source:MGI Symbol;Acc:MGI:1914634]	-	610	507	438	598	519	587	657	710	599	708	651	643	2.8443226914294	2.13608416076044	2.61872325345232	3.09851561440641	2.6208601801194	3.02873787201498	3.17765459944506	3.40812187725492	3.25815780955815	3.35769086598258	3.03779763741419
ENSMUSG00000023020	702.648585164567	821.554199400398	823.988815058039	726.430759112896	693.354241657245	859.390903352118	1168.97395451977	957.94885553089	1043.40262993923	824.067650011664	922.682822393798	804.570162530104	771.227917290877	953.607679154243	-0.306480772092356	0.00788995669939087	0.136591016401966	Cox14	15	99623528	99627413	+	2326	protein_coding	cytochrome c oxidase assembly protein 14 [Source:MGI Symbol;Acc:MGI:1913629]	-	759	931	690	701	696	836	1209	1002	977	870	986	757	10.6994131690892	11.8584856675444	12.4719320639926	10.9809439476922	10.6256348155088	13.0406433038152	17.6781482678417	14.540978810833	16.0660460938237	12.4737161147765	13.9098971253224
ENSMUSG00000026579	117.570975383268	196.784733046497	71.6512013093947	42.487391046546	149.429793460613	78.1264457592834	473.777698688742	194.075466739292	213.593168871899	148.711058680266	223.652327131965	91.4042720972113	109.3417566676	224.202332034896	-1.03425321893625	0.00789588634855123	0.136591016401966	F5	1	163979407	164047846	+	7430	protein_coding	coagulation factor V [Source:MGI Symbol;Acc:MGI:88382]	-	127	223	60	41	150	76	490	203	200	157	239	86	0.560457648456348	0.889211993469151	0.339513300729673	0.20106033881911	0.71689871504367	0.371130996264215	2.24299057058489	0.922237663695693	1.02959242150164	0.704688448233523	1.05551838123043
ENSMUSG00000061510	17.5893585219062	10.5893129890492	20.3011737043285	11.3990561344392	9.96198623070754	17.4756523408923	24.1723315657521	26.7690298950748	25.6311802646279	23.6801048853926	23.3945948882809	28.6966900770315	14.5527566535538	25.3906552626933	-0.8114616130561	0.00791237346685535	0.136691550104301	Gm10101	14	47066566	47069484	-	2919	lncRNA	predicted gene 10101 [Source:MGI Symbol;Acc:MGI:3641713]	-	19	12	17	11	10	17	25	28	24	25	25	27	0.213426036401698	0.121796950146803	0.244855115993862	0.137306139687713	0.121652562584777	0.211308649943803	0.291290348586071	0.32378711846329	0.314485989383647	0.285622375823186	0.281036434661311
ENSMUSG00000068290	1691.35568523803	1382.78778782	1495.12173398937	1678.77008525377	1725.41601515855	2128.94564694047	2258.66266150388	2093.72055250763	2090.00915741153	1839.4705474973	2151.36694592631	1938.62084075946	1683.73282573336	2061.97511760102	-0.292440438713442	0.00794333463364553	0.13707344124214	Ddrgk1	2	130495880	130506579	-	2084	protein_coding	DDRGK domain containing 1 [Source:MGI Symbol;Acc:MGI:1924256]	-	1827	1567	1252	1620	1732	2071	2336	2190	1957	1942	2299	1824	28.7454244537006	22.2771969429318	25.2581169879693	28.3236139954836	29.5124680364855	36.0566050797144	38.123722999868	35.4717022785785	35.9184234663361	31.0769096081409	36.1991164305733
ENSMUSG00000032554	35825.8202862761	26997.4534655809	33319.002795557	44401.3961993013	37294.6878518998	29610.9509223179	50157.5879989357	48143.14422951	53214.6020927449	31988.9800875792	45291.9357037118	42988.7045757663	34574.8852534888	45297.4924480413	-0.389708751805531	0.00796460642657158	0.137287464228175	Trf	9	103081200	103107643	-	3320	protein_coding	transferrin [Source:MGI Symbol;Acc:MGI:98821]	-	38699	30594	27901	42847	37437	28805	51875	50357	49828	33772	48400	40447	382.199005062277	273.015586120928	353.326361873411	470.233648741928	400.422352127546	314.798203159135	531.422829701713	511.985187085701	574.062961832649	339.238403372548	478.370061137062
ENSMUSG00000112246	63.8771441058698	31.7679389671475	56.1267743590258	81.8659486018813	60.768116007316	67.8466502646409	92.8217532124882	83.1752000311252	72.6216774164457	79.5651524149192	161.890596626904	96.7184739633282	60.3754287176469	97.7988089442017	-0.69906670141435	0.00801918673505736	0.137733791656812	Gm40761	10	111172985	111183046	+	1153	lncRNA	predicted gene, 40761 [Source:MGI Symbol;Acc:MGI:5623646]	-	69	36	47	79	61	66	96	87	68	84	173	91	1.9622199031224	0.925044139146187	1.71381092436845	2.49648609304789	1.87869329065766	2.07690712954815	2.83179693468111	2.54698024083472	2.25581645723977	2.42960846703701	4.92349509211835
ENSMUSG00000047094	2.77726713503782	3.52977099634972	3.58256006546973	10.3627783040356	8.96578760763678	8.22383639571404	21.2716517778619	15.2965885114713	10.679658443595	3.78881678166282	50.5323249586867	13.816924851904	6.24033341737395	19.2309942208636	-1.62944606436278	0.00801931287697373	1	Ofcc1	13	40155358	40514926	-	3575	protein_coding	orofacial cleft 1 candidate 1 [Source:MGI Symbol;Acc:MGI:2658851]	-	3	4	3	10	9	8	22	16	10	4	54	13	0.0275152271000319	0.0331492118861089	0.0352808926492513	0.101919039224014	0.0893967684381729	0.0811925889508462	0.209298837544059	0.151070465341753	0.106991212472129	0.0373138669662827	0.495649220139008
ENSMUSG00000020993	1361.78665188021	1166.58931429358	1145.22503426182	1605.19435929511	1172.52577935428	1544.02528329531	1851.60059793661	1696.00925120938	1674.57044395569	1447.3280105952	1673.18142640985	1528.36445669523	1332.55773706339	1645.17569780033	-0.304054488957103	0.00802208794567081	0.137733791656812	Trappc6b	12	59089878	59108258	-	2419	protein_coding	trafficking protein particle complex 6B [Source:MGI Symbol;Acc:MGI:1925482]	-	1471	1322	959	1549	1177	1502	1915	1774	1568	1528	1788	1438	19.9390607901785	16.1914166758509	16.6677544964875	23.3317286289724	17.2780987237579	22.5287197839971	26.9248375395791	24.7544554754203	24.7933005636117	21.0655983557271	24.2542784748102
ENSMUSG00000020894	1517.31361144233	1697.81984924422	1483.17986710447	1287.05706536122	1431.53742135267	1526.54963095442	1744.27544578467	1732.33864892412	1626.51198095951	1736.22529019699	1942.68715952284	1653.77962073559	1490.57624090989	1739.30302435396	-0.222480107239053	0.00804965932927594	0.137832607033033	Vamp2	11	68979316	68983210	+	3809	protein_coding	vesicle-associated membrane protein 2 [Source:MGI Symbol;Acc:MGI:1313277]	-	1639	1924	1242	1242	1437	1485	1804	1812	1523	1833	2076	1556	14.1089883215721	14.9652286765702	13.7089748399907	11.8806989238778	13.3968024146966	14.1454878467585	16.1081528553534	16.0576819282841	15.2937182811056	16.0486241391032	17.8843470975452
ENSMUSG00000021982	904.463330310649	747.429008477054	767.862040699013	978.246271900961	904.548349748244	889.202310286581	1046.17851016575	1086.05778431446	959.033328234827	900.791189840336	1079.89450004305	1185.06701614408	865.291885237084	1042.83705479042	-0.269096168387527	0.00808035811116001	0.137932678101654	Cdadc1	14	59796837	59835408	-	5640	protein_coding	cytidine and dCMP deaminase domain containing 1 [Source:MGI Symbol;Acc:MGI:1919141]	-	977	847	643	944	908	865	1082	1136	898	951	1154	1115	5.67993483063321	4.44931925183665	4.79320744415782	6.09851726193622	5.71691981928985	5.56467048441651	6.52481704099011	6.79884057896641	6.09005742836701	5.62325433327314	6.71403217804204
ENSMUSG00000024968	122.199753941664	205.609160537371	167.186136388588	173.058397677395	114.562841653137	232.323378178922	271.697006799054	274.382556424517	162.330808342643	197.965676841882	443.561519081805	254.018849200389	169.156611396179	267.326069448382	-0.660936076156636	0.0080809353918193	0.137932678101654	Rcor2	19	7244690	7252590	+	3157	protein_coding	REST corepressor 2 [Source:MGI Symbol;Acc:MGI:1859854]	MYB	132	233	140	167	115	226	281	287	152	209	474	239	1.37096776143016	2.18660633281846	1.86443741642385	1.92740622086528	1.29353628353725	2.59738486865839	3.02727531496852	3.06861882725436	1.84159090457253	2.20779130111912	4.92674941040226
ENSMUSG00000120936	8.33180140511345	11.4717557381366	20.3011737043285	54.9227250113887	27.8935614459811	17.4756523408923	130.530590455061	46.8458023163809	21.3593168871899	39.7825762074596	233.010165087278	5.31420186611694	23.3994449409734	79.4737754699144	-1.76695894558935	0.00809735182190163	0.137932678101654	ENSMUSG00000120936	5	15703800	15712067	-	2964	lncRNA	novel transcript	-	9	13	17	53	28	17	135	49	20	42	249	5	0.0995616770066944	0.129943456680745	0.241137680022295	0.651521928372809	0.335455710026282	0.208100522667328	1.54908679103333	0.558024813728105	0.25809283710382	0.472560486250619	2.75662608422828
ENSMUSG00000026879	139309.57100492	89969.450483209	108626.803745108	166186.839383989	132546.21919681	159156.933745803	176801.267538224	190440.614894254	148275.309865028	155003.336150412	197047.993825012	180342.754528544	132632.636259973	174651.879466912	-0.39704793382873	0.00810005842718545	0.137932678101654	Gsn	2	35146392	35197904	+	3157	protein_coding	gelsolin [Source:MGI Symbol;Acc:MGI:95851]	-	150482	101955	90963	160369	133052	154825	182855	199198	138839	163643	210570	169680	1562.92402026919	956.804500697453	1211.39157650116	1850.87549840685	1496.58773562781	1779.38102783201	1969.93746519063	2129.83530714779	1682.13578684175	1728.6583343973	2188.66165263376
ENSMUSG00000040564	937.790535931102	1032.45801643229	795.328334534281	1072.54755446768	1057.96293770114	975.552592441578	3280.66884010388	1944.57881452079	2429.62229591785	801.334749321687	747.691252629457	1109.60534964522	978.606661918013	1718.91688368981	-0.812597718803318	0.00817896023294769	0.13851237066442	Apoc1	7	19423406	19426585	-	744	protein_coding	apolipoprotein C-I [Source:MGI Symbol;Acc:MGI:88053]	-	1013	1170	666	1035	1062	949	3393	2034	2275	846	799	1044	44.6441339883907	46.5910168066606	37.6353231869332	50.6872560495638	50.6882080183377	46.2802531449617	155.106895585197	92.2812871518671	116.958723781906	37.9213457480422	35.2395664982966
ENSMUSG00000083674	23.1438927919818	26.4732824726229	8.35930681942938	18.6530009472641	15.9391779691321	28.7834273849992	33.841264192053	43.021655188513	26.6991461089874	35.9937594257968	56.1470277318741	27.6338497038081	20.2253480642382	37.2227837251721	-0.872832068864967	0.00818401297693851	0.13851237066442	Zfp133-ps	2	144301200	144342187	+	3122	transcribed_unitary_pseudogene	zinc finger protein 133, pseudogene [Source:MGI Symbol;Acc:MGI:2176612]	-	25	30	7	18	16	28	35	45	25	38	60	26	0.262563893024274	0.284693543784848	0.0942669590590983	0.210073355991842	0.181987869409335	0.325407517375869	0.381289922655938	0.48653629708229	0.306288905019107	0.405916786304412	0.63063063634314
ENSMUSG00000049339	1633.03307540224	1471.91450547783	1349.4309579936	1442.49873992176	1628.78474872068	1512.15791726192	1874.80603623973	1789.70085584214	1910.59089555914	1665.18497554081	1788.28283326019	1521.98741445589	1506.30332412967	1758.42550181632	-0.222931061178625	0.00818779114658209	0.13851237066442	Retreg2	1	75119422	75124557	+	2999	protein_coding	reticulophagy regulator family member 2 [Source:MGI Symbol;Acc:MGI:2388278]	-	1764	1668	1130	1392	1635	1471	1939	1872	1789	1758	1911	1432	19.2863484117963	16.4781648381174	15.8415011759268	16.9119675489958	19.3596119490636	17.796666246642	21.9898124290309	21.0700229712644	22.8169730852845	19.5491877961855	20.9093693785347
ENSMUSG00000035085	364.747750401633	250.61374074083	286.604805237579	388.604186401335	320.775956628783	507.821897435342	462.174979537181	449.33728752447	489.128356716649	447.080380236213	523.10314170196	465.524083471844	353.194722807584	472.724704864719	-0.42075637751411	0.00820847977240997	0.138559496616286	1700020L24Rik	11	83328503	83332059	+	1050	protein_coding	RIKEN cDNA 1700020L24 gene [Source:MGI Symbol;Acc:MGI:1913580]	-	394	284	240	375	322	494	478	470	458	472	559	438	12.3036740100794	8.01342733999199	9.60984314065322	13.0128773294947	10.8898507923389	17.0702585376955	15.4831306726046	15.1092946065763	16.6840058801181	14.991290266406	17.4694496076948
ENSMUSG00000030630	2924.46229319482	1833.71603260368	2573.47231369576	3623.86357292125	2620.00237867608	3097.3023825358	3497.25293093302	4143.46341304479	4063.61003778788	3255.54081964378	3393.15204259626	3461.67109558857	2778.80316227123	3635.78172326572	-0.387881758808793	0.00827534413867253	0.138931558247092	Fah	7	84234367	84255930	-	2218	protein_coding	fumarylacetoacetate hydrolase [Source:MGI Symbol;Acc:MGI:95482]	-	3159	2078	2155	3497	2630	3013	3617	4334	3805	3437	3626	3257	46.6999028572555	27.7570471956853	40.8488739226651	57.4467491701893	42.1065407297771	49.2878686919137	55.4634842209153	65.9573191932031	65.6171365805596	51.6778341668317	53.6442245115799
ENSMUSG00000000326	6864.4786021018	4828.72672300642	7089.8863695646	6956.5330754991	6498.20361829053	7395.28487884585	7558.20463397937	7811.776545452	9348.97300152302	8312.66401896823	7994.40096522334	7519.59564055546	6605.51887788472	8090.93580095024	-0.292718584579589	0.00827539871463395	0.138931558247092	Comt	16	18225636	18245602	-	2532	protein_coding	catechol-O-methyltransferase [Source:MGI Symbol;Acc:MGI:88470]	-	7415	5472	5937	6713	6523	7194	7817	8171	8754	8776	8543	7075	96.0230169805929	64.028252626463	98.5820179409575	96.6015985134729	91.4827126499417	103.088253286028	105.001763280336	108.9299086937	132.241265382391	115.589724029774	110.71422351925
ENSMUSG00000028407	47.2135412956429	38.827480959847	58.5151477360057	69.4306146370385	47.8175339073962	71.9585684624979	136.331950030842	88.9114207229269	90.7770967705571	82.4067650011664	84.2205415978111	48.8906571682758	55.6271478330713	88.5897385485966	-0.675792491624272	0.00833308069327193	0.139748381420538	Smim27	4	40269579	40270940	+	1150	protein_coding	small integral membrane protein 27 [Source:MGI Symbol;Acc:MGI:1913684]	-	51	44	49	67	48	70	141	93	85	87	90	46	1.4541199365256	1.13355891949672	1.79140010719786	2.12279633653321	1.48217250859811	2.20852667227709	4.17005183932892	2.72973657415758	2.82712649477984	2.52294466808436	2.56803762608254
ENSMUSG00000058492	436.030940200937	292.970992697027	390.499047136201	456.99852320797	408.441435459009	511.933815633199	627.513727446925	576.490179526075	610.876462973631	396.878557879181	586.736439798084	511.226219520449	416.145792389057	551.620264524058	-0.406995657244573	0.00834879582998403	0.139860401138878	Scp2-ps2	9	123135665	123147063	-	1427	transcribed_unprocessed_pseudogene	sterol carrier protein 2, pseudogene 2 [Source:MGI Symbol;Acc:MGI:107679]	-	471	332	327	441	410	498	649	603	572	419	627	481	10.8224310375406	6.89292214219038	9.6342549706356	11.2601968650736	10.2027028994979	12.6621606288226	15.4682401222778	14.263594030258	15.3319082259465	9.79211180369113	14.4178426402462
ENSMUSG00000030094	741.530325055097	695.364886280895	646.054998473042	663.217811458278	689.369447164962	784.348396241227	802.521407982971	782.994124430937	731.556603386254	842.064529724562	873.086281230642	920.419763211453	703.314310778917	825.440451661137	-0.230530595486619	0.00840343535902906	0.140320146626117	Xpc	6	91466287	91492870	-	5494	protein_coding	xeroderma pigmentosum, complementation group C [Source:MGI Symbol;Acc:MGI:103557]	-	801	788	541	640	692	763	830	819	685	889	933	866	4.7804827352854	4.24939228268827	4.14002502430535	4.2444623542873	4.47273117014917	5.03893007589978	5.13818360279487	5.03188697028296	4.76898626579332	5.39634142453429	5.5724951884991
ENSMUSG00000035513	906.314841734007	457.987786776376	833.542308565958	863.219432726166	811.901877802664	926.209574067294	1026.84064491315	1216.07878666197	964.373157456625	966.148279324019	1116.39006806876	1105.35398815232	799.862636945411	1065.86415409614	-0.414713932205243	0.00844162941600936	0.140654447503131	Ntng2	2	29084553	29143017	-	3990	protein_coding	netrin G2 [Source:MGI Symbol;Acc:MGI:2159341]	-	979	519	698	833	815	901	1062	1272	903	1020	1193	1040	8.0452156397727	3.8537516581318	7.35490187738591	7.60682583541687	7.25337397495604	8.19321486387365	9.05256814264813	10.7609309851988	8.65643375646212	8.52537693562342	9.81124817906974
ENSMUSG00000025484	557.304938430922	549.761832681469	554.102623459319	525.392860014605	501.087907404589	606.507934183911	673.924604053169	625.24805540639	662.138823502887	626.101973169781	656.920224462927	571.808120794182	549.026349362469	636.023633564889	-0.212548790374257	0.00854029051459923	0.141840297076697	Bet1l	7	140433307	140437490	-	3953	protein_coding	Bet1 golgi vesicular membrane trafficking protein like [Source:MGI Symbol;Acc:MGI:1913128]	-	602	623	464	507	503	590	697	654	620	661	702	538	4.9934139474942	4.66928620307607	4.93498142563269	4.67318002958528	4.51852331350967	5.41536390856857	5.99689086449128	5.5845291786663	5.99914046153488	5.57649039851685	5.82729509384275
ENSMUSG00000105636	1.85151142335854	1.76488549817486	0	0	1.99239724614151	5.13989774732128	6.76825283841059	8.60433103770261	3.20389753307849	7.57763356332564	4.67891897765618	14.8797652251274	1.79144865249936	7.61879986255015	-2.06696073937194	0.00857133110811995	1	Gm43625	5	146140061	146141599	-	1539	lncRNA	predicted gene 43625 [Source:MGI Symbol;Acc:MGI:5663762]	-	2	2	0	0	2	5	7	9	3	8	5	14	0.0426107588835235	0.0385017649424429	0	0	0.0461473463528219	0.117878291706983	0.154696184344618	0.197396532747357	0.0745601529411035	0.173355522292996	0.106607583206805
ENSMUSG00000033739	171.264806660665	117.364885628628	164.797763011608	150.260285408516	101.612259553217	153.168952870174	192.411759263387	187.383209265523	215.729100560618	206.490514600624	174.991569764341	163.677417476402	143.078158855468	190.113928488482	-0.411879209885562	0.00859202762847034	0.142409956205936	Fkbpl	17	34863738	34865298	+	1336	protein_coding	FK506 binding protein-like [Source:MGI Symbol;Acc:MGI:1932127]	-	185	133	138	145	102	149	199	196	202	218	187	154	4.54039005071946	2.9494052248405	4.342771554019	3.95451212258595	2.71112205680138	4.04652529185928	5.06601883164747	4.95205253859312	5.78321138373862	5.44172197233765	4.59295152602337
ENSMUSG00000030623	4.62877855839636	7.05954199269945	2.38837337697982	5.1813891520178	11.954383476849	0	11.602719151561	6.6922574737687	18.1554193541114	20.8384922991455	18.7156759106247	14.8797652251274	5.20207775949041	15.1473882357231	-1.52770440685844	0.00860449231464203	1	Prss23os	7	89159215	89161081	+	1592	lncRNA	protease, serine 23, opposite strand [Source:MGI Symbol;Acc:MGI:1916654]	-	5	8	2	5	12	0	12	7	17	22	20	14	0.102980461560526	0.148879940317637	0.0528179192718063	0.114434850887516	0.267666203657008	0	0.256364782167661	0.148419377951373	0.408441641833771	0.460856726899832	0.412233845616265
ENSMUSG00000034361	1375.6729875554	601.825954877628	915.941190071762	1391.72112623198	1338.89094940709	1376.46461673264	1848.69991814872	2180.71989966663	1500.49201132509	1391.44296306567	1659.14466947688	1503.91912811109	1166.75280414608	1680.73643163235	-0.526693195920737	0.00862260049914063	0.142595334536536	Cpne2	8	95259618	95297159	+	3200	protein_coding	copine II [Source:MGI Symbol;Acc:MGI:2387578]	-	1486	682	767	1343	1344	1339	1912	2281	1405	1469	1773	1415	15.2263821049546	6.3142774187591	10.077196840267	15.2917574718224	14.9143608677685	15.1821419477941	20.3216090077935	24.0608484358248	16.7938589483108	15.3093986171994	18.1809038809062
ENSMUSG00000119959	60.1741212591527	61.7709924361201	76.4279480633543	75.6482816194599	54.7909242688915	84.2943230560689	118.9278713035	108.988193144233	90.7770967705571	75.7763356332564	99.1930823263109	82.9015491114242	68.8510984505079	96.094021381547	-0.485472977461648	0.00867518138362249	0.143006531029918	ENSMUSG00000119959	16	24210357	24212419	-	2063	lncRNA	novel transcript, antisense to Lpp	-	65	70	64	73	55	82	123	114	85	80	106	78	1.03309919169008	1.00528238905705	1.30429281598783	1.28930301800713	0.94671404072579	1.44217204622762	2.02780441852248	1.8652680607741	1.57595514735667	1.29323387692158	1.68602244099457
ENSMUSG00000068762	35.1787170438123	59.1236641888579	31.0488539007377	95.3375603971275	92.6464719455801	133.637341430353	192.411759263387	134.801186257341	104.660652747231	95.6676237369862	171.248434582216	124.352323667136	74.4954348177448	137.190330042383	-0.881017333296034	0.00869547864486831	0.143116660952085	Gstm6	3	107846163	107851065	-	1989	protein_coding	glutathione S-transferase, mu 6 [Source:MGI Symbol;Acc:MGI:1309467]	-	38	67	26	92	93	130	199	141	98	101	183	117	0.626435998246914	0.997997106211694	0.549582532553697	1.68532790350821	1.66036481685277	2.37143386845813	3.40281606791404	2.39287471144873	1.88458377524436	1.69345205063481	3.01906886994621
ENSMUSG00000042626	2056.10343563966	1748.1190859422	1910.69870158386	2026.95943626936	2005.34782824143	1914.09792110244	2313.77557747379	2184.5440467945	2228.84471717827	2287.49813192893	2209.38554124925	1985.38581718129	1943.55440146316	2201.572305301	-0.180078887875197	0.00870035389598244	0.143116660952085	Shc1	3	89325750	89337334	+	5645	protein_coding	src homology 2 domain-containing transforming protein C1 [Source:MGI Symbol;Acc:MGI:98296]	-	2221	1981	1600	1956	2013	1862	2393	2285	2087	2415	2361	1868	12.9006771075457	10.3970418409351	11.9165459671519	12.6251419943625	12.6629585502628	11.9679062719143	14.4177979122191	13.6633718729918	14.1410825692625	14.2672247425497	13.7242542278477
ENSMUSG00000106446	0.925755711679272	0	0	1.03627783040356	5.97719173842452	4.11191819785702	15.4702922020814	3.82414712786783	9.61169259923546	10.4192461495728	6.55048656871864	6.37704223934032	2.00852391306073	8.70881781446939	-2.11553196934818	0.0087267171280701	1	Gm42970	3	127091971	127093322	-	1352	TEC	predicted gene 42970 [Source:MGI Symbol;Acc:MGI:5663107]	-	1	0	0	1	6	4	16	4	9	11	7	6	0.0242522033734256	0	0	0.0269497459486576	0.157590457182677	0.107345970968667	0.402497764507806	0.0998662931946687	0.254618510450499	0.271332806665878	0.169894007971437
ENSMUSG00000026626	13415.1260179443	7071.01374843758	10806.1953441452	14924.4733134721	11526.0180689286	13660.8202328305	16287.3170090038	18566.2343057983	14463.4614301606	14124.708962039	18307.6741757731	14411.0526205359	11900.6077876264	16026.7414172185	-0.429472798513397	0.00874524362090794	0.143287391722584	Ppp2r5a	1	191084172	191135469	-	9607	protein_coding	protein phosphatase 2, regulatory subunit B', alpha [Source:MGI Symbol;Acc:MGI:2388479]	-	14491	8013	9049	14402	11570	13289	16845	19420	13543	14912	19564	13559	49.4582173542195	24.7113581129677	39.6010912653792	54.6218471987373	42.7662258274179	50.1888170680216	59.6352997028024	68.2334083353885	53.9201687943521	51.7647854043748	66.8230935014754
ENSMUSG00000054855	12.9605799635098	5.29465649452458	25.0779204582881	42.487391046546	31.8783559382641	27.7554478355349	93.7886464751182	64.0544643917861	69.4177798833672	28.4161258624712	55.2112439363429	22.3196478376911	24.2423919561113	55.5346513977961	-1.20144357260159	0.00875701741517955	0.143287391722584	Rnd1	15	98561302	98575342	-	2967	protein_coding	Rho family GTPase 1 [Source:MGI Symbol;Acc:MGI:2444878]	-	14	6	21	41	32	27	97	67	65	30	59	21	0.154717123509336	0.059913262129848	0.297574768637518	0.50349791622042	0.382990312299254	0.330178406154383	1.11192211890402	0.762242020790855	0.83795358942403	0.33720190698802	0.65251602040857
ENSMUSG00000037446	2.77726713503782	0	5.97093344244956	6.21766698242136	6.97339036149528	3.08393864839277	14.5033989394513	15.2965885114713	8.54372675487596	9.47204195415705	17.7798921150935	6.37704223934032	4.1705327616328	11.9954484190649	-1.55200090906774	0.0088109985502931	1	Tulp1	17	28570489	28584196	-	6664	protein_coding	tubby like protein 1 [Source:MGI Symbol;Acc:MGI:109571]	Tub	3	0	5	6	7	3	15	16	8	10	19	6	0.0147609449103563	0	0.031544915771577	0.0328055730995664	0.0373008224984206	0.0163338557266249	0.0765555096809191	0.0810439546213638	0.0459175971894191	0.0500439204698607	0.0935567929336793
ENSMUSG00000022216	1481.20913868684	1482.50381846688	1302.85767714249	1567.88835740059	1580.96721481329	1806.1600684087	1838.06409225979	1824.11817999295	1699.13365837596	1856.52022301478	1903.38424011053	1683.53915118585	1536.9310458198	1800.79325748998	-0.228517895924189	0.00884412831478929	0.143662093079037	Psme1	14	55815580	55818986	+	2209	protein_coding	proteasome (prosome, macropain) activator subunit 1 (PA28 alpha) [Source:MGI Symbol;Acc:MGI:1096367]	-	1600	1680	1091	1513	1587	1757	1901	1908	1591	1960	2034	1584	23.7493736248955	22.5321600937042	20.7645914625307	24.9559771474292	25.5115336579239	28.8588150272876	29.2689122466407	29.1553517186123	27.5485420135485	29.5901160969605	30.2142588962812
ENSMUSG00000117901	4.62877855839636	7.94198474178688	13.136053573389	3.10883349121068	4.98099311535377	24.6715091871421	28.0399046162725	11.4724413836035	17.0874535097519	35.9937594257968	34.6240004346557	21.2568074644677	9.74469211121314	24.745727805758	-1.35488307940399	0.0089112751979363	0.144286222582485	ENSMUSG00000117901	19	7064834	7065786	-	953	lncRNA	novel transcript, antisense to Macrod1	-	5	9	11	3	5	24	29	12	16	38	37	20	0.172030319836681	0.27979430546578	0.485281952931727	0.11469902368075	0.186308410380359	0.913736113848715	1.03496408386818	0.425034297164298	0.642171810430827	1.32977146573177	1.27398858563381
ENSMUSG00000078921	141.640623886929	97.0687023996174	126.583788979931	100.518949549145	195.254930121868	125.413505034639	352.916040859981	230.404864454036	129.223867167499	197.965676841882	193.707245674966	144.546290758381	131.080083328688	208.127330959458	-0.66796056577442	0.00903722464012353	0.145564204166985	Tgtp2	11	48948021	48955033	-	2938	protein_coding	T cell specific GTPase 2 [Source:MGI Symbol;Acc:MGI:3710083]	-	153	110	106	97	196	122	365	241	121	209	207	136	1.70752681450419	1.1092518357907	1.51687023705852	1.20296034128344	2.36897041239799	1.50664345094076	4.22533604555208	2.76885926176015	1.5752799092965	2.37236117686626	2.31193312491093
ENSMUSG00000034880	694.316783759454	519.758779212497	554.102623459319	688.088479387964	604.692564203947	659.962870756052	851.832964377105	854.696883078459	813.789973401936	663.990140986409	743.948117447332	655.77251027883	620.153683463205	764.005098261678	-0.30095242425123	0.00915197783056293	0.145990334441297	Mrpl34	8	71917603	71918391	+	607	protein_coding	mitochondrial ribosomal protein L34 [Source:MGI Symbol;Acc:MGI:2137227]	-	750	589	464	664	607	642	881	894	762	701	795	617	40.51356543765	28.7485447851245	32.1383551491368	39.8575643014769	35.5103830184964	38.3750351174907	49.3636652881407	49.7146582326514	48.0164928263509	38.5137352378611	42.9769064551705
ENSMUSG00000001663	792.446889197457	985.68855073066	691.434092635659	866.328266217376	832.82204888715	812.103844076762	1336.24648895478	916.839273906311	808.450144180138	1017.29730587647	1292.31742162864	1052.21196949115	830.137281957511	1070.56043400625	-0.366679005552063	0.00917017516102765	0.146034096005707	Gstt1	10	75619647	75634418	-	1528	protein_coding	glutathione S-transferase, theta 1 [Source:MGI Symbol;Acc:MGI:107379]	-	856	1117	579	836	836	790	1382	959	757	1074	1381	990	18.3686950199646	21.6580365010637	15.9312394670597	19.9349105058122	19.4284556305386	18.7588489319721	30.7613131161369	21.185117806745	18.9494531107991	23.4405199460718	29.6569877535121
ENSMUSG00000036959	558.230694142601	431.514504303754	429.907207856368	442.49063358232	588.753386234815	419.415656181416	569.50013168912	603.25920942115	625.827984794664	517.173490696975	695.287360079708	576.059482287076	478.385347050212	597.851276494782	-0.3210194549532	0.00920533232627197	0.14642459136997	Bcorl1	X	47430235	47496926	+	8516	protein_coding	BCL6 co-repressor-like 1 [Source:MGI Symbol;Acc:MGI:2443910]	-	603	489	360	427	591	408	589	631	586	546	743	542	2.32171844920214	1.7012277914807	1.77730189602264	1.82693707552182	2.46437721511642	1.73830892208349	2.35233853786235	2.50109009863463	2.63200141578777	2.13817527668023	2.86292436408098
ENSMUSG00000026189	308.276651989198	282.381679707978	327.207152646236	393.785575553353	307.825374528863	427.63949257713	554.029839487039	521.996082953958	513.691571136917	342.887918740485	386.4787075544	404.94218219811	341.185987833793	454.004383678485	-0.412622778589875	0.00922306941290247	0.14642459136997	Pecr	1	72298326	72323473	-	1516	protein_coding	peroxisomal trans-2-enoyl-CoA reductase [Source:MGI Symbol;Acc:MGI:2148199]	-	333	320	274	380	309	416	573	546	481	362	413	381	7.20232849206475	6.25374313946382	7.59881231191164	9.13304846872184	7.23793426960119	9.95626799865587	12.8551042287739	12.1570743248613	12.135845262979	7.96334777942196	8.9393833956897
ENSMUSG00000075277	21.2923813686233	23.8259542253606	17.9128003273487	45.5962245377566	17.9315752152736	24.6715091871421	48.3446631315042	42.0656184065461	23.4952485759089	48.307413966201	37.4313518212494	86.0900702310944	25.2050741435841	47.6223943554173	-0.916607732884447	0.00925082486188229	0.146458043265662	Haglr	2	74578766	74593240	-	3021	lncRNA	Hoxd antisense growth associated long non-coding RNA [Source:MGI Symbol;Acc:MGI:3026978]	-	23	27	15	44	18	24	50	44	22	51	40	81	0.249634728930831	0.264790440028688	0.208754040418857	0.530680730550725	0.211581229504448	0.288245785004245	0.562910643841603	0.491629100427379	0.278545477025255	0.562996590088339	0.434476188163584
ENSMUSG00000038253	249.954042153403	235.612214006344	164.797763011608	173.058397677395	264.98883373682	223.071562233743	309.405844041627	227.536754108136	266.991461089874	274.689216670555	338.753733982307	328.417675326027	218.580468803219	290.965780869754	-0.410382559404105	0.00925085052759211	0.146458043265662	Hoxa5	6	52178734	52181567	-	1877	protein_coding	homeobox A5 [Source:MGI Symbol;Acc:MGI:96177]	Homeobox	270	267	138	167	266	217	320	238	250	290	362	309	4.71658194961922	4.21440483159138	3.09107234745305	3.24178020206271	5.03237180762922	4.19467106375484	5.79836950042146	4.28004480008094	5.09448034879943	5.152524184509	6.32850330751295
ENSMUSG00000040462	4400.11689761158	3410.64122522292	3402.23787550776	4162.7280447311	4045.56260829033	4573.48101556647	4846.06903230199	4853.79874204624	5100.60487266095	4335.35360241768	4683.59789663383	4655.24083471844	3999.12794448836	4745.77749679652	-0.246866766572262	0.00927396457719994	0.146458043265662	Os9	10	126931519	126957000	-	2629	protein_coding	amplified in osteosarcoma [Source:MGI Symbol;Acc:MGI:1924301]	-	4753	3865	2849	4017	4061	4449	5012	5077	4776	4577	5005	4380	59.2795804492285	43.5560185987851	45.5613117521033	55.6727421267494	54.8526684815953	61.4008337754981	64.8396493867475	65.1856811128469	69.4860920498906	58.0599476558783	62.4698134750204
ENSMUSG00000030301	901.686063175611	878.912978091081	913.552816694782	796.897651580338	868.685199317697	895.370187583367	1063.58258889309	979.93770151613	932.33418212584	926.36570311656	1019.06855333351	1113.85671113811	875.850816073813	1005.85757335387	-0.199639223536286	0.00927903093064046	0.146458043265662	Ccdc91	6	147377326	147534110	+	2870	protein_coding	coiled-coil domain containing 91 [Source:MGI Symbol;Acc:MGI:1914265]	-	974	996	765	769	872	871	1100	1025	873	978	1089	1048	11.1276883302748	10.2817420525146	11.2066006137191	9.76283186964038	10.7892174188602	11.0113028436354	13.0355983313591	12.0552882499279	11.6347351688224	11.3643152236553	12.4509559466685
ENSMUSG00000029535	630.439639653584	555.938931925081	499.170035788783	662.181533627875	455.262770743334	754.536989306764	832.495099124503	743.796616370292	768.935407938837	638.415627710185	724.296657741176	829.015491114242	592.921650174237	756.159149999873	-0.350429289564674	0.00934342839811302	0.147277930931152	Triap1	5	115479284	115481628	+	1088	protein_coding	TP53 regulated inhibitor of apoptosis 1 [Source:MGI Symbol;Acc:MGI:1916326]	-	681	630	418	639	457	734	861	778	720	674	774	780	20.5232487797366	17.155402681638	16.152574120836	21.3994854025109	14.915666396556	24.4776439609913	26.9150033160691	24.1371690474659	25.3120754506673	20.6593814679702	23.3436508473863
ENSMUSG00000085180	87.0210368978516	96.1862596505299	121.807042225971	111.918005683584	189.277738383443	95.6020981001758	211.749624515989	130.977039129473	228.544690692932	199.860085232714	205.872435016872	108.409718068785	116.968696823593	180.902265442794	-0.630265326559021	0.00935487934820382	0.147308420580719	AI838599	4	3242055	3258092	+	4243	lncRNA	expressed sequence AI838599 [Source:MGI Symbol;Acc:MGI:3510989]	-	94	109	102	108	190	93	219	137	214	211	220	102	0.726411506557131	0.761101764183331	1.01069820917193	0.927432030270842	1.59014206304839	0.795265908892075	1.75546132007995	1.08989124974601	1.92914511199157	1.6584246228695	1.70139974179402
ENSMUSG00000017493	15837.828715409	9895.71298826645	13768.9725182887	18455.071881657	18920.8004479828	20401.2821386676	22710.3889526554	24399.0147125787	20813.5863407222	20801.5513355243	23493.7879706072	17917.3630117999	16213.2781150453	21689.2820539813	-0.419825456032917	0.00939958437038412	0.14755441788975	Igfbp4	11	98932070	98945218	+	4416	protein_coding	insulin-like growth factor binding protein 4 [Source:MGI Symbol;Acc:MGI:96439]	-	17108	11214	11530	17809	18993	19846	23488	25521	19489	21961	25106	16858	127.027593311274	75.2351427748358	109.772763796722	146.940609286847	152.728420441645	163.059599471768	180.899411942519	195.076184781238	168.804743433714	165.847664798254	186.55426111235
ENSMUSG00000036790	1.85151142335854	3.52977099634972	0	3.10883349121068	5.97719173842452	1.02797954946426	24.1723315657521	1.91207356393391	11.7476242879545	7.57763356332564	13.1009731374373	4.25136149289355	2.58254786646795	10.4603329352162	-1.9992560980074	0.00947704399731302	1	Slitrk2	X	65692924	65704999	+	8080	protein_coding	SLIT and NTRK-like family, member 2 [Source:MGI Symbol;Acc:MGI:2679449]	-	2	4	0	3	6	1	25	2	11	8	14	4	0.00811608390120578	0.0146668852095098	0	0.0135282388078905	0.0263690963008637	0.00449046264695661	0.10523224350529	0.00835515027222723	0.0520721464166643	0.0330190778228863	0.0568556185092532
ENSMUSG00000033377	4499.17275876126	2084.32977334451	3649.43452002517	4540.9694528284	4522.74174874122	4912.71426688968	5085.85856143425	6413.09473343434	4809.05019715081	5598.92399910223	5711.08850412713	5680.881794879	4034.89375343171	5549.81629835463	-0.459975379076971	0.00950233067683287	0.14842237794823	Palmd	3	116711907	116762636	-	7273	protein_coding	palmdelphin [Source:MGI Symbol;Acc:MGI:2148896]	-	4860	2362	3056	4382	4540	4779	5260	6708	4503	5911	6103	5345	21.9104135500942	9.62178322384458	17.665832914964	21.9528117258308	22.1665253545956	23.8410781792423	24.5975775320754	31.1325788567916	23.6816803437253	27.1040185207193	27.5350897181035
ENSMUSG00000106680	3.70302284671709	0	0	1.03627783040356	4.98099311535377	5.13989774732128	15.4702922020814	11.4724413836035	6.40779506615697	7.57763356332564	4.67891897765618	10.6284037322339	2.47669858996595	9.37258082084292	-1.91095067432464	0.00952652151702972	1	Gm43852	5	32870416	32871332	-	917	TEC	predicted gene 43852 [Source:MGI Symbol;Acc:MGI:5663989]	-	4	0	0	1	5	5	16	12	6	8	5	10	0.143027171039788	0	0	0.0397339765786096	0.193622590068138	0.197834995569299	0.593431818554585	0.44172048549354	0.250268430482788	0.290942365113327	0.178919379013384
ENSMUSG00000019689	107.387662554796	142.073282603076	175.545443208017	165.80445286457	127.513423753056	193.26015529928	227.21991671807	220.844496634367	189.029954451631	176.179980347321	180.606272537528	230.636360989475	151.930736713799	204.086163613065	-0.428232224707751	0.00958764041271478	0.148725459484325	Fmc1	6	38510437	38516384	+	689	protein_coding	formation of mitochondrial complex V assembly factor 1 [Source:MGI Symbol;Acc:MGI:1913367]	-	116	161	147	160	128	188	235	231	177	186	193	217	5.52035059428313	6.92302526536543	8.9700005367672	8.46120325633324	6.59699423275406	9.9001340772612	11.6002893450127	11.3169237156072	9.82603257939788	9.00285044964792	9.19167797305306
ENSMUSG00000018169	2554.16000852311	990.983207225185	1681.4148573938	2571.00529723123	2396.85388710823	2798.1603336417	3361.88787416481	3903.49818077108	2164.7667665167	2508.19670946079	4782.79097896014	3397.90067319517	2165.42959852054	3353.17353051145	-0.630939732680255	0.00958899209027431	0.148725459484325	Mfng	15	78640082	78657675	-	2839	protein_coding	MFNG O-fucosylpeptide 3-beta-N-acetylglucosaminyltransferase [Source:MGI Symbol;Acc:MGI:1095404]	-	2759	1123	1408	2481	2406	2722	3477	4083	2027	2648	5111	3197	31.8650204131892	11.7193527377121	20.8512271033546	31.8414428434426	30.0943929350132	34.7876568320283	41.6542653919911	48.5455714647676	27.3094221894891	31.1056228445766	59.0741119836564
ENSMUSG00000028359	22.2181370803025	24.7083969744481	23.8837337697982	43.5236688769495	67.7415063688112	93.5461390012473	133.431270242952	195.987540303226	61.9420189728507	21.7856964945612	184.349407719653	68.0217838862968	45.9369303452595	110.919619603257	-1.27277846129768	0.0096209672247513	0.148922951671925	Orm3	4	63274399	63277748	+	773	protein_coding	orosomucoid 3 [Source:MGI Symbol;Acc:MGI:97445]	-	24	28	20	42	68	91	138	205	58	23	197	64	1.0180278073233	1.07316821144874	1.08778948875441	1.97970811636296	3.12381118403332	4.27134201171314	6.07183238282734	8.95179230977826	2.86993892704993	0.992280954496311	8.36264085365818
ENSMUSG00000020181	327.717521934462	183.548091810186	403.63510070959	384.459075079721	308.821573151934	355.680924114632	415.764102930937	600.391099075249	430.390235276877	436.66113408664	383.671356167806	461.27272197895	327.310381133421	454.69177491941	-0.475830225984945	0.00969194063226618	0.149648119544086	Nav3	10	109517120	110292065	-	16536	protein_coding	neuron navigator 3 [Source:MGI Symbol;Acc:MGI:2183703]	-	354	208	338	371	310	346	430	628	403	461	410	434	0.701941131600657	0.372668026707042	0.859370799724295	0.81747562710928	0.665712308643801	0.759185813548842	0.884419223112672	1.28193147427873	0.932177761181108	0.929729851542942	0.813598438892866
ENSMUSG00000045257	25.9211599270196	41.4748092071092	47.7674675395965	50.7776136897744	47.8175339073962	57.5668547699983	77.3514610104068	57.3622069180174	59.8060872841317	61.5682727020208	90.7710281665298	61.6447416469564	45.2209065068157	68.0839662880105	-0.595991260815012	0.00969681916808054	0.149648119544086	Morn2	17	80597632	80604905	+	656	protein_coding	MORN repeat containing 2 [Source:MGI Symbol;Acc:MGI:2674071]	-	28	47	40	49	48	56	80	60	56	65	97	58	1.39952958979329	2.122673905169	2.56360144758279	2.72159568537602	2.59832070867047	3.09732399160812	4.14769037815971	3.08732991766445	3.26518913672564	3.30442448029342	4.85204263532364
ENSMUSG00000053644	1266.43381357724	1157.76488680271	1209.71111544028	1416.59179416167	1427.55262686039	1533.74548780067	2006.30351995743	1889.12868116671	1560.29809860922	1279.67286800662	1903.38424011053	1475.22243803406	1335.29995410716	1685.66830764743	-0.336329497734155	0.00974154007735692	0.149848245585994	Aldh7a1	18	56642759	56706023	-	5181	protein_coding	aldehyde dehydrogenase family 7, member A1 [Source:MGI Symbol;Acc:MGI:108186]	-	1368	1312	1013	1367	1433	1492	2075	1976	1461	1351	2034	1388	8.65765744421387	7.502560482079	8.22034811213713	9.61360533996791	9.8217291768974	10.4485898042105	13.6214923343732	12.8738658230459	10.7860090153033	8.69617098631665	12.8823196104778
ENSMUSG00000038366	6992.23289031354	5412.9038229023	5027.52595854253	5085.01531379027	6119.64814152364	5890.32281843018	6964.5321707245	7849.06197994871	6796.53463350383	6279.96381560613	7269.16852368663	6328.15158217205	5754.60815758374	6914.56878427364	-0.264844479424443	0.00978295795369288	0.149931095213081	Lasp1	11	97689826	97729590	+	6495	protein_coding	LIM and SH3 protein 1 [Source:MGI Symbol;Acc:MGI:109656]	-	7553	6134	4210	4907	6143	5730	7203	8210	6364	6630	7768	5954	38.130124417469	27.9803974176704	27.2519320010633	27.52759497403	33.5858788117973	32.00942814686	37.7185024033644	42.6677392285361	37.4778933382163	34.0424404658035	39.2452206335139
ENSMUSG00000024962	2075.54430558493	1824.89160511281	1798.44515286581	2198.98155611635	1972.47327368009	2389.02447295493	3301.94049188174	2980.92268617297	1991.75629973046	1958.81827611968	3467.07896244323	2560.38245909514	2043.22672771915	2710.14986257387	-0.407599933962685	0.00979422284455051	0.149955267468642	Vegfb	19	6959841	6965019	-	1605	protein_coding	vascular endothelial growth factor B [Source:MGI Symbol;Acc:MGI:106199]	-	2242	2068	1506	2122	1980	2324	3415	3118	1865	2068	3705	2409	45.8024241933169	38.1737442983165	39.4497532666535	48.1727800254987	43.807201480762	52.5367902476881	72.3662141181348	65.5747592131902	44.4455162153496	42.9696495122157	75.7477764993506
ENSMUSG00000028861	745.233347901814	615.945038863027	648.443371850022	730.57587043451	681.399858180396	729.865480119621	856.667430690255	890.070244011236	741.16829598549	762.499377309643	827.232875249612	766.307909094062	691.910494558232	807.32435539005	-0.222920082566585	0.00990329581540896	0.150582628611705	Mrps15	4	125940718	125949325	+	1693	protein_coding	mitochondrial ribosomal protein S15 [Source:MGI Symbol;Acc:MGI:1913657]	-	805	698	543	705	684	710	886	931	694	805	884	721	15.5907430971657	12.2148384347315	13.4845738990043	15.172722887432	14.3467820346436	15.2161170189372	17.7990550120531	18.5621532249923	15.6792999234481	15.8571537057872	17.1337340071898
ENSMUSG00000025231	1072.95086983628	897.444275821917	963.708657611358	1092.23683324535	997.194821693824	1087.60236333318	1086.78802719622	1200.7821981505	1244.18020867881	1113.91213380887	1227.74833973698	1163.81020867961	1018.52297025699	1172.87018604183	-0.203575714185589	0.00992380089615462	0.150746333730694	Sufu	19	46385335	46477243	+	7691	protein_coding	SUFU negative regulator of hedgehog signaling [Source:MGI Symbol;Acc:MGI:1345643]	-	1159	1017	807	1054	1001	1058	1124	1256	1165	1176	1312	1095	4.94115545646209	3.91766596818416	4.41148776992183	4.99331732867047	4.62175184000974	4.99120382294619	4.97054124007573	5.51242201499757	5.79385029313299	5.09930306525958	5.59767573965723
ENSMUSG00000071867	12.0348242518305	6.17709924361201	8.35930681942938	9.32650047363204	15.9391779691321	10.2797954946426	21.2716517778619	18.1646988573722	22.4272827315494	16.102471322067	16.8441083195622	22.3196478376911	10.3527840420464	19.5216434743506	-0.911889696639105	0.00996309311053509	0.150898941544004	Mrpl27-ps	18	15144303	15144749	+	447	processed_pseudogene	mitochondrial ribosomal protein L27, pseudogene [Source:MGI Symbol;Acc:MGI:3647929]	-	13	7	7	9	16	10	22	19	21	17	18	21	0.953594466423552	0.463959187611787	0.658392497052583	0.733611876293658	1.27106516397303	0.811698840881642	1.67392247029085	1.43476808701602	1.7969497262517	1.26831670295069	1.32136164205589
ENSMUSG00000017692	392.520421752011	178.253435315661	280.633871795129	315.028460442682	332.730340105632	417.359697082488	462.174979537181	530.600413991661	530.779024646669	366.568023625878	409.873302442681	399.627980331994	319.421037748934	449.937287429344	-0.494423033292344	0.00999905700103236	0.151147854803691	Rhbdl3	11	80191738	80246781	+	4734	protein_coding	rhomboid like 3 [Source:MGI Symbol;Acc:MGI:2179276]	-	424	202	235	304	334	406	478	555	497	387	438	376	2.93673998297623	1.26419008045805	2.08705533987835	2.33978901201222	2.50537979048961	3.11171797720495	3.43415445843574	3.95731261943133	4.01561705830517	2.7262710073155	3.03600561483776
ENSMUSG00000030664	42.5847627372465	12.354198487224	48.9616542280864	53.8864471809851	31.8783559382641	60.6507934183911	90.887966687228	94.6476414147287	96.1169259923546	41.676984598291	69.2480008693114	63.7704223934032	41.7193686650329	76.0579903258862	-0.870730351934976	0.0100497823840383	0.151470868084254	Sox6os	7	115631214	115631785	+	420	lncRNA	SRY (sex determining region Y)-box 6, opposite strand [Source:MGI Symbol;Acc:MGI:1915719]	-	46	14	41	52	32	59	94	99	90	44	74	60	3.59117388619067	0.987570270773661	4.10420384132065	4.51113080755815	2.70555299188544	5.09688893585037	7.61199938925121	7.95649024495239	8.19629109831131	3.49373290106921	5.78148153385249
ENSMUSG00000058297	280.503980638819	925.682443792715	681.880599127739	488.086858120077	828.837254394867	343.345169521061	1268.56396057067	693.126666926043	921.654523682245	1029.61096041687	1442.04282891363	616.447416469564	591.38938426588	995.241059496505	-0.750989556462921	0.0100763452588224	0.151608301154159	Spock2	10	59942041	59971020	+	5533	protein_coding	sparc/osteonectin, cwcv and kazal-like domains proteoglycan 2 [Source:MGI Symbol;Acc:MGI:1891351]	-	303	1049	571	471	832	334	1312	725	863	1087	1541	580	1.79560105280029	5.6169955577891	4.33880162583487	3.10164153662345	5.33971420050407	2.19022254736937	8.06479525833968	4.42295954226524	5.96587680280723	6.5517178690425	9.13900009852436
ENSMUSG00000093898	0	0	0	0	0.996198623070754	0	4.83446631315042	2.86811034590087	1.0679658443595	3.78881678166282	0.935783795531235	3.18852111967016	0.166033103845126	2.78061070004583	-3.43054915475717	0.0100770972326361	1	Gm33933	14	15879160	15885814	+	1756	protein_coding	predicted gene, 33933 [Source:MGI Symbol;Acc:MGI:5593092]	-	0	0	0	0	1	0	5	3	1	4	1	3	0	0	0	0	0.0202223137918545	0	0.0968424291028179	0.0576676658880376	0.0217820947942973	0.0759664432827224	0.0186866822955892
ENSMUSG00000096956	311.979674835915	282.381679707978	339.149019531135	267.359680244119	258.015443375325	307.365885289812	436.068861446168	348.953425417939	461.361244763302	329.627060004665	464.148762583493	274.212816291634	294.375230497381	385.728695084534	-0.390799569622128	0.0101335756918243	0.152224637717944	Snhg18	15	32240711	32244848	-	1526	lncRNA	small nucleolar RNA host gene 18 [Source:MGI Symbol;Acc:MGI:1914085]	-	337	320	284	258	259	299	451	365	432	348	496	258	7.24107857785954	6.21276186069931	7.82452824525663	6.16022449726536	6.02699161323105	7.10917334078336	10.0517618325755	8.07372515820857	10.8281276895122	7.60520673210227	10.665564743829
ENSMUSG00000024414	670.247135255793	480.048855503562	613.811957883814	593.78719682124	701.323830641811	766.872743900335	889.541801619678	921.619457816146	866.120299775551	670.620570354319	748.627036424988	737.611219017031	637.681953334426	805.690064167952	-0.33766416351163	0.0101614978599309	0.152265077806264	Mrpl27	11	94544593	94550915	+	985	protein_coding	mitochondrial ribosomal protein L27 [Source:MGI Symbol;Acc:MGI:2137224]	-	724	544	514	573	704	746	920	964	811	708	800	694	24.1007317438283	16.3625856030722	21.9392231091816	21.1957973476561	25.3800097919	27.4792607998045	31.76667635821	33.0351614661983	31.4926189950005	23.9708448422229	26.6508134912119
ENSMUSG00000036395	7133.87351420047	4166.01221844176	5446.68548620249	8810.43411409107	6323.86885925314	6565.7053824282	8588.91285194305	10699.0076269922	8351.49290289126	6552.75862388585	9216.53460218713	8492.09458205486	6407.76326243619	8650.13353165906	-0.432921627075098	0.0102169733627464	0.15228553473491	Glb1l2	9	26674340	26717764	-	9043	protein_coding	galactosidase, beta 1-like 2 [Source:MGI Symbol;Acc:MGI:2388283]	-	7706	4721	4561	8502	6348	6387	8883	11191	7820	6918	9849	7990	27.9411557970225	15.4671654815519	21.2051767908628	34.2562592673911	24.9275584873842	25.6263547719765	33.409295118808	41.7726469372818	33.0764108313289	25.5125777045797	35.7384999645889
ENSMUSG00000044627	1420.109261716	1516.91908568129	1498.70429405484	1600.0129701431	1399.65906541441	1787.65643651834	2035.31031783633	2102.32488354534	1780.29906254728	1566.67573921758	1946.43029470497	1642.08837663013	1537.17685225466	1845.52144574694	-0.263958633319376	0.0102362510230008	0.15228553473491	Swi5	2	32168828	32178087	-	5551	protein_coding	SWI5 recombination repair homolog (yeast) [Source:MGI Symbol;Acc:MGI:1920181]	-	1534	1719	1255	1544	1405	1739	2105	2199	1667	1654	2080	1545	9.06112299152885	9.17474308481313	9.50532246336679	10.1346192165144	8.98794598108224	11.3666059282841	12.8973668919861	13.3717926161873	11.4865214467297	9.93689249977382	12.2955743741657
ENSMUSG00000068874	3204.96627383364	2011.96946791934	2532.8699662871	3422.82567382296	3394.04870880206	2974.97281614956	4078.3557817737	5280.1911468035	3804.09433760852	2773.41388417719	4626.51508510643	3313.93628371052	2923.60881780244	3979.41775319664	-0.444857993685199	0.0102398335451561	0.15228553473491	Selenbp1	3	94840367	94852069	+	2273	protein_coding	selenium binding protein 1 [Source:MGI Symbol;Acc:MGI:96825]	-	3462	2280	2121	3303	3407	2894	4218	5523	3562	2928	4944	3118	49.9408029751591	29.718348667364	39.2315610177294	52.9468960378787	53.2265177932325	46.1956986864773	63.114234810223	82.0183896226064	59.940261693883	42.9593745992368	71.3732938693596
ENSMUSG00000023064	14311.2575468499	5148.17099817607	9971.45884889076	14510.9984591411	13277.335248287	16890.7319772472	21186.5651707504	22098.7902151662	18176.7786709986	13174.663154037	20664.9135567163	16560.1158551936	12351.658846432	18643.637770477	-0.593990071020525	0.0102415686839616	0.15228553473491	Sncg	14	34092231	34096746	-	852	protein_coding	synuclein, gamma [Source:MGI Symbol;Acc:MGI:1298397]	-	15459	5834	8350	14003	13328	16431	21912	23115	17020	13909	22083	15581	594.935241497782	202.869188721603	412.041763183084	598.842839772017	555.495756890282	699.724128353666	874.707008031845	915.777425013886	764.089296911431	544.430724146609	850.501710110823
ENSMUSG00000021974	80.5407469160967	169.429007824787	82.3988815058039	78.7571151106706	154.410786575967	46.2590797258915	227.21991671807	152.965885114713	120.680140412623	173.338367761074	308.808652525308	114.786760308126	101.965936276536	182.966620473319	-0.84238618725904	0.010314401894801	0.152781461176675	Fgf9	14	58308004	58350177	+	4649	protein_coding	fibroblast growth factor 9 [Source:MGI Symbol;Acc:MGI:104723]	-	87	192	69	76	155	45	235	160	113	183	330	108	0.613603176940376	1.22357598615967	0.623999010127918	0.595642137172825	1.18393404342158	0.351200735305103	1.71920829398016	1.1617055573172	0.92970047447684	1.31273739600002	2.32922319996732
ENSMUSG00000037606	1325.68217912472	1444.55878025612	1310.02279727343	1648.71802817206	1517.21050293676	1487.48640807478	1874.80603623973	1865.22776161753	1514.37556730176	1563.83412663133	1740.5578596881	1698.41891641097	1455.61311597298	1709.53671131491	-0.232032948984014	0.0103778304380256	0.153290498071225	Osbpl5	7	143242499	143310722	-	4915	protein_coding	oxysterol binding protein-like 5 [Source:MGI Symbol;Acc:MGI:1930265]	-	1432	1637	1097	1591	1523	1447	1939	1951	1418	1651	1860	1598	9.55316742054279	9.86766551326439	9.38377231397203	11.7944589882874	11.0035225507976	10.6818741723665	13.4175884994229	13.3989071519239	11.0351150141523	11.2023687610257	12.4178421661367
ENSMUSG00000058833	1014.62826000048	826.848855894923	1184.63319498199	1075.6563879589	905.544548371315	1360.01694394121	1397.16076450047	1446.48365111601	1312.53002271782	1201.05491978711	1253.01450221632	1325.36194540956	1061.22136519147	1322.60096762455	-0.318253676210696	0.0103784767736058	0.153290498071225	Rex1bd	8	70956942	70959402	-	1822	protein_coding	required for excision 1-B domain containing [Source:MGI Symbol;Acc:MGI:1913712]	-	1096	937	992	1038	909	1323	1445	1513	1229	1268	1339	1247	19.723776586781	15.2363338701688	22.8906252636855	20.7577533866319	17.7162119450128	26.3459534697819	26.9736461530266	28.0301993095469	25.8004728572163	23.2090409364512	24.1150917094963
ENSMUSG00000058934	16.6636028102269	10.5893129890492	9.55349350791929	8.29022264322848	6.97339036149528	21.5875705387494	21.2716517778619	45.8897655344139	12.8155901323139	30.3105342533026	17.7798921150935	27.6338497038081	12.2762654751114	25.9502139194656	-1.07887480955969	0.0103936966109088	0.153368951229989	Igf1os	10	87662239	87699243	-	2607	lncRNA	insulin-like growth factor 1, opposite strand [Source:MGI Symbol;Acc:MGI:3841250]	-	18	12	8	8	7	21	22	48	12	32	19	26	0.226391109050896	0.13637334003779	0.129015922486714	0.111809916448285	0.095348170743949	0.292267626365783	0.287013173847339	0.621492420709745	0.176061488878187	0.409350439292553	0.239149393214438
ENSMUSG00000015291	3000.37426155252	2883.82290401772	2647.51188838213	2917.12209258602	3055.341176958	2870.1189021042	3569.76992563027	3610.95092548919	3055.45028071252	3051.8919176294	3653.29993775394	3060.98027488335	2895.71520426677	3333.72387701645	-0.20318956173482	0.0104920557159183	0.154271691446339	Gdi1	X	73348604	73355468	+	4296	protein_coding	guanosine diphosphate (GDP) dissociation inhibitor 1 [Source:MGI Symbol;Acc:MGI:99846]	-	3241	3268	2217	2815	3067	2792	3692	3777	2861	3222	3904	2880	24.7367506546052	22.5375673525721	21.6968045419863	23.8751161804183	25.3515699994713	23.5805315221711	29.2292452478022	29.676886968328	25.4728618600063	25.0119514508364	29.8196299556698
ENSMUSG00000090555	4.62877855839636	17.6488549817486	0	7.25394481282492	4.98099311535377	19.5316114398209	51.2453429193945	23.9009195491739	23.4952485759089	26.5217174716397	23.3945948882809	9.56556335901048	9.00736381802409	26.3538977939014	-1.53880123016474	0.0105652578345871	0.155013863527558	Gm8893	12	103784115	103788502	-	1242	unprocessed_pseudogene	predicted gene 8893 [Source:MGI Symbol;Acc:MGI:3779818]	-	5	20	0	7	5	19	53	25	22	28	25	9	0.132000720454394	0.477087087330271	0	0.205356196182041	0.14295645337559	0.555052999646359	1.45135767982948	0.679444587355033	0.677524868030028	0.751835362988103	0.660503504650859
ENSMUSG00000052562	2.77726713503782	17.6488549817486	1.19418668848991	0	7.96958898456603	1.02797954946426	100.556899313529	36.3293977147443	41.6506679300203	3.78881678166282	2.80735138659371	1.06284037322339	5.1029795565511	31.0326622499622	-2.59061047473837	0.0106107037662803	0.15548033136997	Slc22a30	19	8312735	8382475	-	3368	protein_coding	solute carrier family 22, member 30 [Source:MGI Symbol;Acc:MGI:2442750]	-	3	20	1	0	8	1	104	38	39	4	3	1	0.0292063351789234	0.175932946099821	0.0124830949347856	0	0.0843477031318205	0.0107728438798721	1.05022278933925	0.380844023097484	0.442911217307796	0.0396072073647448	0.0292284567497518
ENSMUSG00000033429	315.682697682632	348.564885889535	326.012965957746	419.692521313442	359.627702928542	451.283022214808	599.473822830653	538.248708247397	602.332736218755	343.835122935901	433.267897330962	436.827393394812	370.143965997784	492.330946826413	-0.411378587365818	0.0107058565827582	0.156188458100391	Mcee	7	64042355	64061873	+	956	protein_coding	methylmalonyl CoA epimerase [Source:MGI Symbol;Acc:MGI:1920974]	-	341	395	273	405	361	439	620	563	564	363	463	411	11.6956504452481	12.2413260550919	12.0060213400813	15.4357770833127	13.4092555122147	16.6613073894066	22.0573827223473	19.8786154782283	22.5655210991165	12.6629545002142	15.8920459554585
ENSMUSG00000002058	1740.42073795703	1038.63511567591	1350.62514468209	1740.94675507798	1267.164648546	1608.78799491156	1765.54709756254	2159.68709046335	2146.61134716259	1610.2471322067	1967.95332200219	1652.71678036237	1457.76339947509	1883.79379495995	-0.369960460307224	0.0107414312181157	0.156435209091596	Unc119	11	78234308	78239990	+	2448	protein_coding	unc-119 lipid binding chaperone [Source:MGI Symbol;Acc:MGI:1328357]	-	1880	1177	1131	1680	1272	1565	1826	2259	2010	1700	2103	1555	25.1810786137411	14.2447329497622	19.4243076349447	25.005136829225	18.4514735292187	23.1955875258561	25.3693617525576	31.1487374340048	31.4057232443464	23.15921430633	28.1893182498154
ENSMUSG00000025151	7360.68366356189	5881.48092266773	7126.90615690779	7943.06957004329	7134.77453843274	8097.39491112994	7541.76744851466	8952.32842633858	8696.44587061937	8469.89991540724	9016.27686994345	8443.20392488659	7257.38496045723	8519.98707595165	-0.231472255370312	0.0107617116011989	0.156435209091596	Maged1	X	93579080	93585749	-	4351	protein_coding	MAGE family member D1 [Source:MGI Symbol;Acc:MGI:1930187]	-	7951	6665	5968	7665	7162	7877	7800	9364	8143	8942	9635	7944	59.9184490273243	45.3837452634322	57.667893450346	64.1880885418557	58.4521634517287	65.6862110094745	60.9713345408171	72.6453720253984	71.5845842173972	68.5380739671734	72.6640080349373
ENSMUSG00000028532	2255.14091365071	1373.08091758004	2059.9720376451	2805.20408690244	2261.37087437061	2428.08769583457	2278.96742001911	3094.69106322704	2401.85518396451	2902.23365475372	3715.99745205453	3512.68743350329	2197.14275433058	2984.40536792037	-0.44194238658724	0.0108291569741577	0.156889047030393	Cachd1	4	100633872	100886417	+	6020	protein_coding	cache domain containing 1 [Source:MGI Symbol;Acc:MGI:2444177]	-	2436	1556	1725	2707	2270	2362	2357	3237	2249	3064	3971	3305	13.2680984632363	7.65777080393929	12.047223413973	16.3841204329963	13.3901278159447	14.2359302323357	13.3162908662532	18.1502177046588	14.2895028527924	16.9737805637569	21.6451255539864
ENSMUSG00000033088	1326.6079348364	1192.18015401712	1388.83911871377	1343.01606820301	1417.59064062968	1354.87704619389	1653.38747909745	1459.86816606354	1371.26814415759	1640.55766646	1602.06185794947	1475.22243803406	1337.18516043231	1533.72762529369	-0.198573647653464	0.0108450985414123	0.156889047030393	Triobp	15	78831924	78890069	+	12302	protein_coding	TRIO and F-actin binding protein [Source:MGI Symbol;Acc:MGI:1349410]	-	1433	1351	1163	1296	1423	1318	1710	1527	1284	1732	1712	1388	3.81942829222311	3.25363543118651	3.97464502764072	3.83849205440337	4.10756584582348	3.88724699487934	4.72759831592875	4.18985453108369	3.99221071867025	4.69524737580324	4.56651355536706
ENSMUSG00000026475	45.3620298722843	57.358778690683	22.6895470813083	29.0157792512997	51.8023283996792	48.31503882482	175.974573798675	74.5708689934226	99.3208235254331	74.8291314378407	50.5323249586867	28.6966900770315	42.4239170200124	83.9874021318483	-0.981993133906932	0.0108784472924419	0.15707787839525	Rgs16	1	153616095	153621214	+	2339	protein_coding	regulator of G-protein signaling 16 [Source:MGI Symbol;Acc:MGI:108407]	-	49	65	19	28	52	47	182	78	93	79	54	27	0.686900371561649	0.823327074821992	0.341521253128174	0.436173400013844	0.789456997418476	0.729071438567012	2.64643570772362	1.12564127994196	1.52081673222194	1.12637546792993	0.757565610088479
ENSMUSG00000078605	0.925755711679272	0	1.19418668848991	0	0	0	2.90067978789026	2.86811034590087	0	1.89440839083141	6.55048656871864	8.5027229857871	0.353323733361531	3.78606801318805	-3.3929516056068	0.0109139169260658	1	E030025P04Rik	11	109030117	109035195	-	1078	protein_coding	RIKEN cDNA E030025P04 gene [Source:MGI Symbol;Acc:MGI:2685510]	-	1	0	1	0	0	0	3	3	0	2	7	8	0.0304164925425523	0	0.0390009867721316	0	0	0	0.0946504483327727	0.0939373110383989	0	0.0618724834900096	0.213076715006849
ENSMUSG00000020303	387.891643193615	362.683969874934	370.197873431872	565.807695400344	420.395818935858	584.920363645161	590.771783466982	646.280864609663	543.594614778983	633.679606733107	731.782928105426	450.644318246716	448.649560746964	599.459019323479	-0.418744586732419	0.0109200125094664	0.157238021985145	Stc2	11	31307307	31320074	-	5175	protein_coding	stanniocalcin 2 [Source:MGI Symbol;Acc:MGI:1316731]	-	419	411	310	546	422	569	611	676	509	669	782	424	2.65479848977876	2.3529935147129	2.51852169265912	3.84426799252781	2.89572591957594	3.98937040166878	4.01560547490933	4.40932359409922	3.76211081266128	4.31123878147749	4.95853191011493
ENSMUSG00000005882	960.934428723084	738.604580986179	985.204018004177	983.427661052979	714.27441274173	875.838576143546	1200.88143218657	1298.29794991113	998.548064476128	969.937096105682	1041.52736442626	1008.63551418899	876.380612941949	1086.30457021579	-0.310455014471827	0.0109881503274512	0.157778830165693	Uqcc1	2	155688814	155772230	-	6044	protein_coding	ubiquinol-cytochrome c reductase complex assembly factor 1 [Source:MGI Symbol;Acc:MGI:1929472]	-	1038	837	825	949	717	852	1242	1358	935	1024	1113	949	5.63119790889882	4.10289369608316	5.73883646356638	5.72101549303991	4.21259838257147	5.1146696452139	6.98903671200029	7.58422039072232	5.9171327198817	5.65017389932857	6.04264975274717
ENSMUSG00000012705	13844.6766681635	4719.30382211958	10174.470585934	15980.4404226533	13351.0539463942	17851.8928559963	19882.2261594624	23802.4477606313	16863.1806824364	17006.1041244936	21071.0437239768	17307.2926375696	12653.6397168768	19322.0491814284	-0.61071121845274	0.0110094541218546	0.157938220901008	Retn	8	3705770	3710110	+	1579	protein_coding	resistin [Source:MGI Symbol;Acc:MGI:1888506]	-	14955	5348	8520	15421	13402	17366	20563	24897	15790	17954	22517	16284	310.550462545808	100.345645499003	226.856810049303	355.845742643942	301.399717044895	399.04338477679	442.919220657381	532.231432782566	382.493584587861	379.197446779241	467.934548662836
ENSMUSG00000030546	42818.9789323014	17417.6549814877	31649.5298050481	47566.1886933538	35075.1573196982	41348.4214181007	48649.2345092327	55074.4108987705	49037.787675455	45288.6741954111	56641.1215759146	48059.5159964151	35979.3218583316	50458.4574751998	-0.487934205772836	0.0110354682619025	0.158164827061101	Plin1	7	79369966	79382651	-	4649	protein_coding	perilipin 1 [Source:MGI Symbol;Acc:MGI:1890505]	-	46253	19738	26503	45901	35209	40223	50315	57607	45917	47813	60528	45218	326.218249919807	125.786160493852	239.678924136525	359.744338662761	268.936346676326	313.91882613727	368.093469411114	418.264825252326	377.779262712859	342.983131775676	427.221884386732
ENSMUSG00000109564	37.0302284671709	172.076336072049	176.739629896507	81.8659486018813	270.966025475245	28.7834273849992	331.644389082119	210.32809203273	201.845544583945	310.682976096351	494.093844040492	155.174694490615	127.910265982975	283.961590054375	-1.15113346766476	0.0110721535661734	0.158178958092253	Muc16	9	18406751	18585826	-	26350	protein_coding	mucin 16 [Source:MGI Symbol;Acc:MGI:1920982]	-	40	195	148	79	272	28	343	220	189	328	528	146	0.0497745411170723	0.21925184379605	0.236143204310169	0.109239030940578	0.366558792448996	0.0385549248291257	0.442724628372372	0.281823816393001	0.274350237142716	0.4151256205376	0.657521588259464
ENSMUSG00000039405	823.922583394552	935.389314032676	1176.27388816256	808.296707714777	1290.07721687663	934.433410463008	1613.74485532961	1157.76054296198	1206.80140412623	1524.05155042387	1519.71288394273	948.053612915261	994.732186774034	1328.35414161661	-0.417739910873977	0.0110725404465456	0.158178958092253	Prss23	7	89156991	89176395	-	3767	protein_coding	protease, serine 23 [Source:MGI Symbol;Acc:MGI:1923703]	-	890	1060	985	780	1295	909	1669	1211	1130	1609	1624	892	7.74679885191811	8.33680239198365	10.9934743255249	7.54449803228466	12.2075779158356	8.75529355252326	15.0688773499916	10.8513595428339	11.4737921577989	14.2444845179703	14.1464385761489
ENSMUSG00000094689	0	7.05954199269945	8.35930681942938	1.03627783040356	5.97719173842452	15.4196932419638	51.2453429193945	26.7690298950748	44.8545654630988	8.52483775874135	2.80735138659371	13.816924851904	6.30866860382012	24.6696753791345	-1.97183977030828	0.0110962630134311	0.158178958092253	Ighv1-81	12	115883899	115884332	-	351	IG_V_gene	immunoglobulin heavy variable 1-81 [Source:MGI Symbol;Acc:MGI:4439635]	-	0	8	7	1	6	15	53	28	42	9	3	13	0	0.675261723605922	0.838465658639615	0.103806428839274	0.607015094333273	1.55055291399185	5.13557332862738	2.69269116465625	4.57684631130774	0.855109451310645	0.280459949667134
ENSMUSG00000026986	419.36733739071	243.554198748131	349.896699727544	531.610526997026	411.430031328221	472.870592753558	622.679261133775	651.061048519497	460.293278918943	428.136296327899	706.516765626082	528.231665492023	404.788231157532	566.153052669703	-0.484653324481805	0.0111238149467902	0.158178958092253	Hnmt	2	23892922	23939406	-	1769	protein_coding	histamine N-methyltransferase [Source:MGI Symbol;Acc:MGI:2153181]	-	453	276	293	513	413	460	644	681	431	452	755	497	8.39649941734015	4.62243179310679	6.96360524359799	10.5662504217559	8.29043990200058	9.43479455410306	12.3816412374143	12.9943604493852	9.31909185739786	8.52112459451896	14.0047652085055
ENSMUSG00000050382	225.884393649742	117.364885628628	177.933816584997	215.545788723941	196.251128744938	172.700564309995	241.723315657521	271.514446078616	258.447734334998	228.276211095185	273.248868295121	201.939670912444	184.280096273707	245.858374395647	-0.417104098334241	0.0113015797788947	0.15965066597659	Kif7	7	79347846	79365468	-	4581	protein_coding	kinesin family member 7 [Source:MGI Symbol;Acc:MGI:1098239]	-	244	133	149	208	197	168	250	284	242	241	292	190	1.7464551116465	0.860162711282888	1.36747795182565	1.65437672051903	1.52707824812133	1.33061200949242	1.85609370775538	2.09263593458691	2.02059479306401	1.75445835688032	2.09160308238986
ENSMUSG00000079355	38.8817398905294	97.0687023996174	52.5442142935561	32.1246127425104	112.570444406995	27.7554478355349	87.9872868993377	108.032156362266	161.262842498284	115.558911840716	118.844542032467	75.4616664988605	60.1575269281239	111.191234355322	-0.883722457493129	0.0113782381018079	0.160258187059039	Ackr4	9	103961356	104004132	-	5380	protein_coding	atypical chemokine receptor 4 [Source:MGI Symbol;Acc:MGI:2181676]	-	42	110	44	31	113	27	91	113	151	122	127	71	0.25597344170197	0.605758716273807	0.343846617950882	0.209947537583668	0.74585005224723	0.182089094992575	0.57528002977375	0.708976431650033	1.07354147347151	0.756247354895176	0.77460118812341
ENSMUSG00000036585	2109.79726691706	1586.6320628592	2626.01652798931	2364.78600898092	2872.04063031298	2161.84099252333	2703.43356231372	2815.52832289269	2581.2734458169	3660.9442152817	3815.19053438085	2552.94257648258	2286.8522482638	3021.55210952807	-0.402216508258403	0.0114227240827439	0.160446775024313	Fgf1	18	38971726	39062525	-	5463	protein_coding	fibroblast growth factor 1 [Source:MGI Symbol;Acc:MGI:95515]	-	2279	1798	2199	2282	2883	2103	2796	2945	2417	3865	4077	2402	13.6785800936895	9.75096840665043	16.9234298306877	15.2200404511329	18.7399659971307	13.9672375998759	17.4070889324809	18.1965782370319	16.9226980404331	23.5941649539282	24.4887278291726
ENSMUSG00000092569	128.680043923419	141.190839853989	157.632642880668	128.498450970041	114.562841653137	106.909873144283	170.173214222895	195.031503521259	143.107423144172	129.766974771952	245.175354429184	179.620023074752	129.579115404256	177.145748860702	-0.452893965769194	0.011461868191155	0.160850641641784	Gm20544	18	75491711	75500160	-	2931	lncRNA	predicted gene 20544 [Source:MGI Symbol;Acc:MGI:5142009]	-	139	160	132	124	115	104	176	204	134	137	262	169	1.55498740210205	1.6173105764973	1.89344401696596	1.54147765568084	1.39327671345175	1.28741916461637	2.04228821349713	2.3493622137014	1.74869124308336	1.55880238770139	2.93320344493222
ENSMUSG00000069835	120.348242518305	75.890076421519	138.52565586483	115.026839174795	120.540033391561	144.94511647446	198.213118839167	191.207356393391	138.835559766734	134.50299574903	183.413623924122	141.35776963871	119.212660640912	164.588404051859	-0.469362141667744	0.0115100071142921	0.161233846264369	Sat2	11	69512850	69514696	+	1424	protein_coding	spermidine/spermine N1-acetyl transferase 2 [Source:MGI Symbol;Acc:MGI:1916465]	-	130	86	116	111	121	141	205	200	130	142	196	133	2.9933758882818	1.78927759732868	3.42485631592803	2.84017013624083	3.01738507390314	3.5926223907477	4.89625528489219	4.74084369379186	3.49186558963637	3.32555908803255	4.51650812202719
ENSMUSG00000050541	19.4408699452647	49.4167939488961	35.8256006546973	29.0157792512997	32.8745545613349	17.4756523408923	124.729230879281	83.1752000311252	57.6701555954128	35.0465552303811	46.7891897765617	24.4453285841379	30.6748751170642	61.9759433494833	-1.01464556697269	0.011532936362883	0.161306829873326	Adra1b	11	43665433	43792037	-	3382	protein_coding	adrenergic receptor, alpha 1b [Source:MGI Symbol;Acc:MGI:104774]	-	21	56	30	28	33	17	129	87	54	37	50	23	0.203598036126049	0.49057304994079	0.372942611534812	0.301658658377404	0.346493979778351	0.182380233348894	1.29728766470057	0.86832295023135	0.610723050495106	0.364850070443897	0.485124395491642
ENSMUSG00000081189	420.293093102389	139.425954355814	198.234990289325	429.019021787074	526.989071604429	484.178367797664	742.574025699905	812.631264671913	404.759055012249	438.555542477472	684.057954533333	605.819012737331	366.356749822783	614.7328091887	-0.746758372778169	0.0116417813544223	0.162068400439661	Hspd1-ps4	4	105993308	105994975	-	1668	processed_pseudogene	heat shock protein 1 (chaperonin), pseudogene 4 [Source:MGI Symbol;Acc:MGI:3649750]	-	454	158	166	414	529	471	768	850	379	463	731	570	8.92457820637626	2.80640472629925	4.18414183507158	9.04348165488621	11.2619859812857	10.2453620421282	15.6597691399872	17.2011906683623	8.690951352446	9.25702120042945	14.3806343616193
ENSMUSG00000029597	1.85151142335854	43.2396947052841	5.97093344244956	4.14511132161424	10.9581848537783	18.5036318903566	140.199523081362	71.7027586475217	56.6021897510533	17.9968797128984	6.55048656871864	15.9426055983508	14.1115112728069	51.4990738933175	-1.86139141171537	0.011642874945985	0.162068400439661	Sds	5	120614591	120621997	+	1694	protein_coding	serine dehydratase [Source:MGI Symbol;Acc:MGI:98270]	-	2	49	5	4	11	18	145	75	53	19	7	15	0.038711899599612	0.856982466373838	0.124094048820419	0.0860355525917002	0.230586902717509	0.385532991365625	2.91121833508377	1.49445722106544	1.19670365898209	0.37404728655324	0.135594273186176
ENSMUSG00000026237	0	0	0	0	0	0	4.83446631315042	0	4.27186337743798	2.84161258624712	1.87156759106247	3.18852111967016	0	2.83467183126136	-3.93485089993373	0.0116606883168595	1	Nmur1	1	86314025	86353950	-	1695	protein_coding	neuromedin U receptor 1 [Source:MGI Symbol;Acc:MGI:1341898]	-	0	0	0	0	0	0	5	0	4	3	2	3	0	0	0	0	0	0	0.10032761386699	0	0.090263972764097	0.0590252541612657	0.0387183647328079
ENSMUSG00000040612	108.313418266475	272.674809468016	207.788483797245	152.332841069323	451.277976251051	143.917136924996	480.545951527152	351.82153576384	233.88451991473	500.123815179492	659.727575849521	216.819436137571	222.717444296184	407.153805728718	-0.87057533603474	0.0116742709747996	0.16235942535393	Ildr2	1	166081708	166144392	+	8251	protein_coding	immunoglobulin-like domain containing receptor 2 [Source:MGI Symbol;Acc:MGI:1196370]	-	117	309	174	147	453	140	497	368	219	528	705	204	0.464950980295958	1.10953537875068	0.886618966285573	0.649145595542359	1.94960653343581	0.615635843684077	2.04866044929731	1.5054864880288	1.01522354896063	2.13409451234866	2.80374972103909
ENSMUSG00000095040	4.62877855839636	0.882442749087431	4.77674675395965	8.29022264322848	1.99239724614151	7.19585684624979	17.4040787273415	14.3405517295043	4.27186337743798	5.68322517249423	19.6514597061559	18.0682863447976	4.62774079951054	13.2365775096219	-1.53088762017659	0.0117131384299615	1	1700001J03Rik	5	146119251	146122114	-	868	protein_coding	RIKEN cDNA 1700001J03 gene [Source:MGI Symbol;Acc:MGI:1916532]	-	5	1	4	8	2	7	18	15	4	6	21	17	0.188876606917462	0.0341326130451726	0.19374683751317	0.335816189148249	0.0818211590287937	0.292604340221043	0.705298502092596	0.583320399190058	0.176264324694867	0.23052489816439	0.793882599461001
ENSMUSG00000003273	74.986212646021	112.952671883191	114.641922095031	89.1198934147062	136.479211360693	92.518159451783	198.213118839167	138.625333385209	143.107423144172	93.7732153461548	184.349407719653	140.294929265487	103.449678475238	149.727237949974	-0.534383662605666	0.0117510688745658	0.163029922375245	Car11	7	45349267	45354106	+	1926	protein_coding	carbonic anhydrase 11 [Source:MGI Symbol;Acc:MGI:1336193]	-	81	128	96	86	137	90	205	145	134	99	197	132	1.37897575069085	1.96898745574811	2.09560442319541	1.62694748750899	2.52592028740084	1.69546440128081	3.62007659692963	2.54124975569611	2.66117031852406	1.71421474117882	3.35634547241837
ENSMUSG00000025510	7692.10420834307	4635.47176095627	6859.40833868605	7472.59943504007	7483.4440565075	8239.25608895601	8690.4366445192	9068.96491373855	8644.11554424576	8477.47754897056	9093.01114117701	8697.22277408698	7063.71398141483	8778.53809445634	-0.313610787081258	0.0117540792926399	0.163029922375245	Cd151	7	141047305	141051386	+	2741	protein_coding	CD151 antigen [Source:MGI Symbol;Acc:MGI:1096360]	-	8309	5253	5744	7211	7512	8015	8988	9486	8094	8950	9717	8183	99.3957045552281	56.7789853962865	88.1048369662953	95.8556744196865	97.3199552115817	106.095494189014	111.525507907689	116.817986190691	112.947941395627	108.893087916812	116.326826602378
ENSMUSG00000023175	7630.07857566056	7812.26565767102	8680.54303863316	7813.53484124284	7698.62295909078	7573.12534090317	9311.18211912772	8967.62501485005	9227.22489526604	7855.16439258244	8625.11924341139	8967.18422888572	7868.02840220026	8825.58331568723	-0.165757692285462	0.0118035205903033	0.163320794457351	Bsg	10	79540325	79547803	+	1814	protein_coding	basigin [Source:MGI Symbol;Acc:MGI:88208]	-	8242	8853	7269	7540	7728	7367	9630	9380	8640	8293	9217	8437	148.978370780321	144.591393723692	168.47355585924	151.448658313281	151.281278923341	147.351932539496	180.554861301962	174.542497572274	182.179965316379	152.461678340159	166.728183385662
ENSMUSG00000085042	13.8863356751891	22.9435114762732	16.7186136388588	20.7255566080712	24.9049655767688	38.0352433301775	51.2453429193945	40.1535448426122	46.9904971518178	29.3633300578869	26.2019462748746	41.4507745557121	22.8690377175564	39.234239300383	-0.776400033524457	0.011838976753443	0.16338081205424	Abhd11os	5	135040849	135042107	-	1080	transcribed_unitary_pseudogene	abhydrolase domain containing 11, opposite strand [Source:MGI Symbol;Acc:MGI:1917062]	-	15	26	14	20	25	37	53	42	44	31	28	39	0.455402485567658	0.713245195558755	0.54500267811575	0.674741787455278	0.82199960690964	1.24302658605014	1.6690613318039	1.31268694276992	1.55830719646906	0.957247524661638	0.850728513990307
ENSMUSG00000022235	2459.73292593183	1704.87939123692	2008.62201004003	3161.68366056126	2096.00190294087	2434.25557313136	3121.13145176991	3812.67468648422	3546.71456911788	1976.81515583258	3259.33495983529	3077.98572085493	2310.86257730704	3132.4427573158	-0.438867694556013	0.0118427076119166	0.16338081205424	Cmbl	15	31565535	31590265	+	1424	protein_coding	carboxymethylenebutenolidase-like (Pseudomonas) [Source:MGI Symbol;Acc:MGI:1916824]	-	2657	1932	1682	3051	2104	2368	3228	3988	3321	2087	3483	2896	61.1799979628056	40.1963292795234	49.6604165809564	78.066298069106	52.4675883924976	60.3356724914224	77.0981076079609	94.5324232542096	89.2037355629415	48.8763508219995	80.2601928011261
ENSMUSG00000055795	2.77726713503782	3.52977099634972	0	1.03627783040356	3.98479449228301	0	0.966893262630085	9.56036781966956	8.54372675487596	15.1552671266513	4.67891897765618	11.6912441054573	1.88801840901235	8.43273634115672	-2.1205863626346	0.0118516070173043	1	Gm5160	18	14557925	14558360	+	436	processed_pseudogene	predicted gene 5160 [Source:MGI Symbol;Acc:MGI:3648528]	-	3	4	0	1	4	0	1	10	8	16	5	11	0.225612240556454	0.271808331405595	0	0.083568936978406	0.325783330444922	0	0.078007020873646	0.774192823389863	0.701823090986901	1.22382637068312	0.376305207695581
ENSMUSG00000026176	2518.05553576762	2263.46565140926	2487.49087212449	2427.99895663554	2413.78926370044	2654.24319671671	3313.5432110333	2900.61559648775	2751.08001507006	2810.3548477984	2860.69106293899	2440.2814969209	2460.84057939234	2846.09437170823	-0.210089422113376	0.0118940468622647	0.163706591175241	Ctdsp1	1	74430668	74436444	+	3334	protein_coding	CTD (carboxy-terminal domain, RNA polymerase II, polypeptide A) small phosphatase 1 [Source:MGI Symbol;Acc:MGI:2654470]	-	2720	2565	2083	2343	2423	2582	3427	3034	2576	2967	3057	2296	26.7504567407229	22.7935010006098	26.2674570399416	25.6057829731304	25.8073359489553	28.0991440911491	34.9597799618528	30.717481925851	29.5531935782343	29.6782483321862	30.0875314149653
ENSMUSG00000039656	858.175544726685	941.566413276288	871.756282597635	812.441819036391	820.867665410301	957.048960551222	1254.06056163122	1018.17917279481	1073.30567358129	862.903022023708	1034.97687785755	1020.32675829445	876.97611426642	1043.95867769717	-0.251226052529273	0.0119049640872285	0.163706591175241	Rxrb	17	34250786	34257373	+	3973	protein_coding	retinoid X receptor beta [Source:MGI Symbol;Acc:MGI:98215]	RXR-like	927	1067	730	784	824	931	1297	1065	1005	911	1106	960	7.65048665913107	7.95673908066068	7.72500290220519	7.18999957556171	7.36485165045081	8.50224401018831	11.10303202816	9.04829337057259	9.67546067230809	7.64691258384493	9.13467868281563
ENSMUSG00000046733	46.2877855839636	66.1832061815573	42.9907207856368	47.6687801985638	62.7605132534575	44.203120626963	54.1460227072848	93.6916046327617	57.6701555954128	92.8260111507391	98.2572985307797	66.9589435130734	51.682354438357	77.2583393550086	-0.578481996612252	0.0119086259876815	0.163706591175241	Gprc5a	6	135042649	135061707	+	2083	protein_coding	G protein-coupled receptor, family C, group 5, member A [Source:MGI Symbol;Acc:MGI:1891250]	-	50	75	36	46	63	43	56	98	54	98	105	63	0.787061424888895	1.06674657188706	0.726620400697495	0.804636869917864	1.07400582341108	0.748999684137592	0.914363620571743	1.58808021880951	0.991582024375636	1.56900063509807	1.65408088413862
ENSMUSG00000028470	542.492847044053	588.589313641316	423.936274413919	622.80297607254	465.224756974042	838.831312362832	949.489183902743	891.98231757517	734.760500919333	595.791438916479	728.039792923301	803.507322156881	580.312913418117	783.928426065651	-0.433564490873484	0.0120399555895966	0.164466792448764	Hint2	4	43654227	43656466	-	1540	protein_coding	histidine triad nucleotide binding protein 2 [Source:MGI Symbol;Acc:MGI:1916167]	-	586	667	355	601	467	816	982	933	688	629	778	756	12.476845240955	12.8320007260915	9.69174521287469	14.2195259545933	10.7684083569077	19.2252451694325	21.6875727279826	20.4501526130594	17.0880250776915	13.6212272403256	16.5773684275328
ENSMUSG00000097745	2.77726713503782	0	2.38837337697982	2.07255566080712	3.98479449228301	4.11191819785702	3.86757305052034	4.78018390983478	4.27186337743798	32.204942644134	7.48627036424988	7.43988261256371	2.55581814382747	10.0084526597901	-1.98320389365169	0.0120424532912797	1	AI115009	3	152372550	152387069	+	1853	lncRNA	expressed sequence AI115009 [Source:MGI Symbol;Acc:MGI:2139623]	-	3	0	2	2	4	4	4	5	4	34	8	7	0.0530852330721069	0	0.045378374247553	0.0393265585780734	0.076654901281158	0.0783225864811859	0.0734183725869609	0.0910815086341015	0.0825674224690472	0.611913185341562	0.14166784289716
ENSMUSG00000092564	130.531555346777	87.3618321596556	93.1465617022131	129.534728800445	156.403183822108	155.224911969103	136.331950030842	177.822841445854	171.942500941879	202.701697818961	145.046488307341	221.070797630465	125.367128966717	175.819379362557	-0.487007134151898	0.0122233230430178	0.166175010522206	BC051226	17	34126150	34128341	-	2192	lncRNA	cDNA sequence BC051226 [Source:MGI Symbol;Acc:MGI:3039585]	-	141	99	78	125	157	151	141	186	161	214	155	208	2.10914508826773	1.33808563147709	1.49605792506748	2.07778606994668	2.5433987837153	2.49941773097574	2.187755298918	2.86423089441717	2.80937349993821	3.25581363167821	2.32031988467768
ENSMUSG00000007207	124.977021076702	72.3603054251693	109.865175341072	98.4463938883382	115.559040276207	143.917136924996	148.901562445033	158.702105806515	129.223867167499	147.76385448485	165.633731809029	142.420610011934	110.854178822081	148.77428862081	-0.427064534322711	0.0122606660399102	0.166476183887518	Stx1a	5	135052336	135079954	+	2666	protein_coding	syntaxin 1A (brain) [Source:MGI Symbol;Acc:MGI:109355]	-	135	82	92	95	116	140	154	166	121	156	177	134	1.66035714918141	0.911261390136236	1.45084841114513	1.29835910339294	1.54508793328792	1.90533058748586	1.96462993606155	2.10176218250805	1.73599863972735	1.95142006818228	2.17856155200926
ENSMUSG00000026664	2442.14356740992	3035.60305686076	2495.85017894391	2864.27192323544	2461.60679760783	2621.34785113385	3898.5136349245	3787.81773015308	3090.69315357638	2478.8333794029	3473.62944901194	2943.00499345556	2653.47056253195	3278.74872342073	-0.30523079240068	0.0123337963345921	0.166748003416602	Phyh	2	4923830	4943541	+	1893	protein_coding	phytanoyl-CoA hydroxylase [Source:MGI Symbol;Acc:MGI:891978]	-	2638	3440	2090	2764	2471	2550	4032	3962	2894	2617	3712	2769	45.6932522444684	53.8390131768842	46.4183852178277	53.2008770356181	46.3529616686237	48.8755902683011	72.4419431372782	70.647937522134	58.4752474272198	46.1040865975269	64.3448906393212
ENSMUSG00000061100	5133.31542126156	1569.86565062654	5403.69476541685	4566.87639858849	4642.28558350971	3980.3368155256	5152.57419655572	6893.98123476372	8414.50288770847	4820.32215047052	6213.6044023274	6859.57176878374	4216.06243915479	6392.42610676826	-0.600525659630271	0.012335844358776	0.166748003416602	Retnla	16	48662914	48664824	+	599	protein_coding	resistin like alpha [Source:MGI Symbol;Acc:MGI:1888504]	-	5545	1779	4525	4407	4660	3872	5329	7211	7879	5089	6640	6454	303.530698394043	87.9910272974796	317.604112562803	268.069617854812	276.257737673111	234.536789084556	302.579206355171	406.353779627118	503.116352749208	283.329595844866	363.745785805348
ENSMUSG00000032131	22.2181370803025	81.1847329160436	44.1849074741267	78.7571151106706	63.7567118765282	105.881893594818	98.6231127882687	149.141737986845	51.2623605292558	107.034074081975	184.349407719653	143.483450385157	65.997249675415	122.315690581859	-0.890433338765121	0.0124027520950707	0.167224857609153	Abcg4	9	44184485	44199912	-	5211	protein_coding	ATP binding cassette subfamily G member 4 [Source:MGI Symbol;Acc:MGI:1890594]	-	24	92	37	76	64	103	102	156	48	113	197	135	0.15101429573228	0.523065428389043	0.298521082017509	0.531402858514002	0.436128288847395	0.717164197525075	0.665731765936055	1.01050660287248	0.352325696799412	0.72317546573134	1.24051456148105
ENSMUSG00000027935	340.678101897972	220.610687271858	279.439685106639	290.157792512997	357.635305682401	364.932740059811	413.830316405676	411.095816245791	410.098884234046	364.673615235047	365.891464052713	371.994130628185	308.909052088613	389.597371133576	-0.335030071334582	0.0124313411457305	0.167224857609153	Rab13	3	90121002	90133692	+	2300	protein_coding	RAB13, member RAS oncogene family [Source:MGI Symbol;Acc:MGI:1927232]	-	368	250	234	280	359	355	428	430	384	385	391	350	5.24623663373942	3.22033783947933	4.27742474575814	4.43569383753209	5.54270761027836	5.60019263327406	6.32901484834318	6.31068132735354	6.38597984703212	5.58237757018667	5.5783483988793
ENSMUSG00000020467	4010.37374299461	3021.48397287536	3553.89958494598	4386.56405609827	6349.77002345298	4150.98142073666	5658.25937291126	6085.17411721968	5496.82020091832	5229.51436289011	6864.90992401714	4605.28733717694	4245.51213351731	5656.66088585557	-0.41404826932014	0.0124346411982773	0.167224857609153	Efemp1	11	28803204	28876743	+	2037	protein_coding	epidermal growth factor-containing fibulin-like extracellular matrix protein 1 [Source:MGI Symbol;Acc:MGI:1339998]	-	4332	3424	2976	4233	6374	4038	5852	6365	5147	5521	7336	4333	69.7309066561094	49.8003034923272	61.4237396619072	75.7161645852246	111.11594568478	71.9246462448498	97.7087528534724	105.473415410022	96.6467589530545	90.3884692914859	118.174835698919
ENSMUSG00000044522	26.8469156386989	15.8839694835738	14.3302402618789	31.0883349121068	20.9201710844858	33.9233251323204	29.0067978789025	54.4940965721165	41.6506679300203	24.6273090808083	52.4038925497492	45.7021360486056	23.8321594188441	41.3141500100338	-0.792149218737463	0.0124879871745877	0.167457003123058	A730020M07Rik	3	121428585	121437134	-	2687	lncRNA	RIKEN cDNA A730020M07 gene [Source:MGI Symbol;Acc:MGI:2442643]	-	29	18	12	30	21	33	30	57	39	26	56	43	0.353881797493588	0.198469648759872	0.187762100812912	0.406803757230201	0.277528114398372	0.445603632372352	0.379729003731779	0.71604912716356	0.555163743912415	0.322694820851877	0.683875545299242
ENSMUSG00000028076	8890.03209925605	3639.19389723656	6643.26054806938	9362.77019769617	8557.34617217777	10226.3405580704	10528.500736779	12509.7412920376	10859.0767054474	10100.0383357177	11345.4427370207	11233.159904598	7886.49057875106	11095.9932852667	-0.492604876728895	0.0124951766010163	0.167457003123058	Cd1d1	3	86903141	86906748	-	2570	protein_coding	CD1d1 antigen [Source:MGI Symbol;Acc:MGI:107674]	-	9603	4124	5563	9035	8590	9948	10889	13085	10168	10663	12124	10569	122.518507767022	47.5417096887616	91.0060558706656	128.093295985041	118.690346353652	140.444618322315	144.103674835722	171.860564552863	151.330535723322	138.367023771864	154.799487269427
ENSMUSG00000020441	247.176775018366	233.847328508169	205.400110420265	269.432235904926	219.163697075566	228.211459981065	272.663900061684	266.734262168781	285.146880443985	263.322766325566	303.19394975212	286.966900770315	233.871934484726	279.671443253742	-0.25637755552774	0.0125189155452225	0.167587215750503	2310033P09Rik	11	59099147	59101564	+	1285	protein_coding	RIKEN cDNA 2310033P09 gene [Source:MGI Symbol;Acc:MGI:1915112]	-	267	265	172	260	220	222	282	279	267	278	324	270	6.81296294362074	6.10987054680981	5.62755405707513	7.37227602791604	6.0795986490811	6.26833640280536	7.46390601591947	7.32886473217404	7.9475320688684	7.21486122265371	8.27367764356554
ENSMUSG00000003469	7.40604569343417	34.4152672144098	48.9616542280864	18.6530009472641	31.8783559382641	33.9233251323204	48.3446631315042	14.3405517295043	30.9710094864254	155.341488048176	99.1930823263109	77.5873472453073	29.2062748589632	70.9630236612046	-1.28474322210902	0.012529973403732	0.167587215750503	Phyhip	14	70694916	70706272	+	2910	protein_coding	phytanoyl-CoA hydroxylase interacting protein [Source:MGI Symbol;Acc:MGI:1860417]	-	8	39	41	18	32	33	50	15	29	164	106	73	0.0901415229164849	0.397064335671884	0.592359317304011	0.225377669211866	0.390492184395837	0.411456000063406	0.584382493142777	0.173993851029887	0.38117917364426	1.87947768061267	1.1952798267257
ENSMUSG00000030125	17.5893585219062	21.1786259780983	14.3302402618789	10.3627783040356	36.8593490536179	14.3917136924996	20.3047585152318	39.1975080606452	36.3108387082229	28.4161258624712	42.1102707989056	45.7021360486056	19.1186776353394	35.3402729990137	-0.879963142368286	0.0125698531873076	0.167587215750503	Lrrc23	6	124746826	124756690	-	1734	protein_coding	leucine rich repeat containing 23 [Source:MGI Symbol;Acc:MGI:1315192]	-	19	24	12	10	37	14	21	41	34	30	45	43	0.359279469582789	0.410063780252039	0.290955458410781	0.210127200245588	0.757718668791447	0.292941830809534	0.411898663851847	0.798124043305489	0.749987420760512	0.576976965417217	0.851569570356091
ENSMUSG00000026482	1951.49304021991	1267.18778768955	1905.9219548299	1877.73542869125	2192.63316937873	2045.67930343387	2150.37061608931	2323.1693801797	2021.65934337253	2737.42012475139	2597.73581639471	2336.123140345	1873.4417807072	2361.07973685544	-0.334041295990075	0.0126198051972285	0.167963856103096	Rgl1	1	152392511	152642102	-	6907	protein_coding	ral guanine nucleotide dissociation stimulator,-like 1 [Source:MGI Symbol;Acc:MGI:107484]	-	2108	1436	1596	1812	2201	1990	2224	2430	1893	2890	2776	2198	10.0071185246151	6.15962462211225	9.7148877558435	9.55872801779703	11.3158177245853	10.4536046030034	10.9512957707287	11.8755148765758	10.4829934215263	13.9538708928946	13.1882362780205
ENSMUSG00000073147	197.185966587685	207.374046035546	193.458243535366	154.40539673013	191.270135629585	222.043582684279	283.299725950615	269.602372514682	249.904007580122	202.701697818961	239.560651655996	217.882276510794	194.289561867099	243.825122005195	-0.327182415413262	0.0127052551268452	0.16863816594956	5031425E22Rik	5	23587297	23639396	-	6968	lncRNA	RIKEN cDNA 5031425E22 gene [Source:MGI Symbol;Acc:MGI:1923227]	-	213	235	162	149	192	216	293	282	234	214	256	205	1.00230374837336	0.999192079356244	0.977465029554817	0.779129222426115	0.978472092358111	1.12472942716424	1.43014364273343	1.3660814584017	1.28449338107864	1.02421691742805	1.20555918662888
ENSMUSG00000118563	0	0	1.19418668848991	1.03627783040356	0	0	9.66893262630085	5.73622069180174	1.0679658443595	0.947204195415705	0	7.43988261256371	0.371744086482245	4.14336766174025	-3.52208097135659	0.0127447953162989	1	Gm53031	2	25006293	25066211	+	1981	unitary_pseudogene	predicted gene, 53031 [Source:MGI Symbol;Acc:MGI:6388924]	-	0	0	1	1	0	0	10	6	1	1	0	7	0	0	0.0212231518123967	0.0183927594763175	0	0	0.171686325597727	0.10223566007006	0.0193081062386603	0.0168345626456916	0
ENSMUSG00000032192	793.372644909136	525.053435707021	831.153935188978	920.214713398361	734.198385203145	1195.54021602693	1022.0061786	1047.81631303578	1051.9463566941	1184.95244846505	1117.32585186429	1198.88394099598	833.255555072262	1103.82184827587	-0.406137470717274	0.0127552375416797	0.16863816594956	Gnb5	9	75213570	75253158	+	3115	protein_coding	guanine nucleotide binding protein (G protein), beta 5 [Source:MGI Symbol;Acc:MGI:101848]	-	857	595	696	888	737	1163	1057	1096	985	1251	1194	1128	9.0209165231033	5.65911054038839	9.39389160940258	10.3869079268236	8.40165402395887	13.5464067775143	11.5408319690727	11.8764907163334	12.0949014709163	13.3932375666116	12.5777508984267
ENSMUSG00000044288	285.132759197216	105.010687141404	217.341977305164	227.981122688783	209.201710844858	227.1834804316	322.942349718448	351.82153576384	293.690607198861	306.894159314689	262.019462748746	256.144529946836	211.975289601504	298.918774115237	-0.496912738965822	0.012762237473552	0.16863816594956	Cnr1	4	33924593	33948831	+	6444	protein_coding	cannabinoid receptor 1 (brain) [Source:MGI Symbol;Acc:MGI:104615]	-	308	119	182	220	210	221	334	368	275	324	280	241	1.56719514586412	0.547117608110175	1.18743600259856	1.2439373735209	1.15722849687838	1.24434036924542	1.76283277586962	1.92764882258313	1.63230502423435	1.67677886821249	1.4258019787547
ENSMUSG00000042642	860.027056150044	771.254962702414	751.143427060154	861.146877065358	766.07674114141	828.55151686819	998.800740296878	1031.56368774235	815.925905090655	863.850226219123	1062.11460792795	904.477157613102	806.366763497928	946.122054148343	-0.230802054212741	0.0127711580661118	0.16863816594956	Flad1	3	89308311	89319177	-	4087	protein_coding	flavin adenine dinucleotide synthetase 1 [Source:MGI Symbol;Acc:MGI:2443030]	-	929	874	629	831	769	806	1033	1079	764	912	1135	851	7.4531346842793	6.33572118905931	6.4705375807891	7.40845680701448	6.68154747766669	7.15538247591191	8.59638515224851	8.9115333644928	7.15011251835395	7.44177464257818	9.11271813458456
ENSMUSG00000027075	473.986924379787	243.554198748131	348.702513039054	519.175193032184	527.985270227499	560.248854458019	786.084222518259	803.070896852243	524.371229580512	574.952946617333	576.442818047241	537.797228851034	445.608825647446	633.78655707777	-0.508583494913612	0.0127937114389104	0.16863816594956	Slc43a1	2	84669194	84693938	+	5716	protein_coding	solute carrier family 43, member 1 [Source:MGI Symbol;Acc:MGI:1931352]	-	512	276	292	501	530	545	813	840	491	607	616	506	2.93701141147063	1.43056015430474	2.14775623026321	3.19357318366254	3.29260024489208	3.45944739540555	4.837472476389	4.96046850311937	3.28559044843667	3.54146361806804	3.53626828068749
ENSMUSG00000002227	685.98498235434	542.70229068877	533.80144975499	527.465415675412	738.183179695429	569.500670403198	722.269267184673	684.522335888341	663.206789347247	717.033575929689	826.29709145408	773.747791706626	599.60633142869	731.179475251776	-0.285761164264444	0.0128103361154998	0.16863816594956	Mov10	3	104702152	104725879	-	5607	protein_coding	Mov10 RISC complex RNA helicase [Source:MGI Symbol;Acc:MGI:97054]	-	741	615	447	509	741	554	747	716	621	757	883	728	4.33326795256032	3.2496293019037	3.35174772461922	3.30764272694771	4.69291846204849	3.58493806952467	4.53116865389326	4.31040518699044	4.23628528676764	4.50247838969933	5.1675758623259
ENSMUSG00000050248	531.383778503902	406.806107329306	493.199102346333	526.429137845009	562.852222034976	598.284097788197	643.950912911637	633.852386444092	619.420189728507	693.353471044296	669.085413804833	528.231665492023	519.82574097462	631.315673237565	-0.281248268247001	0.0128515992593125	0.16863816594956	Evc2	5	37495843	37582399	+	5837	protein_coding	EvC ciliary complex subunit 2 [Source:MGI Symbol;Acc:MGI:1915775]	-	574	461	413	508	565	582	666	663	580	732	715	497	3.2244087585301	2.33991722542397	2.97477905169912	3.17106676605674	3.43727366891391	3.61772657616451	3.8806521660452	3.83406494897483	3.80069006443309	4.1822279623122	4.01950952362585
ENSMUSG00000041697	5413.81940190038	4232.19542462332	4258.46973115502	5352.37499403439	4883.36565029283	6362.16543163428	6810.79614196632	6459.94053575072	6581.87349878757	5548.7221767452	6103.18191445472	5660.68782778776	5083.73177227337	6194.20034924872	-0.285011346279369	0.0128831466983773	0.168855400291433	Cox6a1	5	115483701	115487040	-	702	protein_coding	cytochrome c oxidase subunit 6A1 [Source:MGI Symbol;Acc:MGI:103099]	-	5848	4796	3566	5165	4902	6189	7044	6757	6163	5858	6522	5326	273.148075446119	202.409701650875	213.569181336348	268.080102477424	247.965666035142	319.87906615652	341.273382328786	324.902039278255	335.7988549594	278.290620320986	304.859965288175
ENSMUSG00000038722	763.748462135399	671.538932055535	700.987586143578	711.922869487246	701.323830641811	772.012641647656	818.958593447682	882.421949755501	744.372193518568	821.226037425417	789.801523428362	874.717627162848	720.255720351871	821.91632078973	-0.190592117463186	0.0129065045362521	0.16901842954031	Bud31	5	145077172	145084888	+	1609	protein_coding	BUD31 homolog [Source:MGI Symbol;Acc:MGI:2141291]	-	825	761	587	687	704	751	847	923	697	867	844	823	16.8122483795642	14.0125725803373	15.3382712340522	15.5572223934219	15.5371719359984	16.9350444864788	17.9038960549848	19.3633853033646	16.5691751682871	17.9700533730061	17.2124668177316
ENSMUSG00000071347	1065.54482414284	449.163359285502	806.07601473069	869.437099708587	1076.89071153948	1245.91121395068	1392.32629818732	1319.3307591144	1410.78288039889	998.353221968153	1360.62963870242	1309.41933981121	918.837203892964	1298.47368969707	-0.49903963141606	0.0129380238752029	0.169107388173987	C1qtnf9	14	61005583	61018318	+	1903	protein_coding	C1q and tumor necrosis factor related protein 9 [Source:MGI Symbol;Acc:MGI:3045252]	-	1151	509	675	839	1081	1212	1440	1380	1321	1054	1454	1232	19.831904773496	7.92443406973926	14.9128050576676	16.0640312256694	20.1716889348369	23.1082086616606	25.7361681478244	24.4779998937053	26.5514464130617	18.4709033660407	25.0716162467018
ENSMUSG00000026887	639.697196770377	625.651909102988	687.851532570189	657.000144475857	760.099549402985	717.52972552605	814.124127134532	829.839926747318	706.993388965986	750.185722769239	795.41622620155	809.884364396221	681.305009641408	784.407292702474	-0.204099490720607	0.0129435993029728	0.169107388173987	Mrrf	2	36026401	36080659	+	4971	protein_coding	mitochondrial ribosome recycling factor [Source:MGI Symbol;Acc:MGI:1915121]	-	691	709	576	634	763	698	842	868	662	792	850	762	4.55787255320099	4.2256326009567	4.8716163175309	4.64704482706073	5.45049733315486	5.09464712428319	5.76087576885253	5.89401982752458	5.09375886133905	5.31334152727483	5.61089156998521
ENSMUSG00000030124	114.79370824823	67.0656489306447	75.2337613748644	177.203508999009	141.460204476047	143.917136924996	186.610399687606	192.163393175358	184.758091074193	143.975037703187	250.790057202371	142.420610011934	119.945661492298	183.452931475775	-0.61360991488952	0.0129600089406739	0.169146693417109	Lag3	6	124881324	124888668	-	2109	protein_coding	lymphocyte-activation gene 3 [Source:MGI Symbol;Acc:MGI:106588]	-	124	76	63	171	142	140	193	201	173	152	268	134	1.92784892894644	1.06764353597153	1.25590944316858	2.95427485318257	2.39093143130702	2.40854023055349	3.11243944640852	3.21702997963936	3.13757184133238	2.40355089017046	4.1697971464024
ENSMUSG00000002059	1665.43452531101	1104.81832185746	1503.4810408088	2068.41054948551	1611.84937212848	2036.42748748869	1982.13118839167	2349.93841007478	2029.13510428304	2004.28407749963	2331.03743466831	2094.8583756233	1665.07021617999	2131.89743175679	-0.356765263767153	0.0129983347307169	0.169401928191777	Rab34	11	78079256	78083019	+	2385	protein_coding	RAB34, member RAS oncogene family [Source:MGI Symbol;Acc:MGI:104606]	-	1799	1252	1259	1996	1618	1981	2050	2458	1900	2116	2491	1971	24.7326512161877	15.5526789812405	22.1938017815977	30.4932364021299	24.0904820645397	30.13689750493	29.2338261035072	34.7879731032719	30.4711870321566	29.587862624721	34.2722058493238
ENSMUSG00000032135	11284.9621253703	5373.19389919336	9011.33275134487	10644.6458739054	10146.2829759756	11542.1543813847	11460.5858419544	12965.7708370359	12744.0364207419	12413.1109809228	13678.3517392801	13027.2344545991	9667.09533452904	12714.848379089	-0.395383973484449	0.0130333614074144	0.169401928191777	Mcam	9	44045766	44054024	+	3350	protein_coding	melanoma cell adhesion molecule [Source:MGI Symbol;Acc:MGI:1933966]	-	12190	6089	7546	10272	10185	11228	11853	13562	11933	13105	14617	12257	119.312732397917	53.8505854812611	94.7035698461911	111.72273808955	107.962164490563	121.607411930816	120.338240963905	136.651550414167	136.247640145879	130.460347766452	143.175976376503
ENSMUSG00000023156	608.221502573282	542.70229068877	615.006144572304	594.823474651644	524.996674358287	550.997038512841	687.46110972999	669.22574737687	669.614584413404	666.831753572657	641.011899938896	597.316289751544	572.791187559521	655.24356413056	-0.195029742648892	0.01304662719958	0.169401928191777	Rpp14	14	14377939	14389406	-	2401	protein_coding	ribonuclease P 14 subunit [Source:MGI Symbol;Acc:MGI:1914303]	-	657	615	515	574	527	536	711	700	627	704	685	562	8.97224455530716	7.58878446304625	9.01798326792348	8.71066074300867	7.79424067086532	8.09981460576903	10.0715803593281	9.84105163259417	9.98848302942894	9.7783777989109	9.3617087322251
ENSMUSG00000015312	274.949446368744	247.966412493568	267.49781822174	186.530009472641	249.049655767688	203.539950793923	344.21400149631	256.217857567144	307.574163175535	377.934473970866	338.753733982307	238.076243602039	238.255548853051	310.461745632367	-0.382408427739235	0.0130561729008844	0.169401928191777	Gadd45b	10	80765907	80768038	+	1589	protein_coding	growth arrest and DNA-damage-inducible 45 beta [Source:MGI Symbol;Acc:MGI:107776]	-	297	281	224	180	250	198	356	268	288	399	362	224	6.12858826392624	5.23928092046694	5.92677550524868	4.12743245693223	5.58690733456521	4.52109613663125	7.6198475468369	5.69307004578091	6.93254577478313	8.37404541966328	7.47551964015217
ENSMUSG00000087611	69.4316783759454	48.5343511998087	72.8453879978846	79.7933929410741	21.9163697075566	71.9585684624979	74.4507812225165	94.6476414147287	88.6411650818381	71.9875188515936	159.08324524031	126.478004413583	60.7466247807945	102.548059370762	-0.757476227127166	0.0130747113553677	0.169500382805475	4930458D05Rik	5	100988663	100995033	-	3337	lncRNA	RIKEN cDNA 4930458D05 gene [Source:MGI Symbol;Acc:MGI:1923052]	-	75	55	61	77	22	70	77	99	83	76	170	119	0.736941391089407	0.488310142875799	0.768542669512085	0.840748082780656	0.234111005815679	0.761104486999897	0.784792239967049	1.00141621302967	0.951362526844245	0.7595278434776	1.67166568740764
ENSMUSG00000027314	904.463330310649	433.279389801928	542.16075657442	775.135817141863	894.586363517537	1055.73499729979	1195.08007261079	1192.17786711279	963.305191612265	746.396905987576	1414.90509884323	1160.62168755994	767.560109107698	1112.08113728776	-0.534910039308565	0.0131136962120237	0.169500429257907	Dll4	2	119156265	119166443	+	3852	protein_coding	delta like canonical Notch ligand 4 [Source:MGI Symbol;Acc:MGI:1859388]	-	977	491	454	748	898	1027	1236	1247	902	788	1512	1092	8.31641548410471	3.77645640926688	4.95523129234747	7.07532977126002	8.27838108790493	9.67356633397441	10.9132065214757	10.9273739494933	8.95662547503247	6.82222836388337	12.8801887164888
ENSMUSG00000000440	4024.26007866979	3105.31603403867	3292.37270016669	3961.69014563281	3430.90805785568	3697.64243942293	3704.16808913586	4651.11894426924	4036.91089167889	3992.4656836772	4330.80740571856	4636.10970800041	3585.36490929776	4225.26345374669	-0.236882079248027	0.013118516328637	0.169500429257907	Pparg	6	115337912	115467360	+	2953	protein_coding	peroxisome proliferator activated receptor gamma [Source:MGI Symbol;Acc:MGI:97747]	THR-like	4347	3519	2757	3823	3444	3597	3831	4865	3780	4215	4628	4362	48.2674200958035	35.3057207875298	39.2525319106558	47.1706888201296	41.4147508011181	44.1956412665464	44.1233914925787	55.6102731258101	48.961251261162	47.6014788871318	51.4264584171897
ENSMUSG00000029575	810.962003431042	759.783206964278	878.921402728575	996.899272848225	781.019720487471	879.950494341403	1011.37035271107	1069.80515902102	988.936371876893	883.741514322853	1031.23374267542	983.127345231633	851.256016800166	994.702414306482	-0.225407632588427	0.0131911177728383	0.169922112151905	Mmab	5	114569095	114582121	-	3670	protein_coding	methylmalonic aciduria (cobalamin deficiency) cblB type homolog (human) [Source:MGI Symbol;Acc:MGI:1924947]	-	876	861	736	962	784	856	1046	1119	926	933	1102	925	7.82647018248592	6.95066487577212	8.43152449942871	9.5508137260836	7.58586928787499	8.46272345733582	9.6936157797143	10.2919970421455	9.65092804709426	8.47816555990203	9.85308532707964
ENSMUSG00000086495	1.85151142335854	3.52977099634972	5.97093344244956	2.07255566080712	3.98479449228301	3.08393864839277	3.86757305052034	5.73622069180174	14.9515218210329	11.3664503449885	7.48627036424988	12.7540844786806	3.41558411060679	9.36035345854567	-1.46567015307372	0.0131941324727304	1	Gm13778	2	90874437	90884278	-	670	lncRNA	predicted gene 13778 [Source:MGI Symbol;Acc:MGI:3649233]	-	2	4	5	2	4	3	4	6	14	12	8	12	0.0978775491369295	0.176878257451999	0.313754207017596	0.108764347828612	0.212002286677591	0.162460917257057	0.203051111050207	0.302281854625057	0.799240326004486	0.597300333154301	0.391806735654384
ENSMUSG00000009905	1038.69790850414	936.271756781764	948.18423066099	963.738382275311	970.297458870914	1086.57438378372	1201.8483254492	1304.03417060293	981.460610966376	1148.01148484383	1252.07871842079	1059.65185210372	990.627353479473	1157.84752706447	-0.225435939366208	0.0132943273070477	0.17063258075107	Kdsr	1	106648189	106687457	-	8147	protein_coding	3-ketodihydrosphingosine reductase [Source:MGI Symbol;Acc:MGI:1918000]	-	1122	1061	794	930	974	1057	1243	1364	919	1212	1338	997	4.51567870309288	3.85839716689894	4.09748282924317	4.15926507499743	4.24538027003996	4.70738500848063	5.18911856492337	5.65135103524297	4.3146140203295	4.961251202228	5.38908595563903
ENSMUSG00000021241	706.351608011284	551.526718179644	536.18982313197	753.373982703388	641.551913257565	787.43233488962	898.243840983349	975.157517606296	755.051851962163	739.766476619666	763.599577153488	812.010045142668	662.737730028912	823.971551577938	-0.314075595204959	0.0133195369941117	0.170697599174796	Isca2	12	84820025	84821862	+	1838	protein_coding	iron-sulfur cluster assembly 2 [Source:MGI Symbol;Acc:MGI:1921566]	-	763	625	449	727	644	766	929	1020	707	781	816	764	13.6115293510037	10.0745062986976	10.270585211872	14.4118678410878	12.4421581414101	15.1211809856124	17.1905744084576	18.7322650934679	14.7128925083579	14.1707175067851	14.5680480493039
ENSMUSG00000035863	2976.30461304886	1591.04427660464	2147.14766590486	2924.37603739885	2884.9912124129	3275.14284459312	3877.24198314664	3834.66353246946	2726.51680064979	2960.96031486949	4650.84546379024	3556.26388880545	2633.16777499387	3601.08199728851	-0.451697729867256	0.0133214484012632	0.170697599174796	Palm	10	79629406	79656730	+	5655	protein_coding	paralemmin [Source:MGI Symbol;Acc:MGI:1261814]	-	3215	1803	1798	2822	2896	3186	4010	4011	2553	3126	4970	3346	18.6413028044565	9.44609654220112	13.367538214883	18.182590894206	18.1853349640258	20.4416341405988	24.1174809928643	23.9417385105729	17.2680127577862	18.4349803089453	28.8390196519791
ENSMUSG00000006299	2523.6100700377	2339.35572783078	2192.52676006748	2634.21824488585	2397.8500857313	3017.11997767759	3232.32417697237	3178.82230004013	2921.95455016758	2659.7493807273	2805.47981900264	2956.82191830746	2517.44681103845	2959.19202420292	-0.23316325482346	0.0133691858601247	0.171021254428647	Aamp	1	74318999	74323897	-	3458	protein_coding	angio-associated migratory protein [Source:MGI Symbol;Acc:MGI:107809]	-	2726	2651	1836	2542	2407	2935	3343	3325	2736	2808	2998	2782	25.8481077638332	22.7129738677355	22.3224595220639	26.7844001389275	24.7176090010182	30.7953798669886	32.8799818566631	32.4565452882673	30.2632286706879	27.0806090896273	28.4487607590925
ENSMUSG00000001911	4187.19308392535	3796.26870657413	6191.85797982019	4105.73276405891	3878.20123961444	4029.67983389988	5487.11926542573	5311.74036060841	5205.26552540818	5497.57315019275	6146.22796904915	4917.76240690461	4364.82226798215	5427.61477959814	-0.314653997031063	0.0133894630677079	0.171021254428647	Nfix	8	85426505	85526973	-	7351	protein_coding	nuclear factor I/X [Source:MGI Symbol;Acc:MGI:97311]	CTF/NFI	4523	4302	5185	3962	3893	3920	5675	5556	4874	5804	6568	4627	20.1747451829712	17.3385687860221	29.6549157249021	19.6380976659614	18.8058660170054	19.3482679492103	26.2566687182237	25.5124075971266	25.3608180013772	26.3309964577435	29.3186139411519
ENSMUSG00000070493	7482.88341750355	5738.52519731556	7826.69955636288	7818.71623039486	6678.51556906633	8534.28621965225	9530.66688974475	9395.92949317125	9902.17930890124	7733.92225556923	8481.00853889958	8216.81892539001	7346.60436504924	8876.75423527934	-0.273025007333063	0.013428485223778	0.17107779652581	Chchd2	5	129909997	129916311	-	2269	protein_coding	coiled-coil-helix-coiled-coil-helix domain containing 2 [Source:MGI Symbol;Acc:MGI:1261428]	-	8083	6503	6554	7545	6704	8302	9857	9828	9272	8165	9063	7731	116.806221657436	84.9118925188336	121.441269173339	121.159121402778	104.91917485941	132.754937343267	147.751004526957	146.206365877838	156.30147713965	120.007394503352	131.067253102022
ENSMUSG00000062352	1209.96271516481	683.893130542759	1183.4390082935	1161.66744788239	1048.9971500935	1346.65320979817	1402.96212407625	1413.02236374716	1440.68592404096	1430.27833507771	1305.41839476607	1452.90279019637	1105.76877696252	1407.54498865076	-0.348538651648925	0.0134820493195874	0.171618948534451	Itgb1bp1	12	21290826	21336285	-	3537	protein_coding	integrin beta 1 binding protein 1 [Source:MGI Symbol;Acc:MGI:1306802]	-	1307	775	991	1121	1053	1310	1451	1478	1349	1510	1395	1367	12.1162554429909	6.49166208523823	11.7796653001681	11.5478708967537	10.5717934177203	13.4381252545961	13.9525161598586	14.1050621694943	14.5881777101788	14.2373185150364	12.9418350819681
ENSMUSG00000013150	216.62683653295	160.604580333912	253.167577959861	198.965343437484	170.349964545099	199.428032596066	293.935551839546	247.613526529442	217.865032249337	250.061907589746	239.560651655996	265.710093305847	199.857055900895	252.457793861652	-0.34024578149567	0.0135264410901702	0.171655261001489	Gfod2	8	106440486	106485296	-	4608	protein_coding	glucose-fructose oxidoreductase domain containing 2 [Source:MGI Symbol;Acc:MGI:1917825]	-	234	182	212	192	171	194	304	259	204	264	256	250	1.66506533785675	1.17016789896358	1.93427289777688	1.51816902177438	1.31776811982702	1.52753689417479	2.24378528096279	1.89724284697215	1.69333097343584	1.91063518027222	1.82298967283637
ENSMUSG00000063235	496.20506146009	341.505343896836	507.529342608212	503.63102557613	479.171537697033	583.892384095697	681.65975015421	609.951466894918	578.837487642847	554.114454318188	628.84671059699	561.179717061948	485.322449222333	602.431597778183	-0.313079811865344	0.0136559880345827	0.172575056768974	Ptpmt1	2	90739060	90748389	-	3471	protein_coding	protein tyrosine phosphatase, mitochondrial 1 [Source:MGI Symbol;Acc:MGI:1913711]	-	536	387	425	486	481	568	705	638	542	585	672	528	5.06335140392597	3.30328171814526	5.14788305665574	5.10167774992115	4.92091450069052	5.93739812458903	6.90803747511994	6.2044272341317	5.97267423931492	5.62066324737896	6.35289054526902
ENSMUSG00000051652	374.931063230105	232.082443009994	303.323418876437	396.894409044564	418.403421689717	439.975247170701	517.287895507096	567.885848488372	535.050888024107	388.353720120439	474.442384334336	406.005022571334	360.935000503586	481.504293174281	-0.416116416580318	0.0136909470710188	0.172575056768974	Lrrc3	10	77733409	77738370	-	4296	protein_coding	leucine rich repeat containing 3 [Source:MGI Symbol;Acc:MGI:2447899]	-	405	263	254	383	420	428	535	594	501	410	507	382	3.09113977633913	1.81376383528961	2.4857863570882	3.24837282312618	3.47168549063513	3.6147806201609	4.23554881028553	4.66721494815643	4.46064445713497	3.18277470355149	3.87258001729626
ENSMUSG00000054723	370.302284671709	622.122138106639	373.780433497342	488.086858120077	431.354003789636	510.905836083735	605.275182406433	559.28151745067	539.322751401545	626.101973169781	656.920224462927	559.054036315502	466.091925711523	590.992614201143	-0.341729694028627	0.0137023291496048	0.172577992601085	Vmac	17	57020936	57025022	-	2464	protein_coding	vimentin-type intermediate filament associated coiled-coil protein [Source:MGI Symbol;Acc:MGI:2146912]	-	400	705	313	471	433	497	626	585	505	661	702	526	5.32288619494665	8.47691202388918	5.34069762610877	6.96484684339998	6.2402580547926	7.31843355484678	8.64079717904604	8.01402684796341	7.83925569061972	8.94637440963357	9.34874087092549
ENSMUSG00000062309	27.7726713503782	50.2992366979835	44.1849074741267	26.9432235904926	62.7605132534575	43.1751410774987	84.1197138488174	54.4940965721165	54.4662580623343	93.7732153461548	90.7710281665298	41.4507745557121	42.5226155739895	69.8458477586108	-0.717986134538598	0.0137341107125905	0.172837642048934	Rpp25	9	57411309	57412731	+	1423	protein_coding	ribonuclease P/MRP 25 subunit [Source:MGI Symbol;Acc:MGI:2143151]	-	30	57	37	26	63	42	87	57	51	99	97	39	0.691264489688082	1.1867499388777	1.09317874799244	0.665732585795651	1.5721392341288	1.07089487271342	2.07938321558618	1.35208995410294	1.37084840576113	2.32015291040787	2.23678142570085
ENSMUSG00000042737	287.910026332254	358.271756129497	300.935045499458	301.556848647436	202.228320483363	322.785578531776	382.889732001514	369.030197839245	453.885483852786	345.729531326732	353.726274710807	352.863003910164	295.614595937297	376.354037273541	-0.347526223830732	0.0138612616011865	0.173508044063661	Dpm3	3	89166665	89174386	+	919	protein_coding	dolichyl-phosphate mannosyltransferase polypeptide 3 [Source:MGI Symbol;Acc:MGI:1915813]	-	311	406	252	291	203	314	396	386	425	365	378	332	11.0961615417095	13.0887985832679	11.5286747144398	11.5374237737456	7.84396926306287	12.3969995547841	14.6554735538196	14.1777535805463	17.6887675135844	13.2453569525648	13.4968680456786
ENSMUSG00000039257	62.9513883941905	30.8854962180601	80.0105081288241	95.3375603971275	96.6312664378631	89.4342208033902	141.166416343992	139.581370167176	99.3208235254331	81.4595608057507	131.009731374373	117.975281427796	75.8750733965759	118.418863940753	-0.645879073741274	0.0139209332807797	0.173810249013041	Vstm2b	7	40547752	40580018	+	2747	protein_coding	V-set and transmembrane domain containing 2B [Source:MGI Symbol;Acc:MGI:1914525]	-	68	35	67	92	97	87	146	146	93	86	140	111	0.811667480647708	0.377484086025608	1.02544057903312	1.2202829268576	1.25391596388575	1.14911380498894	1.80765013495916	1.79403051931944	1.29493641669716	1.04406155795264	1.67234582291506
[truncated: 678 more rows]
[truncated: 1 more columns]
