# Supplementary material for: Loss of CTRP10 results in female obesity with preserved metabolic health
Source: eLife. 2025 Mar 24;13:RP93373. doi: 10.7554/eLife.93373 (PMC11932693; doi:10.7554/eLife.93373)
Supplement: Figure 8—source data 3. [file elife-93373-fig8-data3.xls]

gene_id	KO_iWAT1	KO_iWAT2	KO_iWAT3	KO_iWAT4	KO_iWAT5	KO_iWAT6	WT_iWAT1	WT_iWAT2	WT_iWAT3	WT_iWAT4	WT_iWAT5	WT_iWAT6	KO_iWAT	WT_iWAT	log2FoldChange	pvalue	padj	gene_name	gene_chr	gene_start	gene_end	gene_strand	gene_length	gene_biotype	gene_description	tf_family	KO_iWAT1_count	KO_iWAT2_count	KO_iWAT3_count	KO_iWAT4_count	KO_iWAT5_count	KO_iWAT6_count	WT_iWAT1_count	WT_iWAT2_count	WT_iWAT3_count	WT_iWAT4_count	WT_iWAT5_count	WT_iWAT6_count	KO_iWAT1_fpkm	KO_iWAT2_fpkm	KO_iWAT3_fpkm	KO_iWAT4_fpkm	KO_iWAT5_fpkm	KO_iWAT6_fpkm	WT_iWAT1_fpkm	WT_iWAT2_fpkm	WT_iWAT3_fpkm	WT_iWAT4_fpkm	WT_iWAT5_fpkm
ENSMUSG00000044083	226.771317202615	331.490300422034	175.776259247142	226.27800042362	236.857602460346	128.163705333621	49.183814675775	76.7455407513067	66.6227842383737	85.5761389838184	103.33241805161	93.0799144823558	220.88953084823	79.0901018638732	1.47951423725989	2.06874999358399e-10	1.70433968221417e-06	Efcab8	2	153621851	153686671	+	5693	protein_coding	EF-hand calcium binding domain 8 [Source:MGI Symbol;Acc:MGI:3644206]	-	219	301	191	215	174	111	49	80	77	102	116	107	1.5506509721873	2.33812474146627	1.22716173239872	1.56371502910353	1.59770905862996	0.886680564373715	0.33355532299058	0.529979307362767	0.461832193533666	0.586273077721736	0.70606453756124
ENSMUSG00000002341	509.458849605875	361.225310758894	164.732724634756	440.978986872079	187.852581261654	184.740476156571	78.2926029532745	88.2573718640027	119.401873050592	72.1524309079253	64.1373629285854	33.9263239702045	308.164821548305	76.0279942790973	2.01993747507309	3.13969264907438e-10	1.72442385929328e-06	Ncan	8	70545735	70573523	-	7195	protein_coding	neurocan [Source:MGI Symbol;Acc:MGI:104694]	-	492	328	179	419	138	160	78	92	138	86	72	39	2.75642023377082	2.01597624884341	0.909980012236336	2.4112573187631	1.00262359602189	1.01128735855947	0.420123315213964	0.482244340005374	0.654912003347614	0.391118732107546	0.34676023781865
ENSMUSG00000056380	113.903401334647	77.090767540008	13.8044182654824	27.3638512140192	46.2825200209872	68.1230505827355	4.0150052796551	7.67455407513067	12.9784644620208	7.55083579268986	0.890796707341463	4.34952871412878	57.7613348263132	6.24319750516112	3.20450087493029	2.21115453767818e-09	9.10829832933085e-06	Gpr50	X	70707273	70712863	+	3069	protein_coding	G-protein-coupled receptor 50 [Source:MGI Symbol;Acc:MGI:1333877]	-	110	70	15	26	34	59	4	8	15	9	1	5	1.44479730031625	1.00865702434453	0.178773849179498	0.35078159112179	0.579124131201769	0.874259816196825	0.0505098504142245	0.0983112478597665	0.166889507419428	0.0959591924406257	0.0112909557542503
ENSMUSG00000028763	43688.1673246371	39253.5175346929	37201.9869309239	40781.6104112319	41040.344003316	46507.2602444407	30361.4699247519	23511.9557284222	28026.561390252	29821.6064723512	28945.5482083535	31616.7242230021	41412.1477415404	28713.9776578555	0.528284264860735	4.83464034911382e-09	1.28583470011448e-05	Hspg2	4	137196080	137297941	+	14739	protein_coding	perlecan (heparan sulfate proteoglycan 2) [Source:MGI Symbol;Acc:MGI:96257]	-	42191	35643	40424	38749	30149	40279	30248	24509	32392	35545	32494	36345	115.388605525764	106.942072786609	100.318466965932	108.856110941842	106.92875887818	124.27851494904	79.5319489264218	62.7144594034272	75.0420011885436	78.9135285906775	76.3946158259757
ENSMUSG00000038244	1349.23756308223	1077.06815220183	1117.23758495304	1162.96367659582	1012.77043810631	1111.90674086736	852.184870606795	691.669186021152	804.664796645293	826.397028422168	760.74038806961	751.598561801452	1138.53069263443	781.209138594412	0.544044628152739	5.25654304037545e-09	1.28583470011448e-05	Mical2	7	111825063	112012313	+	15218	protein_coding	microtubule associated monooxygenase, calponin and LIM domain containing 2 [Source:MGI Symbol;Acc:MGI:2444947]	-	1303	978	1214	1105	744	963	849	721	930	985	854	864	3.45142118652299	2.84199716758695	2.91790217269945	3.00652647417485	2.55567125857483	2.87775688357393	2.16203684045449	1.78684875961403	2.08670007180668	2.11796907300037	1.94458926936288
ENSMUSG00000093812	684.45589347456	639.853370582066	519.046126782137	787.236950311014	521.358975530532	602.715803460812	287.07287749534	253.260284479312	427.424096282553	333.91473838784	288.618133178634	167.021902622545	625.777853356853	292.885338741037	1.09522529636651	1.11494327222908e-08	2.29636503706482e-05	Gm5627	9	102616847	102633884	+	931	lncRNA	predicted gene 5627 [Source:MGI Symbol;Acc:MGI:3645308]	-	661	581	564	748	383	522	286	264	494	398	324	192	28.6195567483375	27.5974412288088	22.1584329342199	33.2668937436287	21.5049643067575	25.4980058297803	11.9049981319761	10.6945953270608	18.1180698707835	13.9886033079021	12.0593228785965
ENSMUSG00000042429	2854.83343163292	3795.06835632668	2861.19575915898	3226.82953162242	2560.51235763167	3193.70098155672	1930.21378819419	2248.64434401329	2278.15312856673	2065.57308017805	1995.38462444488	2110.39133209528	3082.02340298823	2104.72671624874	0.550336520538271	7.47367490946698e-08	0.000136826379425875	Adora1	1	134126961	134163169	-	5785	protein_coding	adenosine A1 receptor [Source:MGI Symbol;Acc:MGI:99401]	-	2757	3446	3109	3066	1881	2766	1923	2344	2633	2462	2240	2426	19.210759166727	26.342335431486	19.6574409241949	21.9446733851899	16.9971092289192	21.7437380067143	12.8821662731881	15.2814425871591	15.5411144240335	13.9259762039737	13.4175199291165
ENSMUSG00000040111	565.37506480652	744.476555100648	577.944978048195	1120.86544395886	800.415346245308	722.797112962583	360.346723849045	258.056880776269	500.10349726987	440.465421240242	350.083105985195	368.84003495812	755.312416853686	379.649277346457	0.99157156462798	1.54257104770848e-07	0.000254169431530926	Gramd1b	9	40204529	40442679	-	10452	protein_coding	GRAM domain containing 1B [Source:MGI Symbol;Acc:MGI:1925037]	-	546	676	628	1065	588	626	359	269	578	525	393	424	2.10573815486391	2.86015560058805	2.19770736246218	4.21900986508914	2.94081400601922	2.72370661898857	1.33109185803508	0.970650737829562	1.88826567929704	1.64361791300067	1.30292897832464
ENSMUSG00000038007	1553.22820001791	1644.23594196046	1697.94344665433	2150.16723193235	1566.7994277693	1778.12708300699	885.30866416395	807.746816407503	1287.46367463247	1000.06625165403	810.625003680732	1303.11880275298	1731.75022189022	1015.72153554861	0.769532911695783	2.00936579158709e-07	0.000300984728618004	Acer2	4	86792633	86853059	+	7159	protein_coding	alkaline ceramidase 2 [Source:MGI Symbol;Acc:MGI:1920932]	-	1500	1493	1845	2043	1151	1540	882	842	1488	1192	910	1498	8.44597946895307	9.22252436037767	9.42656851588507	11.8161593289841	8.40451379347929	9.78258775583751	4.77451434112819	4.435778372886	7.09717037413136	5.4483482147962	4.40470293629177
ENSMUSG00000042699	3270.06310377104	2568.22385576141	3031.45025109993	2911.09278684527	2533.28734585462	2944.30133874535	1891.06748671755	1918.63851878267	2314.49282906038	2177.15765355891	2017.65454212841	2143.44775032266	2876.4031136796	2077.07646342843	0.46984867230639	2.23651987930253e-07	0.000307092817093899	Dhx9	1	153331504	153363406	-	9603	protein_coding	DEAH (Asp-Glu-Ala-His) box polypeptide 9 [Source:MGI Symbol;Acc:MGI:108177]	-	3158	2332	3294	2766	1861	2550	1884	2000	2675	2595	2265	2464	13.2561167859756	10.7390034762761	12.5466067595294	11.9262959208283	10.1304579300064	12.0758760213802	7.6030342876092	7.85476464858959	9.51155491598358	8.84242524156488	8.17313874520297
ENSMUSG00000038375	25528.8586954944	31560.9602308793	28612.8778861408	27943.7543685932	20522.2138775413	26021.850694629	12619.161593956	15429.6909680502	21001.7511924421	18712.649057795	16308.7061180075	14684.0089388987	26698.419292213	16459.3279781916	0.697850388388889	2.9973476417321e-07	0.000352766407805856	Trp53inp2	2	155222979	155231770	+	5257	protein_coding	transformation related protein 53 inducible nuclear protein 2 [Source:MGI Symbol;Acc:MGI:1915978]	-	24654	28658	31091	26551	15076	22537	12572	16084	24273	22304	18308	16880	189.042973314002	241.073940672979	216.324811602477	209.123693078893	149.912478648812	194.959104673478	92.6785808037863	115.389475018053	157.659498607738	138.830773333601	120.678671539835
ENSMUSG00000043398	322.035980137047	252.19693952374	276.088365309647	352.572698334478	212.355091861	299.048645778449	121.453909709567	134.304696314787	178.237578611753	186.253949553016	177.268544760951	178.33067727928	285.71628682406	162.641559371559	0.812626754475975	3.92046696060479e-07	0.000430650227399234	Gpr135	12	72114750	72117899	-	3150	protein_coding	G protein-coupled receptor 135 [Source:MGI Symbol;Acc:MGI:2676315]	-	311	229	300	335	156	259	121	140	206	222	199	205	3.97979736352827	3.2148987091445	3.48353614686908	4.40346539140634	2.58883086415204	3.73916477998486	1.48863352710094	1.67620677600902	2.23301339774956	2.30612786861595	2.18912276150764
ENSMUSG00000038546	1701.30262175295	1997.75217596535	2016.36536131146	2080.70514808138	2084.07465153328	2627.93327332722	1419.30436635808	1266.30142239656	1622.30805775261	1484.15872414093	1231.0810495459	1410.98711486337	2084.68887199527	1405.69012250958	0.568237983481977	5.49611684677306e-07	0.000565996983026749	Ranbp9	13	43556151	43634758	-	5130	protein_coding	RAN binding protein 9 [Source:MGI Symbol;Acc:MGI:1928741]	-	1643	1814	2191	1977	1531	2276	1414	1320	1875	1769	1382	1622	12.9101510345627	15.6373185507994	15.6219280364126	15.9569409666594	15.6008211713436	20.1762423879695	10.6818143042229	9.70435501899958	12.4801144802687	11.283697406777	9.3350848958939
ENSMUSG00000031748	511.529820539232	673.993567635498	565.060854333745	684.09628035048	626.17527087218	498.799285622741	464.736861120078	329.046505971227	410.119476999859	380.897716653466	387.496567693537	387.977961300287	593.275846558979	393.379181623076	0.592757541092766	8.74162115439276e-07	0.00080019828756072	Gnao1	8	94536594	94696016	+	11053	protein_coding	guanine nucleotide binding protein, alpha O [Source:MGI Symbol;Acc:MGI:95775]	-	494	612	614	650	460	432	463	343	474	454	435	446	1.80159805223367	2.4485761661612	2.0318789051719	2.43496947243458	2.17554111202917	1.7774155316254	1.62335611183708	1.170372368936	1.46430934455253	1.34405377892907	1.36375602065145
ENSMUSG00000021313	132.542139734862	124.446524743156	129.761531695534	141.029079333791	107.538796519353	100.452633910135	41.1538041164648	37.413451116262	97.7710989472237	43.6270512466525	32.0686814642927	59.1535905121513	122.628450989472	51.8646129005078	1.24008019102661	1.20851942431271e-06	0.00104804076602108	Ryr2	13	11567988	12121831	-	28790	protein_coding	ryanodine receptor 2, cardiac [Source:MGI Symbol;Acc:MGI:99685]	-	128	113	141	134	79	87	41	39	113	52	36	68	0.179217093396644	0.173571790835911	0.179137730650909	0.192718527029246	0.143441579729481	0.137424125434326	0.0551893362953409	0.0510896646734253	0.134020563863692	0.0591020632288008	0.0433299741421533
ENSMUSG00000037204	561.233122939805	789.62971894551	742.677702682951	602.004726708422	638.426526171853	682.385133803333	392.466766086286	439.368220801231	444.728715565248	530.236468997777	457.869507573512	337.523428216393	669.392821875313	433.698851206741	0.625992567075199	1.30118700987708e-06	0.00107198291808723	Atg101	15	101182153	101188826	+	1597	protein_coding	autophagy related 101 [Source:MGI Symbol;Acc:MGI:1915368]	-	542	717	807	572	469	591	391	458	514	632	514	388	13.6806110306338	19.8543925962115	18.483245798682	14.8303515775586	15.351738344151	16.8293738807049	9.48822163278189	10.8160994532079	10.9898778422415	12.9495037453125	11.1528483467967
ENSMUSG00000074206	93.1936920010747	137.662084892871	58.8988512660581	76.8292745624385	87.1200376865641	34.638839279357	8.0300105593102	29.7388970411313	35.4744695295237	32.7202884349894	20.4883242688537	13.0485861423863	81.390463281394	23.2500959960324	1.80332701833721	1.49055266849436e-06	0.00116951601518007	Adh6b	3	138047536	138064622	+	4669	protein_coding	alcohol dehydrogenase 6B (class V) [Source:MGI Symbol;Acc:MGI:2446626]	-	90	125	64	73	64	30	8	31	41	39	23	15	0.777015639557529	1.18393675906181	0.501378515891202	0.647380062689692	0.716548734167328	0.292201724599837	0.0664016838386185	0.250407844563352	0.299843504377515	0.273326472535421	0.170699227634455
ENSMUSG00000030022	934.007890944104	831.478992752943	923.055434685254	885.115341191929	872.561627454494	795.538675449233	528.97694559456	613.964326010454	714.680776375281	600.710936396215	687.69505806761	696.79450000343	873.626327079659	640.470423741258	0.447648263333677	3.7318927246198e-06	0.00279501801925275	Adamts9	6	92749680	92920473	-	15048	protein_coding	a disintegrin-like and metallopeptidase (reprolysin type) with thrombospondin type 1 motif, 9 [Source:MGI Symbol;Acc:MGI:1916320]	-	902	755	1003	841	641	689	527	640	826	716	772	801	2.41623337987099	2.21876105778043	2.43798916339392	2.31407562301017	2.22673676685572	2.08221625938314	1.35720300364669	1.60402562297514	1.87428628376399	1.55695192647085	1.77773127046526
ENSMUSG00000021262	575.729919473306	487.874428860336	479.473461087754	372.569358837031	461.463949621019	482.634493959041	337.260443491028	350.151529677837	357.340388187641	328.041866104637	314.451237691537	314.905878902923	476.624268639748	333.691890675934	0.514852751892262	4.0347062045507e-06	0.00288630427061562	Evl	12	108520979	108654775	+	2940	protein_coding	Ena-vasodilator stimulated phosphoprotein [Source:MGI Symbol;Acc:MGI:1194884]	-	556	443	521	354	339	418	336	365	413	391	353	362	7.62322232701557	6.66344414293986	6.48186547328139	4.98558661585665	6.02756636639795	6.46568206577636	4.42899231203586	4.68226127482111	4.7966428568164	4.35181465554458	4.1605904602236
ENSMUSG00000054720	976.462795077927	908.569760292951	1058.33873368698	991.413378600234	721.462812091859	949.104196254382	676.528389621884	752.106299362806	626.42721803354	646.015951152354	603.960167577512	695.924594260604	934.225279334056	666.827103334783	0.488133839956063	4.20412104720367e-06	0.00288630427061562	Lrrc8c	5	105667254	105760884	+	7654	protein_coding	leucine rich repeat containing 8 family, member C [Source:MGI Symbol;Acc:MGI:2140839]	-	943	825	1150	942	530	822	674	784	724	770	678	800	4.96631611342179	4.76659064609267	5.49564919956156	5.09592208382703	3.61973723116272	4.88392238686855	3.41259239093696	3.86311569490451	3.22986797620106	3.2918742042246	3.06950842647512
ENSMUSG00000000805	1547.01528721784	1270.89636773099	1281.05001503676	1537.63794706469	1287.74305705453	1203.12235096967	720.693447698091	625.47615712315	764.864172295095	1177.09140190487	763.412778191634	1000.39160424962	1354.57750417908	841.988260243744	0.685624317971419	6.38851814838975e-06	0.00421054454124072	Car4	11	84848612	84856870	+	1966	protein_coding	carbonic anhydrase 4 [Source:MGI Symbol;Acc:MGI:1096574]	-	1494	1154	1392	1461	946	1042	718	652	884	1403	857	1150	30.6322013988617	25.9576074880194	25.8979472648212	30.7699674330191	25.1534323632739	24.1029166827266	14.1531760937768	12.5076060040958	15.3533593106436	23.351518171425	15.1051451326519
ENSMUSG00000021360	932.972405477425	912.974947009523	985.635464155441	1026.14442052572	665.651537948904	944.485684350468	585.187019509731	586.144067488105	687.858616487105	671.185403794654	651.17239306661	680.266290889741	911.31074324458	643.635631872658	0.502568132238431	7.60733188983218e-06	0.00482100029033711	Gcnt2	13	41013230	41114368	+	7051	protein_coding	glucosaminyl (N-acetyl) transferase 2, I-branching enzyme [Source:MGI Symbol;Acc:MGI:1100870]	-	901	829	1071	975	489	818	583	611	795	800	731	782	5.15092469942133	5.19931561884714	5.55582268325291	5.7255107599247	3.62533194200186	5.27579586377407	3.20428265944872	3.26813964731017	3.84991442466629	3.7126177418526	3.59247914995882
ENSMUSG00000059854	201.919666002328	159.688018475731	114.116524327988	198.914149209601	136.125058885256	103.916517838071	91.3413701121535	69.070986676176	105.558177624436	50.3389052845991	56.1201925625122	40.8855699128105	152.446655789829	68.8858670287813	1.14821876240591	8.5506932419943e-06	0.00511338686109486	Hydin	8	110993609	111336885	+	18037	protein_coding	HYDIN, axonemal central pair apparatus protein [Source:MGI Symbol;Acc:MGI:2389007]	-	195	145	124	189	100	90	91	72	122	60	63	47	0.435794184862813	0.355505286053619	0.251458893564536	0.433868212980741	0.289817981772472	0.226915205215386	0.195519494841634	0.150549147703865	0.230956499007476	0.108849868455686	0.121033011155793
ENSMUSG00000029778	728.98176854174	550.648339571486	614.756760089481	646.207870977223	530.8877296525	601.561175484833	426.594310963354	455.676648210883	442.998253636978	369.15197208706	465.886677939585	478.448158554165	612.173940719544	439.792670232004	0.478498497932479	8.68937501430213e-06	0.00511338686109486	Adcyap1r1	6	55428963	55478436	+	6601	protein_coding	adenylate cyclase activating polypeptide 1 receptor 1 [Source:MGI Symbol;Acc:MGI:108449]	-	704	500	668	614	390	521	425	475	512	440	523	550	4.29906539219688	3.34967473295536	3.70148803728825	3.85140307258692	3.08847796624713	3.58932996502352	2.49512424789931	2.7139009117704	2.6484689785826	2.18114183211506	2.74548800162436
ENSMUSG00000048376	841.849684409708	613.422250282635	653.409131232832	632.525945370213	435.600188432821	489.562261814912	355.327967249476	337.680379305749	378.105931326874	363.279099803856	358.99107305861	470.619006868733	611.061576923853	377.333909602217	0.696552350155683	9.1377233260187e-06	0.00519180231871759	F2r	13	95738311	95754995	-	3336	protein_coding	coagulation factor II (thrombin) receptor [Source:MGI Symbol;Acc:MGI:101802]	-	813	557	710	601	320	424	354	352	437	433	403	541	9.82371214744705	7.38365708759998	7.78470083180725	7.45948361228115	5.01433758966914	5.77996500114323	4.11235122497934	3.97948371282717	4.47290894372679	4.24720103160543	4.18607107720237
ENSMUSG00000098188	1778.96403175385	2205.89724832337	1969.43033920882	2378.55014398782	2187.52969628607	1698.45775266447	1606.00211186204	1600.14452466474	1511.55849434336	1133.46435065822	1203.46635161832	1259.62351561169	2036.47153537073	1385.70989145973	0.555645635321928	1.01479085875142e-05	0.00541470691873088	Sowahc	10	59057775	59062256	+	4482	protein_coding	sosondowah ankyrin repeat domain family member C [Source:MGI Symbol;Acc:MGI:3606051]	-	1718	2003	2140	2260	1607	1471	1600	1668	1747	1351	1351	1448	15.4512077550688	19.7629359362844	17.4643144177038	20.8783859294037	18.7427648998856	14.925408095511	13.8344248925707	14.0357073412803	13.3093153395521	9.86335036248646	10.4450636493601
ENSMUSG00000040740	19.6742238668935	12.1142634705727	27.6088365309647	61.0424373235813	108.900047108205	17.3194196396785	6.02250791948265	8.633873334522	5.19138578480834	6.71185403794654	15.1435440248049	6.95924594260604	41.109871323316	8.11040184069508	2.33428603520747	1.56285583792322e-05	0.00804724238795655	Slc25a34	4	141346135	141351132	-	2670	protein_coding	solute carrier family 25, member 34 [Source:MGI Symbol;Acc:MGI:2686215]	-	19	11	30	58	80	15	6	9	6	8	17	8	0.286849081984136	0.18218968691732	0.410978983619386	0.89945008330252	1.56627623587418	0.255484991040569	0.0870869274838511	0.127128042000684	0.0767316701528429	0.0980436992427068	0.220630350024907
ENSMUSG00000025017	877.056190276781	1230.1483906027	866.917467072293	707.250308300804	873.922878043347	887.908913527518	488.826892798009	419.222516354013	629.888141890078	734.948017155146	285.054946349268	376.669186643552	907.200691303907	489.101616865011	0.89094013572213	1.80671694894121e-05	0.00889013513358468	Pik3ap1	19	41260816	41373541	-	5572	protein_coding	phosphoinositide-3-kinase adaptor protein 1 [Source:MGI Symbol;Acc:MGI:1933177]	-	847	1117	942	672	642	769	487	437	728	876	320	433	6.12750151524827	8.86511617120252	6.18371429086182	4.99365459521967	6.02300957232899	6.27625566109389	3.38712194717566	2.95787923996925	4.46123328476579	5.14439090615469	1.99006134729615
ENSMUSG00000020593	6059.66095100321	9571.36943843156	8519.16665890468	9787.83908809148	10947.1772355523	10841.9566944387	6142.9580778723	4937.61622808719	7471.26937530334	5700.0420417261	5355.46980453688	6388.58777531235	9287.861677737	5999.32388380636	0.630453860451938	2.06934941594597e-05	0.00947129731292826	Lpin1	12	16585670	16696967	-	9930	protein_coding	lipin 1 [Source:MGI Symbol;Acc:MGI:1891340]	-	5852	8691	9257	9300	8042	9390	6120	5147	8635	6794	6012	7344	23.7556103786983	38.7046252790057	34.098135767518	38.7787703901185	42.3354766054424	43.0032954405869	23.884444945571	19.5485716226248	29.6925677177805	22.3881009993544	20.9796054962017
ENSMUSG00000024768	426.620012271586	420.695331432615	265.044830697261	508.336159091203	123.873803585583	159.338660685042	51.1913173156025	110.321714830003	137.571723297421	185.414967798273	119.366758783756	49.584627341068	317.318132960548	108.908518227687	1.54260824537794	2.23969728563372e-05	0.00997391680415861	Lipf	19	33938587	33954210	+	1411	protein_coding	lipase, gastric [Source:MGI Symbol;Acc:MGI:1914967]	-	412	382	288	483	91	138	51	115	159	221	134	57	11.7701318268428	11.9723309886252	7.46577838988809	14.1736091049117	3.37135132025469	4.44772028343057	1.40073552037279	3.07383772708954	3.84773162414202	5.12514578420836	3.29082947562894
ENSMUSG00000025006	7524.87288635344	9183.71300737324	8992.19805813521	9297.39467787099	9349.06904423942	9656.15376310876	6411.9634316092	5601.465155586	7421.08597938352	7232.86170764214	6947.32352055607	7388.10947381914	9000.56690618017	6833.80154476601	0.397208988669008	2.96886387615375e-05	0.012172679636501	Sorbs1	19	40283197	40502223	-	14718	protein_coding	sorbin and SH3 domain containing 1 [Source:MGI Symbol;Acc:MGI:700014]	-	7267	8339	9771	8834	6868	8363	6388	5839	8577	8621	7799	8493	19.9029515750108	25.0557577232172	24.2828599508158	24.8524340777165	24.3933316788261	25.840367879662	16.8201199402938	14.9623492128771	19.8985428068294	19.166808773505	18.3619041373275
ENSMUSG00000054555	1747.89946775349	1659.65409546846	1003.12106062505	2133.32793887757	1248.2667899778	1024.15501469299	691.584659420591	880.655080121244	963.002063081947	862.47324387613	751.832420996195	361.880789015514	1469.40406123256	751.904709418604	0.966672201299152	2.96967416602067e-05	0.012172679636501	Adam12	7	133484928	133833875	-	10573	protein_coding	a disintegrin and metallopeptidase domain 12 (meltrin alpha) [Source:MGI Symbol;Acc:MGI:105378]	-	1688	1507	1090	2027	917	887	689	918	1113	1028	844	416	6.4355450503976	6.30314627612658	3.77083809712632	7.93808693148249	4.53378307144612	3.81514265538932	2.52542205629303	3.2745721137299	3.5944429444482	3.18152870440523	2.76612504200004
ENSMUSG00000026094	685.491378941238	694.918204539215	873.359528929518	741.98135022629	615.285266161359	690.467529635183	405.515533245165	458.554605989057	532.98227390699	640.143078869151	423.128435987195	472.358818354385	716.9172097388	488.780457725324	0.552852743224954	2.98038575171152e-05	0.012172679636501	Stk17b	1	53794665	53824383	-	5185	protein_coding	serine/threonine kinase 17b (apoptosis-inducing) [Source:MGI Symbol;Acc:MGI:2138162]	-	662	631	949	705	452	598	404	478	616	763	475	543	5.1465992627543	5.38174311962291	6.69463759604184	5.62990012404648	4.55700292310125	5.24490730690884	3.01957335063583	3.47687635023664	4.05664135434856	4.8152267245476	3.17447888614316
ENSMUSG00000037280	60.0581570673592	77.090767540008	88.3482768990871	47.3605117165717	53.08877296525	71.5869345106712	23.0862803580168	22.0643429660007	50.1833959198139	33.5592701897327	29.3962913422683	17.3981148565151	66.2555701164912	29.2812826053913	1.17712402655683	3.02894862594246e-05	0.012172679636501	Galnt6	15	100589694	100627257	-	3871	protein_coding	polypeptide N-acetylgalactosaminyltransferase 6 [Source:MGI Symbol;Acc:MGI:1891640]	-	58	70	96	45	39	62	23	23	58	40	33	20	0.60397080634765	0.799681841310609	0.907105253434263	0.48133747632171	0.52666089008518	0.728373123514265	0.23025954605973	0.224086025984156	0.511610541628746	0.338125390051701	0.295405354152212
ENSMUSG00000032401	1251.90192921444	1025.30720828211	632.242356559092	820.915536420576	955.597913374501	871.744121863818	697.607167340074	659.052331201846	590.087517539881	548.69406760213	398.186128181634	437.562588641355	926.284844285755	555.198300084487	0.73862055350699	3.33805399246366e-05	0.012790957124145	Lctl	9	64024429	64045400	+	2604	protein_coding	lactase-like [Source:MGI Symbol;Acc:MGI:2183549]	-	1209	931	687	780	702	755	695	687	682	654	447	503	18.7152850294537	15.8106988566005	9.6499569874962	12.402634828949	14.0924260750212	13.1853409930653	10.3432448147343	9.95006384030699	8.94289346186109	8.21821940973645	5.94831744039096
ENSMUSG00000037613	293.042387070046	298.451400047745	235.595405064232	268.376233060573	272.250117770513	169.730312468849	195.731507383186	159.246997058961	183.428964396561	130.881153739958	128.274725857171	99.1692546821361	256.24097591366	149.455433852996	0.779178597537409	4.51254588003883e-05	0.0148243009907147	Tnfrsf23	7	143219546	143239609	-	3962	protein_coding	tumor necrosis factor receptor superfamily, member 23 [Source:MGI Symbol;Acc:MGI:1930269]	-	283	271	256	255	200	147	195	166	212	156	144	114	2.87927461991595	3.0248036290846	2.36338848126807	2.66493145753852	2.63879199254421	1.68728426945167	1.90736197183523	1.5801696891453	1.82707364013609	1.28840111082068	1.25943458410156
ENSMUSG00000008730	3975.22870657917	3291.77577395834	3994.9986460306	4246.65921725259	3260.19516030189	3900.3333028556	2476.25450622728	2391.58291366259	2928.80681359604	3242.66448208292	2585.98284141227	3068.15755494644	3778.1984678297	2782.24151865459	0.44147889222709	4.58845269482581e-05	0.0148243009907147	Hipk1	3	103647131	103698879	-	10914	protein_coding	homeodomain interacting protein kinase 1 [Source:MGI Symbol;Acc:MGI:1314873]	-	3839	2989	4341	4035	2395	3378	2467	2493	3385	3865	2903	3527	14.1789897124796	12.1111206715559	14.5484074896799	15.3080518220121	11.4712620621826	14.0754111556567	8.75988045589921	8.61486426454883	10.5903273816182	11.5879473213313	9.21702319388243
ENSMUSG00000034220	2621.84920163023	3086.93459163775	2575.90444833901	3033.17766149244	3196.21638262582	1812.76592228635	2427.07069155151	1531.07353798857	1750.36224044455	1418.71814727095	1620.35921065412	1109.12982210284	2721.14136800193	1642.78560833542	0.728195100366307	5.28395394748396e-05	0.0160836538358898	Gpc1	1	92759367	92788501	+	5159	protein_coding	glypican 1 [Source:MGI Symbol;Acc:MGI:1194891]	-	2532	2803	2799	2882	2348	1570	2418	1596	2023	1691	1819	1275	19.7837811061796	24.0270214239209	19.8448120931205	23.1307003629676	23.7915204664009	13.8394719124244	18.1636760693736	11.6674908560736	13.389520271379	10.7255369444137	12.2178493309974
ENSMUSG00000051596	716.555942941596	789.62971894551	675.496200457604	616.739108131356	1368.05684179683	401.810535640541	489.830644117922	471.985075620536	430.019789174957	212.262383950059	319.796017935585	240.963890762734	761.381391318906	360.809633593632	1.07726487307421	5.76252355476997e-05	0.016657736949464	Otop1	5	38433316	38461552	+	3433	protein_coding	otopetrin 1 [Source:MGI Symbol;Acc:MGI:2388363]	-	692	717	734	586	1005	348	488	492	497	253	359	277	8.12537504158047	9.23608068049804	7.82045239846199	7.06779829312247	15.3031872179325	4.60989288814943	5.50882527596653	5.40507107789684	4.94330318361593	2.41150230394119	3.62366665083488
ENSMUSG00000038301	1549.0862581512	1808.32914715276	1827.70497834987	1717.60789158767	1649.83571368931	1673.05593719294	1376.14305960179	1211.62022461125	1419.84401214508	1464.02316202709	1045.79533441888	1040.4072684196	1704.26998768729	1259.63884353728	0.436279170488056	6.32459613979738e-05	0.0176105043612109	Snx10	6	51500881	51567659	+	9300	protein_coding	sorting nexin 10 [Source:MGI Symbol;Acc:MGI:1919232]	-	1496	1642	1986	1632	1212	1449	1371	1263	1641	1745	1174	1196	6.48425028381932	7.8078699315904	7.81098701835064	7.26603591209813	6.81254375045469	7.0855053612006	5.7130429057269	5.12189312443401	6.02504499685621	6.13978899632604	4.37434207831167
ENSMUSG00000066406	2513.12322762898	2682.75871039228	2672.53537619739	3157.36744777145	2737.47493418251	2907.35324351403	1841.88367204178	1620.29022911196	2430.43377825444	2261.89481078798	2076.44712481295	2113.00104932376	2778.43548994777	2057.32511072215	0.433223125520673	6.40100653622739e-05	0.0176105043612109	Akap13	7	75105282	75404357	+	21024	protein_coding	A kinase (PRKA) anchor protein 13 [Source:MGI Symbol;Acc:MGI:2676556]	-	2427	2436	2904	3000	2011	2518	1835	1689	2809	2696	2331	2429	4.65334822276942	5.12394314062144	5.05232040479129	5.9083503641595	5.00018825664464	5.4466036398567	3.38246802749837	3.029872907405	4.56216568442753	4.19609684843965	3.84197486786675
ENSMUSG00000039414	1013.74027187836	943.811254025526	1017.84577344157	1047.1935368442	1019.57669105057	1117.67988074725	884.304912844036	730.041956396805	853.982961600972	883.447787744713	717.091349409878	740.289787144718	1026.64123466458	801.526459190187	0.357021939810777	6.41275876477911e-05	0.0176105043612109	Heatr5b	17	79060327	79142793	-	8173	protein_coding	HEAT repeat containing 5B [Source:MGI Symbol;Acc:MGI:2444098]	-	979	857	1106	995	749	968	881	761	987	1053	805	851	4.82850091038395	4.63704903848973	4.94974981935527	5.04082842961821	4.79060046003344	5.38616002645959	4.17741275974629	3.51166652663825	4.12354098937733	4.21587606842442	3.41304469397827
ENSMUSG00000048355	577.800890406663	686.107831106071	450.944330005757	820.915536420576	612.562764983654	523.046473118291	363.357977808787	266.690754110791	397.141012537838	493.321271789071	321.577611350268	432.3431541844	611.896304340169	379.071963630192	0.689918899418261	7.25429376951726e-05	0.0195949177771042	Arxes1	X	134934116	134935695	+	1580	protein_coding	adipocyte-related X-chromosome expressed sequence 1 [Source:MGI Symbol;Acc:MGI:1923469]	-	558	623	490	780	450	453	362	278	459	588	361	497	14.2360084372047	17.4370625497778	11.3435401744566	20.4407981611286	14.8882982389464	13.0384663085856	8.87900832175543	6.6358692303395	9.91951094118286	12.177585922712	7.9173110751492
ENSMUSG00000031442	2373.33268962737	2555.00829561169	2751.68070758615	3002.65644283065	2108.57716213262	2638.32492511103	1196.47157333722	1212.57954387065	1823.04164143186	1857.5056050017	1539.29671028605	2297.42106680282	2571.59670381658	1654.38602345505	0.636262731240571	7.68533955597486e-05	0.0204244096554512	Mcf2l	8	12923806	13070905	+	12984	protein_coding	mcf.2 transforming sequence-like [Source:MGI Symbol;Acc:MGI:103263]	-	2292	2320	2990	2853	1549	2285	1192	1264	2107	2214	1728	2641	7.11569346918231	7.90172377640064	8.42310669523681	9.0981606062339	6.23637962551555	8.00318934118381	3.55779342379344	3.67154349273695	5.54103241761843	5.57969003031954	4.61171887450127
ENSMUSG00000075408	3.10645640003582	7.7090767540008	11.963829163418	10.5245581592382	13.6125058885256	5.77313987989284	0	0	0.865230964134723	0	0	2.60971722847726	8.78159437418522	0.579158032101998	3.87996194602853	8.03718858870749e-05	1	Smim41	15	101191093	101195307	+	1967	protein_coding	small integral membrane protein 41 [Source:MGI Symbol;Acc:MGI:1924967]	-	3	7	13	10	10	5	0	0	1	0	0	3	0.0614791733789883	0.157375109695647	0.241740052896609	0.210501877742907	0.265757343021356	0.115598191167314	0	0	0.0173592238017362	0	0
ENSMUSG00000022523	34.171020400394	18.7220435454305	8.28265095928942	15.7868372388572	12.2512552996731	6.9277678558714	0	4.79659629695667	4.32615482067362	4.19490877371659	0	0.869905742825755	16.0235958832526	2.3645942723621	2.75219407918477	9.02428075904984e-05	1	Fgf12	16	27978850	28571820	-	6203	protein_coding	fibroblast growth factor 12 [Source:MGI Symbol;Acc:MGI:109183]	-	33	17	9	15	9	6	0	5	5	5	0	1	0.214448633629078	0.121196340321797	0.0530701540994886	0.100126679071489	0.0758455947687744	0.0439880655217359	0	0.0304003324683241	0.0275234509253708	0.0263760153331077	0
ENSMUSG00000027654	362.419913337513	468.051088635763	323.023387412287	316.789200593068	296.752628369859	289.81162197062	195.731507383186	169.799508912266	205.059738499929	296.160559424391	195.975275615122	105.258594881916	342.807973386518	194.664197452802	0.816252101750026	9.42196816896687e-05	0.0241484129676246	Fam83d	2	158610013	158628557	+	3991	protein_coding	family with sequence similarity 83, member D [Source:MGI Symbol;Acc:MGI:1919128]	-	350	425	351	301	218	251	195	177	237	353	220	121	3.5350653063363	4.7092263782016	3.21688109979604	3.12280669630693	2.85538319297459	2.8600747756729	1.89350241353324	1.67263680417337	2.0276886977373	2.89423599891141	1.91015472466919
ENSMUSG00000020264	7594.25041262091	8031.75668098969	6073.94403681224	8253.35850847456	7636.61580346289	5054.96127883417	5347.98703250059	5228.28996368277	5580.73971866896	4124.43430631815	4503.86815231844	3221.26096568377	7107.48112019908	4667.76335652878	0.60663664232375	0.00010368192916094	0.0254980171161912	Slc36a2	11	55049296	55075903	-	3255	protein_coding	solute carrier family 36 (proton/amino acid symporter), member 2 [Source:MGI Symbol;Acc:MGI:1891430]	-	7334	7293	6600	7842	5610	4378	5328	5450	6450	4916	5056	3703	90.824086290166	99.0826438334588	74.1656082881804	99.7553459780699	90.0951684112466	61.1660109855787	63.4345995659329	63.147421169925	67.6617745794769	49.4198980039931	53.8249538767189
ENSMUSG00000028195	1829.7028196211	1933.87696857506	2805.05779154602	1409.23833752199	1976.53585501392	2811.51912150781	836.124849488175	1118.56625645029	1624.90375064501	1255.116705096	782.119509045805	1596.27703808526	2127.65514896432	1202.18468480176	0.823487715962111	0.00010589980152172	0.0256604563187261	Ccn1	3	145352731	145355736	-	2019	protein_coding	cellular communication network factor 1 [Source:MGI Symbol;Acc:MGI:88613]	-	1767	1756	3048	1339	1452	2435	833	1166	1878	1496	878	1835	35.2786010636359	38.4618844119768	55.2189652523021	27.4602566678395	37.5941206184154	54.8463891365596	15.9890132314766	21.7807254921231	31.7609826961032	24.245784346157	15.069047121446
ENSMUSG00000025059	664.781669607666	511.001659122339	415.973137066535	523.070540514136	573.08649790693	327.914345177913	254.952835258099	363.581999309315	359.936081080045	354.05030050168	281.491759519902	200.948226592749	502.637974899253	302.493533710298	0.732218941332453	0.000121933199046096	0.0285426871420614	Gk	X	84745543	84820425	-	7743	protein_coding	glycerol kinase [Source:MGI Symbol;Acc:MGI:106594]	-	642	464	452	497	421	284	254	379	416	422	316	231	3.34223431277342	2.65003180970647	2.13520115627543	2.65770922355144	2.84225127285789	1.66799396449475	1.27126894143093	1.84603555242373	1.83450429790705	1.78338108105268	1.41418236527121
ENSMUSG00000019970	3057.78858310193	2887.59989271287	4060.33955915388	3292.08179220969	3582.81154985995	2564.4287346484	1628.08464090014	2342.65763143364	2259.11804735576	2177.99663531365	1546.42308394478	2808.92564358436	3240.84168528112	2127.20094708872	0.607375974479896	0.000122991490385772	0.0285426871420614	Sgk1	10	21758083	21875802	+	4903	protein_coding	serum/glucocorticoid regulated kinase 1 [Source:MGI Symbol;Acc:MGI:1340062]	-	2953	2622	4412	3128	2632	2221	1622	2442	2611	2596	1736	3229	24.2779872193688	23.6490206142725	32.9141944809009	26.4158862192839	28.061677215561	20.6002295304908	12.8204106442115	18.7842507256405	18.1835904328447	17.325419473663	12.2691767106267
ENSMUSG00000035107	1232.22770534754	1135.4368761964	959.86721672654	1078.76721132191	830.362859200065	917.929240902961	790.956040092055	655.215054164281	851.387268708568	791.998776477692	711.746569165829	580.227130464779	1025.76518494924	730.255139845534	0.490781477937237	0.000130351736135438	0.029830632726439	Dcbld2	16	58228806	58290090	+	8401	protein_coding	discoidin, CUB and LCCL domain containing 2 [Source:MGI Symbol;Acc:MGI:1920629]	-	1190	1031	1043	1025	610	795	788	683	984	944	799	667	5.70988158169263	5.4271277711029	4.54111964199937	5.05188219686115	3.79567031509386	4.30349733152612	3.63503178091742	3.06619540891782	3.99943622503593	3.67690130739283	3.29566749489652
ENSMUSG00000092009	20.7097093335721	17.6207468662875	9.20294551032158	9.47210234331434	8.16750353311539	13.8555357117428	3.01125395974133	2.877957778174	0.865230964134723	3.35592701897327	6.23557695139024	0.869905742825755	13.171423883059	2.86930873587322	2.20568947714344	0.000142038090436362	1	Myh15	16	48877849	49019467	+	6340	protein_coding	myosin, heavy chain 15 [Source:MGI Symbol;Acc:MGI:3643515]	-	20	16	10	9	6	12	3	3	1	4	7	1	0.127160393308591	0.11160228599237	0.0576926333472008	0.0587778350423136	0.0494711066614834	0.0860750695366964	0.0183377047619781	0.0178460500600329	0.00538574025520742	0.0206448483421157	0.038259243291571
ENSMUSG00000027674	281.652046936581	115.636151310012	79.1453313887656	207.333795736992	62.617527087218	129.3183333096	28.1050369575857	58.5184748228713	71.814170023182	85.5761389838184	60.5741760992195	39.145758427159	145.950530961528	57.2889592189727	1.34872157069248	0.000145987789377943	0.0325059568321671	Pex5l	3	33003557	33197396	-	8846	protein_coding	peroxisomal biogenesis factor 5-like [Source:MGI Symbol;Acc:MGI:1916672]	-	272	105	86	197	46	112	28	61	83	102	68	45	1.23946164963147	0.524909858870682	0.355599495887721	0.922103404063969	0.271831968248456	0.575779875806555	0.122665963876191	0.260071648210759	0.320380311677058	0.377306424538757	0.266372613414652
ENSMUSG00000025790	698.95269000806	930.595693875811	1029.80960260498	809.338522445414	924.289149830892	849.806190320225	599.239537988524	699.343740096282	771.786020008173	611.617699207878	525.570057331463	552.390146694354	873.798641514231	626.657866887779	0.479664764430975	0.000157333713757166	0.0345651680210244	Slco3a1	7	73925167	74204528	-	8474	protein_coding	solute carrier organic anion transporter family, member 3a1 [Source:MGI Symbol;Acc:MGI:1351867]	-	675	845	1119	769	679	736	597	729	892	729	590	635	3.21089746969622	4.40971594544286	4.8300457821145	3.75749329498595	4.18861986119805	3.94979675551603	2.73022758909574	3.2445104606429	3.59427297031738	2.8150105840952	2.41263234526536
ENSMUSG00000090394	797.323809342528	969.141077645814	1208.34674550522	1100.86878345631	846.697866266295	1080.73178551594	627.344574946109	681.116674167847	769.190327115769	675.380312568371	556.747942088415	875.12517728271	1000.51834462202	697.484168028203	0.520840834658482	0.000166955813196701	0.0361964596584478	4930523C07Rik	1	159871952	159907778	+	10195	protein_coding	RIKEN cDNA 4930523C07 gene [Source:MGI Symbol;Acc:MGI:1914897]	-	770	880	1313	1046	622	936	625	710	889	805	625	1006	3.04449047598764	3.8171375307052	4.71071810581761	4.24819837589241	3.18928101516146	4.17516855196539	2.37577750921492	2.62652312376107	2.97748233161505	2.58374478871152	2.12432216832971
ENSMUSG00000042029	418.336128538157	189.423028812591	193.261855716753	267.323777244649	299.475129547564	162.802544612978	101.378883311291	148.694485205657	143.628340046364	177.864132005583	137.182692930585	140.054824594947	255.103744078782	141.467226349071	0.849344127517112	0.000177624878331148	0.038009417146264	Ncapg2	12	116369022	116427351	+	9939	protein_coding	non-SMC condensin II complex, subunit G2 [Source:MGI Symbol;Acc:MGI:1923294]	-	404	172	210	254	220	141	101	155	166	212	154	161	1.6385126522029	0.765293671577623	0.77283400783241	1.05816004783334	1.15709661554545	0.645151655612858	0.393814463805382	0.588164919139899	0.570295650889476	0.697965785281992	0.536915107587113
ENSMUSG00000028528	301.326270803475	175.106171983732	100.312106062505	175.760121259277	72.1462812091859	185.895104132549	46.1725607160337	83.460775567046	61.4313984535654	108.228646361888	93.5336542708537	61.7633077406286	168.424342575121	75.7650571850025	1.15264466521277	0.000180065856502786	0.0380377579179026	Dnajc6	4	101353828	101499996	+	5926	protein_coding	DnaJ heat shock protein family (Hsp40) member C6 [Source:MGI Symbol;Acc:MGI:1919935]	-	291	159	109	167	53	161	46	87	71	129	105	71	1.97944056725238	1.18652759468306	0.672782166738384	1.1668503428601	0.467523941399248	1.23551955336494	0.300821701922786	0.553691320289851	0.409101774971156	0.712309975745981	0.613981443980493
ENSMUSG00000111761	3.10645640003582	5.50648339571485	5.52176730619295	7.36719071146671	2.72250117770513	9.23702380782854	1.00375131991378	0	0	0	0	0.869905742825755	5.576903799824	0.312276177123255	4.11165144641306	0.00018514758272948	1	9230112J17Rik	9	60431250	60453185	-	2468	lncRNA	RIKEN cDNA 9230112J17 gene [Source:MGI Symbol;Acc:MGI:1924999]	-	3	5	6	7	2	8	1	0	0	0	0	1	0.0489990008251499	0.08959158392317	0.0889233295189433	0.117439236411754	0.0423618066226101	0.147411113144964	0.0157024646395112	0	0	0	0
ENSMUSG00000030162	74.5549536008597	40.7479771282899	29.449425633029	67.3571722191242	17.6962576550833	81.9785862944783	6.02250791948265	17.267746669044	22.4960050675028	30.2033431707594	4.45398353670732	6.08934019978029	51.9640620884774	14.4221544272127	1.845703227661	0.000187556167482043	0.0388515081698217	Olr1	6	129462207	129484128	-	3572	protein_coding	oxidized low density lipoprotein (lectin-like) receptor 1 [Source:MGI Symbol;Acc:MGI:1261434]	-	72	37	32	64	13	71	6	18	26	36	5	7	0.812516466090504	0.458070833008297	0.327678652113105	0.741871791301766	0.190248628734577	0.903924780730882	0.0650957716634609	0.190051440168996	0.248540152202797	0.329785847256753	0.04850495970016
ENSMUSG00000004360	330.319863870476	381.048650983468	459.226980965047	400.985665866974	593.505256739718	377.563348144991	374.399242327838	181.311340024962	209.385893320603	315.457139783487	179.940934882976	138.315013109295	423.774961095112	233.134927241527	0.86200126079654	0.000198065587562361	0.0388515081698217	9330159F19Rik	10	29087602	29106775	+	5767	protein_coding	RIKEN cDNA 9330159F19 gene [Source:MGI Symbol;Acc:MGI:3036239]	-	319	346	499	381	436	327	373	189	242	376	202	159	2.22972783987249	2.6531909858278	3.16490161982323	2.73549142936073	3.95208403785732	2.57859535087695	2.50652395672048	1.23600993843911	1.4328478513542	2.13343225558649	1.2137493546694
ENSMUSG00000032712	1474.53130455034	1074.86555884354	1270.00648042438	1669.19492405517	959.681665141058	1121.14376467519	573.142003670766	783.76383492272	658.440763706524	1088.15933590208	638.701239163829	989.952735335709	1261.57061628161	788.693318783605	0.677736595547082	0.000216297817098568	0.0419286956745071	Resf1	6	149210912	149237161	+	9629	protein_coding	retroelement silencing factor 1 [Source:MGI Symbol;Acc:MGI:1914496]	-	1424	976	1380	1586	705	971	571	817	761	1297	717	1138	5.96128557717774	4.48240399674829	5.24212678036483	6.81996789825727	3.82734457445966	4.58588793036347	2.29809459331282	3.20000737978874	2.69859761542315	4.40757542372652	2.58027243549927
ENSMUSG00000022425	3878.92855817806	4297.25964201587	5153.64948578008	5206.49892137511	4070.13926066917	3544.7078862542	3129.69661549115	3328.83783008793	3510.24202149457	2566.44518775981	2556.58655007	3610.97873846971	4358.53062571208	3117.13115722886	0.483786101585637	0.00022386960058406	0.042559054819912	Enpp2	15	54702297	54816288	-	5779	protein_coding	ectonucleotide pyrophosphatase/phosphodiesterase 2 [Source:MGI Symbol;Acc:MGI:1321390]	-	3746	3902	5600	4947	2990	3070	3118	3470	4057	3059	2870	4151	26.1292054277336	29.859115336063	35.4441815947226	35.4445567804969	27.0463165639694	24.1585617241788	20.9091508484371	22.6457594803433	23.9710454551803	17.3207919812205	17.2090460308201
ENSMUSG00000025582	26.9226221336438	7.7090767540008	6.4420618572251	13.6819256070096	17.6962576550833	9.23702380782854	5.01875659956888	2.877957778174	4.32615482067362	0.838981754743317	0	0	13.6148279691319	2.17697515885997	2.66548924545904	0.000224604941597719	1	Nptx1	11	119429545	119438579	-	5217	protein_coding	neuronal pentraxin 1 [Source:MGI Symbol;Acc:MGI:107811]	-	26	7	7	13	13	8	5	3	5	1	0	0	0.200892459583938	0.0593361780278583	0.0490779963187421	0.103176988992982	0.130260322376828	0.0697356003913686	0.0371417315797525	0.0216875517309965	0.0327253145658569	0.00627220330117949	0
ENSMUSG00000027679	713.449486541561	683.905237747785	561.379676129616	689.358559430099	634.342774405295	449.150282655663	476.781876959043	389.483619312881	421.36747953361	458.923019844595	517.55288696539	369.709940700946	621.931002818336	438.969803886078	0.502811563620254	0.000234424046523623	0.0434000563434801	Dnajc19	3	34110169	34135470	-	4027	protein_coding	DnaJ heat shock protein family (Hsp40) member C19 [Source:MGI Symbol;Acc:MGI:1914963]	-	689	621	610	655	466	389	475	406	487	547	581	425	6.89681722962734	6.81949690017383	5.54061311663682	6.73472713572871	6.04914396014209	4.39292072253069	4.571144598187	3.80237121898246	4.12935284260575	4.44474305646203	4.99944847402297
ENSMUSG00000030244	930.901434544068	1018.69942820725	737.155935376758	1251.36996513342	797.692845067603	667.374970115612	602.250791948265	720.448763802892	643.731837316234	488.287381260611	433.817996475293	294.898046817931	900.532429740784	530.572469603538	0.763707830198853	0.000247464036429351	0.0436697377125453	Gys2	6	142368339	142418835	-	2657	protein_coding	glycogen synthase 2 [Source:MGI Symbol;Acc:MGI:2385254]	-	899	925	801	1189	586	578	600	751	744	582	487	339	13.6388973903885	15.3954555467222	11.026827536034	18.5289425327676	11.52910765983	9.89285578404889	8.75130208437646	10.6600316137043	9.56128014836403	7.16757743701598	6.35133471703795
ENSMUSG00000021003	604.723512540307	658.575414127497	506.162003067687	620.948931395051	635.704024994148	564.613080253519	464.736861120078	457.595286729666	498.373035341601	505.90599811022	464.105084524902	398.416830214196	598.454494396368	464.855516006777	0.363192293200197	0.000251751967202516	0.0436697377125453	Galc	12	98168553	98225718	-	14879	protein_coding	galactosylceramidase [Source:MGI Symbol;Acc:MGI:95636]	-	584	598	550	590	467	489	463	477	576	603	521	458	1.58215937176106	1.77733709812736	1.35206809921157	1.64186937413116	1.64071356924958	1.4945846219607	1.20592480033169	1.20907918700966	1.32185373301813	1.3261252118569	1.21336530763511
ENSMUSG00000066687	1740.65106948674	2209.2011383608	2106.55422731261	2676.39513989426	3307.83893091173	3674.0262195638	1968.35633835091	849.956863820722	1675.95237752896	1471.57399781978	1034.21497722344	1903.35376530275	2619.11112092166	1483.90138667443	0.819492948403543	0.000251782793147527	0.0436697377125453	Zbtb16	9	48565597	48747522	-	5283	protein_coding	zinc finger and BTB domain containing 16 [Source:MGI Symbol;Acc:MGI:103222]	ZBTB	1681	2006	2289	2543	2430	3182	1961	886	1937	1754	1161	2188	12.8262064934889	16.7916233359645	15.8480124024086	19.9308620693189	24.0444748390481	27.3908152537221	14.3850031864746	6.32503919737645	12.519404516997	10.8640046237805	7.61516298818307
ENSMUSG00000032254	426.620012271586	114.534854630869	163.812430083724	190.494502682211	265.44386482625	122.390565453728	40.150052796551	129.50810001783	120.267104014727	52.0168687940857	119.366758783756	66.1128364547574	213.882704991395	87.9036201436178	1.2825073821555	0.000258513467882033	0.0443700667738777	Kif23	9	61823187	61854056	-	7901	protein_coding	kinesin family member 23 [Source:MGI Symbol;Acc:MGI:1919069]	-	412	104	178	181	195	106	40	135	139	62	134	76	2.10196886567209	0.58209469760101	0.82403861011243	0.948542615202809	1.29015586983909	0.610111480945887	0.196196343401158	0.644409325671104	0.600713511872433	0.256773730740376	0.587692746502017
ENSMUSG00000079685	187.422869468828	122.24393138487	138.964477205856	142.081535149715	172.878824784276	146.637752949278	95.3563753918086	108.403076311221	131.515106548478	88.9320660027917	74.8269234166829	88.730385768227	151.70489849047	97.9606555732015	0.629764214477311	0.000284147746816778	0.0472919436797984	Ulbp1	10	7390362	7423638	-	6726	protein_coding	UL16 binding protein 1 [Source:MGI Symbol;Acc:MGI:1925027]	-	181	111	151	135	127	127	95	113	152	106	84	102	1.08475793738731	0.729807767843728	0.821163627841351	0.831069300107645	0.987043950383914	0.858681788204446	0.547368400145674	0.633624104668886	0.771651824135934	0.515691491221953	0.432762894680749
ENSMUSG00000027962	681.349437074524	693.816907860072	731.634168070565	807.233610813566	626.17527087218	792.074791521297	543.029464073352	559.283128225147	633.349065746617	507.583961619707	418.674452450488	581.96694195043	722.047364368701	540.647835677624	0.417984282798771	0.000288323678921421	0.0475070925758826	Vcam1	3	115903598	115923337	-	8870	protein_coding	vascular cell adhesion molecule 1 [Source:MGI Symbol;Acc:MGI:98926]	-	658	630	795	767	460	686	541	583	732	605	470	669	2.99029061991722	3.14093750500793	3.27833348207324	3.58040436786999	2.71096458976983	3.51710950236548	2.36366881139794	2.47887738267174	2.81787759138523	2.2318896501086	1.83612325914355
ENSMUSG00000002910	498.06850947241	784.123235549795	775.808306520109	1008.25267165502	2024.17962562376	986.052291485696	523.958188994991	410.588643019491	526.060426193912	496.677198808044	445.398353670732	744.639315858846	1012.74744005113	524.553687757669	0.948209154072188	0.000292813203877002	0.0477691402008056	Arrdc2	8	71287773	71292364	-	3232	protein_coding	arrestin domain containing 2 [Source:MGI Symbol;Acc:MGI:1918057]	-	481	712	843	958	1487	854	522	428	608	592	500	856	5.9990827012729	9.74206464945155	9.54038372648876	12.2731061693207	24.0507846400406	12.0163318248945	6.25910346077468	4.99439085797242	6.42342842715135	5.99364916348205	5.36075854111917
ENSMUSG00000032783	124.258256001433	70.4829874651501	53.3770839598651	45.2556000847241	93.926290630827	17.3194196396785	14.0525184787929	28.77957778174	25.091697959907	10.0677810569198	40.0858518303659	22.6175493134696	67.4366062969463	23.4491627368659	1.5231170593462	0.000307210677137484	0.0486722146845607	Troap	15	98972456	98981290	+	3520	protein_coding	trophinin associated protein [Source:MGI Symbol;Acc:MGI:1925983]	-	120	64	58	43	69	15	14	30	29	12	45	26	1.37419925041443	0.804043742263213	0.602691339046384	0.505808503448091	1.02469840530931	0.193791172181341	0.154133965404657	0.321431697104002	0.281313125943874	0.111552561212227	0.442993592170666
ENSMUSG00000068794	277.510105069867	301.755290085174	321.182798310223	208.386251552915	276.333869537071	245.935758883435	111.416396510429	122.792865202091	196.407428858582	229.042019044926	126.493132442488	204.427849564052	271.850678906447	165.096615270428	0.717770388808828	0.000312597683740168	0.0490540193808262	Col28a1	6	7997808	8192617	-	4904	protein_coding	collagen, type XXVIII, alpha 1 [Source:MGI Symbol;Acc:MGI:2685312]	-	268	274	349	198	203	213	111	128	227	273	142	235	2.20290342045772	2.47082773162859	2.60306244090574	1.67176436209256	2.16389014734443	1.97521573211911	0.877173487574394	0.984395496514269	1.58055661918626	1.82160055095334	1.00338008478605
ENSMUSG00000070498	130.471168801505	13.2155601497157	11.0435346123859	84.1964652739052	9.52875412196795	5.77313987989284	6.02250791948265	4.79659629695667	5.19138578480834	15.940653340123	8.01717036607317	3.47962297130302	42.3714371398953	7.24132277979115	2.54754671516322	0.000320247199584593	0.0497803123354278	Tmem132b	5	125608838	125869647	+	8238	protein_coding	transmembrane protein 132B [Source:MGI Symbol;Acc:MGI:3609245]	-	126	12	12	80	7	5	6	5	6	19	9	4	0.616538046799192	0.0644171971223258	0.0532805965653683	0.402094871104926	0.0444187042493452	0.027601558876682	0.0282255518793254	0.0228906606337721	0.0248693322782339	0.0754697266111695	0.0378571848613922
ENSMUSG00000038754	43.4903896005015	34.1401970534321	8.28265095928942	72.6194512987433	51.7275223763975	4.61851190391427	6.02250791948265	11.511831112696	0	5.0338905284599	13.361950610122	1.73981148565151	35.8131205320463	6.27833194273534	2.51577630798182	0.000324422372939883	0.0499580134479481	Elovl3	19	46120336	46124133	+	1975	protein_coding	elongation of very long chain fatty acids (FEN1/Elo2, SUR4/Elo3, yeast)-like 3 [Source:MGI Symbol;Acc:MGI:1195976]	-	42	31	9	69	38	4	6	12	0	6	15	2	0.857222013423079	0.694123838257609	0.166680590318546	1.44657956217218	1.00578725880883	0.0921039562637393	0.117732707028801	0.229152318745537	0	0.0994088646752001	0.263179315517425
ENSMUSG00000060279	1678.52194148602	1697.09818255932	1713.58845402188	1730.23736137875	1783.23827139686	1636.10784196163	1588.93833942351	1363.19266759508	1430.2267837147	1526.94679363284	1358.46497869573	1364.88211049361	1706.46534213408	1438.77527892591	0.246136678089782	0.000329057584101578	0.0502026093818676	Ap2a1	7	44549797	44578920	-	4300	protein_coding	adaptor-related protein complex 2, alpha 1 subunit [Source:MGI Symbol;Acc:MGI:101921]	-	1621	1541	1862	1644	1310	1417	1583	1421	1653	1820	1525	1569	15.1958740056681	15.8480761338415	15.8387477226599	15.8304657243574	15.9254778785382	14.9860365930694	14.266762735369	12.4633770106857	13.1262012998556	13.8498125610468	12.2893519523108
ENSMUSG00000102329	568.481521206555	442.721265015474	340.508983881898	536.752466121146	285.862623659039	438.758630871856	228.855300940341	283.958500779835	305.426530339557	364.1180815586	213.791209761951	172.241337079499	435.514248459328	261.398493409964	0.736808773447991	0.000361179366214205	0.0531352894384951	Gm10851	2	11526517	11535647	+	1685	lncRNA	predicted gene 10851 [Source:MGI Symbol;Acc:MGI:3641824]	-	549	402	370	510	210	380	228	296	353	434	240	198	13.1335933107858	10.5503899949197	8.03177325257352	12.5322948780624	6.51491903156271	10.2557891952428	5.24382175816708	6.62524458648075	7.15334979582155	8.42812149914419	4.93558835035646
ENSMUSG00000114822	4.14194186671443	11.0129667914297	13.8044182654824	1.05245581592382	2.72250117770513	3.4638839279357	0	0	0.865230964134723	0.838981754743317	0	0	6.03302797419853	0.28403545314634	4.23299661345553	0.000370366858962085	1	Gm4813	13	81177222	81178020	-	799	processed_pseudogene	predicted gene 4813 [Source:MGI Symbol;Acc:MGI:3648783]	-	4	10	15	1	2	3	0	0	1	1	0	0	0.201801475238164	0.55347191269683	0.686679528325257	0.0518219265982851	0.130849735600252	0.170749668605336	0	0	0.0427354107860013	0.0409537980253484	0
ENSMUSG00000069094	2288.42288135972	2322.63469631253	1736.59581779768	2303.82578105723	1965.6458503031	2072.55721688153	1790.69235472617	1197.23043572038	1710.56161609435	1813.87855375505	1411.91278113622	1278.76144195386	2114.94704061863	1533.83953056434	0.463425514712535	0.000378856015095821	0.0538138841442572	Pde7a	3	19277272	19365486	-	7748	protein_coding	phosphodiesterase 7A [Source:MGI Symbol;Acc:MGI:1202402]	-	2210	2109	1887	2189	1444	1795	1784	1248	1977	2162	1585	1470	11.4977744889261	12.0373069029196	8.90823999044792	11.6981310869377	9.74242821032555	10.5356233205178	8.92315048927203	6.07484334929443	8.71267911616105	9.13076238426843	7.08871063339235
ENSMUSG00000022462	2625.99114349695	2295.10227933395	2381.72229807122	2679.55250734203	3096.84508963958	2398.16230610748	2016.53640170677	2142.15990622085	2048.00169210689	2011.03926611973	2216.30220786556	2058.19698752574	2579.56260399854	2082.03941025759	0.30863429324884	0.000383237610243502	0.0538444446146245	Slc38a2	15	96585273	96597611	-	8838	protein_coding	solute carrier family 38, member 2 [Source:MGI Symbol;Acc:MGI:1915010]	-	2536	2084	2588	2546	2275	2077	2009	2233	2367	2397	2488	2366	11.5666175724707	10.4276412919449	10.7107503117244	11.9279205103268	13.4560327927115	10.6872973633904	8.80924967245987	9.52894534324883	9.14489920197349	8.87472695627307	9.75492585494096
ENSMUSG00000024924	4156.43866324793	4842.40149819164	4030.89013352085	5267.5413586987	5095.16095407515	3361.12203807361	4030.06154945381	3000.75064337609	3335.46536673936	2589.93667689262	3190.83380569712	2172.15463983591	4458.92577430131	3053.20044699915	0.546422167202637	0.000402914147122246	0.0548662512572995	Vldlr	19	27193884	27231631	+	10068	protein_coding	very low density lipoprotein receptor [Source:MGI Symbol;Acc:MGI:98935]	-	4014	4397	4380	5005	3743	2911	4015	3128	3855	3087	3582	2497	16.0710882539528	19.3132616617227	15.912577214393	20.5835940958392	19.4341814521774	13.1487477143027	15.4545129283085	11.7174645307424	13.0742214794843	10.0330825614716	12.32849231004
ENSMUSG00000006403	119.08082866804	53.9635372780056	114.116524327988	88.4062885376005	88.4812882754167	66.9684226067569	29.1087882774995	33.5761740786967	67.4880152025084	56.2117775678023	43.6490386597317	48.7147215982423	88.5028149489679	46.4580858974135	0.928106947766863	0.000406766984857418	0.0549368820450465	Adamts4	1	171077990	171088206	+	4810	protein_coding	a disintegrin-like and metallopeptidase (reprolysin type) with thrombospondin type 1 motif, 4 [Source:MGI Symbol;Acc:MGI:1339949]	-	115	49	124	84	65	58	29	35	78	67	49	56	0.963748885252533	0.450498520873047	0.942944711688886	0.723093643569751	0.706411748274335	0.548363211539051	0.233650062199397	0.27443094305761	0.553712322454298	0.455796189124943	0.353003163675659
ENSMUSG00000028718	155.322820001791	28.6337136577172	46.93502210264	101.035758328686	61.2562764983654	42.721235111207	18.067523758448	32.6168548193053	39.8006243501973	27.6863979065295	32.0686814642927	12.1786803995606	72.6508042834012	27.0697937830555	1.42472544148218	0.000444916012399706	0.0590602705577475	Stil	4	114857356	114900393	+	5795	protein_coding	Scl/Tal1 interrupting locus [Source:MGI Symbol;Acc:MGI:107477]	-	150	26	51	96	45	37	18	34	46	33	36	14	1.0433954619195	0.198409413535184	0.321903987342259	0.685927361138026	0.405927717300006	0.290357920792612	0.120373820387515	0.221276649464521	0.271043535466556	0.18633801424234	0.215266601475858
ENSMUSG00000030930	1426.89897308312	1534.10627404616	1338.10827720076	1572.36898899018	1174.75925817976	1599.15974673032	1217.55035105541	1070.60029348073	1253.71966703121	1150.24398575309	914.848218439683	970.814808993543	1440.90025303838	1096.29622079228	0.394714704797806	0.000449662815787744	0.0590602705577475	Chst15	7	131837509	131918957	-	6754	protein_coding	carbohydrate sulfotransferase 15 [Source:MGI Symbol;Acc:MGI:1924840]	-	1378	1393	1454	1494	863	1385	1213	1116	1449	1371	1027	1116	8.22430648022188	9.12078935645485	7.87431838232903	9.15903830499445	6.67942953335736	9.32554261789035	6.96005584126008	6.23179629043329	7.32557959326382	6.64228279791374	5.26910655559057
ENSMUSG00000105135	169.819616535292	153.080238400873	92.9497496542479	146.29135841341	103.455044752795	103.916517838071	87.3263648324984	59.4777940822627	97.7710989472237	59.5677045867755	75.7177201240244	84.3808570540982	128.252087599115	77.3735899378138	0.730274538369808	0.000451635254614079	0.0590602705577475	Gm43667	3	34108484	34109578	-	1095	TEC	predicted gene 43667 [Source:MGI Symbol;Acc:MGI:5663804]	-	164	139	101	139	76	90	87	62	113	71	85	97	6.03727354093792	5.61362046539019	3.37378089840608	5.25606848395629	3.62818234912773	3.7377804168675	3.07905972377835	2.13544150916217	3.52370048733854	2.12170594354337	2.68987687016668
ENSMUSG00000039361	5516.03108099694	6298.31570801865	5933.13897050432	6499.96711914548	5457.25361070993	4978.75583241958	4834.06635670474	4769.73535769371	5187.05962998767	4366.06105168422	4514.55771280654	4500.89231338046	5780.57705363249	4695.39540370956	0.300113984558103	0.000458596357200759	0.0593091988312922	Picalm	7	89779421	89862673	+	15732	protein_coding	phosphatidylinositol binding clathrin assembly protein [Source:MGI Symbol;Acc:MGI:2385902]	-	5327	5719	6447	6176	4009	4312	4816	4972	5995	5204	5068	5174	13.6492844269064	16.0760195086564	14.9893690667482	16.2548768572423	13.3211510115404	12.4646534505031	11.8635733555296	11.919479534206	13.0118758798627	10.824162749441	11.1629829765597
ENSMUSG00000039546	4.14194186671443	0	3.68117820412863	6.31473489554289	6.80625294426282	5.77313987989284	0	0	0	0	0	0	4.45287463175694	0	4.73977255857604	0.000461273724392451	1	Ajap1	4	153457678	153567268	-	3048	protein_coding	adherens junction associated protein 1 [Source:MGI Symbol;Acc:MGI:2685419]	-	4	0	4	6	5	5	0	0	0	0	0	0	0.0529000586336264	0	0.0480014823387472	0.0815073215591137	0.0857520823036431	0.0746002762552842	0	0	0	0	0
ENSMUSG00000030889	255.764910269616	185.017842096019	135.283299001727	315.736744777145	254.55386011543	153.565520805149	102.382634631205	100.72852223609	92.5797131624154	199.67765762891	116.694368661732	100.039160424962	216.653696177514	118.683676124219	0.866271420163567	0.000464030100391172	0.0593091988312922	Vwa3a	7	120338541	120404965	+	7205	protein_coding	von Willebrand factor A domain containing 3A [Source:MGI Symbol;Acc:MGI:3041229]	-	247	168	147	300	187	133	102	105	107	238	131	115	1.38189196886459	1.03114006641389	0.746264822025319	1.72404105560152	1.35674195317422	0.839465881734133	0.548629512629008	0.549623665277073	0.507089309413964	1.08089606385792	0.630035331087169
ENSMUSG00000028212	143.932479868326	114.534854630869	116.877407981084	135.766800254172	166.072571840013	131.627589261557	89.333867472326	93.0539681609594	105.558177624436	96.4829017954815	80.1717036607317	99.1692546821361	134.801950639337	93.9616455660118	0.515311870991849	0.000469807982829648	0.0593091988312922	Ccne2	4	11191351	11204779	+	3495	protein_coding	cyclin E2 [Source:MGI Symbol;Acc:MGI:1329034]	-	139	104	127	129	122	114	89	97	122	115	90	114	1.60316692714061	1.31591708318901	1.32912602341915	1.52827977007492	1.82474542587145	1.48334805098576	0.986860590271223	1.0467299824434	1.19192056440568	1.07669234093251	0.89232471784878
ENSMUSG00000056749	146.003450801684	134.358194855442	202.464801227075	244.169749294325	238.218853049199	173.194196396785	118.442655749825	70.9896251949587	129.784644620208	156.889588137	60.5741760992195	95.6896317108331	189.734874270752	105.395053585341	0.846424634105245	0.000494170217076004	0.0601896567024231	Nfil3	13	53121245	53135109	-	2026	protein_coding	nuclear factor, interleukin 3, regulated [Source:MGI Symbol;Acc:MGI:109495]	TF_bZIP	141	122	220	232	175	150	118	74	150	187	68	110	2.80537418544624	2.66294842575822	3.97185019707185	4.74142492086422	4.51531694972983	3.36695422546061	2.25712466050199	1.37753419647335	2.52805477922125	3.02025164084965	1.16304646508688
ENSMUSG00000000093	574.694434006627	588.092426662346	645.126480273542	484.129675324955	432.877687255116	549.602916565798	325.215427652063	352.070168196619	325.326842514656	335.592701897327	408.875688669732	531.512408866536	545.753936681397	379.765539632822	0.523899478944844	0.000494731704413703	0.0601896567024231	Tbx2	11	85723377	85732774	+	3626	protein_coding	T-box 2 [Source:MGI Symbol;Acc:MGI:98494]	T-box	555	534	701	460	318	476	324	367	376	400	459	611	6.16987418553418	6.51262126593231	7.07130937921397	5.2527939608201	4.58446808063752	5.96986550493252	3.46282217446819	3.81723040620366	3.5407454633132	3.6097170019033	4.38644289390391
ENSMUSG00000001036	2483.0941490953	2687.16389710885	3165.81325555062	3100.53483371156	2187.52969628607	2739.93218699714	1880.0262221985	1699.91372764144	2193.36049408152	2216.58979603184	1869.78228870973	2400.93985019908	2727.34466979159	2043.43539647702	0.416672900273847	0.000496801196305731	0.0601896567024231	Epn2	11	61408075	61470513	-	5228	protein_coding	epsin 2 [Source:MGI Symbol;Acc:MGI:1333766]	-	2398	2440	3440	2946	1607	2373	1873	1772	2535	2642	2099	2760	18.4894811667594	20.6393783878583	24.0675833253464	23.3322970946977	16.0682999772929	20.6417994081083	13.8840183155849	12.7831607038025	16.556824561528	16.5362944858442	13.9124768166332
ENSMUSG00000101320	28.993593067001	37.444087090861	50.6162003067687	29.4687628458668	54.4500235541026	38.1027232072927	8.0300105593102	9.59319259391334	12.9784644620208	30.2033431707594	21.3791209761951	20.0078320849924	39.8458983453155	17.0319939745319	1.21420044235387	0.00050177443941287	0.0603484484540574	Gm28529	18	6490143	6496962	+	977	lncRNA	predicted gene 28529 [Source:MGI Symbol;Acc:MGI:5579235]	-	28	34	55	28	40	33	8	10	15	36	24	23	1.15524631628153	1.538957828078	2.05910145835915	1.18665316464364	2.1402034543419	1.53604793999212	0.317328005980051	0.386025101946806	0.524241451658369	1.20572676192541	0.851224807610095
ENSMUSG00000040260	522.920160672697	496.68480229348	674.575905906572	517.808261434517	532.248980241353	554.221428469712	401.50052796551	426.897070429143	383.297317111682	388.448552446156	311.778847569512	508.894859553067	549.743256503055	403.469529179178	0.447122081960893	0.000517725805999649	0.061815710909103	Daam2	17	49763050	49871371	-	9769	protein_coding	dishevelled associated activator of morphogenesis 2 [Source:MGI Symbol;Acc:MGI:1923691]	-	505	451	733	492	391	480	400	445	443	463	350	585	2.08378253278798	2.04159126080858	2.74450158198156	2.08533257459296	2.09226302841331	2.23448025739648	1.58680244570841	1.71798754681035	1.5484182409234	1.55085732215204	1.2414965834198
ENSMUSG00000029554	429.726468671622	418.492738074329	439.900795393371	477.814940429412	288.585124836744	411.04755944837	251.941581298358	300.266928189487	319.270225765713	323.007975576177	326.922391594317	282.71936641837	410.927937808975	300.688078140404	0.452276812656569	0.000522255600694653	0.061907953472272	Mad1l1	5	139994444	140307307	-	3649	protein_coding	MAD1 mitotic arrest deficient 1-like 1 [Source:MGI Symbol;Acc:MGI:1341857]	-	415	380	478	454	212	356	251	313	369	385	367	325	4.5844301292715	4.60523820589234	4.79141351634308	5.15160224330543	3.03704782321945	4.43671496636305	2.66570960956666	3.23504692245643	3.45292515687793	3.45245343369897	3.48513651904481
ENSMUSG00000032786	4470.19075965155	6384.2168489918	6526.72895592006	6348.41348165245	5585.21116606207	6199.19760302893	3700.83111652209	4076.14753315378	4676.57336114818	5050.67016355477	3369.88394387276	5034.14453373264	5918.99313588448	4318.0417753307	0.454927217958822	0.000532278981269274	0.062428333937465	Alas1	9	106110654	106125853	-	6174	protein_coding	aminolevulinic acid synthase 1 [Source:MGI Symbol;Acc:MGI:87989]	-	4317	5797	7092	6032	4103	5369	3687	4249	5405	6020	3783	5787	28.1855522316943	41.5220742734842	42.0157114857067	40.4534012198645	34.7395769087383	39.5468751551074	23.1429912903574	25.9555488019764	29.8926030682493	31.9058875001564	21.2323131134843
ENSMUSG00000121069	1106.93396387943	903.063276897236	1079.50550836072	975.626541361377	1005.96418516205	931.784776614704	613.292056467317	602.452494897757	863.500502206454	692.159947663237	625.339288553707	957.766222851156	1000.47970871259	725.751752106605	0.462864471160889	0.000539665938105641	0.0626202511420187	ENSMUSG00000121069	15	82247110	82252084	+	4975	lncRNA	novel transcript	-	1069	820	1173	927	739	807	611	628	998	825	702	1101	8.66155255510797	7.28891915096902	8.62411516641468	7.71519634961439	7.76499153088046	7.37676322070624	4.75949751723049	4.76076416985074	6.84970895107116	5.42627533936865	4.88958073030665
ENSMUSG00000028996	574.694434006627	661.879304164926	492.357584802204	1116.65562069517	816.750353311539	459.54193443947	226.847798300513	385.646342275316	481.933647023041	481.575527222664	395.51373805961	420.16447378484	686.979871903322	398.613587777664	0.784428238995733	0.000546074137157911	0.0629207241814748	Rbp7	4	149534144	149539435	-	718	protein_coding	retinol binding protein 7, cellular [Source:MGI Symbol;Acc:MGI:1890409]	-	555	601	535	1061	600	398	226	402	557	574	444	483	31.158723950901	37.0162477722987	27.2545463858455	61.1858889032084	43.6834005896664	25.2083268875739	12.1982343970068	21.1160031880245	26.4889908390451	26.159438124197	21.4282211492321
ENSMUSG00000035299	164.642189201899	127.750414780585	90.1888660011515	116.822595567544	119.790051819026	95.8341220062211	62.2325818346541	75.7862214919154	98.6363299113584	51.1778870393424	83.7348904900976	60.8934019978029	119.171373229404	72.0768854608618	0.724915785335781	0.000573534277463047	0.0656258631233238	Mid1	X	168468195	168788732	+	6720	protein_coding	midline 1 [Source:MGI Symbol;Acc:MGI:1100537]	-	159	116	98	111	88	83	62	79	114	61	94	70	0.953759717847159	0.763362957684419	0.533416472489328	0.683933757154063	0.684546622732511	0.561686794290679	0.357548858523728	0.443371658386314	0.579255599234184	0.29703082767224	0.48471468180367
ENSMUSG00000027074	2453.06507056162	3030.76846100146	3492.51782116704	3150.00025705998	2933.49501897728	3977.69337724616	1753.55355588937	1623.16818689014	2701.25107002861	2177.15765355891	1530.38874321263	2840.24225032609	3172.92333433559	2104.29357665096	0.592356972174803	0.000589047924319543	0.0669361562000904	Slc43a3	2	84766923	84788853	+	4464	protein_coding	solute carrier family 43, member 3 [Source:MGI Symbol;Acc:MGI:1931054]	-	2369	2752	3795	2993	2155	3445	1747	1692	3122	2595	1718	3265	21.3920300278075	27.2625584294265	31.095476391659	27.7614959723623	25.2355469304006	35.0954192105706	15.1663718032836	14.2950698841092	23.8804977658251	19.0219107515115	13.3360301152389
ENSMUSG00000047696	57.987186134002	57.2674273154345	42.3335493474792	95.7734792490672	39.4762670767244	43.8758630871856	24.0900316779306	22.0643429660007	28.5526218164459	40.2711242276792	33.8502748789756	20.0078320849924	56.1189620349821	28.1393712753374	0.995574694869896	0.000596436446313699	0.0673115296295261	Ccdc144b	3	36061393	36107696	-	6768	protein_coding	coiled-coil domain containing 144B [Source:MGI Symbol;Acc:MGI:2681852]	-	56	52	46	91	29	38	24	23	33	48	38	23	0.333532993796411	0.339770257516665	0.248603421828866	0.556725836441299	0.223989304343488	0.25533399518298	0.137424406845084	0.128167406410264	0.166490037853797	0.232071522143641	0.194558782797308
ENSMUSG00000020709	1068.62100161232	1241.16135739413	1137.48406507575	1296.62556521814	774.551585057109	1190.4214432339	492.841898077664	635.069349717063	787.360177362598	1094.03220818529	696.603025141024	687.225536832347	1118.14416959856	732.18869921933	0.610698124685894	0.000613761196684952	0.0678234318943449	Adap2	11	80044931	80069784	+	1785	protein_coding	ArfGAP with dual PH domains 2 [Source:MGI Symbol;Acc:MGI:2663075]	-	1032	1127	1236	1232	569	1031	491	662	910	1304	782	790	23.3051875117903	27.9208130891794	25.3273569266481	28.5780651214009	16.6634022817026	26.2667196559009	10.6599765941647	13.9871708283778	17.4075573268312	23.90453688931	15.1808513109575
ENSMUSG00000024524	96.3001484011105	88.1037343314377	39.5726656943828	86.3013769057529	98.0100423973847	103.916517838071	53.1988199554301	47.9659629695667	19.0350812109639	51.1778870393424	36.522665001	52.1943445695453	85.3674142613566	43.3491267909747	0.975731198471261	0.000617437323793879	0.0678234318943449	Gnal	18	67221287	67359863	+	11172	protein_coding	guanine nucleotide binding protein, alpha stimulating, olfactory type [Source:MGI Symbol;Acc:MGI:95774]	-	93	80	43	82	72	90	53	50	22	61	41	60	0.335554560967649	0.316665992298437	0.140782005935498	0.303908788656144	0.336892391228577	0.366350658473856	0.183847581874922	0.168790961601338	0.067239800465121	0.1786651595021	0.127168785499603
ENSMUSG00000031891	56.9517006673234	71.5842841442931	46.93502210264	81.0390978261338	38.1150164878718	49.6490029670784	14.0525184787929	26.8609392629573	38.9353933860625	43.6270512466525	13.361950610122	19.1379263421666	57.3790206992234	25.9959632211256	1.13934992080456	0.000631646767342152	0.0685382822823507	Hsd11b2	8	106245387	106250620	+	1840	protein_coding	hydroxysteroid 11-beta dehydrogenase 2 [Source:MGI Symbol;Acc:MGI:104720]	-	55	65	51	77	28	43	14	28	45	52	15	22	1.20491383550831	1.56220455358206	1.01382261230891	1.73273934244907	0.795481055665447	1.06276202251332	0.294864977295865	0.573918624394392	0.83508244283189	0.924754565411508	0.282488667471149
ENSMUSG00000045038	1086.22425454586	1569.34776777873	1316.02120797599	1549.21496103986	1476.95688890503	1622.25230624989	900.364933962656	990.017475691856	891.187893058765	1146.88805873412	1078.75481259051	1314.42757740972	1436.66956441589	1053.60679190794	0.446864823185692	0.000632264302173776	0.0685382822823507	Prkce	17	86475213	86965347	+	7261	protein_coding	protein kinase C, epsilon [Source:MGI Symbol;Acc:MGI:97599]	-	1049	1425	1430	1472	1085	1405	897	1032	1030	1367	1211	1511	5.82358174742951	8.67882224209879	7.20359389137023	8.39405300732514	7.81129310961939	8.79964762557993	4.78750219103311	5.36035275291687	4.8436800736201	6.16045857025484	5.77930081628714
ENSMUSG00000027263	329.284378403797	249.994346165454	200.62421212501	284.16307029943	321.255138969205	266.719062451049	211.791528501807	183.229978543745	214.577279105411	153.533661118027	170.14217110222	218.346341449265	275.340034735658	191.936826636746	0.519050213492532	0.000646190832856873	0.0693362464413626	Tubgcp4	2	121001135	121029251	+	8395	protein_coding	tubulin, gamma complex associated protein 4 [Source:MGI Symbol;Acc:MGI:1196293]	-	318	227	218	270	236	231	211	191	248	183	191	251	1.52692443214602	1.19576963932772	0.949828974411355	1.33169079512186	1.4695383885483	1.25134387869042	0.974035384883407	0.858070115532907	1.00870841191992	0.713298568894862	0.788388463736833
ENSMUSG00000103847	83.8743228009672	75.989470860865	54.2973785108973	37.8884093732574	73.5075317980385	40.4119791592498	14.0525184787929	43.16936667261	43.2615482067362	25.1694526422995	12.4711539027805	11.3087746567348	60.9948487505459	24.9054690933256	1.29096569106067	0.00066006937366276	0.0701675036763954	Gm20056	16	32227354	32227872	+	519	processed_pseudogene	predicted gene, 20056 [Source:MGI Symbol;Acc:MGI:5012241]	-	81	69	59	36	54	35	14	45	50	30	14	13	6.29113182848688	5.87927938706916	4.15809372444199	2.8720730186379	5.43896213122205	3.06680442039064	1.04537872490249	3.2700565716939	3.28955618670665	1.89144997816494	0.934734498915453
ENSMUSG00000072964	426.620012271586	450.430341769475	458.306686414015	505.178791643431	683.347795603987	430.676235040006	316.181665772839	299.307608930096	348.688078546293	368.312990332316	365.22665001	421.034379527665	492.426643790417	353.125228853202	0.477118324704279	0.000690537740008082	0.072012597101982	Bhlhb9	X	134698343	134791830	+	4800	protein_coding	basic helix-loop-helix domain containing, class B9 [Source:MGI Symbol;Acc:MGI:1917487]	-	412	409	498	480	502	373	315	312	403	439	410	484	3.45992833493234	3.76811749629395	3.7948771899955	4.14057193520298	5.46703825518646	3.53388968648907	2.54321042917684	2.45145240991319	2.86680709726252	2.99270732274359	2.95985348250326
ENSMUSG00000008305	942.291774677533	965.837187608386	1110.79552309581	1082.97703458561	1042.71795106106	1263.16300572055	850.177367966968	623.557518604367	916.279591018672	896.032514065863	611.086541236244	822.060926970339	1067.96374612483	786.532409977075	0.441034278691901	0.000697593249367717	0.072290842577559	Tle1	4	72035379	72119156	-	8711	protein_coding	transducin-like enhancer of split 1 [Source:MGI Symbol;Acc:MGI:104636]	-	910	877	1207	1029	766	1094	847	650	1059	1068	686	945	4.21099284327049	4.45219261945426	5.06814319335843	4.89111298510374	4.59674475251779	5.71129643844703	3.76815167863342	2.81420320274732	4.15109438846033	4.01184552595185	2.72887533485465
ENSMUSG00000048787	649.249387607487	895.354200143235	1006.80223882918	1027.19687634164	929.734152186302	842.878422464354	571.134501030938	475.822352658101	639.405682495561	721.524309079253	407.094095255049	785.524885771657	891.8692129287	600.08430438176	0.571326935508397	0.000710619002983782	0.0728179882783226	Dcun1d3	7	119452019	119495521	-	7838	protein_coding	DCN1, defective in cullin neddylation 1, domain containing 3 (S. cerevisiae) [Source:MGI Symbol;Acc:MGI:2679003]	-	627	813	1094	976	683	730	569	496	739	860	457	903	3.22458185935471	4.58698850922424	5.10530488888557	5.15590483383275	4.55517511881621	4.23548350801372	2.81332552609703	2.38663786938768	3.21939185865184	3.59032824382979	2.02040546655728
ENSMUSG00000022200	1856.62544175474	1969.11846230763	1988.75652478049	1944.93834782721	1766.90326433063	2006.74342225075	1721.43351365212	1573.28358540179	1701.909306453	1695.58212633624	1592.74451272654	1675.4384606824	1922.18091054191	1660.06525087535	0.211972294059304	0.000721111932423419	0.0728179882783226	Golph3	15	12321536	12351677	+	3257	protein_coding	golgi phosphoprotein 3 [Source:MGI Symbol;Acc:MGI:1913879]	-	1793	1788	2161	1848	1298	1738	1715	1640	1967	2021	1788	1926	22.1908355876973	24.2768380761941	24.2687064600961	23.4933280204332	20.83274830987	24.2670736162955	20.4060687388665	18.9904912602803	20.6215480073183	20.3043699789911	19.0229273746123
ENSMUSG00000071604	796.288323875849	724.653214876075	766.605361009787	773.555024704004	788.164090945635	566.922336205476	616.303310427058	498.846014883493	472.416106417559	656.083732209274	560.31112891778	545.430900751748	736.031391936138	558.231865601152	0.399053104034195	0.000725992742576271	0.0728179882783226	Fam189a2	19	23950114	24008383	-	2886	protein_coding	family with sequence similarity 189, member A2 [Source:MGI Symbol;Acc:MGI:2685813]	-	769	658	833	735	579	491	614	520	546	782	629	627	10.7409114892637	10.0825859433492	10.5574320542586	10.5451156353922	10.4874974936113	7.7369637030366	8.24489299944998	6.79543287571224	6.45997709530015	8.86648308198272	7.55234659700645
ENSMUSG00000113491	65.2355844007523	61.6726140320064	53.3770839598651	69.4620838509718	63.9787776760705	64.6591666547998	22.0825290381031	28.77957778174	32.0135456729848	41.9490877371659	48.9938189037805	46.9749101125908	63.0642184290777	36.7989115410608	0.770061653239733	0.000729196338285078	0.0728179882783226	Gm19221	12	70027660	70029242	+	1477	processed_pseudogene	predicted gene, 19221 [Source:MGI Symbol;Acc:MGI:5011406]	-	63	56	58	66	47	56	22	30	37	50	55	54	1.71937726118204	1.67667889381902	1.43633954870905	1.85022171782936	1.66343944515785	1.72422098218848	0.577238334507043	0.766038980234318	0.855373696050479	1.10772121266938	1.29035672074386
ENSMUSG00000026683	217.451948002508	58.3687239945775	63.5003240212189	53.6752466121146	107.538796519353	43.8758630871856	34.1275448770684	28.77957778174	44.9920101350056	25.1694526422995	59.683379391878	27.8369837704242	90.7351503728261	36.7648247664026	1.30309473589411	0.000738118177844952	0.0732648988936823	Nuf2	1	169325503	169359033	-	6341	protein_coding	NUF2, NDC80 kinetochore complex component [Source:MGI Symbol;Acc:MGI:1914227]	-	210	53	69	51	79	38	34	30	52	30	67	32	1.33497356608625	0.369624271991368	0.398016391485041	0.333021871464046	0.651266847565331	0.272528068033182	0.207794545470851	0.178432356695488	0.280014326973156	0.154811944278127	0.366137863910458
ENSMUSG00000032911	1635.03155188552	2314.92561955852	2196.74309331376	1579.73617970165	2069.1008950559	1902.82690441268	1409.26685315894	1601.10384392414	1598.08159075683	1215.68456262307	1362.0281655251	1618.0246816559	1949.727373988	1467.36494960733	0.410026551017335	0.000768640074147695	0.0758376197708477	Cspg4	9	56772317	56807154	+	11931	protein_coding	chondroitin sulfate proteoglycan 4 [Source:MGI Symbol;Acc:MGI:2153093]	-	1579	2102	2387	1501	1520	1648	1404	1669	1847	1449	1529	1860	5.33477870655117	7.79109018884	7.31787848604921	5.20911782309921	6.65972621288218	6.28153459155181	4.56040319783426	5.27581551890694	5.28597021822763	3.97404246229529	4.44076952206651
ENSMUSG00000053930	48.6678169338945	27.5324169785743	21.1667746737396	57.8850698758098	20.4187588327885	39.2573511832713	14.0525184787929	23.9829814847833	4.32615482067362	11.7457445664064	8.90796707341463	19.1379263421666	35.8213647463463	13.6922154610396	1.3945117236623	0.000786736463482581	0.0767044775668786	Shisa6	11	66102551	66416790	-	7449	protein_coding	shisa family member 6 [Source:MGI Symbol;Acc:MGI:2685725]	-	47	25	23	55	15	34	14	25	5	14	10	22	0.254337857417734	0.148417256760896	0.112937841249682	0.305720843651717	0.105264738969595	0.207570837129484	0.0728354890890579	0.126576226541156	0.022919581969402	0.0614994206888908	0.0465189195996701
ENSMUSG00000030789	557.091181073091	455.93682516519	418.734020719632	356.782521598173	430.15518607741	592.324151677005	298.114142014391	294.511012633139	391.084395788895	402.711242276792	296.635303544707	284.459177904022	468.50398105175	327.919212360325	0.51386845334966	0.000791523003968755	0.0767172031552539	Itgax	7	127728719	127749829	+	4803	protein_coding	integrin alpha X [Source:MGI Symbol;Acc:MGI:96609]	-	538	414	455	339	316	513	297	307	452	480	333	327	4.51523973291838	3.81180012728156	3.46504142029295	2.9224523964893	3.43925303386364	4.85724681904612	2.39638637745226	2.4106596513184	3.21336833948424	3.2701646093445	2.40247701204695
ENSMUSG00000030201	2892.11090843335	2917.33490304973	2485.71558233786	3234.19672233388	2992.02879429794	3050.52711253537	2210.26040645013	2157.50901437111	2406.20731125867	2632.72474638453	2556.58655007	2412.24862485582	2928.65233716469	2395.92277556504	0.289224751902778	0.000831140343243473	0.0796203455559459	Lrp6	6	134423439	134543928	-	13672	protein_coding	low density lipoprotein receptor-related protein 6 [Source:MGI Symbol;Acc:MGI:1298218]	-	2793	2649	2701	3073	2198	2642	2202	2249	2781	3138	2870	2773	8.23474226067536	8.56825285466931	7.22606984298424	9.30659563844262	8.40398505561126	8.78792127315642	6.24163321914503	6.20393895428587	6.94550137063341	7.51037898951369	7.27406941282253
ENSMUSG00000006764	2557.64910269616	1843.57064088533	1050.05608272769	890.377620271548	1112.14173109255	1536.80983602747	350.309210649908	415.385239316447	1049.52515949542	515.97377916714	66.8097530506098	132.225672909515	1498.43416895013	421.704802431506	1.82908966824239	0.000864089479956654	0.0822982795447734	Tph2	10	114914546	115020927	-	2879	protein_coding	tryptophan hydroxylase 2 [Source:MGI Symbol;Acc:MGI:2651811]	-	2470	1674	1141	846	817	1331	349	433	1213	615	75	152	34.5832984913837	25.7132015804703	14.4961808987721	12.1671547661748	14.8344013467071	21.0243116038032	4.69782399196926	5.67226277015209	14.3864552182884	6.98995555494471	0.902707794628195
ENSMUSG00000031342	605.758998006985	509.900362443196	521.807010435233	614.634196499508	530.8877296525	605.025059412769	364.3617291287	484.456225992623	404.062860250916	368.312990332316	447.179947085415	517.593916981324	564.668892741699	430.994611628549	0.389769878887867	0.0008815252480931	0.0831646032707262	Gpm6b	X	165021907	165171984	+	5600	protein_coding	glycoprotein m6b [Source:MGI Symbol;Acc:MGI:107672]	-	585	463	567	584	390	524	363	505	467	439	502	595	4.21093913162708	3.65624533870227	3.70343436614019	4.31802501814025	3.64054340271381	4.25528501505999	2.51206907698284	3.40105348078616	2.84749857728804	2.56517770520879	3.10629919487799
ENSMUSG00000056367	142.896994401648	168.498391908875	150.928306369274	157.868372388572	126.596304763289	158.184032709064	98.36762935155	122.792865202091	119.401873050592	105.711701097658	84.625687197439	120.046992509954	150.828733756787	108.491124734881	0.476930622695572	0.000883280061441833	0.0831646032707262	Actr3b	5	25964995	26055686	+	2425	protein_coding	ARP3 actin-related protein 3B [Source:MGI Symbol;Acc:MGI:2661120]	-	138	153	164	150	93	137	98	128	138	126	95	138	2.29392105801139	2.7901146767608	2.47366979171487	2.5611785166204	2.00475284603051	2.56917814083106	1.56612820930752	1.99071155253855	1.94313066560251	1.70019903604286	1.35749880615689
ENSMUSG00000073568	106.655003067897	69.3816907860072	30.3697201840612	81.0390978261338	40.8375176655769	78.5147023665426	38.1425501567235	36.4541318568707	35.4744695295237	36.0762154539627	22.2699176835366	9.56896317108331	67.799621982703	29.6643746419501	1.19520279364164	0.000909272385822275	0.0851254608022365	Arl14epl	18	47054882	47067299	+	2257	protein_coding	ADP-ribosylation factor-like 14 effector protein-like [Source:MGI Symbol;Acc:MGI:2685795]	-	103	63	33	77	30	68	38	38	41	43	25	11	1.83957199907789	1.23438704782545	0.534800742086901	1.41260097036167	0.694831227810822	1.37013306670582	0.652476714112504	0.634983071992783	0.620278831164651	0.623415878935266	0.383827461340211
ENSMUSG00000009112	2533.83293696255	2858.96617905515	2631.12212140094	2801.6373819892	3204.38388615894	2476.67700847403	2320.67305164065	1951.25537360197	2560.21842287465	2266.92870131644	2109.40660298459	1986.86471661402	2751.10325234013	2199.22447817205	0.322657181709832	0.000930740991203464	0.086643046960788	Bcl2l13	6	120813173	120869803	+	9089	protein_coding	BCL2-like 13 (apoptosis facilitator) [Source:MGI Symbol;Acc:MGI:2136959]	-	2447	2596	2859	2662	2354	2145	2312	2034	2959	2702	2368	2284	10.8524799129806	12.6308026757995	11.5055576368067	12.1269694042363	13.5387942460552	10.7323934898448	9.8579067523914	8.44004875168365	11.1163835770829	9.72770080859595	9.02803405443865
ENSMUSG00000081712	5.17742733339304	4.40518671657188	7.36235640825726	11.577013975162	9.52875412196795	3.4638839279357	0	0	0.865230964134723	1.67796350948663	0	2.60971722847726	6.91910374721463	0.858818617016437	2.96296970083807	0.000931792183322436	1	Gm12096	11	30478295	30479401	+	829	processed_pseudogene	predicted gene 12096 [Source:MGI Symbol;Acc:MGI:3651583]	-	5	4	8	11	7	3	0	0	1	2	0	3	0.243123309281202	0.213377108923892	0.352975918379979	0.549412440135498	0.441400827027872	0.16457054911419	0	0	0.0411888941109953	0.0789435093419864	0
ENSMUSG00000027379	201.919666002328	48.4570538822907	41.4132547964471	91.5636559853719	80.3137847423013	36.9480952313141	33.1237935571546	54.681197785306	42.3963172426014	17.6186168496097	23.160714390878	18.2680205993409	83.4359184400089	31.5414434041484	1.40618223283389	0.000942764146025314	0.0868507392415645	Bub1	2	127643036	127673785	-	4360	protein_coding	BUB1, mitotic checkpoint serine/threonine kinase [Source:MGI Symbol;Acc:MGI:1100510]	-	195	44	45	87	59	32	33	57	49	21	26	21	1.80284855788315	0.446281159696554	0.377516245274229	0.826215042116191	0.707383874533428	0.333771217653	0.293319158279898	0.493058529869625	0.383746345798793	0.157606370887	0.206640028315287
ENSMUSG00000086765	32.1000494670368	33.0389003742891	54.2973785108973	58.9375256917337	74.8687823868911	68.1230505827355	8.0300105593102	7.67455407513067	25.091697959907	15.1016715853797	6.23557695139024	48.7147215982423	53.5609478355972	18.4747054548933	1.52806155891195	0.000948785158917376	0.0868507392415645	Gm11827	4	11122805	11126998	+	1423	lncRNA	predicted gene 11827 [Source:MGI Symbol;Acc:MGI:3649801]	-	31	30	59	56	55	59	8	8	29	18	7	56	0.878148408322926	0.93230651773317	1.51654999507055	1.62945908904685	2.02044681340586	1.88552591420102	0.217870317528117	0.212028966747451	0.695869433114854	0.413912525088237	0.170459313048883
ENSMUSG00000031938	4013.54166884628	5023.01415357109	3585.46757082129	5458.03586138091	3898.62168647375	3579.34672553356	3069.47153629632	3470.81708047784	3623.58727779622	3051.37664200145	3121.35166252449	2471.40221536797	4259.67127777114	3134.66773574405	0.442475249739796	0.000959369196109848	0.0868545398038569	4931406C07Rik	9	15194633	15217744	-	10871	protein_coding	RIKEN cDNA 4931406C07 gene [Source:MGI Symbol;Acc:MGI:1918234]	-	3876	4561	3896	5186	2864	3100	3058	3618	4188	3637	3504	2841	14.3722709939398	18.5538030508176	13.1086833498409	19.7525582337988	13.771877498139	12.9681370670763	10.9013671041578	12.551891509614	13.1544241005471	10.9474953335604	11.1692032938202
ENSMUSG00000071350	191.564811335542	193.828215529163	150.008011818242	159.97328402042	175.601325961981	204.369151748206	116.435153109998	146.775846686874	147.954494867038	104.033737588171	132.728709393878	129.615955681037	179.224133402259	129.590649554499	0.466502547707525	0.000994490320247967	0.088434706565773	Setdb2	14	59639458	59678333	-	4047	protein_coding	SET domain, bifurcated 2 [Source:MGI Symbol;Acc:MGI:2685139]	MBD	185	176	163	152	129	177	116	153	171	124	149	149	1.84267884002528	1.92318839266318	1.47320783675968	1.55514438880863	1.66627293032538	1.98895728384585	1.11080484228228	1.42583193140871	1.44277154442317	1.00260402598454	1.27579430152195
ENSMUSG00000020808	201.919666002328	77.090767540008	126.080353491406	86.3013769057529	125.235054174436	60.0406547508855	22.0825290381031	76.7455407513067	70.0837080949126	27.6863979065295	61.464972806561	51.3244388267196	112.777978810803	51.5645979040221	1.12936861979226	0.00100407717899091	0.088434706565773	Pimreg	11	71932858	71938196	+	2529	protein_coding	PICALM interacting mitotic regulator [Source:MGI Symbol;Acc:MGI:1924434]	-	195	70	137	82	92	52	22	80	81	33	69	59	3.10811376527108	1.22402863096614	1.98144197203289	1.34253419804921	1.90164143228615	0.935060924108939	0.337121795202413	1.19302973381425	1.09363109950938	0.426978565652179	0.945426683066748
ENSMUSG00000108081	19.6742238668935	8.81037343314377	1.84058910206432	16.839293054781	5.44500235541026	5.77313987989284	0	0	0	4.19490877371659	1.78159341468293	0	9.73043694869763	0.996083698066586	3.25140362983441	0.00100506137706185	1	Gm44026	6	54440670	54450155	-	2088	lncRNA	predicted gene, 44026 [Source:MGI Symbol;Acc:MGI:5690418]	-	19	8	2	16	4	5	0	0	0	5	2	0	0.366804142192358	0.169434505074623	0.0350355646955224	0.31728520576268	0.10014266163276	0.108899253843921	0	0	0	0.0783574823329822	0.0331915164844773
ENSMUSG00000045180	461.826518138659	286.337136577172	324.863976514352	373.621814652954	136.125058885256	264.409806499092	115.431401790084	109.362395570612	207.655431392334	192.965803590963	210.228022932585	193.119074907318	307.864051877914	171.460355030649	0.845000740208472	0.00100864263048205	0.088434706565773	Shroom2	X	151392505	151552461	-	8375	protein_coding	shroom family member 2 [Source:MGI Symbol;Acc:MGI:107194]	-	446	260	353	355	100	229	115	114	240	230	236	222	2.14664963901555	1.37287468828226	1.54169871383525	1.75510810387708	0.624172768624487	1.2434721438562	0.532140121072965	0.51336959766724	0.978500581769984	0.898636353805167	0.976460728061069
ENSMUSG00000029174	698.95269000806	713.640248084645	635.923534763221	835.649917843509	1860.82955496146	542.675148709927	561.0969878318	487.334183770797	474.146568345828	453.889129316135	581.690249893976	442.782023098309	881.27851572847	500.156523709474	0.816298543780601	0.00101235286582426	0.088434706565773	Tbc1d1	5	64313648	64508829	+	7405	protein_coding	TBC1 domain family, member 1 [Source:MGI Symbol;Acc:MGI:1889508]	-	675	648	691	794	1367	470	559	508	548	541	653	509	3.67442878571313	3.86983375749641	3.41320682155417	4.43972196698334	9.6501282419899	2.88641112092559	2.92549745391565	2.58731174203688	2.5269122327444	2.39063440656841	3.05573516758888
ENSMUSG00000027469	574.694434006627	207.043775678879	199.703917573978	215.753442264382	245.025105993462	130.472961285578	79.2963542731882	128.548780758439	185.159426324831	81.3812302101018	182.613325005	65.2429307119316	262.115606133818	120.373674547249	1.12282142656923	0.00102277200859176	0.088434706565773	Tpx2	2	152689884	152737241	+	4677	protein_coding	TPX2, microtubule-associated [Source:MGI Symbol;Acc:MGI:1919369]	-	555	188	217	205	180	113	79	134	214	97	205	75	4.783400426929	1.77759510263024	1.69707870657285	1.81487544733079	2.01184615929317	1.09874387637161	0.654595025806026	1.08055664521428	1.56235983507702	0.678649178609916	1.5188472007714
ENSMUSG00000044285	255.764910269616	370.035684192038	421.494904372728	302.054819170135	397.485171944949	382.181860048906	264.990348457237	267.650073370182	261.299751168686	252.533508177739	190.630495371073	281.849460675545	354.836224999729	253.158939536744	0.486732394676639	0.0010252735303286	0.088434706565773	Ubb-ps	14	46321483	46322457	+	975	transcribed_processed_pseudogene	ubiquitin B, pseudogene [Source:MGI Symbol;Acc:MGI:3037679]	-	247	336	458	287	292	331	264	279	302	301	214	324	10.2118273186352	15.2397213918197	17.1818721336343	12.188145081059	15.6555333914993	15.4386304637213	10.4933048623619	10.7921928578427	10.5763786172724	10.1018948423572	7.60565727886767
ENSMUSG00000022307	1712.69296188642	1669.56576558074	1738.43640689975	1757.60121259277	1689.31198076603	1647.65412172142	1588.93833942351	1417.87386538039	1537.5154232674	1475.7689065935	1432.40110540507	1482.31938577509	1702.54374157452	1489.13617097416	0.193611165922727	0.00104001688946049	0.088434706565773	Oxr1	15	41310878	41724444	+	7136	protein_coding	oxidation resistance 1 [Source:MGI Symbol;Acc:MGI:2179326]	-	1654	1516	1889	1670	1241	1427	1583	1478	1777	1759	1608	1704	9.34311702617346	9.3947824032941	9.68248286225823	9.68995954566841	9.09089356656745	9.09399112027056	8.59684413706371	7.81141484531669	8.50290346810717	8.06588380753135	7.80834146319356
ENSMUSG00000036502	83.8743228009672	61.6726140320064	75.4641531846369	68.409628035048	42.1987682544295	35.7934672553356	24.0900316779306	30.6982163005227	28.5526218164459	40.2711242276792	27.6146979275854	46.9749101125908	61.2354922604039	33.0336003437924	0.893679529403128	0.00104112898656696	0.088434706565773	Tmem255a	X	37285450	37341316	-	4490	protein_coding	transmembrane protein 255A [Source:MGI Symbol;Acc:MGI:3045722]	-	81	56	82	65	31	31	24	32	33	48	31	54	0.72719318908345	0.551548936786346	0.668001029499839	0.599414645408004	0.360915044663992	0.313979104802196	0.20714663374778	0.268790396152894	0.250958702938641	0.349812931373755	0.239245042205707
ENSMUSG00000002103	1295.39231881494	1397.54548583243	1435.65949961017	1417.65798404938	1308.16181588731	1402.87299081396	1179.40780089869	1120.48489496908	1324.66860609026	1049.56617518389	1136.65659856771	1121.3085025024	1376.2150158347	1155.34876303534	0.252771270620597	0.00104987868688844	0.088434706565773	Acp2	2	91033230	91044443	+	5186	protein_coding	acid phosphatase 2, lysosomal [Source:MGI Symbol;Acc:MGI:87882]	-	1251	1269	1560	1347	961	1215	1175	1168	1531	1251	1276	1289	9.72379785831238	10.8211016180603	11.0027616825522	10.7546286091755	9.68680390797938	10.6544039746132	8.78048152875408	8.4941600604545	10.0803901305016	7.89342997733108	8.52600839485104
ENSMUSG00000092074	133.57762520154	98.0154044437244	101.232400613537	128.399609542705	58.5337753206603	68.1230505827355	68.2550897541367	57.55915556348	72.6794009873168	45.3050147561391	35.6318682936585	53.9341560551968	97.9803109508172	55.5607809016547	0.824317697588413	0.00105089290474868	0.088434706565773	Dynlt1a	17	6356615	6367775	-	4267	protein_coding	dynein light chain Tctex-type 1A [Source:MGI Symbol;Acc:MGI:3807506]	-	129	89	110	122	43	59	68	60	84	54	40	62	1.21864775335557	0.922379685582008	0.942930454566156	1.18385229926122	0.526787481370737	0.628803228476226	0.61758856940739	0.530320868903721	0.672188851725631	0.414106531427627	0.324836589733249
ENSMUSG00000079112	6.21291280007164	5.50648339571485	1.84058910206432	5.26227907961908	5.44500235541026	24.2471874955499	0	0	1.73046192826945	0	1.78159341468293	1.73981148565151	8.08574237140501	0.875311138100647	3.17617690759782	0.0010572062961284	1	Fam90a1a	8	22448730	22454319	+	1887	protein_coding	family with sequence similarity 90, member A1A [Source:MGI Symbol;Acc:MGI:2142877]	-	6	5	2	5	4	21	0	0	2	0	2	2	0.128171207245861	0.117176486021401	0.0387674928904349	0.109713087843216	0.110809686003817	0.506095864605006	0	0	0.03619034787283	0	0.0367270198302006
ENSMUSG00000026003	6548.41009127551	7634.18857981908	6211.06792491603	8215.4700991013	10593.2520824507	5446.3801626909	5490.51971992835	5398.08947259503	5941.54103071314	5148.83102885974	5410.69920039205	4677.48317917409	7441.46149004225	5344.52727194373	0.477395997191765	0.00106269781513765	0.088434706565773	Acadl	1	66869998	66902436	-	2005	protein_coding	acyl-Coenzyme A dehydrogenase, long-chain [Source:MGI Symbol;Acc:MGI:87866]	-	6324	6932	6749	7806	7782	4717	5470	5627	6867	6137	6074	5377	127.141874188967	152.892627020086	123.121719341548	161.203513846356	202.892728506357	106.988449420164	105.727004755519	105.845560794794	116.94652799407	100.157323354997	104.97551274628
ENSMUSG00000027765	273.368163203152	258.804719598598	204.305390329139	235.750102766935	259.99886247084	242.471874955499	209.784025861979	204.335002250354	171.315730898675	194.64376710045	177.268544760951	149.62378776603	245.783185554027	184.495143106406	0.413524143806168	0.0010877069291715	0.0900610405626067	P2ry1	3	60910216	60916403	+	4291	protein_coding	purinergic receptor P2Y, G-protein coupled 1 [Source:MGI Symbol;Acc:MGI:105049]	-	264	235	222	224	191	210	209	213	198	232	199	172	2.48002773134686	2.42187494028246	1.89236139789136	2.16147311462472	2.32682909580738	2.22559519112013	1.88755993722572	1.87210929247803	1.57558318740783	1.76917353352663	1.60702323438571
ENSMUSG00000031209	2732.64614656484	2997.72956062717	2645.84683421745	2511.15957679422	2388.99478343625	2782.65342210835	2496.32953262556	2009.77384842484	2442.54701175232	1956.50545206142	1838.60440395278	2028.62019226966	2676.50505395805	2128.73007351443	0.330620233513671	0.00110598334153414	0.0906631219823785	Heph	X	95498965	95618091	+	7662	protein_coding	hephaestin [Source:MGI Symbol;Acc:MGI:1332240]	-	2639	2722	2875	2386	1755	2410	2487	2095	2823	2332	2064	2332	13.8838005882818	15.7104396572991	13.7247777908654	12.8940285009062	11.9735961561456	14.3040918110915	12.5790144805913	10.3122157275026	12.5806590517432	9.95926668482053	9.33458767750136
ENSMUSG00000036273	389.342535471156	464.747198598334	454.625508209886	406.247944946593	480.521457864955	426.057723136091	334.249189531287	282.039862261052	384.162548075817	343.98251944476	283.273352934585	386.238149814635	436.923728037836	335.657603677023	0.378911673701201	0.00113059095793343	0.0919351110537328	Lrrk2	15	91557378	91700323	+	11834	protein_coding	leucine-rich repeat kinase 2 [Source:MGI Symbol;Acc:MGI:1913975]	-	376	422	494	386	353	369	333	294	444	410	318	444	1.28075896562765	1.5769693474674	1.52688034424623	1.35056681340912	1.55931111107167	1.41801294418849	1.09049994500545	0.936970409269871	1.28110895629531	1.13368723129321	0.931157507243078
ENSMUSG00000011305	333.426320270512	485.67183550205	464.74874827124	362.044800677792	947.430409841385	227.461711267778	202.757766622583	208.172279287919	255.243134419743	253.372489932482	314.451237691537	302.727198503363	470.130637638459	256.120684409604	0.874560408654133	0.00113694352629124	0.0919351110537328	Plin5	17	56418601	56424596	-	2087	protein_coding	perilipin 5 [Source:MGI Symbol;Acc:MGI:1914218]	-	322	441	505	344	696	197	202	217	295	302	353	348	6.21934354891285	9.34455245260864	8.85071893568438	6.82490055443136	17.4331723445718	4.29268648578275	3.7509553960342	3.92145643692575	4.82652132214396	4.73505968180188	5.86110970438782
ENSMUSG00000069607	26.9226221336438	5.50648339571485	11.0435346123859	7.36719071146671	8.16750353311539	5.77313987989284	4.0150052796551	0	0.865230964134723	3.35592701897327	2.67239012202439	2.60971722847726	10.7967457110366	2.25304510221079	2.26805332645978	0.00116332030068331	1	Cd300ld3	11	114932957	114939235	-	852	protein_coding	CD300 molecule like family member D3 [Source:MGI Symbol;Acc:MGI:2687214]	-	26	5	12	7	6	5	4	0	1	4	3	3	1.2301126310439	0.259521160941765	0.515170838621484	0.340187835051888	0.368130066002118	0.266879861532989	0.181942172442788	0	0.0400769873450881	0.153624810433114	0.122013884541529
ENSMUSG00000001517	449.400692538516	190.524325491734	160.131251879595	217.85835389623	277.695120125923	90.0609821263282	75.2813489935331	121.833545942699	192.081274037909	69.6354856436953	117.585165369073	58.2836847693256	230.945121009721	105.783417459373	1.1261346361539	0.00116916789834976	0.0933040900511055	Foxm1	6	128339930	128353109	+	5754	protein_coding	forkhead box M1 [Source:MGI Symbol;Acc:MGI:1347487]	Fork_head	434	173	174	207	204	78	75	127	222	83	132	67	3.04040191008156	1.32959266729831	1.1060862948088	1.48956967429096	1.85331799651536	0.616467434064522	0.505131422449345	0.832422812381955	1.31740036399015	0.472007824756175	0.794935089275781
ENSMUSG00000028494	10561.9517601218	11851.0535642575	8553.21755729287	8810.10763509826	9142.15895473383	8293.69275145405	6182.10437934894	7335.91437656553	8894.57431130496	7936.76739987178	5950.52200504098	5168.97992387064	9535.36370382639	6911.47706600047	0.464275233089683	0.00118887027994559	0.09417795962819	Plin2	4	86566623	86588297	-	3512	protein_coding	perilipin 2 [Source:MGI Symbol;Acc:MGI:87920]	-	10200	10761	9294	8371	6716	7183	6159	7647	10280	9460	6680	5942	117.073011310933	135.500372744076	96.7960825639274	98.6922769635083	99.9645035035229	93.0115224757131	67.9623951981784	82.1195749895136	99.9478070276751	88.1409227011723	65.9097325288798
ENSMUSG00000027803	5239.55646139375	5693.70383116916	5773.00771862472	5401.20324732102	4473.06943496953	5419.82371924339	4000.95276117631	4260.33683095691	4933.54695749619	4549.79805597301	4496.74177865971	3778.00064109225	5333.39406878693	4336.56283755906	0.298645049826104	0.00120539009734009	0.0945772030184416	Wwtr1	3	57363070	57483331	-	4779	protein_coding	WW domain containing transcription regulator 1 [Source:MGI Symbol;Acc:MGI:1917649]	-	5060	5170	6273	5132	3286	4694	3986	4441	5702	5423	5048	4343	42.6800196850484	47.8405185420683	48.0117877417351	44.4641455774465	35.9434832302533	44.6674797100039	32.3231176737875	35.047242430584	40.7403583446583	37.1315892250429	36.6024292368783
ENSMUSG00000062127	851.169053609815	707.032468009787	912.9321946239	743.033806042214	656.122783826936	846.34230639229	576.153257630507	573.672917116018	642.001375387965	634.270206585948	607.523354406878	696.79450000343	786.105435417491	621.735935188457	0.339342649673792	0.00122999518749177	0.0950877992811954	Cttnbp2nl	3	104909231	104960462	-	8138	protein_coding	CTTNBP2 N-terminal like [Source:MGI Symbol;Acc:MGI:1933137]	-	822	642	992	706	482	733	574	598	742	756	682	801	4.07160141631762	3.48866853518236	4.45865231086119	3.59209116030143	3.09612856198685	4.09611068088316	2.73342515202754	2.77136423828967	3.11329935706159	3.03980043922629	2.90398442726465
ENSMUSG00000034903	1950.8546192225	1828.15248737733	1978.63328471914	2175.42617151453	1392.55935239617	2058.70168116978	1334.98925548532	1270.13869943413	1491.65818216826	1557.98911855834	1488.52129796759	1643.25194819785	1897.38793273324	1464.42475030191	0.373996037527846	0.00124401149376418	0.095337569222104	Cobll1	2	64918683	65069747	-	8342	protein_coding	Cobl-like 1 [Source:MGI Symbol;Acc:MGI:2442894]	-	1884	1660	2150	2067	1023	1783	1330	1324	1724	1857	1671	1889	9.10378175196633	8.79995129089323	9.42709524281581	10.2596046392526	6.41054689137662	9.72000641890548	6.17866195532454	5.98587866906122	7.0567013555332	7.28421375491783	6.94118881605925
ENSMUSG00000021823	2147.59685789143	2233.42966530195	2424.0558474187	2258.57018097251	2692.55366475037	2455.89370490641	2149.03157593539	1986.75018619945	1851.59426324831	1770.2515025084	2023.8901190798	2032.96972098379	2368.6833202069	1969.08122799252	0.266348006069096	0.00127683830120956	0.0960660488083556	Vcl	14	20979466	21083744	+	8191	protein_coding	vinculin [Source:MGI Symbol;Acc:MGI:98927]	-	2074	2028	2634	2146	1978	2127	2141	2071	2140	2110	2272	2337	10.2066436166377	10.9489731427223	11.7621974379146	10.8480861591327	12.6234770380187	11.8090770989996	10.1296099042366	9.53571544928339	8.92095830625714	8.42920260688007	9.61167317453945
ENSMUSG00000048911	553.984724673055	513.204252480625	453.705213658854	604.10963834027	534.971481419058	452.614166583598	475.778125639129	345.35493338088	414.445631820532	374.18586261552	430.254809645927	335.783616730741	518.764912859243	395.967163305455	0.389976453642346	0.00132424185346701	0.0979124241952349	Rnf24	2	131139984	131194812	-	6801	protein_coding	ring finger protein 24 [Source:MGI Symbol;Acc:MGI:1261771]	-	535	466	493	574	393	392	474	360	479	446	483	386	3.17096999017358	3.030089856522	2.65145197239638	3.49461592531467	3.02071261039762	2.62119110937314	2.70096244878234	1.99636448840951	2.40490209549025	2.14586821666299	2.46094523898407
ENSMUSG00000025473	581.942832273377	569.370383116916	498.799646659429	212.596074816611	620.73026851677	592.324151677005	171.641475705256	222.562068178789	543.365045476606	271.830088536835	115.80357195439	187.029734707537	512.627226176685	252.038664093236	1.02351496982541	0.00132514842480654	0.0979124241952349	Adam8	7	139558845	139572475	-	4638	protein_coding	a disintegrin and metallopeptidase domain 8 [Source:MGI Symbol;Acc:MGI:107825]	-	562	517	542	202	456	513	171	232	628	324	130	215	4.8844615587535	4.929491981728	4.27442954114531	1.80335388294739	5.13953385807873	5.03004667354	1.42882271386021	1.88654578929864	4.62342228135262	2.28588948202029	0.971270508252104
ENSMUSG00000031613	907.08526881046	1096.8914924264	1237.79617113825	1394.50395609906	661.567786182346	869.434865911861	386.444258166803	463.351202286014	587.491824647477	931.269747765082	421.346842572512	855.987250940543	1027.87992342806	607.648521063072	0.758337443188724	0.00134103568796346	0.0986439510293482	Hpgd	8	56747620	56774078	+	1683	protein_coding	hydroxyprostaglandin dehydrogenase 15 (NAD) [Source:MGI Symbol;Acc:MGI:108085]	-	876	996	1345	1325	486	753	385	483	679	1110	473	984	20.9812382285498	26.1708355324889	29.2312770256438	32.5980856455374	15.0953013160655	20.3468064700723	8.86522153961426	10.8236346632668	13.7759107516531	21.581410535176	9.73878142497487
ENSMUSG00000041406	126.32922693479	47.3557572031478	43.2538438985114	54.7277024280384	32.6700141324616	21.9379315435928	15.0562697987066	23.9829814847833	20.7655431392334	16.7796350948664	36.522665001	22.6175493134696	54.379079356757	22.6207739720099	1.26836228304848	0.00135373411554723	0.0986968009817333	BC055324	1	163773562	163822365	-	4148	protein_coding	cDNA sequence BC055324 [Source:MGI Symbol;Acc:MGI:3590554]	-	122	43	47	52	24	19	15	25	24	20	41	26	1.18558366702422	0.458428989983727	0.414446742642211	0.519068805763151	0.302455946223534	0.208305265115527	0.140141089911935	0.227306246746642	0.19756370232217	0.157772828458309	0.342509564031236
ENSMUSG00000024660	528.09758800609	243.386566090597	247.55923422765	279.953247035735	285.862623659039	250.554270787349	185.693994184048	225.440025956963	233.612360316375	160.245515155974	202.210852566512	152.233504994507	305.902254967743	193.239375529063	0.663433592583715	0.00136531635863495	0.0991027208864673	Incenp	19	9849660	9876915	-	4329	protein_coding	inner centromere protein [Source:MGI Symbol;Acc:MGI:1313288]	-	510	221	269	266	210	217	185	235	270	191	227	175	4.74890755051973	2.25760029734566	2.27286852548665	2.5442183755232	2.53583704508736	2.27959419356272	1.65614028762025	2.04734195614407	2.12966277867038	1.44373253935098	1.81704576313775
ENSMUSG00000034906	393.484477337871	158.586721796588	175.776259247142	215.753442264382	202.826337739032	110.844285693942	76.2851003134469	114.158991867569	145.358801974634	96.4829017954815	156.780220492098	95.6896317108331	209.54525401316	114.12594135901	0.876684137030451	0.00138198338722346	0.0998725450494776	Ncaph	2	126945729	126975874	-	4307	protein_coding	non-SMC condensin I complex, subunit H [Source:MGI Symbol;Acc:MGI:2444777]	-	380	144	191	205	149	96	76	119	168	115	176	110	3.55647573205314	1.4785294726549	1.62206448631204	1.97078534180778	1.80842719676639	1.0136353672861	0.68383559031898	1.04203474408269	1.33189218960449	0.873703211413777	1.41600696654836
ENSMUSG00000029426	3930.70283151199	3920.61617774898	4444.10238693429	4016.17139356528	3899.9829370626	3961.52858558246	3188.91794336606	2912.49327151209	3615.80019911901	3788.00262266608	3196.17858594117	3462.2248564465	4028.85071873427	3360.60291317515	0.261631379455036	0.0013916754816739	0.100133785639917	Scarb2	5	92589173	92654692	-	6285	protein_coding	scavenger receptor class B, member 2 [Source:MGI Symbol;Acc:MGI:1196458]	-	3796	3560	4829	3816	2865	3431	3177	3036	4179	4515	3588	3980	24.3462482737969	25.0488090270703	28.1035733586195	25.1398926089651	23.8291733892827	24.8256615367246	19.5895704111705	18.2182473936637	22.70396723279	23.5067958742202	19.7822071975723
ENSMUSG00000020649	474.252343738802	162.99190851316	141.725360858952	133.661888622325	250.470108348872	113.1535416459	55.2063225952576	91.1353296421767	160.932959329059	93.1269747765082	123.820742320463	74.8118938830149	212.709191954668	99.8390370910799	1.0901875176196	0.00143069462897801	0.102050023383856	Rrm2	12	24758240	24764145	+	2771	protein_coding	ribonucleotide reductase M2 [Source:MGI Symbol;Acc:MGI:98181]	-	458	148	154	127	184	98	55	95	186	111	139	86	6.66254379751032	2.3619328986007	2.03279608426103	1.8976998764734	3.47113040942019	1.60832918935824	0.769199765488003	1.29299602443857	2.29198135638788	1.31077278710578	1.73822450601278
ENSMUSG00000022041	84.9098082676458	70.4829874651501	71.7829749805083	113.665228119772	66.7012788537757	35.7934672553356	52.1950686355163	49.8846014883493	21.6307741033681	35.2372336992193	40.0858518303659	13.9184918852121	73.8892908236979	35.4920036070052	1.06382072749544	0.00146922245853979	0.103436474860974	Chrna2	14	66372488	66390397	+	3787	protein_coding	cholinergic receptor, nicotinic, alpha polypeptide 2 (neuronal) [Source:MGI Symbol;Acc:MGI:87886]	-	82	64	78	108	49	31	52	52	25	42	45	16	0.872830014170455	0.747355155206366	0.753371033611243	1.18083382361215	0.676379455833837	0.37226463706413	0.532134011612441	0.517866894093095	0.225413211103876	0.36290666863867	0.411760613794757
ENSMUSG00000002944	83452.880216029	97208.1539779126	90760.3689173424	93977.9896271012	73549.7305662929	79110.4904021475	72422.6652344187	66669.8105699195	82943.635914847	67989.403440889	59116.8326860089	59393.6844971712	86343.2689511376	68089.3387238757	0.342664316003842	0.00150484903449976	0.105013588888091	Cd36	5	17986688	18093799	-	3590	protein_coding	CD36 molecule [Source:MGI Symbol;Acc:MGI:107899]	-	80593	88267	98621	89294	54031	68516	72152	69497	95863	81038	66364	68276	904.927942117106	1087.29222699417	1004.81144639943	1029.88365008918	786.752605753422	867.926494989454	778.873458595431	730.098942068725	911.782451994033	738.644092929852	640.568679435874
ENSMUSG00000025607	4987.93349299085	4623.24345904219	3949.90421303002	4849.71639977694	2375.38227754773	3537.78011839833	2560.56961710004	2572.89425368756	3325.08259516974	3307.26607719816	2672.39012202439	1976.42584770012	4053.99332679768	2735.77141881333	0.567527023299912	0.00151554601269578	0.105013588888091	Copg2	6	30747553	30873729	-	5121	protein_coding	coatomer protein complex, subunit gamma 2 [Source:MGI Symbol;Acc:MGI:1858683]	-	4817	4198	4292	4608	1745	3064	2551	2682	3843	3942	3000	2272	37.9169150200922	36.2518374636112	30.6559343867998	37.2578704889969	17.8127219399853	27.2094259389959	19.3049491593498	19.7521378438321	25.6241973709885	25.1885291116819	20.2999081486786
ENSMUSG00000049598	106.655003067897	106.825777876868	70.8626804294761	7.36719071146671	110.261297697058	39.2573511832713	16.0600211186204	18.2270659284353	45.8572410991403	39.4321424729359	9.7987637807561	13.0485861423863	73.5382168276728	23.7373034237124	1.62762702290956	0.00153996236060273	0.105013588888091	Vsig8	1	172383505	172391284	+	1879	protein_coding	V-set and immunoglobulin domain containing 8 [Source:MGI Symbol;Acc:MGI:3642995]	-	103	97	77	7	81	34	16	19	53	47	11	15	2.20964023518829	2.28290226981066	1.49890312652669	0.154252280715385	2.25344971748609	0.822881940275425	0.329994105207568	0.3813615735731	0.963127429779031	0.818487481237844	0.202858635075964
ENSMUSG00000026358	94.2291774677533	121.142634705727	72.7032695315405	26.3113953980954	155.182567129192	127.009077357642	20.0750263982755	33.5761740786967	98.6363299113584	17.6186168496097	7.12637365873171	12.1786803995606	99.4296869316585	31.5352002160388	1.65410702257063	0.00154234924506391	0.105013588888091	Rgs1	1	144118034	144124980	-	6947	protein_coding	regulator of G-protein signaling 1 [Source:MGI Symbol;Acc:MGI:1354694]	-	91	110	79	25	114	110	20	35	114	21	8	14	0.52802589114336	0.700225225376772	0.415948356675961	0.149005755549265	0.857822010715747	0.720080052479392	0.111569548669393	0.190011924011387	0.560327857615333	0.0989151831103096	0.0399043537754937
ENSMUSG00000053647	91.1227210677174	150.877645042587	202.464801227075	130.504521174553	134.763808296404	124.699821405685	91.3413701121535	78.6641792700893	87.3883273776071	88.9320660027917	108.677198295659	95.6896317108331	139.072219702337	91.7821287948555	0.601562799544092	0.00157854060592433	0.106652978691015	Gper1	5	139408906	139413555	+	2537	protein_coding	G protein-coupled estrogen receptor 1 [Source:MGI Symbol;Acc:MGI:1924104]	-	88	137	220	124	99	108	91	82	101	106	122	110	1.39821298058197	2.38804477648928	3.17184410692455	2.02377185638616	2.03987878118162	1.93592568693886	1.39006114641646	1.21899940943502	1.35936338786737	1.36718209300704	1.66635280709299
ENSMUSG00000020277	3039.14984470171	3679.43220501667	3313.9806782668	3514.14996936962	2825.95622245792	2537.87229120089	2000.47638058815	2352.25082402755	3232.50288200733	2282.03037290182	2048.83242688537	1728.50271099478	3151.75686850227	2274.09926623417	0.470922726047206	0.00160727596226211	0.107218971782157	Pfkl	10	77822781	77845917	-	6675	protein_coding	phosphofructokinase, liver, B-type [Source:MGI Symbol;Acc:MGI:97547]	-	2935	3341	3601	3339	2076	2198	1993	2452	3736	2720	2300	1987	17.7242538025987	22.1343906905733	19.7324709335121	20.7121643320491	16.257947328374	14.9748269415245	11.570949765021	13.8541315104745	19.1113013127347	13.3339430970081	11.9399954131126
ENSMUSG00000031016	547.771811872983	450.430341769475	646.967069375607	599.899815076575	434.238937843968	708.94157725084	233.87405753991	343.436294862097	307.156992267827	406.067169295766	284.164149641927	582.836847693256	564.708258864908	359.589251883464	0.651035568206333	0.00162024503998777	0.107347646863616	Wee1	7	109721253	109742493	+	3419	protein_coding	WEE 1 homolog 1 (S. pombe) [Source:MGI Symbol;Acc:MGI:103075]	-	529	409	703	570	319	614	233	358	355	484	319	670	6.23688442091183	5.29013278216174	7.52083125712609	6.90297163809798	4.87731960507867	8.16685160596837	2.64100850428871	3.94906276126138	3.54538917589803	4.63219916852022	3.23310028778133
ENSMUSG00000026360	476.323314672159	343.604563892607	562.299970680648	336.785861095621	590.782755562013	407.583675520434	144.540190067584	219.684110400615	224.960050675028	472.346727920488	196.866072322463	312.296161674446	452.896690237247	261.782218843437	0.78954556991378	0.00165138456386904	0.108839453835481	Rgs2	1	143875076	143879899	-	3627	protein_coding	regulator of G-protein signaling 2 [Source:MGI Symbol;Acc:MGI:1098271]	-	460	312	611	320	434	353	144	229	260	563	221	359	5.11235967804211	3.80407792038509	6.16173866838671	3.65311006138669	6.25506471121548	4.42601155970309	1.53860775107945	2.38121185921877	2.44771277548495	5.07927588704953	2.11140872604481
ENSMUSG00000032252	874.985219343423	719.14673148036	642.365596620446	791.446773574709	722.824062680712	712.405461178776	469.755617719647	544.893339334277	610.853060679115	656.922713964018	628.902475383073	591.535905121513	743.862307479738	583.810518700274	0.348723318054114	0.00166927540847724	0.10958028249195	Glce	9	61964530	62029937	-	6828	protein_coding	glucuronyl C5-epimerase [Source:MGI Symbol;Acc:MGI:2136405]	-	845	653	698	752	531	617	468	568	706	783	706	680	4.98854990533183	4.22923711238771	3.73913831581773	4.56020810672619	4.06528166911127	4.10938702782975	2.65622781455578	3.13736417653709	3.53057832629154	3.75240074095261	3.58293378824176
ENSMUSG00000018796	40805.3757854039	61044.8749248949	48193.064753901	51921.8552227855	52625.9477650402	39496.3591742988	36229.4001409678	35772.0558634434	47857.6550882198	36077.8934174721	33417.3476792077	30362.3201418473	49014.5796043874	36619.4453885264	0.420595504026683	0.00173600087250867	0.112206969330027	Acsl1	8	46924074	46989088	+	10483	protein_coding	acyl-CoA synthetase long-chain family member 1 [Source:MGI Symbol;Acc:MGI:102797]	-	39407	55430	52367	49334	38660	34207	36094	37289	55312	43002	37514	34903	151.530101045349	233.8307693266	182.718166816033	194.859272966998	192.781740525913	148.393471883755	133.432741053892	134.154504968855	180.164175529414	134.228282259481	124.003910862561
ENSMUSG00000056429	5264.40811259404	5970.12929763405	5669.93472890912	5608.53704305801	5528.03864133027	5196.98051987953	4917.37771625758	4603.77312581901	5374.8147492049	4528.82351210443	4146.65867267451	4369.53654621377	5539.6713905675	4656.83072037903	0.250501611193501	0.00173652832306591	0.112206969330027	Tgoln1	6	72585415	72593983	-	5013	protein_coding	trans-golgi network protein [Source:MGI Symbol;Acc:MGI:105080]	-	5084	5421	6161	5329	4061	4501	4899	4799	6212	5398	4655	5023	40.8807600931853	47.8215962446615	44.9534600257399	44.0157746712481	42.3472212489355	40.8316285960305	37.8723901248368	36.1046513378244	42.31247258534	35.2351511651553	32.1772981531204
ENSMUSG00000005233	343.781174937298	215.854149112022	137.123888103792	256.799219085411	125.235054174436	142.019241045364	82.3076082329296	111.281034089395	160.932959329059	117.457445664064	120.257555491098	46.9749101125908	203.468787743054	106.535252153189	0.934029165494318	0.00175172977368156	0.112747076097465	Spc25	2	69024239	69036538	-	3188	protein_coding	SPC25, NDC80 kinetochore complex component, homolog (S. cerevisiae) [Source:MGI Symbol;Acc:MGI:1913692]	-	332	196	149	244	92	123	82	116	186	140	135	54	4.19788846717985	2.71881792396406	1.70953334434651	3.16907011351796	1.5085480496398	1.75457603320019	0.996801124179965	1.37230228525205	1.99218329314642	1.43697987676144	1.46738153491914
ENSMUSG00000091055	9.31936920010747	4.40518671657188	5.52176730619295	11.577013975162	8.16750353311539	8.08239583184997	5.01875659956888	0	1.73046192826945	0	0	0	7.8455394271666	1.12486975463972	2.85433416162709	0.00180023369613954	1	Siglec15	18	78086829	78100610	-	1156	protein_coding	sialic acid binding Ig-like lectin 15 [Source:MGI Symbol;Acc:MGI:3646642]	-	9	4	6	11	6	7	5	0	2	0	0	0	0.313830970682881	0.153018705275006	0.189846693125218	0.393999059578138	0.271320775288759	0.275375691035077	0.167619734992707	0	0.0590754207924136	0	0
ENSMUSG00000025584	1157.67275174668	1298.42878470956	1318.78209162908	1191.37998362576	1252.35054174436	1108.44285693942	1064.98015042852	1099.37987126247	1086.73009095321	1006.77810569198	907.721844780951	980.383772164626	1221.17616839915	1024.32897254696	0.254000947389198	0.00189170748134316	0.119284331418259	Pde8a	7	80863344	80984281	+	4045	protein_coding	phosphodiesterase 8A [Source:MGI Symbol;Acc:MGI:1277116]	-	1118	1179	1433	1132	920	960	1061	1146	1256	1200	1019	1127	11.1412623858899	12.8895467162072	12.9579793903252	11.5874596555001	11.8893725148373	10.7928987068016	10.1650574479265	10.6850412161663	10.602438833579	9.70741694603314	8.72937704098403
ENSMUSG00000075270	23.816165733608	8.81037343314377	5.52176730619295	19.9966605025525	10.8900047108205	15.0101636877214	3.01125395974133	4.79659629695667	2.59569289240417	4.19490877371659	8.90796707341463	0.869905742825755	14.0075225623398	4.06272078984319	1.78684550176897	0.00193693212528253	1	Pde11a	2	75819485	76169118	-	5208	protein_coding	phosphodiesterase 11A [Source:MGI Symbol;Acc:MGI:3036251]	-	23	8	6	19	8	13	3	5	3	5	10	1	0.178019667360395	0.0679299628640195	0.0421395501637389	0.151057731891046	0.0802987240741948	0.113516180734999	0.0223235499598581	0.0362083836983515	0.0196691205172898	0.0314152118109191	0.0665359892661181
ENSMUSG00000003528	8177.22873036096	10075.763317479	6127.32112077211	10450.8862521235	5287.09728710336	4825.19031161443	4524.9109501713	6126.21279047306	5519.3083202154	4337.53567202295	5107.82831989595	3158.62775220032	7490.5811699089	4795.73730082983	0.643386793177898	0.0019620510646793	0.122457255275458	Slc25a1	16	17743087	17746083	-	2164	protein_coding	solute carrier family 25 (mitochondrial carrier, citrate transporter), member 1 [Source:MGI Symbol;Acc:MGI:1345283]	-	7897	9149	6658	9930	3884	4179	4508	6386	6379	5170	5734	3631	147.101129126002	186.964321112818	112.537212796428	189.99944231315	93.8234930878079	87.821430871266	80.7308695694336	111.296566825719	100.653761154214	78.1761448692468	91.8180417582997
ENSMUSG00000056234	1568.76048201809	1984.53661581563	1716.34933767497	1853.37469184184	1904.38957380474	2214.57645792689	1507.63448251049	1515.72442983831	1773.72347647618	1401.93851217608	1189.21360430085	1404.02786892077	1873.66452651369	1465.37706237045	0.354344889535045	0.00198531970964544	0.122977867879053	Ncoa4	14	31881822	31901812	+	9365	protein_coding	nuclear receptor coactivator 4 [Source:MGI Symbol;Acc:MGI:1350932]	-	1515	1802	1865	1761	1399	1918	1502	1580	2050	1671	1335	1614	6.52102666187051	8.50921252490198	7.28418009568219	7.78595534211687	7.80907449565925	9.31378514481734	6.21548654147691	6.36296325543199	7.47447582455215	5.83861221610095	4.93970573252273
ENSMUSG00000026622	258.871366669652	96.9141077645814	112.275935225923	157.868372388572	95.2875412196795	106.225773790028	54.2025712753439	59.4777940822627	104.692946660302	65.4405768699788	108.677198295659	46.9749101125908	137.907182843073	73.2443328826893	0.913604200835148	0.00206838072501065	0.127166825395524	Nek2	1	191553556	191565162	+	4516	protein_coding	NIMA (never in mitosis gene a)-related expressed kinase 2 [Source:MGI Symbol;Acc:MGI:109359]	-	250	88	122	150	70	92	54	62	121	78	122	54	2.23150158762308	0.861729785773682	0.988133260438284	1.37530068706919	0.810277426054264	0.926444245633383	0.463396560548482	0.517783094006329	0.914884140695266	0.565173295069921	0.936124240831467
ENSMUSG00000035376	3994.90293044607	4901.87151886536	5089.22886720783	4211.92817532711	3761.13537699964	4942.96236516425	3211.00047240417	3318.28531823462	4436.90438408286	3720.04510053187	2975.26100252049	2951.59018540779	4483.67153900171	3435.5144105303	0.384217707997519	0.00208373359194108	0.127634492172539	Hacd2	16	34842798	34929547	+	3749	protein_coding	3-hydroxyacyl-CoA dehydratase 2 [Source:MGI Symbol;Acc:MGI:1918007]	-	3858	4451	5530	4002	2763	4281	3199	3459	5128	4434	3340	3393	41.481830026914	52.5030483661632	53.9534612877976	44.1999703512465	38.5261026608875	51.9296244072425	33.0682931593155	34.7972747025452	46.7054153166128	38.700913100846	30.8715631690352
ENSMUSG00000030268	380.023166271049	537.43277942177	500.640235761494	387.303740259964	258.637611881987	450.304910631641	146.547692707411	178.433382246788	367.723159757257	253.372489932482	78.3901102460488	318.385501874226	419.057074037984	223.808722794036	0.904711512701574	0.00215629102689765	0.13066334435647	Bcat1	6	144939561	145021910	-	9322	protein_coding	branched chain aminotransferase 1, cytosolic [Source:MGI Symbol;Acc:MGI:104861]	-	367	488	544	368	190	390	146	186	425	302	88	366	1.5869677104836	2.31501116094665	2.13451603421113	1.63455317759568	1.06545260467037	1.902571130448	0.606955339908368	0.752512911134708	1.55673429710968	1.06008040720023	0.327115533411489
ENSMUSG00000020695	6784.50077767824	7173.84656793731	7067.86215192697	5252.80697727576	3765.21912876619	7929.9849390208	3488.03583670037	3507.27121233472	5795.31699777438	5493.65253005924	3210.43133325863	3365.66531899285	6329.03675710088	4143.3955381867	0.611192431877831	0.00218006014972708	0.130916578037211	Mrc2	11	105183469	105241965	+	6674	protein_coding	mannose receptor, C type 2 [Source:MGI Symbol;Acc:MGI:107818]	-	6552	6514	7680	4991	2766	6868	3475	3656	6698	6548	3604	3869	39.5729850667741	43.1622342733954	42.0905536235425	30.9643310287655	21.6648460119545	46.7982354640485	20.1781611459155	20.6599894208124	34.2683822856256	32.104316767533	18.7122570164967
ENSMUSG00000049969	576.765404939984	759.89470860865	688.380324172054	674.624178007166	660.206535593494	584.241755845155	603.254543268179	503.64261118045	577.974284041995	518.49072443137	449.852337207439	471.488912611559	657.352151194417	520.783902123499	0.336516094298713	0.00218498870912381	0.130916578037211	Plekhf2	4	10988662	11007927	-	3039	protein_coding	pleckstrin homology domain containing, family F (with FYVE domain) member 2 [Source:MGI Symbol;Acc:MGI:1919051]	-	557	690	748	641	485	506	601	525	668	618	505	542	7.38814856403573	10.0406252118753	9.0028604466962	8.73348670768381	8.34258560235798	7.57190594703585	7.66402215232595	6.51536444277938	7.50551374453244	6.65424425684521	5.75822024381248
ENSMUSG00000039512	1285.03746414815	1142.04465627126	951.584565767251	1860.74188255331	1031.82794635024	986.052291485696	644.408347384644	618.76092230741	770.920789044038	985.803561823398	1112.60508746949	675.916762175612	1209.54813442932	801.402578367432	0.59376376599868	0.00219504666436832	0.131042695249264	Uhrf1bp1	17	28075415	28119015	+	8758	protein_coding	UHRF1 (ICBP90) binding protein 1 [Source:MGI Symbol;Acc:MGI:3041238]	-	1241	1037	1034	1768	758	854	642	645	891	1175	1249	777	5.71186540836033	5.2361994564949	4.3184233782322	8.35867912929763	4.52432607720987	4.43443531149337	2.84081574707255	2.77756917524902	3.47382091313672	4.39009470554324	4.94179916294052
ENSMUSG00000070465	376.916709871013	234.576192657453	128.841237144502	407.300400762517	36.7537658990192	98.1433779581782	61.2288305147403	110.321714830003	61.4313984535654	67.9575221342087	57.9017859771951	13.0485861423863	213.755280715447	61.9816396753499	1.78715357252384	0.00225831050851499	0.133211124798016	Gm9696	3	59859730	59881015	+	3050	transcribed_unprocessed_pseudogene	predicted gene 9696 [Source:MGI Symbol;Acc:MGI:3819177]	-	364	213	140	387	27	85	61	115	71	81	65	15	4.81074867642351	3.08831883298805	1.678950208491	5.25377488171657	0.462757597722007	1.26737308670289	0.775073654606275	1.422027879647	0.794864629009531	0.869012739148368	0.738484035618567
ENSMUSG00000021750	319.96500920369	488.975725539479	502.480824863558	420.982326369526	217.80009421641	508.03630943057	87.3263648324984	165.962231874701	348.688078546293	236.592854837616	77.4993135387073	304.467009989014	409.706714937206	203.422642269805	1.00977187712415	0.00226370789242243	0.133211124798016	Fam107a	14	14151750	14173499	+	3870	protein_coding	family with sequence similarity 107, member A [Source:MGI Symbol;Acc:MGI:3041256]	-	309	444	546	400	160	440	87	173	403	282	87	350	3.21853798598357	5.07357834265314	5.16049424547815	4.27966091493848	2.16121837198143	5.17043527087787	0.871206821069069	1.68595216424163	3.55572973303878	2.38439996472234	0.77899717293336
ENSMUSG00000029313	2388.86497162755	2494.43697825883	2823.46368256666	2996.3417079351	2756.53244242644	3594.35688922128	1891.06748671755	1491.74144835352	2279.01835953086	2453.18265086946	2108.51580627724	2456.61381773993	2842.33277867264	2113.35659491476	0.42731053843758	0.00234696253599517	0.137088439681483	Aff1	5	103840240	104003188	+	9458	protein_coding	AF4/FMR2 family, member 1 [Source:MGI Symbol;Acc:MGI:1100819]	AF-4	2307	2265	3068	2847	2025	3113	1884	1555	2634	2924	2367	2824	9.83239708966435	10.5903731436286	11.8649432686869	12.4637431798719	11.1921971324708	14.9680493048693	7.71959592555626	6.20070676418012	9.50935636881494	10.1162376226971	8.67214522917986
ENSMUSG00000033031	315.823067336975	116.737447989155	99.391811511473	154.711004940801	121.151302407878	103.916517838071	76.2851003134469	98.8098837173074	92.5797131624154	77.1863214363852	87.2980773194634	84.3808570540982	151.955192004059	86.0899921671861	0.82094141635915	0.00238435322056786	0.137676390402641	Cip2a	16	48814548	48840072	+	5688	protein_coding	cell proliferation regulating inhibitor of protein phosphatase 2A [Source:MGI Symbol;Acc:MGI:2146335]	-	305	106	108	147	89	90	76	103	107	92	98	97	2.16148077128008	0.824116564239544	0.694502459660608	1.07008451911891	0.817937372386563	0.719562158310463	0.517805887395191	0.682948172187219	0.642330955402182	0.529260159150371	0.597027150942307
ENSMUSG00000050530	1113.1468766795	1070.46037212697	1290.25296054708	1405.02851425829	895.702887464988	996.443943269503	865.233637765674	921.905808275072	896.379278843573	889.320660027917	862.291212706537	913.401029967043	1128.50592572439	891.421937930969	0.341340089552831	0.00238972189446836	0.137676390402641	Fam171a1	2	3115261	3228843	+	4442	protein_coding	family with sequence similarity 171, member A1 [Source:MGI Symbol;Acc:MGI:2442917]	-	1075	972	1402	1335	658	863	862	961	1036	1060	968	1050	9.75530910169633	9.67676237311827	11.5446050468392	12.444087198325	7.74349411233092	8.83522544207698	7.52041299269033	8.15933836430775	7.96371782392247	7.80851186393259	7.55134647165261
ENSMUSG00000045534	443.187779738444	541.837966138342	738.07622992779	399.93321005105	394.762670767244	586.551011797112	280.046618255943	289.714416336183	431.750251103227	240.787763611332	129.165522564512	445.391740326787	517.391478069997	302.809385366331	0.773217974052137	0.00241401112476429	0.138591154364952	Kcna5	6	126509514	126512375	-	2862	protein_coding	potassium voltage-gated channel, shaker-related subfamily, member 5 [Source:MGI Symbol;Acc:MGI:96662]	-	428	492	802	380	290	508	279	302	499	287	145	512	6.02816684924402	7.60217458617838	10.24977564388	5.49761472878103	5.29685398950637	8.07196884341454	3.77787473157147	3.97967332039877	5.95340706351835	3.28135509664106	1.75560159518525
ENSMUSG00000028259	63.164613467395	35.2414937325751	52.456789408833	35.7834977414097	50.3662717875449	64.6591666547998	40.150052796551	18.2270659284353	31.14831470885	29.3643614160161	26.7239012202439	28.7068895132499	50.2786387987596	29.0534309305577	0.792178919983749	0.00243465054608032	0.139290753638075	Fhl5	4	25199908	25242876	-	1171	protein_coding	four and a half LIM domains 5 [Source:MGI Symbol;Acc:MGI:1913192]	-	61	32	57	34	37	56	40	19	36	35	30	33	2.09982965449037	1.20846881843147	1.78044097685836	1.20221559177542	1.65171252500011	2.17478598692775	1.32378079352054	0.611937144956324	1.04973642685614	0.978029856344038	0.887752601446481
ENSMUSG00000040522	196.742238668935	157.485425117445	132.522415348631	153.658549124877	159.26631889575	185.895104132549	111.416396510429	78.6641792700893	170.45049993454	114.101518645091	79.2809069533902	77.4216111114922	164.261675214698	105.222518737505	0.641092187631184	0.00246533322463885	0.140558116063579	Tlr8	X	166025692	166047325	-	3586	protein_coding	toll-like receptor 8 [Source:MGI Symbol;Acc:MGI:2176887]	-	190	143	144	146	117	161	111	82	197	136	89	89	2.13576979614513	1.76347017091471	1.46879717068211	1.68578779291588	1.7055529605575	2.04174257480218	1.19957021278997	0.862409788548979	1.8758175861542	1.24099372800515	0.860017553171136
ENSMUSG00000003882	136.684081601576	159.688018475731	130.681826246566	42.0982326369526	215.077593038705	143.173869021342	37.1387988368097	70.0303059355674	125.458489799535	60.4066863415189	30.2870880496098	65.2429307119316	137.900603503479	64.7607166124954	1.08739236091953	0.00249641632135719	0.141839488713802	Il7r	15	9505874	9530262	-	4663	protein_coding	interleukin 7 receptor [Source:MGI Symbol;Acc:MGI:96562]	-	132	145	142	40	158	124	37	73	145	72	34	75	1.14108931966646	1.37513378609246	1.11386497855068	0.355185239991677	1.77125587836662	1.2093211928474	0.307502951109073	0.590428828993097	1.0617866216196	0.505252003603312	0.252662678347203
ENSMUSG00000005980	37.2774768004299	44.0518671657188	37.7320765923185	32.6261302936383	35.3925153101667	24.2471874955499	10.0375131991378	22.0643429660007	11.2480025337514	14.2626898306364	29.3962913422683	21.7476435706439	35.2212089429703	18.1260805737397	0.958349071692323	0.00253271032930764	0.143260100651673	Dnase1	16	3854806	3857888	+	3083	protein_coding	deoxyribonuclease I [Source:MGI Symbol;Acc:MGI:103157]	-	36	40	41	31	26	21	10	23	13	17	33	25	0.470695559013182	0.573758103463856	0.486429552782076	0.416340350279897	0.440848590230237	0.309764157155253	0.125701208985773	0.281361338496486	0.143980769326693	0.180433162042915	0.370909544574509
ENSMUSG00000103149	71.4484972008239	67.1790974277212	18.4058910206432	106.298037408305	20.4187588327885	16.1647916636999	13.0487671588791	23.023662225392	23.3612360316375	4.19490877371659	25.8331045129024	12.1786803995606	49.9858455923303	16.940059850348	1.56430672965912	0.00253880860534615	0.143260100651673	AA914427	16	17739907	17741083	+	1177	TEC	EST AA914427 [Source:MGI Symbol;Acc:MGI:1858439]	-	69	61	20	101	15	14	13	24	27	5	29	14	2.36310899136687	2.29190038682505	0.621531513035265	3.55308211941802	0.66619969463425	0.540924891820814	0.428035578159795	0.769032845407706	0.783288884355486	0.139006306806514	0.85378619633308
ENSMUSG00000063406	4537.49731498566	4684.9160730742	3844.99063421235	4921.28339525976	3951.710459439	3683.26324337163	3586.40346605192	3630.06407753681	3683.28821432152	3479.25733692054	2995.74932678934	2408.76900188452	4270.61018672377	3297.25523725077	0.37328257652093	0.0025834154425029	0.143722023001609	Tmed5	5	108254232	108280486	-	7688	protein_coding	transmembrane p24 trafficking protein 5 [Source:MGI Symbol;Acc:MGI:1921586]	-	4382	4254	4178	4676	2903	3190	3573	3784	4257	4147	3363	2769	22.9757725523678	24.4695778326384	19.877633614334	25.1838116142158	19.7389157892546	18.8696003658501	18.0107841305165	18.5629871110052	18.9071007191845	17.6506874256614	15.1579715159389
ENSMUSG00000033107	338.603747603905	209.246369037164	266.885419799326	285.215526115354	273.611368359366	301.357901730406	179.671486264566	232.155260772703	201.598814643391	234.075909573386	187.067308541707	224.435681649045	279.153388774253	209.834076907466	0.411414900479046	0.00258920714059527	0.143722023001609	Rnf125	18	21077682	21116919	+	1677	protein_coding	ring finger protein 125 [Source:MGI Symbol;Acc:MGI:1914914]	-	327	190	290	271	201	261	179	242	233	279	210	258	7.86005915919811	5.01029046311901	6.32520427383205	6.69108523816343	6.2654551841577	7.0777112187017	4.13649923000964	5.44242450528867	4.74414026225254	5.44392463304037	4.33924154684365
ENSMUSG00000030683	71.4484972008239	131.054304818014	82.8265095928942	71.5669954828194	98.0100423973847	65.8137946307783	50.1875659956888	65.2337096386107	55.3747817046223	55.372795813059	61.464972806561	47.8448158554165	86.786690687119	55.913106968993	0.632368992122803	0.00259052405661769	0.143722023001609	Sez6l2	7	126549735	126569778	+	4210	protein_coding	seizure related 6 homolog like 2 [Source:MGI Symbol;Acc:MGI:2385295]	-	69	119	90	68	72	57	50	68	64	66	69	55	0.660660162194492	1.24999199361347	0.781933885698641	0.668785965781004	0.894005176913458	0.615712759880668	0.460257514611802	0.609167783205178	0.519077901651536	0.512982799303735	0.567929710564325
ENSMUSG00000027834	28.993593067001	25.3298236202883	46.93502210264	26.3113953980954	44.9212694321346	33.4842113033784	14.0525184787929	18.2270659284353	12.1132334978861	17.6186168496097	24.942307805561	22.6175493134696	34.329219153923	18.2618819789591	0.907209639132277	0.00259060756396661	0.143722023001609	Serpini1	3	75464854	75550802	+	7286	protein_coding	serine (or cysteine) peptidase inhibitor, clade I, member 1 [Source:MGI Symbol;Acc:MGI:1194506]	-	28	23	51	25	33	29	14	19	14	21	28	26	0.15491019091505	0.139598590991348	0.256029866407959	0.142072877271582	0.236763311732902	0.181006522612053	0.0744649407390053	0.0983500407279516	0.0656105277315689	0.0943128983073457	0.133166951670909
ENSMUSG00000019577	2074.07738975725	3471.28713265864	2837.26810083214	5150.71876313115	25948.1587247076	4139.34129388316	2767.34238900228	1638.5172950404	2047.13646114276	2238.40332165517	1289.87363223044	2701.05733147397	7270.14190082832	2113.72173842417	1.78214437224632	0.00263079236837655	0.145053908810975	Pdk4	6	5483351	5496309	-	3511	protein_coding	pyruvate dehydrogenase kinase, isoenzyme 4 [Source:MGI Symbol;Acc:MGI:1351481]	-	2003	3152	3083	4894	19062	3585	2757	1708	2366	2668	1448	3105	22.9964736233788	39.7006616800771	32.1182826483544	57.7156338675117	283.809722351124	46.4348155319619	30.431188632149	18.3470881236191	23.0101035470873	24.865429157554	14.2910890822507
ENSMUSG00000020493	186.387384002149	75.989470860865	53.3770839598651	84.1964652739052	74.8687823868911	42.721235111207	37.1387988368097	62.3557518604367	52.7790888122181	14.2626898306364	40.9766485377073	25.2272665419469	86.2567369324805	38.7900407366258	1.15576131979391	0.0026884276078501	0.147166849483542	Prr11	11	86979979	86999534	-	3824	protein_coding	proline rich 11 [Source:MGI Symbol;Acc:MGI:2444496]	-	180	69	58	80	55	37	37	65	61	17	46	29	1.89742992735047	0.79794613020107	0.554778638452738	0.866228438326983	0.751855600281523	0.44001677588734	0.374970256543308	0.64107019087688	0.544686502693232	0.14546951845667	0.416838228988111
ENSMUSG00000026991	2539.01036429595	2365.5852667991	2505.04176790953	3031.07274986059	2128.99592096541	2574.8203864322	1915.15751839548	1731.57126320136	2165.67310322921	2355.02178556449	1617.6868205321	2097.3427459529	2524.08774271046	1980.40887281259	0.350038511481593	0.00272391908370128	0.148137167719863	Pkp4	2	58991194	59185552	+	5707	protein_coding	plakophilin 4 [Source:MGI Symbol;Acc:MGI:109281]	-	2452	2148	2722	2880	1564	2230	1908	1805	2503	2807	1816	2411	17.3190361227396	16.6444239900081	17.4457590001166	20.8951238363143	14.325787646448	17.7697936470376	12.9563740405535	11.9283244595525	14.9757175091452	16.094426412242	11.0264462710682
ENSMUSG00000064325	19.6742238668935	44.0518671657188	47.8553166536722	34.7310419254859	32.6700141324616	71.5869345106712	9.03376187922398	20.145704447218	28.5526218164459	26.8474161517862	13.361950610122	20.0078320849924	41.7615663758172	19.6582144982981	1.08155101250231	0.00273214060149964	0.148137167719863	Hhip	8	80692480	80784635	-	9076	protein_coding	Hedgehog-interacting protein [Source:MGI Symbol;Acc:MGI:1341847]	-	19	40	52	33	24	62	9	21	33	32	15	23	0.0843859683668624	0.194898218706376	0.209564867363433	0.150549662694687	0.138231298472369	0.310658038907417	0.0384291697413865	0.087263960077596	0.124152112846463	0.115370946222136	0.0572696284868791
ENSMUSG00000101249	557.091181073091	559.458713004629	496.038763006333	422.03478218545	1203.34552054567	438.758630871856	405.515533245165	389.483619312881	298.50468262648	358.245209275397	443.616760256049	384.498338328984	612.787931781171	379.977357174159	0.688115093935685	0.0027331249005789	0.148137167719863	Gm29216	1	24654787	24655278	-	492	unprocessed_pseudogene	predicted gene 29216 [Source:MGI Symbol;Acc:MGI:5579922]	-	538	508	539	401	884	380	404	406	345	427	498	442	44.0786512951361	45.6605328431589	40.0712862260276	33.7473444312275	93.92404659576	35.1239934837075	31.8221297216397	31.1222538594357	23.9435562199496	28.3990449871996	35.0745278830845
ENSMUSG00000045102	276.474619603188	247.791752807168	220.870692247718	459.923191558707	159.26631889575	219.379315435928	117.438904429912	179.392701506179	208.520662356468	166.118387439177	174.596154638927	88.730385768227	263.950981758077	155.799532689815	0.761432581615575	0.00275245911005628	0.148695963135729	Poln	5	34164523	34326792	-	5423	protein_coding	DNA polymerase N [Source:MGI Symbol;Acc:MGI:2675617]	-	267	225	240	437	117	190	117	187	241	198	196	102	1.98464475921922	1.83478541591504	1.6187555025097	3.33658479749899	1.12780986844167	1.59330673003726	0.836101950847632	1.30050525724838	1.51744199991548	1.19472114239465	1.2524028893822
ENSMUSG00000040170	2310.16807615997	2218.01151179394	3127.16088440727	2857.41754023316	1965.6458503031	3422.31732080047	1280.78668420998	1356.47743277935	1632.69082932222	2276.99648237336	1638.17514480095	2542.73448627968	2650.12019728299	1787.97684329426	0.567689109913071	0.00277043777578423	0.149178115135937	Fmo2	1	162701886	162726295	-	5609	protein_coding	flavin containing monooxygenase 2 [Source:MGI Symbol;Acc:MGI:1916776]	-	2231	2014	3398	2715	1444	2964	1276	1414	1887	2714	1839	2923	16.0333862503931	15.8787529560521	22.1588672105798	20.0421693779214	13.4577168432167	24.0313491519123	8.81613463431634	9.50766956297503	11.4873835625592	15.8330785638787	11.3611915783226
ENSMUSG00000020458	8587.28097516569	9513.00071443698	8322.2236249838	9898.34694876348	10766.1309072349	6753.41903149864	8382.32727259994	6942.59348021508	7219.48716474013	5898.88071760027	6718.38876676932	4787.96120851296	8973.40036701392	6658.27310173961	0.430512555657841	0.00280380687331737	0.150041418503973	Rtn4	11	29642947	29694331	+	6991	protein_coding	reticulon 4 [Source:MGI Symbol;Acc:MGI:1915835]	-	8293	8638	9043	9405	7909	5849	8351	7237	8344	7031	7542	5504	47.8171280105109	54.6407011174123	47.3132573951422	55.7031598492119	59.1387181040662	38.0476390848433	46.2926626349378	39.0417593841351	40.7539450452178	32.9093086795971	37.3830576009539
ENSMUSG00000038843	153.251849068434	138.763381572014	124.239764389341	119.979963015315	112.983798874763	157.029404733085	84.3151108727571	68.1116674167847	131.515106548478	98.9998470597115	63.2465662212439	92.21000873953	134.374693608825	89.7330511430842	0.581270407501293	0.00280468270311488	0.150041418503973	Gcnt1	19	17303505	17350208	-	5760	protein_coding	glucosaminyl (N-acetyl) transferase 1, core 2 [Source:MGI Symbol;Acc:MGI:95676]	-	148	126	135	114	83	136	84	71	152	118	71	106	1.03573906466421	0.967365127410428	0.857276473643563	0.819488195508923	0.753260582968918	1.07374664290106	0.565157873150409	0.464885473033751	0.901064265475398	0.670348261358663	0.427133327759617
ENSMUSG00000003363	1717.87038921981	1975.72624238249	1921.57502255515	1535.53303543285	1641.66821015619	1850.86864549364	1309.89547248748	1334.41308981335	1794.48901961542	1462.3451985176	1319.26992357271	1264.84295006865	1773.87359087335	1414.2092756792	0.326908213855564	0.00281751542685415	0.150240134913514	Pld3	7	27231425	27252643	-	2924	protein_coding	phospholipase D family, member 3 [Source:MGI Symbol;Acc:MGI:1333782]	-	1659	1794	2088	1459	1206	1603	1305	1391	2074	1743	1481	1454	22.8707360882927	27.1323515899833	26.11937294253	20.6603777478151	21.5605369572486	24.9311061674315	17.2960177712242	17.9415463653017	24.2195486778944	19.5056749304335	17.5511381305422
ENSMUSG00000020686	71.4484972008239	103.521887839439	84.6670986949585	89.4587443535243	66.7012788537757	98.1433779581782	60.2250791948265	40.291408894436	42.3963172426014	82.2202119648451	46.3214287817561	21.7476435706439	85.6568141501166	48.8670149415182	0.810404305112353	0.00286968306434833	0.152528283391185	Gas2l2	11	83312728	83320281	-	2610	protein_coding	growth arrest-specific 2 like 2 [Source:MGI Symbol;Acc:MGI:3652048]	-	69	94	92	85	49	85	60	42	49	98	52	25	1.06566256047464	1.59268434770146	1.28930878079522	1.34846212449139	0.98139808400105	1.48102985227732	0.890889258168132	0.606902453382576	0.641047535510628	1.22864532298116	0.690383542877128
ENSMUSG00000015468	2230.43569522572	2285.19060922166	2701.06450727938	2371.18295327636	1912.55707733785	2694.90169593398	1876.01121691885	1618.37159059318	1938.11735966178	1688.03129054355	1619.46841394678	2324.38814483042	2365.88875637916	1844.06466941576	0.359749238309273	0.00288003897952896	0.152586502462053	Notch4	17	34783242	34807477	+	8061	protein_coding	notch 4 [Source:MGI Symbol;Acc:MGI:107471]	-	2154	2075	2935	2253	1405	2334	1869	1687	2240	2012	1818	2672	10.7712945587626	11.3833881758825	13.3176870371093	11.5726442997299	9.1112305505623	13.1673180123789	8.98531609266299	7.89289402063793	9.48841692201387	8.16732840342064	7.81506422967448
ENSMUSG00000034390	1859.73189815478	2290.69709261738	2270.36665739633	2014.40043167818	1475.59563831618	1988.26937463509	1554.81079454644	1614.53431355561	1632.69082932222	1741.72612284713	1428.83791857571	1443.17362734793	1983.17684879966	1569.29560103251	0.338242358425758	0.00289355001115889	0.152810972864952	Cmip	8	117983803	118186169	+	6495	protein_coding	c-Maf inducing protein [Source:MGI Symbol;Acc:MGI:1921690]	-	1796	2080	2467	1914	1084	1722	1549	1683	1887	2076	1604	1659	11.1464943869387	14.1620637590318	13.8931144850536	12.2017778044319	8.72448418777122	12.0570034663266	9.24241024622879	9.77271133033434	9.92035941530322	10.458975777644	8.55761615219554
ENSMUSG00000076928	52.809758800609	60.5713173528634	46.93502210264	29.4687628458668	57.1725247318077	40.4119791592498	39.1463014766372	39.3320896350447	19.0350812109639	21.8135256233263	16.9251374394878	13.9184918852121	47.8948941655061	25.0284378784453	0.942151345857668	0.00296582775610078	0.154157551852595	Trac	14	54457978	54461663	+	935	TR_C_gene	T cell receptor alpha constant [Source:MGI Symbol;Acc:MGI:4439838]	-	51	55	51	28	42	35	39	41	22	26	19	16	2.19871880066309	2.6013179896751	1.9951161568432	1.23995737096988	2.34815798249907	1.70232245367138	1.61646377163876	1.65379759451157	0.803425722776825	0.909918930672286	0.704157134744483
ENSMUSG00000030522	906.049783343782	829.276399394657	923.055434685254	854.594122530138	830.362859200065	889.063541503497	608.273299867748	641.784584532802	692.184771307779	802.905539289355	578.12706306461	846.41828776946	872.067023442899	694.948924305292	0.327276418336886	0.00305039287346121	0.15451822944692	Mtmr10	7	63937401	63990554	+	7873	protein_coding	myotubularin related protein 10 [Source:MGI Symbol;Acc:MGI:2142292]	-	875	753	1003	812	610	770	606	669	800	957	649	973	4.48000941114828	4.22957850702794	4.65983245659237	4.2704742936426	4.0502256213773	4.44770390855079	2.98294573028961	3.20476343145888	3.46963985449156	3.97752254331214	2.85648560182351
ENSMUSG00000112532	94.2291774677533	66.0778007485783	51.5364948578008	63.1473489554289	24.5025105993462	57.7313987989284	14.0525184787929	41.2507281538273	26.8221598881764	41.1101059824226	26.7239012202439	33.9263239702045	59.5374552379726	30.6476229489446	0.959949604832413	0.00305042290918466	0.15451822944692	Gm36283	10	108253112	108289158	+	3907	lncRNA	predicted gene, 36283 [Source:MGI Symbol;Acc:MGI:5595442]	-	91	60	56	60	18	50	14	43	31	49	30	39	0.938877877085468	0.679125761317789	0.524269069454574	0.635869762252825	0.240834514640751	0.581985262416448	0.138866536530431	0.415083198307839	0.270927409715502	0.41038703519079	0.26607583729046
ENSMUSG00000036768	226.771317202615	100.21799780201	73.6235640825726	77.8817303783623	106.1775459305	50.803630943057	28.1050369575857	51.803240007132	73.5446319514515	26.0084343970428	81.9532970754146	28.7068895132499	105.91263105652	48.3535883169794	1.13102298823081	0.00305716712992024	0.15451822944692	Kif15	9	122780111	122847798	+	11020	protein_coding	kinesin family member 15 [Source:MGI Symbol;Acc:MGI:1098258]	-	219	91	80	74	78	44	28	54	85	31	92	33	0.801075860677161	0.365175946463465	0.265532700850275	0.278042035576244	0.37000078140104	0.181575176935548	0.0984667074817409	0.184808641819506	0.263373450411187	0.0920494213511665	0.289290269991023
ENSMUSG00000033530	2168.306567225	2297.30487269224	2598.91181211481	2234.36369720626	2296.42974339428	2136.06175556035	2336.73307275927	1880.26574840701	1863.70749674619	1620.07376840935	1714.78366163232	1477.96985706096	2288.56307469882	1815.58893416918	0.334447885844099	0.00306721826691805	0.154552157137641	Ttc7b	12	100267029	100487085	-	7320	protein_coding	tetratricopeptide repeat domain 7B [Source:MGI Symbol;Acc:MGI:2144724]	-	2094	2086	2824	2123	1687	1850	2328	1960	2154	1931	1925	1699	11.531258846647	12.6021773975216	14.1111767523172	12.0087899158961	12.0474084468677	11.4933343647076	12.3249417207883	10.0984588554642	10.0477606272684	8.63201439966821	9.11270364465219
ENSMUSG00000000168	2986.3400859011	3737.80092901124	2899.84813030233	3702.53956041998	4194.01306425475	2403.93544598738	2883.77754211228	2638.12796332617	2830.17048368468	2006.84435734602	2248.37088932985	1874.6468757895	3320.74620264613	2413.65635193142	0.460232703245179	0.00310523602423183	0.155282379327128	Dlat	9	50545933	50571080	-	4886	protein_coding	dihydrolipoamide S-acetyltransferase (E2 component of pyruvate dehydrogenase complex) [Source:MGI Symbol;Acc:MGI:2385311]	-	2884	3394	3151	3518	3081	2082	2873	2750	3271	2392	2524	2155	23.7932034493914	30.7185520606373	23.5887300833477	29.8127958822024	32.9630863970648	19.3781653171655	22.7874192558722	21.2270352569705	22.8592377028505	16.0194896472432	17.9004307534836
ENSMUSG00000032202	250.587482936223	212.550259074593	287.131899922033	229.435367871392	155.182567129192	295.584761850513	141.528936107842	163.084274096527	165.259114149732	175.347186741353	162.125000736146	210.517189763833	238.412056463991	169.643616932572	0.492901398335863	0.00312491386777997	0.155282379327128	Rab27a	9	72952136	73004911	+	3879	protein_coding	RAB27A, member RAS oncogene family [Source:MGI Symbol;Acc:MGI:1861441]	-	242	193	312	218	114	256	141	170	191	209	182	242	2.51481887400754	2.2002898489621	2.9420119662653	2.32700356244973	1.5362953102455	3.00127354259774	1.40867988269509	1.65287211091377	1.68131175680353	1.76306153288243	1.62584523438581
ENSMUSG00000017631	959.895027611069	760.996005287793	808.018615806234	836.702373659433	661.567786182346	747.044300458133	564.108241791542	655.215054164281	624.69675610527	600.710936396215	660.080360140024	728.981012487983	795.704018167502	638.965393514219	0.317437148871638	0.00314847985225553	0.155282379327128	Abr	11	76307560	76514384	-	10974	protein_coding	active BCR-related gene [Source:MGI Symbol;Acc:MGI:107771]	-	927	691	878	795	486	647	562	683	722	716	741	838	3.40506889167753	2.78455279977341	2.92643700911118	2.99959421221648	2.31505304491874	2.68117226883344	1.98465187665722	2.34728518592296	2.24650248800865	2.13495649622138	2.3398113649041
ENSMUSG00000039662	1594.64761868506	1463.62328658101	1480.75393261074	1618.67704489083	1615.80444896799	1390.17208307819	1277.77543025024	1303.71487351282	1388.69569743623	1303.77764687112	1370.93613259851	1326.60625780928	1527.2797358023	1328.58433974637	0.200690594117854	0.00315710366417357	0.155282379327128	Icmt	4	152381684	152391578	+	5287	protein_coding	isoprenylcysteine carboxyl methyltransferase [Source:MGI Symbol;Acc:MGI:1888594]	-	1540	1329	1609	1538	1187	1204	1273	1359	1605	1554	1539	1525	11.7414716862848	11.1162431134348	11.1315682680688	12.0450153893364	11.7362956582033	10.3562510686375	9.33108343402485	9.69438484838581	10.3657418412926	9.61795337676977	10.0868811424009
ENSMUSG00000038943	474.252343738802	144.269864967729	150.008011818242	225.225544607696	279.056370714776	79.6693303425211	82.3076082329296	143.8978889087	149.684956795307	65.4405768699788	139.85508305261	75.6817996258407	225.413577698294	109.477985580894	1.04198231477694	0.0031969705348248	0.156116688391216	Prc1	7	79944198	79966007	+	8225	protein_coding	protein regulator of cytokinesis 1 [Source:MGI Symbol;Acc:MGI:1858961]	-	458	131	163	214	205	69	82	150	173	78	157	87	2.24460898029193	0.704332542614766	0.724871989710204	1.07730382265464	1.30288951019108	0.381503545283923	0.386358903815894	0.687805212040175	0.718199103552171	0.31031277818064	0.66144134759121
ENSMUSG00000033082	293.042387070046	262.108609636027	264.124536146229	286.267981931278	224.606347160673	239.007991027563	226.847798300513	172.67746669044	181.698502468292	227.364055535439	186.176511834366	223.565775906219	261.526308828636	203.055018455878	0.3671694657559	0.00319903544763115	0.156116688391216	Clec1a	6	129401735	129428963	-	5180	protein_coding	C-type lectin domain family 1, member a [Source:MGI Symbol;Acc:MGI:2444151]	-	283	238	287	272	165	207	226	180	210	271	209	257	2.20225599307085	2.03184026761109	2.02657069084748	2.17419993508728	1.66511340664665	1.81729729341328	1.69079774074342	1.31054776888736	1.38428080613575	1.71190828815264	1.39811894417896
ENSMUSG00000027820	4706.28144605427	4440.42821030446	3851.43269606958	4740.26099492086	3891.81543352948	3176.38156191704	3179.88418148684	3573.46424123272	3398.62722712119	2646.14845446042	3644.24932973393	2933.32216480845	4134.43339046595	3229.28259980726	0.356616668113349	0.0032598876792388	0.157056050557946	Mme	3	63148958	63293451	+	11542	protein_coding	membrane metallo endopeptidase [Source:MGI Symbol;Acc:MGI:97004]	-	4545	4032	4185	4504	2859	2751	3168	3725	3928	3154	4091	3372	15.8731800437751	15.4483400003717	13.2624577312246	16.1576295236131	12.9485971179525	10.8391422147603	10.6369491327009	12.1718142795231	11.6205068584615	8.94173062715189	12.2821954315776
ENSMUSG00000028124	1248.7954728144	1117.81612933012	1077.66491925866	1272.41908145189	1113.5029816814	1118.83450872323	905.383690562225	888.329634196375	906.76205041319	1123.3965696013	1028.87019697939	936.018579280512	1158.17218220995	964.793453505499	0.263314351616397	0.00332319921625836	0.15786966172791	Gclm	3	122039206	122064381	+	6291	protein_coding	glutamate-cysteine ligase, modifier subunit [Source:MGI Symbol;Acc:MGI:104995]	-	1206	1015	1171	1209	818	969	902	926	1048	1339	1155	1076	7.72749526031807	7.13491367220535	6.80842770526606	7.95732231705675	6.79709361731713	7.00469912965497	5.55648097643348	5.5513858175406	5.68821835836589	6.96469103627361	6.36194474762556
ENSMUSG00000024892	15146.045921108	21509.4254403414	16956.4271027675	18806.3329747427	18040.654054063	16389.9441190158	14816.3732332472	15693.5037643828	16716.2622270829	12120.7694107767	12107.7088461852	10546.7372260195	17808.1382686731	13666.8924512824	0.381860783811252	0.00336207968642834	0.15786966172791	Pcx	19	4560500	4671780	+	4753	protein_coding	pyruvate carboxylase [Source:MGI Symbol;Acc:MGI:97520]	-	14627	19531	18425	17869	13253	14195	14761	16359	19320	14447	13592	12124	124.050515067778	181.718453220672	141.791208039903	155.665642562891	145.759213673701	135.816638273115	120.354115460164	129.807279527974	138.795047543036	99.4605420866178	99.0930385246211
ENSMUSG00000061928	32.1000494670368	33.0389003742891	21.1667746737396	23.1540279503239	25.8637611881987	35.7934672553356	16.0600211186204	5.755915556348	17.3046192826945	20.1355621138396	15.1435440248049	4.34952871412878	28.519496818154	13.1248651350727	1.11498565110499	0.0033671538776324	0.15786966172791	Dsg1b	18	20509786	20543253	+	3965	protein_coding	desmoglein 1 beta [Source:MGI Symbol;Acc:MGI:2664357]	-	31	30	23	22	19	31	16	6	20	24	17	5	0.315158936959274	0.334595756553418	0.212175026347764	0.229741696278602	0.250495565718465	0.355552630658729	0.1563830828966	0.0570713530293108	0.172235022537277	0.198065581572278	0.148570752727996
ENSMUSG00000040560	737.265652275168	725.754511555218	677.336789559668	830.38763876389	940.624156897122	777.064627833576	706.640929219298	554.486531928191	616.044446463923	693.837911172724	626.230085261049	541.08137203762	781.405562814107	623.053546013801	0.325482338316162	0.0033684100349435	0.15786966172791	Wdr7	18	63841756	64122847	+	10188	protein_coding	WD repeat domain 7 [Source:MGI Symbol;Acc:MGI:1860197]	-	712	659	736	789	691	673	704	578	712	827	703	622	2.81709947107599	2.86047952869358	2.64239962141777	3.20662667537804	3.54551024109343	3.00408019402374	2.6779144721379	2.13968091107158	2.38630372705406	2.65618021030659	2.39107931649837
ENSMUSG00000052456	1076.90488534575	1126.62650276326	964.468689481701	949.315145963281	1082.19421813779	1053.02071409245	822.072331009382	930.539681609594	980.306682364641	896.032514065863	808.843410266049	815.971586770558	1042.08835929737	875.627701014348	0.250371528219931	0.00337304628498369	0.15786966172791	Get3	8	85744560	85751910	-	1881	protein_coding	guided entry of tail-anchored proteins factor 3, ATPase [Source:MGI Symbol;Acc:MGI:1928379]	-	1040	1023	1048	902	795	912	819	970	1133	1068	908	938	22.2872081158832	24.0507821150663	20.3789642531352	19.8553741922014	22.0936752530458	22.0491289237436	16.8736130548256	19.4488106785735	20.5672286634828	18.5790464521885	16.7272538195073
ENSMUSG00000007594	122.187285068076	45.1531638448618	27.6088365309647	85.248921089829	23.1412600104936	51.9582589190355	25.0937829978444	17.267746669044	14.7089263902903	38.5931607181926	34.7410715863171	4.34952871412878	59.2162875772101	22.4590361793029	1.40024162719261	0.00338216851307593	0.15786966172791	Hapln4	8	70536107	70543512	+	3924	protein_coding	hyaluronan and proteoglycan link protein 4 [Source:MGI Symbol;Acc:MGI:2679531]	-	118	41	30	81	17	45	25	18	17	46	39	5	1.21217167994423	0.462058776453503	0.279641663166096	0.854705215982266	0.226469413692435	0.521517527582813	0.246901648383752	0.173002992936711	0.147929430353276	0.38359222543926	0.344400047192145
ENSMUSG00000024561	2516.22968402902	1908.54714495477	3134.52324081553	2811.10948433251	1844.49454789523	2629.0879013032	1343.01926604463	1701.83236616023	2067.03677331785	1981.67490470372	1681.82418346068	2084.29415981051	2473.99866722171	1809.9469422496	0.451060811609654	0.00339577595524006	0.15805706331777	Mbd1	18	74400676	74415803	+	6778	protein_coding	methyl-CpG binding domain protein 1 [Source:MGI Symbol;Acc:MGI:1333811]	MBD	2430	1733	3406	2671	1355	2277	1338	1774	2389	2362	1888	2396	14.4515967202037	11.3067909846294	18.3803043995985	16.3167123619462	10.4502664502018	15.2773089080391	7.6501073315373	9.87102293661847	12.0350873705869	11.4030044080499	9.65223794335964
ENSMUSG00000020897	361.384427870834	129.953008138871	113.196229776955	152.606093308953	206.91008950559	73.8961904626283	41.1538041164648	113.199672608177	141.03264715396	53.6948323035723	84.625687197439	65.2429307119316	172.991006510639	83.1582623485908	1.05622893108117	0.0034512709706059	0.15973761736706	Aurkb	11	68936473	68942490	+	2946	protein_coding	aurora kinase B [Source:MGI Symbol;Acc:MGI:107168]	-	349	118	123	145	152	64	41	118	163	64	95	75	4.77533462081105	1.77129799296953	1.52715102976287	2.03795971013045	2.69712129823141	0.987944676827617	0.539341816681217	1.51063441626067	1.88925040547741	0.710866739926754	1.11742518836743
ENSMUSG00000036109	162.571218268541	64.9765040694353	28.5291310819969	134.714344438248	59.8950259095129	19.6286755916356	18.067523758448	41.2507281538273	11.2480025337514	36.0762154539627	51.6662090258049	14.7883976280378	78.3858165598951	28.849512758972	1.44286099080409	0.00351497604681931	0.160432854081556	Mbnl3	X	50206146	50295409	-	8743	protein_coding	muscleblind like splicing factor 3 [Source:MGI Symbol;Acc:MGI:2444912]	-	157	59	31	128	44	17	18	43	13	43	58	17	0.72385286681634	0.298424104271317	0.129691297701691	0.606191476273569	0.263076364220661	0.0884247492724193	0.0797856901687805	0.185488968979609	0.0507712126082804	0.160934420537218	0.229876782130627
ENSMUSG00000027340	947.469202010926	838.086772827801	726.112400764372	641.998047713527	852.142868621706	827.868258776633	737.757220136625	495.968057105319	661.036456598929	625.880389038515	537.150414526902	672.437139204309	805.612925119161	621.704946101766	0.373500506233368	0.00355370355782587	0.161174023274572	Slc23a2	2	131894416	131987028	-	7951	protein_coding	solute carrier family 23 (nucleobase transporters), member 2 [Source:MGI Symbol;Acc:MGI:1859682]	-	915	761	789	610	626	717	735	517	764	746	603	773	4.63885145027334	4.2325809121402	3.62965101355011	3.17664303920742	4.11568580393162	4.10093415501744	3.58243702764188	2.45232993609922	3.28100027902949	3.07013899235329	2.62798663759351
ENSMUSG00000027195	3567.2474327078	3882.07079397897	3180.53796836714	4170.88239850608	2868.15499071235	3075.9289280069	2694.06854264857	2965.25583077861	3173.66717644616	2590.77565864736	2469.28847275054	1925.1014088734	3457.47041871321	2636.35951502411	0.391340601217094	0.00356890199664012	0.161174023274572	Hsd17b12	2	93863034	93988309	-	2407	protein_coding	hydroxysteroid (17-beta) dehydrogenase 12 [Source:MGI Symbol;Acc:MGI:1926967]	-	3445	3525	3456	3963	2107	2664	2684	3091	3668	3088	2772	2213	57.6931511917517	64.7627671505112	52.5178893633507	68.1723580357682	45.7591636757116	50.3319230874572	43.2134958239145	48.4320692789727	52.034082228367	41.9799739565926	39.9066001568549
ENSMUSG00000067586	494.962053072374	579.282053229203	605.55381457916	358.887433230021	491.411462575776	390.264255880756	373.395491007924	366.459957087489	425.693634354284	293.643614160161	254.767858299659	378.408998129203	486.726845427882	348.728258839787	0.481736346835964	0.00358309357157572	0.161174023274572	S1pr3	13	51562675	51576833	+	4463	protein_coding	sphingosine-1-phosphate receptor 3 [Source:MGI Symbol;Acc:MGI:1339365]	-	478	526	658	341	361	338	372	382	492	350	286	435	4.31729907158359	5.21196178885833	5.3927293835354	3.16364559691736	4.2283404533723	3.44409567577073	3.23019717133693	3.22809707367186	3.76420162743971	2.56615048572455	2.22058161729804
ENSMUSG00000058446	2184.87433469186	2622.18739303941	2137.8442420477	2203.84247854447	2179.36219275296	2260.76157696603	1794.70736000583	1686.48325800996	1820.44594853946	2239.24230340991	1599.87088638527	1982.5151878999	2264.81203634041	1853.87749070839	0.288617890055221	0.00360673132937838	0.161174023274572	Znrf2	6	54793901	54870485	+	6176	protein_coding	zinc and ring finger 2 [Source:MGI Symbol;Acc:MGI:1196246]	-	2110	2381	2323	2094	1601	1958	1788	1758	2104	2669	1796	2279	13.7716600181861	17.0488258206087	13.7578808170915	14.0387915031008	13.5510727760773	14.417527690645	11.2194923448512	10.7354855934321	11.6325013165	14.1410692773307	10.0768928116565
ENSMUSG00000117664	430.761954138301	852.40362965666	754.641531846369	746.191173489985	618.007767339064	956.031964110254	264.990348457237	403.873408203751	637.675220567291	575.541483753916	396.404534766951	526.292974409582	726.339670096772	467.462995026455	0.635195296342908	0.00360704320024323	0.161174023274572	Gm36860	19	32952390	32957463	-	456	lncRNA	predicted gene, 36860 [Source:MGI Symbol;Acc:MGI:5596019]	-	416	774	820	709	454	828	264	421	737	686	445	605	36.7738933912073	75.0617151494407	65.7746627731201	64.3786294311165	52.0451953838258	82.575438420007	22.4363426333395	34.81988746874	55.187066231748	49.22664484839	33.8160410709615
ENSMUSG00000021697	53.8452442672876	15.4181535080016	17.485596469611	36.8359535573335	29.9475129547564	8.08239583184997	5.01875659956888	21.1050237066093	6.05661674894306	5.87287228320322	13.361950610122	5.21943445695453	26.9358094314734	9.43910906756683	1.51780623020655	0.00361935940990297	0.161178878370192	Depdc1b	13	108452866	108544316	+	3350	protein_coding	DEP domain containing 1B [Source:MGI Symbol;Acc:MGI:2145425]	-	52	14	19	35	22	7	5	22	7	7	15	6	0.625705051730989	0.184810054191843	0.207452376507577	0.432597067857028	0.343295022743468	0.0950251638318056	0.057841317507931	0.247678314664019	0.0713490007540614	0.068374505180828	0.155157954670721
ENSMUSG00000062609	292.006901603367	427.303111507473	862.315994317132	348.362875070783	392.040169589539	546.139032637862	288.076628815253	265.731434851399	413.580400856398	197.16071236468	159.452610614122	344.482674158999	478.028014121026	278.080743610142	0.782286941864476	0.00363719982414796	0.161415621660679	Kcnj15	16	95058417	95101119	+	6313	protein_coding	potassium inwardly-rectifying channel, subfamily J, member 15 [Source:MGI Symbol;Acc:MGI:1310000]	-	282	388	937	331	288	473	287	277	478	235	179	396	1.80062984309016	2.71793021699619	5.42891974987667	2.17096358395721	2.38476907638565	3.40730292027082	1.76181006551561	1.65483268358565	2.58539419581993	1.21807221388081	0.982527773570914
ENSMUSG00000032902	1094.50813827929	1102.39797582211	1000.36017697196	1059.82300663528	1049.52420400533	885.599657575561	804.004807250934	824.055243817156	1053.85131431609	773.541177873339	706.401788921781	575.007696007824	1032.03552654825	789.477004697854	0.386588301312661	0.00368100018273959	0.161480694828438	Slc16a1	3	104545984	104565778	+	4426	protein_coding	solute carrier family 16 (monocarboxylic acid transporters), member 1 [Source:MGI Symbol;Acc:MGI:106013]	-	1057	1001	1087	1007	771	767	801	859	1218	922	793	661	9.62663936410218	10.0014975667196	8.98313145329648	9.42059633698463	9.10610390556799	7.88078262241408	7.01348844712637	7.31967611010265	9.39659569352516	6.81648486708487	6.20853840157408
ENSMUSG00000033933	1335.7762520154	1592.47499804074	1554.37749669331	1463.96603995003	884.812882754167	1524.10892829171	813.038569130158	975.627686800986	1189.69257568524	1191.35409173551	1083.20879612722	909.92140699574	1392.58609962423	1027.14052107914	0.439448341774954	0.00368493908208368	0.161480694828438	Vhl	6	113600920	113608594	+	2997	protein_coding	von Hippel-Lindau tumor suppressor [Source:MGI Symbol;Acc:MGI:103223]	-	1290	1446	1689	1391	650	1320	810	1017	1375	1420	1216	1046	17.3505837956897	21.3365361435413	20.6135374696862	19.2176695424336	11.3374725031683	20.0296141124098	10.4739683054902	12.798065249258	15.6657292875445	15.5039573452118	14.0596472949983
ENSMUSG00000027326	157.393790935148	47.3557572031478	31.2900147350934	53.6752466121146	76.2300329757436	36.9480952313141	29.1087882774995	51.803240007132	19.9003121750986	15.1016715853797	36.522665001	25.2272665419469	67.1488229487603	29.6106572646761	1.18362300260492	0.0038474267235316	0.167266623017494	Knl1	2	118877600	118935982	+	8542	protein_coding	kinetochore scaffold 1 [Source:MGI Symbol;Acc:MGI:1923714]	-	152	43	34	51	56	32	29	54	23	18	41	29	0.717290610065693	0.222613375140775	0.145589136552594	0.247212794070887	0.342703147371675	0.170363206388092	0.131568344553863	0.238420888884448	0.0919396679951237	0.0689531167408758	0.166322836759724
ENSMUSG00000041879	2721.25580643138	2883.1947059963	2305.33785033555	2859.52245186501	2621.76863413004	2386.6160263477	2441.1232100303	2038.55342620658	2340.44975798443	2170.44579952096	2192.25069676734	2126.04963546615	2629.61591251766	2218.14542099596	0.245474733994674	0.00393756604856388	0.169841036079024	Ipo9	1	135310050	135358237	-	8233	protein_coding	importin 9 [Source:MGI Symbol;Acc:MGI:1918944]	-	2628	2618	2505	2717	1926	2067	2432	2125	2705	2587	2461	2444	12.8670316793329	14.0622201443556	11.1290792545881	13.6644406023886	12.2289114552473	11.4174141641677	11.4477051378748	9.73443902319096	11.2187331051537	10.2820397082193	10.3581236777971
ENSMUSG00000111258	17.6032529335363	5.50648339571485	0	10.5245581592382	2.72250117770513	2.30925595195713	0	0.959319259391334	0.865230964134723	1.67796350948663	0	0	6.4443419363586	0.583752288835449	3.44527805524468	0.00396777265774037	1	Gm34397	9	100266255	100273960	-	1302	lncRNA	predicted gene, 34397 [Source:MGI Symbol;Acc:MGI:5593556]	-	17	5	0	10	2	2	0	1	1	2	0	0	0.526319016543776	0.169824907160049	0	0.318016277665359	0.0802987240741948	0.069856111221538	0	0.0289667069586812	0.0262254940230531	0.0502643388974706	0
ENSMUSG00000021965	118.045343201361	34.1401970534321	43.2538438985114	77.8817303783623	47.6437706098398	25.4018154715285	7.02625923939643	42.2100474132187	32.8787766371195	10.0677810569198	31.1778847569512	15.6583033708636	57.7277834355059	23.1698420790782	1.31877584783833	0.0039979071810958	0.170963815177859	Ska3	14	58044018	58063642	-	2705	protein_coding	spindle and kinetochore associated complex subunit 3 [Source:MGI Symbol;Acc:MGI:3041235]	-	114	31	47	74	35	22	7	44	38	12	35	18	1.69882524709274	0.506800214624317	0.635536077072048	1.13272577894647	0.676379455833837	0.369862929728232	0.100286794496191	0.613473089925667	0.479679313229047	0.145162667455468	0.448361557243179
ENSMUSG00000036022	644.071960274094	485.67183550205	282.530427166872	684.09628035048	251.831358937725	317.522693394106	243.911570739047	278.202585223487	276.008677558977	356.56724576591	275.256182568512	204.427849564052	444.287425937554	272.395685236664	0.706302733845416	0.00402585181094916	0.170963815177859	Fam122b	X	52332292	52358682	-	4409	protein_coding	family with sequence similarity 122, member B [Source:MGI Symbol;Acc:MGI:1926005]	-	622	441	307	650	185	275	243	290	319	425	309	235	5.68671430941894	4.42324358552829	2.54687656371796	6.10426799247434	2.19341729051387	2.83646865761757	2.13589133669001	2.48066437139008	2.4705022083345	3.15420411985885	2.42854398998105
ENSMUSG00000079737	28.993593067001	49.5583505614337	32.2103092861255	58.9375256917337	34.0312647213141	41.5666071352284	27.1012856376719	22.0643429660007	20.7655431392334	31.0423249255027	11.580357195439	23.4874550562954	40.8829417438061	22.6735514866905	0.850749479989411	0.00408242178156976	0.172685725194806	3110001I22Rik	16	13489793	13496252	+	1705	protein_coding	RIKEN cDNA 3110001I22 gene [Source:MGI Symbol;Acc:MGI:1913848]	-	28	45	35	56	25	36	27	23	24	37	13	27	0.661979853963081	1.16716027102724	0.750850166553893	1.35995324557986	0.766487820708223	0.960204001517868	0.613694682532828	0.508760707674292	0.480641781367954	0.710098024060631	0.264208364649458
ENSMUSG00000063558	2232.50666615908	2551.70440557426	2338.46845417271	2656.39847939171	2742.91993653792	2319.64760374094	2105.8702691791	1763.22879876127	2152.69463876719	2162.89496372827	2031.90728944588	2251.31606243305	2473.60759092944	2077.98533705246	0.250956709409682	0.00408736012781298	0.172685725194806	Aox1	1	58069090	58145572	+	8690	protein_coding	aldehyde oxidase 1 [Source:MGI Symbol;Acc:MGI:88035]	-	2156	2317	2541	2524	2015	2009	2098	1838	2488	2578	2281	2588	10.0009234899359	11.7909452583789	10.6953378787734	12.0262411558715	12.121180182415	10.5134572803325	9.35618255100095	7.97693109572531	9.77609159107267	9.70742625502522	9.09563664689767
ENSMUSG00000024413	886.375559476888	864.517893127232	947.903387563122	979.836364625072	1583.13443483553	929.475520662746	767.869759734038	670.564162314542	837.543573282412	796.193685251408	725.999316483293	802.923000628172	1031.87386004843	766.848916282311	0.426958769139613	0.00421113375400878	0.176514503385374	Npc1	18	12322749	12369457	-	11317	protein_coding	NPC intracellular cholesterol transporter 1 [Source:MGI Symbol;Acc:MGI:1097712]	-	856	785	1030	931	1163	805	765	699	968	949	815	923	3.04897296501482	3.06747270232519	3.32901329224963	3.40626709523193	5.37202508438507	3.23481880058347	2.6196489607396	2.32946382165608	2.9206445378668	2.74394789312702	2.4954788120511
ENSMUSG00000090946	867.736821076673	1118.91742600926	1404.36948487507	988.256011152463	835.807861555475	1150.00946407465	737.757220136625	834.60775567046	898.974971735977	890.998623537403	571.000689405878	786.394791514483	1060.84951145727	786.622342000138	0.43200080666891	0.00421444803334137	0.176514503385374	Ccdc71l	12	32428703	32432942	+	4240	protein_coding	coiled-coil domain containing 71 like [Source:MGI Symbol;Acc:MGI:1919373]	-	838	1016	1526	939	614	996	735	870	1039	1062	641	904	7.96689854737122	10.5966896975633	13.1643159625668	9.16980435649905	7.56993495155488	10.6826469555661	6.71791434122184	7.7386197265039	8.36728097960322	8.19595610113988	5.23865462204673
ENSMUSG00000055320	2542.11682069598	2529.6784719914	2543.69413905288	2813.21439596436	4545.21571617871	3227.18519286009	2685.03478076935	1515.72442983831	1900.04719723985	2371.80142065936	2396.24314274854	2066.02613921117	3033.51745612391	2155.81285174443	0.492449250102021	0.0042997298873757	0.176572288460812	Tead1	7	112278525	112506014	+	13570	protein_coding	TEA domain family member 1 [Source:MGI Symbol;Acc:MGI:101876]	TEA	2455	2297	2764	2673	3339	2795	2675	1580	2196	2827	2690	2375	7.29260638809958	7.48554651280936	7.45019794063629	8.15604184436077	12.8625241882176	9.3667161306259	7.63935897594615	4.39124177502731	5.52569806239949	6.8169000167362	6.86910296494817
ENSMUSG00000023019	18195.5506204765	23817.743279825	15577.8258653213	23512.915383554	23290.9975752674	13848.6079438869	16916.2209945069	17114.2555875414	15236.7172784125	10033.3828049753	12863.9952507181	8492.88976720785	19707.2734447219	13442.9102805603	0.551889369045871	0.00431225153896126	0.176572288460812	Gpd1	15	99615396	99622886	+	2961	protein_coding	glycerol-3-phosphate dehydrogenase 1 (soluble) [Source:MGI Symbol;Acc:MGI:95679]	-	17572	21627	16927	22341	17110	11994	16853	17840	17610	11959	14441	9763	239.218031305736	322.99830150826	209.098639567564	312.409718353157	302.065576143217	184.209078990957	220.572717005734	227.230462644384	203.074602015956	132.159206348372	168.999902699304
ENSMUSG00000024222	1705.44456361967	3019.75549421003	3466.74957373814	3726.74604418623	2431.19355169068	4677.39793068918	685.562151501108	702.221697874456	2782.58278065727	1483.31974238619	505.972529769951	1895.52461361732	3171.21452635565	1342.53058596772	1.24000250294287	0.00431463982663443	0.176572288460812	Fkbp5	17	28618068	28736501	-	9468	protein_coding	FK506 binding protein 5 [Source:MGI Symbol;Acc:MGI:104670]	-	1647	2742	3767	3541	1786	4051	683	732	3216	1768	568	2179	7.01207374165843	12.8071225993573	14.5528144259808	15.4855990943745	9.8608156209262	19.4576052354828	2.79560258817113	2.91583498108033	11.598249660872	6.11033434855766	2.07882380050308
ENSMUSG00000028068	664.781669607666	120.041338026584	171.174786491981	269.428688876497	284.501373070186	95.8341220062211	71.266343713878	152.531762243222	105.558177624436	55.372795813059	164.797390858171	63.5031192262801	267.626996346523	102.171598246508	1.38957058147498	0.00432798647736524	0.176572288460812	Iqgap3	3	87989278	88028355	+	11384	protein_coding	IQ motif containing GTPase activating protein 3 [Source:MGI Symbol;Acc:MGI:3028642]	-	642	109	186	256	209	83	71	159	122	66	185	73	2.27327128283596	0.423422543470481	0.597623515006616	0.931119479455343	0.959712236367786	0.331564938302298	0.241699883507754	0.5267594642632	0.365931339827639	0.189709907332108	0.563124516322202
ENSMUSG00000087382	1529.4120342843	1757.66949991218	1476.15245985558	1951.25308272275	1697.47948429915	1589.92272292249	960.590013157483	1058.12914310864	1289.19413656074	1834.85309762364	1223.06387917983	924.709804623778	1666.98154733274	1215.09001237568	0.455797552565325	0.0043293806237888	0.176572288460812	Ctcflos	2	172952577	172980062	+	5402	lncRNA	CCCTC-binding factor (zinc finger protein)-like, opposite strand [Source:MGI Symbol;Acc:MGI:1921411]	-	1477	1596	1604	1854	1247	1377	957	1103	1490	2187	1373	1063	11.0214069956724	13.0653387071205	10.8607396863327	14.2107004218184	12.0670609602479	11.5921703469066	6.865471005722	7.70071485812733	9.41816621526147	13.2475377765398	8.80731544373335
ENSMUSG00000045318	41.4194186671443	34.1401970534321	50.6162003067687	43.1506884528764	16.3350070662308	17.3194196396785	12.0450158389653	5.755915556348	9.51754060548196	15.940653340123	18.7067308541707	27.8369837704242	33.8301551976885	14.9671399942522	1.18023173580463	0.00439580172517224	0.177923182413444	Adra2c	5	35435663	35439107	+	3445	protein_coding	adrenergic receptor, alpha 2c [Source:MGI Symbol;Acc:MGI:87936]	-	40	31	55	41	12	15	12	6	11	19	21	32	0.46803883516776	0.397937468957555	0.583959978176167	0.492782146134462	0.182088137145895	0.198010138193997	0.134991057406028	0.0656858968827917	0.109028018983502	0.180470132894866	0.211231003601068
ENSMUSG00000048922	143.932479868326	30.8363070160032	67.1815022253475	77.8817303783623	80.3137847423013	26.556443447507	24.0900316779306	34.535493338088	26.8221598881764	21.8135256233263	61.464972806561	8.69905742825755	71.1170412796413	29.57087346039	1.26737463550165	0.00442557796072572	0.177923182413444	Cdca2	14	67913780	67953290	-	5715	protein_coding	cell division cycle associated 2 [Source:MGI Symbol;Acc:MGI:1919787]	-	139	28	73	74	59	23	24	36	31	26	69	10	0.980414420009876	0.216662705701723	0.467214428097139	0.536137048477726	0.53966643796426	0.183019344412964	0.162745124326777	0.237572613922538	0.185216691121342	0.148866876671669	0.418369918018514
ENSMUSG00000015880	209.168064269079	47.3557572031478	60.7394403681224	67.3571722191242	53.08877296525	48.4943749910998	15.0562697987066	48.925282228958	41.5310862784667	15.940653340123	61.464972806561	14.7883976280378	81.0339303359705	32.9511103468089	1.2999115282479	0.00444764178373568	0.177923182413444	Ncapg	5	45827261	45857888	+	7066	protein_coding	non-SMC condensin I complex, subunit G [Source:MGI Symbol;Acc:MGI:1930197]	-	202	43	66	64	39	42	15	51	48	19	69	17	1.15236182070794	0.269114555682493	0.341648818253647	0.375030574374456	0.288523111451986	0.270309339515892	0.0822679367329049	0.272211615549158	0.231954213765175	0.0879874904928976	0.338378726503794
ENSMUSG00000070369	1582.22179308491	1412.96363934043	646.967069375607	371.516903021107	770.467833290552	884.445029599582	172.645227025169	333.843102268184	918.010052946941	281.897869593755	116.694368661732	234.874550562954	944.763711285365	342.994195176456	1.46161759513886	0.00444771120745611	0.177923182413444	Itgad	7	127753548	127822988	+	4510	protein_coding	integrin, alpha D [Source:MGI Symbol;Acc:MGI:3578624]	-	1528	1283	703	353	566	766	172	348	1061	336	131	270	13.657082631761	12.580342942972	5.70149048073484	3.24084676968215	6.56038795226658	7.72391741871386	1.47796750102305	2.91013282841477	8.03292115394989	2.43783158161356	1.00651985820023
ENSMUSG00000041161	223.664860802579	249.994346165454	226.392459553911	215.753442264382	264.082614237398	225.152455315821	213.799031141634	140.060611871135	170.45049993454	169.47431445815	206.66483610322	102.648877653439	234.173363056591	167.18302852702	0.485997406616518	0.00444888943098495	0.177923182413444	Otud3	4	138622690	138641256	-	1668	protein_coding	OTU domain containing 3 [Source:MGI Symbol;Acc:MGI:1920412]	-	216	227	246	205	194	195	213	146	197	202	232	118	5.21997988646633	6.0182770516524	5.39446874542136	5.08883241436817	6.07988432747384	5.31647724161759	4.9487616436192	3.30116262541345	4.03278289205574	3.96274645904987	4.81969473901216
ENSMUSG00000027809	2195.22918935865	2386.50990370282	2174.65602408899	2425.91065570439	3754.32912405537	2160.3089430559	2003.4876345479	2015.52976398119	2075.6890829592	1790.38706462224	1909.8681405401	1551.91184520115	2516.15730666102	1891.14558864196	0.411535540307043	0.0044743197548192	0.178287421527022	Etfdh	3	79511095	79536807	-	7505	protein_coding	electron transferring flavoprotein, dehydrogenase [Source:MGI Symbol;Acc:MGI:106100]	-	2120	2167	2363	2305	2758	1871	1996	2101	2399	2134	2144	1784	11.386658323665	12.7688145798322	11.5165565766878	12.7168798276387	19.2102580318195	11.3372698795695	10.3067755802407	10.5580925807976	10.9147605769511	9.30432093056478	9.89923600823437
ENSMUSG00000033952	261.977823069688	69.3816907860072	87.427982348055	106.298037408305	107.538796519353	38.1027232072927	24.0900316779306	98.8098837173074	49.3181649556792	23.4914891328129	61.464972806561	29.5767952560757	111.787842223117	47.7918895910611	1.22760624363864	0.00447963782922785	0.178287421527022	Aspm	1	139382510	139421829	+	11590	protein_coding	abnormal spindle microtubule assembly [Source:MGI Symbol;Acc:MGI:1334448]	-	253	63	95	101	79	33	24	103	57	28	69	34	0.879930172885445	0.240380635629166	0.299812537230536	0.360826372265316	0.356314329630006	0.129483937650759	0.0802492135916764	0.33516904257126	0.167929146973845	0.0790524908906898	0.206297159747697
ENSMUSG00000062098	1321.2794554819	1177.28615000384	1481.67422716177	1024.03950889387	1071.30421342697	1281.63705333621	830.102341568692	945.888789759855	943.966981870983	937.142620048286	880.107146853366	1227.43700312714	1226.20343471743	960.77414720472	0.352274524895691	0.00452620532083794	0.179650489105989	Btbd3	2	138098485	138431212	+	5776	protein_coding	BTB (POZ) domain containing 3 [Source:MGI Symbol;Acc:MGI:2385155]	-	1276	1069	1610	973	787	1110	827	986	1091	1117	988	1411	8.90501416381208	8.18451382035415	10.1954949035356	6.97502855428064	7.12257745775636	8.73939136596184	5.54870076488391	6.43813146221608	6.44959179377674	6.32800701576472	5.92730607535955
ENSMUSG00000117304	5.17742733339304	4.40518671657188	0	6.31473489554289	2.72250117770513	8.08239583184997	0	0	0	0	0	1.73981148565151	4.45037432584382	0.289968580941918	3.77903013938676	0.00456959311488075	1	Gm49861	17	28738982	28739224	+	243	processed_pseudogene	predicted gene, 49861 [Source:MGI Symbol;Acc:MGI:6270535]	-	5	4	0	6	2	7	0	0	0	0	0	2	0.829420672403772	0.7279408366169	0	1.02236344079086	0.430242546274081	1.31001769068539	0	0	0	0	0
ENSMUSG00000061080	27.9581076003224	35.2414937325751	43.2538438985114	34.7310419254859	31.308763543609	42.721235111207	18.067523758448	17.267746669044	21.6307741033681	12.5847263211498	33.8502748789756	18.2680205993409	35.8690809686185	20.278177721721	0.825228711891732	0.00457384001775711	0.180698520014846	Lsamp	16	39804723	42002042	+	17213	protein_coding	limbic system-associated membrane protein [Source:MGI Symbol;Acc:MGI:1261760]	-	27	32	47	33	23	37	18	18	25	15	38	21	0.0632292921819689	0.0822121063372599	0.0998736471550509	0.0793812083086611	0.0698491137839377	0.0977531023640961	0.0405255498254603	0.0394390137851422	0.0495927398158588	0.0285151495575321	0.0764987998589545
ENSMUSG00000007589	481.500742005552	399.770694528899	388.364300535571	400.985665866974	420.626431955443	402.96516361652	385.44050684689	329.046505971227	355.609926259371	310.423249255027	337.611952082415	345.352579901825	415.70216641816	343.914120052793	0.274054537458988	0.00458408577812742	0.180698520014846	Tinf2	14	55912146	55919277	-	4938	protein_coding	Terf1 (TRF1)-interacting nuclear factor 2 [Source:MGI Symbol;Acc:MGI:107246]	-	465	363	422	381	309	349	384	343	411	370	379	397	3.79588452321848	3.25085729329385	3.12587052790136	3.19473047248347	3.27112414662636	3.21410259486072	3.0136521199758	2.61970955728019	2.8420086700292	2.45183704135961	2.6595962892896
ENSMUSG00000038482	1402.04732188283	1211.42634705727	1079.50550836072	1089.29176948115	1312.24556765387	1041.47443433267	1024.83009763196	892.16691123394	1165.46610868947	799.549612270382	908.612641488293	868.165931340103	1189.33182479475	943.131883775692	0.334448551269717	0.00467945546901068	0.183583115535473	Tfdp1	8	13388751	13428448	+	3670	protein_coding	transcription factor Dp 1 [Source:MGI Symbol;Acc:MGI:101934]	E2F	1354	1100	1173	1035	964	902	1021	930	1347	953	1020	998	14.8718064564378	13.2546720454835	11.6907283250444	11.6770897900139	13.7309505381193	11.1770158641715	10.7813378930927	9.55711901580074	12.5324561484104	8.49704268256334	9.63078530626435
ENSMUSG00000117886	3.10645640003582	4.40518671657188	0.920294551032158	3.15736744777145	8.16750353311539	0	0	0	0	0	0	0	3.29280144142112	0	4.295833057756	0.00472724915098764	1	Gm2106	19	3303518	3305067	-	1550	processed_pseudogene	predicted gene 2106 [Source:MGI Symbol;Acc:MGI:3780274]	-	3	4	1	3	6	0	0	0	0	0	0	0	0.0780190542170774	0.114122337611553	0.0235981480916938	0.0801401019716705	0.202352784666971	0	0	0	0	0	0
ENSMUSG00000011171	197.777724135614	100.21799780201	74.5438586336048	203.123972473296	38.1150164878718	39.2573511832713	25.0937829978444	50.8439207477407	26.8221598881764	66.2795586247221	81.0625003680732	21.7476435706439	108.839320119278	45.3082610328668	1.26541613610388	0.0047292847869572	0.184633971326421	Vipr2	12	116041346	116109881	+	4463	protein_coding	vasoactive intestinal peptide receptor 2 [Source:MGI Symbol;Acc:MGI:107166]	-	191	91	81	193	28	34	25	53	31	79	91	25	1.72511322734825	0.901689206817696	0.663846626240679	1.7905677425368	0.327959924361287	0.346447494012441	0.217083143235009	0.447877342682222	0.237175305793965	0.579216823920685	0.706548696413014
ENSMUSG00000038264	1023.05964107846	1046.23184518582	1301.29649515947	929.318485460729	711.934057969891	1102.66971705953	565.111993111455	727.163998618631	927.527593552423	765.990342080649	546.949178307659	876.864988768361	1019.08504031898	734.93468240653	0.471967390198456	0.00473924550032618	0.184633971326421	Sema7a	9	57847395	57870148	+	3298	protein_coding	sema domain, immunoglobulin domain (Ig), and GPI membrane anchor, (semaphorin) 7A [Source:MGI Symbol;Acc:MGI:1306826]	-	988	950	1414	883	523	955	563	758	1072	913	614	1008	12.0758418868034	12.7384128360379	15.6822502039312	11.0858854420383	8.2897354401799	13.1685547686435	6.61562261284616	8.66819483469794	11.0988708094943	9.05860013951405	6.45127141625643
ENSMUSG00000048040	1567.72499655141	2133.21166749993	1518.48600920306	2121.75092490241	2286.90098927231	1376.31654736645	1156.32152054067	1356.47743277935	1209.59288786034	1688.03129054355	970.968411002195	1562.35071411506	1834.0651891326	1323.95704280686	0.469783394662096	0.00473995083274115	0.184633971326421	Arxes2	X	134894573	134896104	+	1532	protein_coding	adipocyte-related X-chromosome expressed sequence 2 [Source:MGI Symbol;Acc:MGI:1924226]	-	1514	1937	1650	2016	1680	1192	1152	1414	1398	2012	1090	1796	39.8362303157562	55.9130548838194	39.3944280316624	54.4868996172925	57.3244833847685	35.3836706651591	29.1411504603926	34.8097379756703	31.15896822375	42.9744348955442	24.6544504560547
ENSMUSG00000020590	1135.92755694643	1035.21887839439	1051.89667182976	1190.32752780984	1373.50184415224	949.104196254382	1049.92388062981	780.885877144545	932.718979337232	847.371572290751	948.698493318659	856.857156683369	1122.66277923117	902.742659900727	0.314041702812987	0.0048167590564321	0.187183346634037	Snx13	12	35097185	35197478	+	7866	protein_coding	sorting nexin 13 [Source:MGI Symbol;Acc:MGI:2661416]	-	1097	940	1143	1131	1009	822	1046	814	1078	1010	1065	985	5.62165009060122	5.28465058161812	5.31498335451936	5.95345392666485	6.70543346003706	4.75229366248308	5.15336284463618	3.90283843155418	4.6795003164277	4.2015389611589	4.69162465273721
ENSMUSG00000033361	1111.07590574615	1412.96363934043	1679.53755563369	1241.8978627901	1252.35054174436	1943.23888357193	884.304912844036	842.282309745591	1309.09444873584	1109.13387977067	820.423767461488	1258.75360986887	1440.17739813778	1037.33215473775	0.473213682533783	0.00490090986769774	0.189504645844962	Prrg3	X	71006230	71016328	+	6087	protein_coding	proline rich Gla (G-carboxyglutamic acid) 3 (transmembrane) [Source:MGI Symbol;Acc:MGI:2685214]	-	1073	1283	1825	1180	920	1683	881	878	1513	1322	921	1447	7.10571107941144	9.32106894575384	10.9665289000129	8.02673711769265	7.90085622186902	12.5737901603396	5.60900188687472	5.44003036964977	8.48731436485244	7.10671855932626	5.24304907117144
ENSMUSG00000027475	916.404638010568	912.974947009523	888.084241746032	982.993732072843	786.802840356782	924.857008758832	655.449611903695	686.872589724195	787.360177362598	816.329247365248	821.314564168829	762.907336458187	902.01956799243	755.038921163792	0.25665217414331	0.00491099616288153	0.189504645844962	Kif3b	2	153133333	153175310	+	5635	protein_coding	kinesin family member 3B [Source:MGI Symbol;Acc:MGI:107688]	-	885	829	965	934	578	801	653	716	910	973	922	877	6.33082742515681	6.50583397133828	6.26387400322111	6.86298879765676	5.36195976880033	6.46433701021868	4.49088816732828	4.79213685208612	5.51419517806455	5.6501487732835	5.66975894222366
ENSMUSG00000074899	127.364712401469	148.675051684301	76.3844477356691	121.032418831239	178.323827139686	128.163705333621	66.2475871143092	71.94894445435	79.6012487003945	95.6439200407382	113.131181832366	87.8604800254013	129.990693854331	85.7388936945932	0.59351355933018	0.0049432440750866	0.190303347255145	Sptbn5	2	119871974	119916159	-	11654	protein_coding	spectrin beta, non-erythrocytic 5 [Source:MGI Symbol;Acc:MGI:2685200]	-	123	135	83	115	131	111	66	75	92	114	127	101	0.42544284327229	0.512272591925893	0.260502981980127	0.408585698085072	0.587605585015566	0.433145053456286	0.219473404856762	0.242714856230927	0.269555052004238	0.320089037835669	0.377621141894961
ENSMUSG00000025422	188.458354935507	285.235839898029	265.044830697261	224.173088791773	144.292562418372	400.655907664563	80.300105593102	102.647160754873	125.458489799535	187.09293130776	131.837912686537	246.183325219689	251.310097400917	145.586654226916	0.786760952184063	0.00496599029488854	0.190733384822561	Agap2	10	126911153	126929038	+	5941	protein_coding	ArfGAP with GTPase domain, ankyrin repeat and PH domain 2 [Source:MGI Symbol;Acc:MGI:3580016]	-	182	259	288	213	106	347	80	107	145	223	148	283	1.23487489169262	1.92789145068835	1.77313807576706	1.48450062649088	0.932687048218126	2.65616663130984	0.521847267871587	0.679257332644624	0.833380073491363	1.2282485895914	0.863236424011034
ENSMUSG00000004328	109.761459467932	147.573755005158	160.131251879595	169.445386363734	106.1775459305	286.347738042685	40.150052796551	38.3727703756533	69.2184771307779	93.1269747765082	26.7239012202439	184.42001747906	163.239522781601	75.3353656297991	1.11401005884261	0.00499245983304946	0.191304094579432	Hif3a	7	16765432	16796352	-	6710	protein_coding	hypoxia inducible factor 3, alpha subunit [Source:MGI Symbol;Acc:MGI:1859778]	bHLH	106	134	174	161	78	248	40	40	80	111	30	212	0.636787412213901	0.88313001199402	0.948497845056603	0.993490434527093	0.607661491958191	1.68079425402308	0.231020463369978	0.224826542236679	0.407100962360835	0.541304231456054	0.15492672075914
ENSMUSG00000022021	182.245442135435	80.3946575774369	42.3335493474792	50.5178791643431	74.8687823868911	33.4842113033784	23.0862803580168	47.0066437101753	51.0486268839487	31.0423249255027	42.7582419523902	15.6583033708636	77.3074203191606	35.1000702001496	1.13925247188585	0.00508635376469735	0.19403445627045	Diaph3	14	86892803	87378671	-	5569	protein_coding	diaphanous related formin 3 [Source:MGI Symbol;Acc:MGI:1927222]	-	176	73	46	48	55	29	23	49	59	37	48	18	1.27393296165791	0.579679587930831	0.302127484097282	0.356881761339097	0.51626787851976	0.236813345977988	0.160052918440872	0.331840181459857	0.361750763128549	0.217402968400678	0.298670007913472
ENSMUSG00000027323	225.735831735936	44.0518671657188	65.3409131232832	82.0915536420576	137.486309474109	46.1851190391427	37.1387988368097	50.8439207477407	58.8357055611612	31.8813066802461	73.045330002	28.7068895132499	100.148599030041	46.7419918902013	1.09874954261526	0.00512003608953636	0.194102042761823	Rad51	2	118943274	118977926	+	6649	protein_coding	RAD51 recombinase [Source:MGI Symbol;Acc:MGI:97890]	-	218	40	71	78	101	40	37	53	68	38	82	33	1.3216342517647	0.266039439461433	0.390581470520514	0.485734111815058	0.794062476553223	0.273582965289344	0.215654423375186	0.300628151660514	0.349210458538882	0.18701146272306	0.427351382644478
ENSMUSG00000004221	1591.54116228502	1063.85259205211	1171.53496346394	1220.84874647163	1113.5029816814	1136.15392836291	1016.80008707265	881.614399380636	1030.49007828446	1017.68486850364	968.296020880171	1001.26150999244	1216.23906238617	986.024494019001	0.303088418605906	0.00514411124479278	0.19440257105608	Ikbkg	X	73436896	73497460	+	8110	protein_coding	inhibitor of kappaB kinase gamma [Source:MGI Symbol;Acc:MGI:1338074]	-	1537	966	1273	1160	818	984	1013	919	1191	1213	1087	1151	7.63948597673878	5.26742836331005	5.74139160383792	5.92239635614729	5.27256670117658	5.51771974731661	4.8406264618752	4.27370722699463	5.01447614336078	4.89419095521496	4.64447130321164
ENSMUSG00000047497	1340.9536793488	1588.06981132416	1153.12907244329	1489.2249795322	1291.82680882108	1081.88641349192	1033.86385951119	1126.24081052543	1290.92459848901	839.820736498061	954.934070270049	894.263103624876	1324.18179416024	1023.34119648643	0.371932385255945	0.00519392520787068	0.195526260757858	Adamts12	15	11064876	11349317	+	10921	protein_coding	a disintegrin-like and metallopeptidase (reprolysin type) with thrombospondin type 1 motif, 12 [Source:MGI Symbol;Acc:MGI:2146046]	-	1295	1442	1253	1415	949	937	1030	1174	1492	1001	1072	1028	4.7798964251512	5.83909066925148	4.19660684152395	5.36481026308233	4.54248433607852	3.90177819940411	3.65500349896742	4.05429923892301	4.66488646472653	2.99924976713448	3.40141773838472
ENSMUSG00000021890	897.765899610353	820.466025961513	952.504860318283	779.869759599547	739.159069746943	781.68313973749	704.63342657947	680.157354908456	713.815545411147	682.092166606317	747.378437459488	683.745913861044	828.574792495688	701.970474137653	0.240853662916345	0.00519757857692189	0.195526260757858	Eaf1	14	31216356	31231815	+	5490	protein_coding	ELL associated factor 1 [Source:MGI Symbol;Acc:MGI:1921677]	-	867	745	1035	741	543	677	702	709	825	813	839	786	6.36587164599997	6.00103685596268	6.89568835630232	5.58864080871659	5.17031636961008	5.60791882155461	4.95538893928602	4.8706172302885	5.13116837975636	4.84572947138288	5.29562483661519
ENSMUSG00000113497	14.4967965335005	5.50648339571485	1.84058910206432	18.9442046866287	9.52875412196795	9.23702380782854	2.00750263982755	1.91863851878267	4.32615482067362	0.838981754743317	4.45398353670732	2.60971722847726	9.92564194128414	2.69249641653529	1.87643964504767	0.00528429315667821	1	Gm18030	12	69866421	69867151	+	731	processed_pseudogene	predicted gene, 18030 [Source:MGI Symbol;Acc:MGI:5010215]	-	14	5	2	18	7	8	2	2	5	1	5	3	0.772007969225071	0.302478836008733	0.100074225833448	1.01956627679417	0.50057631409864	0.497688956555089	0.106029227716317	0.103186463639406	0.23355398917931	0.0447634536556134	0.23701739541583
ENSMUSG00000019883	605.758998006985	822.668619319799	604.633520028128	773.555024704004	688.792797959398	593.478779652983	498.864405997146	558.323808965756	687.858616487105	474.863673184718	359.881869765951	319.255407617052	681.481289945216	483.174630336288	0.496120590522682	0.00529805458750344	0.197587145597932	Echdc1	10	29189162	29223465	+	4125	protein_coding	enoyl Coenzyme A hydratase domain containing 1 [Source:MGI Symbol;Acc:MGI:1277169]	-	585	747	657	735	506	514	497	582	795	566	404	367	5.71666888172404	8.0082756729416	5.82573917798214	7.37774635727076	6.4123349096689	5.66662613340212	4.66923159199174	5.32119460165772	6.5807870565629	4.48986664150192	3.39379031678955
ENSMUSG00000048234	890.517501343602	791.832312303796	779.489484724238	854.594122530138	529.526479063648	772.446115929661	499.86815731706	642.743903792193	704.298004805665	570.507593225456	619.103711602317	480.187970039817	769.734335982514	586.118223463751	0.394092450787259	0.00530032884349614	0.197587145597932	Rnf149	1	39590377	39616486	-	2838	protein_coding	ring finger protein 149 [Source:MGI Symbol;Acc:MGI:2677438]	-	860	719	847	812	389	669	498	670	814	680	695	552	12.2151044481283	11.2036327652568	10.9164301346653	11.8468795327161	7.16517568210889	10.7201070130701	6.80032910489649	8.90374106706693	9.79369727958572	7.84038673119531	8.48594099041826
ENSMUSG00000030483	13.4613110668219	7.7090767540008	8.28265095928942	13.6819256070096	42.1987682544295	11.5462797597857	3.01125395974133	6.71523481573934	10.3827715696167	0	0	0.869905742825755	16.1466687335561	3.49652768132052	2.20231834514953	0.00531213525077093	1	Cyp2b10	7	25597045	25626049	+	2112	protein_coding	cytochrome P450, family 2, subfamily b, polypeptide 10 [Source:MGI Symbol;Acc:MGI:88598]	-	13	7	9	13	31	10	3	7	12	0	0	1	0.248119309102606	0.146570473850065	0.155868449753375	0.254864749799426	0.767286245521461	0.215323524645934	0.0550478447873775	0.125001215540445	0.194009052375086	0	0
ENSMUSG00000085411	11.3903401334647	8.81037343314377	1.84058910206432	21.0491163184763	53.08877296525	8.08239583184997	10.0375131991378	4.79659629695667	0	3.35592701897327	0	1.73981148565151	17.3769312973748	3.3216413334532	2.39558060286638	0.00531805603154244	1	Gm14319	2	167700505	167704462	+	703	lncRNA	predicted gene 14319 [Source:MGI Symbol;Acc:MGI:3649450]	-	11	8	2	20	39	7	10	5	0	4	0	2	0.630737256709896	0.503242171544543	0.104060112495378	1.17797210105348	2.90000612449464	0.452822615699216	0.551261489762642	0.268240771409694	0	0.186185403256065	0
ENSMUSG00000020914	1556.33465641795	441.619968336331	354.313402147381	613.581740683584	643.871528527263	251.708898763328	180.67523758448	395.239534869229	366.857928793123	167.796350948664	342.956732326463	211.387095506658	643.571699145972	277.485480004769	1.21376694965523	0.00533516329751763	0.197750086982068	Top2a	11	98883769	98915015	-	9013	protein_coding	topoisomerase (DNA) II alpha [Source:MGI Symbol;Acc:MGI:98790]	-	1503	401	385	583	473	218	180	412	424	200	385	243	6.72203445603811	1.96751189788252	1.56243147383982	2.67830182871778	2.74335116088964	1.09994891737915	0.773955718568343	1.72400275309038	1.60631660095844	0.726108612498688	1.48019506665603
ENSMUSG00000033105	1106.93396387943	921.785320442667	730.713873519533	1061.92791826713	626.17527087218	705.477693322905	574.145754990679	606.289771935323	655.84507081412	661.956604492477	775.883932094415	514.984199752847	858.835673383974	631.517555679977	0.444062375085306	0.0053490666373572	0.197750086982068	Lss	10	76367422	76392972	+	10787	protein_coding	lanosterol synthase [Source:MGI Symbol;Acc:MGI:1336155]	-	1069	837	794	1009	460	611	572	632	758	789	871	592	3.99473662386782	3.43136680032326	2.69233715179823	3.87302964922574	2.22918845937317	2.57588177024105	2.05498345431904	2.20966537080266	2.39940295348618	2.39341102873439	2.79798299209519
ENSMUSG00000016253	918.475608943925	966.938484287529	834.707157786167	911.426736590024	912.037894531218	833.641398656525	753.817241255245	834.60775567046	812.451875322505	777.736086647055	687.69505806761	736.810164173414	896.204546799231	767.186363522715	0.224024946881562	0.00535270612332355	0.197750086982068	Nelfcd	2	174257597	174269295	+	2883	protein_coding	negative elongation factor complex member C/D, Th1l [Source:MGI Symbol;Acc:MGI:1926424]	-	887	878	907	866	670	722	751	870	939	927	772	847	12.4019536004566	13.467662960073	11.5072689887991	12.4375140335962	12.1484198679991	11.3887995520533	10.0950453452881	11.381112605056	11.1213014331308	10.5214611324415	9.27898028371876
ENSMUSG00000032839	155.322820001791	179.511358700304	174.85596469611	175.760121259277	112.983798874763	159.338660685042	86.3226135125847	133.345377055395	97.7710989472237	108.228646361888	128.274725857171	139.184918852121	159.628787369548	115.521230097731	0.469315729306923	0.00538184019899642	0.197810919087608	Trpc1	9	95587135	95632428	-	8030	protein_coding	transient receptor potential cation channel, subfamily C, member 1 [Source:MGI Symbol;Acc:MGI:109528]	-	150	163	190	167	83	138	86	139	113	129	144	160	0.752985890638045	0.8976652738966	0.865461346575818	0.861115209438228	0.540321414433495	0.781535905345023	0.415045668095515	0.652843921789316	0.480504611909801	0.525672343246661	0.621404710113372
ENSMUSG00000020090	14.4967965335005	8.81037343314377	0.920294551032158	6.31473489554289	12.2512552996731	8.08239583184997	3.01125395974133	0.959319259391334	4.32615482067362	1.67796350948663	0	0	8.47930842412373	1.66244859154882	2.34676016199353	0.00538345655156084	1	Npffr1	10	61431271	61464344	+	3479	protein_coding	neuropeptide FF receptor 1 [Source:MGI Symbol;Acc:MGI:2685082]	-	14	8	1	6	9	7	3	1	5	2	0	0	0.162212654643152	0.101689924287385	0.0105136905841119	0.0714096913228453	0.135231452817105	0.0915016668113104	0.033417950040512	0.0108406589422831	0.0490738620552099	0.0188112012775242	0
ENSMUSG00000041828	1155.60178081333	1316.04953157585	1258.96294581199	1307.15012337738	1976.53585501392	1584.14958304259	835.121098168261	943.010831981681	891.187893058765	763.473396816419	938.899729537902	1617.15477591308	1433.07496993918	998.141287579351	0.521226848196459	0.00540237382954564	0.197810919087608	Abca8a	11	109916460	109986804	-	6272	protein_coding	ATP-binding cassette, sub-family A (ABC1), member 8a [Source:MGI Symbol;Acc:MGI:2386846]	-	1116	1195	1368	1242	1452	1372	832	983	1030	910	1054	1859	7.17247874068349	8.42566565055001	7.97791983635642	8.19928307321763	12.101806366164	9.94794683864215	5.14079464789876	5.91095398092785	5.60745551890235	4.74762388492516	5.82320601771734
ENSMUSG00000024747	2844.47857696613	3605.64532751409	3381.16218049215	3140.52815471667	2467.9473175897	2288.47264838952	2061.70521110289	2383.90835958746	3188.37610283646	1653.63303859908	1549.0954740668	1585.83816917135	2954.70570094471	2070.42605922734	0.51324836843694	0.00547687914213538	0.199799249311228	Aldh1a7	19	20670317	20704926	-	2066	protein_coding	aldehyde dehydrogenase family 1, subfamily A7 [Source:MGI Symbol;Acc:MGI:1347050]	-	2747	3274	3674	2984	1813	1982	2054	2485	3685	1971	1739	1823	53.5968747980289	70.0794562775105	65.0456795439344	59.803807621712	45.8729975663027	43.6273392541861	38.5285887357524	45.3634614538259	60.9034419208062	31.2174389111623	29.167342324217
ENSMUSG00000034311	199.848695068971	51.7609439197196	58.8988512660581	91.5636559853719	88.4812882754167	30.0203273754427	10.0375131991378	54.681197785306	65.757553274239	20.1355621138396	36.522665001	30.4467009989014	86.7622936484967	36.2635320620706	1.25822730519639	0.00548092860888966	0.199799249311228	Kif4	X	99669343	99770820	+	5514	protein_coding	kinesin family member 4 [Source:MGI Symbol;Acc:MGI:108389]	-	193	47	64	87	65	26	10	57	76	24	41	35	1.41091766830122	0.376941072497353	0.424544122360541	0.653300250929741	0.61622062190779	0.214433177101152	0.0702823408239277	0.389868551003186	0.470632042903363	0.142424742643105	0.257658627421394
ENSMUSG00000042286	2024.37408735668	2278.58282914681	2480.19381503167	2129.11811561388	2442.0835564015	2646.40732094288	1773.62858228764	1627.96478318709	2060.98015656891	2035.36973700729	1677.37019992398	2219.1295499485	2333.45995408223	1899.07383482057	0.296840874988389	0.00554665667600222	0.200827220932953	Stab1	14	30860970	30890598	-	10288	protein_coding	stabilin 1 [Source:MGI Symbol;Acc:MGI:2178742]	-	1955	2069	2695	2023	1794	2292	1767	1697	2382	2426	1883	2551	7.65996756873052	8.8934834419559	9.58158671423287	8.14189057631768	9.11551303012322	10.1313904262021	6.65608061668589	6.22101139433946	7.90579345308242	7.71615253631286	6.34230259176153
ENSMUSG00000044345	2359.87137856055	2715.79761076657	2820.70279891356	2493.26782792352	2320.93225399362	2617.54162154341	1824.81989960324	2092.2753047325	2306.70575038317	1851.6327327185	1633.72116126424	2546.21410925099	2554.6855819502	2042.56149299211	0.322850905232895	0.00558309101332284	0.200882275422361	Marveld1	19	42135839	42140142	+	4304	protein_coding	MARVEL (membrane-associating) domain containing 1 [Source:MGI Symbol;Acc:MGI:2147570]	-	2279	2466	3065	2369	1705	2267	1818	2181	2666	2207	1834	2927	21.3443624588844	25.3374657906969	26.0476073528379	22.7904621619328	20.7081715334045	23.9532612673412	16.3694691458435	19.1114444739086	21.1505928250995	16.7791916266992	14.7657211539876
ENSMUSG00000032702	1668.16708681924	1916.25622170877	1815.74114918645	1991.24640372786	1600.83069249062	2024.06284189043	1518.67574702954	1498.45668316926	1657.78252728213	1726.62445126175	1378.95330296459	1448.39306180488	1836.05073263723	1538.14762891869	0.255531579471748	0.00558981326479077	0.200882275422361	Kank1	19	25214339	25411860	+	6166	protein_coding	KN motif and ankyrin repeat domains 1 [Source:MGI Symbol;Acc:MGI:2147707]	-	1611	1740	1973	1892	1176	1753	1513	1562	1916	2058	1548	1665	10.5318131329199	12.4792387503389	11.7039696053541	12.7050958504769	9.9699604252069	12.9289658926943	9.50929645977371	9.55405240720677	10.6102751549979	10.9215131613035	8.69951477274758
ENSMUSG00000022112	2.07097093335722	6.60778007485783	6.4420618572251	1.05245581592382	1.36125058885256	1.15462797597857	0	0.959319259391334	0	0	0	0	3.11485787436585	0.159886543231889	3.76159786737181	0.00559063095281577	1	Gpc5	14	115329647	116762591	+	4453	protein_coding	glypican 5 [Source:MGI Symbol;Acc:MGI:1194894]	-	2	6	7	1	1	1	0	1	0	0	0	0	0.0181045787912973	0.0595855456875949	0.0574982948113356	0.00929838745834938	0.0117391577301372	0.0102125148001844	0	0.00846949302946394	0	0	0
ENSMUSG00000032046	2488.27157642869	3030.76846100146	2840.94927903627	2642.7165537847	2522.3973411438	2709.9118596217	2198.21539061117	2133.52603288633	2867.37541514247	2095.77642334881	1869.78228870973	1910.31301124536	2705.83584516944	2179.16476032398	0.312372507392887	0.00559598011888473	0.200882275422361	Abhd12	2	150674413	150746661	-	2823	protein_coding	abhydrolase domain containing 12 [Source:MGI Symbol;Acc:MGI:1923442]	-	2403	2752	3087	2511	1853	2347	2190	2224	3314	2498	2099	2196	34.3126308052471	43.1101880371803	39.9977325173719	36.829529328001	34.3126431976172	37.8083396270118	30.0639621606047	29.7121456151227	40.0844831471845	28.9549299987208	25.7649411255254
ENSMUSG00000112733	0	13.2155601497157	5.52176730619295	3.15736744777145	43.5600188432821	0	0	0	0	0	0	0	10.909118957827	0	6.03412812674204	0.00563798585188341	1	Gm40650	10	53364318	53390643	+	1887	lncRNA	predicted gene, 40650 [Source:MGI Symbol;Acc:MGI:5623535]	-	0	12	6	3	32	0	0	0	0	0	0	0	0	0.281223566451362	0.116302478671305	0.0658278527059297	0.886477488030538	0	0	0	0	0	0
ENSMUSG00000022360	757.975361608741	294.046213331173	274.247776207583	385.198828628116	436.961439021673	337.151368985742	247.926576018702	262.853477073225	297.639451662345	269.313143272605	301.089287081415	258.362005619249	414.263497963838	272.863990121257	0.602071764740548	0.00567849008841077	0.20307961989947	Atad2	15	57957440	57998478	-	16023	protein_coding	ATPase family, AAA domain containing 2 [Source:MGI Symbol;Acc:MGI:1917722]	-	732	267	298	366	321	292	247	274	344	321	338	297	1.84152819727259	0.736902100426592	0.680271147946911	0.945796248071079	1.04725111829923	0.828751662879898	0.597401212905667	0.644936327410323	0.733076456780702	0.655544477547484	0.730971528734349
ENSMUSG00000028211	983.711193344677	884.341233351806	1146.68701058607	1400.8186909946	886.17413334302	1174.2566515702	772.888516333607	743.472426028284	814.182337250775	818.007210874735	976.313191246244	913.401029967043	1079.33148553173	839.710785283448	0.36253583914153	0.00572198089187622	0.203172844037918	Trp53inp1	4	11156431	11174379	+	6475	protein_coding	transformation related protein 53 inducible nuclear protein 1 [Source:MGI Symbol;Acc:MGI:1926609]	-	950	803	1246	1331	651	1017	770	775	941	975	1096	1050	5.91418570577331	5.48426129375364	7.03862600918736	8.51135327529755	5.25570340716106	7.1427684923722	4.60854605441569	4.51410898172313	4.96231709932852	4.927263707598	5.86541000122541
ENSMUSG00000025229	35.2065058670727	33.0389003742891	29.449425633029	63.1473489554289	40.8375176655769	70.4323065346926	39.1463014766372	1.91863851878267	6.92184771307779	12.5847263211498	31.1778847569512	13.0485861423863	45.3520008383482	17.4663308214975	1.3798068511592	0.00573297511764284	0.203172844037918	Pitx3	19	46124124	46136765	-	1526	protein_coding	paired-like homeodomain transcription factor 3 [Source:MGI Symbol;Acc:MGI:1100498]	Homeobox	34	30	32	60	30	61	39	2	8	15	35	15	0.898122358505894	0.869378882525754	0.767017133255577	1.62800993520432	1.0276763310413	1.8178610961458	0.990428326659395	0.0494294265533459	0.179007041772032	0.321645654871429	0.794769339674181
ENSMUSG00000031841	2068.89996242386	1850.17842096019	2390.00494903051	2073.33795736992	2188.89094687492	1801.21964252656	1853.92868788074	1638.5172950404	1825.63733432427	1630.14154946627	1642.62912833766	1826.80205993409	2062.08864653099	1736.2760091639	0.248368063043287	0.00573776530052102	0.203172844037918	Cdh13	8	119010472	120051660	+	11233	protein_coding	cadherin 13 [Source:MGI Symbol;Acc:MGI:99551]	-	1998	1680	2597	1970	1608	1560	1847	1708	2110	1943	1844	2100	7.16986287441369	6.61387356762404	8.45640571716367	7.26157456810279	7.48307190872071	6.31559443711788	6.37212249647374	5.73458794641027	6.41388780290321	5.66002051286729	5.68843437005793
ENSMUSG00000042628	1074.83391441239	1010.99035145325	1152.20877789226	1088.23931366522	1147.53424640271	1059.94848194832	1003.75131991378	867.224610489765	1010.58976610936	895.19353231112	948.698493318659	949.937071165725	1088.95918096236	945.899132218067	0.20319573398309	0.00575064381469053	0.203172844037918	Zfyve1	12	83593332	83643996	-	8343	protein_coding	zinc finger, FYVE domain containing 1 [Source:MGI Symbol;Acc:MGI:3026685]	-	1038	918	1252	1034	843	918	1000	904	1168	1067	1065	1092	5.01517664828223	4.865895786512	5.48898072476818	5.1316689212512	5.2819582501318	5.0038678504127	4.6450536653858	4.0865451065592	4.78030119604957	4.1848812527801	4.42338721304458
ENSMUSG00000026672	2355.72943669383	3225.69797320976	2657.81066338087	2620.6149816503	2670.77365532873	2296.55504422137	2115.90778237824	2175.73608029954	2421.78146861309	2120.94587599111	2307.16347201439	1999.04339701359	2637.86362574748	2190.09634605166	0.268331717534635	0.00575843406965514	0.203172844037918	Optn	2	5025453	5068862	-	3753	protein_coding	optineurin [Source:MGI Symbol;Acc:MGI:1918898]	-	2275	2929	2888	2490	1962	1989	2108	2268	2799	2528	2590	2298	24.435091032327	34.5130366799606	28.1467492986032	27.4714205133371	27.3281398636968	24.1013634953331	21.7673229937387	22.791588537101	25.4658980594789	22.0414148481366	23.9138110613822
ENSMUSG00000022945	260.942337603009	83.6985476148658	59.8191458170902	118.927507199391	88.4812882754167	70.4323065346926	34.1275448770684	62.3557518604367	62.2966294177001	41.1101059824226	95.3152476855366	50.4545330838938	113.716855507411	57.609968817843	0.981425132700599	0.00579426871074055	0.203764685948532	Chaf1b	16	93680789	93703003	+	4681	protein_coding	chromatin assembly factor 1, subunit B (p60) [Source:MGI Symbol;Acc:MGI:1314881]	-	252	76	65	113	65	61	34	65	72	49	107	58	2.17006640868692	0.717988216761425	0.507907160913939	0.999539903178672	0.725879194445536	0.592620387250266	0.281483702805099	0.523702715213243	0.525204595534519	0.342529832619187	0.792086717250158
ENSMUSG00000041592	375.881224404334	278.628059823172	328.54515471848	400.985665866974	236.857602460346	340.615252913677	153.573951946808	193.782490397049	246.590824778396	294.482595914904	236.061127445488	271.410591761636	326.918826697831	232.65026370738	0.490689470921672	0.00581923211131097	0.203764685948532	Sdk2	11	113667200	113957872	-	15469	protein_coding	sidekick cell adhesion molecule 2 [Source:MGI Symbol;Acc:MGI:2443847]	-	363	253	357	381	174	295	153	202	285	351	265	312	0.945922400828293	0.723270326045162	0.844142171215899	1.01981893290603	0.587999073681579	0.867251721477812	0.383302958028186	0.492492067810524	0.629096519951793	0.742481847721956	0.59362369581715
ENSMUSG00000032852	12.4258256001433	6.60778007485783	0	0	5.44500235541026	2.30925595195713	1.00375131991378	0	0	0	0	0	4.46464399706142	0.167291886652296	4.26470440976507	0.00582366086564182	1	Rspo4	2	151684847	151716588	+	2371	protein_coding	R-spondin 4 [Source:MGI Symbol;Acc:MGI:1924467]	-	12	6	0	0	4	2	1	0	0	0	0	0	0.204014397362244	0.111908239117191	0	0	0.0881897416656277	0.0383604625940289	0.0163448682962099	0	0	0	0
ENSMUSG00000022807	1712.69296188642	2290.69709261738	2747.99952938202	2217.52440415148	2409.41354226904	2820.75614531564	1788.68485208635	1673.05278837849	1952.82628605207	1907.8445102863	1647.08311187437	2172.15463983591	2366.513945937	1856.94103141891	0.349708841433033	0.00582467482440727	0.203764685948532	Osbpl11	16	33005441	33063682	+	5091	protein_coding	oxysterol binding protein-like 11 [Source:MGI Symbol;Acc:MGI:2146553]	-	1654	2080	2986	2107	1770	2443	1782	1744	2257	2274	1849	2497	13.0961467489243	18.0676888852704	21.4534097059097	17.1364860881412	18.1743882909001	21.8225634048233	13.5649307848005	12.9197316618727	15.1378125894834	14.6159930133577	12.5852372804772
ENSMUSG00000079553	293.042387070046	71.5842841442931	105.833873368698	129.452065358629	147.015063596077	76.2054464145854	36.1350475168959	90.1760103827853	81.331710628664	29.3643614160161	109.567995003	56.5438732836741	137.188853325388	67.1864997051726	1.03021259170893	0.00587118425749763	0.204581479302266	Kifc1	17	34094633	34109635	-	3414	protein_coding	kinesin family member C1 [Source:MGI Symbol;Acc:MGI:109596]	-	283	65	115	123	108	66	36	94	94	35	123	65	3.34144289516901	0.841961446570294	1.2320942874471	1.49177020512585	1.6536738992995	0.879155733668601	0.408650433008581	1.03842335420594	0.940154001901997	0.335463667773541	1.24844435114373
ENSMUSG00000057440	1461.06999348352	1737.84615968761	1384.12300475237	1695.50631945327	967.849168674174	1354.37861582286	848.16986532714	921.905808275072	1258.04582185189	1298.74375634266	1122.40385125024	927.319521852255	1433.4622103123	1062.76477081654	0.431822705633538	0.00587285547793724	0.204581479302266	Mpp7	18	7347959	7626866	-	20164	protein_coding	membrane protein, palmitoylated 7 (MAGUK p55 subfamily member 7) [Source:MGI Symbol;Acc:MGI:1922989]	-	1411	1578	1504	1611	711	1173	845	961	1454	1548	1260	1066	2.82072955970143	3.46076950957272	2.72822866650251	3.30810423904582	1.84324279526413	2.64549361333686	1.62402608148756	1.79744996103229	2.4621946309757	2.51209021004008	2.16531682425812
ENSMUSG00000034317	253.693939336259	69.3816907860072	108.594757021795	99.9833025127624	138.847560062962	62.3499107028426	40.150052796551	92.094648901568	76.1403248438557	56.2117775678023	81.0625003680732	35.666135455856	122.141860070438	63.554239988951	0.942875863085684	0.00589489044548037	0.204915843607975	Trim59	3	68942621	68952088	-	3352	protein_coding	tripartite motif-containing 59 [Source:MGI Symbol;Acc:MGI:1914199]	-	245	63	118	95	102	54	40	96	88	67	91	41	2.94627444699037	0.8311490354839	1.28761971538508	1.17349144941612	1.5906908937872	0.732613882423016	0.462454447855773	1.08013324468362	0.896423688301112	0.654051214108286	0.940729961841074
ENSMUSG00000035078	972.320853211212	1017.59813152811	900.04807090945	1095.60650437669	1097.16797461517	1195.03995513782	977.653785596017	832.689117151678	911.088205233864	864.99018914036	759.849591362268	873.385365797058	1046.29691496307	869.942709046874	0.265684350600384	0.00592933562517497	0.205679290728438	Mtmr9	14	63757100	63781431	-	3738	protein_coding	myotubularin related protein 9 [Source:MGI Symbol;Acc:MGI:2442842]	-	939	924	978	1041	806	1035	974	868	1053	1031	853	1004	10.1259882700415	10.9313812150392	9.56993918999427	11.5311272994818	11.2715950545946	12.5917602727138	10.0979365915799	8.75770956004712	9.61886293701709	9.02527267135988	7.90746590635488
ENSMUSG00000058290	332.390834803833	121.142634705727	120.558586185213	183.127311970744	189.213831850507	94.6794940302425	64.2400844744816	95.9319259391334	118.536642086457	69.6354856436953	160.343407321463	57.4137790264998	173.518782257711	94.3502207486218	0.878741087065618	0.00595406659466072	0.20610326739543	Espl1	15	102204701	102232792	+	8749	protein_coding	extra spindle pole bodies 1, separase [Source:MGI Symbol;Acc:MGI:2146156]	-	321	110	131	174	139	82	64	100	137	83	180	66	1.47896446929961	0.556002359205902	0.547674473656237	0.823476416419383	0.830512200565758	0.426226874983214	0.283487906588191	0.431073865129762	0.534683537646367	0.310427823025149	0.712921451338778
ENSMUSG00000046080	107.690488534575	109.028371235154	123.319469838309	108.402949040153	93.926290630827	130.472961285578	96.3601267117224	61.3964326010453	55.3747817046223	87.254102493305	73.045330002	100.039160424962	112.140088427433	78.9116556562762	0.509364322249763	0.0060609503682506	0.206900022707369	Clec9a	6	129385825	129401726	+	3293	protein_coding	C-type lectin domain family 9, member a [Source:MGI Symbol;Acc:MGI:2444608]	-	104	99	134	103	69	113	96	64	64	104	82	115	1.27307131691395	1.3294923099372	1.48841037310805	1.29510752907958	1.09533507035796	1.56052994527483	1.12977635654726	0.732990512436376	0.663625255375938	1.03343358661231	0.862878634437635
ENSMUSG00000070730	1115.21784761286	1292.92230131385	1048.21549362563	1107.18351835185	947.430409841385	1056.48459802039	862.222383805933	1047.57663125534	974.250065615698	902.74436810381	765.194371606317	711.582897631468	1094.57569479433	877.261786336427	0.319787352965816	0.00607812945959323	0.206900022707369	Rmdn3	2	118967482	118987515	-	3537	protein_coding	regulator of microtubule dynamics 3 [Source:MGI Symbol;Acc:MGI:1915059]	-	1077	1174	1139	1052	696	915	859	1092	1126	1076	859	818	12.2741596604729	14.6782879383477	11.7787250631837	12.3151870959387	10.2864095796215	11.7644445831997	9.4117651866948	11.643879131055	10.8702114683305	9.95447075305192	8.41561187933653
ENSMUSG00000020572	1346.13110668219	2108.98314055879	2371.59905800987	1932.30887803612	2951.19127663236	2517.08898763328	1602.9908579023	1324.81989721943	1660.37822017453	1511.84512204746	1170.50687344668	2102.56218040985	2204.55040792544	1562.18385853338	0.496610373561477	0.00607826411903023	0.206900022707369	Nampt	12	32869544	32903348	+	5054	protein_coding	nicotinamide phosphoribosyltransferase [Source:MGI Symbol;Acc:MGI:1929865]	-	1300	1915	2577	1836	2168	2180	1597	1381	1919	1802	1314	2417	10.3685789636863	16.75621431616	18.6504279442139	15.041729467813	22.4240303916004	19.6158282396878	12.2456729957086	10.3054877418956	12.965056071502	11.6670353164425	9.00923098093979
ENSMUSG00000026873	114.938886801325	90.3063276897236	81.906215041862	65.2522605872766	102.093794163942	64.6591666547998	41.1538041164648	53.7218785259147	61.4313984535654	49.4999235298557	77.4993135387073	60.0234962549771	86.5261084898216	57.2216357365808	0.593356043192983	0.00609009595272646	0.206900022707369	Phf19	2	34783769	34804038	-	5039	protein_coding	PHD finger protein 19 [Source:MGI Symbol;Acc:MGI:1921266]	-	111	82	89	62	75	56	41	56	71	59	87	69	0.887952522196743	0.719634307919645	0.646033841883143	0.5094571541627	0.778048264124342	0.505392814187813	0.315320696952344	0.419134855679969	0.481114728811088	0.383132167635037	0.598277249305835
ENSMUSG00000024781	2117.56777935775	2249.94911548909	2173.73572953796	1806.01418012527	2045.9596350454	2315.02909183703	1597.97210130273	1684.56461949118	2238.35250421653	1601.61616980499	1168.725280032	1520.59523845942	2118.04258856542	1635.30431888448	0.373137573730593	0.00613494196750736	0.207567636136794	Lipa	19	34469718	34504874	-	6780	protein_coding	lysosomal acid lipase A [Source:MGI Symbol;Acc:MGI:96789]	-	2045	2043	2362	1716	1503	2005	1592	1756	2587	1909	1312	1748	12.1583528566657	13.3254240559596	12.742651914233	10.4796776413102	11.5882783873994	13.4483832525765	9.09968479449255	9.76798373453043	13.0287093886438	9.21334211561677	6.70550877452067
ENSMUSG00000098708	54.8807297339662	39.646680449147	34.971192939222	42.0982326369526	43.5600188432821	63.5045386788212	29.1087882774995	17.267746669044	28.5526218164459	32.7202884349894	19.5975275615122	39.145758427159	46.4435655468985	27.7321218644417	0.73862503468621	0.00628389131052678	0.210446498218597	Gm27252	7	63546204	63549973	+	1589	lncRNA	predicted gene 27252 [Source:MGI Symbol;Acc:MGI:5521095]	-	53	36	38	40	32	55	29	18	33	39	22	45	1.34450709123829	1.00189213950986	0.87472053027109	1.04230885719395	1.05272688477887	1.57407052378047	0.707273001371365	0.427227025980902	0.709128115918501	0.803122278330951	0.479762586919745
ENSMUSG00000030978	1092.43716734593	563.863899721201	444.502268148532	625.158754658746	726.90781444727	459.54193443947	392.466766086286	470.066437101753	561.534895723435	398.516333503076	436.490386597317	404.506170413976	652.068639793525	443.930164904307	0.554430057042127	0.00632627387608928	0.211293947670415	Rrm1	7	102090902	102118978	+	11012	protein_coding	ribonucleotide reductase M1 [Source:MGI Symbol;Acc:MGI:98180]	-	1055	512	483	594	534	398	391	490	649	475	490	465	3.8618676113475	2.05610895224592	1.60431834079609	2.2334723297408	2.53492250679337	1.6436232024408	1.37601615942178	1.67818558894837	2.01239466023354	1.41145933486836	1.54190448354515
ENSMUSG00000031486	663.746184140987	526.41981263034	831.025979582038	577.798242942175	552.667739074141	654.674062379848	369.380485728269	516.113761552537	573.648129221321	479.897563713178	380.370194034805	542.821183523271	634.388670124922	477.03855296223	0.411832519967331	0.00633510355454542	0.211293947670415	Adgra2	8	27575611	27613464	+	5775	protein_coding	adhesion G protein-coupled receptor A2 [Source:MGI Symbol;Acc:MGI:1925810]	-	641	478	903	549	406	567	368	538	663	572	427	624	4.47421825785727	3.66031341716015	5.71933298295051	3.93623202151764	3.67505360435569	4.46494860705809	2.4694987436806	3.51350355386825	3.92009148113316	3.24104457210891	2.56214367975449
ENSMUSG00000095362	364.49088427087	313.869553555747	309.218969146805	399.93321005105	247.747607171167	248.245014835392	261.979094497495	244.62641114479	272.547753702438	179.54209551507	228.043957079415	220.086152934916	313.917539838505	234.470910812354	0.423626770676973	0.00635129953237773	0.211293947670415	Gm14325	2	177473584	177482129	-	1616	protein_coding	predicted gene 14325 [Source:MGI Symbol;Acc:MGI:3702875]	zf-C2H2	352	285	336	380	182	215	261	255	315	214	256	253	8.78036220726845	7.79912478958902	7.6051457463825	9.7364934119872	5.88734741692992	6.05037785094219	6.25910346077468	5.95126013449984	6.65585511366012	4.33324635467959	5.48941674610603
ENSMUSG00000018001	1200.12765588051	1235.65487399841	1741.19729055284	1253.47487676526	1025.02169340598	1571.44867530683	864.22988644576	927.66172383142	1194.01873050592	1018.52385025839	810.625003680732	1218.73794569888	1337.82084431831	1005.63285673685	0.412080885969346	0.00638384018890317	0.211642927148003	Cyth3	5	143608202	143696005	+	9437	protein_coding	cytohesin 3 [Source:MGI Symbol;Acc:MGI:1335107]	-	1159	1122	1892	1191	753	1361	861	967	1380	1214	910	1401	4.95063155481151	5.25776616881031	7.33325517576572	5.22562379445454	4.17110050199666	6.55857613219308	3.53575509492425	3.86458291077845	4.99320956245214	4.20945329356953	3.34145049495738
ENSMUSG00000045216	769.365701742205	751.084335175506	732.554462621598	772.50256888808	739.159069746943	775.909999857597	606.26579722792	678.238716389673	606.526905858441	680.414203096831	481.921018671732	698.534311489081	756.762689671988	625.316825455613	0.27516805328304	0.00640206265049501	0.211764323471344	Hs6st1	1	36107481	36145527	+	5542	protein_coding	heparan sulfate 6-O-sulfotransferase 1 [Source:MGI Symbol;Acc:MGI:1354958]	-	743	682	796	734	543	672	604	707	701	811	541	803	5.40422493619014	5.44202107042459	5.25358988010317	5.48390436744674	5.12180383781295	5.51427150637111	4.22360598504322	4.81130625935826	4.31902938394597	4.78845374028284	3.38265991997451
ENSMUSG00000048070	2.07097093335722	1.10129667914297	2.76088365309647	7.36719071146671	1.36125058885256	1.15462797597857	0	0	0	0	0	0	2.63603675698242	0	3.99760117463774	0.00643704946544335	1	Pirt	11	66802807	66820702	+	4200	protein_coding	phosphoinositide-interacting regulator of transient receptor potential channels [Source:MGI Symbol;Acc:MGI:2443635]	-	2	1	3	7	1	1	0	0	0	0	0	0	0.019195164132773	0.010529144243923	0.0261265211015181	0.069009532253383	0.0124463022315002	0.0108276972393384	0	0	0	0	0
ENSMUSG00000055555	24.8516512002866	19.8233402245735	8.28265095928942	12.6294697910858	4.08375176655769	18.4740476156571	0	2.877957778174	6.05661674894306	4.19490877371659	10.6895604880976	3.47962297130302	14.6908185929083	4.54977779337237	1.68380540818544	0.00645731194655282	1	Ct55	X	52726793	52740408	+	1427	protein_coding	cancer/testis antigen 55 [Source:MGI Symbol;Acc:MGI:1922263]	-	24	18	9	12	3	16	0	3	7	5	12	4	0.677951136854772	0.557815910890386	0.230689674757623	0.348191052715037	0.109897272681782	0.509895763478304	0	0.0792879869520734	0.167497654187881	0.114653414934315	0.291396859507731
ENSMUSG00000102785	12.4258256001433	6.60778007485783	4.60147275516079	9.47210234331434	5.44500235541026	3.4638839279357	0	1.91863851878267	0	2.51694526422995	3.56318682936585	1.73981148565151	7.0026778428037	1.62309701633833	2.09970150775945	0.00646431421815091	1	Gm2447	3	52647137	52684077	+	2058	lncRNA	predicted gene 2447 [Source:MGI Symbol;Acc:MGI:3780614]	-	12	6	5	9	4	3	0	2	0	3	4	2	0.235042826115588	0.128928296864364	0.0888657180323745	0.181074574425786	0.10160246719592	0.0662920239143167	0	0.0366517516620048	0	0.047699831810865	0.067350715665295
ENSMUSG00000041870	2370.22623322733	2245.54392877252	2511.48382976676	2262.7800042362	1953.39459500343	2219.19496983081	1789.68860340626	1890.81826026032	2224.50880879037	1894.42080221041	1822.57006322063	1921.62178590209	2260.43726013951	1923.93805396502	0.232992170754257	0.00651446912226831	0.213702378813042	Ankrd13a	5	114912738	114944261	+	5983	protein_coding	ankyrin repeat domain 13a [Source:MGI Symbol;Acc:MGI:1915670]	-	2289	2039	2729	2150	1435	1922	1783	1971	2571	2258	2046	2209	15.4219011315104	15.0709486003858	16.6837684306301	14.8792071881772	12.5378344558335	14.6089759643716	11.5490249553985	12.4244659868059	14.6729600808151	12.3494011494314	11.8498873152664
ENSMUSG00000118665	289.93593067001	267.615093031742	292.653667228226	288.372893563125	281.778871892481	285.193110066706	222.832793020858	266.690754110791	251.782210563204	197.999694119423	232.497940616122	231.394927591651	284.258261075382	233.866386670342	0.282742399379475	0.00652377839066336	0.213702378813042	Lin54	5	100589900	100648493	-	5625	protein_coding	lin-54 DREAM MuvB core complex component [Source:MGI Symbol;Acc:MGI:2140902]	-	280	243	318	274	207	247	222	278	291	236	261	266	2.00653449067921	1.91040793161739	2.06782705678149	2.01691859599221	1.92370047290067	1.99691610952705	1.52947867842305	1.86394193492203	1.76646535581198	1.37287323926254	1.60785016493446
ENSMUSG00000024056	165.677674668577	60.5713173528634	59.8191458170902	52.6227907961908	74.8687823868911	55.4221428469712	29.1087882774995	37.413451116262	48.4529339915445	9.22879930217649	68.5913464652927	26.0971722847727	78.1636423114306	36.482081906258	1.10028728796314	0.0066032023642689	0.21459756480485	Ndc80	17	71803095	71833852	-	6493	protein_coding	NDC80 kinetochore complex component [Source:MGI Symbol;Acc:MGI:1914302]	-	160	55	65	50	55	48	29	39	56	11	77	30	0.993312051226203	0.374592995586973	0.36616562763563	0.318848909225549	0.442799293928314	0.336187242176285	0.173087447894517	0.226531872162007	0.294494566488348	0.0554355353218523	0.410934795495789
ENSMUSG00000078945	245.41005560283	176.207468662875	173.935670145078	145.238902597487	132.041307118699	176.658080324721	100.375131991378	113.199672608177	155.74157354425	132.559117249444	128.274725857171	127.876144195386	174.915247408615	126.337727574301	0.470195740310832	0.00662987209521909	0.214617686665864	Naip2	13	100280571	100338600	-	4846	protein_coding	NLR family, apoptosis inhibitory protein 2 [Source:MGI Symbol;Acc:MGI:1298226]	-	237	160	189	138	97	153	100	118	180	158	144	147	1.97140594075137	1.46008768714739	1.42655333955049	1.17911458328108	1.04635235846331	1.43579823483262	0.799704554897106	0.918351009142374	1.26830515461055	1.06687770745275	1.0296904296761
ENSMUSG00000116009	4.14194186671443	2.20259335828594	3.68117820412863	4.20982326369526	4.08375176655769	0	0	0	0	0	0	0.869905742825755	3.05321474323033	0.144984290470959	3.72160934208367	0.00664057009676594	1	Gm49503	15	82113534	82117732	-	653	lncRNA	predicted gene, 49503 [Source:MGI Symbol;Acc:MGI:6155190]	-	4	2	4	4	3	0	0	0	0	0	0	1	0.246920947496621	0.135443815695181	0.224055923688363	0.253633809200795	0.240158358525119	0	0	0	0	0	0
ENSMUSG00000034206	68.3420408007881	23.1272302620024	20.2464801227075	36.8359535573335	53.08877296525	17.3194196396785	15.0562697987066	19.1863851878267	32.0135456729848	5.87287228320322	8.90796707341463	11.3087746567348	36.4933162246267	15.3909691121451	1.24421859540095	0.00672770736296807	0.216932356594178	Polq	16	36832148	36915779	+	9685	protein_coding	polymerase (DNA directed), theta [Source:MGI Symbol;Acc:MGI:2155399]	-	66	21	22	35	39	15	15	20	37	7	10	13	0.274697960640407	0.0958875087572546	0.0830869230693606	0.14963347210336	0.210501218948862	0.070433136404576	0.0600211916318747	0.0778826070422363	0.130447800626387	0.0236504483588822	0.0357789811149141
ENSMUSG00000028284	1562.54756921802	1362.30399209986	1512.04394734584	1664.98510079148	1614.44319837914	1409.80075866983	1415.28936107842	1199.14907423917	1331.59045380334	1287.83699353099	1339.75824784156	1306.59842572428	1521.02076108403	1313.37042603629	0.211724571728313	0.00682954965154497	0.218857898126262	Map3k7	4	31964097	32023467	+	6423	protein_coding	mitogen-activated protein kinase kinase kinase 7 [Source:MGI Symbol;Acc:MGI:1346877]	-	1509	1237	1643	1582	1186	1221	1410	1250	1539	1535	1504	1502	9.47027177648208	8.51675478824189	9.35641037485784	10.198326018202	9.65242420606395	8.64496294298228	8.5073474466359	7.33976577537812	8.18154568932355	7.82008405654039	8.11404679861912
ENSMUSG00000028978	1672.30902868595	2241.13874205595	1785.37142900239	2174.3737156986	1606.27569484603	1655.73651755327	1370.1205516823	1542.58536910126	1428.49632178643	1828.14124358569	1405.67720418483	1275.28181898256	1855.86752130703	1475.05041822051	0.33143862707012	0.00685383719324824	0.218857898126262	Nos3	5	24569808	24589472	+	4132	protein_coding	nitric oxide synthase 3, endothelial cell [Source:MGI Symbol;Acc:MGI:97362]	-	1615	2035	1940	2066	1180	1434	1365	1608	1651	2179	1578	1466	15.7551788858421	21.7794278443393	17.1731924762157	20.7028596760149	14.928333460628	15.7824431106213	12.8022209406772	14.6769509090044	13.6433626338197	17.2559105498282	13.2334865404297
ENSMUSG00000069300	74.5549536008597	63.8752073902923	62.5800294701867	81.0390978261338	34.0312647213141	36.9480952313141	41.1538041164648	40.291408894436	49.3181649556792	14.2626898306364	24.0515110982195	17.3981148565151	58.8381080400168	31.0792822919918	0.928569982657389	0.0069478369063693	0.221430384344772	H2bc11	13	22227384	22227846	+	463	protein_coding	H2B clustered histone 11 [Source:MGI Symbol;Acc:MGI:2448388]	-	72	58	68	77	25	32	41	42	57	17	27	20	6.26848556560536	5.53973982250464	5.37201902562532	6.88604835876089	2.82259553846117	3.14307237357901	3.43175160246839	3.42119957522359	4.20366914347054	1.20145883062269	2.0207396688217
ENSMUSG00000009378	1134.89207147975	1289.61841127642	779.489484724238	1280.83872797928	420.626431955443	794.384047473254	572.138252350852	560.242447484539	642.001375387965	813.812302101018	659.189563432683	363.620600501166	949.974862481398	601.834090209704	0.658864200527322	0.00701772711095084	0.222485546916136	Slc16a12	19	34645803	34724689	-	4170	protein_coding	solute carrier family 16 (monocarboxylic acid transporters), member 12 [Source:MGI Symbol;Acc:MGI:2147716]	-	1096	1171	847	1217	309	688	570	584	742	970	740	418	10.5946258436428	12.418330268696	7.42945532905999	12.0841152161679	3.87357578801941	7.50304890714442	5.29726598471915	5.28186020066151	6.07578661097534	7.61161201045222	6.14926570149827
ENSMUSG00000040396	647.17841667413	679.500051031213	643.285891171478	663.047164032004	643.871528527263	677.766621899419	647.419601344385	576.550874894191	549.421662225549	525.202578469317	497.064562696537	580.227130464779	659.108278889251	562.647735015793	0.22914714813275	0.00704815711804794	0.222485546916136	Abhd13	8	10027707	10042155	+	5191	protein_coding	abhydrolase domain containing 13 [Source:MGI Symbol;Acc:MGI:1916154]	-	625	617	699	630	473	587	645	601	635	626	558	667	4.85333325452988	5.25625590323678	4.92533491619064	5.02515954378323	4.76321017397386	5.14247828431225	4.81528132557356	4.36650089165516	4.17693155334995	3.94606530023707	3.72486694491721
ENSMUSG00000103897	18.6387384002149	12.1142634705727	23.0073637758039	5.26227907961908	23.1412600104936	19.6286755916356	6.02250791948265	2.877957778174	10.3827715696167	10.0677810569198	0.890796707341463	6.95924594260604	16.9654300547233	6.20017682902344	1.44205422084413	0.00707219908330469	0.222808077047058	Pcdhga8	18	37858759	37974926	+	4730	protein_coding	protocadherin gamma subfamily A, 8 [Source:MGI Symbol;Acc:MGI:1935221]	-	18	11	25	5	17	17	6	3	12	12	1	8	0.153398986092774	0.102842804242969	0.193325208996434	0.0437692593573254	0.187878642564295	0.163445577777751	0.049159005577565	0.023920498389135	0.0866272978046894	0.0830158595067739	0.00732599222194383
ENSMUSG00000021499	6.21291280007164	4.40518671657188	8.28265095928942	7.36719071146671	5.44500235541026	6.9277678558714	4.0150052796551	0.959319259391334	1.73046192826945	0.838981754743317	1.78159341468293	1.73981148565151	6.44011856644689	1.84419552039894	1.8311517815781	0.00711020781380313	1	Catsper3	13	55932381	55956811	+	1361	protein_coding	cation channel, sperm associated 3 [Source:MGI Symbol;Acc:MGI:1924106]	-	6	4	9	7	4	6	4	1	2	1	2	2	0.17770688322773	0.129970333062386	0.241876683232276	0.212961084103019	0.15363547207142	0.200483446312511	0.113897671507168	0.0277109863778126	0.0501772126642396	0.0240426779002596	0.0509212978836066
ENSMUSG00000029482	1379.26664161591	2221.31540183137	2307.17843943762	1589.20828204496	2865.43248953465	2391.23453825161	1495.58946667153	1775.69994913336	1805.73702214917	1438.85370938479	1250.67857710741	1543.21278777289	2125.60596545269	1551.62858536986	0.453788648616766	0.00711482973454044	0.223723376977143	Aacs	5	125552878	125594474	+	3854	protein_coding	acetoacetyl-CoA synthetase [Source:MGI Symbol;Acc:MGI:1926144]	-	1332	2017	2507	1510	2105	2071	1490	1851	2087	1715	1404	1774	13.9316847722347	23.143900505441	23.7931665184505	16.2227909241217	28.5515718808234	24.4373316365369	14.9826121609153	18.1136018951312	18.490361454592	14.5610729442565	12.6235932191363
ENSMUSG00000016024	8605.91971356591	10248.6668961045	10197.7839199873	6835.70052442518	6543.53158061428	9835.12109938543	5208.46559903258	5945.86076970749	9546.0932272984	6836.02333764855	4651.74040573712	4993.25896381983	8711.12062234711	6196.90705054066	0.49132522296152	0.00713018034734976	0.223779012539585	Lbp	2	158148413	158174772	+	4831	protein_coding	lipopolysaccharide binding protein [Source:MGI Symbol;Acc:MGI:1098776]	-	8311	9306	11081	6495	4807	8518	5189	6198	11033	8148	5222	5740	69.3469507608571	85.1860295182323	83.8979864326828	55.6675941195267	52.0147742232768	80.1836815060391	41.6255143215893	48.3865485299809	77.981438620236	55.189307700708	37.4565198595624
ENSMUSG00000030047	310.645640003582	289.641026614601	265.965125248294	182.07485615482	356.647654279372	290.966249946599	152.570200626894	192.823171137658	317.539763837443	163.601442174947	130.056319271854	173.111242822325	282.656758707878	188.28368997852	0.584474458495111	0.007247418615734	0.226469449677496	Arhgap25	6	87435527	87510241	-	4434	protein_coding	Rho GTPase activating protein 25 [Source:MGI Symbol;Acc:MGI:2443687]	-	300	263	289	173	262	252	152	201	367	195	146	199	2.72732372657803	2.62302497335078	2.38403031972806	1.61551408387487	3.0888387405374	2.58458158730622	1.32849791948753	1.70966286524601	2.82621396279015	1.43906326146581	1.14099767898736
ENSMUSG00000039187	95.2646629344319	15.4181535080016	38.6523711433506	46.3080559006479	24.5025105993462	23.0925595195713	16.0600211186204	20.145704447218	27.6873908523111	14.2626898306364	16.0343407321463	18.2680205993409	40.5397189342249	18.7430279300455	1.11768456394025	0.00727577546097572	0.226469449677496	Fanci	7	79041677	79100012	+	5774	protein_coding	Fanconi anemia, complementation group I [Source:MGI Symbol;Acc:MGI:2384790]	-	92	14	42	44	18	20	16	21	32	17	18	21	0.642276707733243	0.107224399297311	0.266061558844694	0.315526784116611	0.16296162949453	0.157521054399797	0.107388105937828	0.1371679427891	0.189237787145217	0.0963414337683248	0.108024762344354
ENSMUSG00000036902	83.8743228009672	38.545383770004	34.0508983881898	29.4687628458668	84.397536508859	39.2573511832713	31.116290917327	25.901620003566	24.2264669957723	26.0084343970428	40.0858518303659	19.1379263421666	51.5990425828597	27.7460984143734	0.890410939331255	0.00728462756139302	0.226469449677496	Neto2	8	86363217	86427553	-	6129	protein_coding	neuropilin (NRP) and tolloid (TLL)-like 2 [Source:MGI Symbol;Acc:MGI:1921763]	-	81	35	37	28	62	34	31	27	28	31	45	22	0.532729224830264	0.252534541337361	0.220811517875451	0.189159755564829	0.528800310178275	0.252275275865153	0.19601307956269	0.166143843437017	0.155992267923711	0.16550573067219	0.254419553669562
ENSMUSG00000044795	401.7683610713	471.354978673192	496.038763006333	433.611796160612	417.903930777737	451.45953860762	405.515533245165	383.727703756533	409.254246035724	338.109647161557	327.813188301659	354.051637330082	445.356228049466	369.745325971787	0.270169994837695	0.00736485524648697	0.228532429183363	Cyb5d1	11	69282751	69286457	-	1605	protein_coding	cytochrome b5 domain containing 1 [Source:MGI Symbol;Acc:MGI:2685586]	-	388	428	539	412	307	391	404	400	473	403	368	407	9.74468519338533	11.7926415531938	12.283534469287	10.6287578648201	9.99891719457717	11.0786569510539	9.75482107354938	9.39929033276085	10.0628446056829	8.21619944097702	7.94511844311794
ENSMUSG00000045767	1763.43174975367	1655.24890875189	1606.83428610215	1829.16820807559	1726.06574666505	1730.78733599187	1571.87456698497	1532.03285724796	1432.8224766071	1383.48091357173	1590.96291931185	1569.30996005766	1718.5893725567	1513.41394896355	0.183483053508701	0.00745068794646061	0.230534818276029	B230219D22Rik	13	55840937	55851313	+	4652	protein_coding	RIKEN cDNA B230219D22 gene [Source:MGI Symbol;Acc:MGI:1925771]	-	1703	1503	1746	1738	1268	1499	1566	1597	1656	1649	1786	1804	14.756591893387	14.2876775481918	13.7282175796541	15.4692906779509	14.2485011100768	14.6537008339266	13.0456292252088	12.9471840023526	12.1550091077027	11.5990364449905	13.3036050242246
ENSMUSG00000024791	119.08082866804	48.4570538822907	30.3697201840612	63.1473489554289	32.6700141324616	25.4018154715285	10.0375131991378	27.8202585223487	34.6092385653889	17.6186168496097	39.1950551230244	8.69905742825755	53.1877968823018	22.9966232812945	1.21061981434891	0.00745736834017863	0.230534818276029	Cdca5	19	6135013	6141807	+	2129	protein_coding	cell division cycle associated 5 [Source:MGI Symbol;Acc:MGI:1915099]	-	115	44	33	60	24	22	10	29	40	21	44	10	2.1773753584146	0.913943568002337	0.566954098116551	1.16690613486228	0.589284765117529	0.469929180326382	0.182027631424677	0.513727064981627	0.641532986717052	0.322763634132138	0.716151010441967
ENSMUSG00000009876	129.435683334826	134.358194855442	132.522415348631	105.245581592382	87.1200376865641	102.761889862092	75.2813489935331	72.9082637137413	88.2535583417418	67.1185403794654	78.3901102460488	113.087746567348	115.24063377999	82.5065947069798	0.485339449761146	0.00789519604878014	0.242558433859693	Cox4i2	2	152596093	152606957	+	788	protein_coding	cytochrome c oxidase subunit 4I2 [Source:MGI Symbol;Acc:MGI:2135755]	-	125	122	144	100	64	89	75	76	102	80	88	130	6.39432815336665	6.84661613018548	6.68414550008382	5.25453291269414	4.24564218252189	5.13628582241712	3.68848503143849	3.63745379057795	4.41986105106286	3.32203904794451	3.8697601554085
ENSMUSG00000025745	5168.10796419293	6019.68764819548	5150.88860212699	6010.57516474091	9316.39903010695	4393.35944859845	4992.65906525112	4628.71542656318	4861.73278747301	4009.49380591831	4306.11128328863	4128.57265545103	6009.83630966028	4487.88083732422	0.42114026303773	0.00798853632192209	0.243753912919093	Hadha	5	30323302	30360160	-	8730	protein_coding	hydroxyacyl-CoA dehydrogenase trifunctional multienzyme complex subunit alpha [Source:MGI Symbol;Acc:MGI:2135593]	-	4991	5466	5597	5711	6844	3805	4974	4825	5619	4779	4834	4746	23.0454106290959	27.6883929251535	23.4504231440178	27.0868342748502	40.9812678561314	19.8210114068576	22.0802769645568	20.8445816861946	21.9775587963375	17.9128112725944	19.1875708449193
ENSMUSG00000031431	3962.80288097903	5974.53448435062	6565.38132706341	5955.84746231287	6086.15138275982	6976.2622308625	3087.53906005477	3785.4737975582	5786.66468813303	3597.55376433935	2508.48352787356	5730.93903373607	5920.16329472137	4082.7756452825	0.536028190878898	0.00801521478797284	0.244115885510958	Tsc22d3	X	139440277	139501408	-	4341	protein_coding	TSC22 domain family, member 3 [Source:MGI Symbol;Acc:MGI:1196284]	TSC22	3827	5425	7134	5659	4471	6042	3076	3946	6688	4288	2816	6588	35.5369213512686	55.265273346645	60.1108597451099	53.9771863195431	53.8399337856616	63.2960092661476	27.4605685506669	34.282888414642	52.6067098461379	32.3225751808852	22.4786620775814
ENSMUSG00000016239	53.8452442672876	18.7220435454305	16.5653019185788	18.9442046866287	38.1150164878718	31.1749553514213	6.02250791948265	19.1863851878267	9.51754060548196	18.457598604353	8.01717036607317	20.0078320849924	29.5611277095365	13.534839128035	1.11944667199988	0.0081730391856709	0.247095718646421	Lonrf3	X	35592006	35625994	+	3812	protein_coding	LON peptidase N-terminal domain and ring finger 3 [Source:MGI Symbol;Acc:MGI:1921615]	-	52	17	18	18	28	27	6	20	11	22	9	23	0.54987196308993	0.197214296698873	0.172714672549385	0.195514939227843	0.383967770835368	0.32210410990057	0.0609974019889513	0.197873307766017	0.098531355036245	0.188847287956342	0.0818120380084335
ENSMUSG00000035354	1241.54707454765	1170.67836992898	1215.70910191348	1136.65228119772	843.97536508859	1200.81309501771	870.252394365243	895.044869012114	1057.31223817263	1023.55774078685	845.366075267049	847.288193512285	1134.89588128235	923.136918519362	0.298657046586912	0.00825399292201491	0.247274620683709	Uvrag	7	98534228	98790348	-	9035	protein_coding	UV radiation resistance associated gene [Source:MGI Symbol;Acc:MGI:1925860]	-	1199	1063	1321	1080	620	1040	867	933	1222	1220	949	974	5.34936400331037	5.20292389501037	5.34791235474793	4.94943850583201	3.58717996799408	5.23468528405425	3.71880939979878	3.89460661265848	4.61825289567398	4.41847739226886	3.63970050980573
ENSMUSG00000031963	552.949239206376	611.219656924349	540.212901455877	530.437731225603	400.207673122654	580.777871917219	371.387988368097	300.266928189487	635.944758639022	349.855391727963	252.986264884976	327.95446504531	535.96751230868	373.065966142476	0.522925291529438	0.00836301000629192	0.249632818611724	Bmper	9	23134372	23396496	+	4833	protein_coding	BMP-binding endothelial regulator [Source:MGI Symbol;Acc:MGI:1920480]	-	534	555	587	504	294	503	370	313	735	417	284	377	4.45385000175702	5.07830234483438	4.44253570064713	4.31791486725078	3.17994909899782	4.73300086650658	2.9668658411372	2.44251732258297	5.1928431647509	2.82332077125588	2.03624081762499
ENSMUSG00000040373	152.216363601755	64.9765040694353	13.8044182654824	172.602753811506	5.44500235541026	24.2471874955499	15.0562697987066	27.8202585223487	14.7089263902903	21.8135256233263	19.5975275615122	1.73981148565151	72.2153715998565	16.7893865636393	2.10635135289522	0.00837981751604022	0.249682193873046	Cacng5	11	107765431	107805881	-	3834	protein_coding	calcium channel, voltage-dependent, gamma subunit 5 [Source:MGI Symbol;Acc:MGI:2157946]	-	147	59	15	164	4	21	15	29	17	26	22	2	1.54552612618337	0.680522155358405	0.14310301072819	1.77113666503205	0.0545377875558694	0.249087870764123	0.151618477035656	0.285269932536746	0.151401952192555	0.221902503958943	0.198837441475085
ENSMUSG00000036777	615.078367207093	297.350103368602	298.175434534419	390.461107707735	332.145143680026	235.544107099628	176.660232304824	292.592374114357	303.696068411288	207.228493421599	270.802199031805	179.200583022106	361.459043932917	238.363325050996	0.601069203127206	0.00842162758285925	0.250086136326852	Anln	9	22243308	22300484	-	9063	protein_coding	anillin, actin binding protein [Source:MGI Symbol;Acc:MGI:1920174]	-	594	270	324	371	244	204	176	305	351	247	304	206	2.64195605640749	1.31745002456236	1.30762330041362	1.69497096762695	1.40736737579625	1.02363135768125	0.752581723550173	1.26922310497207	1.32242118719224	0.891796855533111	1.16232933198471
ENSMUSG00000028048	1194.95022854711	1347.987135271	1173.375552566	1231.37330463086	976.016672207289	1177.72053549814	967.616272396879	901.760103827854	1192.28826857765	1011.81199622044	900.59547112222	852.50762796924	1183.5705714534	971.09662335238	0.285855920084039	0.00845226965098309	0.250086136326852	Gba	3	89110235	89116273	+	2559	protein_coding	glucosidase, beta, acid [Source:MGI Symbol;Acc:MGI:95665]	-	1154	1224	1275	1170	717	1020	964	940	1378	1206	1011	980	18.1780229618453	21.152100324017	18.2242439102031	18.931102634574	14.6466567174442	18.1265552846134	14.5988863431115	13.8537605754555	18.3871150662074	15.4211934562085	13.6901581028144
ENSMUSG00000000420	2332.9487564269	2396.4215738151	2549.21590635908	2135.43285050942	2504.70108348872	2298.86430017333	2182.15536949255	1986.75018619945	2349.96729858991	1901.9716380031	1869.78228870973	1826.80205993409	2369.59741179543	2019.57147348814	0.230640330718427	0.00845408617673465	0.250086136326852	Galnt1	18	24338401	24419875	+	5519	protein_coding	polypeptide N-acetylgalactosaminyltransferase 1 [Source:MGI Symbol;Acc:MGI:894693]	-	2253	2176	2770	2029	1840	1991	2174	2071	2716	2267	2099	2100	16.4555318103622	17.4357592089258	18.3581534393345	15.2223599502208	17.4279803669204	16.4057564513128	15.265538368491	14.152390876079	16.803665732946	13.4410157344897	13.1789144405433
ENSMUSG00000031349	1071.72745801236	1136.53817287555	841.149219643392	1249.26505350157	612.562764983654	777.064627833576	600.243289308438	830.770478632895	868.691887991262	690.48198415375	481.921018671732	424.514002498968	948.051216141683	649.437110209508	0.546239089442123	0.00848251184302904	0.250477325515393	Nsdhl	X	71962163	72002120	+	2853	protein_coding	NAD(P) dependent steroid dehydrogenase-like [Source:MGI Symbol;Acc:MGI:1099438]	-	1035	1032	914	1187	450	673	598	866	1004	823	541	488	14.623445230488	15.9963276589064	11.7180148620759	17.2269852333892	8.24518444358057	10.7275040367031	8.12292403530586	11.4479106311026	12.0161849249517	9.4392834364229	6.5708732129333
ENSMUSG00000032332	768.330216275527	693.816907860072	485.915522944979	620.948931395051	696.960301492513	633.890758812233	242.907819419134	287.7957778174	725.928778909033	575.541483753916	376.807007205439	318.385501874226	649.977106463396	421.227728163191	0.624833752718643	0.00857617964263876	0.252420461424956	Col12a1	9	79506273	79626113	-	15228	protein_coding	collagen, type XII, alpha 1 [Source:MGI Symbol;Acc:MGI:88448]	-	742	630	528	590	512	549	242	300	839	686	423	366	1.96413874124553	1.82953215585896	1.26823774614146	1.60424050549629	1.75758657201327	1.63951302170124	0.615864934379822	0.742999457450806	1.8812813704961	1.47408392769016	0.962553978049841
ENSMUSG00000021904	2005.73534895646	2232.3283686228	2789.41278417847	1945.99080364313	1931.61458558179	2302.32818410126	1596.96834998282	1485.02621353778	1772.85824551205	2020.26806542191	1410.13118772154	2097.3427459529	2201.23501251399	1730.4324680215	0.347290581344767	0.00858339391458584	0.252420461424956	Sema3g	14	30939817	30952309	+	4540	protein_coding	sema domain, immunoglobulin domain (Ig), short basic domain, secreted, (semaphorin) 3G [Source:MGI Symbol;Acc:MGI:3041242]	-	1937	2027	3031	1849	1419	1994	1591	1548	2049	2408	1583	2411	17.1982751416037	19.7442327326463	24.4196651194233	16.8632544233267	16.3386502289196	19.9735239735707	13.5808610625395	12.8595334820251	15.4106432827561	17.3556783635212	12.0823846037675
ENSMUSG00000034663	697.917204541381	701.525984614073	744.518291785016	646.207870977223	600.311509683981	636.20001476419	624.333320986368	522.828996368277	611.718291643249	583.931301301349	532.696430990195	441.912117355484	671.113479394311	552.903409774154	0.28087076104163	0.0086374502128945	0.252677515727952	Bmp2k	5	97145548	97239726	+	8480	protein_coding	BMP2 inducible kinase [Source:MGI Symbol;Acc:MGI:2155456]	-	674	637	809	614	441	551	622	545	707	696	598	508	3.20387208885931	3.32189534318298	3.48949266504474	2.99800845308329	2.71851898504536	2.95488879142416	2.84254606819047	2.42387801778427	2.84680830249253	2.68568053031702	2.44361580653974
ENSMUSG00000114940	43.4903896005015	61.6726140320064	29.449425633029	41.0457768210288	28.5862623659039	45.0304910631641	24.0900316779306	21.1050237066093	34.6092385653889	14.2626898306364	31.1778847569512	20.0078320849924	41.545826585939	24.2087834370848	0.78053145715159	0.00864778553376017	0.252677515727952	Gm21378	13	120560623	120561868	-	1246	processed_pseudogene	predicted gene, 21378 [Source:MGI Symbol;Acc:MGI:5434733]	-	42	56	32	39	21	39	24	22	40	17	35	23	1.35875880939854	1.98752385727985	0.939380533987168	1.29600566190141	0.881030382679227	1.4234163786546	0.74645937843301	0.665908791432154	1.09616671646918	0.44644898762304	0.973369191286357
ENSMUSG00000042489	234.019715469365	59.4700206737204	54.2973785108973	75.7768187465147	69.4237800314808	35.7934672553356	24.0900316779306	45.0880051913927	75.2750938797209	35.2372336992193	41.8674452450488	23.4874550562954	88.130196781219	40.840877458268	1.10990284306251	0.00864903312924472	0.252677515727952	Clspn	4	126450728	126487696	+	7186	protein_coding	claspin [Source:MGI Symbol;Acc:MGI:2445153]	-	226	54	59	72	51	31	24	47	87	42	47	27	1.26774629799806	0.332314210203415	0.300313198300222	0.414863873273886	0.370998878094537	0.19618232404145	0.129430613070906	0.246672511220364	0.413396411072545	0.191250703330732	0.226640875432832
ENSMUSG00000050147	62.1291280007164	42.9505704865759	74.5438586336048	51.5703349802669	72.1462812091859	41.5666071352284	31.116290917327	23.9829814847833	32.0135456729848	46.1439965108825	50.7754123184634	31.3166067417272	57.4844634075964	35.8914722743614	0.676704103507416	0.00873776484360639	0.25302662799315	F2rl3	8	73488508	73490502	+	1995	protein_coding	coagulation factor II (thrombin) receptor-like 3 [Source:MGI Symbol;Acc:MGI:1298207]	-	60	39	81	49	53	36	31	25	37	55	57	36	1.21232615575409	0.864498158974732	1.48508646261261	1.01698258057617	1.38874530162002	0.820625474981436	0.602187551197858	0.472614692483746	0.633276666198776	0.902112608633552	0.990055520279837
ENSMUSG00000024410	1132.8211005464	1267.59247769356	1140.24494872884	1127.18017885441	1038.63419929451	1310.50275273567	938.50748411938	900.800784568462	1056.4470072085	1138.49824118668	983.439564904976	855.117345197717	1169.49594297556	978.801737864286	0.256684210679366	0.00879927249109297	0.254238408507867	Rmc1	18	12301774	12323715	+	6182	protein_coding	regulator of MON1-CCZ1 [Source:MGI Symbol;Acc:MGI:1916528]	-	1094	1151	1239	1071	763	1135	935	939	1221	1357	1104	983	7.13344711721655	8.23357960271315	7.33080936633667	7.17332989744806	6.45186349580484	8.34934208022099	5.86132212113286	5.7285762957183	6.74405844697451	7.18276752384307	6.18824738007326
ENSMUSG00000020843	484.607198405588	569.370383116916	521.807010435233	539.909833568917	472.35395433184	407.583675520434	430.60931624301	435.530943763665	450.785332314191	381.736698408209	406.203298547707	344.482674158999	499.272009229822	408.22471057263	0.291851475486561	0.00885676072607364	0.254238408507867	Timm22	11	76297778	76307118	+	3183	protein_coding	translocase of inner mitochondrial membrane 22 [Source:MGI Symbol;Acc:MGI:1929742]	-	468	517	567	513	347	353	429	454	521	455	456	396	5.92680091413425	7.18284128534541	6.51562439534561	6.67330632346569	5.69878758158605	5.04340054258344	5.22316364791222	5.37934408323347	5.58902107024375	4.67752073613738	4.96427461629475
ENSMUSG00000023025	1203.23411228054	903.063276897236	935.939558399704	1226.11102555124	1078.11046637123	895.991309359368	918.432457721104	862.428014192809	745.829091084131	828.913973686398	938.899729537902	793.354037457089	1040.40829147655	847.976217279906	0.295287785687699	0.00890775149777371	0.255257428571856	Larp4	15	99867946	99914239	+	10843	protein_coding	La ribonucleoprotein domain family, member 4 [Source:MGI Symbol;Acc:MGI:2443114]	-	1162	820	1017	1165	792	776	915	899	862	988	1054	912	4.31984132774995	3.34431179342164	3.43068714786881	4.44873771512632	3.81825876075461	3.25460028059132	3.27027757062041	3.12694573104514	2.71451640264954	2.98159361862827	3.36836190566478
ENSMUSG00000029816	1587.39922041831	1283.01063120156	1245.15852754651	370.464447205183	1369.41809238568	1216.97788668141	508.901919196284	441.286859320013	1094.51716963042	771.024232609109	292.181320008	399.286735957022	1178.73813423977	584.533039453475	1.0117232425009	0.00899986739477582	0.255840926386304	Gpnmb	6	49013480	49047863	+	6514	protein_coding	glycoprotein (transmembrane) nmb [Source:MGI Symbol;Acc:MGI:1934765]	-	1533	1165	1353	352	1006	1054	507	460	1265	919	328	459	9.48648939094814	7.90898108466616	7.59730676550439	2.23745981146983	8.073091217153	7.35831288595382	3.01629062699863	2.66330060357589	6.63097565563234	4.61645621244256	1.74483226478547
ENSMUSG00000020827	1963.28044482264	2112.28703059622	2203.18515517099	2110.17391092725	1878.52581261654	2266.53471684593	1801.73361924523	1881.22506766641	1808.33271504157	1791.22604637698	1940.15522858971	1849.41960924756	2088.99784516326	1845.34871436124	0.179398201738904	0.00904037966938563	0.255840926386304	Mink1	11	70453707	70505309	+	6286	protein_coding	misshapen-like kinase 1 (zebrafish) [Source:MGI Symbol;Acc:MGI:1355329]	-	1896	1918	2394	2005	1380	1963	1795	1961	2090	2135	2178	2126	12.1583623148344	13.4932507749517	13.9302653712771	13.2068831213522	11.4761004985325	14.2014051319519	11.0663157017043	11.7655796173175	11.3528937043671	11.1138483405204	12.0063525788947
ENSMUSG00000039055	54.8807297339662	26.4311202994313	29.449425633029	9.47210234331434	20.4187588327885	12.7009077357642	2.00750263982755	17.267746669044	7.78707867721251	0	8.01717036607317	13.9184918852121	25.5588407630489	8.16633170622822	1.65017235796657	0.00904206924465575	0.255840926386304	Eme1	11	94535822	94544790	-	2762	protein_coding	essential meiotic structure-specific endonuclease 1 [Source:MGI Symbol;Acc:MGI:3576783]	-	53	24	32	9	15	11	2	18	9	0	9	16	0.773505346842012	0.384264207019349	0.423775577606086	0.134920881306397	0.28389465625797	0.1811149936486	0.0280620439756073	0.245787018205522	0.111263699841468	0	0.112913645506209
ENSMUSG00000038342	1871.12223828824	1673.97095229732	1649.16783544963	2421.7008324407	2252.86972455099	2190.32927043134	1759.57606380885	1272.05733795291	1207.86242593207	1723.26852424277	1662.22665589917	1743.29110862281	2009.86014224304	1561.3803527431	0.364000891110209	0.00905233113328974	0.255840926386304	Mlxip	5	123532861	123595995	+	8326	protein_coding	MLX interacting protein [Source:MGI Symbol;Acc:MGI:2141183]	bHLH	1807	1520	1792	2301	1655	1897	1753	1326	1396	2054	1866	2004	8.74848538729687	8.07327130112954	7.87247371360661	11.4430170825151	10.3908535684792	10.3613493856239	8.15940497552726	6.00644116769506	5.7251078708082	8.07244316768057	7.76609728915159
ENSMUSG00000032418	11888.4086429371	12699.0520071976	8796.17531876536	14482.8444829276	10138.5943857739	8232.49746872718	10503.2538115777	9577.84348576307	8541.56007793799	7090.23480933578	7039.96637811959	5404.72438017642	11039.5953843881	8026.26382381843	0.459935079664374	0.00912548638179931	0.257026733526337	Me1	9	86463424	86578006	-	3848	protein_coding	malic enzyme 1, NADP(+)-dependent, cytosolic [Source:MGI Symbol;Acc:MGI:97043]	-	11481	11531	9558	13761	7448	7130	10464	9984	9872	8451	7903	6213	120.269575560699	132.517817453753	90.8534834105078	148.072792100645	101.179898098986	84.2635710834791	105.384234950625	97.8542334102562	87.6001289626416	71.8644327293824	71.167959248182
ENSMUSG00000026678	7855.19275022392	8682.62301836318	12454.3461591182	7050.40151087364	9822.78424916011	8089.32359970584	6912.83534024617	6601.07582387177	6918.38678922125	5652.22008170573	5978.13670296856	9023.53227033156	8992.44521457415	6847.69783472417	0.393121294183488	0.00922186040703164	0.257977239264279	Rgs5	1	169483070	169523382	+	4546	protein_coding	regulator of G-protein signaling 5 [Source:MGI Symbol;Acc:MGI:1098434]	-	7586	7884	13533	6699	7216	7006	6887	6881	7996	6737	6711	10373	67.2658340812921	76.6936752134127	108.88655831359	61.0155991947311	82.9768084009069	70.0851642778223	58.7102096268524	57.0863448259253	60.0589888630111	48.492891355064	51.1546834317927
ENSMUSG00000036770	5.17742733339304	2.20259335828594	5.52176730619295	2.10491163184763	5.44500235541026	2.30925595195713	0	0.959319259391334	0	0	0	1.73981148565151	3.79349298951449	0.449855124173807	3.07009934559061	0.00923228627686582	1	Stpg3	2	25102219	25104649	-	1945	protein_coding	sperm tail PG rich repeat containing 3 [Source:MGI Symbol;Acc:MGI:1921722]	-	5	2	6	2	4	2	0	1	0	0	0	2	0.103624279380009	0.0454729108734979	0.112834332777765	0.0425765751691823	0.107505335470027	0.0467622914192507	0	0.019390566817585	0	0	0
ENSMUSG00000121104	1.03548546667861	6.60778007485783	5.52176730619295	2.10491163184763	2.72250117770513	1.15462797597857	0	0	0	0	0.890796707341463	0.869905742825755	3.19117893887678	0.293450408361203	3.3096285681038	0.00928347217666257	1	ENSMUSG00000121104	3	95857991	95858385	-	395	lncRNA	novel transcript	-	1	6	6	2	2	1	0	0	0	0	1	1	0.102050239693224	0.671732746700912	0.555601967728486	0.209649211909012	0.26468085758127	0.115129945329674	0	0	0	0	0.0877264385058083
ENSMUSG00000055322	33388.193387585	42676.3476134693	37642.8080208683	41251.0057051339	44537.3967660782	48470.1278036043	32259.5636707088	26798.5835110969	32646.0295077672	34909.1918331147	32906.0303691937	41043.8927580048	41327.6465494565	33427.215274981	0.30605835508187	0.00938621085931137	0.261782146758052	Tns1	1	73949390	74163608	-	16465	protein_coding	tensin 1 [Source:MGI Symbol;Acc:MGI:104552]	-	32244	38751	40903	39195	32718	41979	32139	27935	37731	41609	36940	47182	78.9402145049487	104.079104045205	90.8663425242364	98.5664846646102	103.875863281077	115.945993933968	75.6455881730673	63.9877811403443	78.2476390955923	82.6925732795227	77.7432603807957
ENSMUSG00000028560	943.327260144211	593.598910058061	765.685066458755	607.267005788041	762.300329757436	674.302737971483	538.010707473784	543.934020074886	643.731837316234	486.609417751124	611.977337943585	610.67383146368	724.413551696332	572.489525337216	0.339617714729514	0.00938964913115306	0.261782146758052	Usp1	4	98812047	98823780	+	3733	protein_coding	ubiquitin specific peptidase 1 [Source:MGI Symbol;Acc:MGI:2385198]	-	911	539	832	577	560	584	536	567	744	580	687	702	9.83720024173803	6.38517994626117	8.15220245889319	6.39997322960653	7.84187057286056	7.11443230341527	5.56441841506782	5.72842430884947	6.80533655349671	5.08406350948485	6.37714572331334
ENSMUSG00000061273	1368.91178694912	1284.1119278807	1082.26639201382	1318.72713735254	1275.49180175485	1124.60764860312	1218.55410237532	970.83109050403	1068.56024070638	1045.37126641017	958.497257099415	741.159692887543	1242.35278242569	1000.49560833048	0.312489806877979	0.00943695997330886	0.261882652877443	Mmgt1	X	55630872	55643429	-	4234	protein_coding	membrane magnesium transporter 1 [Source:MGI Symbol;Acc:MGI:2384305]	-	1322	1166	1176	1253	937	974	1214	1012	1235	1246	1076	852	12.5861158869637	12.1783951798157	10.1593538832167	12.2535111828279	11.5685351445078	10.4614888678993	11.1117078022203	9.01446109818738	9.95980340676632	9.62959788363904	8.80620946947063
ENSMUSG00000030225	735.194681341811	703.728577972358	476.712577434658	801.971331733947	473.715204920693	580.777871917219	419.568051723958	529.544231184016	590.952748504016	454.728111070878	440.053573426683	380.148809614855	628.683374220114	469.165920920734	0.422660999624068	0.00945027323086902	0.261882652877443	Dera	6	137731544	137834338	+	8127	protein_coding	deoxyribose-phosphate aldolase (putative) [Source:MGI Symbol;Acc:MGI:1913762]	-	710	639	518	762	348	503	418	552	683	542	494	437	3.52159341970771	3.47706623869086	2.33135881663848	3.88226382997991	2.23840474240934	2.81464171131122	1.99323728082578	2.56164490685764	2.8696247284243	2.18227757662869	2.10631966846787
ENSMUSG00000030096	7807.5604187567	5150.76456835168	3815.54120857933	7018.82783639592	4211.70932190984	4111.63022245968	2834.5937274365	3157.11968265688	2519.55256756031	4731.85709675231	4985.78917099017	3671.87214046751	5352.67226274219	3650.13073097728	0.552310538262834	0.00946146983578109	0.261882652877443	Slc6a6	6	91661034	91736047	+	8457	protein_coding	solute carrier family 6 (neurotransmitter transporter, taurine), member 6 [Source:MGI Symbol;Acc:MGI:98488]	-	7540	4677	4146	6669	3094	3561	2824	3291	2912	5640	5597	4221	35.9390125196084	24.4564493367716	17.9317463736138	32.6516190562477	19.1246551067635	19.1487768063135	12.9408064361365	14.6764717094156	11.7573569174483	21.8224615430423	22.9333009513088
ENSMUSG00000020183	42.4549041338229	69.3816907860072	127.92094259347	127.347153726782	114.345049463615	110.844285693942	53.1988199554301	71.94894445435	57.1052436328917	28.5253796612728	57.0109892698537	80.0313283399695	98.7156710662733	57.9701175522946	0.768500338139081	0.00959676950279144	0.264049100350983	Cpm	10	117465405	117523257	+	5964	protein_coding	carboxypeptidase M [Source:MGI Symbol;Acc:MGI:1917824]	-	41	63	139	121	84	96	53	75	66	34	64	92	0.277113285015385	0.467138089695176	0.852485078195074	0.840055674311805	0.736260132004237	0.732013334490483	0.344390540695276	0.474278828724886	0.377868737825116	0.186544412668782	0.371851838602756
ENSMUSG00000030278	53516.9953743505	78592.936210359	65766.08920586	64363.9878786368	52613.6965097405	61412.352786348	38251.9590505941	44675.4979098544	69495.351039301	48368.137142707	38632.9624006919	46389.463547669	62711.0096608825	47635.5618484696	0.39667872315861	0.00959916314318377	0.264049100350983	Cidec	6	113401595	113412721	-	1856	protein_coding	cell death-inducing DFFA-like effector c [Source:MGI Symbol;Acc:MGI:95585]	-	51683	71364	71462	61156	38651	53188	38109	46570	80320	57651	43369	53327	1122.48583110756	1700.37056533295	1408.33773240267	1364.33629994221	1088.61019165345	1303.23004052635	795.724189207719	946.320778594639	1477.67998236582	1016.41212314522	809.709119108604
ENSMUSG00000082129	1.03548546667861	7.7090767540008	0	5.26227907961908	2.72250117770513	1.15462797597857	0	0	0	0	0	0	2.98066174233036	0	4.16195461628658	0.00966041745185106	1	Gm14502	X	8696561	8696673	-	113	unprocessed_pseudogene	predicted gene 14502 [Source:MGI Symbol;Acc:MGI:3705819]	-	1	7	0	5	2	1	0	0	0	0	0	0	0.356724289193127	2.73944106877289	0	1.83211147575353	0.92521184729736	0.402445384117002	0	0	0	0	0
ENSMUSG00000038970	1387.55052534933	1343.58194855442	1182.57849807632	1642.88352865708	1551.82567129192	1147.7002081227	1190.44906541774	974.668367541595	853.117730636837	1241.69299702011	1251.56937381476	1029.96839950569	1376.02006334196	1090.24432232279	0.335587454133405	0.00966845355627078	0.264992473425688	Lmtk2	5	144037254	144125022	+	8114	protein_coding	lemur tyrosine kinase 2 [Source:MGI Symbol;Acc:MGI:3036247]	-	1340	1220	1285	1561	1140	994	1186	1016	986	1480	1405	1184	6.65703621760208	6.64916626890086	5.79265608351381	7.96577864290344	7.3444534242572	5.571046393245	5.66451413829826	4.72246572585238	4.14931660253424	5.96853404497597	6.00024404852859
ENSMUSG00000053702	120.116314134718	52.8622405988626	55.2176730619295	84.1964652739052	62.617527087218	72.7415624866497	41.1538041164648	56.5998363040887	24.2264669957723	35.2372336992193	60.5741760992195	53.9341560551968	74.6252971072139	45.2876122116602	0.722956362303277	0.00967978783980965	0.264992473425688	Nebl	2	17348720	17736275	-	15235	protein_coding	nebulette [Source:MGI Symbol;Acc:MGI:1921353]	-	116	48	60	80	46	63	41	59	28	42	68	62	0.306921035952971	0.139328879525755	0.144051708075321	0.21742419088693	0.157835614776885	0.188054393799077	0.104292812073703	0.14605608763715	0.0627552747032768	0.0902085693557363	0.15466571304667
ENSMUSG00000026880	3150.982275103	3102.35274514575	3046.17496391644	3280.50477823453	2700.72116828349	2597.91294595178	2576.62963821866	2651.55843295765	2959.08989734075	2287.90324518503	2097.82624578915	1917.27225718796	2979.7748127725	2415.04661944653	0.303408539886431	0.00968170595389114	0.264992473425688	Stom	2	35203998	35226988	-	2827	protein_coding	stomatin [Source:MGI Symbol;Acc:MGI:95403]	-	3043	2817	3310	3117	1984	2250	2567	2764	3420	2727	2355	2204	43.3897620649662	44.0659770808457	42.8264233407976	45.6532109021142	36.6864334045436	36.1944601739469	35.1894954257925	36.8741773611606	41.3080752761272	31.5646001998178	28.8664047609004
ENSMUSG00000002055	391.413506404514	60.5713173528634	70.8626804294761	142.081535149715	142.931311829519	70.4323065346926	51.1913173156025	81.5421370482634	94.3101750906848	25.1694526422995	106.895604880976	26.0971722847727	146.382109616797	64.2009765437664	1.18967255509939	0.00978193796123819	0.267291860343817	Spag5	11	78192355	78213283	+	5624	protein_coding	sperm associated antigen 5 [Source:MGI Symbol;Acc:MGI:1927470]	-	378	55	77	135	105	61	51	85	109	30	120	30	2.70930321632205	0.432473741171091	0.500789291384006	0.993913960263873	0.975963599589542	0.493253206386646	0.351429199723684	0.570011639245599	0.661783367845598	0.174548815552561	0.73937289921325
ENSMUSG00000056069	176.032529335363	237.880082694882	160.131251879595	268.376233060573	160.627569484603	265.56443447507	149.558946667152	176.514743728005	193.811735966178	126.686244966241	129.165522564512	133.095578652341	211.435350155014	151.472128757405	0.481704296609937	0.0100262715299085	0.272477048250816	Otulinl	15	27655155	27681665	-	3241	protein_coding	OTU deubiquitinase with linear linkage specificity like [Source:MGI Symbol;Acc:MGI:2687281]	-	170	216	174	255	118	230	149	184	224	151	145	153	2.11437013125578	2.9472507430074	1.96372124045968	3.25777798048985	1.90323584879096	3.22726181215702	1.78164107584596	2.14115891782701	2.35995460686065	1.52454019684056	1.55030292052458
ENSMUSG00000058056	4907.16562658992	5110.01659122339	4941.06144449165	4877.08025099096	3970.76796768293	4783.6237044792	4113.37290900665	4381.21105764022	4243.09264811668	4225.95109864209	3562.29603265851	2976.81745194973	4764.95259757634	3917.12353300232	0.2828642904641	0.0100981231568723	0.273662459302278	Palld	8	61964467	62355724	-	10292	protein_coding	palladin, cytoskeletal associated protein [Source:MGI Symbol;Acc:MGI:1919583]	-	4739	4640	5369	4634	2917	4143	4098	4567	4904	5037	3999	3422	18.5608583300567	19.937034883946	19.0810929373952	18.6430337618836	14.8158401825691	18.3062989295406	15.4306832324938	16.7356021944954	16.2699173281331	16.0144908902342	13.4641586568177
ENSMUSG00000007891	21588.8364947823	26122.7572292713	18759.2841282395	19286.2528268039	18756.6718637995	18193.4730174943	16335.0489802768	15994.7300118317	21304.5820298893	16379.4407978538	13366.4045936587	12303.9468265275	20451.2125933985	15947.3588733396	0.358873078052582	0.0101907830958255	0.275268086999863	Ctsd	7	141929648	141941775	-	2351	protein_coding	cathepsin D [Source:MGI Symbol;Acc:MGI:88562]	-	20849	23720	20384	18325	13779	15757	16274	16673	24623	19523	15005	14144	357.473395027132	446.174166804163	317.136626366092	322.739177850253	306.375973407458	304.793920323722	268.259222778871	267.46763099488	357.62098758281	271.728310540303	221.162232183311
ENSMUSG00000034520	487.713654805624	528.622405988626	565.981148884777	469.395293902022	402.930174300359	527.664985022205	374.399242327838	361.663360790533	401.467167358512	439.626439485498	326.031594886976	485.407404496771	497.051277150602	398.099201557688	0.32107147672087	0.0102299577083906	0.275523130329297	Gjc1	11	102690405	102710526	-	5003	protein_coding	gap junction protein, gamma 1 [Source:MGI Symbol;Acc:MGI:95718]	-	471	480	615	446	296	457	373	377	464	524	366	558	3.79491042249166	4.24280527598417	4.49628916018531	3.6911754609245	3.09279291109355	4.15404398984332	2.88929115698721	2.84197960773466	3.16681096405337	3.42721813752964	2.53500124221162
ENSMUSG00000024526	30.0290785336796	202.638588962307	81.906215041862	55.7801582439622	1437.48062182831	98.1433779581782	95.3563753918086	62.3557518604367	40.665855314332	45.3050147561391	88.1888740268049	98.2993489393103	317.663006761383	71.6952033814719	2.14687184330833	0.0102497678273947	0.275523130329297	Cidea	18	67476674	67500855	+	1115	protein_coding	cell death-inducing DNA fragmentation factor, alpha subunit-like effector A [Source:MGI Symbol;Acc:MGI:1270845]	-	29	184	89	53	1056	85	95	65	47	54	99	113	1.04841748492007	7.29768849480153	2.91960944327278	1.96816423825792	49.5083763741253	3.46680530443391	3.30188328195498	2.19861202682797	1.43932096972799	1.58474669919433	3.07671962131806
ENSMUSG00000021669	1591.54116228502	1615.60222830274	1548.85572938712	1802.8568126775	1542.29691716996	1656.89114552924	1463.46942443428	1346.88424018543	1412.05693346787	1326.43015424919	1602.54327650729	1357.922864551	1626.34066589193	1418.21781556584	0.197767084250626	0.0102503901736881	0.275523130329297	Cert1	13	96679126	96776675	+	8236	protein_coding	ceramide transporter 1 [Source:MGI Symbol;Acc:MGI:1915268]	-	1537	1467	1683	1713	1133	1435	1458	1404	1632	1581	1799	1561	7.52261185907619	7.87691468486004	7.47441828793066	8.61194721345641	7.19123042724828	7.92357106137597	6.86047467469614	6.42925838442507	6.76610103591557	6.28140065417467	7.56906821690383
ENSMUSG00000024590	1018.91769921175	321.578630309748	366.277231310799	406.247944946593	495.495214342334	277.110714234856	301.125395974133	359.74472227175	348.688078546293	206.389511666856	332.267171838366	203.557943821227	480.937905726013	291.962137353104	0.720494876368562	0.0102901327703166	0.276140908235352	Lmnb1	18	56840885	56886496	+	2962	protein_coding	lamin B1 [Source:MGI Symbol;Acc:MGI:96795]	-	984	292	398	386	364	240	300	375	403	246	373	234	13.391251574599	4.35953494285861	4.91482024232474	5.39588375080469	6.4240063644556	3.68478015437309	3.92508602940382	4.77481251606215	4.64573736220799	2.71763430691233	4.36366469184783
ENSMUSG00000035722	938.149832810818	821.567322640656	954.345449420347	977.731452993224	890.257885109577	907.537589119154	823.076082329296	637.947307495237	615.179215499788	929.591784255596	762.521981484293	719.412049316899	914.931588682296	747.954736730185	0.290894683867983	0.0103204508327058	0.276365317151714	Abca7	10	79832328	79851406	+	6752	protein_coding	ATP-binding cassette, sub-family A (ABC1), member 7 [Source:MGI Symbol;Acc:MGI:1351646]	-	906	746	1037	929	654	786	820	665	711	1108	856	827	5.40887430080183	4.88594708901949	5.61766637073222	5.69696582909296	5.06331501325307	5.29389723437558	4.70646028419095	3.71449109686536	3.59560378821219	5.3696785784148	4.3930781083507
ENSMUSG00000039167	2336.05521282694	2172.85834794908	2270.36665739633	2196.475287833	1972.45210324737	1958.24904725965	1943.26255535307	1923.43511507962	1842.94195360696	1896.0987657199	1753.087920048	1991.21424532815	2151.07610941873	1891.67342585595	0.186086213145207	0.0103523384495558	0.276365317151714	Adgrl4	3	151143524	151250723	+	5704	protein_coding	adhesion G protein-coupled receptor L4 [Source:MGI Symbol;Acc:MGI:2655562]	-	2256	1973	2467	2087	1449	1696	1936	2005	2130	2260	1968	2289	15.9430241226202	15.2964247355702	15.8197367777741	15.1496732622171	13.27940149377	13.5217133547081	13.1534238719999	13.256991266253	12.7507211701213	12.9649213264889	11.9556494103919
ENSMUSG00000028614	819.069004142778	938.304770629811	690.220913274118	934.580764540348	823.556606255802	719.333229034647	738.760971456539	762.65881121611	650.653685029312	602.388899905702	654.735579895976	651.559401376491	820.844214646251	676.792891480021	0.278656627753049	0.010382359125867	0.276365317151714	Ndc1	4	107224981	107273543	+	4924	protein_coding	NDC1 transmembrane nucleoporin [Source:MGI Symbol;Acc:MGI:1920037]	-	791	852	750	888	605	623	736	795	752	718	735	749	6.47544417972162	7.65180539448703	5.57125246884525	7.46715653627182	6.42283793059342	5.75380840707816	5.7925894576586	6.08918535862334	5.2147615962525	4.77141688846018	5.17245699821259
ENSMUSG00000041025	707.236573741489	662.980600844069	673.655611355539	720.932233907813	590.782755562013	756.281324265961	561.0969878318	545.852658593669	597.009365252959	620.007516755312	473.903848305659	639.38072097693	685.311516612814	572.875182952721	0.258895146375217	0.010524720826762	0.278803577270992	Iffo2	4	139257859	139347693	+	6216	protein_coding	intermediate filament family orphan 2 [Source:MGI Symbol;Acc:MGI:2140675]	-	683	602	732	685	434	655	559	569	690	739	532	735	4.42915442658242	4.2828005640822	4.30734537079082	4.56288895690804	3.64979403275073	4.79198762957206	3.48508826355299	3.45232259489309	3.79029268346692	3.8902220939262	2.9657068512887
ENSMUSG00000033910	791.110896542456	802.845279095226	969.070162236862	744.086261858137	736.436568569238	913.310728999047	674.520886982057	783.76383492272	564.995819579974	500.033125827017	574.563876235244	795.963754685566	826.143316216828	648.97354970543	0.349131248800397	0.0107038248610083	0.282131496079392	Gucy1a1	3	81999734	82053096	-	6968	protein_coding	guanylate cyclase 1, soluble, alpha 1 [Source:MGI Symbol;Acc:MGI:1926562]	-	764	729	1053	707	541	791	672	817	653	596	645	915	4.41973612724182	4.6265978539098	5.52751397931372	4.20118306284229	4.05862341136836	5.16242476586252	3.73743897743554	4.42205382605996	3.19992427832432	2.79884650328114	3.20759233213509
ENSMUSG00000038145	4839.85907125581	5931.58391386404	6322.42356559092	6013.73253218868	5342.90856124632	6221.13553457252	4344.23571258682	3698.17574495359	5061.60114018813	4069.90049225983	3453.61883436285	6278.10974597347	5778.60719645305	4484.27361172078	0.36584031505339	0.0107188393849426	0.282131496079392	Snrk	9	121946332	121998768	+	5780	protein_coding	SNF related kinase [Source:MGI Symbol;Acc:MGI:108104]	-	4674	5386	6870	5714	3925	5388	4328	3855	5850	4851	3877	7217	32.5965768215952	41.2079373305591	43.4748927256749	40.932920480536	35.4978014336126	42.3921206656284	29.0183285219374	25.1539766840973	34.559121163562	27.4627737893687	23.243180592452
ENSMUSG00000027380	154.287334535113	138.763381572014	83.7468041439263	230.487823687316	58.5337753206603	51.9582589190355	78.2926029532745	48.925282228958	85.6578654493376	74.6693761721553	55.2293958551707	17.3981148565151	119.629563029677	60.0287729192352	0.996659736318159	0.0107471382507397	0.28242519450947	Acoxl	2	127680796	127965793	+	3179	protein_coding	acyl-Coenzyme A oxidase-like [Source:MGI Symbol;Acc:MGI:1921371]	-	149	126	91	219	43	45	78	51	99	89	62	20	1.88932584370704	1.75275971496825	1.04703327723605	2.85242294372272	0.707078384085856	0.643735381640439	0.950861042140444	0.605047900431063	1.06335757426345	0.916094851016216	0.675816445110804
ENSMUSG00000002297	241.268113736116	123.345228064013	109.515051572827	157.868372388572	141.570061240667	108.535029741985	80.300105593102	112.240353348786	137.571723297421	80.5422484553585	94.4244509781951	83.5109513112725	147.01697612403	98.0983054973559	0.583907056885142	0.0107667014955061	0.282488758823972	Dbf4	5	8446973	8472716	-	8728	protein_coding	DBF4 zinc finger [Source:MGI Symbol;Acc:MGI:1351328]	-	233	112	119	150	104	94	80	117	159	96	106	96	1.07609919914824	0.567473585282011	0.498702843207254	0.711601501237909	0.622885519559955	0.489777139102979	0.355212490653655	0.505569928717202	0.622038189924885	0.359912938099945	0.42084165676423
ENSMUSG00000060568	193.6357822689	199.334698924878	167.493608287853	172.602753811506	202.826337739032	161.647916636999	164.615216465859	174.596105209223	111.614794373379	151.85569760854	118.475962076415	104.388689139091	182.923516278195	137.591077478751	0.41165824701805	0.010839402491089	0.283691169125775	Fam78b	1	166828986	166918871	+	6325	protein_coding	family with sequence similarity 78, member B [Source:MGI Symbol;Acc:MGI:2443050]	-	187	181	182	164	149	140	164	182	129	181	133	120	1.19176932093912	1.26549493347514	1.05249605955207	1.0736028416969	1.23144599786132	1.00659066825786	1.00483857197968	1.0852279443094	0.696408146264655	0.936394832668437	0.728649556822552
ENSMUSG00000031383	212.274520669115	185.017842096019	253.081001533843	169.445386363734	95.2875412196795	197.441383892335	81.3038569130158	125.670822980265	119.401873050592	190.448858326733	106.895604880976	108.738217853219	185.424612629121	122.0765390008	0.604662667573639	0.0108745329828999	0.283691169125775	Dusp9	X	72683025	72687120	+	2722	protein_coding	dual specificity phosphatase 9 [Source:MGI Symbol;Acc:MGI:2387107]	-	205	168	275	161	70	171	81	131	138	227	120	125	3.03582592180705	2.7293769943101	3.69533821604867	2.44905246718472	1.34431038062493	2.85688910995328	1.15321392401007	1.81506960774672	1.73111383691627	2.72884394167947	1.5276389365082
ENSMUSG00000034731	463.897489072016	447.126451732046	395.726656943828	510.44107072305	409.736427244622	393.728139808691	320.196671052494	395.239534869229	312.348378052635	386.770588936669	372.353023668732	374.9293751579	436.776039254042	360.306261956277	0.277898955658406	0.0110014840413834	0.285732811414011	Dgkh	14	78796190	78970216	-	16975	protein_coding	diacylglycerol kinase, eta [Source:MGI Symbol;Acc:MGI:2444188]	-	448	406	430	485	301	341	319	412	361	461	418	431	1.06384744719369	1.05769053105965	0.926548789579611	1.18302055291514	0.926928735261417	0.913545094914901	0.728272447185278	0.915371829961921	0.72615959656574	0.888652784144849	0.853284963870045
ENSMUSG00000042225	222.629375335901	180.612655379447	147.247128165145	235.750102766935	185.130080083949	155.874776757107	144.540190067584	175.555424468614	141.897878118095	145.982825325337	107.786401588317	126.136332709734	187.874019748081	140.316508712947	0.421859692990711	0.0110173254650737	0.285732811414011	Ammecr1	X	141634142	141749724	-	5437	protein_coding	Alport syndrome, mental retardation, midface hypoplasia and elliptocytosis chromosomal region gene 1 [Source:MGI Symbol;Acc:MGI:1860206]	-	215	164	160	224	136	135	144	183	164	174	121	145	1.59400710059721	1.33391108243777	1.07639152597757	1.70588212890467	1.30758282777872	1.12917129569705	1.02639880690917	1.26940985841772	1.02995719840987	1.04720300244107	0.771176223723581
ENSMUSG00000024486	77.6614100008956	109.028371235154	119.63829163418	99.9833025127624	255.915110704282	93.5248660542639	131.491422908705	74.826902232524	51.0486268839487	52.855850548829	70.3729398799756	53.0642503123711	125.958558690256	72.2766654610588	0.800128815451347	0.0110290749565644	0.285732811414011	Hbegf	18	36637980	36648858	-	4834	protein_coding	heparin-binding EGF-like growth factor [Source:MGI Symbol;Acc:MGI:96070]	-	75	99	130	95	188	81	131	78	59	63	79	61	0.625411326212609	0.905671943860818	0.983662978997992	0.813724314944731	2.03301618576594	0.762015432524394	1.05021357833494	0.608552522113328	0.416754240766009	0.426456626231271	0.566301926680544
ENSMUSG00000115754	0	3.30389003742891	9.20294551032158	1.05245581592382	1.36125058885256	2.30925595195713	0	0	0	0	0	0	2.87163298408067	0	4.12451530098581	0.0110569725460687	1	Gm48972	14	106479118	106505368	-	2306	lncRNA	predicted gene, 48972 [Source:MGI Symbol;Acc:MGI:6118313]	-	0	3	10	1	1	2	0	0	0	0	0	0	0	0.0575313172044363	0.15861721397279	0.0179556458595099	0.0226688939168694	0.0394417418952483	0	0	0	0	0
ENSMUSG00000040010	578.836375873342	186.119138775162	337.748100228802	170.497842179658	186.491330672801	236.698735075606	134.502676868446	148.694485205657	217.172971997816	200.516639383653	135.401099515902	196.598697878621	282.731920467562	172.147761808349	0.716507898992337	0.0110927361922578	0.286930948571165	Slc7a5	8	122607889	122634433	-	3708	protein_coding	solute carrier family 7 (cationic amino acid transporter, y+ system), member 5 [Source:MGI Symbol;Acc:MGI:1298205]	-	559	169	367	162	137	205	134	155	251	239	152	226	6.07691563523793	2.01553036255031	3.62022830149946	1.80898773868091	1.93139220712115	2.51419830719265	1.40048368011382	1.57652943131916	2.31136566820976	2.10910955359184	1.42046800644248
ENSMUSG00000061175	573.658948539948	490.077022218622	450.944330005757	474.657572981641	529.526479063648	473.397470151213	413.545543804475	343.436294862097	461.168103883807	432.075603692808	324.250001472293	451.481080526567	498.710303826805	404.326104707008	0.301631130865719	0.0112169143835281	0.289234895614074	Fnip2	3	79363281	79475103	-	8698	protein_coding	folliculin interacting protein 2 [Source:MGI Symbol;Acc:MGI:2683054]	-	554	445	490	451	389	410	412	358	533	515	364	519	2.56744699379951	2.26247075096483	2.06056489717653	2.14692796364284	2.3378671632358	2.14363010417805	1.83565386121974	1.55229312264344	2.09238919121661	1.93744235231783	1.45013880528456
ENSMUSG00000042275	127.364712401469	118.940041347441	112.275935225923	137.87171188602	103.455044752795	114.308169621878	88.3301161524122	71.94894445435	101.232022803763	102.355774078685	99.7692312222439	85.250762796924	119.035935872588	91.4811419180629	0.380017464666351	0.0112622294166459	0.289628285615411	Pelo	13	115224891	115226722	-	1600	protein_coding	pelota mRNA surveillance and ribosome rescue factor [Source:MGI Symbol;Acc:MGI:2145154]	-	123	108	122	131	76	99	88	75	117	122	112	98	3.09881930968454	2.98501239315218	2.78900612758706	3.39009327194744	2.48303729518429	2.81384782007307	2.13145255016726	1.76787433407201	2.49689650406735	2.49505895244682	2.4256360246856
ENSMUSG00000103037	22.7806802669294	27.5324169785743	33.1306038371577	36.8359535573335	31.308763543609	38.1027232072927	17.0637724385342	18.2270659284353	19.9003121750986	17.6186168496097	20.4883242688537	25.2272665419469	31.6151902318161	19.7542263670797	0.675404917173031	0.0112689145184715	0.289628285615411	Pcdhgb1	18	37813286	37974923	+	5776	protein_coding	protocadherin gamma subfamily B, 1 [Source:MGI Symbol;Acc:MGI:1935169]	-	22	25	36	35	23	33	17	19	23	21	23	29	0.153534726962277	0.191405842384335	0.227973799085269	0.250900307707937	0.208156647431253	0.259819743312379	0.114060354296284	0.124061356776983	0.135967563021874	0.118968797968719	0.137983845883876
ENSMUSG00000113737	7.24839826675025	4.40518671657188	30.3697201840612	35.7834977414097	10.8900047108205	65.8137946307783	0	0	12.1132334978861	10.0677810569198	0	9.56896317108331	25.751767041732	5.29166295431487	2.27328901627604	0.0112849037667715	0.289628285615411	BB123696	13	52883651	52911241	-	2306	lncRNA	expressed sequence BB123696 [Source:MGI Symbol;Acc:MGI:2145475]	-	7	4	33	34	8	57	0	0	14	12	0	11	0.12236292833988	0.0767084229392484	0.523436806110206	0.610491959223336	0.181351151334955	1.12408964401458	0	0	0.207301953621948	0.170279711824389	0
ENSMUSG00000115976	14.4967965335005	11.0129667914297	11.963829163418	7.36719071146671	4.08375176655769	5.77313987989284	0	2.877957778174	5.19138578480834	0	3.56318682936585	4.34952871412878	9.11627914104425	2.66367651774616	1.77604475433215	0.0113682367209336	1	Gm31462	15	80889608	80890611	-	544	lncRNA	predicted gene, 31462 [Source:MGI Symbol;Acc:MGI:5590621]	-	14	10	13	7	3	5	0	3	6	0	4	5	1.03738570864619	0.812911871773469	0.874085816264025	0.532794182838619	0.288278323744306	0.417980959606813	0	0.207985215773178	0.376605807551637	0	0.254793700072017
ENSMUSG00000034612	690.668806274631	762.097301966936	650.648247579735	672.519266375318	645.232779116116	719.333229034647	677.532140941798	568.876320819061	586.626593683342	581.414356037119	598.615387333463	564.568827093915	690.083271724564	596.272270984783	0.211474932954925	0.0114215623285951	0.292177496772321	Chst11	10	82821332	83031734	+	5527	protein_coding	carbohydrate sulfotransferase 11 [Source:MGI Symbol;Acc:MGI:1927166]	-	667	692	707	639	474	623	675	593	678	693	672	649	4.86460401678581	5.53680203194099	4.67885481930208	4.78709149012973	4.48310086529231	5.12606343340924	4.73289955544812	4.04646081217665	4.18865789792188	4.10284144078552	4.2131546656381
ENSMUSG00000023015	634.752591073986	280.830653181458	236.515699615265	314.684288961221	291.307626014449	192.822871988421	172.645227025169	248.463688182355	277.739139487246	119.974390928294	237.842720860171	134.835390137992	325.152288472466	198.583426103538	0.711967751196266	0.0114374270448593	0.292177496772321	Racgap1	15	99518377	99549537	-	7079	protein_coding	Rac GTPase-activating protein 1 [Source:MGI Symbol;Acc:MGI:1349423]	-	613	255	257	299	214	167	172	259	321	143	267	155	3.4905968057803	1.59298113931933	1.3279166961896	1.7488783848364	1.58027072265467	1.07282763719056	0.941606643539195	1.37986933001731	1.54834516499263	0.661005523517761	1.30697398460448
ENSMUSG00000033855	399.697390137942	432.809594903188	449.103740903693	578.850698758098	362.092656634782	532.283496926119	343.282951410511	304.104205227053	373.7797765062	350.694373482707	426.691622816561	374.059469415075	459.139596377304	362.102066476351	0.343020188283081	0.0115474290021072	0.293621894548951	Ston1	17	88905112	88970014	+	4521	protein_coding	stonin 1 [Source:MGI Symbol;Acc:MGI:1924307]	-	386	393	488	550	266	461	342	317	432	418	479	430	3.44162796859673	3.8441507385577	3.9481617377919	5.03719213528343	3.07564893895864	4.63715713222893	2.93159909174238	2.64444698736658	3.26275077862918	3.02539955144922	3.67137376631087
ENSMUSG00000060733	572.62346307327	495.583505614337	591.749396313677	608.319461603965	603.034010861686	549.602916565798	512.916924475939	471.985075620536	491.451187628523	441.304402994985	534.478024404878	474.968535582862	570.152125672122	487.850691784621	0.225221459146682	0.0115771971728782	0.293925235466123	Ipmk	10	71183593	71269157	+	7093	protein_coding	inositol polyphosphate multikinase [Source:MGI Symbol;Acc:MGI:1916968]	-	553	450	643	578	443	476	511	492	568	526	600	546	3.14272439128568	2.80559461737128	3.31581760828797	3.37410204222095	3.26485125221053	3.05184439882776	2.79192610675177	2.61604525735512	2.73434328885275	2.42659192320672	2.93122316733069
ENSMUSG00000063684	1437.25382774991	1822.64600398162	1575.54427136705	1610.25739836344	2703.44366946119	1206.5862348976	1601.98710658239	1360.31470981691	1348.89507308603	1099.90508046849	1077.86401588317	1069.98406367568	1725.95523430347	1259.82500825211	0.45387045586373	0.0116246736918174	0.294223883901804	Hadhb-ps	2	108779151	108780578	+	1428	processed_pseudogene	hydroxyacyl-CoA dehydrogenase trifunctional multienzyme complex subunit beta, pseudogene [Source:MGI Symbol;Acc:MGI:3651143]	-	1388	1655	1712	1530	1986	1045	1596	1418	1559	1311	1210	1230	39.1807173768955	51.2521580108606	43.8515726723519	44.3632707343176	72.7010477404688	33.2792459267901	43.3129395221154	37.4505442496973	37.2779970776509	30.0410734872368	29.3619406749657
ENSMUSG00000118140	1.03548546667861	5.50648339571485	10.1232400613537	1.05245581592382	2.72250117770513	5.77313987989284	0	0.959319259391334	0	0.838981754743317	1.78159341468293	0	4.36888429954483	0.596649071469596	2.87609020770049	0.0117051110083301	1	Gm4949	18	38492494	38493591	-	1098	processed_pseudogene	predicted gene 4949 [Source:MGI Symbol;Acc:MGI:3646890]	-	1	5	11	1	2	5	0	1	0	1	2	0	0.0367120625490194	0.201377075703446	0.366437545503988	0.0377101269144169	0.0952176127000015	0.207087105670406	0	0.0343484995083815	0	0.0298015342643473	0.0631182936426126
ENSMUSG00000056492	8552.07446929862	8210.16674301085	8736.35617294827	8966.92355167091	7900.69841770029	8122.80781100922	7201.91572038134	6067.69431565018	6987.60526635202	7577.68320884164	7116.57489495095	8483.32080403676	8414.83786093969	7239.13236836882	0.217143637229057	0.0117227391331569	0.295259627569245	Adgrf5	17	43671342	43770448	+	9010	protein_coding	adhesion G protein-coupled receptor F5 [Source:MGI Symbol;Acc:MGI:2182928]	-	8259	7455	9493	8520	5804	7035	7175	6325	8076	9032	7989	9752	36.949945305483	36.590237005713	38.5379235009318	39.1539099755043	33.6738091272846	35.5078768402588	30.8610070577138	26.4756023097429	30.6059723450266	32.8019831640613	30.7252357717033
ENSMUSG00000040084	389.342535471156	107.927074556011	150.928306369274	232.592735319163	145.653813007224	142.019241045364	77.2888516333607	133.345377055395	150.550187759442	70.4744673984387	161.234204028805	86.1206685397497	194.743950961365	113.168959402532	0.784003634840327	0.0117731125394789	0.295259627569245	Bub1b	2	118428692	118472072	+	4275	protein_coding	BUB1B, mitotic checkpoint serine/threonine kinase [Source:MGI Symbol;Acc:MGI:1333889]	-	376	98	164	221	107	123	77	139	174	84	181	99	3.54538049104973	1.01375339667806	1.40319280582656	2.14050619340318	1.30839022756402	1.30844172955373	0.698019548592786	1.22627758876449	1.38978554852272	0.642960259244277	1.46713490549071
ENSMUSG00000063902	939.185318277497	941.60866066724	860.475405215067	914.584104037795	785.44158976793	864.816354007947	781.922278212831	747.309703065849	882.535583417418	703.0667104749	725.108519775951	711.582897631468	884.351905328913	758.587615429736	0.222131240698588	0.0118585057222263	0.29649863245087	Gm7964	7	83405112	83406489	+	1378	processed_pseudogene	predicted gene 7964 [Source:MGI Symbol;Acc:MGI:3646150]	-	907	855	935	869	577	749	779	779	1020	838	814	818	26.5319514685724	27.4384303192508	24.8182990724871	26.111444206759	21.8885114860795	24.7182655845506	21.9079236915199	21.3205473632062	25.2746771279937	19.8992067586708	20.4692901108654
ENSMUSG00000038173	73.5194681341811	74.888174181722	66.2612076743153	67.3571722191242	72.1462812091859	51.9582589190355	50.1875659956888	64.2743903792194	43.2615482067362	41.1101059824226	51.6662090258049	28.7068895132499	67.6884270562607	46.5344515171869	0.544270790027103	0.0119542972432561	0.297219713374665	Enpp6	8	47439922	47549797	+	6412	protein_coding	ectonucleotide pyrophosphatase/phosphodiesterase 6 [Source:MGI Symbol;Acc:MGI:2445171]	-	71	68	72	64	53	45	50	67	50	49	58	33	0.446350432345049	0.468983717414912	0.41072260246928	0.413282289227995	0.432087784892692	0.319157014696656	0.302196527840874	0.394086356025202	0.266263203509163	0.250059598641674	0.313445524979424
ENSMUSG00000045092	3020.5111063015	3151.91109570718	4066.7816210111	2948.98119621853	2640.82614237398	3058.60950836722	2027.57766622583	2150.79377955537	2705.57722484928	2477.51312175702	1860.87432163632	3317.82050313743	3147.93677832992	2423.35943619354	0.377494688812557	0.0119626359024205	0.297219713374665	S1pr1	3	115504082	115508721	-	3046	protein_coding	sphingosine-1-phosphate receptor 1 [Source:MGI Symbol;Acc:MGI:1096355]	-	2917	2862	4419	2802	1940	2649	2020	2242	3127	2953	2089	3814	38.6026976126486	41.5510589197808	53.0644568111135	38.088911892445	33.2936541635796	39.549177263766	25.7000785013899	27.759767175238	35.0536014421317	31.7230190050933	23.7649078677808
ENSMUSG00000028933	280.616561469903	277.526763144029	286.211605371001	267.323777244649	292.668876603301	218.224687459949	257.96408921784	166.921551134092	252.647441527339	218.135256233263	177.268544760951	193.988980650143	270.428711882139	211.154310587271	0.357228418700479	0.0120322512070058	0.297652961540146	Xrcc2	5	25894810	25910823	-	5216	protein_coding	X-ray repair complementing defective repair in Chinese hamster cells 2 [Source:MGI Symbol;Acc:MGI:1927345]	-	271	252	311	254	215	189	257	174	292	260	199	223	2.09431900075942	2.13651193783898	2.18088329900326	2.01630611875298	2.15471835027697	1.6478194149898	1.90945100875971	1.2581191579899	1.9115247737079	1.63108550647735	1.32203541003625
ENSMUSG00000104872	10.3548546667861	11.0129667914297	12.8841237144502	11.577013975162	16.3350070662308	9.23702380782854	5.01875659956888	5.755915556348	1.73046192826945	4.19490877371659	2.67239012202439	10.4388689139091	11.9001650036479	4.96855031563939	1.25703165036541	0.0120808365223967	1	1700008B11Rik	5	121973258	121973891	+	634	lncRNA	RIKEN cDNA 1700008B11 gene [Source:MGI Symbol;Acc:MGI:1913571]	-	10	10	14	11	12	8	5	6	2	5	3	12	0.635801966542955	0.697514287452314	0.807696866860812	0.718395761628277	0.989422133229668	0.573833796911309	0.305628412699635	0.356921001200659	0.107714805104148	0.258060604276446	0.163968185535304
ENSMUSG00000014444	3843.72205231099	3257.63557690491	2685.41949991184	3891.98160728627	3747.52287111111	3964.9924695104	3108.61783777296	2100.90917806702	2150.96417683892	3323.20673053828	3215.77611350268	2710.62629464505	3565.21234617259	2768.35005522749	0.364821432197692	0.0120901289105355	0.29795552587144	Piezo1	8	123208437	123278068	-	9935	protein_coding	piezo-type mechanosensitive ion channel component 1 [Source:MGI Symbol;Acc:MGI:3603204]	-	3712	2958	2918	3698	2753	3434	3097	2190	2486	3961	3610	3116	15.0609102614788	13.1665703501562	10.7430361352714	15.4120131015406	14.4853159720125	15.7187430038782	12.0805390453731	8.31354694391992	8.54413132762813	13.0460168282582	12.5911942614351
ENSMUSG00000038280	1174.24051921354	1069.35907544782	1050.97637727872	1132.44245793403	970.571669851879	1225.06028251326	1013.78883311291	821.177286038981	951.754060548196	1034.46450359851	961.169647221439	853.377533712066	1103.77506370654	939.288644038684	0.233114522824997	0.0120976055597495	0.29795552587144	Ostm1	10	42459818	42578455	+	7211	protein_coding	osteopetrosis associated transmembrane protein 1 [Source:MGI Symbol;Acc:MGI:2655574]	-	1134	971	1142	1076	713	1061	1010	856	1100	1233	1079	981	6.33911577670027	5.95478519699998	5.79268921607366	6.17841547951519	5.16872786887401	6.69121958645677	5.42798773507376	4.47701324447839	5.20873007069984	5.59510890850623	5.18505709657025
ENSMUSG00000046186	286.829474269974	200.435995604021	211.667746737396	231.540279503239	172.878824784276	152.410892829171	96.3601267117224	126.630142239656	192.081274037909	141.787916551621	130.947115979195	193.988980650143	209.29386895468	146.965926028374	0.510151198547836	0.0122624017540664	0.300762558015365	Cd109	9	78522828	78623535	+	6900	protein_coding	CD109 antigen [Source:MGI Symbol;Acc:MGI:2445221]	-	277	182	230	220	127	132	96	132	222	169	147	223	1.61823579362813	1.1664460666746	1.21923765140418	1.32018235615167	0.962153276852493	0.869981934708581	0.539181672769583	0.721497699238665	1.0985973470144	0.801453956689974	0.73823705099127
ENSMUSG00000017754	6595.00693727605	6956.89112214615	6484.39540657258	7033.56221781886	4776.62831628365	6703.77002853156	4361.29948502535	4512.63779617683	5232.91687108681	6698.43032987065	4259.78985450688	5476.05665108813	6425.04233810481	5090.18849795911	0.336013496645302	0.0122663372571661	0.300762558015365	Pltp	2	164681438	164699631	-	2562	protein_coding	phospholipid transfer protein [Source:MGI Symbol;Acc:MGI:103151]	-	6369	6317	7046	6683	3509	5806	4345	4704	6048	7984	4782	6295	100.208197017731	109.037056047314	100.594244634588	108.007190643878	71.5968434923511	103.05837733049	65.7239467069529	69.2465750088972	80.6059905474454	101.972335528521	64.6782171854943
ENSMUSG00000058620	15.5322820001791	13.2155601497157	47.8553166536722	13.6819256070096	16.3350070662308	26.556443447507	19.0712750783617	6.71523481573934	12.1132334978861	5.0338905284599	2.67239012202439	10.4388689139091	22.1960891540524	9.34081549273009	1.26322222951743	0.012370841047172	0.302424848567141	Adra2b	2	127205128	127209141	+	4014	protein_coding	adrenergic receptor, alpha 2b [Source:MGI Symbol;Acc:MGI:87935]	-	15	12	52	13	12	23	19	7	14	6	3	12	0.150634696109205	0.132204501717419	0.473844229245271	0.134099240552164	0.15627644057489	0.260576869287516	0.18343796010861	0.0657704452469906	0.11909275163234	0.0489119351603189	0.0258983133107581
ENSMUSG00000064672	9.31936920010747	1.10129667914297	3.68117820412863	5.26227907961908	2.72250117770513	3.4638839279357	0	0	1.73046192826945	0	1.78159341468293	0	4.25841804477316	0.585342557158729	2.84654247403544	0.0123731780623529	1	Gm22806	13	51802235	51802370	+	136	snoRNA	predicted gene, 22806 [Source:MGI Symbol;Acc:MGI:5452583]	-	9	1	4	5	2	3	0	0	2	0	2	0	2.66756325080449	0.325164748709387	1.07579792770957	1.52226909382462	0.768742196651483	1.00315430305635	0	0	0.502141076735516	0	0.509587400144034
ENSMUSG00000068101	100.442090267825	49.5583505614337	41.4132547964471	34.7310419254859	55.8112741429552	42.721235111207	13.0487671588791	34.535493338088	25.091697959907	23.4914891328129	56.1201925625122	9.56896317108331	54.112874467559	26.9761005538804	1.003665077122	0.0124585436339983	0.304117664381319	Cenpm	15	82117980	82128949	-	1617	protein_coding	centromere protein M [Source:MGI Symbol;Acc:MGI:1913820]	-	97	45	45	33	41	37	13	36	29	28	63	11	2.41809210503764	1.23067919734165	1.01791640655265	0.845014680653669	1.32545036751041	1.04058389053382	0.311563311993864	0.839658310802291	0.612382314979862	0.566616183935123	1.3500757094725
ENSMUSG00000027715	555.020210139734	137.662084892871	170.254491940949	173.65520962743	292.668876603301	77.360074390564	100.375131991378	165.962231874701	154.876342580115	101.516792323941	148.763050126024	69.5924594260604	234.436824599142	123.51433472037	0.924655910767402	0.0125133633238725	0.305003975573146	Ccna2	3	36619014	36626299	-	4083	protein_coding	cyclin A2 [Source:MGI Symbol;Acc:MGI:108069]	-	536	125	185	165	215	67	100	173	179	121	167	80	5.29171607833684	1.35385763606652	1.65730319992486	1.67326566080943	2.75263554127962	0.746243939052124	0.949147262559729	1.59800021445386	1.49695351114982	0.969721341977139	1.41730945776038
ENSMUSG00000081534	7690.55056102202	7311.50865283018	7261.12400764372	6899.90032919653	5018.93092109941	6654.12102556448	5603.94361907861	5376.98444888842	6529.03285536062	5898.04173584552	5141.67859477493	5067.20095196002	6806.02258289272	5602.81370098469	0.280817661648191	0.0125801912652145	0.305503001725735	Slc48a1	15	97676401	97690573	+	2751	protein_coding	solute carrier family 48 (heme transporter), member 1 [Source:MGI Symbol;Acc:MGI:1914989]	-	7427	6639	7890	6556	3687	5763	5583	5605	7546	7030	5772	5825	108.826323674889	106.722120054053	104.904962590828	98.6753529886977	70.0603302710553	95.267204870698	78.648422640255	76.8413766046664	93.6614490814765	83.6191402742425	72.7048404968857
ENSMUSG00000031004	1573.93790935148	450.430341769475	465.669042822272	732.509247882976	691.515299137103	256.327410667242	290.084131455081	381.809065237751	421.36747953361	222.330165006979	513.098903428683	228.785210363174	695.064875271758	342.912492504213	1.01942250583471	0.0125814723678057	0.305503001725735	Mki67	7	135291513	135318090	-	10061	protein_coding	antigen identified by monoclonal antibody Ki 67 [Source:MGI Symbol;Acc:MGI:106035]	-	1520	409	506	696	508	222	289	398	487	265	576	263	6.08994771014924	1.79773024373432	1.83958130884757	2.86436543773111	2.63944244519718	1.00345342470521	1.11319096601339	1.49194231976551	1.65280825933539	0.861877787983018	1.98385044119287
ENSMUSG00000012443	598.510599740235	134.358194855442	146.326833614113	188.389591050363	191.936333028212	88.9063541503497	92.3451214320673	158.28767779957	155.74157354425	69.6354856436953	145.199863296659	69.5924594260604	224.737984406452	115.13369685705	0.96569538319889	0.012589460349079	0.305503001725735	Kif11	19	37364851	37410307	+	7461	protein_coding	kinesin family member 11 [Source:MGI Symbol;Acc:MGI:1098231]	-	578	122	159	179	141	77	92	165	180	83	163	80	3.12278383921189	0.723111313575413	0.779488486422454	0.99338208872984	0.98789708906238	0.46933082525158	0.477863397827217	0.8340594633338	0.823777882219905	0.364017293076937	0.757038834364893
ENSMUSG00000110386	390.378020937835	110.129667914297	107.674462470762	112.612772303848	212.355091861	115.462797597857	42.1575554363786	150.613123724439	63.1618603818348	39.4321424729359	148.763050126024	84.3808570540982	174.768802180933	88.0847648659519	0.988536732900199	0.0126094899915543	0.305539068515942	Gm42031	8	85852501	85858918	-	1885	lncRNA	predicted gene, 42031 [Source:MGI Symbol;Acc:MGI:5624916]	-	377	100	117	107	156	100	42	157	73	47	167	97	8.06196893576467	2.34601622411017	2.27030459226985	2.35035117807278	4.32616298253524	2.41253731592686	0.863477280993728	3.14122039058454	1.32234923337671	0.815882216045575	3.06995995545658
ENSMUSG00000029843	502.210451339125	479.064055427192	434.379028087178	487.287042772726	310.365134258385	414.511443376306	289.080380135167	300.266928189487	366.857928793123	411.101059824226	372.353023668732	201.818132335575	437.969525876819	323.579575491052	0.437399343887729	0.0126463561650426	0.305982394319247	Slc13a4	6	35244892	35285066	-	4528	protein_coding	solute carrier family 13 (sodium/sulfate symporters), member 4 [Source:MGI Symbol;Acc:MGI:2442367]	-	485	435	472	463	228	359	288	313	424	490	418	232	4.31764016546584	4.24839808605286	3.81281032329575	4.23384453621683	2.63219501256285	3.60556579007828	2.46489854821784	2.60704200972692	3.19737887023816	3.54103830938696	3.19887638288295
ENSMUSG00000024286	2936.63678350053	2737.82354434943	3070.10262224328	2991.07942885548	2974.33253664285	2883.10605601848	2816.52620367805	2663.07026407034	2632.03259289783	2661.2501260458	2330.32418640527	2590.5793021351	2932.18016193501	2615.63044587207	0.165035494627074	0.0126771115551717	0.306066569007822	Ccny	18	9312304	9450154	-	6095	protein_coding	cyclin Y [Source:MGI Symbol;Acc:MGI:1915224]	-	2836	2486	3336	2842	2185	2497	2806	2776	3042	3172	2616	2978	18.7561475814837	18.0372273797619	20.0199022399557	19.3068177848185	18.7399041145984	18.6307452055517	17.8413180871633	17.1773380196101	17.0419843427731	17.0294425630497	14.8727618436131
ENSMUSG00000029101	748.655992408633	504.393879047481	519.966421333169	653.575061688689	412.458928422327	563.458452277541	339.267946130856	480.618948955058	413.580400856398	507.583961619707	484.593408793756	374.059469415075	567.084789196307	433.284022628475	0.388920093965386	0.0126935560180076	0.306066569007822	Rgs12	5	35106789	35196988	+	8487	protein_coding	regulator of G-protein signaling 12 [Source:MGI Symbol;Acc:MGI:1918979]	-	723	458	565	621	303	488	338	501	478	605	544	430	3.43395990371029	2.38645715418998	2.43502747629325	3.02968678185584	1.86628540353566	2.6148754874217	1.54338927334112	2.22635099358568	1.92312873314613	2.33261001490082	2.22112137458797
ENSMUSG00000039840	987.853135211392	883.239936672663	741.757408131919	1058.77055081936	1076.74921578238	808.239583184997	790.956040092055	611.086368232279	655.84507081412	825.558046667424	885.451927097415	631.551569291498	926.101638300451	733.408170365799	0.335915113309898	0.012705561279441	0.306066569007822	Epg5	18	77981680	78078228	+	10039	protein_coding	ectopic P-granules autophagy protein 5 homolog (C. elegans) [Source:MGI Symbol;Acc:MGI:1918673]	-	954	802	806	1006	791	700	788	637	758	984	994	726	3.83061976527517	3.53285879781157	2.93666365284919	4.14923335672298	4.11884702395557	3.17097618125858	3.04192668507692	2.39309030950785	2.57818105979235	3.20734448334469	3.43102216859603
ENSMUSG00000029716	1063.44357427893	316.072146914033	437.139911740275	500.968968379736	374.343911934455	332.532857081827	109.408893870601	285.877139298617	209.385893320603	519.329706186114	133.61950610122	167.021902622545	504.083561721543	237.44050689995	1.08596353383693	0.0127465824969471	0.306241857231815	Tfr2	5	137568102	137585743	+	4336	protein_coding	transferrin receptor 2 [Source:MGI Symbol;Acc:MGI:1354956]	-	1027	287	475	476	275	288	109	298	242	619	150	192	9.54755776871577	2.92708267334521	4.00695030731308	4.54546181078556	3.31537801600155	3.02056793835418	0.974204662731596	2.59201255376856	1.90572729676191	4.67134925765102	1.1987526479403
ENSMUSG00000028873	302.361756270153	112.332261272583	125.160058940373	162.078195652268	119.790051819026	80.8239583184997	72.2700950337918	109.362395570612	121.132334978861	60.4066863415189	112.240385125024	56.5438732836741	150.424380378817	88.6592950555804	0.764279775982075	0.0127500099569719	0.306241857231815	Cdca8	4	124812258	124833104	-	5177	protein_coding	cell division cycle associated 8 [Source:MGI Symbol;Acc:MGI:1196274]	-	292	102	136	154	88	70	72	114	140	72	126	65	2.27360916480904	0.871293296136106	0.960882676787531	1.23169418199973	0.888575102330012	0.614901098776413	0.538973373881126	0.830494568372249	0.923388651829652	0.455087906664524	0.843373545380352
ENSMUSG00000032411	819.069004142778	749.983038496363	758.322710050498	914.584104037795	965.126667496468	759.745208193897	747.794733335763	691.669186021152	659.305994670659	719.007363815023	701.057008677732	720.281955059725	827.805122069633	706.519373596676	0.227543548543208	0.012786667714841	0.306675289574142	Tfdp2	9	96078328	96205699	+	14029	protein_coding	transcription factor Dp 2 [Source:MGI Symbol;Acc:MGI:107167]	E2F	791	681	824	869	709	658	745	721	762	857	787	828	2.27279828504877	2.14665752131076	2.14837513313217	2.56479935254928	2.6418560684982	2.13296914182305	2.05798657310455	1.93828957329862	1.85465407599455	1.99891842050546	1.94390757046889
ENSMUSG00000034387	26.9226221336438	28.6337136577172	22.0870692247718	34.7310419254859	28.5862623659039	12.7009077357642	6.02250791948265	12.4711503720873	16.4393883185597	17.6186168496097	18.7067308541707	3.47962297130302	25.6102695072145	12.4563362142022	1.0343318450644	0.0128192961576139	0.30701096335611	Ssu2	6	112336285	112364984	-	2543	protein_coding	ssu-2 homolog (C. elegans) [Source:MGI Symbol;Acc:MGI:2443733]	-	26	26	24	33	21	11	6	13	19	21	21	4	0.412133685273066	0.452136276616749	0.345202952815969	0.53731369981006	0.431680635791709	0.196712391843269	0.0914361369964147	0.192800032238552	0.255118470759845	0.270217765264381	0.286154466144585
ENSMUSG00000023033	239.197142802758	143.168568288586	166.573313736821	192.599414314058	42.1987682544295	100.452633910135	50.1875659956888	46.047324450784	68.3532461666431	153.533661118027	77.4993135387073	80.0313283399695	147.364973551131	79.2754066016366	0.895069923216947	0.0128668567545756	0.307256809775568	Scn8a	15	100767739	100943819	+	15766	protein_coding	sodium channel, voltage-gated, type VIII, alpha [Source:MGI Symbol;Acc:MGI:103169]	-	231	130	181	183	31	87	50	48	79	183	87	92	0.590611069441088	0.364639905948368	0.419920109547424	0.480606789383575	0.102785015256966	0.250947645011687	0.122902710675865	0.114823247373445	0.171096147673677	0.37981361701588	0.191216482256254
ENSMUSG00000030751	2370.22623322733	2501.04475833369	2233.55487535505	2423.80574407255	2364.49227283691	2130.28861568046	2151.03907857522	2026.0822758345	2303.24482652663	2024.46297419563	1802.08173895178	1790.2660187354	2337.23541658433	2016.19615213653	0.213203266221548	0.012885582320991	0.307258668455816	Psma1	7	113863841	113875353	-	2952	protein_coding	proteasome subunit alpha 1 [Source:MGI Symbol;Acc:MGI:1347005]	-	2289	2271	2427	2303	1737	1845	2143	2112	2662	2413	2023	2058	31.2565157418112	34.0206922857001	30.0720506093287	32.3026326787685	30.7590627708965	28.4227052532633	28.1331782151295	26.9828407845354	30.7911819601477	26.7474221522688	23.7469109462784
ENSMUSG00000011752	2600.10400682998	3178.34221600661	3186.98003022436	2848.99789370577	3099.56759081729	2693.747067958	2380.89813083547	2794.49700260695	2936.59389227325	2231.69146761722	1925.0116845649	2092.12331149594	2934.623134257	2393.46924823229	0.294113489974249	0.0129394867806502	0.30743618444093	Pgam1	19	41900362	41907099	+	1982	protein_coding	phosphoglycerate mutase 1 [Source:MGI Symbol;Acc:MGI:97552]	-	2511	2886	3463	2707	2277	2333	2372	2913	3394	2660	2161	2405	51.0686276430502	64.3924637787284	63.9084760869728	56.5516055933121	60.0549781840207	53.5299062408583	46.3792812493967	55.4302636814183	58.4713135125848	43.9156130651836	37.7814577580048
ENSMUSG00000037544	184.316413068792	56.1661306362915	65.3409131232832	105.245581592382	80.3137847423013	30.0203273754427	26.0975343177582	51.803240007132	72.6794009873168	8.38981754743318	55.2293958551707	16.5282091136893	86.9005250897487	38.4545996380834	1.17735327660103	0.0129515604313097	0.30743618444093	Dlgap5	14	47625236	47655864	-	6805	protein_coding	DLG associated protein 5 [Source:MGI Symbol;Acc:MGI:2183453]	-	178	51	71	100	59	26	26	54	84	10	62	19	1.05439417381786	0.331424349309083	0.38162765576648	0.608460240294339	0.45322464261069	0.17375232013751	0.148066972959318	0.299278652880376	0.421488586379613	0.0480853558005193	0.315712046878361
ENSMUSG00000078865	11.3903401334647	11.0129667914297	1.84058910206432	27.3638512140192	8.16750353311539	6.9277678558714	1.00375131991378	1.91863851878267	9.51754060548196	3.35592701897327	0.890796707341463	1.73981148565151	11.1171697716608	3.07107760935744	1.84317149588363	0.012999444767384	1	Gm14406	2	177260997	177270003	-	1621	protein_coding	predicted gene 14406 [Source:MGI Symbol;Acc:MGI:3649838]	zf-C2H2	11	10	2	26	6	6	1	2	11	4	1	2	0.273539970059875	0.272809412859202	0.0451290925874464	0.664126282018985	0.193489707732144	0.168326940426482	0.0239072688034014	0.0465325755215335	0.231709762737918	0.0807454278155543	0.0213768927882753
ENSMUSG00000019942	540.523413606233	170.700985267161	148.167422716177	238.907470214706	239.580103638051	111.998913669921	71.266343713878	138.141973352352	206.790200428199	110.745591626118	180.831731590317	91.3401029967043	241.646384852042	133.185990617928	0.859190032793439	0.0130303296103257	0.307708047578515	Cdk1	10	69170976	69188768	-	4934	protein_coding	cyclin-dependent kinase 1 [Source:MGI Symbol;Acc:MGI:88351]	-	522	155	161	227	176	97	71	144	239	132	203	105	4.26464104628005	1.38923244888405	1.19353827650632	1.90496519921175	1.86467503233177	0.894042127139534	0.557663452341361	1.10071138108416	1.65399205089291	0.875418559006373	1.42568797559551
ENSMUSG00000022255	2283.24545402633	2255.4555988848	2169.1342567828	2607.98551185921	2775.58995067038	1976.72309487531	2429.07819419134	1820.78795432475	1910.42996880947	1735.01426880918	1917.88531090617	1732.8522397089	2344.68897784981	1924.34132279164	0.284986165442061	0.0132024119464072	0.310584988343689	Mtdh	15	34082840	34145770	+	15347	protein_coding	metadherin [Source:MGI Symbol;Acc:MGI:1914404]	-	2205	2048	2357	2478	2039	1712	2420	1898	2208	2068	2153	1992	5.79156887449049	5.90131537945711	5.61753400213654	6.68556542349188	6.9451777578759	5.0730093327516	6.11089543281158	4.66426079165082	4.91258681340831	4.40928331262266	4.86125195352102
ENSMUSG00000023913	289.93593067001	278.628059823172	264.124536146229	241.012381846554	608.479013217097	390.264255880756	251.941581298358	276.283946704704	260.434520204552	211.423402195316	168.360577687537	246.183325219689	345.407362930636	235.771225551692	0.548523924545082	0.0132135750943088	0.310584988343689	Pla2g7	17	43878989	43923092	+	2905	protein_coding	phospholipase A2, group VII (platelet-activating factor acetylhydrolase, plasma) [Source:MGI Symbol;Acc:MGI:1351327]	-	280	253	287	229	447	338	251	288	301	252	189	283	3.88528623410345	3.85138336440365	3.61364412343889	3.26399646527188	8.04361026141772	5.2912216870791	3.34842491060542	3.73900857436779	3.53797712861361	2.83854228048463	2.25446377509505
ENSMUSG00000026220	9.31936920010747	16.5194501871446	14.7247128165145	11.577013975162	16.3350070662308	27.7110714234856	8.0300105593102	0	15.574157354425	2.51694526422995	3.56318682936585	4.34952871412878	16.0311041114408	5.67230478690997	1.49330661641105	0.0133950798020884	0.31100290941633	Slc16a14	1	84883619	84912855	-	3352	protein_coding	solute carrier family 16 (monocarboxylic acid transporters), member 14 [Source:MGI Symbol;Acc:MGI:1919031]	-	9	15	16	11	12	24	8	0	18	3	4	5	0.108230489889442	0.197892627496167	0.174592503781028	0.135877957300814	0.187140105151435	0.325606169965785	0.0924908895711545	0	0.183359390788864	0.02928587525858	0.0413507675534538
ENSMUSG00000029641	110.796944934611	53.9635372780056	99.391811511473	106.298037408305	76.2300329757436	109.689657717964	54.2025712753439	44.1286859320013	72.6794009873168	92.2879930217649	32.9594781716341	56.5438732836741	92.7283369710171	58.8003337786225	0.65656315631448	0.013402763827751	0.31100290941633	Rasl11a	5	146781881	146784536	+	1201	protein_coding	RAS-like, family 11, member A [Source:MGI Symbol;Acc:MGI:1916145]	-	107	49	108	101	56	95	54	46	84	110	37	65	3.59130173241807	1.80424470058231	3.28920065824274	3.48207964575771	2.43744403401236	3.59721165570027	1.74246366980595	1.44452457382959	2.38820135746317	2.99702690128882	1.06754529455653
ENSMUSG00000001542	1137.99852787979	1642.03334860217	1314.18061887392	1451.33657015894	1158.42425111353	1286.25556524012	1178.40404957877	1017.8377342142	1290.05936752487	1073.0576643167	1032.43338380876	959.506034336808	1331.70481364475	1091.88303896335	0.286748691810032	0.0134157796951453	0.31100290941633	Ell2	13	75854876	75920483	+	9828	protein_coding	elongation factor for RNA polymerase II 2 [Source:MGI Symbol;Acc:MGI:2183438]	-	1099	1491	1428	1379	851	1114	1174	1061	1491	1279	1159	1103	4.50758234656358	6.70895472978172	5.31462565996693	5.80977686064805	4.52641162350712	5.15472424129187	4.62930642301469	4.07155537853839	5.18020751811767	4.25839908749105	4.08644710827753
ENSMUSG00000032400	215.38097706915	93.6102177271525	85.5873932459907	163.130651468191	98.0100423973847	95.8341220062211	89.333867472326	95.9319259391334	74.4098629155862	96.4829017954815	67.7005497579512	66.1128364547574	125.258900652348	81.6619907225393	0.619335594325574	0.0134612682253061	0.311518703017372	Zwilch	9	64044426	64080386	-	4283	protein_coding	zwilch kinetochore protein [Source:MGI Symbol;Acc:MGI:1915264]	-	208	85	93	155	72	83	89	100	86	115	76	76	1.95761094867972	0.877633550100518	0.794226721320957	1.49845587195065	0.878767638292239	0.881283039372721	0.805294831426085	0.880566249362665	0.685622464802544	0.878599050095526	0.614883886048183
ENSMUSG00000035681	362.419913337513	332.591597101177	218.109808594621	396.775842603278	231.412600104936	197.441383892335	199.746512662841	204.335002250354	162.663421257328	289.448705386445	177.268544760951	192.249169164492	289.791857605643	204.285225913735	0.504886561520862	0.0137541380829407	0.3160766153314	Kcnc2	10	112107026	112302929	+	7138	protein_coding	potassium voltage gated channel, Shaw-related subfamily, member 2 [Source:MGI Symbol;Acc:MGI:96668]	-	350	302	237	377	170	171	199	213	188	345	199	221	1.97652642723286	1.87099559526365	1.21445498759929	2.18688094644371	1.24497895675135	1.08944412402533	1.08041228121777	1.12541621939244	0.899323553514547	1.58155214271188	0.966060058664761
ENSMUSG00000059447	4718.70727165441	6103.38619581035	4978.79352108397	5573.80600113253	9731.58045970699	4561.93513309132	5163.29678963646	4678.60002805153	4738.00475960174	4088.35809086419	4069.15935913581	3729.28591949401	5944.70143041326	4411.11749113062	0.430312239319471	0.0137897296238739	0.316453168541184	Hadhb	5	30360246	30389591	+	6595	protein_coding	hydroxyacyl-CoA dehydrogenase trifunctional multienzyme complex subunit beta [Source:MGI Symbol;Acc:MGI:2136381]	-	4557	5542	5410	5296	7149	3951	5144	4877	5476	4873	4568	4287	27.8532164065804	37.1615728702426	30.00489322561	33.2501424849658	56.6656833271537	27.2444235828702	30.2272849074653	27.889971197636	28.3519739896665	24.1781225722882	24.0015279124095
ENSMUSG00000111250	1.03548546667861	1.10129667914297	1.84058910206432	5.26227907961908	2.72250117770513	1.15462797597857	0	0	0	0	0	0	2.18612991353144	0	3.7171315368715	0.0138249552886505	1	Gm47818	9	77743312	77755393	+	2740	lncRNA	predicted gene, 47818 [Source:MGI Symbol;Acc:MGI:6097006]	-	1	1	2	5	2	1	0	0	0	0	0	0	0.014711622145556	0.016139564169517	0.0266986347022813	0.0755578820292514	0.0381565469870809	0.016597200147891	0	0	0	0	0
ENSMUSG00000041431	375.881224404334	58.3687239945775	93.8700442052801	182.07485615482	98.0100423973847	43.8758630871856	34.1275448770684	107.443757051829	96.0406370189543	32.7202884349894	81.0625003680732	32.1865124845529	142.013459040597	63.9302067059113	1.15261256750243	0.0140580408715793	0.320823184821347	Ccnb1	13	100915158	100923078	-	4217	protein_coding	cyclin B1 [Source:MGI Symbol;Acc:MGI:88302]	-	363	53	102	173	72	38	34	112	111	39	91	37	3.46987754764356	0.555794998505398	0.884720705073935	1.69864582591917	0.892521174959843	0.409793805880581	0.312455587581377	1.00166968829564	0.898781324922853	0.302623025911283	0.74776543326803
ENSMUSG00000097993	52.809758800609	14.3168568288586	5.52176730619295	14.7343814229334	6.80625294426282	30.0203273754427	2.00750263982755	10.5525118533047	4.32615482067362	10.9067628116631	9.7987637807561	7.8291516854318	20.7015574463833	7.57014126527614	1.44981530925045	0.0140790644976116	0.320858569470466	Ptprv	1	135036235	135060332	-	6987	protein_coding	protein tyrosine phosphatase, receptor type, V [Source:MGI Symbol;Acc:MGI:108027]	-	51	13	6	14	5	26	2	11	5	13	11	9	0.294232442911119	0.082280131060283	0.0314101584732721	0.0829655175223153	0.0374083793990989	0.169226354449084	0.0110930822184954	0.0593761524348407	0.0244350888922392	0.060882653512136	0.0545543688718674
ENSMUSG00000022040	3751.56384577659	5597.89102008372	3136.36382991759	6393.66908173718	6101.1251392372	3171.76305001312	3755.03368779743	3337.47170342245	3068.97422978586	3985.16333503076	3232.70125094217	3156.88794071467	4692.06266112757	3422.70535794889	0.454971884459664	0.0141827856201408	0.322313688139583	Ephx2	14	66321823	66361949	-	2484	protein_coding	epoxide hydrolase 2, cytoplasmic [Source:MGI Symbol;Acc:MGI:99500]	-	3623	5083	3408	6075	4482	2747	3741	3479	3547	4750	3629	3629	58.7933040544996	90.4921452519384	50.1831149273604	101.263987545725	94.3213251717602	50.2912536751783	58.3645439187213	52.821769689632	48.7578176909418	62.5724242977873	50.6247592223605
ENSMUSG00000051375	1792.42534282067	1646.43853531874	1974.03181196398	1632.35897049784	1549.10317011422	1437.51183009332	1371.12430300222	1518.60238761648	1424.17016696575	1505.13326800951	1368.26374247649	1433.60466417684	1671.97827680146	1436.81642204122	0.219412737766656	0.014201598445672	0.322313688139583	Pcdh1	18	38318967	38345106	-	8797	protein_coding	protocadherin 1 [Source:MGI Symbol;Acc:MGI:104692]	-	1731	1495	2145	1551	1138	1245	1366	1583	1646	1794	1536	1648	7.93183370911029	7.51534576646501	8.91871579718755	7.30024675628034	6.76234467951328	6.43606102813464	6.01767996016922	6.78666532278063	6.3889560573892	6.67311808711181	6.05040181541935
ENSMUSG00000018507	282.68753240326	312.768256876604	322.103092861255	208.386251552915	314.448886024942	345.233764817592	193.724004743359	219.684110400615	269.086829845899	280.219906084268	150.544643540707	219.21624719209	297.604630756095	222.079290301156	0.420971330692345	0.0142661036403365	0.322888172639869	Trpv2	11	62465312	62491341	+	4485	protein_coding	transient receptor potential cation channel, subfamily V, member 2 [Source:MGI Symbol;Acc:MGI:1341836]	-	273	284	350	198	231	299	193	229	311	334	169	252	2.45364271958055	2.80025936547411	2.85440252837099	1.82794480082539	2.69239741917536	3.03175522701475	1.66766126353413	1.92567567745518	2.36773232793817	2.43682859840192	1.30572539631109
ENSMUSG00000036223	39.3484477337871	5.50648339571485	17.485596469611	26.3113953980954	19.0575082439359	9.23702380782854	5.01875659956888	11.511831112696	9.51754060548196	5.0338905284599	12.4711539027805	0.869905742825755	19.4910758414955	7.40384641530216	1.40119612049085	0.0143293644803091	0.323431422660347	Ska1	18	74328370	74340889	-	2669	protein_coding	spindle and kinetochore associated complex subunit 1 [Source:MGI Symbol;Acc:MGI:1913718]	-	38	5	19	25	14	8	5	12	11	6	14	1	0.57391311269962	0.0828445219641751	0.260384211802316	0.387839259573153	0.27420103829607	0.136309714215725	0.0725996304427009	0.169567564452018	0.140727435518234	0.073560325115594	0.181763658650101
ENSMUSG00000001228	778.685070942313	232.373599299167	218.109808594621	266.271321428725	306.281382491827	130.472961285578	138.517682148101	156.369039280787	285.526218164459	118.296427418808	221.808380128024	155.71312796581	322.032357340372	179.371812517665	0.84433447481246	0.0143618473734742	0.323721147979116	Uhrf1	17	56610321	56630486	+	4259	protein_coding	ubiquitin-like, containing PHD and RING finger domains, 1 [Source:MGI Symbol;Acc:MGI:1338889]	-	752	211	237	253	225	113	138	163	330	141	249	179	7.11739920133251	2.19087288775877	2.03540260659397	2.45964944730301	2.76162376350497	1.20658020891993	1.25569575411676	1.44341121178987	2.64570222163535	1.08330921149043	2.02590604818943
ENSMUSG00000021067	1189.77280121372	1334.77157512128	1597.63134059183	1227.16348136717	1705.64698783226	1706.54014849632	1359.07928716325	1062.9257394056	1265.8329005291	1179.6083471691	1002.14629575915	1216.99813421323	1460.25438910376	1181.09845070657	0.305756026978211	0.0144361253616146	0.32462944815837	Sav1	12	70011786	70033776	-	5265	protein_coding	salvador family WW domain containing 1 [Source:MGI Symbol;Acc:MGI:1927144]	-	1149	1212	1736	1166	1253	1478	1354	1108	1463	1406	1125	1399	8.79696325469478	10.1799726228425	12.0603792754282	9.16981363047801	12.4406287034175	12.7661943747231	9.96628421972361	7.93691071717091	9.48812970141615	8.73831927424278	7.40426136961416
ENSMUSG00000055632	419.371614004836	852.40362965666	965.388984032733	613.581740683584	1565.43817718045	1801.21964252656	712.66343713878	332.883783008793	505.294883054678	463.117928618311	781.228712338463	877.734894511187	1036.2339646808	612.153939778369	0.758962182649657	0.0144897007517845	0.32462944815837	Hmcn2	2	31204427	31350750	+	16073	protein_coding	hemicentin 2 [Source:MGI Symbol;Acc:MGI:2677838]	-	405	774	1049	583	1150	1560	710	347	584	552	877	1009	1.01570877215974	2.12954284253997	2.38719647170345	1.5018686232958	3.74016299248093	4.41380403858304	1.71188419949747	0.814221639002701	1.24065367008777	1.12378465199302	1.8907331671119
ENSMUSG00000071036	9.31936920010747	20.9246369037165	8.28265095928942	4.20982326369526	21.780009421641	16.1647916636999	3.01125395974133	3.83727703756533	11.2480025337514	1.67796350948663	0.890796707341463	6.95924594260604	13.4468802353583	4.60408994841537	1.53059148669242	0.0144917089856097	1	Gm10309	17	86805160	86812660	-	2005	protein_coding	predicted gene 10309 [Source:MGI Symbol;Acc:MGI:3641941]	-	9	19	9	4	16	14	3	4	13	2	1	8	0.180941946189232	0.41906519235165	0.164186616398568	0.0826049263880893	0.417152872796415	0.317540447717256	0.0579855601949832	0.0752412019156168	0.221392873732766	0.0326404834137191	0.0172827646931642
ENSMUSG00000020312	267.155250403081	277.526763144029	288.052194473065	234.697646951011	295.391377781007	272.492202330942	214.802782461548	207.212960028528	210.251124284738	201.355621138396	176.37774805361	291.418423846628	272.552572513856	216.903109968908	0.328566347458819	0.0146566671548596	0.327676939905865	Shc2	10	79453885	79473752	-	5426	protein_coding	SHC (Src homology 2 domain containing) transforming protein 2 [Source:MGI Symbol;Acc:MGI:106180]	-	258	252	313	223	217	236	214	216	243	240	198	335	1.91668631167276	2.05382349203246	2.10995973952916	1.70170943890576	2.0905934120511	1.97796046878589	1.52843496208757	1.5013573408411	1.52918893328007	1.44734616832673	1.26448299954649
ENSMUSG00000027187	14013.2248205616	17686.8246670361	16780.6508435204	17686.5199865997	18745.7818590887	16475.3865892382	13649.0104481875	14706.3642464691	17460.3608562387	14028.613921063	12353.5687374114	12801.5329114238	16898.0647943408	14166.5751867989	0.254327794769137	0.0148089266090484	0.328964899238015	Cat	2	103284194	103315505	-	2613	protein_coding	catalase [Source:MGI Symbol;Acc:MGI:88271]	-	13533	16060	18234	16805	13771	14269	13598	15330	20180	16721	13868	14716	208.768897067936	271.799402044047	255.242013039079	266.292810451918	275.496256305379	248.335908922351	201.673393710986	221.265067820479	263.703815973802	209.393791415499	183.908591057569
ENSMUSG00000032218	308.574669070225	92.5089210480096	77.3047422867012	147.343814229334	129.318805940994	63.5045386788212	40.150052796551	88.2573718640027	101.232022803763	57.8897410772889	107.786401588317	33.0564182273787	136.425915209014	71.3953347262168	0.934280578680181	0.0148524383332085	0.328964899238015	Ccnb2	9	70314974	70328829	-	1531	protein_coding	cyclin B2 [Source:MGI Symbol;Acc:MGI:88311]	-	298	84	84	140	95	55	40	92	117	69	121	38	7.84607035551232	2.42631096620251	2.00684446867311	3.78628393813466	3.24368033335635	1.63370219613793	1.01250640706241	2.26632790747137	2.60942809046882	1.47473797448431	2.73865782389622
ENSMUSG00000027848	717.591428408275	726.855808234361	688.380324172054	463.080559006479	649.316530882673	864.816354007947	357.335469889304	488.293503030189	811.58664435837	458.084038089851	320.686814642927	447.131551812438	685.006834118631	480.519670303847	0.511127946501973	0.0148961718117392	0.328964899238015	Olfml3	3	103629538	103645317	-	6161	protein_coding	olfactomedin-like 3 [Source:MGI Symbol;Acc:MGI:1914877]	-	693	660	748	440	477	749	356	509	938	546	360	514	4.53412146768781	4.73734586011274	4.44078768016714	2.95707133823943	4.04721991407036	5.52861061118499	2.23929736276444	3.11585101480982	5.19859867529592	2.89989582920798	2.02478486536698
ENSMUSG00000058799	7047.5140862146	8990.98608852322	7502.24118001415	7167.22410644118	5868.35128854341	5812.39723107611	5391.14833925689	5319.42529332494	6630.26487816438	6064.1601232847	5971.01032930983	5421.25258929011	7064.78566346878	5799.54359210514	0.284780268292209	0.0149533782268077	0.328964899238015	Nap1l1	10	111309084	111334011	+	4994	protein_coding	nucleosome assembly protein 1-like 1 [Source:MGI Symbol;Acc:MGI:1855693]	-	6806	8164	8152	6810	4311	5034	5371	5545	7663	7228	6703	6232	54.9356833968906	72.29309594534	59.7070004059683	56.4623445709497	45.1251977300739	45.8405761297324	41.679221054168	41.8758005390119	52.3944094572786	47.3598773827888	46.5102073158292
ENSMUSG00000045094	332.390834803833	494.482208935194	394.806362392796	603.057182524346	209.632590683295	400.655907664563	263.986597137323	229.277302994529	360.80131204418	308.745285745541	311.778847569512	205.297755306878	405.837514500671	279.981183466327	0.53637541150936	0.0149658871206363	0.328964899238015	Arhgef37	18	61624728	61669665	-	5870	protein_coding	Rho guanine nucleotide exchange factor (GEF) 37 [Source:MGI Symbol;Acc:MGI:3045339]	-	321	449	429	573	154	347	263	239	417	368	350	236	2.20433733252169	3.38259969594379	2.67318374336827	4.04181894185913	1.37142560193089	2.68829403008719	1.7363234340839	1.53557102861814	2.4256750207687	2.05140155723837	2.06612949291789
ENSMUSG00000066735	2248.03894815926	2559.41348232826	2296.13490482523	2188.05564130561	2182.08469393066	2063.3201930737	2131.96780349686	1875.46915211006	2085.20662356468	1999.29352155333	1894.72459651529	1959.0277328436	2256.17464393712	1990.9482383473	0.180660751005956	0.0150061659159353	0.328964899238015	Vkorc1l1	5	129970811	130015533	+	5262	protein_coding	vitamin K epoxide reductase complex, subunit 1-like 1 [Source:MGI Symbol;Acc:MGI:1916818]	-	2171	2324	2495	2079	1603	1787	2124	1955	2410	2383	2127	2252	16.6310666662344	19.5311423671767	17.3432037642727	16.3592722411383	15.9247385792091	15.4439754580255	15.6428776357253	14.0121903382168	15.6387076502121	14.8188383988654	14.0069713430696
ENSMUSG00000027698	418.336128538157	331.490300422034	330.385743820545	194.704325945906	419.26518136659	295.584761850513	203.761517942496	193.782490397049	312.348378052635	277.702960820038	207.555632810561	242.703702248386	331.627740323958	239.642447045194	0.466913154431675	0.0150083413078797	0.328964899238015	Nceh1	3	27237114	27338757	+	5253	protein_coding	neutral cholesterol ester hydrolase 1 [Source:MGI Symbol;Acc:MGI:2443191]	-	404	301	359	185	308	256	203	202	361	331	233	279	3.1001669998562	2.53396995110746	2.49975052458081	1.45822541026566	3.06501743130947	2.21624596834888	1.49761994941056	1.45028741613573	2.34657512882228	2.06187131352863	1.53700795124349
ENSMUSG00000028238	279.581076003224	270.918983069171	213.508335839461	57.8850698758098	254.55386011543	188.204360084506	36.1350475168959	60.437113341654	243.995131885992	72.1524309079253	21.3791209761951	35.666135455856	210.775280831267	78.2941633474197	1.42788337696669	0.0150284550181456	0.328964899238015	Atp6v0d2	4	19876841	19922605	-	2716	protein_coding	ATPase, H+ transporting, lysosomal V0 subunit D2 [Source:MGI Symbol;Acc:MGI:1924415]	-	270	246	232	55	187	163	36	63	282	86	24	41	4.0072378730789	4.00541672784288	3.12440870904752	0.838481061988821	3.59916265560392	2.72924945878169	0.513671788767045	0.874824412736666	3.5453082796319	1.03611902706693	0.306202738230877
ENSMUSG00000019850	398.661904671264	443.822561694617	523.647599537298	334.680949463773	370.260160167898	501.108541574698	263.986597137323	331.924463749401	380.701624219278	255.050453441969	219.135990006	439.302400127006	428.696952851591	315.01692144683	0.444836741901321	0.0150463970446157	0.328964899238015	Tnfaip3	10	18876658	18891405	-	7226	protein_coding	tumor necrosis factor, alpha-induced protein 3 [Source:MGI Symbol;Acc:MGI:1196377]	-	385	403	569	318	272	434	263	346	440	304	246	505	2.14770138407791	2.46632016984004	2.88020851224319	1.82217253721914	1.96770767634456	2.73134881370966	1.41049246582792	1.8058773527858	2.07916703790847	1.37662797192984	1.17968143227365
ENSMUSG00000039952	5497.39234259673	5198.12032555482	5494.15846966198	5607.48458724209	7100.28307145498	5276.64985022205	5657.14243903404	4549.0919280337	5119.57161478516	3805.62123951569	4514.55771280654	4590.49260489151	5695.68144112211	4706.07958984444	0.275263294854172	0.0150767828175756	0.328964899238015	Dag1	9	108081833	108141157	-	6357	protein_coding	dystroglycan 1 [Source:MGI Symbol;Acc:MGI:101864]	-	5309	4720	5970	5328	5216	4570	5636	4742	5917	4536	5068	5277	33.6644589271469	32.8346319791615	34.3503953699053	34.7034249972652	42.8918723054776	32.6925941185876	34.3583067277093	28.133220381671	31.7822046674524	23.3486512264498	27.6256171444451
ENSMUSG00000085498	23.816165733608	23.1272302620024	14.7247128165145	13.6819256070096	23.1412600104936	11.5462797597857	12.0450158389653	0.959319259391334	11.2480025337514	8.38981754743318	12.4711539027805	5.21943445695453	18.3395956982356	8.38879058987937	1.12386477129888	0.015199206225978	0.330828693507846	Gm14023	2	129139285	129149746	+	2672	lncRNA	predicted gene 14023 [Source:MGI Symbol;Acc:MGI:3650639]	-	23	21	16	13	17	10	12	1	13	10	14	6	0.346978453447955	0.347556333201351	0.219024727797158	0.20144998187739	0.332584573102213	0.1701958398399	0.17404348531578	0.0141147651422915	0.166127511913995	0.122462891550349	0.181559582686048
ENSMUSG00000050199	1489.02810108384	1100.19538246383	1455.90597973287	1514.48391911437	1152.97924875812	1374.00729141449	1168.36653637963	1039.90207718021	1102.30424830764	1355.7945156652	994.129125393073	947.327353937247	1347.76665376125	1101.30397614383	0.291836427845018	0.0156132669665848	0.338054927474925	Lgr4	2	109747992	109844602	+	5884	protein_coding	leucine-rich repeat-containing G protein-coupled receptor 4 [Source:MGI Symbol;Acc:MGI:1891468]	-	1438	999	1582	1439	847	1190	1164	1084	1274	1616	1116	1089	9.85138624203738	7.50818888828216	9.83429961516694	10.1262457762697	7.5248938746327	9.1972859962973	7.66643213767594	6.94811068437457	7.39318248806105	8.98689475689352	6.57232641436615
ENSMUSG00000078780	13.4613110668219	11.0129667914297	12.8841237144502	3.15736744777145	9.52875412196795	15.0101636877214	4.0150052796551	3.83727703756533	10.3827715696167	0.838981754743317	0.890796707341463	0.869905742825755	10.8424478050271	3.47245634862461	1.64630753293709	0.0156643416732731	1	Gm5150	3	16001034	16060601	-	1213	protein_coding	predicted gene 5150 [Source:MGI Symbol;Acc:MGI:3779469]	-	13	10	14	3	7	13	4	4	12	1	1	1	0.432009877019541	0.364570534414482	0.422159780370779	0.102404911835193	0.301666352519461	0.487380271449197	0.127794501996088	0.124368186183686	0.337796470417297	0.0269761620958396	0.0285671419701519
ENSMUSG00000073929	1.03548546667861	6.60778007485783	3.68117820412863	0	12.2512552996731	13.8555357117428	0	0.959319259391334	2.59569289240417	0.838981754743317	0	1.73981148565151	6.23853912618016	1.02230089869839	2.57628159244567	0.0157677413550148	1	Trim30e-ps1	7	104182166	104184568	-	1890	transcribed_unprocessed_pseudogene	tripartite motif-containing 30E, pseudogene 1 [Source:MGI Symbol;Acc:MGI:4821258]	-	1	6	4	0	9	12	0	1	3	1	0	2	0.0213279601475256	0.140388589918974	0.0774119143748684	0	0.248926044630004	0.288738593049024	0	0.0199548425715359	0.0541993543143096	0.0173132722869065	0
ENSMUSG00000042010	1279.86003681476	1646.43853531874	926.736612889383	2421.7008324407	9799.64298914961	1606.08751458619	2189.18162873194	585.184748228713	558.939202831031	1067.1847920335	1121.5130545429	1001.26150999244	2946.7444201999	1087.21082272676	1.43841065092026	0.0160627584167261	0.345968719519472	Acacb	5	114284596	114388822	+	9632	protein_coding	acetyl-Coenzyme A carboxylase beta [Source:MGI Symbol;Acc:MGI:2140940]	-	1236	1495	1007	2301	7199	1391	2181	610	646	1272	1259	1151	5.17265033461645	6.86383894389459	3.82404167866697	9.89146181779698	39.0701728624578	6.56743903775569	8.77510195544168	2.38849024093893	2.29008027604212	4.32127197254011	4.52936010186161
ENSMUSG00000021719	443.187779738444	572.674273154345	490.51699570014	635.683312817984	340.312647213141	476.861354079148	291.087882774995	354.948125974793	367.723159757257	393.482442974616	477.467035135024	384.498338328984	493.206060450534	378.201164157612	0.38365388376988	0.0161155088718548	0.34665174893153	Rgs7bp	13	105082412	105191438	-	7077	protein_coding	regulator of G-protein signalling 7 binding protein [Source:MGI Symbol;Acc:MGI:106334]	-	428	520	533	604	250	413	290	370	425	469	536	442	2.43784280380619	3.24935015242728	2.75478451970507	3.53384972285234	1.84663237856086	2.65391036192686	1.58804125926113	1.97179898407165	2.05056904304881	2.16852588495646	2.62447951963399
ENSMUSG00000029545	2823.76886763256	3242.21742339691	2980.83405079316	3080.53817320901	3725.74286168947	2565.58336262438	3048.39275857814	2601.6738314693	2556.75749901811	2521.14017300367	2352.59410408881	2364.4038090004	3069.78078989091	2574.1603625264	0.253898415927951	0.0161552767243748	0.346809699370271	Acads	5	115248358	115257405	-	2269	protein_coding	acyl-Coenzyme A dehydrogenase, short chain [Source:MGI Symbol;Acc:MGI:87868]	-	2727	2944	3239	2927	2737	2222	3037	2712	2955	3005	2641	2718	48.4464285760913	57.3780355871571	52.21389272232	53.4131954796788	63.0565106531456	44.5343330614375	51.8708393353737	45.0780685200839	44.4690295104604	43.3362116746899	40.3330903556927
ENSMUSG00000048327	277.510105069867	70.4829874651501	87.427982348055	149.448725861182	141.570061240667	41.5666071352284	36.1350475168959	108.403076311221	77.0055558079904	27.6863979065295	94.4244509781951	31.3166067417272	128.001078186691	62.4951892104265	1.03511293882444	0.0161649480558577	0.346809699370271	Ckap2l	2	129110130	129139132	-	3137	protein_coding	cytoskeleton associated protein 2-like [Source:MGI Symbol;Acc:MGI:1917716]	-	268	64	95	142	104	36	36	113	89	33	106	36	3.44374828623674	0.902210383412977	1.1076912038578	1.87427865731215	1.73303946914864	0.521883271465721	0.444734644020177	1.35854502008382	0.968746508257361	0.344223395771234	1.17089766663634
ENSMUSG00000025163	20.7097093335721	13.2155601497157	23.9276583268361	17.8917488707049	2.72250117770513	32.3295833273999	12.0450158389653	10.5525118533047	6.05661674894306	10.0677810569198	6.23557695139024	4.34952871412878	18.4661268643223	8.21783852727531	1.18329841087544	0.0162263611404805	0.347547313075811	Cd7	11	120927573	120930244	-	1133	protein_coding	CD7 antigen [Source:MGI Symbol;Acc:MGI:88344]	-	20	12	26	17	2	28	12	11	7	12	7	5	0.71155948241524	0.468374995493134	0.839369256924324	0.621268516314657	0.0922762036580773	1.12386336747237	0.410453832977727	0.366161674370902	0.210961299669996	0.346571063960318	0.214089675612145
ENSMUSG00000032952	77.6614100008956	64.9765040694353	72.7032695315405	35.7834977414097	49.0050211986923	87.7517261743711	53.1988199554301	47.0066437101753	45.8572410991403	42.7880694919092	36.522665001	33.0564182273787	64.6469047860574	43.0716429141723	0.590530080220241	0.0162415142968	0.347547313075811	Ap4b1	3	103716836	103729341	+	2907	protein_coding	adaptor-related protein complex AP-4, beta 1 [Source:MGI Symbol;Acc:MGI:1337130]	-	75	59	79	34	36	76	53	49	53	51	41	38	1.03998567282826	0.897530768367432	0.994012120339835	0.484277419321986	0.647361849811775	1.18892361843716	0.706551491127151	0.635713096164411	0.622537475251049	0.574071660039533	0.488727097214161
ENSMUSG00000108503	4.14194186671443	6.60778007485783	5.52176730619295	10.5245581592382	1.36125058885256	10.3916517838071	5.01875659956888	0	1.73046192826945	0	1.78159341468293	0.869905742825755	6.42482496327717	1.56678628089117	2.07074274061561	0.0162640375798839	1	Gm20949	7	25121266	25122217	-	952	processed_pseudogene	predicted gene, 20949 [Source:MGI Symbol;Acc:MGI:5434304]	-	4	6	6	10	1	9	5	0	2	0	2	1	0.169369095289174	0.278712641750904	0.230528127366336	0.434934026807036	0.0549101569036773	0.429923272738436	0.203538249634001	0	0.0717344395336451	0	0.0727982000205763
ENSMUSG00000069910	119.08082866804	52.8622405988626	36.8117820412863	62.0948931395051	73.5075317980385	73.8961904626283	36.1350475168959	47.9659629695667	53.6443197763528	56.2117775678023	35.6318682936585	23.4874550562954	69.7089111180601	42.1794051967619	0.722176361975844	0.0162955073305445	0.347631892341351	Spdl1	11	34700017	34724468	-	3460	protein_coding	spindle apparatus coiled-coil protein 1 [Source:MGI Symbol;Acc:MGI:1917635]	-	115	48	40	59	54	64	36	50	62	67	40	27	1.33977807458517	0.613490022998521	0.422856988926304	0.706051283748485	0.815844319683307	0.841180641021434	0.403217508176675	0.545009428615649	0.611857450727438	0.633635742685253	0.400600499535194
ENSMUSG00000066607	214.345491602472	253.298236202883	202.464801227075	223.120632975849	246.386356582314	251.708898763328	246.922824698789	168.840189652875	154.876342580115	182.898022534043	103.33241805161	177.460771536454	231.88740289232	172.388428175648	0.427993980857701	0.016375181632032	0.347926899606917	Insyn1	9	58395886	58407063	+	2331	protein_coding	inhibitory synaptic factor 1 [Source:MGI Symbol;Acc:MGI:2442108]	-	207	230	220	212	181	218	246	176	179	218	116	204	3.57963871665227	4.36342914613026	3.45215293833873	3.76577112939953	4.05906433135412	4.25304143815454	4.08983524309618	2.84760996696513	2.62207687088147	3.06023785828024	1.72442102631323
ENSMUSG00000024107	14.4967965335005	9.91167011228674	19.3261855716753	22.1015721344001	9.52875412196795	30.0203273754427	4.0150052796551	14.38978889087	10.3827715696167	9.22879930217649	4.45398353670732	6.95924594260604	17.5642176415456	8.23826575360527	1.09551809271289	0.0163859485400842	0.347926899606917	Lhcgr	17	89023909	89099418	-	7645	protein_coding	luteinizing hormone/choriogonadotropin receptor [Source:MGI Symbol;Acc:MGI:96783]	-	14	9	21	21	7	26	4	15	12	11	5	8	0.0738178973843724	0.0520603861897044	0.100473475524478	0.113737096977453	0.0478641315377509	0.154661156119785	0.0202766162094513	0.0739986640814969	0.0535967454043402	0.0470821361471272	0.0226631414060133
ENSMUSG00000024773	1629.85412455213	1759.87209327047	1797.3352581658	1681.82439384626	1637.58445838964	1862.41492525343	1737.49353477074	1475.43302094387	1410.3264715396	1471.57399781978	1586.50893577515	1414.46673783468	1728.14754224629	1515.9671164473	0.189506895141735	0.0164519516404627	0.348309137470065	Atg2a	19	6291698	6312365	+	7693	protein_coding	autophagy related 2A [Source:MGI Symbol;Acc:MGI:1916291]	-	1574	1598	1953	1598	1203	1613	1731	1538	1630	1754	1781	1626	8.24745814694761	9.18593585175013	9.28573170359688	8.60085006168512	8.17446856296346	9.53507314670764	8.71995642872392	7.53998901388172	7.23480007089101	7.46061827992102	8.02224240954681
ENSMUSG00000038068	507.387878672518	438.316078298902	651.568542130768	620.948931395051	454.657696676757	579.623243941241	361.350475168959	436.490263023057	434.345943995631	396.838369993589	344.738325741146	564.568827093915	542.083728519206	423.055367502716	0.358408342772269	0.0164672143403694	0.348309137470065	Rnf144b	13	47276132	47401467	+	4936	protein_coding	ring finger protein 144B [Source:MGI Symbol;Acc:MGI:2384986]	-	490	398	708	590	334	502	360	455	502	473	387	649	4.00158506738724	3.56574504014216	5.24647644161765	4.94922496306677	3.53721085298794	4.62502367492323	2.82644363511202	3.47653299623021	3.47266770572195	3.13564546724592	2.7168359040094
ENSMUSG00000024542	573.658948539948	450.430341769475	425.176082576857	472.552661349793	392.040169589539	463.005818367405	380.421750247321	423.059793391578	372.914545542066	391.804479465129	391.059754522902	370.579846443772	462.810670365503	388.306694935461	0.254711781993988	0.0164885068414548	0.348309137470065	Cep192	18	67933177	68018241	+	12484	protein_coding	centrosomal protein 192 [Source:MGI Symbol;Acc:MGI:1918049]	-	554	409	462	449	288	401	379	441	431	467	439	426	1.78882200833612	1.44881159742158	1.35362334575952	1.48919961463164	1.20594738699316	1.46075037572042	1.17651760291484	1.33227825496231	1.17884898085265	1.22406388325796	1.21853597157159
ENSMUSG00000028906	1734.43815668667	1735.64356632932	1675.85637742956	2093.33461787247	2375.38227754773	1970.94995499541	1815.78613772402	1413.07726908343	1633.55606028636	1598.26024278602	1591.8537160192	1651.95100562611	1930.93415847686	1617.41407192086	0.254991535290799	0.0165804748598562	0.348926221407027	Epb41	4	131650724	131802632	-	16386	protein_coding	erythrocyte membrane protein band 4.1 [Source:MGI Symbol;Acc:MGI:95401]	-	1675	1576	1821	1989	1745	1707	1809	1473	1888	1905	1787	1899	4.1205291002703	4.25329620281797	4.06486957745699	5.02599632559424	5.56688325733339	4.73746445671382	4.27837251672999	3.39031387000359	3.9342658364221	3.80419694894377	3.7790200485721
ENSMUSG00000047222	128.400197868147	178.410062021161	256.762179737972	231.540279503239	69.4237800314808	255.172782691263	104.390137271033	95.9319259391334	212.846817177142	75.5083579268986	45.4306320744146	96.5595374536588	186.618213642211	105.11123464038	0.82946966964558	0.0165812484895128	0.348926221407027	Rnase2a	14	51492719	51493569	-	690	protein_coding	ribonuclease, RNase A family, 2A (liver, eosinophil-derived neurotoxin) [Source:MGI Symbol;Acc:MGI:1890465]	-	124	162	279	220	51	221	104	100	246	90	51	111	7.24408802923782	10.3826518022684	14.7898828148594	13.2018235615167	3.86376512751789	14.5656066341361	5.84113478833714	5.46589166089897	12.1736462777271	4.26809799420696	2.56123058507175
ENSMUSG00000069306	3.10645640003582	8.81037343314377	5.52176730619295	1.05245581592382	2.72250117770513	4.61851190391427	1.00375131991378	0	0	2.51694526422995	0	0.869905742825755	4.30534433948596	0.731767054494914	2.53976505687896	0.0166476112825047	1	H4c17	13	21995916	21996317	+	402	protein_coding	H4 clustered histone 17 [Source:MGI Symbol;Acc:MGI:2448441]	-	3	8	6	1	2	4	1	0	0	3	0	1	0.300819736409129	0.880047877104014	0.545927306598886	0.102999301870721	0.26007198692687	0.452500780151455	0.0964021958465516	0	0	0.2441946613601	0
ENSMUSG00000102376	176.032529335363	106.825777876868	96.6309278583766	154.711004940801	85.7587870977116	100.452633910135	59.2213278749127	59.4777940822627	90.8492512341459	130.881153739958	67.7005497579512	33.0564182273787	120.068610169876	73.5310824861015	0.707099448759315	0.0166847893470318	0.350514918526741	Gm37975	2	11537407	11539505	-	2099	TEC	predicted gene, 37975 [Source:MGI Symbol;Acc:MGI:5611203]	-	170	97	105	147	63	87	59	62	105	156	76	38	3.2647325371129	2.04362713910159	1.82972777604724	2.89978120283391	1.56898121508097	1.88491689912065	1.08931266369153	1.11401069677588	1.70809303853815	2.43194149646095	1.25466778653853
ENSMUSG00000067279	298.219814403439	1209.22375369898	546.654963313102	1106.13106253593	3782.91538642128	546.139032637862	1098.10394398567	337.680379305749	440.402560744574	214.779329214289	301.980083788756	260.101817104901	1248.21400216843	442.174685690657	1.49713017310894	0.016708662597332	0.350514918526741	Ppp1r3c	19	36709131	36714053	-	2725	protein_coding	protein phosphatase 1, regulatory subunit 3C [Source:MGI Symbol;Acc:MGI:1858229]	-	288	1098	594	1051	2779	473	1094	352	509	256	339	299	4.26026982293619	17.8187895762479	7.97314310019172	15.9696921243975	53.3103671139904	7.89368929749345	15.5583592319131	4.87176428109777	6.37802089833749	3.07407473882454	4.31082889839276
ENSMUSG00000005312	4115.01924458079	4719.05627012763	4506.68241640448	4364.53426863606	4158.62054894459	4162.43385340273	4177.61299348113	3763.4094545922	4222.32710497745	3699.07055666329	3497.26787302259	3234.30955182616	4337.72443368271	3765.66625576047	0.20420144030197	0.016724939168705	0.350514918526741	Ubqln1	13	58323970	58363467	-	4406	protein_coding	ubiquilin 1 [Source:MGI Symbol;Acc:MGI:1860276]	-	3974	4285	4897	4147	3055	3605	4162	3923	4880	4409	3926	3718	36.3575403435415	43.0079457462285	40.653246338581	38.9717471976549	36.2456885910983	37.2088433728603	36.6075414261384	33.5802500230086	37.8189956658905	32.7443647525	30.8768790380509
ENSMUSG00000105140	51.7742733339304	20.9246369037165	14.7247128165145	35.7834977414097	36.7537658990192	20.7833035676142	7.02625923939643	10.5525118533047	12.1132334978861	30.2033431707594	18.7067308541707	9.56896317108331	30.1240317103674	14.6951736311001	1.02607863640451	0.0167418365528036	0.350514918526741	Gm43127	9	110722179	110724967	-	2789	TEC	predicted gene 43127 [Source:MGI Symbol;Acc:MGI:5663264]	-	50	19	16	34	27	18	7	11	14	36	21	11	0.722657667243158	0.301264148678758	0.209836526595197	0.504766747210116	0.506063346379391	0.293500864572959	0.0972663245292923	0.148749077469427	0.17140132845185	0.422371834493052	0.260914595699419
ENSMUSG00000010311	180.174471202078	136.560788213728	181.298026553335	213.648530632535	53.08877296525	124.699821405685	66.2475871143092	60.437113341654	159.202497400789	103.194755833428	75.7177201240244	66.1128364547574	148.245068495435	88.4854183781603	0.745968358383063	0.0168020797338284	0.351329781439456	Optc	1	133824937	133835737	-	2575	protein_coding	opticin [Source:MGI Symbol;Acc:MGI:2151113]	-	174	124	197	203	39	108	66	63	184	123	85	76	2.72384969868554	2.12954497950878	2.79832796885386	3.26421787513089	0.791729827386304	1.90735668651025	0.9932982758061	0.922727419414674	2.43991811732613	1.56303549846104	1.14385055255632
ENSMUSG00000026393	3212.07591763704	2768.65985136543	3611.23581825019	3000.5515311988	2943.02377309925	2828.83854114749	2881.77003947245	2147.9158217772	2740.18646341467	2844.14814857985	2462.1620990918	2460.96334645406	3060.7309054497	2589.52431979834	0.241421646314678	0.0169158581974685	0.352367377395308	Nek7	1	138410613	138547879	-	7376	protein_coding	NIMA (never in mitosis gene a)-related expressed kinase 7 [Source:MGI Symbol;Acc:MGI:1890645]	-	3102	2514	3924	2851	2162	2450	2871	2239	3167	3390	2764	2829	16.9524319676939	15.0725499244488	19.4588742303823	16.0042985185245	15.3223159955144	15.1053422712571	15.0843035681576	11.4483604742942	14.660940038158	15.0390275039912	12.9850828405466
ENSMUSG00000027634	1185.63085934701	1334.77157512128	1306.81826246566	1319.77959316846	1634.86195721193	1228.5241664412	1288.81669476929	1006.32590310151	1162.87041579707	886.803714763687	1032.43338380876	1224.82728589866	1335.06440229259	1100.34623302316	0.278570734070715	0.0169446397467082	0.352521248871858	Ndrg3	2	156769265	156833976	-	8388	protein_coding	N-myc downstream regulated gene 3 [Source:MGI Symbol;Acc:MGI:1352499]	-	1145	1212	1420	1254	1201	1064	1284	1049	1344	1057	1159	1408	5.50247641359713	6.38978968279277	6.19212255004983	6.19012542530345	7.48469691417898	5.7685757538335	5.93225186286634	4.71657968893096	5.47111078743589	4.12341958103503	4.78798309253119
ENSMUSG00000060429	2281.17448309297	2582.54071259027	2509.64324066469	2971.08276835293	2141.24717626508	2424.71874955499	2269.48173432505	2144.07854473963	2283.34451435153	1996.7765762891	2134.34891079015	1985.12490512837	2485.06785508682	2135.52586427064	0.219131180532388	0.0170738235873601	0.352839892042046	Sntb1	15	55499784	55770345	-	5324	protein_coding	syntrophin, basic 1 [Source:MGI Symbol;Acc:MGI:101781]	-	2203	2345	2727	2823	1573	2100	2261	2235	2639	2380	2396	2282	16.679674648281	19.4781257810665	18.7351300265544	21.954986050109	15.4447295872707	17.9376952762894	16.4579407688278	15.8325034276021	16.9252855939785	14.6278289633665	15.5946761702981
ENSMUSG00000027710	1220.83736521408	1244.46524743156	1154.96966154536	1192.43243944168	1255.07304292206	1083.0410414679	1092.08143606619	1163.65426164169	1036.5466950334	1042.0153393912	995.019922100415	882.084423225316	1191.80313300377	1035.23367957637	0.203330794384999	0.0171305805425761	0.352839892042046	Acad9	3	36120128	36147002	+	8192	protein_coding	acyl-Coenzyme A dehydrogenase family, member 9 [Source:MGI Symbol;Acc:MGI:1914272]	-	1179	1130	1255	1133	922	938	1088	1213	1198	1242	1117	1014	5.80142906205233	6.10001447530013	5.60355195011808	5.72664551096799	5.88343026870866	5.20712842335175	5.1469734876198	5.58445720632643	4.99345955507593	4.96103870859847	4.72488044010501
ENSMUSG00000033964	725.875312141704	646.461150656924	741.757408131919	769.345201440309	632.981523816443	636.20001476419	630.355828905851	613.964326010454	638.540451531426	563.795739187509	595.942997211439	494.976367667855	692.103435158582	589.595951752422	0.232882933113056	0.0171670522537502	0.352839892042046	Zbtb41	1	139350026	139380743	+	8400	protein_coding	zinc finger and BTB domain containing 41 [Source:MGI Symbol;Acc:MGI:2444487]	ZBTB	701	587	806	731	465	551	628	640	738	672	669	569	3.36395251426847	3.09030383559141	3.5096626679706	3.60328343408735	2.8937652688238	2.98303058943773	2.89729913745679	2.87349733030117	2.99993426129704	2.61776676978027	2.75977976278005
ENSMUSG00000024538	2111.35486655768	1852.38101431848	2236.31575900814	1834.43048715521	1584.49568542439	1660.35502945718	1182.41905485843	1527.236260951	2095.5893951343	1473.25196132927	1361.13736881776	1147.40567478717	1879.88880698685	1464.50661931299	0.360447352289831	0.0172024374922892	0.352839892042046	Ppic	18	53539404	53551187	-	1403	protein_coding	peptidylprolyl isomerase C [Source:MGI Symbol;Acc:MGI:97751]	-	2039	1682	2430	1743	1164	1438	1178	1592	2422	1756	1528	1319	58.5828747684396	53.0164551651959	63.3516926495827	51.4398922527355	43.3695526367485	46.610805592807	32.5387300472627	42.7952435613992	58.9455643435727	40.9550823924996	37.739251051009
ENSMUSG00000001436	581.942832273377	600.206690132919	564.140559782713	696.725750141566	525.44272729709	667.374970115612	531.988199554301	495.008737845928	542.499814512472	573.024538489686	445.398353670732	371.449752186597	605.972254957213	493.228232709953	0.29742947511699	0.0172257873316605	0.352839892042046	Slc19a1	10	76868075	76896836	+	4644	protein_coding	solute carrier family 19 (folate transporter), member 1 [Source:MGI Symbol;Acc:MGI:103182]	-	562	545	613	662	386	578	530	516	627	683	500	427	4.87815088490498	5.1897526215202	4.8281180898628	5.90236567851932	4.34494943533766	5.66005982304434	4.42279324872228	4.19051694002255	4.61009624196715	4.81248574440118	3.73082937228621
ENSMUSG00000031647	343.781174937298	278.628059823172	229.153343207007	334.680949463773	215.077593038705	232.080223171692	201.754015302669	225.440025956963	217.172971997816	213.940347459546	237.842720860171	139.184918852121	272.233557273608	205.889166738214	0.40448263927073	0.0172452854676257	0.352839892042046	Mfap3l	8	61085861	61129763	+	6837	protein_coding	microfibrillar-associated protein 3-like [Source:MGI Symbol;Acc:MGI:1918556]	-	332	253	249	318	158	201	201	235	251	255	267	160	1.95741822924811	1.63642952663341	1.33212011934901	1.92584741172232	1.20803951452736	1.33695217338737	1.13931406008382	1.29632051018688	1.253553297897	1.22043755721436	1.35323516703453
ENSMUSG00000022299	599.546085206914	483.469242143764	611.075581885353	574.640875494403	515.913973175122	593.478779652983	438.63932680232	443.205497838796	462.033334847942	379.21975314398	417.783655743146	607.194208492377	563.020756259757	458.012629478094	0.298426839153942	0.0173275743249368	0.353787412827736	Slc25a32	15	38954626	38976111	-	6081	protein_coding	solute carrier family 25, member 32 [Source:MGI Symbol;Acc:MGI:1917156]	-	579	439	664	546	379	514	437	462	534	452	469	698	3.83808585249773	3.19250717923783	3.99395066863529	3.71773109130213	3.25802070253281	3.84391264599305	2.78496289313388	2.86534606752405	2.99847833882915	2.43222862181525	2.67254750294253
ENSMUSG00000061742	4.14194186671443	9.91167011228674	4.60147275516079	12.6294697910858	0	8.08239583184997	0	0	4.32615482067362	0	1.78159341468293	0	6.56115839284962	1.01795803922609	2.67362986534888	0.0174338177460393	1	Slc22a12	19	6585875	6593062	-	2263	protein_coding	solute carrier family 22 (organic anion/cation transporter), member 12 [Source:MGI Symbol;Acc:MGI:1195269]	-	4	9	5	12	0	7	0	0	5	0	2	0	0.071250277823815	0.175873465497256	0.0808155756564855	0.219561923210056	0	0.140669155473508	0	0	0.0754432019841252	0	0.0306247841005694
ENSMUSG00000120754	88.0162646676816	52.8622405988626	56.1379676129616	124.18978627901	36.7537658990192	27.7110714234856	29.1087882774995	35.4948125974793	12.9784644620208	63.7626133604921	36.522665001	14.7883976280378	64.2785160801701	32.1092902210883	1.00331255635535	0.0174794727355183	0.355128572457626	ENSMUSG00000120754	12	113389913	113390546	-	634	lncRNA	novel transcript	-	85	48	61	118	27	24	29	37	15	76	41	17	5.40431671561512	3.34806857977111	3.51925063417925	7.70642726110334	2.22619979976675	1.72150139073393	1.77264479365788	2.20101284073739	0.807861038281114	3.92252118500198	2.24089853564916
ENSMUSG00000028753	5.17742733339304	3.30389003742891	1.84058910206432	0	2.72250117770513	1.15462797597857	0	0	0	0	0	0	2.36650593776166	0	3.832110649612	0.0174815058595107	1	Vwa5b1	4	138292671	138363195	-	7805	protein_coding	von Willebrand factor A domain containing 5B1 [Source:MGI Symbol;Acc:MGI:1922968]	-	5	3	2	0	2	1	0	0	0	0	0	0	0.0258230907615781	0.0169977216493825	0.0093727429960603	0	0.0133951234778477	0.00582656353686371	0	0	0	0	0
ENSMUSG00000025240	832.5303152096	850.201036298374	971.831045889958	952.472513411053	763.661580346289	938.712544470575	737.757220136625	722.367402321674	892.0531240229	649.371878171328	780.337915631122	703.753745946036	884.901505937642	747.606881038281	0.244106400514185	0.0175169818255354	0.355450555660421	Sacm1l	9	123358824	123421665	+	3738	protein_coding	SAC1 suppressor of actin mutations 1-like (yeast) [Source:MGI Symbol;Acc:MGI:1933169]	-	804	772	1056	905	561	813	735	753	1031	774	876	809	8.67017525997163	9.13314534416694	10.3331858738588	10.0246591796648	7.84536578861979	9.89091893885631	7.62010615483697	7.59741393861231	9.41789903899774	6.77551992980849	8.12068011016046
ENSMUSG00000026490	1701.30262175295	1515.38423050073	1660.21137006201	1732.3422730106	1525.96191010373	1686.91147290469	1357.07178452342	1391.97224537682	1369.66061622527	1478.28585185773	1493.86607821163	1602.36637828504	1637.01897972245	1448.87049241332	0.176335171976266	0.0175600383751643	0.355450555660421	Cdc42bpa	1	179788037	179993168	+	21522	protein_coding	CDC42 binding protein kinase alpha [Source:MGI Symbol;Acc:MGI:2441841]	-	1643	1376	1804	1646	1121	1461	1352	1451	1583	1762	1677	1842	3.07727324632036	2.82734087977325	3.06593911783264	3.16670449091353	2.72278041847176	3.08711624384482	2.43448466924004	2.54269866739868	2.51149865552076	2.67894773275766	2.70008868891483
ENSMUSG00000098609	0	4.40518671657188	1.84058910206432	7.36719071146671	5.44500235541026	0	0	0	0	0	0	0.869905742825755	3.17632814758553	0.144984290470959	3.77098725692377	0.0177047814202481	1	Anxa11os	14	25857201	25870690	-	2479	lncRNA	annexin A11, opposite strand [Source:MGI Symbol;Acc:MGI:3642737]	-	0	4	2	7	4	0	0	0	0	0	0	1	0	0.0713552332787038	0.0295095841404803	0.116918126447845	0.0843476714357415	0	0	0	0	0	0
ENSMUSG00000037313	545.700840939626	223.563225866023	196.02273936985	246.274660926173	225.967597749526	172.039568420806	147.551444027325	199.538405953397	199.868352715121	177.02515025084	201.320055859171	133.965484395166	268.261438878667	176.544815533503	0.604208276486364	0.0177479603480526	0.35863406056959	Tacc3	5	33815472	33836339	+	3552	protein_coding	transforming, acidic coiled-coil containing protein 3 [Source:MGI Symbol;Acc:MGI:1341163]	-	527	203	213	234	166	149	147	208	231	211	226	154	5.98065544643578	2.52735033287409	2.19339205869164	2.72774164650196	2.44300729611541	1.90765003726857	1.60382639677819	2.20851568460648	2.22061712650943	1.94379500430616	2.20476890918173
ENSMUSG00000020777	14320.7640041651	17987.4786604421	16116.1981776751	15304.8124751641	19657.8197536199	14513.6736580506	14002.3309127972	13892.8615145053	15351.7929966424	14295.4101190714	12789.1683273014	13228.6566311513	16316.7911215195	13926.7034169115	0.228433590648067	0.0177722186157314	0.35863406056959	Acox1	11	116062714	116089871	-	5082	protein_coding	acyl-Coenzyme A oxidase 1, palmitoyl [Source:MGI Symbol;Acc:MGI:1330812]	-	13830	16333	17512	14542	14441	12570	13950	14482	17743	17039	14357	15207	109.697983452996	142.126043748756	126.040671495809	118.481300829834	148.543016962888	112.482772147507	106.378172783919	107.474143433424	119.213943421338	109.711058614438	97.8941260651351
ENSMUSG00000026196	150.145392668398	39.646680449147	38.6523711433506	48.4129675324955	65.3400282649231	31.1749553514213	27.1012856376719	46.047324450784	40.665855314332	13.4237080758931	42.7582419523902	18.2680205993409	62.2287325682893	31.3774060050687	0.989702056088644	0.017791885824175	0.35863406056959	Bard1	1	71066657	71142305	-	5659	protein_coding	BRCA1 associated RING domain 1 [Source:MGI Symbol;Acc:MGI:1328361]	-	145	36	42	46	48	27	27	48	47	16	48	21	1.03285518261696	0.281322956296371	0.271468358503139	0.336572378546275	0.443395393156112	0.216974883714609	0.18490005897128	0.319898094732239	0.283591249557644	0.0925169383205609	0.293919998952134
ENSMUSG00000039013	10.3548546667861	6.60778007485783	10.1232400613537	1.05245581592382	8.16750353311539	5.77313987989284	2.00750263982755	2.877957778174	3.46092385653889	0	1.78159341468293	2.60971722847726	7.01316233865495	2.12294915295011	1.73261861999619	0.0178515362786624	1	Siglecf	7	43000765	43008955	+	2790	protein_coding	sialic acid binding Ig-like lectin F [Source:MGI Symbol;Acc:MGI:2681107]	-	10	6	11	1	6	5	2	3	4	0	2	3	0.144479730031625	0.0951019480096273	0.144210905004795	0.0148407596243834	0.112418213703873	0.0814987964251277	0.0277804177278235	0.0405533897421537	0.048954255509699	0	0.0248401026593508
ENSMUSG00000042688	2081.325788024	2350.1671132911	2035.69154688313	2706.91635855605	1376.22434532994	2300.01892814931	1767.60607436816	1813.11340024962	1940.71305255418	1663.700819656	1486.7397045529	1440.56391011945	2141.72401337226	1685.40616025005	0.346055278097699	0.0179310867830897	0.359428852706776	Mapk6	9	75276344	75317287	-	6675	protein_coding	mitogen-activated protein kinase 6 [Source:MGI Symbol;Acc:MGI:1354946]	-	2010	2134	2212	2572	1011	1992	1761	1890	2243	1983	1669	1656	12.1382453639603	14.137919704784	12.1211401568811	15.9543835465799	7.91752637234399	13.571362724075	10.2240052866041	10.6787555280575	11.4739424101884	9.72103277991437	8.66428362803696
ENSMUSG00000112023	526.026617072733	566.066493079487	442.661679046468	292.582716826821	578.53150026234	682.385133803333	387.448009486717	358.785403012359	507.890575947083	366.63502682283	317.123627813561	335.783616730741	514.70902334853	378.944376635548	0.440812739901924	0.0179597867929236	0.359566715658569	Lilrb4b	10	51356728	51362799	+	5439	protein_coding	leukocyte immunoglobulin-like receptor, subfamily B, member 4B [Source:MGI Symbol;Acc:MGI:102702]	-	508	514	481	278	425	591	386	374	587	437	356	386	3.76492022372536	4.17913524430613	3.23471213637843	2.11634307406955	4.08469378253867	4.94144329609961	2.75030732375457	2.59335907705753	3.68513756554051	2.62907721638623	2.26808085726912
ENSMUSG00000022003	432.832925071658	485.67183550205	530.089661394523	431.506884528764	468.270202565282	469.933586223277	358.339221209218	335.761740786967	446.459177493517	381.736698408209	366.117446717341	461.05004369765	469.717515880926	391.57738805215	0.262064312015094	0.0180725092890646	0.360509365079802	Slc25a30	14	75997557	76024477	-	4571	protein_coding	solute carrier family 25, member 30 [Source:MGI Symbol;Acc:MGI:1914804]	-	418	441	576	410	344	407	357	350	516	455	411	530	3.68617700191384	4.26648019439821	4.60915043016062	3.71392363472593	3.93402263488766	4.04919397526254	3.02670416423584	2.88779881012274	3.85454519809577	3.25717534524727	3.11571836780255
ENSMUSG00000025574	586.084774140092	196.030808887449	161.97184098166	203.123972473296	243.663855404609	136.246101165471	102.382634631205	141.019931130526	185.159426324831	169.47431445815	206.66483610322	101.778971910613	254.520225508763	151.080019093091	0.752264452936012	0.01813268970235	0.361272464601718	Tk1	11	117706352	117716918	-	5198	protein_coding	thymidine kinase 1 [Source:MGI Symbol;Acc:MGI:98763]	-	566	178	176	193	179	118	102	147	214	202	232	117	4.38925973224587	1.51434941068812	1.23847148892152	1.53738049921927	1.80014044202421	1.03235989838709	0.760460876970374	1.06657443471524	1.40576316826765	1.27161621656314	1.54660462190694
ENSMUSG00000068009	66.2710698674309	135.459491534585	221.79098679875	68.409628035048	176.962576550833	151.256264853192	57.2138252350852	94.972606679742	132.380337512613	26.0084343970428	65.0281596359268	80.0313283399695	136.69166960664	75.9391153000632	0.847815959325307	0.0182260932605377	0.362694853446714	Bpifb6	2	153742308	153754715	+	1669	protein_coding	BPI fold containing family B, member 6 [Source:MGI Symbol;Acc:MGI:2684965]	-	64	123	241	65	130	131	57	99	153	31	73	92	1.54573400805554	3.25905087861632	5.28165860973769	1.61256546308085	4.07170821953212	3.56944219357938	1.32352301715272	2.23711839038951	3.13018320093248	0.607779882138918	1.51563322607249
ENSMUSG00000034452	14.4967965335005	6.60778007485783	27.6088365309647	12.6294697910858	6.80625294426282	12.7009077357642	7.02625923939643	10.5525118533047	1.73046192826945	5.0338905284599	6.23557695139024	3.47962297130302	13.475007268406	5.67638724535395	1.27309617192995	0.0182555233680477	1	Slc24a1	9	64830143	64858889	-	5213	protein_coding	solute carrier family 24 (sodium/potassium/calcium exchanger), member 1 [Source:MGI Symbol;Acc:MGI:2384871]	-	14	6	30	12	5	11	7	11	2	6	7	4	0.108255865241421	0.0508986063584999	0.210495662049446	0.0953133766016416	0.0501385664418769	0.0959600254090608	0.052038323251908	0.0795820404876716	0.0131001700433589	0.0376620962465989	0.0465305203277499
ENSMUSG00000024087	614.042881740414	580.383349908346	488.676406598076	659.889796584232	639.787776760705	636.20001476419	548.048220672921	496.927376364711	494.912111485062	306.228340481311	388.387364400878	578.487318979127	603.163371059327	468.831788730668	0.363446503733831	0.0182827219620607	0.362905667301899	Cyp1b1	17	80008966	80022490	-	5840	protein_coding	cytochrome P450, family 1, subfamily b, polypeptide 1 [Source:MGI Symbol;Acc:MGI:88590]	-	593	527	531	627	470	551	546	518	572	365	436	665	4.09310580385997	3.99061778587315	3.32576297720352	4.44544281399361	4.20702065153791	4.29066043686249	3.62320389910125	3.34523800931252	3.34439714395627	2.04513028889084	2.5870286368956
ENSMUSG00000050234	378.98768080437	470.253681994049	616.597349191546	413.615135658059	300.836380136417	497.644657646762	238.892814139479	327.127867452445	400.601936394377	296.160559424391	269.020605617122	432.3431541844	446.322480905201	327.357822868702	0.448072005438015	0.0183027620032699	0.362905667301899	Gja4	4	127205214	127207832	-	1685	protein_coding	gap junction protein, alpha 4 [Source:MGI Symbol;Acc:MGI:95715]	-	366	427	670	393	221	431	238	341	463	353	302	497	8.75572887385718	11.2065087756982	14.5440218357412	9.65723899427164	6.85617669512076	11.6322240609201	5.47381394054283	7.63246082429032	9.38243896732402	6.85513108110115	6.21061534086521
ENSMUSG00000049694	6.21291280007164	3.30389003742891	0	4.20982326369526	1.36125058885256	4.61851190391427	2.00750263982755	0	0	0	0	0	3.28439809899378	0.334583773304592	3.34437832180053	0.0183166323385839	1	BC048671	6	90278201	90282431	+	1478	protein_coding	cDNA sequence BC048671 [Source:MGI Symbol;Acc:MGI:2679261]	-	6	3	0	4	1	4	2	0	0	0	0	0	0.163639423594682	0.0897613108751218	0	0.112058780384384	0.0353683825252374	0.123075313681248	0.0524407073481918	0	0	0	0
ENSMUSG00000041268	1172.16954828018	1131.03168947983	1071.22285740143	1177.69805801875	707.850306203334	937.557916494596	715.674691098522	609.167729713497	856.578654493376	1010.13403271095	842.693685145024	814.231775284907	1032.92172931302	808.080094741047	0.354531539404742	0.0183634237476869	0.363234253410129	Dmxl2	9	54272442	54408910	-	13285	protein_coding	Dmx-like 2 [Source:MGI Symbol;Acc:MGI:2444630]	-	1132	1027	1164	1119	520	812	713	635	990	1204	946	936	3.43475680665623	3.41862331815864	3.20480081197094	3.48761761045701	2.04612149594252	2.7795843933037	2.0798927953868	1.80269509312976	2.54453423303236	2.96555437600249	2.46750005844677
ENSMUSG00000024140	12695.0518214797	13569.0763837205	16030.6107844292	13941.8821935428	12410.5216185688	14681.0947145675	13063.8234286778	12268.7340083558	12213.6002897258	11114.8302868395	10779.530955539	12815.451403309	13888.0395860514	12042.6617287411	0.205786702057009	0.018387231500109	0.363269080848077	Epas1	17	87061128	87140838	+	5590	protein_coding	endothelial PAS domain protein 1 [Source:MGI Symbol;Acc:MGI:109169]	-	12260	12321	17419	13247	9117	12715	13015	12789	14116	13248	12101	14732	88.4076378823567	97.4712454675094	113.977999909532	98.121925627252	85.2569476327847	103.440342696313	90.2288337629756	86.2849177662854	86.2252582943651	77.5495844500202	75.0130885119357
ENSMUSG00000035683	217.451948002508	48.4570538822907	72.7032695315405	96.825935064991	84.397536508859	16.1647916636999	25.0937829978444	52.7625592665233	62.2966294177001	19.2965803590963	65.9189563432683	20.0078320849924	89.3334224423148	40.8960567449041	1.12827240912041	0.0184409528037355	0.363609196221816	Melk	4	44300876	44364675	+	2972	protein_coding	maternal embryonic leucine zipper kinase [Source:MGI Symbol;Acc:MGI:106924]	-	210	44	79	92	62	14	25	55	72	23	74	23	2.84827300893435	0.654705873579063	0.972272285944785	1.28173828411398	1.09051719417317	0.214222273779643	0.325989928754322	0.697949490346958	0.827214909723111	0.253232821773832	0.862800739409414
ENSMUSG00000020392	520.84918973934	512.102955801481	508.922886720783	512.545982354898	563.557743784962	476.861354079148	472.766871679388	402.91408894436	468.95518256102	432.075603692808	481.921018671732	433.213059927226	515.806685413435	448.640970912756	0.200357522988835	0.0185272101877169	0.363609196221816	Cdkn2aipnl	11	51858488	51868161	+	1958	protein_coding	CDKN2A interacting protein N-terminal like [Source:MGI Symbol;Acc:MGI:1261797]	-	503	465	553	487	414	413	471	420	542	515	541	498	10.3553891079919	10.5022567458538	10.33051717916	10.298562474177	11.0529266190667	9.59230011815954	9.32225973747588	8.08996630913444	9.45194664155473	8.60667700738534	9.5744133179258
ENSMUSG00000063410	1364.7698450824	1207.0211603407	1347.31122271108	1253.47487676526	1172.03675700206	1184.64830335401	1165.35528241989	1058.12914310864	1149.02672037091	1113.32878854438	1150.01854917783	1056.06557179047	1254.87702754259	1115.32067590202	0.171119580858393	0.0185555374194832	0.363609196221816	Stk24	14	121523755	121617423	-	5353	protein_coding	serine/threonine kinase 24 [Source:MGI Symbol;Acc:MGI:2385007]	-	1318	1096	1464	1191	861	1026	1161	1103	1328	1327	1291	1214	9.92497203188663	9.05431660445105	10.0035340275867	9.21244381622781	8.40805494667495	8.71636707337139	8.40519814120947	7.77120524259365	8.47101584037437	8.11175159606393	8.35711912644208
ENSMUSG00000039202	3798.16069177713	2408.53583728568	2909.05107581265	3335.23248066257	1704.28573724341	2602.53145785569	1663.21593709713	1558.89379651092	1828.23302721667	3036.27497041607	2178.88874615722	1901.6139538171	2792.96621343952	2027.85340520252	0.461946230083371	0.0185645627148673	0.363609196221816	Abhd2	7	78922947	79015256	+	10573	protein_coding	abhydrolase domain containing 2 [Source:MGI Symbol;Acc:MGI:1914344]	-	3668	2187	3161	3169	1252	2254	1657	1625	2113	3619	2446	2186	13.9843478938735	9.14729987119366	10.9354304816663	12.4103588978135	6.1900724159766	9.69484954368379	6.0734751049021	5.79649203138464	6.82395143002609	11.2003427833098	8.01651878285792
ENSMUSG00000033762	108.725974001254	40.7479771282899	37.7320765923185	30.5212186617906	61.2562764983654	42.721235111207	27.1012856376719	14.38978889087	51.0486268839487	24.3304708875562	31.1778847569512	29.5767952560757	53.6174596655375	29.604142052179	0.853866795478131	0.0185820835903495	0.363609196221816	Recql4	15	76587753	76594748	-	4342	protein_coding	RecQ protein-like 4 [Source:MGI Symbol;Acc:MGI:1931028]	-	105	37	41	29	45	37	27	15	59	29	35	34	0.974788966208303	0.376837635998535	0.345385147680133	0.276546720683755	0.54176672541537	0.387522835327772	0.240983287360311	0.130290139774999	0.463977429724295	0.218549160305239	0.279322434901612
ENSMUSG00000029819	0	5.50648339571485	0	3.15736744777145	6.80625294426282	2.30925595195713	0	0	0	0	0	0	2.96322662328438	0	4.14458148913407	0.0186004231885654	1	Npy	6	49799690	49806487	+	566	protein_coding	neuropeptide Y [Source:MGI Symbol;Acc:MGI:97374]	-	0	5	0	3	5	2	0	0	0	0	0	0	0	0.390657295269229	0	0.219464943561995	0.461788598695237	0.160693739947778	0	0	0	0	0
ENSMUSG00000072082	251.622968402902	78.1920642191509	78.2250368377334	110.507860672001	104.816295341647	76.2054464145854	57.2138252350852	92.094648901568	96.905867983089	40.2711242276792	78.3901102460488	40.8855699128105	116.59494531467	67.6268577510468	0.787149079249717	0.0186030559212837	0.363609196221816	Ccnf	17	24441172	24470458	-	7800	protein_coding	cyclin F [Source:MGI Symbol;Acc:MGI:102551]	-	243	71	85	105	77	66	57	96	112	48	88	47	1.2558066996095	0.402537283786903	0.39859692449752	0.557384683585016	0.516042838675277	0.384799701890334	0.283199989183062	0.464180337971728	0.490295697489447	0.201366674598482	0.390945000315628
ENSMUSG00000120025	3.10645640003582	13.2155601497157	10.1232400613537	6.31473489554289	9.52875412196795	0	2.00750263982755	1.91863851878267	0	3.35592701897327	1.78159341468293	1.73981148565151	7.04812427143601	1.80057884631965	1.96865472245188	0.0187452650301369	1	ENSMUSG00000120025	8	127320858	127321308	-	451	lncRNA	novel transcript	-	3	12	11	6	7	0	2	2	0	4	2	2	0.268136439105255	1.17664937892177	0.892125110783545	0.550852142155607	0.811355400456997	0	0.171856686165471	0.167249013127286	0	0.290218045430185	0.1536671539237
ENSMUSG00000044811	107.690488534575	84.7998442940088	82.8265095928942	63.1473489554289	99.3712929862372	92.3702380782854	68.2550897541367	61.3964326010453	77.0055558079904	74.6693761721553	48.103022196439	59.1535905121513	88.3676204069049	64.7638445073197	0.445346059710443	0.0188401335866616	0.365503468825947	Cd300c2	11	114887547	114892706	-	1275	protein_coding	CD300C molecule 2 [Source:MGI Symbol;Acc:MGI:2153249]	-	104	77	90	60	73	80	68	64	89	89	54	68	3.28801870321383	2.67068646939977	2.58191502650297	1.94850444009552	2.99296961896311	2.85341668424918	2.06686307895007	1.8931276529043	2.38349631090458	2.28412982853377	1.46761171241482
ENSMUSG00000015354	4315.90342511644	6515.27115380982	5008.242946717	4523.45509684056	3731.18786404488	4056.20807961271	3218.02673164356	3839.19567608412	5557.37848263733	2655.3772537626	2631.41347348668	2213.04020974872	4691.71142769023	3352.4053045605	0.484979674331617	0.0188552496511534	0.365503468825947	Pcolce2	9	95519654	95580149	+	4625	protein_coding	procollagen C-endopeptidase enhancer 2 [Source:MGI Symbol;Acc:MGI:1923727]	-	4168	5916	5442	4298	2741	3513	3206	4002	6423	3165	2954	2544	36.326796242451	56.5664330502928	43.0384300471883	38.4782230864917	30.9803936323193	34.5423441486578	26.8636339099213	32.6343868423205	47.4199232949861	22.3925184496069	22.1322897819962
ENSMUSG00000046324	3551.71515070762	3656.30497475466	3868.91829253919	4015.11893774936	3250.66640617992	3657.8614279001	3212.00422372408	3115.86895450305	3424.58415604523	3453.24890252349	3284.36745996798	3105.56350188795	3666.76419830514	3265.93953310863	0.167301845905986	0.01893870541781	0.366259447381755	Ermp1	19	29585614	29625815	-	9338	protein_coding	endoplasmic reticulum metallopeptidase 1 [Source:MGI Symbol;Acc:MGI:106250]	-	3430	3320	4204	3815	2388	3168	3200	3248	3958	4116	3687	3570	14.806464687124	15.7226801603408	16.4671506313017	16.916129720282	13.3681123218092	15.4282510588714	13.2803367677237	13.1181399861575	14.4729340283684	14.4232277045615	13.681914180179
ENSMUSG00000021974	76.6259245342169	59.4700206737204	72.7032695315405	57.8850698758098	29.9475129547564	75.0508184386069	35.1312961969821	28.77957778174	31.14831470885	72.1524309079253	28.5054946349268	32.1865124845529	61.9471026681085	37.9839377858295	0.707548841254283	0.0190779398014181	0.367067462422253	Fgf9	14	58308004	58350177	+	4649	protein_coding	fibroblast growth factor 9 [Source:MGI Symbol;Acc:MGI:104723]	-	74	54	79	55	22	65	35	30	36	86	32	37	0.641627985853501	0.513660983979725	0.621551566751538	0.48985041177923	0.247373268700929	0.635827349180336	0.29175712961088	0.243372676662957	0.264409842084006	0.605312815124498	0.238516279353284
ENSMUSG00000042978	1054.12420507882	1115.61353597183	796.054786642816	997.728113495777	799.054095656456	924.857008758832	900.364933962656	856.672098636461	671.419228168545	812.134338591531	762.521981484293	593.275716607165	947.905290934089	766.064716241775	0.307916088780228	0.0190866722976152	0.367067462422253	Sbk1	7	125848034	125894188	+	4478	protein_coding	SH3-binding kinase 1 [Source:MGI Symbol;Acc:MGI:2135937]	-	1018	1013	865	948	587	801	897	893	776	968	856	682	9.16378335932161	10.0038626842776	7.06547946715909	8.76565921074681	6.85241481052715	8.13455539360925	7.76285248081541	7.52103274831648	5.9171461226395	7.07346536720439	6.6239534139312
ENSMUSG00000027905	366.561855204227	317.173443593176	333.146627473641	331.523582016002	393.401420178391	375.254092193034	299.117893334305	292.592374114357	280.33483237965	319.652048557204	323.359204764951	291.418423846628	352.843503443078	301.079129499516	0.226532887059405	0.0191026534067786	0.367067462422253	Ddx20	3	105585586	105594890	-	4142	protein_coding	DEAD box helicase 20 [Source:MGI Symbol;Acc:MGI:1858415]	-	354	288	362	315	289	325	298	305	324	381	363	335	3.44511951142044	3.07485583714372	3.19674574945663	3.14891395361888	3.64734950473079	3.56827782030346	2.78816935143252	2.77715330766825	2.67097349170374	3.00992618084948	3.03685547686029
ENSMUSG00000051378	167.748645601934	45.1531638448618	29.449425633029	58.9375256917337	84.397536508859	41.5666071352284	26.0975343177582	43.16936667261	57.1052436328917	16.7796350948664	50.7754123184634	19.1379263421666	71.2088174026077	35.510853063126	1.00329179410734	0.0191141520154332	0.367067462422253	Kif18b	11	102796355	102815950	-	3572	protein_coding	kinesin family member 18B [Source:MGI Symbol;Acc:MGI:2446979]	-	162	41	32	56	62	36	26	45	66	20	57	22	1.82816204870363	0.507592004144329	0.327678652113105	0.649137817389045	0.907339613964908	0.458328057835377	0.282081677208331	0.475128600422489	0.630909617130178	0.183214359587085	0.552956540581824
ENSMUSG00000097440	176.032529335363	205.942478999736	173.015375594046	166.288018915963	117.067550641321	144.328496997321	93.3488727519811	165.962231874701	129.784644620208	128.364208475728	119.366758783756	91.3401029967043	163.779075080625	121.361136583846	0.435227886141247	0.0191436290589968	0.36720555995936	Gm6277	18	11953728	11973926	-	4421	lncRNA	predicted gene 6277 [Source:MGI Symbol;Acc:MGI:3779583]	-	170	187	188	158	86	125	93	173	150	153	134	105	1.55002795643519	1.87052474308463	1.55541740645093	1.47977915802323	1.0168749979683	1.28580435436613	0.815221102447224	1.4758278388634	1.15852499043254	1.1324313384313	1.05029640129211
ENSMUSG00000024228	550.878268273019	710.336358047216	724.271811662308	726.194512987433	830.362859200065	693.931413563119	605.262045908006	597.655898600801	578.83951500613	529.397487243033	558.529535503098	675.916762175612	705.995870622193	590.933540739447	0.255781023995701	0.0192660655959769	0.368311922012436	Nudt12	17	59306613	59320367	-	4401	protein_coding	nudix (nucleoside diphosphate linked moiety X)-type motif 12 [Source:MGI Symbol;Acc:MGI:1915243]	-	532	645	787	690	610	601	603	623	669	631	627	777	4.87271923861259	6.48112968797716	6.54083184495629	6.49169424060453	7.24549564124142	6.2102416204358	5.30980929024749	5.33883855548885	5.19050258187959	4.69157814056848	4.93677991196115
ENSMUSG00000030677	298.219814403439	106.825777876868	99.391811511473	151.553637493029	142.931311829519	57.7313987989284	44.1650580762061	101.687841495481	107.288639552706	54.5338140583156	120.257555491098	53.9341560551968	142.775625318876	80.3111774548339	0.830269360630601	0.0192746093501296	0.368311922012436	Kif22	7	126626901	126641643	-	4903	protein_coding	kinesin family member 22 [Source:MGI Symbol;Acc:MGI:109233]	-	288	97	108	144	105	50	44	106	124	65	135	62	2.36778202478097	0.8748874903068	0.805696510411898	1.2160766034453	1.11948180381228	0.463760232563953	0.347779326969979	0.815368786616665	0.863563850506602	0.433802875881393	0.954112244201964
ENSMUSG00000026110	673.065553341095	538.534076100913	686.53973506999	612.529284867661	558.112741429552	520.737217166334	512.916924475939	385.646342275316	478.472723166502	572.185556734943	455.197117451488	541.951277780445	598.253101329257	491.061656980772	0.285531952336571	0.0193057851936107	0.368311922012436	Mgat4a	1	37478421	37580097	-	12881	protein_coding	mannoside acetylglucosaminyltransferase 4, isoenzyme A [Source:MGI Symbol;Acc:MGI:2662992]	-	650	489	746	582	410	451	511	402	553	682	511	623	2.03411218393255	1.67881037560509	2.11835561201968	1.8708274716933	1.66388731019667	1.59225402614353	1.53739087611135	1.17702742714087	1.46591980821072	1.73251003123801	1.37467145254288
ENSMUSG00000025001	286.829474269974	95.8128110854385	82.8265095928942	113.665228119772	96.6487918085321	76.2054464145854	85.3188621926709	60.437113341654	111.614794373379	56.2117775678023	75.7177201240244	56.5438732836741	125.331376881866	74.3073568138675	0.75561820161965	0.0193647017697116	0.368311922012436	Hells	19	38919359	38959495	+	7205	protein_coding	helicase, lymphoid specific [Source:MGI Symbol;Acc:MGI:106209]	-	277	87	90	108	71	66	85	63	129	67	85	65	1.5497330986862	0.533983248678622	0.45689682981142	0.620654780016547	0.515126623932458	0.41657705409363	0.457191260524173	0.329774199166243	0.611350662751415	0.304285866716305	0.408801550705415
ENSMUSG00000030669	2754.3913413651	56.1661306362915	28.5291310819969	55.7801582439622	215.077593038705	378.71797612097	14.0525184787929	37.413451116262	174.776654755214	110.745591626118	99.7692312222439	221.825964420568	581.443721747837	109.763901936533	2.40502764521262	0.0194699105145141	0.368311922012436	Calca	7	114230713	114235592	-	1684	protein_coding	calcitonin/calcitonin-related polypeptide, alpha [Source:MGI Symbol;Acc:MGI:2151253]	-	2660	51	31	53	158	328	14	39	202	132	112	255	63.6723199796141	1.33927713601444	0.673331957129386	1.30314912449975	4.90461173445578	8.8576221596868	0.322180260228262	0.873439100919189	4.09584906771915	2.56491399651867	2.30464230373929
ENSMUSG00000025019	151.180878135077	150.877645042587	72.7032695315405	151.553637493029	106.1775459305	96.9887499821996	82.3076082329296	56.5998363040887	70.0837080949126	130.042171985214	71.2637365873171	80.0313283399695	121.580287685822	81.7213982574053	0.571472112667426	0.0195179598289446	0.368311922012436	Lcor	19	41471076	41574975	+	12765	protein_coding	ligand dependent nuclear receptor corepressor [Source:MGI Symbol;Acc:MGI:2443930]	HTH	146	137	79	144	78	84	82	59	81	155	80	92	0.46104483533946	0.474615714684944	0.226368447616757	0.467091546156858	0.319420964437091	0.299256685157743	0.248946493058028	0.174317625942184	0.216670039221247	0.397330443905153	0.217168465082925
ENSMUSG00000072421	30.0290785336796	24.2285269411454	31.2900147350934	22.1015721344001	17.6962576550833	33.4842113033784	8.0300105593102	22.0643429660007	21.6307741033681	12.5847263211498	17.8159341468293	8.69905742825755	26.47161021713	15.1374742541526	0.810756214587158	0.0195482237486276	0.368311922012436	Gm10357	13	8339886	8340149	-	264	processed_pseudogene	predicted gene 10357 [Source:MGI Symbol;Acc:MGI:3641865]	-	29	22	34	21	13	29	8	23	25	15	20	10	4.4279753624465	3.68520048537306	4.71069092587978	3.29363676663873	2.57412159787845	4.99550577178567	1.17435402213072	3.28574623706313	3.23348420625143	1.85920935353712	2.6251472128632
ENSMUSG00000106464	72.4839826675025	64.9765040694353	61.6597349191546	85.248921089829	133.402557707551	75.0508184386069	61.2288305147403	52.7625592665233	69.2184771307779	67.1185403794654	25.8331045129024	39.145758427159	82.1370864820133	52.5512117052614	0.638673956060238	0.0196322882362746	0.368311922012436	C130083M11Rik	5	52357326	52373776	-	2072	lncRNA	RIKEN cDNA C130083M11 gene [Source:MGI Symbol;Acc:MGI:3041216]	-	70	59	67	81	98	65	61	55	80	80	29	45	1.36181907698728	1.25922873727998	1.18275467148764	1.61865987814402	2.47244111896017	1.42662227139932	1.14091440470518	1.00111287901118	1.31836267251023	1.26340095066615	0.484993413650596
ENSMUSG00000072437	49.7033024005732	16.5194501871446	12.8841237144502	15.7868372388572	17.6962576550833	15.0101636877214	13.0487671588791	14.38978889087	6.92184771307779	9.22879930217649	1.78159341468293	12.1786803995606	21.266689147305	9.59157947987448	1.15598967012046	0.0196653787649127	0.368311922012436	Nanos1	19	60744425	60748352	+	3928	protein_coding	nanos C2HC-type zinc finger 1 [Source:MGI Symbol;Acc:MGI:2669254]	-	48	15	14	15	13	13	13	15	8	11	2	14	0.492584660026354	0.168873749329723	0.130366551321221	0.158117563717018	0.173006135906291	0.150507196860457	0.128258114942484	0.144022349007903	0.069542959710825	0.0916351656936831	0.0176435556058016
ENSMUSG00000006219	752.797934275348	604.611876849491	658.010603987993	686.201191982328	506.385219053154	618.880595124512	465.740612439992	646.581180829759	545.095507404876	482.414508977408	519.334480380073	496.716179153506	637.814570212137	525.980411530935	0.279663565452781	0.0196723117267154	0.368311922012436	Fblim1	4	141303373	141333407	-	4457	protein_coding	filamin binding LIM protein 1 [Source:MGI Symbol;Acc:MGI:1921452]	-	727	549	715	652	372	536	464	674	630	575	583	571	6.57510816277868	5.44718438358486	5.86776926691039	6.05710769969114	4.3630474773381	5.46899529396423	4.03448705112533	5.70331518020569	4.82650296776969	4.22149397751754	4.53266387509762
ENSMUSG00000057672	1485.9216446838	1473.5349566933	1529.52954381545	1510.27409585067	1606.27569484603	1547.20148781128	1393.20683204032	1226.96933276152	1429.36155275056	1500.9383592358	1308.58036308461	1267.45266729713	1525.45623728342	1354.41818452832	0.171038943287622	0.0196922285795841	0.368311922012436	Pkn1	8	84393165	84425808	-	10612	protein_coding	protein kinase N1 [Source:MGI Symbol;Acc:MGI:108022]	-	1435	1338	1662	1435	1180	1340	1388	1279	1652	1789	1469	1457	5.45086949812585	5.57572361413021	5.72853272700832	5.59905835565046	5.81265302104363	5.74239352270981	5.06880056819407	4.54551832798714	5.31554089673586	5.51637857041192	4.79680593433734
ENSMUSG00000060176	66.2710698674309	35.2414937325751	40.4929602454149	52.6227907961908	35.3925153101667	20.7833035676142	20.0750263982755	44.1286859320013	14.7089263902903	28.5253796612728	18.7067308541707	16.5282091136893	41.8006889198988	23.7788263916167	0.820102486205744	0.019693075395579	0.368311922012436	Kif27	13	58435316	58506936	-	5215	protein_coding	kinesin family member 27 [Source:MGI Symbol;Acc:MGI:1922300]	-	64	32	44	50	26	18	20	46	17	34	21	19	0.494694162884889	0.271355126823251	0.308608571400482	0.3969867627232	0.26062055679383	0.156965275415912	0.148623903088452	0.332669992937552	0.111308741075025	0.213336697441345	0.139538026348165
ENSMUSG00000026779	132.542139734862	30.8363070160032	52.456789408833	82.0915536420576	73.5075317980385	38.1027232072927	14.0525184787929	32.6168548193053	60.5661674894306	26.0084343970428	49.884615611122	35.666135455856	68.2561741345145	36.4657877085916	0.902666667458089	0.0198716169040481	0.369776837766684	Mastl	2	23005618	23046036	-	5777	protein_coding	microtubule associated serine/threonine kinase-like [Source:MGI Symbol;Acc:MGI:1914371]	-	128	28	57	78	54	33	14	34	70	31	56	41	0.893138327659579	0.214337435188739	0.360896033218131	0.559052468315445	0.488631010230958	0.259774768456344	0.0939157968191782	0.221966104145214	0.413742690888187	0.175590206558742	0.335902513371729
ENSMUSG00000029802	1244.65353094769	1135.4368761964	1332.58650989456	1110.34088579963	845.336615677443	1113.06136884334	732.738463537056	843.241629004982	1025.29869249965	1036.142467108	722.436129653927	1051.71604307634	1130.23596455984	901.928904146658	0.325943197737922	0.0198836122025418	0.369776837766684	Abcg2	6	58561508	58672661	+	8153	protein_coding	ATP binding cassette subfamily G member 2 (Junior blood group) [Source:MGI Symbol;Acc:MGI:1347061]	-	1202	1031	1448	1055	621	964	730	879	1185	1235	811	1209	5.94289627179513	5.59221150558512	6.49622023512787	5.35790922560915	3.98165650437861	5.37706127592706	3.46991149185932	4.06613265209351	4.96290052291768	4.95667539660038	3.4469184279582
ENSMUSG00000039195	630.610649207272	643.157260619495	757.402415499466	644.102959345375	714.656559147597	618.880595124512	452.691845281113	539.137423777929	742.368167227593	547.016104092643	485.484205501098	492.366650439377	668.135073157286	543.177399386625	0.298289409902036	0.0200037380122367	0.371172963094171	Bbln	2	32267109	32271950	-	2694	protein_coding	bublin coiled coil protein [Source:MGI Symbol;Acc:MGI:1920987]	-	609	584	823	612	525	536	451	562	858	652	545	566	9.1123590977741	9.5864458060484	11.1740822617554	9.4061990510179	10.1871181961611	9.0480000093536	6.48771748751726	7.867718887392	10.8748771273411	7.91937608526696	7.01013698936076
ENSMUSG00000113629	3.10645640003582	0	0	6.31473489554289	6.80625294426282	2.30925595195713	1.00375131991378	0	0	0	0	0	3.08945003196645	0.167291886652296	3.72495778146509	0.0200123029081492	1	Gm48558	12	15892759	15900626	-	983	lncRNA	predicted gene, 48558 [Source:MGI Symbol;Acc:MGI:6098113]	-	3	0	0	6	5	2	1	0	0	0	0	0	0.123020889152055	0	0	0.252730738669561	0.265892519696342	0.0925255918722711	0.039423888840604	0	0	0	0
ENSMUSG00000018900	780.75604187567	1016.49683484896	853.11304880681	899.849722614862	834.446610966622	820.940490920761	715.674691098522	779.926557885154	765.72940325923	755.922561023729	753.614014410878	779.435545571877	867.600458338948	758.383795541565	0.194070121536529	0.0200920146726986	0.372391592533245	Slc22a5	11	53755368	53782486	-	3071	protein_coding	solute carrier family 22 (organic cation transporter), member 5 [Source:MGI Symbol;Acc:MGI:1329012]	-	754	923	927	855	613	711	713	813	885	901	846	896	9.89697912335812	13.2912017505672	11.0410286830186	11.5278052901288	10.4344675106546	10.5287103536673	8.99751735158375	9.98437396618202	9.84006838096494	9.60032505524269	9.54592769634841
ENSMUSG00000002279	529.133073472768	480.165352106335	465.669042822272	454.660912479088	487.327710809218	458.387306463491	335.252940851201	373.175191903229	426.558865318419	380.897716653466	418.674452450488	485.407404496771	479.223899692196	403.327761945596	0.247686579515109	0.020145124737258	0.372956427298652	Lmf1	17	25798059	25881800	+	13589	protein_coding	lipase maturation factor 1 [Source:MGI Symbol;Acc:MGI:1923733]	-	511	436	506	432	358	397	334	389	493	454	470	558	1.5158091567355	1.41886591651128	1.36198598486389	1.31630515564625	1.37716241336991	1.32858211618757	0.952515272052748	1.07962321046574	1.2387797083289	1.09322440345154	1.19849976514853
ENSMUSG00000101389	84.9098082676458	79.2933608982939	126.080353491406	108.402949040153	96.6487918085321	107.380401766007	59.2213278749127	49.8846014883493	109.019101480975	57.8897410772889	30.2870880496098	85.250762796924	100.452610878673	65.2587704613433	0.621813996764669	0.0202694992072997	0.373272423379487	Ms4a4a	19	11352887	11370154	+	836	protein_coding	membrane-spanning 4-domains, subfamily A, member 4A [Source:MGI Symbol;Acc:MGI:3643932]	-	82	72	137	103	71	93	59	52	126	69	34	98	3.95383643978889	3.80862825282574	5.99409897998944	5.10142236035774	4.43957814047052	5.05896954747079	2.73500870943602	2.34588747360114	5.14634538931806	2.70074621882235	1.40928955637919
ENSMUSG00000006611	3844.75753777767	4182.724787385	3736.39587719056	3927.76510502768	2952.55252722121	3025.12529706385	2796.45117727978	3301.97689082497	3751.64146048816	2213.23386901287	2579.74726446088	1589.31779214265	3611.55352194433	2705.39474236822	0.416933365745651	0.0202714567844394	0.373272423379487	Hfe	13	23886017	23894837	-	3572	protein_coding	homeostatic iron regulator [Source:MGI Symbol;Acc:MGI:109191]	-	3713	3798	4060	3732	2169	2620	2786	3442	4336	2638	2896	1827	41.9010227582506	47.0203519936625	41.5742289868502	43.2603988302842	31.7422519788691	33.3560975424635	30.2261366424004	36.3420587256491	41.448849998128	24.1659740295365	28.0940726583327
ENSMUSG00000028713	2698.47512616445	2580.33811923198	2960.58757067045	2925.82716826821	2601.34987529725	3171.76305001312	1924.19128027471	2279.34256031381	2495.32610056454	2697.32634149977	1664.00824931385	2713.23601187353	2823.05681827424	2295.5717573067	0.29833251463741	0.0202981180644547	0.373272423379487	Cyp4b1	4	115481922	115504920	-	2256	protein_coding	cytochrome P450, family 4, subfamily b, polypeptide 1 [Source:MGI Symbol;Acc:MGI:103225]	-	2606	2343	3217	2780	1911	2747	1917	2376	2884	3215	1868	3119	46.563588312506	45.9277911554738	52.1580787841388	51.0230052298949	44.2803683379729	55.3738803763931	32.9303234902533	39.7207509953201	43.6506608336682	46.6318714807379	28.6923004946346
ENSMUSG00000018171	1850.41252895467	1911.8510349922	2159.01101672144	1636.56879376153	1359.88933826371	1668.43742528903	1347.03427132429	1320.98262018187	1643.93883185597	1614.20089612614	1386.97047333066	1459.70183646162	1764.36168966376	1462.13815488009	0.271571156708573	0.0205375570371296	0.37443507653046	Vmp1	11	86474691	86574662	-	3862	protein_coding	vacuole membrane protein 1 [Source:MGI Symbol;Acc:MGI:1923159]	-	1787	1736	2346	1555	999	1445	1342	1377	1900	1924	1557	1678	18.6519141483836	19.8783263882164	22.219043476392	16.671645155983	13.5220597884331	17.0153533261379	13.4664531911137	13.4471974204297	16.7987123547977	16.3017324736446	13.9702422521102
ENSMUSG00000087034	7.24839826675025	20.9246369037165	13.8044182654824	27.3638512140192	14.9737564773782	12.7009077357642	5.01875659956888	8.633873334522	4.32615482067362	11.7457445664064	5.34478024404878	11.3087746567348	16.1693281438518	7.72968070365909	1.05936888872425	0.0205698099252055	0.37443507653046	Cbfa2t2-ps1	5	60388826	60389555	+	730	processed_pseudogene	CBFA2/RUNX1 translocation partner 2, pseudogene 1 [Source:MGI Symbol;Acc:MGI:1333788]	-	7	19	15	26	11	11	5	9	5	14	6	13	0.386532757194196	1.15099412419871	0.751584853605315	1.47472425089421	0.787697483692204	0.685259743092375	0.265436183084341	0.46497516731757	0.233873926150788	0.627546828371983	0.284810492135296
ENSMUSG00000028896	474.252343738802	227.968412582595	259.523063391068	238.907470214706	273.611368359366	266.719062451049	206.772771902238	239.829814847833	197.272659822717	208.906456931086	236.061127445488	220.086152934916	290.163620122931	218.15483064738	0.412239132012271	0.0207237637481565	0.375254792473295	Rcc1	4	132059230	132080916	-	3848	protein_coding	regulator of chromosome condensation 1 [Source:MGI Symbol;Acc:MGI:1913989]	-	458	207	282	227	201	231	206	250	228	249	265	253	4.79779336353978	2.37890800563063	2.68054847476074	2.4425931114633	2.73055310390657	2.72999788503277	2.07465141435671	2.45027627730009	2.02317963973686	2.11741140097222	2.38637342790943
ENSMUSG00000040855	402.803846537978	342.503267213464	278.849248962744	427.297061265069	288.585124836744	302.512529706385	219.821539061117	272.446669667139	285.526218164459	306.228340481311	285.94574305661	142.664541823424	340.425179753731	252.10550870901	0.433549673616404	0.0209287406426989	0.376917886955741	Reps2	X	161194950	161426645	-	8296	protein_coding	RALBP1 associated Eps domain containing protein 2 [Source:MGI Symbol;Acc:MGI:2663511]	-	389	311	303	406	212	262	219	284	330	365	321	164	1.89013133800172	1.65780716145278	1.33592939383606	2.02636476095999	1.33584709582061	1.43620998579653	1.02302995635713	1.29109948152093	1.35825045346492	1.43967705968207	1.3407996348052
ENSMUSG00000034858	1713.7284473531	2265.36726899709	2576.82474289004	2398.54680449038	3381.34646270977	4239.7939277933	1284.80168948963	1334.41308981335	2545.50949648436	2043.75955455472	1300.56319271854	2765.43035644308	2762.60127570561	1879.07956325061	0.555743853362681	0.0209309866216242	0.376917886955741	Fam214a	9	74860166	74939750	+	6637	protein_coding	family with sequence similarity 214, member A [Source:MGI Symbol;Acc:MGI:2387648]	-	1655	2057	2800	2279	2484	3672	1280	1391	2942	2436	1460	3179	10.0516487785826	13.7058141902891	15.4310626364247	14.2178144347259	19.5645294441457	25.1603251324352	7.47396623396137	7.90433653339495	15.1358046176586	12.0100946421289	7.62269656264874
ENSMUSG00000013663	2571.11041376298	3128.78386544518	3333.30686383847	2974.2401358007	3005.64130018646	3244.50461249977	2784.40616144081	2524.92829071799	2715.9599964189	2461.57246841689	2509.3743245809	2935.93188203692	3042.93119858893	2655.36218726874	0.196622749556879	0.0210178581689007	0.377245369334397	Pten	19	32734897	32803560	+	11507	protein_coding	phosphatase and tensin homolog [Source:MGI Symbol;Acc:MGI:109583]	-	2483	2841	3622	2826	2208	2810	2774	2632	3139	2934	2817	3375	8.69812673481518	10.9182110843259	11.5131974625513	10.1688157546568	10.0305925414131	11.1052822472123	9.3423755882411	8.62648520685271	9.3145926054879	8.34332113337025	8.48305588094121
ENSMUSG00000041064	70.4130117341453	39.646680449147	14.7247128165145	38.9408651891812	61.2562764983654	11.5462797597857	19.0712750783617	20.145704447218	26.8221598881764	21.8135256233263	19.5975275615122	13.9184918852121	39.4213044078565	20.2281140806344	0.957775643142068	0.0210612617586021	0.377359461571695	Pif1	9	65494442	65503249	+	4388	protein_coding	PIF1 5'-to-3' DNA helicase [Source:MGI Symbol;Acc:MGI:2143057]	-	68	36	16	37	45	10	19	21	31	26	22	16	0.624673983172285	0.362809163555415	0.133371484201004	0.349136649048565	0.536087311247388	0.103637940759392	0.167803092952589	0.180494006760315	0.241229122552066	0.193886554279532	0.17373353478019
ENSMUSG00000024736	876.020704810102	689.4117211435	577.024683497163	719.87977809189	436.961439021673	614.262083220598	490.834395437836	610.127048972888	528.656119086316	510.93988863868	502.409342940585	386.238149814635	652.260068297488	504.867490815157	0.370662410323621	0.0210700190960709	0.377359461571695	Tmem132a	19	10835186	10847304	-	4548	protein_coding	transmembrane protein 132A [Source:MGI Symbol;Acc:MGI:2147810]	-	846	626	627	684	321	532	489	636	611	609	564	444	7.49826926083653	6.08690106555022	5.04262537882863	6.22724539067466	3.68955687522176	5.31957051705754	4.16678778696645	5.27408068704685	4.58728176257854	4.38165117303261	4.29720667773175
ENSMUSG00000031217	1365.80533054908	1244.46524743156	1359.2750518745	1177.69805801875	1170.67550641321	1122.29839265117	966.612521076966	1126.24081052543	1039.1423879258	1194.71001875448	998.58310892978	1130.87746567348	1240.03626448971	1076.02771881432	0.205087860151531	0.0210983680750166	0.377456906375731	Efnb1	X	98179736	98192597	+	3452	protein_coding	ephrin B1 [Source:MGI Symbol;Acc:MGI:102708]	-	1319	1130	1477	1119	860	972	963	1174	1201	1424	1121	1300	15.4022842211379	14.4760482565639	15.6501797026996	13.4220741468486	13.0231876188235	12.8050380098132	10.8110650258668	12.8264779803819	11.8797385442747	13.4983338650315	11.2528471431574
ENSMUSG00000047534	182.245442135435	37.444087090861	31.2900147350934	76.8292745624385	85.7587870977116	42.721235111207	23.0862803580168	63.315071119828	59.7009365252959	21.8135256233263	38.3042584156829	18.2680205993409	76.0481401221244	37.4146821069151	1.0235122248029	0.0212330199689179	0.378632543320194	Mis18bp1	12	65179508	65219378	-	7990	protein_coding	MIS18 binding protein 1 [Source:MGI Symbol;Acc:MGI:2145099]	MYB	176	34	34	73	63	37	23	66	69	26	43	21	0.887926491047923	0.188180450316922	0.155647359753725	0.378300064167481	0.412176667140795	0.210591257946582	0.111556283203657	0.311535301924079	0.294874334423409	0.106479874865906	0.186487303882497
ENSMUSG00000033685	10331.0385010525	9094.50797636265	8173.13590771659	9725.74419495198	5813.9012649893	9500.27898635165	5309.84448234387	7482.6902232524	8095.96613140861	7856.22515141643	6276.55359992795	6613.89336270422	8773.10113857077	6939.19549184225	0.338360802189359	0.0213396560108989	0.379793280802546	Ucp2	7	100142544	100151227	+	6989	protein_coding	uncoupling protein 2 (mitochondrial, proton carrier) [Source:MGI Symbol;Acc:MGI:109354]	-	9977	8258	8881	9241	4271	8228	5290	7800	9357	9364	7046	7603	57.5434712205781	52.2519140504405	46.4789651543304	54.7474964275443	31.9450935311342	53.5383073570125	29.3328060728802	42.0910415209018	45.7147396968046	43.8416941483446	34.9345531343841
ENSMUSG00000039782	802.501236675921	974.647561041529	977.352813196151	1188.22261617799	895.702887464988	1226.21491048924	1034.8676108311	742.513106768892	789.955870255002	795.354703496665	735.798080264049	830.759984398596	1010.77367084097	821.541559335718	0.299422124016001	0.0213792132359599	0.38000571358027	Cpeb2	5	43390513	43447067	+	7816	protein_coding	cytoplasmic polyadenylation element binding protein 2 [Source:MGI Symbol;Acc:MGI:2442640]	-	775	885	1062	1129	658	1062	1031	774	913	948	826	955	3.99694596034904	5.00727087444497	4.96992215631232	5.98094385215476	4.40079335299052	6.17910194042285	5.11195584633489	3.73479286133535	3.98860371136742	3.96885059133779	3.66204005773926
ENSMUSG00000112794	10.3548546667861	14.3168568288586	23.0073637758039	8.41964652739052	5.44500235541026	16.1647916636999	4.0150052796551	5.755915556348	1.73046192826945	6.71185403794654	3.56318682936585	11.3087746567348	12.9514193029916	5.51419971471996	1.2396924728404	0.0214328160694916	1	Gm48878	10	122290037	122292714	+	2678	TEC	predicted gene, 48878 [Source:MGI Symbol;Acc:MGI:6098630]	-	10	13	25	8	4	14	4	6	2	8	4	13	0.150522198203224	0.214671872934353	0.34145938706241	0.123691469311515	0.0780798646337578	0.23774032773454	0.0578845149071154	0.0844988479317466	0.0255008164436259	0.0977508129118846	0.0517579435545845
ENSMUSG00000036526	75.5904390675383	60.5713173528634	48.7756112047044	13.6819256070096	107.538796519353	70.4323065346926	30.1125395974133	33.5761740786967	38.0701624219278	52.855850548829	30.2870880496098	22.6175493134696	62.7650660476935	34.5865606683244	0.85336367475224	0.0214371114738131	0.380214516419827	Card11	5	140858745	140986337	-	4866	protein_coding	caspase recruitment domain family, member 11 [Source:MGI Symbol;Acc:MGI:1916978]	-	73	55	53	13	79	61	30	35	44	63	34	26	0.604730509978238	0.49984223599388	0.398394547006297	0.110619472169418	0.848681274231764	0.570089608039149	0.238925294268272	0.271272674908981	0.308755877844773	0.42365214369132	0.242122085724005
ENSMUSG00000085162	2.07097093335722	2.20259335828594	4.60147275516079	2.10491163184763	1.36125058885256	2.30925595195713	1.00375131991378	0	0	0	0	0.869905742825755	2.44174253657688	0.312276177123255	2.93239486133104	0.0214485821672682	1	Gm12295	11	65164428	65256757	-	7506	lncRNA	predicted gene 12295 [Source:MGI Symbol;Acc:MGI:3650535]	-	2	2	5	2	1	2	1	0	0	0	0	1	0.010740699354869	0.0117832149812088	0.024365260819428	0.0110326990013402	0.00696435776342936	0.0121173270464219	0.00516302727555472	0	0	0	0
ENSMUSG00000067869	84.9098082676458	88.1037343314377	73.6235640825726	82.0915536420576	167.433822428865	83.1332142704568	85.3188621926709	55.6405170446973	65.757553274239	73.8303944174119	42.7582419523902	68.7225536832347	96.5492828371727	65.3380204274407	0.556903887624088	0.021582434265975	0.381448995833564	Tcea1-ps1	15	90766818	90767721	+	904	processed_pseudogene	transcription elongation factor A (SII) 1, pseudogene 1 [Source:MGI Symbol;Acc:MGI:1861432]	-	82	80	80	78	123	72	85	58	76	88	48	79	3.65642396422955	3.91348724110413	3.23691411877215	3.57261737771938	7.11256607609845	3.62200845705302	3.64387503548304	2.41974540120771	2.87064721744374	3.18533567119281	1.83992618813067
ENSMUSG00000020275	174.997043868685	117.838744668298	158.290662777531	137.87171188602	179.685077728539	157.029404733085	133.498925548532	141.019931130526	110.749563409245	107.389664607145	132.728709393878	94.8197259680073	154.285440943693	120.034420009555	0.362717022583198	0.0216370193571569	0.381448995833564	Rel	11	23686847	23720970	-	7466	protein_coding	reticuloendotheliosis oncogene [Source:MGI Symbol;Acc:MGI:97897]	RHD	169	107	172	131	132	136	133	147	128	128	149	109	0.912451614079982	0.633779456632602	0.842655542625979	0.726513425544589	0.924220460372851	0.828392802452463	0.690361613063451	0.742573521517523	0.585405294924448	0.561000111391432	0.691553648306904
ENSMUSG00000038664	1441.39576961662	1350.18972862928	1295.77472785328	1410.29079333791	1608.99819602373	1326.66754439937	1272.75667365067	1037.02411940203	1167.19657061774	1313.00644617329	1332.63187418283	1170.89312984347	1405.55279331003	1215.58480231167	0.20870035314882	0.0216442884363811	0.381448995833564	Herc1	9	66257732	66416057	+	27464	protein_coding	HECT and RLD domain containing E3 ubiquitin protein ligase family member 1 [Source:MGI Symbol;Acc:MGI:2384589]	-	1392	1226	1408	1340	1182	1149	1268	1081	1349	1565	1496	1346	2.04308563184249	1.97409953178009	1.87520384486282	2.02023244726624	2.24979692681545	1.90257432775995	1.78923935705061	1.48447201097726	1.67719215158398	1.86462505220749	1.88753666770508
ENSMUSG00000028937	860.488422809923	702.627281293216	817.221561316556	744.086261858137	716.017809736449	692.77678558714	603.254543268179	581.347471191148	706.893697698069	749.210706985783	615.540524772951	606.324302749551	755.536353766904	643.76187444428	0.231265929452007	0.0217593578745979	0.383043738995459	Acot7	4	152262591	152356312	+	2124	protein_coding	acyl-CoA thioesterase 7 [Source:MGI Symbol;Acc:MGI:1917275]	-	831	638	888	707	526	600	601	606	817	893	691	697	15.7709420565453	13.2833780207232	15.2921332548999	13.7824122325259	12.9455606825943	12.8464204534523	10.9656136162517	10.7603951934477	13.1341570899804	13.7574489489982	11.2733016751261
[truncated: 420 more rows]
[truncated: 1 more columns]
