# Supplementary material for: Loss of CTRP10 results in female obesity with preserved metabolic health
Source: eLife. 2025 Mar 24;13:RP93373. doi: 10.7554/eLife.93373 (PMC11932693; doi:10.7554/eLife.93373)
Supplement: Figure 8—source data 4. [file elife-93373-fig8-data4.xls]

gene_id	KO_iWAT1	KO_iWAT2	KO_iWAT3	KO_iWAT4	KO_iWAT5	KO_iWAT6	WT_iWAT1	WT_iWAT2	WT_iWAT3	WT_iWAT4	WT_iWAT5	WT_iWAT6	KO_iWAT	WT_iWAT	log2FoldChange	pvalue	padj	gene_name	gene_chr	gene_start	gene_end	gene_strand	gene_length	gene_biotype	gene_description	tf_family	KO_iWAT1_count	KO_iWAT2_count	KO_iWAT3_count	KO_iWAT4_count	KO_iWAT5_count	KO_iWAT6_count	WT_iWAT1_count	WT_iWAT2_count	WT_iWAT3_count	WT_iWAT4_count	WT_iWAT5_count	WT_iWAT6_count	KO_iWAT1_fpkm	KO_iWAT2_fpkm	KO_iWAT3_fpkm	KO_iWAT4_fpkm	KO_iWAT5_fpkm	KO_iWAT6_fpkm	WT_iWAT1_fpkm	WT_iWAT2_fpkm	WT_iWAT3_fpkm	WT_iWAT4_fpkm	WT_iWAT5_fpkm
ENSMUSG00000101089	290.971416136689	341.401970534321	381.922238678345	284.16307029943	251.831358937725	439.913258847834	605.262045908006	713.733528987152	649.788454065177	646.015951152354	683.241074530902	667.217704747354	331.700552239057	660.876459898491	-0.993025353921669	1.42685439216227e-13	2.35102798196577e-09	2610016A17Rik	19	25648496	25649617	-	1099	lncRNA	RIKEN cDNA 2610016A17 gene [Source:MGI Symbol;Acc:MGI:1919653]	-	281	310	415	270	185	381	603	744	751	770	767	767	10.3067027795718	12.4740180214629	13.8121098816943	10.1724697225187	8.79961495348103	15.7656789102723	21.2633946190893	25.5320304189181	23.3333398605362	22.9263013276934	24.183840256517
ENSMUSG00000001288	836.672257076315	892.050310105806	933.178674746608	879.85306211231	871.200376865641	1061.1031099243	1209.5203404961	1254.78959128386	1248.52828124641	1198.9049275282	1293.4368190598	1267.45266729713	912.342965138497	1245.43877115192	-0.449043166312907	5.46267093572942e-09	1.28583470011448e-05	Rarg	15	102143373	102165952	-	4261	protein_coding	retinoic acid receptor, gamma [Source:MGI Symbol;Acc:MGI:97858]	THR-like	808	810	1014	836	640	919	1205	1308	1443	1429	1452	1457	7.64382879617208	8.40651225482894	8.70434389948723	8.12372245442312	7.85159830985039	9.80820131527771	10.9594432504173	11.577274212144	11.5635041102079	10.9739166686693	11.8081721522228
ENSMUSG00000073680	70.4130117341453	79.2933608982939	55.2176730619295	85.248921089829	88.4812882754167	94.6794940302425	191.716502103531	188.985894100093	136.706492333286	127.525226720984	155.889423784756	120.91689825278	78.8889581816428	153.623406215905	-0.965124069686544	2.49787430352247e-07	0.000316595960762614	Tmem88b	4	155866048	155870331	-	3471	protein_coding	transmembrane protein 88B [Source:MGI Symbol;Acc:MGI:2444329]	-	68	72	60	81	65	82	191	197	158	152	175	139	0.789705974693168	0.917318703359931	0.63227535941444	0.966252742009338	0.978922647421364	1.07434714181162	2.13251322428405	2.14053198924229	1.55430819027553	1.43294637354725	1.74707290743705
ENSMUSG00000061780	10257.5190329183	20901.5096734544	22453.3464560826	14608.0867250226	32066.9801215999	31717.6305001312	44215.2456422018	44699.4808913392	40108.6465734292	47315.2150405041	52778.8141132744	57052.7681432271	22000.8454182015	47695.0284006626	-1.11630911307709	8.57455415707358e-07	0.00080019828756072	Cfd	10	79726687	79728489	+	922	protein_coding	complement factor D (adipsin) [Source:MGI Symbol;Acc:MGI:87931]	-	9906	18979	24398	13880	23557	27470	44050	46595	46356	56396	59249	65585	433.09037026944	910.300477378246	967.905430117976	623.331219746392	1335.60702278014	1354.91837450263	1851.51813912182	1905.9807281813	1716.76043298732	2001.51267283796	2226.78197748059
ENSMUSG00000022203	472.181372805445	348.009750609179	416.893431617567	360.992344861869	280.417621303628	356.780044577377	614.29580778723	666.726885276977	602.200751037767	410.262078069482	706.401788921781	584.576659178907	372.545760962511	597.410661712024	-0.679062343315649	1.01872861856319e-05	0.00541470691873088	Efs	14	55153992	55163583	-	2917	protein_coding	embryonal Fyn-associated substrate [Source:MGI Symbol;Acc:MGI:105311]	-	456	316	453	343	206	309	612	695	696	489	793	672	6.30143612394359	4.79063429569237	5.6803015709917	4.86875616652253	3.69164919118751	4.81734161028912	8.13070066196504	8.98583594783717	8.14718302356479	5.48546430589026	9.42029172621422
ENSMUSG00000113204	347.923116804012	377.744760946039	352.472813045316	354.677609966326	362.092656634782	333.687485057806	462.72935848025	457.595286729666	417.041324712937	464.795892127798	452.524727329463	449.741269040915	354.766407075714	450.737976403505	-0.345460769042927	1.83446376489579e-05	0.00889013513358468	Gm46430	13	74727467	74766064	-	8308	lncRNA	predicted gene, 46430 [Source:MGI Symbol;Acc:MGI:5826067]	-	336	343	383	337	266	289	461	477	482	554	508	517	1.63024889408819	1.82574448697587	1.68621095505946	1.67955313211772	1.6736890771584	1.58192813061013	2.15039091702872	2.16536942988888	1.98100336195032	2.1819974579596	2.11882368206253
ENSMUSG00000048138	854.275510009851	1026.40850496125	1029.80960260498	459.923191558707	976.016672207289	1096.89657717964	2029.58516886565	1527.236260951	1487.33202734759	1642.72627578742	1585.6181390678	1200.46992509954	907.221676420287	1578.8279661865	-0.799400984034947	1.9167029295715e-05	0.00902328976301416	Dmrt2	19	25649775	25656355	+	2337	protein_coding	doublesex and mab-3 related transcription factor 2 [Source:MGI Symbol;Acc:MGI:1330307]	DM	825	932	1119	437	717	950	2022	1592	1719	1958	1780	1380	14.2300478647964	17.6359787027866	17.513824543277	7.74253288696492	16.0379950962515	18.486312359846	33.530143979758	25.6917957709213	25.1160781950226	27.4154222038392	26.3930076651407
ENSMUSG00000050737	680.313951607845	651.967634052639	727.952989866437	733.561703698899	492.772713164628	849.806190320225	1339.00426076498	1458.16527427483	1154.21810615572	878.413897216253	1067.17445539507	798.573471914043	689.395863785112	1115.92491095348	-0.693879612646915	3.20899642596916e-05	0.0125891985977843	Ptges	2	30779483	30819875	-	3931	protein_coding	prostaglandin E synthase [Source:MGI Symbol;Acc:MGI:1927593]	-	657	592	791	697	362	736	1334	1520	1334	1047	1198	918	6.7371070857255	6.6597975701069	7.36008890048872	7.34158900747005	4.81387888902897	8.51451989474506	13.1512115904957	14.583126873444	11.5874386550069	8.71534535728804	10.5604243106928
ENSMUSG00000048772	86.980779201003	151.97894172173	114.116524327988	92.6161118012957	123.873803585583	131.627589261557	217.814036421289	194.741809656441	208.520662356468	177.864132005583	150.544643540707	178.33067727928	116.865624983193	187.969326876628	-0.687530460495698	3.42523448319273e-05	0.0128267246771742	Tmem53	4	117109148	117125779	+	1713	protein_coding	transmembrane protein 53 [Source:MGI Symbol;Acc:MGI:1916027]	-	84	138	124	88	91	114	217	203	241	212	169	205	1.97666488792829	3.5625756005708	2.6477315021737	2.12708891008676	2.77698582187938	3.02644567320212	4.90925227815416	4.46939547543561	4.80390424141368	4.04966838290585	3.41866806915075
ENSMUSG00000085207	47.6323314672159	31.9376036951462	57.0582621639938	23.1540279503239	29.9475129547564	58.8860267749069	116.435153109998	86.33873334522	57.9704745970265	92.2879930217649	84.625687197439	88.730385768227	41.4359608343905	87.7314045066126	-1.0752389924188	3.77051468716385e-05	0.0138059490000886	Gm11767	11	119822920	119833544	-	2852	lncRNA	predicted gene 11767 [Source:MGI Symbol;Acc:MGI:3650674]	-	46	29	62	22	22	51	116	90	67	110	95	102	0.650158785142312	0.449666819393347	0.795154990046203	0.31939895713347	0.40323924480737	0.813216251285514	1.57623674499172	1.19015382938929	0.802158045444253	1.26207198753432	1.15425477031222
ENSMUSG00000118669	489.784625738981	508.799065764053	567.821737986841	439.926531056155	447.851443732494	541.520520733948	795.974796691624	761.699491956719	690.454309379509	522.685633205087	846.25687197439	694.184782774953	499.283987502079	718.542647663714	-0.523940196778974	3.90726806254531e-05	0.0139453533181881	Arvcf	16	18166046	18225826	+	6715	protein_coding	armadillo repeat gene deleted in velocardiofacial syndrome [Source:MGI Symbol;Acc:MGI:109620]	-	473	462	617	418	329	469	793	794	798	623	950	798	2.83939784558205	3.04255420564531	3.36084719694584	2.57745207582255	2.56117653365405	3.17623202115395	4.5765704251882	4.45948385009696	4.05780839731586	3.03586875944361	4.902359798854
ENSMUSG00000090386	155.322820001791	149.776348363444	161.97184098166	147.343814229334	161.988820073455	151.256264853192	254.952835258099	214.887514103659	199.868352715121	219.813219742749	219.135990006	187.029734707537	154.609984750479	215.947941088861	-0.480858627080814	3.97785765585264e-05	0.0139453533181881	Mir99ahg	16	77033184	77570315	+	22436	lncRNA	Mir99a and Mirlet7c-1 host gene (non-protein coding) [Source:MGI Symbol;Acc:MGI:1919929]	-	150	136	176	140	119	131	254	224	231	262	246	215	0.269498872429288	0.268062363706937	0.286930593662598	0.258370507634345	0.277262518064887	0.265528571094847	0.438733972789254	0.376541368830694	0.35156142063476	0.382117408229202	0.379941969585015
ENSMUSG00000032733	517.742733339304	528.622405988626	681.938262314829	604.10963834027	485.966460220366	636.20001476419	788.948537452227	775.129961588197	893.783585951169	682.93114836106	753.614014410878	876.864988768361	575.763252494597	795.212039421982	-0.46446879176776	4.18969386179244e-05	0.0143819970334904	Snx33	9	56824477	56835655	-	4571	protein_coding	sorting nexin 33 [Source:MGI Symbol;Acc:MGI:2443239]	-	500	480	741	574	357	551	786	808	1033	814	846	1008	4.40930263386823	4.64378796669193	5.92947998046705	5.1994930886163	4.08269209492702	5.48183262990088	6.66383605907386	6.66668982451191	7.71656044502506	5.82712248578303	6.4133764943089
ENSMUSG00000015134	673.065553341095	549.547042892343	743.597997233983	674.624178007166	582.615252028898	944.485684350468	660.468368503264	1352.64015574178	1123.93502241101	1470.73501606504	1154.47253271454	1223.08747441301	694.655951308992	1164.22309497477	-0.744993299112037	4.56675962471872e-05	0.0148243009907147	Aldh1a3	7	66040638	66077265	-	4617	protein_coding	aldehyde dehydrogenase family 1, subfamily A3 [Source:MGI Symbol;Acc:MGI:1861722]	-	650	499	808	641	428	818	658	1410	1299	1753	1296	1406	5.67498354802581	4.77950628252412	6.40119572667041	5.74855232935913	4.84588973171859	8.05710128556877	5.52305030031329	11.5177950983076	9.60691479103348	12.4240446919667	9.72686125187208
ENSMUSG00000047905	45.5613605338587	49.5583505614337	53.3770839598651	25.2589395821716	55.8112741429552	53.1128868950141	70.2625923939643	88.2573718640027	83.9274035210682	103.194755833428	88.1888740268049	74.8118938830149	47.1133159458831	84.7738152537138	-0.852457684731048	4.76831837002545e-05	0.0151091503428672	Gm8566	6	67182603	67183067	+	465	processed_pseudogene	predicted pseudogene 8566 [Source:MGI Symbol;Acc:MGI:3647296]	-	44	45	58	24	41	46	70	92	97	123	99	86	3.8142648728349	4.27958766043323	4.56230863106079	2.13706938591121	4.60914676185878	4.49873356266705	5.83388772284293	7.46182371255628	7.12284417666121	8.65551915814444	7.37751048982717
ENSMUSG00000010660	509.458849605875	670.689677598069	655.249720334896	511.493526538974	552.667739074141	707.786949274862	990.702552754896	868.183929749157	834.947880390008	699.710783455927	849.820058803756	817.71139825621	601.22441040447	843.512767234992	-0.487878622292592	5.16192825800209e-05	0.0160477531900189	Plcd1	9	118900595	118922570	-	3093	protein_coding	phospholipase C, delta 1 [Source:MGI Symbol;Acc:MGI:97614]	-	492	609	712	486	406	613	987	905	965	834	954	940	6.41204124861981	8.70722442518794	8.41995351891149	6.50603931622582	6.86176351928682	9.01292897264812	12.3665971079275	11.0351634259566	10.6532484498495	8.82321971385688	10.6879902431761
ENSMUSG00000049892	715.520457474918	1405.25456258643	870.598645276421	891.430076087472	755.494076813173	1016.07261886114	1957.31507383186	1446.65344316213	1802.27609829263	1716.55667020483	2719.60234751349	916.01074719552	942.395072849926	1759.73573003341	-0.900881074651683	5.36870158993711e-05	0.0160836538358898	Rasd1	11	59854007	59855770	-	1611	protein_coding	RAS, dexamethasone-induced 1 [Source:MGI Symbol;Acc:MGI:1270848]	-	691	1276	946	847	555	880	1950	1508	2083	2046	3053	1053	17.2899457933376	35.0265610378847	21.4785627230606	21.7694874557227	18.0088954075897	24.8411973908099	46.9085545152774	35.3033494165028	44.1497645394944	41.5576568200685	65.668766368406
ENSMUSG00000009633	1943.60622095575	3088.03588831689	2695.54273997319	2114.38373419094	2059.57214093393	2379.68825849183	3135.71912341063	4016.66973907151	3909.11349596068	3282.9356063106	3149.85715715941	3088.16538703143	2380.13816381042	3430.41008482405	-0.527159507478383	5.68185250935814e-05	0.016657736949464	G0s2	1	192954469	192955525	-	871	protein_coding	G0/G1 switch gene 2 [Source:MGI Symbol;Acc:MGI:1316737]	-	1877	2804	2929	2009	1513	2061	3124	4187	4518	3913	3536	3550	86.8674838830671	142.364668119211	123.001621617549	95.5041219038207	90.8051345123894	107.608166295248	138.997135303674	181.298794317876	177.118013959807	147.00518613878	140.67654556812
ENSMUSG00000085078	0	0	3.68117820412863	0	1.36125058885256	4.61851190391427	12.0450158389653	15.3491081502613	14.7089263902903	9.22879930217649	8.90796707341463	10.4388689139091	1.61015678281591	11.7797809448362	-2.8585214430706	7.48184472610657e-05	1	C030013C21Rik	11	80398236	80399932	-	795	lncRNA	RIKEN cDNA C030013C21 gene [Source:MGI Symbol;Acc:MGI:1924667]	-	0	0	4	0	1	4	12	16	17	11	10	12	0	0	0.184035871910065	0	0.0657540495249067	0.228811715246396	0.584961248759453	0.759037030645593	0.730157339253152	0.452758403578349	0.435873499494268
ENSMUSG00000014554	489.784625738981	466.94979195662	524.56789408833	495.706689300117	473.715204920693	556.530684421669	603.254543268179	666.726885276977	610.853060679115	609.100753943649	648.500002944585	602.844679778248	501.209148404402	623.546654315125	-0.314214373985743	8.83488374058169e-05	0.0231067268878674	Dguok	6	83457199	83483951	-	4611	protein_coding	deoxyguanosine kinase [Source:MGI Symbol;Acc:MGI:1351602]	-	473	424	570	471	348	482	601	695	706	726	728	693	4.13501551357264	4.06642812179096	4.52157099089383	4.22947165794969	3.9452429714944	4.75376063572254	5.05117400150045	5.68459845149448	5.22810427497693	5.15207838554673	5.47096392468667
ENSMUSG00000021708	792.146382009135	940.507363988097	939.620736603833	891.430076087472	661.567786182346	800.157187353147	1250.67414461256	1017.8377342142	1022.70299960724	1135.98129592245	1083.20879612722	1228.30690886997	837.571588704005	1123.11864655894	-0.421840418354808	9.52629024030828e-05	0.0241484129676246	Rasgrf2	13	92028519	92268164	-	8327	protein_coding	RAS protein-specific guanine nucleotide-releasing factor 2 [Source:MGI Symbol;Acc:MGI:109137]	-	765	854	1021	847	486	693	1246	1061	1182	1354	1216	1412	3.70325821776148	4.5353590217489	4.48483838867659	4.21167819036498	3.05096578779131	3.78468783293123	5.79885777374456	4.80548171733821	4.84689458192552	5.32072806275142	5.06025734875824
ENSMUSG00000052713	252.65845386958	200.435995604021	238.356288717329	258.904130717259	227.328848338378	232.080223171692	343.282951410511	317.534674858531	279.469601415516	286.931760122215	337.611952082415	326.214653559658	234.960656736376	315.174265574808	-0.421673781393315	9.75889174040092e-05	0.024363221091907	Zfp608	18	55021120	55125627	-	8513	protein_coding	zinc finger protein 608 [Source:MGI Symbol;Acc:MGI:2442338]	-	244	182	259	246	167	201	342	331	323	342	379	375	1.15536263381098	0.94543379067952	1.11282468594038	1.19650028904021	1.02547120699803	1.0737392234758	1.55688470501202	1.46641019198017	1.29555111117337	1.3145721767662	1.54270955908752
ENSMUSG00000053886	149.109907201719	174.004875304589	183.138615655399	141.029079333791	208.271340094442	163.957172588957	352.316713289735	351.110848937228	234.47759128051	171.99125972238	244.969094518902	347.962297130302	169.91849836315	283.80463414651	-0.740491545801091	0.000114357814147333	0.0273083145464582	Sh2d4a	8	68729219	68800351	+	2723	protein_coding	SH2 domain containing 4A [Source:MGI Symbol;Acc:MGI:1919531]	-	144	158	199	134	153	142	351	366	271	205	275	400	2.13169946153161	2.56597139929024	2.6730990741399	2.03759324023944	2.93719934409182	2.37151620769057	4.99542513343376	5.06924818231152	3.39825771651931	2.4634694629313	3.49955357425392
ENSMUSG00000031880	102.513061201182	83.6985476148658	105.833873368698	84.1964652739052	38.1150164878718	77.360074390564	156.585205906549	159.246997058961	160.067728364924	155.211624627514	137.182692930585	103.518783396265	81.9528397228479	145.302172047466	-0.817153891950284	0.000143997195182924	0.0325019422606718	Rrad	8	105354702	105357959	-	1577	protein_coding	Ras-related associated with diabetes [Source:MGI Symbol;Acc:MGI:1930943]	-	99	76	115	80	28	67	156	166	185	185	154	119	2.53054827089633	2.13120028069767	2.66732396787851	2.10048037296283	0.928145302742183	1.9320951193087	3.83359195049394	3.96996341686347	4.00566565969105	3.83867194363784	3.3838929957567
ENSMUSG00000002031	582.978317740056	618.92873367835	656.170014885928	616.739108131356	551.306488485289	661.601830235719	725.712204297659	719.4894445435	785.629715434329	720.68532732451	807.061816851366	781.175357057528	614.62074885945	756.625644251482	-0.298866527050058	0.000190027660626922	0.0388515081698217	Ift46	9	44679205	44704744	+	6416	protein_coding	intraflagellar transport 46 [Source:MGI Symbol;Acc:MGI:1923818]	-	563	562	713	586	405	573	723	750	908	859	906	898	3.53716373974089	3.87359602140834	4.06475894070065	3.78175678620472	3.29974440395602	4.06139902995508	4.36703750218467	4.40866417474317	4.83232522474403	4.38096488318511	4.89318275375212
ENSMUSG00000021253	766.259245342169	730.15969827179	859.555110664035	1006.14776002317	706.489055614481	1004.52633910135	1300.86171060825	1434.18229279004	955.214984404734	1122.55758784656	1332.63187418283	1056.93547753329	845.522868169499	1200.39732122762	-0.50492932789066	0.000194524392994115	0.0388515081698217	Tgfb3	12	86103519	86125815	-	3383	protein_coding	transforming growth factor, beta 3 [Source:MGI Symbol;Acc:MGI:98727]	-	740	663	934	956	519	870	1296	1495	1104	1338	1496	1215	8.81740616681326	8.66670264901805	10.0984448691531	11.7008181201716	8.01964221230391	11.695065241662	14.8462231210425	16.6666879775357	11.1429899239399	12.9418117719702	15.3234723741804
ENSMUSG00000102059	97.3356338677891	176.207468662875	177.616848349206	122.084874647163	161.988820073455	165.111800564935	249.93407865853	229.277302994529	218.03820296195	218.974237988006	193.302885493098	274.890214732939	150.057574360904	230.736153804842	-0.621384853542654	0.00019652460058402	0.0388515081698217	Gm20257	1	58691751	58694992	+	1073	transcribed_unprocessed_pseudogene	predicted gene, 20257 [Source:MGI Symbol;Acc:MGI:5012442]	-	94	160	193	116	119	143	249	239	252	261	217	316	3.53133774446355	6.59420776506642	6.57911090552674	4.47629398400322	5.79744814101006	6.06068495987571	8.99316588988641	8.40056098600978	8.01928191140708	7.95942598919677	7.00789531829018
ENSMUSG00000032492	488.749140272303	491.178318897765	457.386391862982	414.667591473983	364.815157812487	549.602916565798	606.26579722792	707.977613430804	528.656119086316	745.854779966809	585.253436723341	649.819589890839	461.066586147553	637.304556054338	-0.466145266647888	0.000197889198916388	0.0388515081698217	Pth1r	9	110551153	110576213	-	2925	protein_coding	parathyroid hormone 1 receptor [Source:MGI Symbol;Acc:MGI:97801]	-	472	446	497	394	268	476	604	738	611	889	657	747	6.50469972253149	6.74297196503132	6.21498577177309	5.57738578622213	4.789592407445	7.40059224645652	8.00246986978103	9.51569692842043	7.13263502776315	9.94527631766949	7.78335955173841
ENSMUSG00000004947	834.601286142958	998.876087982675	870.598645276421	841.964652739052	703.766554436776	755.126696289983	1185.43030881817	1106.09510607821	1147.29625844264	1086.4813723926	1068.95604880976	925.579710366603	834.155653811311	1086.639800818	-0.380305059766247	0.000225590174009808	0.042559054819912	Dtx2	5	136023654	136061726	+	7032	protein_coding	deltex 2, E3 ubiquitin ligase [Source:MGI Symbol;Acc:MGI:1921448]	-	806	907	946	800	517	654	1181	1153	1326	1295	1200	1064	4.62026945550791	5.7038853928897	4.92064342247591	4.71054827668143	3.84327370100676	4.22945375099754	6.50854654500861	6.18387290765273	6.43871680988168	6.02603805259075	5.91330088904339
ENSMUSG00000039001	1897.00937495521	1528.59979065044	1369.39829193585	1641.83107284115	1429.31311829519	1307.03886880774	1582.91583150402	2090.35666621372	2237.48727325239	2745.14830152013	2323.19781274654	2021.66094632705	1528.8650862476	2166.79447192731	-0.503146823713008	0.000227298465992126	0.042559054819912	Rps21	2	179899170	179900238	+	810	protein_coding	ribosomal protein S21 [Source:MGI Symbol;Acc:MGI:1913731]	-	1832	1388	1488	1560	1050	1132	1577	2179	2586	3272	2608	2324	91.1699203106227	75.7786410918193	67.1935416773858	79.744348381687	67.7632010381677	63.5545725366796	75.4500711922281	101.457071247879	109.012967977515	132.181062819769	111.570701100177
ENSMUSG00000078606	76.6259245342169	64.9765040694353	55.2176730619295	48.4129675324955	88.4812882754167	65.8137946307783	168.630221745514	125.670822980265	101.232022803763	97.3218835502248	84.625687197439	110.478029338871	66.588025350712	114.659777936013	-0.78758568564821	0.000238698440017192	0.0436697377125453	Gvin2	7	105544346	105603174	-	9275	protein_coding	GTPase, very large interferon inducible, family member 2 [Source:MGI Symbol;Acc:MGI:3782245]	-	74	59	60	46	65	57	168	131	117	116	95	127	0.321609542450989	0.281306948101792	0.236617549598654	0.205354511072061	0.366343990210194	0.279477166479527	0.701953498511343	0.532681344720925	0.430731472399759	0.409246557000689	0.354925563873904
ENSMUSG00000050014	152.216363601755	120.041338026584	122.399175287277	64.1998047713527	127.957555352141	83.1332142704568	328.226681611805	258.056880776269	174.776654755214	141.787916551621	200.429259151829	155.71312796581	111.657908551594	209.831753468758	-0.908793139825378	0.000246169500067904	0.0436697377125453	Apol10b	15	77468019	77480325	-	2325	protein_coding	apolipoprotein L 10B [Source:MGI Symbol;Acc:MGI:3043522]	-	147	109	133	61	94	72	327	269	202	169	225	179	2.54862243775786	2.07322246660988	2.09236913079685	1.08634360450487	2.11346241763281	1.40829920222621	5.45051795819897	4.36354473625574	2.96662788388776	2.37850851662831	3.35341385901235
ENSMUSG00000011263	149.109907201719	154.181535080016	127.000648042438	178.917488707049	159.26631889575	160.493288661021	278.039115616116	478.700310436275	231.016667423971	199.67765762891	341.17513891178	155.71312796581	154.828197764665	280.720336330477	-0.858331510446591	0.000248495503704629	0.0436697377125453	Exoc3l2	7	19197256	19230687	+	4016	protein_coding	exocyst complex component 3-like 2 [Source:MGI Symbol;Acc:MGI:1921713]	-	144	140	138	170	117	139	277	499	267	238	383	179	1.44537291677056	1.54161773292498	1.25688343546148	1.75273214388572	1.52293648320697	1.5740063865353	2.67300052696636	4.68615826136485	2.27013779611803	1.93920720619928	3.30470474336435
ENSMUSG00000041836	457.684576271944	474.65886871062	469.3502210264	422.03478218545	351.202651923962	487.253005862955	693.592162060419	624.516837863758	471.550875453424	560.439812168536	617.322118187634	642.860343948233	443.697350996889	601.713691613667	-0.437492606976588	0.000273341023539764	0.0464313406687082	Ptpre	7	135139210	135288022	+	10201	protein_coding	protein tyrosine phosphatase, receptor type, E [Source:MGI Symbol;Acc:MGI:97813]	-	442	431	510	401	258	422	691	651	545	668	693	739	1.74658870189588	1.86843024314768	1.82867719502832	1.62765351045622	1.32210695991115	1.88128718625658	2.62511467176226	2.40684626522813	1.82426706242704	2.1427656629414	2.35406299817542
ENSMUSG00000114538	32.1000494670368	16.5194501871446	27.6088365309647	9.47210234331434	12.2512552996731	42.721235111207	84.3151108727571	36.4541318568707	64.8923223101042	82.2202119648451	47.2122254890976	41.7554756556362	23.4454881565568	59.4749130248852	-1.33788934555939	0.000278227531548387	0.0467791330339059	Gm31517	14	7404532	7454574	+	4170	lncRNA	predicted gene, 31517 [Source:MGI Symbol;Acc:MGI:5590676]	-	31	15	30	9	9	37	84	38	75	98	53	48	0.299665512000845	0.159073402246319	0.263144816849823	0.0893648619108556	0.112822595767556	0.403506990645848	0.780649724063874	0.343682684289619	0.614129374424731	0.76900822373641	0.440420381323525
ENSMUSG00000070031	224.700346269258	225.765819224309	265.965125248294	186.284679418515	201.46508715018	252.863526739306	330.234184251632	312.738078561575	332.248690227734	295.321577669648	264.566622080415	301.857292760537	226.174097341644	306.16107425859	-0.434276147078587	0.000299819961377237	0.0484326814079679	Sp140	1	85528099	85572758	+	3328	protein_coding	Sp140 nuclear body protein [Source:MGI Symbol;Acc:MGI:3702467]	SAND	217	205	289	177	148	219	329	326	384	352	297	347	2.62837629065645	2.72403641647167	3.17631924208961	2.20216716505687	2.32470596968165	2.99258290887724	3.83111827472152	3.6944040570992	3.9398761405402	3.46098971966142	3.09243603765292
ENSMUSG00000058934	10.3548546667861	9.91167011228674	13.8044182654824	9.47210234331434	19.0575082439359	13.8555357117428	40.150052796551	31.657535559914	35.4744695295237	14.2626898306364	25.8331045129024	33.9263239702045	12.742681557258	30.2173626999553	-1.2546979258139	0.000305393548706076	0.0486722146845607	Igf1os	10	87662239	87699243	-	2607	lncRNA	insulin-like growth factor 1, opposite strand [Source:MGI Symbol;Acc:MGI:3841250]	-	10	9	15	9	14	12	40	33	41	17	29	39	0.154621575292763	0.152666533341116	0.210455290806245	0.142942644483417	0.280722121677105	0.20932717332668	0.594609631458592	0.477400664053202	0.537003959316693	0.213377613570505	0.385464654040673
ENSMUSG00000020889	1514.9152377508	2791.78708162743	2845.55075179143	1646.04089610485	3190.77138027041	2226.12273768668	5837.81767661852	4254.58091540056	3907.38303403241	2440.59792454831	3944.447820108	3683.18091512425	2369.19801420527	4011.33471430534	-0.759750176075096	0.000348220439930745	0.0524547077927904	Nr1d1	11	98658758	98666159	-	3077	protein_coding	nuclear receptor subfamily 1, group D, member 1 [Source:MGI Symbol;Acc:MGI:2444210]	THR-like	1463	2535	3092	1564	2344	1928	5816	4435	4516	2909	4428	4234	19.1658442525572	36.4328237780463	36.755438590917	21.0460009966118	39.8216952254381	28.4947550098364	73.2503798373431	54.35959819987	50.114234310223	30.9355034664072	49.8663648140946
ENSMUSG00000099423	0	0	0	0	0	0	3.01125395974133	3.83727703756533	0.865230964134723	5.0338905284599	10.6895604880976	4.34952871412878	0	4.6311236153546	-4.52263393281806	0.000348301906151402	1	Gm17826	7	16232657	16233454	+	798	processed_pseudogene	predicted gene, 17826 [Source:MGI Symbol;Acc:MGI:5010011]	-	0	0	0	0	0	0	3	4	1	6	12	5	0	0	0	0	0	0	0.145690536580127	0.189045876993498	0.0427889639323497	0.246030711445514	0.521081852778862
ENSMUSG00000002395	658.568756807594	721.349324838646	762.003888254627	714.617499012271	702.405303847924	726.260996890519	810.027315170417	942.05151272229	816.778030143179	915.329094424959	951.370883440683	812.491963799255	714.200961608597	874.67479995013	-0.292123577727711	0.000350186190277778	0.0524547077927904	Use1	8	71819492	71822376	+	2203	protein_coding	unconventional SNARE in the ER 1 homolog (S. cerevisiae) [Source:MGI Symbol;Acc:MGI:1914273]	-	636	655	828	679	516	629	807	982	944	1091	1068	934	11.6373405427742	13.1482867975634	13.7475548165591	12.7619080526683	12.2440427581059	12.9843897262298	14.1961969874549	16.8115246100405	14.6316114379511	16.2050813994001	16.799035564258
ENSMUSG00000046532	523.955646139375	601.307986812062	646.046774824575	685.148736166404	843.97536508859	656.983318331805	1059.96139382895	894.085549752723	821.104184963852	834.786845969601	925.537778927781	811.622058056429	659.569637893802	891.182968583222	-0.43528351933122	0.000357190710415784	0.0530219039236114	Ar	X	97192375	97366821	+	10048	protein_coding	androgen receptor [Source:MGI Symbol;Acc:MGI:88064]	ESR-like	506	546	702	651	620	569	1056	932	949	995	1039	933	2.02993445536272	2.40300891522336	2.55544834181648	2.68263567856005	3.22553453531315	2.57524192501701	4.07283926783552	3.49821418122105	3.2249370983177	3.24029400867258	3.58313783787582
ENSMUSG00000081189	159.464761868506	199.334698924878	199.703917573978	156.815916572648	262.721363648545	217.070059483971	417.56054908413	418.263197094621	477.607492202367	300.355468198108	198.647665737146	240.093985019908	199.185119678754	342.088059556047	-0.781684855234197	0.000367769830462858	0.0532577485189731	Hspd1-ps4	4	105993308	105994975	-	1668	processed_pseudogene	heat shock protein 1 (chaperonin), pseudogene 4 [Source:MGI Symbol;Acc:MGI:3649750]	-	154	181	217	149	193	188	416	436	552	358	223	276	3.72165232646211	4.79871430109729	4.75853543803429	3.6987123401993	6.0485447175384	5.12562934063645	9.66518705983844	9.85826647041275	11.2999804894151	7.02308530861314	4.63272382241255
ENSMUSG00000031980	155.322820001791	242.285269411454	103.072989715602	192.599414314058	525.44272729709	641.973154644083	1110.14895982464	1336.33172833213	785.629715434329	1130.10842363925	808.843410266049	539.341560551968	310.116062564013	951.733966341393	-1.61877039877329	0.000368476259705221	0.0532577485189731	Agt	8	125283273	125296445	-	1891	protein_coding	angiotensinogen (serpin peptidase inhibitor, clade A, member 8) [Source:MGI Symbol;Acc:MGI:87963]	-	150	220	112	183	386	556	1106	1393	908	1347	908	620	3.19750222201137	5.14485948248803	2.16638736579484	4.00700509858353	10.6705156941873	13.3711467970931	22.6660883657996	27.7823960217148	16.3956629518549	23.3086451539795	16.6387966337881
ENSMUSG00000059824	684.45589347456	1813.83563054847	1339.02857175179	1036.66897868496	1990.14836090245	1548.35611578726	2787.41741540055	2314.83737291129	2081.74569970814	1709.84481616688	2541.4430060452	3130.79076842989	1402.08225852491	2427.67984644366	-0.792374441725367	0.000376534929490097	0.0538138841442572	Dbp	7	45354512	45359627	+	2993	protein_coding	D site albumin promoter binding protein [Source:MGI Symbol;Acc:MGI:94866]	TF_bZIP	661	1647	1455	985	1462	1341	2777	2413	2406	2038	2853	3599	8.90237465175484	24.334882189413	17.7813977560282	13.626673425242	25.5346723094901	20.3754615407289	35.9568917280592	30.4060996947777	27.4488129911608	22.2811922686777	33.0310704903251
ENSMUSG00000026185	11097.2977463946	13398.3753984534	16707.0272794378	14222.8878963944	17353.2225066925	17392.1612021652	21216.2916490175	25313.5572975591	20132.1940734867	17025.4567490061	19320.489785529	21589.3207254496	15028.4953382563	20766.218380008	-0.466556531166327	0.00038854013029467	0.0538444446146245	Igfbp5	1	72897091	72914043	-	6006	protein_coding	insulin-like growth factor binding protein 5 [Source:MGI Symbol;Acc:MGI:96440]	-	10717	12166	18154	13514	12748	15063	21137	26387	23268	20293	21689	24818	71.9281727310939	89.5787194906066	110.559641975981	93.1663155716501	110.95486772529	114.054268193115	136.386378932841	165.697058685877	132.284326173289	110.560982890341	125.135863516022
ENSMUSG00000086432	60.0581570673592	138.763381572014	99.391811511473	81.0390978261338	72.1462812091859	120.081309501771	182.682740224307	200.497725212789	218.903433926085	98.1608653049682	156.780220492098	167.021902622545	95.2466731146562	170.674481297132	-0.840163848415519	0.000388874728964029	0.0538444446146245	B430119L08Rik	12	103862156	103865043	+	1994	lncRNA	RIKEN cDNA B430119L08 gene [Source:MGI Symbol;Acc:MGI:2441857]	-	58	126	108	77	53	104	182	209	253	117	176	192	1.17250300469998	2.79439475119562	1.98110832023547	1.59891694589082	1.38944176365694	2.3718847312653	3.53719671861439	3.95304030300021	4.33241478643822	1.92000195627063	3.05854664238906
ENSMUSG00000028268	591.262201473485	778.61675215408	734.395051723662	491.496866036422	737.79781915809	534.592752878077	1086.0589281467	944.929470500464	963.867294046082	852.405462819211	717.982146117219	921.230181652475	644.693573903969	914.412247213692	-0.504247414824242	0.000401079008007553	0.0548662512572995	Gbp3	3	142265787	142278970	+	3265	protein_coding	guanylate binding protein 3 [Source:MGI Symbol;Acc:MGI:1926263]	-	571	707	798	467	542	463	1082	985	1114	1016	806	1059	7.04959305102852	9.57587776964932	8.9398313551657	5.92234944483856	8.67772202137429	6.44886372178176	12.842721198836	11.3779273118836	11.6502881607561	10.1824312331422	8.55420098839026
ENSMUSG00000046056	86.980779201003	110.129667914297	192.341561165721	148.396270045258	145.653813007224	259.791294595178	196.7352587031	401.954769684969	260.434520204552	335.592701897327	261.89423195839	260.971722847727	157.215564321447	286.263867549344	-0.864847146793714	0.000438676195575973	0.0587647778415066	Sbsn	7	30450896	30455559	+	3625	protein_coding	suprabasin [Source:MGI Symbol;Acc:MGI:2446326]	-	84	100	209	141	107	225	196	419	301	400	294	300	0.934076400833424	1.21992843653729	2.10886071015288	1.61053970445137	1.54299813043757	2.82266865963442	2.09537153521145	4.35929362229656	2.83526167134415	3.61071278590382	2.81039208377366
ENSMUSG00000104388	2.07097093335722	9.91167011228674	6.4420618572251	4.20982326369526	5.44500235541026	3.4638839279357	33.1237935571546	18.2270659284353	10.3827715696167	15.1016715853797	13.361950610122	14.7883976280378	5.25723540831838	17.497608479791	-1.7282726762748	0.000467641479138687	0.0593091988312922	Gm37033	1	180185214	180192563	+	7350	TEC	predicted gene, 37033 [Source:MGI Symbol;Acc:MGI:5610261]	-	2	9	7	4	4	3	33	19	12	18	15	17	0.0109686652187274	0.0541498846830327	0.0348353614686908	0.0225337248174312	0.0284486908148576	0.0185617666960087	0.173996126544266	0.0974936594209327	0.0557479072947185	0.0801357174422532	0.0707182514485598
ENSMUSG00000024371	193.6357822689	298.451400047745	385.603416882474	227.330456239544	341.673897801994	423.748467184134	457.710601880682	502.683291921059	463.763796776212	475.702654939461	437.381183304659	523.683257181105	311.740570070798	476.820797667196	-0.613781468149696	0.000471536386896843	0.0593091988312922	C2	17	35081580	35117241	-	3872	protein_coding	complement component 2 (within H-2S) [Source:MGI Symbol;Acc:MGI:88226]	-	187	271	419	216	251	367	456	524	536	567	491	602	1.94678227142045	3.09511156467799	3.95811396646449	2.3098231869934	3.3886600755288	4.31038546609406	4.56396676782621	5.10394573583325	4.72676600332027	4.79168956116159	4.39413845971307
ENSMUSG00000018899	732.088224941775	714.741544763788	735.315346274694	693.568382693794	760.939079168584	781.68313973749	1098.10394398567	863.3873334522	898.974971735977	870.02407966882	821.314564168829	935.148673537687	736.389286263354	914.492261091531	-0.312429843785738	0.000492935245807674	0.0601896567024231	Irf1	11	53660841	53669200	+	3975	protein_coding	interferon regulatory factor 1 [Source:MGI Symbol;Acc:MGI:96590]	IRF	707	649	799	659	559	677	1094	900	1039	1037	922	1075	7.16957489004481	7.22021166794601	7.35223308280708	6.86449535924217	7.35130273688457	7.74527656109052	10.665793435714	8.53916659476292	8.92509971157677	8.53655390019541	8.0375073306743
ENSMUSG00000054855	19.6742238668935	31.9376036951462	23.9276583268361	26.3113953980954	34.0312647213141	43.8758630871856	108.405142550688	62.3557518604367	38.9353933860625	61.2456680962622	54.3385991478293	44.3651928841135	29.9596681825785	61.607624654232	-1.0439111593438	0.000494005448495439	0.0601896567024231	Rnd1	15	98561302	98575342	-	2967	protein_coding	Rho family GTPase 1 [Source:MGI Symbol;Acc:MGI:2444878]	-	19	29	26	25	25	38	108	65	45	73	61	51	0.258135169834056	0.432237872905232	0.320527592886842	0.348885400674333	0.440465700811433	0.582440336838021	1.41064972526926	0.826239437112636	0.517880584701948	0.805093420095887	0.712426200133957
ENSMUSG00000106706	1.03548546667861	1.10129667914297	4.60147275516079	0	1.36125058885256	0	6.02250791948265	9.59319259391334	6.05661674894306	9.22879930217649	10.6895604880976	12.1786803995606	1.34991758163916	8.96155957536228	-2.66692969136736	0.000511618137404742	1	C530043K16Rik	5	66749805	66752913	-	3109	TEC	RIKEN cDNA C530043K16 gene [Source:MGI Symbol;Acc:MGI:2444587]	-	1	1	5	0	1	0	6	10	7	11	12	14	0.0129655338304353	0.0142239967270752	0.0588245891639198	0	0.0168139174565136	0	0.0747899956197757	0.121307984754593	0.0768797531444534	0.115774503327368	0.133748252980872
ENSMUSG00000034422	1087.25974001254	1207.0211603407	994.838409665762	936.685676172196	1193.8167664237	1113.06136884334	1408.26310183903	1366.07062537326	1244.20212642573	1360.82840619366	1264.04052771754	1390.97928277838	1088.78052024304	1339.06401172127	-0.299368289436648	0.000534223164725531	0.062428333937465	Parp14	16	35653244	35691914	-	9306	protein_coding	poly (ADP-ribose) polymerase family, member 14 [Source:MGI Symbol;Acc:MGI:1919489]	-	1050	1096	1081	890	877	964	1403	1424	1438	1622	1419	1599	4.54817718813287	5.20822660473098	4.24885848216607	3.95992802743461	4.9263603738994	4.71085112643814	5.84261947889858	5.77107942223608	5.2763123842151	5.70333346843918	5.28380694333743
ENSMUSG00000088307	2.07097093335722	11.0129667914297	5.52176730619295	4.20982326369526	6.80625294426282	4.61851190391427	19.0712750783617	20.145704447218	18.1698502468292	8.38981754743318	21.3791209761951	15.6583033708636	5.7067155238087	17.1356786111501	-1.59408727765641	0.000609160339007015	0.0678234318943449	Gm24505	7	34916660	34916785	+	126	snoRNA	predicted gene, 24505 [Source:MGI Symbol;Acc:MGI:5454282]	-	2	10	6	4	5	4	19	21	21	10	24	18	0.639838804425767	3.50971474797434	1.74176807343454	1.31446728101682	2.07438370525003	1.44369296524512	5.84380930060287	6.28577541003382	5.69093220300251	2.59699084303598	6.60037013519891
ENSMUSG00000097305	12.4258256001433	9.91167011228674	8.28265095928942	8.41964652739052	5.44500235541026	11.5462797597857	31.116290917327	22.0643429660007	16.4393883185597	16.7796350948664	32.9594781716341	18.2680205993409	9.33851255238432	22.9378593446215	-1.28398897699062	0.000612702695425234	0.0678234318943449	Gm17276	17	32332385	32360817	+	5435	lncRNA	predicted gene, 17276 [Source:MGI Symbol;Acc:MGI:4936910]	-	12	9	9	8	4	10	31	23	19	20	37	21	0.0890005770277608	0.0732293748703386	0.0605693037496096	0.0609467810149473	0.038472470559191	0.0836730973417135	0.221042164607125	0.159602025130574	0.119368219161414	0.120412454911696	0.235900993332546
ENSMUSG00000106037	245.41005560283	273.121576427457	219.950397696686	253.641851637639	163.350070662308	177.812708300699	262.982845817409	303.144885967661	283.795756236189	386.770588936669	383.042584156829	325.344747816832	222.214443387937	324.180234821932	-0.542959419276609	0.000648041630877578	0.0693362464413626	Gm4332	3	119503165	119503510	+	346	processed_pseudogene	predicted gene 4332 [Source:MGI Symbol;Acc:MGI:3782515]	-	237	248	239	241	120	154	262	316	328	461	430	374	27.6110785805813	31.6969845215902	25.2657050883467	28.840399895489	18.1298737707402	20.2409091745783	29.3452742061913	34.444595888509	32.3692328771935	43.5979219967018	43.0645537000334
ENSMUSG00000078920	229.877773602651	205.942478999736	180.377732002303	153.658549124877	187.852581261654	178.967336276678	360.346723849045	349.192210418445	234.47759128051	359.923172784883	220.026786713341	213.12690699231	189.446075211316	289.515565339756	-0.611103153523287	0.000674337511725685	0.071003744335594	Ifi47	11	48967414	48987801	+	2473	protein_coding	interferon gamma inducible protein 47 [Source:MGI Symbol;Acc:MGI:99448]	-	222	187	196	146	138	155	359	364	271	429	247	245	3.61859503384504	3.3439506223927	2.89895567741875	2.44449455131272	2.9170549022958	2.85031577145544	5.62578734338158	5.55120642762388	3.74179367653946	5.67641500321338	3.46099068856417
ENSMUSG00000075389	256.800395736295	200.435995604021	214.428630390493	274.690967956116	255.915110704282	222.843199363863	325.215427652063	292.592374114357	256.973596348013	364.1180815586	422.237639279854	331.434088016613	237.519049959178	332.095201161583	-0.484506947959362	0.000676554461412166	0.071003744335594	2810410L24Rik	11	120076226	120080814	-	4394	lncRNA	RIKEN cDNA 2810410L24 gene [Source:MGI Symbol;Acc:MGI:1923627]	-	248	182	233	261	188	193	324	305	297	434	474	381	2.27511185260541	1.83169728267063	1.93957013730432	2.45946580584428	2.23659541237882	1.9974809700063	2.85757696964535	2.61788097413789	2.30797478055314	3.23199470324487	3.73805668671882
ENSMUSG00000010607	256.800395736295	283.033246539744	252.160706982811	227.330456239544	257.276361293135	239.007991027563	271.012856376719	302.18556670827	341.766230833216	413.618005088456	343.847529033805	342.742862673347	252.601526303182	335.862175118969	-0.412695533030621	0.000711538203185141	0.0728179882783226	Pigyl	9	22068142	22069654	+	777	protein_coding	phosphatidylinositol glycan anchor biosynthesis, class Y-like [Source:MGI Symbol;Acc:MGI:1913518]	-	248	257	274	216	189	207	270	315	395	493	386	394	12.865947851156	14.6269733550714	12.8984987059747	11.5104702445797	12.715411468938	12.1153152894219	13.4665306784874	15.2897239703525	17.3584418547181	20.7618889559471	17.2144788661269
ENSMUSG00000037321	1025.13061201182	1058.3461086564	1009.56312248228	792.499229390633	867.116625099084	879.826517695668	1259.70790649179	1250.9523142463	1139.50917976543	1146.04907697937	1070.73764222444	1175.2426585576	938.747035889313	1173.69979637749	-0.321341140342968	0.000720283648089815	0.0728179882783226	Tap1	17	34406527	34416199	+	5476	protein_coding	transporter 1, ATP-binding cassette, sub-family B (MDR/TAP) [Source:MGI Symbol;Acc:MGI:98483]	-	990	961	1097	753	637	762	1255	1304	1317	1366	1202	1351	7.2875723579319	7.76072534647957	7.32744907007149	5.69366447627437	6.08086869798313	6.32815234564985	8.88164204283122	8.98099101681969	8.21215234991341	8.16259452045254	7.60621543794243
ENSMUSG00000026227	25.8871366669652	12.1142634705727	4.60147275516079	23.1540279503239	13.6125058885256	6.9277678558714	31.116290917327	34.535493338088	14.7089263902903	91.4490112670216	53.4478024404878	36.5360411986817	14.3828624312366	43.6322609253161	-1.60274062643734	0.000773438809046725	0.0758568527182314	2810459M11Rik	1	85973585	85983178	+	3331	protein_coding	RIKEN cDNA 2810459M11 gene [Source:MGI Symbol;Acc:MGI:1920042]	-	25	11	5	22	10	6	31	36	17	109	60	42	0.302535610018188	0.146036164535948	0.0549041272022296	0.273469176146699	0.156933261399882	0.0819147314414073	0.360661712590731	0.40760356906854	0.174264510569275	1.07076170033792	0.624171898104971
ENSMUSG00000042616	109.761459467932	79.2933608982939	116.877407981084	115.77013975162	93.926290630827	94.6794940302425	142.532687427756	169.799508912266	105.558177624436	156.889588137	148.763050126024	189.639451936015	101.71802546	152.197077360583	-0.578039289185684	0.000813332603440247	0.0783700661221342	Oscp1	4	125952358	125985988	+	5254	protein_coding	organic solute carrier partner 1 [Source:MGI Symbol;Acc:MGI:1916308]	-	106	72	127	110	69	82	142	177	122	187	167	218	0.813255336116344	0.606016981226175	0.884144547363897	0.866887919437243	0.686512825787734	0.709756172293137	1.04739683054902	1.2705545271138	0.792874452340662	1.16464214395915	1.10142263342894
ENSMUSG00000027890	283.723017869938	291.843619972887	249.399823329715	283.110614483506	307.64263308068	371.790208265099	413.545543804475	430.734347466709	381.566855183413	390.965497710386	326.922391594317	400.156641699847	297.918319500304	390.648546243191	-0.392730252168919	0.000944740020599766	0.0868507392415645	Gstm4	3	107947724	107952210	-	1707	protein_coding	glutathione S-transferase, mu 4 [Source:MGI Symbol;Acc:MGI:95862]	-	274	265	271	269	226	322	412	449	441	466	367	460	6.47035585354282	6.86522410280394	5.80691394605505	6.52497862079438	6.92093150447568	8.57842867397847	9.35355435552974	9.92025714975461	8.8214449965698	8.93291823899829	7.45006629056503
ENSMUSG00000043964	337.568262137226	349.111047288322	322.103092861255	362.044800677792	390.678919000686	385.645743976841	418.564300404044	468.147798582971	455.111487134864	411.101059824226	470.340661476293	421.034379527665	357.858644323687	440.716614491677	-0.30294831956406	0.00095620385062015	0.0868545398038569	Orai3	7	127368987	127374322	+	2141	protein_coding	ORAI calcium release-activated calcium modulator 3 [Source:MGI Symbol;Acc:MGI:3039586]	-	326	317	350	344	287	334	417	488	526	490	528	484	6.13779045553312	6.54764252515605	5.97944667900227	6.65276387533781	7.00736698264845	7.09439219399528	7.54800826648334	8.59633367612285	8.38887530718166	7.48894043199634	8.54564503258822
ENSMUSG00000050270	81.80335186761	96.9141077645814	59.8191458170902	73.6719071146671	85.7587870977116	98.1433779581782	110.412645190515	118.955588164525	110.749563409245	118.296427418808	165.688187565512	116.567369538651	82.6851129366398	123.444963547876	-0.583244390081211	0.000980571501664232	0.0882889433492981	Tmem220	11	66915980	66926138	+	1669	protein_coding	transmembrane protein 220 [Source:MGI Symbol;Acc:MGI:2443691]	-	79	88	65	70	63	85	110	124	128	141	186	134	1.90801541619356	2.33167867738403	1.4245137329168	1.73660896024091	1.97321244485018	2.3160502782767	2.55416722608419	2.80204727685151	2.61871535764286	2.7644181735996	3.86175041163675
ENSMUSG00000025381	708.272059208167	733.463588309219	647.887363926639	684.09628035048	673.81904148202	681.230505827355	792.963542731882	791.43838899785	872.152811847801	787.803867703975	816.860580632122	784.654980028831	688.128139850647	807.645695323744	-0.231371759077515	0.00100196493875282	0.088434706565773	Cnpy2	10	128158328	128163422	+	1740	protein_coding	canopy FGF signaling regulator 2 [Source:MGI Symbol;Acc:MGI:1928477]	-	684	666	704	650	495	590	790	825	1008	939	917	902	15.8459389427099	16.9265070569549	14.7990225273886	15.4676537809307	14.8711852524649	15.4201343442992	17.5950628488206	17.8819472871652	19.7808953814708	17.6586422185609	18.2619723697594
ENSMUSG00000030170	267.155250403081	183.916545416876	127.000648042438	270.481144692421	88.4812882754167	269.028318403006	285.065374855512	383.727703756533	243.129900921857	468.990800901514	464.105084524902	351.441920101605	201.010532538873	366.076797510321	-0.863908357430524	0.00102173270554953	0.088434706565773	Wnt5b	6	119409492	119521308	-	2654	protein_coding	wingless-type MMTV integration site family, member 5B [Source:MGI Symbol;Acc:MGI:98959]	-	258	167	138	257	65	233	284	400	281	559	521	404	3.91859077887582	2.78264573198478	1.90190048109016	4.00952142934124	1.28027148048212	3.99245837167165	4.1469652959341	5.68419780862139	3.61526439120657	6.89210448524478	6.8024349707245
ENSMUSG00000103662	16.5677674668577	20.9246369037165	34.0508983881898	28.416307029943	23.1412600104936	33.4842113033784	32.1200422372408	48.925282228958	43.2615482067362	40.2711242276792	79.2809069533902	60.8934019978029	26.0975135170965	50.7920509753012	-0.95866556262318	0.00106099400682883	0.088434706565773	Gm34294	2	169465976	169470238	-	4263	TEC	predicted gene, 34294 [Source:MGI Symbol;Acc:MGI:5593453]	-	16	19	37	27	17	29	32	51	50	48	89	70	0.151291934051413	0.197097281413337	0.317465116832896	0.262245935375277	0.208460234419215	0.309362778266811	0.290902614912043	0.451195701494335	0.400487839760909	0.368440080194267	0.723439583784117
ENSMUSG00000038507	811.820605876028	829.276399394657	744.518291785016	741.98135022629	782.719088590225	742.425788554219	906.387441882139	914.231254199941	898.974971735977	896.032514065863	872.980773194634	1032.57811673417	775.456920737739	920.197511968788	-0.247225325280074	0.00106182451357854	0.088434706565773	Parp12	6	39063344	39095283	-	3995	protein_coding	poly (ADP-ribose) polymerase family, member 12 [Source:MGI Symbol;Acc:MGI:2143990]	-	784	753	809	705	575	643	903	953	1039	1068	980	1187	7.91061782933604	8.33528700521425	7.40698317886844	7.3068916503582	7.52385979701451	7.31946912754875	8.75959336807843	8.99676190101962	8.88041836133108	8.74773125821442	8.50035152580686
ENSMUSG00000057729	49.7033024005732	46.2544605240048	54.2973785108973	42.0982326369526	38.1150164878718	83.1332142704568	71.266343713878	70.0303059355674	77.0055558079904	173.669223231867	69.4821431726342	170.501525593848	52.2669341384594	105.325849575964	-1.01160673101767	0.00110378672984807	0.0906631219823785	Prtn3	10	79710310	79719008	+	1732	protein_coding	proteinase 3 [Source:MGI Symbol;Acc:MGI:893580]	-	48	42	59	40	28	72	71	73	89	207	78	196	1.11713195414753	1.07236780867669	1.24598766916016	0.956252179030711	0.845083800475995	1.89047092677594	1.58863249067683	1.58958985542426	1.75459457067168	3.91078032148178	1.5605378581778
ENSMUSG00000082192	5.17742733339304	4.40518671657188	10.1232400613537	4.20982326369526	10.8900047108205	4.61851190391427	15.0562697987066	17.267746669044	13.8436954261556	19.2965803590963	22.2699176835366	13.9184918852121	6.57069899829145	16.9421169702919	-1.37435391547206	0.00113823891818665	0.0919351110537328	Gm14719	X	48749837	48750176	+	340	processed_pseudogene	predicted gene 14719 [Source:MGI Symbol;Acc:MGI:3705771]	-	5	4	11	4	8	4	15	18	16	23	25	16	0.592791833512108	0.52026359793502	1.18337772048053	0.48712611002388	1.22998751464237	0.535015628296721	1.70972129692561	1.99665807142251	1.60685144555365	2.21355278327008	2.54793700072017
ENSMUSG00000037032	244.374570136151	254.399532882026	276.088365309647	284.16307029943	269.527616592808	245.935758883435	291.087882774995	306.982163005227	342.63146179735	347.338446463733	337.611952082415	333.173899502264	262.41481901725	326.470967604331	-0.315917408707044	0.00117046143149943	0.0933040900511055	Apbb1	7	105207690	105230860	-	4408	protein_coding	amyloid beta (A4) precursor protein-binding, family B, member 1 [Source:MGI Symbol;Acc:MGI:107765]	-	236	231	300	270	198	213	290	320	396	414	379	383	2.15814957899326	2.31746273717199	2.48936907047132	2.53619424343195	2.34808188196814	2.1974723117768	2.54958439015222	2.73790580473342	3.067526069495	3.07326293865991	2.9793753349619
ENSMUSG00000036306	114.938886801325	101.319294481153	94.7903387563122	90.5112001694481	87.1200376865641	110.844285693942	124.465163669308	142.938569649309	91.7144821982807	192.965803590963	216.463599883976	195.728792135795	99.9206739314576	160.712735187939	-0.685730247073213	0.00117217616317162	0.0933040900511055	Lzts1	8	69585321	69636877	-	6802	protein_coding	leucine zipper, putative tumor suppressor 1 [Source:MGI Symbol;Acc:MGI:2684762]	-	111	92	103	86	64	96	124	149	106	230	243	225	0.657805463003439	0.598127217855315	0.553873028938387	0.52350659574751	0.491850343991069	0.641829980432408	0.706477015371788	0.826151604905945	0.532113037505086	1.10645096488066	1.2379332843252
ENSMUSG00000042419	150.145392668398	145.371161646872	160.131251879595	150.501181677106	152.460065951487	173.194196396785	172.645227025169	184.189297803136	199.868352715121	220.652201497493	216.463599883976	224.435681649045	155.300541703374	203.04239342899	-0.388458538453783	0.00120454171132431	0.0945772030184416	Nfkbil1	17	35439151	35454768	-	1746	protein_coding	nuclear factor of kappa light polypeptide gene enhancer in B cells inhibitor like 1 [Source:MGI Symbol;Acc:MGI:1340031]	-	145	132	174	143	112	150	172	192	231	263	243	258	3.34761023965028	3.34327466714257	3.64514349388878	3.39119007293257	3.35323056683717	3.90690106574066	3.81765946713285	4.1473157344553	4.51754411990921	4.92892798147345	4.82269312713632
ENSMUSG00000055862	211.239035202436	289.641026614601	224.551870451846	227.330456239544	247.747607171167	316.368065418127	286.069126175426	331.924463749401	328.787766371195	347.338446463733	385.714974278854	347.962297130302	252.813010182954	337.966179028152	-0.421099657458855	0.00122120855641586	0.0950877992811954	Izumo4	10	80538018	80541207	+	2799	protein_coding	IZUMO family member 4 [Source:MGI Symbol;Acc:MGI:1918814]	-	204	263	244	216	182	274	285	346	380	414	433	400	2.93790936565915	4.15523141544744	3.18857435093912	3.1952966702531	3.39905445721999	4.45177348446968	3.94598055667718	4.66211852491254	4.6357004011596	4.83992248432043	5.36058999994317
ENSMUSG00000002985	21078.3421597097	32304.3354893008	32935.5013923389	24283.3130408102	32743.5216642596	42150.8488910736	33870.5845391704	43518.5588830285	43999.5902191431	66001.855663902	39616.4019655969	51853.3415183576	30915.9771062488	46476.7221315331	-0.588171058311476	0.00123362788756538	0.0950877992811954	Apoe	7	19430034	19433113	-	2138	protein_coding	apolipoprotein E [Source:MGI Symbol;Acc:MGI:88057]	-	20356	29333	35788	23073	24054	36506	33744	45364	50853	78669	44473	59608	383.791954294728	606.723961669492	612.264879351535	446.844790743397	588.124455697532	776.50086284425	611.648395721098	800.228014127524	812.163635133639	1204.02884712257	720.802558638532
ENSMUSG00000066258	249.551997469544	258.804719598598	288.972489024098	249.432028373944	307.64263308068	296.739389826492	400.496776645596	445.124136357579	293.313296841671	432.914585447552	318.014424520902	340.13314544487	275.190542895559	371.666060876362	-0.434193985456331	0.00123498143146057	0.0950877992811954	Trim12a	7	103949101	103964673	-	5781	protein_coding	tripartite motif-containing 12A [Source:MGI Symbol;Acc:MGI:1923931]	-	241	235	314	237	226	257	399	464	339	516	357	391	1.6804484635178	1.79765877335271	1.98671833181584	1.69748408345114	2.0435962771389	2.02169458573635	2.67474821127749	3.0270885212825	2.00231034438801	2.92070501039314	2.13989685623535
ENSMUSG00000028952	142.896994401648	113.433557951726	125.160058940373	123.137330463086	117.067550641321	161.647916636999	150.562697987066	173.636785949831	166.989576078002	177.864132005583	213.791209761951	192.249169164492	130.557234839192	179.182261824488	-0.457187942942043	0.00126381990251021	0.0960660488083556	Zbtb48	4	152104231	152112128	-	3199	protein_coding	zinc finger and BTB domain containing 48 [Source:MGI Symbol;Acc:MGI:2140248]	ZBTB	138	103	136	117	86	140	150	181	193	212	240	221	1.73890545973042	1.42385364173839	1.55501394739889	1.51436985438809	1.4053155254823	1.99021130876242	1.81714673633856	2.13390187411589	2.0600498565417	2.1685157674016	2.5997081495313
ENSMUSG00000035835	267.155250403081	275.324169785743	282.530427166872	308.369554065678	224.606347160673	456.078050511534	415.553046444303	433.612305244883	300.235144554749	579.736392527632	481.921018671732	595.015528092816	302.343966515597	467.678905922686	-0.629293362315161	0.0012690456213808	0.0960660488083556	Plppr3	10	79696309	79710468	-	4357	protein_coding	phospholipid phosphatase related 3 [Source:MGI Symbol;Acc:MGI:2388640]	-	258	250	307	293	165	395	414	452	347	691	541	684	2.38694971933358	2.53743434843222	2.5772730707901	2.78445622449959	1.97963907423219	4.12282527428561	3.68235589863436	3.91255976865084	2.71942181470076	5.18957091438538	4.30266267534972
ENSMUSG00000096727	511.529820539232	484.570538822907	393.886067841763	345.205507623011	371.62141075675	407.583675520434	514.924427115767	535.300146740364	526.060426193912	570.507593225456	537.150414526902	544.560995008923	419.066170184016	538.084000468554	-0.360088430901845	0.00127249621378742	0.0960660488083556	Psmb9	17	34400961	34406738	-	3660	protein_coding	proteasome (prosome, macropain) subunit, beta type 9 (large multifunctional peptidase 2) [Source:MGI Symbol;Acc:MGI:1346526]	-	494	440	428	328	273	353	513	558	608	680	603	626	5.44072766976468	5.31635479857097	4.27732553115564	3.71067648837863	3.89916124006506	4.38610489809921	5.4318686449866	5.74993881770307	5.67227340889431	6.07951298992686	5.7090496599743
ENSMUSG00000087445	71.4484972008239	88.1037343314377	78.2250368377334	96.825935064991	104.816295341647	65.8137946307783	149.558946667152	99.7692029766987	100.366791839628	121.652354437781	129.165522564512	187.029734707537	84.2055489012353	131.257092198885	-0.643462865796612	0.00130921475282396	0.0979124241952349	Gm14286	2	157386186	157387389	-	464	lncRNA	predicted gene 14286 [Source:MGI Symbol;Acc:MGI:3650190]	-	69	80	85	92	77	57	149	104	116	145	145	215	5.99435190266985	7.62455272835805	6.70055174801865	8.20975469910935	8.67485806393785	5.58653172219313	12.4446093250361	8.45328417211445	8.53639830450377	10.2256514444542	10.8287322530607
ENSMUSG00000034192	246.445541069509	281.931949860601	237.435994166297	245.222205110249	204.187588327885	294.430133874535	337.260443491028	349.192210418445	346.957616618024	340.626592425787	301.089287081415	284.459177904022	251.608902068179	326.597554656454	-0.374906737797782	0.00131608150238655	0.0979124241952349	Lsm3	6	91492910	91499607	+	2753	protein_coding	LSM3 homolog, U6 small nuclear RNA and mRNA degradation associated [Source:MGI Symbol;Acc:MGI:1914928]	-	238	256	258	233	150	255	336	364	401	406	338	327	3.48483219526333	4.11221790449184	3.42786030580034	3.5043707261253	2.84822753572289	4.21230066957189	4.72983559658025	4.98660860716087	4.97362255009954	4.8257051785815	4.25439767704703
ENSMUSG00000023243	136.684081601576	80.3946575774369	88.3482768990871	199.966605025525	59.8950259095129	217.070059483971	190.712750783617	380.849745978359	142.763109082229	343.143537690017	280.600962812561	235.74445630578	130.393117749518	262.302427108761	-1.00743992206011	0.00134734151737192	0.0986673163632765	Kcnk5	14	20190125	20231877	-	3404	protein_coding	potassium channel, subfamily K, member 5 [Source:MGI Symbol;Acc:MGI:1336175]	-	132	73	96	190	44	188	190	397	165	409	315	271	1.56313146228105	0.948365342299295	1.0315524195194	2.31113004608862	0.675698194001538	2.51161860757391	2.16310215004689	4.39856551900721	1.6551183551623	3.93164882799695	3.20662811724007
ENSMUSG00000104156	94.2291774677533	67.1790974277212	77.3047422867012	76.8292745624385	95.2875412196795	115.462797597857	118.442655749825	139.101292611743	102.962484732032	145.143843570594	130.056319271854	127.00623845256	87.7154384270251	127.118805731435	-0.539310164501067	0.001399247285067	0.100240858765431	Gm38102	5	123272002	123275758	+	2006	lncRNA	predicted gene, 38102 [Source:MGI Symbol;Acc:MGI:5611330]	-	91	61	84	73	70	100	118	145	119	173	146	146	1.82861209659667	1.34474913025577	1.53164450724752	1.50678839117556	1.82413402595267	2.26701537413865	2.27962839590081	2.72613390165973	2.02558603835683	2.82199433681447	2.52202577698403
ENSMUSG00000028681	468.039430938731	596.90280009549	660.771487641089	509.388614907127	236.857602460346	600.406547508855	968.620023716793	659.052331201846	945.697443799252	842.337681762291	962.951240636122	565.438732836741	512.06108059194	824.016242325508	-0.685092646803045	0.00145081977886953	0.102694359220577	Ptch2	4	116953272	116973298	+	5974	protein_coding	patched 2 [Source:MGI Symbol;Acc:MGI:1095405]	-	452	542	718	484	174	520	965	687	1093	1004	1081	650	3.04989116083498	4.01214328035929	4.39611299150418	3.35459795218989	1.52255736035828	3.95843501351106	6.26001068542899	4.33712190160017	6.24726035943932	5.49932590571516	6.27029638597048
ENSMUSG00000028551	1506.63135401737	2119.99610735022	1921.57502255515	1643.935984473	1856.7458031949	1540.27371995541	2929.95010282831	3239.62113896453	2851.80125778805	1881.83607588926	2211.84822432885	1862.46819538994	1764.85966525767	2496.25416586482	-0.500077069758624	0.00145219309937455	0.102694359220577	Cdkn2c	4	109518073	109524386	-	2686	protein_coding	cyclin dependent kinase inhibitor 2C [Source:MGI Symbol;Acc:MGI:105388]	-	1455	1925	2088	1562	1364	1334	2919	3377	3296	2243	2483	2141	21.8357498167118	31.6932729754719	28.4337477602225	24.0788286030791	26.5459330691803	22.5857863337919	42.1154132128763	47.4171188972842	41.9001769346901	27.3252553267738	32.0330510014591
ENSMUSG00000036995	334.46180573719	321.578630309748	319.342209208159	388.356196075888	276.333869537071	331.378229105849	462.72935848025	550.649254890625	412.715169892263	343.98251944476	573.673079527902	383.628432586158	328.575156662317	454.562969136993	-0.466617920056664	0.00147524255582502	0.103436474860974	Asap3	4	135933676	135972527	+	4225	protein_coding	ArfGAP with SH3 domain, ankyrin repeat and PH domain 3 [Source:MGI Symbol;Acc:MGI:2684986]	-	323	292	347	369	203	287	461	574	477	410	644	441	3.08167569970649	3.05631775165614	3.00408614227633	3.61626282624828	2.51164906096499	3.08916124314757	4.22850834051471	5.123836807611	3.85501726982087	3.17539756097607	5.28185832594261
ENSMUSG00000028821	976.462795077927	1020.90202156553	1030.72989715602	910.3742807741	961.042915729911	1095.74194920366	1096.09644134584	1173.2474542356	1144.70056555024	1274.4132854551	1146.45536234846	1308.33823720994	999.208976584525	1190.5418910242	-0.25297305921346	0.00151798289415144	0.105013588888091	Syf2	4	134658209	134664859	+	2043	protein_coding	SYF2 homolog, RNA splicing factor (S. cerevisiae) [Source:MGI Symbol;Acc:MGI:1915842]	-	943	927	1120	865	706	949	1092	1223	1323	1519	1287	1504	18.6060614449977	20.0656731274057	20.0520729746355	17.5310559175261	18.0645009186708	21.1243444231791	20.7141564079797	22.5771022803858	22.111903978186	24.329342408812	21.8291977048484
ENSMUSG00000001493	201.919666002328	221.360632507737	136.203593552759	161.025739836344	159.26631889575	121.23593747775	290.084131455081	277.243265964095	213.712048141277	224.847110271209	213.791209761951	227.045398877522	166.835314712111	241.120527411856	-0.530150742843719	0.00153116254467054	0.105013588888091	Meox1	11	101768336	101785200	-	2228	protein_coding	mesenchyme homeobox 1 [Source:MGI Symbol;Acc:MGI:103220]	Homeobox	195	201	148	153	117	105	289	289	247	268	240	261	3.52801602889163	3.98954379296222	2.42971955665824	2.84339096088894	2.74511351730664	2.14318423812757	5.02684663781897	4.89207116741411	3.78544054077636	3.93604967628542	3.73270483408915
ENSMUSG00000010663	1239.47610361429	1068.25777876868	1642.7257735924	1327.14678387993	1308.16181588731	1906.29078834061	1813.77863508419	1834.21842395623	1581.64220243827	2152.82718267135	2036.36127298259	2274.80351748935	1415.34317401387	1948.93853910366	-0.461496175400514	0.00153413695278321	0.105013588888091	Fads1	19	10160252	10174241	+	4812	protein_coding	fatty acid desaturase 1 [Source:MGI Symbol;Acc:MGI:1923517]	-	1197	970	1785	1261	961	1651	1807	1912	1828	2566	2286	2615	10.0271995179866	8.91432536362061	13.5681995496039	10.8505012682688	10.4396851759728	15.6029547375354	14.5527648989354	14.985539381527	12.9713517045992	17.4490584249173	16.4618333702389
ENSMUSG00000087413	73.5194681341811	85.9011409731517	65.3409131232832	99.9833025127624	84.397536508859	70.4323065346926	131.491422908705	151.572442983831	83.0621725569334	129.203190230471	178.159341468293	91.3401029967043	79.9291112978217	127.471445524156	-0.673970543255665	0.00157937287131199	0.106652978691015	Gm11266	4	82426167	82465538	+	1366	lncRNA	predicted gene 11266 [Source:MGI Symbol;Acc:MGI:3649705]	-	71	78	71	95	62	61	131	158	96	154	200	105	2.09516762239858	2.52514469568754	1.90115387810461	2.87960712916752	2.37263330972376	2.03078772526976	3.71649519595249	4.36230972819331	2.3996902993627	3.68901978903881	5.07349095311776
ENSMUSG00000036867	424.549041338229	558.357416325486	495.118468455301	508.336159091203	413.82017901118	417.975327304241	734.745966176883	573.672917116018	586.626593683342	685.44809362529	656.517173310659	487.147215982423	469.692765254273	620.692993315769	-0.400948719095255	0.0015964760950893	0.107218971782157	Smad6	9	63860358	63929341	-	3205	protein_coding	SMAD family member 6 [Source:MGI Symbol;Acc:MGI:1336883]	MH1	410	507	538	483	304	362	732	598	678	817	737	560	5.15664159697896	6.99555686521363	6.13993625387315	6.2399258805087	4.95832720411215	5.1364838947551	8.85107511968476	7.03693047463381	7.22331113941161	8.34132391150734	7.96832516243944
ENSMUSG00000031451	3383.96650510569	4223.47276451329	4652.08895546756	3797.26058385313	3073.70382962909	6857.33554933671	5639.07491527559	6195.28377714923	6758.31906085632	7027.31117773003	5439.20469502698	6752.20837581351	4331.30469798424	6301.90033364194	-0.540956804135944	0.0016017358219233	0.107218971782157	Gas6	8	13515374	13544490	-	2548	protein_coding	growth arrest specific 6 [Source:MGI Symbol;Acc:MGI:95660]	-	3268	3835	5055	3608	2258	5939	5618	6458	7811	8376	6106	7762	51.7003816367326	66.5592332562277	72.5656945978978	58.6310186115084	46.3248633605397	105.998396545765	85.4466992067907	95.5891780172647	104.674736509386	107.566789951332	83.0395467970973
ENSMUSG00000024968	200.88418053565	242.285269411454	252.160706982811	190.494502682211	136.125058885256	212.451547580056	244.915322058961	278.202585223487	275.143446594842	277.702960820038	360.772666473293	305.33691573184	205.73354434624	290.345649483743	-0.493596362062384	0.00162223487704318	0.107347646863616	Rcor2	19	7244690	7252590	+	3157	protein_coding	REST corepressor 2 [Source:MGI Symbol;Acc:MGI:1859854]	MYB	194	220	274	181	100	184	244	290	318	331	405	351	2.47706996125807	3.08170075431893	3.17457506954145	2.37391042214678	1.65582734787142	2.65050504484026	2.9952165303125	3.46444384335092	3.43943574384821	3.43079189419255	4.44537123850703
ENSMUSG00000032584	456.649090805266	640.954667261209	690.220913274118	429.401972896917	552.667739074141	867.125609959904	866.237389085588	817.340009001416	808.125720501832	906.939276877526	865.854399535902	852.50762796924	606.169998878593	852.834070495251	-0.492627741547272	0.00167837491007448	0.109740410290862	Mst1r	9	107784072	107797582	+	5007	protein_coding	macrophage stimulating 1 receptor (c-met-related tyrosine kinase) [Source:MGI Symbol;Acc:MGI:99614]	-	441	582	750	408	406	751	863	852	934	1081	972	980	3.55035779975257	5.14029162968752	5.47889897275694	3.37398312275378	4.2387526593078	6.82099513327765	6.67953429124441	6.41759215020829	6.36947954176674	7.06462422142119	6.72692007188337
ENSMUSG00000024193	312.716610936939	359.022717400609	400.328129698989	408.35285657844	363.453907223635	467.62433027132	444.661834721802	545.852658593669	386.758240968221	575.541483753916	571.89148611322	649.819589890839	385.249758684989	529.087549006945	-0.457973231842498	0.00168962785269977	0.110039518296182	Phf1	17	27152026	27156882	+	3486	protein_coding	PHD finger protein 1 [Source:MGI Symbol;Acc:MGI:98647]	-	302	326	435	388	267	405	443	569	447	686	642	747	3.49213226993822	4.13554340183001	4.56427175869895	4.60855396115535	4.00381047688018	5.28339443606271	4.92480821845353	6.15594872342383	4.37839362261983	6.43928572887717	6.38168317288811
ENSMUSG00000109857	10.3548546667861	6.60778007485783	16.5653019185788	26.3113953980954	31.308763543609	15.0101636877214	55.2063225952576	47.0066437101753	37.2049314577931	18.457598604353	53.4478024404878	33.0564182273787	17.6930432149414	40.7299528392409	-1.21172191744798	0.00177109051217186	0.113549643459361	Gm53058	16	13265767	13285110	+	3279	lncRNA	predicted gene 53058 [Source:MGI Symbol;Acc:MGI:6435685]	-	10	6	18	25	23	13	55	49	43	22	60	38	0.122933347602389	0.0809193153238366	0.200789366196479	0.315688619640361	0.366670568942641	0.180296513957876	0.650031274829904	0.563591939783453	0.447776916247224	0.219544331103865	0.63407032405845
ENSMUSG00000102759	0	0	4.60147275516079	0	0	2.30925595195713	9.03376187922398	14.38978889087	8.65230964134723	10.0677810569198	4.45398353670732	4.34952871412878	1.15178811785299	8.49119228653285	-2.79966665078143	0.00182891772711119	1	Gm10463	5	32287627	32290515	-	2889	TEC	predicted gene 10463 [Source:MGI Symbol;Acc:MGI:3642170]	-	0	0	5	0	0	2	9	15	10	12	5	5	0	0	0.0633041355869251	0	0	0.0314824011112643	0.120727983583532	0.195818548599184	0.118191738380114	0.135917277766369	0.0599722104703951
ENSMUSG00000120863	112.867915867968	107.927074556011	149.08771726721	131.556976990477	102.093794163942	135.091473189492	156.585205906549	164.043593355918	186.8898882531	145.982825325337	191.521292078415	163.542279651242	123.104158672517	168.09418076176	-0.445001946008606	0.0018501243183957	0.117825608804936	ENSMUSG00000120863	13	54729502	54730576	+	1075	lncRNA	novel transcript	-	109	98	162	125	75	117	156	171	216	174	215	188	4.08723076278302	4.03143792632439	5.51208835890633	4.81461852930579	3.64705600271866	4.94951667294036	5.62379023807344	5.99926099599507	6.8608819861314	5.29641183653217	6.93038864195886
ENSMUSG00000021018	123.222770534754	142.067271609443	137.123888103792	161.025739836344	130.680056529846	161.647916636999	173.648978345083	182.270659284353	192.946505002043	200.516639383653	163.906594150829	225.305587391871	142.627940541863	189.765827259639	-0.412787770341791	0.00185208670756074	0.117825608804936	Polr2h	16	20536415	20541017	+	1509	protein_coding	polymerase (RNA) II (DNA directed) polypeptide H [Source:MGI Symbol;Acc:MGI:2384309]	-	119	129	149	153	96	140	173	190	223	239	184	259	3.17884129673955	3.78044423549204	3.6116582516744	4.19819420865511	3.32561236563345	4.2191424630424	4.44293380539714	4.74869712885259	5.04603531319905	5.18262307801097	4.22528664718499
ENSMUSG00000032519	305.468212670189	342.503267213464	363.516347657702	339.943228543392	385.233916645276	330.22360112987	494.849400717491	459.513925248449	429.154558210823	424.524767900119	348.301512570512	461.919949440476	344.481428976649	436.377352347978	-0.341502344073375	0.00186648638071083	0.118284984980663	Slc25a38	9	119939440	119953570	+	2747	protein_coding	solute carrier family 25, member 38 [Source:MGI Symbol;Acc:MGI:2384782]	-	295	311	395	323	283	286	493	479	496	506	391	531	4.32886937759479	5.0066138374271	5.25954356357463	4.86860114696237	5.38539309514421	4.73470328499937	6.95506573936828	6.57638097140051	6.16534919407917	6.02743895844929	4.9322569330286
ENSMUSG00000097115	0	1.10129667914297	2.76088365309647	6.31473489554289	4.08375176655769	2.30925595195713	8.0300105593102	12.4711503720873	9.51754060548196	17.6186168496097	10.6895604880976	6.08934019978029	2.76165382438286	10.7360365123945	-1.97342527436851	0.00187754222791135	1	1810019N24Rik	7	12682518	12695753	-	2142	lncRNA	RIKEN cDNA 1810019N24 gene [Source:MGI Symbol;Acc:MGI:1916336]	-	0	1	3	6	3	2	8	13	11	21	12	7	0	0.0206453808704373	0.0512284727480747	0.115982407148543	0.0732135425382364	0.042461557801327	0.144738310850845	0.228893782438206	0.175350852193355	0.320804751198563	0.194128533388203
ENSMUSG00000047182	746.585021475276	952.62162745867	771.206833764948	659.889796584232	826.279107433507	766.672976049769	1310.89922380739	1210.66090535186	1222.57135232236	841.498700007547	1016.39904307661	816.841492513384	787.209227127734	1069.81178617986	-0.442448322134651	0.00189955329080808	0.119284331418259	Irs3	5	137641293	137643976	-	2338	protein_coding	insulin receptor substrate 3 [Source:MGI Symbol;Acc:MGI:1194882]	-	721	865	838	627	607	664	1306	1262	1413	1003	1141	939	12.4308802452659	16.3611552772337	13.1101944210013	11.1041000999669	13.5716864452466	12.9154328747078	21.6476944592771	20.357524125225	20.6363230184154	14.0377463114286	16.9109782730433
ENSMUSG00000020672	35.2065058670727	45.1531638448618	38.6523711433506	53.6752466121146	44.9212694321346	55.4221428469712	85.3188621926709	53.7218785259147	70.9489390590473	76.3473396816419	54.3385991478293	106.128500624742	45.5051166244176	74.4673532053077	-0.713907718575232	0.0019039739735997	0.119284331418259	Sntg2	12	30224481	30423374	-	3410	protein_coding	syntrophin, gamma 2 [Source:MGI Symbol;Acc:MGI:1919541]	-	34	41	42	51	33	48	85	56	82	91	61	122	0.401916339906156	0.531706345690189	0.450510099932336	0.619264424326545	0.505881961667427	0.640136001011912	0.966000889172044	0.619360861516529	0.821096376503588	0.873228651209694	0.619873470908344
ENSMUSG00000046338	1.03548546667861	3.30389003742891	0.920294551032158	1.05245581592382	2.72250117770513	2.30925595195713	10.0375131991378	9.59319259391334	3.46092385653889	10.0677810569198	5.34478024404878	10.4388689139091	1.89064716678763	8.15717664407794	-2.14465493640292	0.00194214373799111	1	Gpat2	2	127267119	127278012	+	2628	protein_coding	glycerol-3-phosphate acyltransferase 2, mitochondrial [Source:MGI Symbol;Acc:MGI:2684962]	-	1	3	1	1	2	2	10	10	4	12	6	12	0.0153386014759602	0.0504821984297679	0.0139182380297281	0.015755600971092	0.039782701196576	0.0346090779339583	0.147464546157967	0.143510854110361	0.051971983589064	0.149415911517139	0.0791140255931377
ENSMUSG00000004952	783.862498275706	931.696990554953	839.308630541328	663.047164032004	984.184175740404	912.156101023068	1429.34187955722	1095.5425942249	892.0531240229	1187.15918296179	1117.0590710062	1048.23642010503	852.375926694577	1128.23204531301	-0.404928083803186	0.0019755849852364	0.122836655855623	Rasa4	5	136112770	136140714	+	7485	protein_coding	RAS p21 protein activator 4 [Source:MGI Symbol;Acc:MGI:1858600]	-	757	846	912	630	723	790	1424	1142	1031	1415	1254	1205	4.07676051060378	4.99828394489075	4.45669233699643	3.48505052662375	5.04935756261503	4.79977280429189	7.37277811729683	5.75419280020731	4.70328745594837	6.1859385090833	5.80541573614991
ENSMUSG00000102211	9.31936920010747	5.50648339571485	11.0435346123859	6.31473489554289	13.6125058885256	3.4638839279357	27.1012856376719	19.1863851878267	22.4960050675028	18.457598604353	11.580357195439	19.1379263421666	8.21008532003541	19.65992633916	-1.26330064846186	0.002003600569849	0.123645417937835	Gm37490	1	176717073	176717796	+	724	TEC	predicted gene, 37490 [Source:MGI Symbol;Acc:MGI:5610718]	-	9	5	12	6	10	3	27	20	26	22	13	22	0.501089229432887	0.305403355141414	0.60625076589158	0.343141320596932	0.722023057628464	0.188437824883514	1.44523402447303	1.0418412281824	1.22622296086794	0.994317488521512	0.622203400175864
ENSMUSG00000022516	431.797439604979	482.367945464621	386.523711433506	348.362875070783	393.401420178391	344.079136841613	444.661834721802	531.462869702799	575.378591149591	511.778870393424	459.651100988195	523.683257181105	397.755421432316	507.769420689486	-0.352550096391237	0.00212028886636036	0.129392591300072	Nudt16l1	16	4756625	4758896	+	1948	protein_coding	nudix (nucleoside diphosphate linked moiety X)-type motif 16-like 1 [Source:MGI Symbol;Acc:MGI:1914161]	-	417	438	420	331	289	298	443	554	665	610	516	602	8.62895545742779	9.94323087839877	7.88623942900033	7.03557140940547	7.7552985875744	6.95685105993631	8.81308082624692	10.7258303197908	11.6564781776078	10.2466486753463	9.17885148678329
ENSMUSG00000033318	673.065553341095	723.551918196932	771.206833764948	795.656596838404	883.451632165315	706.632321298883	862.222383805933	968.912451985247	812.451875322505	949.727346369435	983.439564904976	1163.93388390086	758.927475934263	956.781251048159	-0.335115528248087	0.00215827815269503	0.13066334435647	Gstt2	10	75666948	75673258	-	4156	protein_coding	glutathione S-transferase, theta 2 [Source:MGI Symbol;Acc:MGI:106188]	-	650	657	838	756	649	612	859	1010	939	1132	1104	1338	6.30447522647622	6.9908856175845	7.37527299237272	7.53193547404584	8.16316906222888	6.6967066852732	8.00996474141952	9.16549542464027	7.71480077760254	8.91275259682166	9.20494352829954
ENSMUSG00000045790	176.032529335363	221.360632507737	205.225684880171	177.865032891125	166.072571840013	248.245014835392	256.960337897926	283.958500779835	276.873908523111	258.406380460942	220.026786713341	287.068895132499	199.133577714967	263.882468251276	-0.405192114760718	0.00216490216722197	0.13066334435647	Ccdc149	5	52531993	52628863	-	3328	protein_coding	coiled-coil domain containing 149 [Source:MGI Symbol;Acc:MGI:2685293]	-	170	201	223	169	122	215	256	296	320	308	247	330	2.05909663323316	2.67088448639418	2.4509314566989	2.10263418584526	1.91631167771055	2.93792386031327	2.98105251771644	3.35442822362382	3.28323011711683	3.02836600470374	2.57182391010192
ENSMUSG00000028266	2537.97487882927	2276.38023578852	2506.8823570116	2079.65269226546	1702.92448665456	2059.85630914576	3233.08300144227	3447.79341825245	2753.16492787669	2891.13112684547	2720.49314422083	2238.26747629067	2193.94515994919	2880.6555158214	-0.392317652464166	0.00223479431633044	0.132933956498833	Lmo4	3	143894291	143910981	-	3530	protein_coding	LIM domain only 4 [Source:MGI Symbol;Acc:MGI:109360]	-	2451	2067	2724	1976	1251	1784	3221	3594	3182	3446	3054	2573	27.9885068860612	25.8945362150689	28.2255243265579	23.1778191047056	18.5255980693338	22.9829376416189	35.3613631938642	38.3984308617477	30.7793987591286	31.9434287842168	29.9793299044509
ENSMUSG00000110279	38.3129622671085	26.4311202994313	23.0073637758039	16.839293054781	24.5025105993462	38.1027232072927	89.333867472326	43.16936667261	38.0701624219278	34.398251944476	51.6662090258049	66.1128364547574	27.8659955339606	53.7917823319837	-0.946990617543675	0.00225463119060617	0.133211124798016	Gm45552	7	44771341	44773568	+	778	lncRNA	predicted gene 45552 [Source:MGI Symbol;Acc:MGI:5791388]	-	37	24	25	16	18	33	89	45	44	41	58	76	1.91704916853016	1.36418732620494	1.17535763310171	0.851531503383646	1.20943502403781	1.92894452104409	4.433261906167	2.18143876697832	1.93111324112168	1.72442862405191	2.58330682026744
ENSMUSG00000050373	430.761954138301	498.887395651766	497.879352108397	478.867396245336	569.002746140372	484.943749910998	715.674691098522	643.703223051585	571.917667293052	515.134797412397	642.264425993195	610.67383146368	493.390432365862	616.561439385405	-0.322085966968795	0.00234032164923727	0.137088439681483	Snx21	2	164627743	164635736	+	4760	protein_coding	sorting nexin family member 21 [Source:MGI Symbol;Acc:MGI:1917729]	-	416	453	541	455	418	420	713	671	661	614	721	702	3.52287718201481	4.20856089043864	4.15719056350626	3.95789964394402	4.59048911714742	4.01261721222541	5.8049108795617	5.31649827747818	4.74164645317394	4.22087394076966	5.24875022148355
ENSMUSG00000039154	6.21291280007164	7.7090767540008	3.68117820412863	5.26227907961908	0	3.4638839279357	13.0487671588791	19.1863851878267	5.19138578480834	30.2033431707594	26.7239012202439	5.21943445695453	4.38822179429264	16.5955361632453	-1.89896704432857	0.00235455655943798	0.137088439681483	Shd	17	56277467	56283625	+	2574	protein_coding	src homology 2 domain-containing transforming protein D [Source:MGI Symbol;Acc:MGI:1099461]	-	6	7	4	5	0	3	13	20	6	36	30	6	0.0939623419086791	0.120262952902617	0.0568409161493789	0.0804306902720081	0	0.0530027137589991	0.19572567035512	0.293043142658919	0.0795934573846505	0.457651533178369	0.403868801978954
ENSMUSG00000048424	40.3839332004657	72.6855808234361	63.5003240212189	43.1506884528764	66.7012788537757	80.8239583184997	69.2588410740505	121.833545942699	126.32372076367	77.1863214363852	89.9704674414878	113.957652310174	61.2076272783787	99.7550914947444	-0.708535201377005	0.00236628180736927	0.137286004718392	Ranbp3l	15	8997433	9067417	+	6890	protein_coding	RAN binding protein 3-like [Source:MGI Symbol;Acc:MGI:2444654]	-	39	66	69	41	49	70	69	127	146	92	101	131	0.228168932144283	0.423610854051591	0.366302168128686	0.246391073067231	0.371763280006203	0.462023655785993	0.388099290042329	0.695175742009546	0.72354958052688	0.436927690166518	0.507960270564474
ENSMUSG00000079507	1.03548546667861	2.20259335828594	2.76088365309647	3.15736744777145	4.08375176655769	2.30925595195713	1.00375131991378	10.5525118533047	6.05661674894306	56.2117775678023	5.34478024404878	7.8291516854318	2.59155627405788	14.4997649032407	-2.50114716015379	0.00253305369904259	1	H2-Q1	17	35539381	35544075	+	2860	protein_coding	histocompatibility 2, Q region locus 1 [Source:MGI Symbol;Acc:MGI:95928]	-	1	2	3	3	3	2	1	11	7	67	6	9	0.0140943512863019	0.0309247593178159	0.0383676184008308	0.0434325727468844	0.0548333594814344	0.0318016282553995	0.0135502387168929	0.145056355616165	0.0835731302538831	0.766566318073768	0.0726963843562118
ENSMUSG00000001661	353.100544137405	562.762603042058	418.734020719632	298.897451722364	541.777734363321	479.170610031105	705.637177899384	700.303059355674	725.928778909033	466.473855637285	599.506184040805	584.576659178907	442.407160669314	630.404285836848	-0.5119104565115	0.00256329700523252	0.143722023001609	Hoxc6	15	102906689	102920313	+	2408	protein_coding	homeobox C6 [Source:MGI Symbol;Acc:MGI:96197]	Homeobox	341	511	455	284	398	415	703	730	839	556	673	672	5.70832933367058	9.38440588717093	6.91137622162252	4.88339879401016	8.64004933977397	7.8374901528932	11.3138866110509	11.4334286943306	11.897073384516	7.55543149915817	9.68470007483038
ENSMUSG00000024901	120.116314134718	116.737447989155	117.797702532116	124.18978627901	136.125058885256	176.658080324721	153.573951946808	153.491081502613	195.542197894447	171.99125972238	205.774039395878	207.03756679253	131.937398357496	181.235016209109	-0.462029976535061	0.00263222180824674	0.145053908810975	Peli3	19	4979745	4993155	-	4720	protein_coding	pellino 3 [Source:MGI Symbol;Acc:MGI:1924963]	-	116	106	128	118	100	153	153	160	226	205	231	238	0.990665674310065	0.993130300295451	0.991922157074585	1.03514298380074	1.10750994432841	1.47412674703366	1.25621047833432	1.27846279526112	1.63493730238801	1.42119223465295	1.69588959353019
ENSMUSG00000002227	477.358800138838	598.004096774633	558.61879247652	482.024763693107	431.516436666263	529.974240974162	678.535892261712	682.075993427238	585.761362719208	633.431224831205	577.236266357268	656.778835833445	512.916188453921	635.636595905013	-0.307693680810844	0.00266067766154809	0.14613328609776	Mov10	3	104702152	104725879	-	5607	protein_coding	Mov10 RISC complex RNA helicase [Source:MGI Symbol;Acc:MGI:97054]	-	461	543	607	458	317	459	676	711	677	755	648	755	3.31422122292448	4.28264069247206	3.95974988979313	3.38216862194215	2.95541408792926	3.72278129801972	4.67228277611773	4.78243586574002	4.12280481694243	4.40613053144307	4.0047189584353
ENSMUSG00000086670	0	3.30389003742891	0	1.05245581592382	1.36125058885256	2.30925595195713	5.01875659956888	10.5525118533047	6.05661674894306	11.7457445664064	0.890796707341463	15.6583033708636	1.3378087323604	8.32045497440468	-2.67800132639862	0.0027908358642762	1	Gm13194	2	4946985	4947295	+	311	processed_pseudogene	predicted gene 13194 [Source:MGI Symbol;Acc:MGI:3651272]	-	0	3	0	1	1	2	5	11	7	14	1	18	0	0.426582692840611	0	0.133137361260546	0.168085110521868	0.292452272702388	0.623049561580607	1.33395876868885	0.768550329665934	1.47301988653231	0.111421039259789
ENSMUSG00000029561	516.707247872625	473.557572031478	512.604064924912	457.81827992686	559.473992018404	476.861354079148	559.089485191973	664.808246758194	794.282025075676	672.024385549397	524.679260624122	595.015528092816	499.503751808904	634.983155215363	-0.347185822808935	0.0029260307630578	0.153330247262539	Oasl2	5	115034997	115050295	+	6374	protein_coding	2'-5' oligoadenylate synthetase-like 2 [Source:MGI Symbol;Acc:MGI:1344390]	-	499	430	557	435	411	413	557	693	918	801	589	684	3.15572834871868	2.98331259876451	3.19633843033634	2.82577469691449	3.37069452651642	2.9466149405956	3.3865392658903	4.10044778081591	4.91773683309348	4.11207872331738	3.20207005813756
ENSMUSG00000105224	4.14194186671443	6.60778007485783	4.60147275516079	5.26227907961908	1.36125058885256	3.4638839279357	9.03376187922398	21.1050237066093	10.3827715696167	13.4237080758931	19.5975275615122	5.21943445695453	4.23976804885673	13.1270378749683	-1.6082335405221	0.00292927736196472	1	Gm3364	5	44858218	44864232	-	1217	lncRNA	predicted gene 3364 [Source:MGI Symbol;Acc:MGI:3781542]	-	4	6	5	5	1	3	9	22	12	16	22	6	0.132489218336313	0.218023364787888	0.150275799269208	0.170113883944247	0.0429535491966317	0.112102699437686	0.286592559221712	0.681776790570636	0.336686210859639	0.430199962166026	0.626411463118714
ENSMUSG00000031365	452.507148938551	416.290144716043	349.71192939222	390.461107707735	450.573944910199	496.490029670784	696.60341602016	514.195123033755	516.54288558843	475.702654939461	533.587227697537	559.34939263696	426.005717555922	549.330116652717	-0.367530866643656	0.00292976787024731	0.153330247262539	Zfp275	X	72386227	72402686	+	6745	protein_coding	zinc finger protein 275 [Source:MGI Symbol;Acc:MGI:1350985]	zf-C2H2	437	378	380	371	331	430	694	536	597	567	599	643	2.61162373975475	2.47829049690915	2.06068335448593	2.2774680325579	2.56528530203581	2.89915807475836	3.98740634764088	2.99704280484341	3.02222670884433	2.75069265838661	3.07731860380531
ENSMUSG00000015312	207.097093335721	331.490300422034	309.218969146805	261.009042349106	333.506394268878	244.781130907456	486.819390158181	344.395614121489	384.162548075817	393.482442974616	448.070743792756	290.548518103802	281.183821738334	391.24654287111	-0.477114930699077	0.00293129986573405	0.153330247262539	Gadd45b	10	80765907	80768038	+	1589	protein_coding	growth arrest and DNA-damage-inducible 45 beta [Source:MGI Symbol;Acc:MGI:107776]	-	200	301	336	248	245	212	485	359	444	469	503	334	5.07361166505014	8.37693149979074	7.73437100450227	6.46231491460251	8.05994021158823	6.067326382572	11.8285312298314	8.52080568484131	9.54099646872164	9.65806021890298	10.9691173282105
ENSMUSG00000034059	82.8388373342886	83.6985476148658	92.9497496542479	126.294697910858	58.5337753206603	108.535029741985	127.476417629049	151.572442983831	115.075718229918	118.296427418808	173.705357931585	137.445107366469	92.1417729294843	137.26191192661	-0.570254285170744	0.00295780622159851	0.154157551852595	Ypel4	2	84564402	84568999	+	2614	protein_coding	yippee like 4 [Source:MGI Symbol;Acc:MGI:3605071]	-	80	76	101	120	43	94	127	158	133	141	195	158	1.23366012789054	1.28573176842396	1.41327088131395	1.9007981339876	0.85990902180908	1.63533851189395	1.88283003318663	2.27961556568939	1.73732360290589	1.76503975965483	2.58497663577272
ENSMUSG00000082044	12.4258256001433	8.81037343314377	17.485596469611	21.0491163184763	17.6962576550833	20.7833035676142	22.0825290381031	27.8202585223487	25.091697959907	37.7541789634493	36.522665001	35.666135455856	16.3750788406787	30.822910823444	-0.917725178831424	0.00297670307760132	0.154236278646657	Snrpert	2	131164008	131164286	-	279	processed_pseudogene	small nuclear ribonucleoprotein E, pseudogene [Source:MGI Symbol;Acc:MGI:3650419]	-	12	8	19	20	13	18	22	29	29	45	41	41	1.7337567603795	1.2680259734617	2.49091563190101	2.96815192487669	2.43572796358391	2.9339566713046	3.05584595006058	3.92016100840819	3.54918352445318	5.27775558423442	5.0922210451669
ENSMUSG00000038451	117.009857734683	147.573755005158	159.210957328563	116.822595567544	129.318805940994	169.730312468849	184.690242864135	202.416363731571	160.932959329059	195.482748855193	187.958105249049	183.550111736234	139.944380674298	185.838421960873	-0.408023274650258	0.0030140900995543	0.15451822944692	Spsb2	6	124785624	124787582	+	1658	protein_coding	splA/ryanodine receptor domain and SOCS box containing 2 [Source:MGI Symbol;Acc:MGI:1315199]	-	113	134	173	111	95	147	184	211	186	233	211	211	2.74729339487759	3.5740665744752	3.81655211748352	2.77203549341092	2.99521989768913	4.03197845329766	4.30077058044495	4.79963309354814	3.83056715232256	4.59845941917071	4.40986732042617
ENSMUSG00000037921	171.890587468649	144.269864967729	126.080353491406	162.078195652268	151.098815362635	163.957172588957	181.678988904393	203.375682990963	175.641885719349	230.719982554412	191.521292078415	213.12690699231	153.22916492194	199.34412320664	-0.381805963016455	0.00302326536676219	0.15451822944692	Ddx60	8	62381121	62491278	+	8684	protein_coding	DExD/H box helicase 60 [Source:MGI Symbol;Acc:MGI:2384570]	-	166	131	137	154	111	142	181	212	203	275	215	245	0.770547468526563	0.667104463727136	0.577045917465589	0.734279223884453	0.668178961345623	0.743624900223563	0.807740278004006	0.920716987743323	0.79819845961044	1.0362244669645	0.857918907197809
ENSMUSG00000068246	34.171020400394	39.646680449147	34.0508983881898	27.3638512140192	49.0050211986923	30.0203273754427	56.2100739151714	58.5184748228713	70.0837080949126	99.8388288144548	40.9766485377073	44.3651928841135	35.7096331709809	61.6654878448718	-0.796301699793041	0.00302745531139906	0.15451822944692	Apol9b	15	77613239	77620582	+	1821	protein_coding	apolipoprotein L 9b [Source:MGI Symbol;Acc:MGI:1919148]	-	33	36	37	26	36	26	56	61	81	119	46	51	0.730491419220851	0.874248550072027	0.74319263759398	0.59118544928763	1.03343267292852	0.649305073331001	1.19176619049839	1.26336836906775	1.51883198828074	2.13834600222304	0.875337390252904
ENSMUSG00000023951	2586.64269576316	3610.05051423066	2927.45696683329	2852.15526115354	4647.30951034266	2987.02257385655	5195.4168318737	4757.26420732162	3884.02179800077	3298.03727789598	5383.97529917181	4751.42516731427	3268.43958702998	4545.02343026303	-0.475918030836418	0.00303929948388457	0.15451822944692	Vegfa	17	46327919	46343295	-	4285	protein_coding	vascular endothelial growth factor A [Source:MGI Symbol;Acc:MGI:103178]	-	2498	3278	3181	2710	3414	2587	5176	4959	4489	3931	6044	5462	23.4991813320188	33.8298824486895	27.1532903322055	26.1865809670947	41.6487837659358	27.4556036369446	46.8119164088924	43.6468988448416	35.771194388721	30.0187898833321	48.876626548424
ENSMUSG00000002325	761.081818008777	605.713173528634	705.865920641665	675.676633823089	703.766554436776	698.549925467033	698.610918659988	940.132874203507	834.082649425873	819.685174384221	856.055635755146	901.222349567482	691.775670984329	841.631600332703	-0.283014377309802	0.00304200345277405	0.15451822944692	Irf9	14	55841028	55847487	+	5386	protein_coding	interferon regulatory factor 9 [Source:MGI Symbol;Acc:MGI:107587]	IRF	735	550	767	642	517	605	696	980	964	977	961	1036	5.50087928684277	4.51584166421504	5.20881142941146	4.93547564500615	5.01780554502033	5.10827677035998	5.00790255854036	6.86230215577402	6.11146525476541	5.93566221239167	6.18279194664172
ENSMUSG00000069515	163.60670373522	320.477333630605	375.48017682112	249.432028373944	431.516436666263	609.643571316683	585.187019509731	815.421370482634	616.044446463923	599.871954641472	339.393545497098	763.777242201013	358.359375090639	619.949263132645	-0.791549262066906	0.00310023872599722	0.155282379327128	Lyz1	10	117123702	117128773	-	1263	protein_coding	lysozyme 1 [Source:MGI Symbol;Acc:MGI:96902]	-	158	291	408	237	317	528	583	850	712	715	381	878	5.04272007858598	10.1890103681098	11.815889828335	7.76971930833813	13.1203537537762	19.0114817085961	17.8886754012454	25.3819909668824	19.2491388529111	18.524378863746	10.4531990205318
ENSMUSG00000024155	14.4967965335005	13.2155601497157	14.7247128165145	15.7868372388572	16.3350070662308	13.8555357117428	36.1350475168959	41.2507281538273	16.4393883185597	18.457598604353	35.6318682936585	26.9670780275984	14.7357415860936	29.1469514858155	-0.980597861591684	0.00313894377768679	0.155282379327128	Meiob	17	25023263	25058762	+	1801	protein_coding	meiosis specific with OB domains [Source:MGI Symbol;Acc:MGI:1922428]	-	14	12	16	15	12	12	36	43	19	22	40	31	0.313346932539437	0.294652343083687	0.324949512867299	0.344856074558827	0.348302960837096	0.303007185376266	0.774643297218931	0.900460886057038	0.360225580867455	0.399714526201874	0.769615618207536
ENSMUSG00000039989	747.620506941955	755.489521892078	703.105036988568	587.270345285489	634.342774405295	718.178601058669	1207.51283785627	942.05151272229	848.791575816163	832.269900705371	860.509619291854	715.932426345596	691.001131095342	901.177978789591	-0.382264781132843	0.00314158654331639	0.155282379327128	Cbx4	11	118968399	118977047	-	5210	protein_coding	chromobox 4 [Source:MGI Symbol;Acc:MGI:1195985]	-	722	686	764	558	466	622	1203	982	981	992	966	823	5.58612434896554	5.82275823331881	5.3637095912061	4.43462406879705	4.67560513003689	5.42922769060415	8.94830716402446	7.10859668251809	6.4293333871157	6.23038540216417	6.42490924005015
ENSMUSG00000020181	260.942337603009	246.690456128026	161.051546430628	239.95992603063	208.271340094442	220.533943411906	415.553046444303	364.541318568707	269.086829845899	279.380924329525	291.290523300659	250.532853933817	222.908258283107	311.730916070485	-0.483096820503891	0.00314895087285832	0.155282379327128	Nav3	10	109517120	110292065	-	16536	protein_coding	neuron navigator 3 [Source:MGI Symbol;Acc:MGI:2183703]	-	252	224	175	228	153	191	414	380	311	333	327	288	0.614300971157685	0.599045652194169	0.387094682503141	0.570906144911877	0.483671614293785	0.525276894375742	0.970248225105823	0.866688917203502	0.642191551209645	0.658953445767439	0.685243434301085
ENSMUSG00000061983	2831.01726589931	2113.38832727536	2151.64866031318	2320.66507411201	1731.51074902046	1992.88788653901	2528.4495748628	3011.3031552294	2602.61474011725	3334.95247510469	3107.09891520702	2464.44296942536	2190.18632719322	2841.47697165775	-0.375267867589884	0.0032024907857153	0.156116688391216	Rps12	10	23661081	23663173	-	2027	protein_coding	ribosomal protein S12 [Source:MGI Symbol;Acc:MGI:98105]	-	2734	1919	2338	2205	1272	1726	2519	3139	3008	3975	3488	2833	54.3695685011855	41.8662046261326	42.1891114304337	45.0417420676989	32.8037124033383	38.7233067722802	48.1601020215394	58.404683804922	50.6709148494274	64.1688635290859	59.6280108119203
ENSMUSG00000006418	964.036969477783	1006.58516473668	972.751340440991	1106.13106253593	1097.16797461517	907.537589119154	1149.29526130127	1147.34583423204	1220.84089039409	1250.92179632229	1246.22459357071	1098.69095318893	1009.03501682095	1185.55322150155	-0.233320990611149	0.00321921599790658	0.156469091438073	Rnf114	2	167334565	167358093	+	3356	protein_coding	ring finger protein 114 [Source:MGI Symbol;Acc:MGI:1933159]	-	931	914	1057	1051	806	786	1145	1196	1411	1491	1399	1263	11.1824986281241	12.0438852573217	11.520269942201	12.9670473894468	12.554595445195	10.6508921711871	13.2219805501219	13.440621079381	14.3562073988734	14.5377318747854	14.4451932510436
ENSMUSG00000042379	6.21291280007164	16.5194501871446	26.6885419799326	1.05245581592382	16.3350070662308	20.7833035676142	45.1688093961199	117.036949645743	53.6443197763528	17.6186168496097	17.8159341468293	28.7068895132499	14.5986119028196	46.6652532213174	-1.6743254065091	0.00324458348152401	0.157056050557946	Esm1	13	113346193	113354632	+	2097	protein_coding	endothelial cell-specific molecule 1 [Source:MGI Symbol;Acc:MGI:1918940]	-	6	15	29	1	12	18	45	122	62	21	20	33	0.115335750154001	0.316326221920434	0.505835363243507	0.0197452166676346	0.299138594405155	0.39035475025941	0.831624092925188	2.1941762518573	1.00955020482448	0.327688973327287	0.330490636240289
ENSMUSG00000029817	1178.38246108026	1172.88096328726	1189.94085448458	1280.83872797928	1176.12050876862	1093.4326932517	1278.77918157015	1438.978889087	1343.70368730123	1305.4556103806	1445.7630560152	1353.57333583687	1181.93270147528	1361.04229336517	-0.203270412960629	0.00325218745930703	0.157056050557946	Tra2a	6	49220858	49240967	-	6945	protein_coding	transformer 2 alpha [Source:MGI Symbol;Acc:MGI:1933972]	-	1138	1065	1293	1217	864	947	1274	1500	1553	1556	1623	1556	6.60512645709157	6.78140564479016	6.80982411777798	7.25568904988052	6.50326012061453	6.20101987037358	7.10902689682069	8.14571327434188	7.63543646761374	7.33125466842711	8.09792711727806
ENSMUSG00000041841	1401.01183641616	1393.14029911586	1243.31793844444	1242.95031860603	1068.58171224926	1200.81309501771	1083.04767418696	1704.7103239384	1856.78564903312	2133.53060231226	1765.55907395078	1586.70807491418	1258.30253330824	1688.39023305595	-0.424139163648997	0.00327991118690039	0.157123588462466	Rpl37	15	5146127	5148622	+	1684	protein_coding	ribosomal protein L37 [Source:MGI Symbol;Acc:MGI:1914531]	-	1353	1265	1351	1181	785	1040	1079	1777	2146	2543	1982	1824	32.3867101249691	33.2193250403581	29.3442410994129	29.0380965289473	24.3678494401759	28.0851434331533	24.8308929133067	39.7974687777795	43.5133272243826	49.413456766265	40.7839379108149
ENSMUSG00000092035	294.077872536724	292.94491665203	262.283947044165	188.389591050363	261.360113059692	214.760803532013	465.740612439992	320.412632636705	392.814857717164	474.863673184718	285.94574305661	256.622194133598	252.302873979165	366.066618861464	-0.536707458283668	0.00328036137835093	0.157123588462466	Peg10	6	4747306	4760517	+	6667	protein_coding	paternally expressed 10 [Source:MGI Symbol;Acc:MGI:2157785]	-	284	266	285	179	192	186	464	334	454	566	321	295	1.71711352764149	1.76438577310796	1.56359410822045	1.11168798020299	1.50542944644994	1.26872612619936	2.69712146195674	1.88940961777528	2.32519863821492	2.77796608612501	1.66840764516934
ENSMUSG00000020160	92.1582065343961	123.345228064013	96.6309278583766	163.130651468191	119.790051819026	133.936845213514	143.53643874767	148.694485205657	161.798190293193	192.12682183622	287.727336471293	174.851054307977	121.498651826253	184.789054477001	-0.606946167688799	0.00329051694522113	0.157153181757706	Meis1	11	18829817	18968985	-	10532	protein_coding	Meis homeobox 1 [Source:MGI Symbol;Acc:MGI:104717]	Homeobox	89	112	105	155	88	116	143	155	187	229	323	201	0.340635793430999	0.470272450848974	0.364659950809263	0.609370157573549	0.43677870345257	0.500878664546683	0.526184640185612	0.555048531269603	0.606269078215801	0.711484749192558	1.06272100804819
ENSMUSG00000030208	5615.43768579809	8177.12784263656	8250.44065000329	4589.75981324376	4466.26318202527	6201.50685898088	7771.04271877245	9356.24073684368	10220.1081483594	6955.99772857685	9141.3558107381	8987.8661348757	6216.75600544797	8738.76854636102	-0.491161053209458	0.00333297814177815	0.15786966172791	Emp1	6	135339543	135360171	+	5935	protein_coding	epithelial membrane protein 1 [Source:MGI Symbol;Acc:MGI:107941]	-	5423	7425	8965	4361	3281	5371	7742	9753	11812	8291	10262	10332	36.8323989373646	55.3245767896781	55.2508789124101	30.4246574716431	28.8984893025306	41.1547362871851	50.5528242119779	61.9765805297993	67.9574974037395	45.7116771024604	59.9154576611473
ENSMUSG00000054200	196.742238668935	243.386566090597	311.059558248869	241.012381846554	315.810136613795	206.678407700164	360.346723849045	404.832727463143	372.049314577931	316.296121538231	318.905221228244	284.459177904022	252.448214861486	342.814881093436	-0.441708898513118	0.00334296398718707	0.15786966172791	Ffar4	19	38085519	38102711	+	1401	protein_coding	free fatty acid receptor 4 [Source:MGI Symbol;Acc:MGI:2147577]	-	190	221	338	229	232	179	359	422	430	377	358	327	5.46671697999745	6.97583989094172	8.82446094592317	6.76795840943242	8.65644317942455	5.81032318667709	9.9304583156193	11.360159413423	10.4800892817605	8.80530043011387	8.85467214068976
ENSMUSG00000018659	340.674718537262	392.061617774898	402.168718801053	331.523582016002	344.396398979699	437.604002895877	432.616818882837	426.897070429143	450.785332314191	570.507593225456	440.944370134024	548.910523723051	374.738173167465	478.443618118117	-0.352797952668219	0.00343630897323769	0.159493135076162	Pnpo	11	96828651	96834812	-	2925	protein_coding	pyridoxine 5'-phosphate oxidase [Source:MGI Symbol;Acc:MGI:2144151]	-	329	356	437	315	253	379	431	445	521	680	495	631	4.53399620490013	5.38228255504742	5.46468567860129	4.45907746868013	4.52151820553576	5.89248836430046	5.71037171171461	5.73778473326164	6.08200139028576	7.60718548483155	5.86417500473442
ENSMUSG00000105504	382.094137204406	378.846057625182	405.849897005182	219.963265528077	336.228895446584	375.254092193034	713.667188458694	462.391883026623	431.750251103227	491.643308279584	383.933380864171	516.724011238499	349.706057500411	500.0183371618	-0.51497688588959	0.00347178450682739	0.159886878190078	Gbp5	3	142199739	142228105	+	6637	protein_coding	guanylate binding protein 5 [Source:MGI Symbol;Acc:MGI:2429943]	-	369	344	441	209	247	325	711	482	499	586	431	594	2.24112289987733	2.29207587820099	2.43039236523689	1.30387152999461	1.94542623699839	2.22688062855159	4.15155468152073	2.7389577347925	2.56722178933095	2.88912785726088	2.25026179349425
ENSMUSG00000003617	1544.94431628448	1603.48796483217	1645.4866572455	1742.86683116984	1479.67939008274	2007.89805022673	1949.28506327255	2115.29896695789	1694.98745873992	2269.44564658067	2051.50481700739	2530.55580588012	1670.72720164024	2101.84629307309	-0.331149177055512	0.00347390316150076	0.159886878190078	Cp	3	20011218	20063309	+	9566	protein_coding	ceruloplasmin [Source:MGI Symbol;Acc:MGI:88476]	-	1492	1456	1788	1656	1087	1739	1942	2205	1959	2705	2303	2909	6.28708846548238	6.73090349994126	6.83670370283505	7.16787280440742	5.94003221907704	8.26712681336816	7.86741081562506	8.69337326727445	6.99260057642604	9.25289973899178	8.34240280285974
ENSMUSG00000020894	1391.69246721605	1416.26752937786	1701.62462485846	1515.53637493029	1496.01439714897	1730.78733599187	1712.3997517729	1780.49654543032	1771.12778358378	1870.9293130776	1851.07555785556	2240.87719351914	1541.98712158725	1871.15102420655	-0.279139223117419	0.00349746603283656	0.160432854081556	Vamp2	11	68979316	68983210	+	3809	protein_coding	vesicle-associated membrane protein 2 [Source:MGI Symbol;Acc:MGI:1313277]	-	1344	1286	1849	1440	1099	1499	1706	1856	2047	2230	2078	2576	14.2232689021629	14.93043158054	17.7556084335494	15.6535142732798	15.0826048412073	17.8968275871427	17.357254591209	18.3771055306213	18.3502308525274	19.157324417859	18.9043680729726
ENSMUSG00000004263	161.535732801863	205.942478999736	215.348924941525	213.648530632535	167.433822428865	187.049732108528	262.982845817409	209.131598547311	280.33483237965	248.338599404022	270.802199031805	223.565775906219	191.826536985509	249.192641847736	-0.375144207154379	0.00350924414291303	0.160432854081556	Atn1	6	124719507	124733487	-	4600	protein_coding	atrophin 1 [Source:MGI Symbol;Acc:MGI:104725]	-	156	187	234	203	123	162	262	218	324	296	304	257	1.36702951519488	1.79773693242981	1.86066267670811	1.82725239749175	1.397773854955	1.60155765253171	2.20727497290048	1.78734657311396	2.40503743535584	2.10559501047543	2.29004146429945
ENSMUSG00000065952	0	0	0	0	0	0	0	6.71523481573934	0.865230964134723	4.19490877371659	6.23557695139024	5.21943445695453	0	3.8717309936559	-4.26453162696616	0.00357233613357472	1	Rps23rg1	8	3617990	3634939	+	2773	protein_coding	ribosomal protein S23, retrogene 1 [Source:MGI Symbol;Acc:MGI:3612471]	-	0	0	0	0	0	0	0	7	1	5	7	6	0	0	0	0	0	0	0	0.0952046762428491	0.0123135929383394	0.0590012344432986	0.0874733510524919
ENSMUSG00000038274	3786.77035164367	3638.68422788838	4034.57131172498	3713.06411857922	3099.56759081729	3645.16052016434	3839.34879867019	4793.71833917849	4214.54002630024	5106.88194112257	4597.40180658929	4047.67142136824	3652.96968680298	4433.2603888715	-0.27905263549267	0.00357895214686074	0.161174023274572	Fau	19	6107874	6109554	+	961	protein_coding	Finkel-Biskis-Reilly murine sarcoma virus (FBR-MuSV) ubiquitously expressed (fox derived) [Source:MGI Symbol;Acc:MGI:102547]	-	3657	3304	4384	3528	2277	3157	3825	4997	4871	6087	5161	4653	153.395527565512	152.040404624424	166.861743925783	152.007677288201	123.859486743735	149.395180827558	154.248529077471	196.108343749879	173.073032845943	207.26256929829	186.096440068417
ENSMUSG00000058246	11.3903401334647	30.8363070160032	14.7247128165145	21.0491163184763	25.8637611881987	31.1749553514213	40.150052796551	56.5998363040887	30.2830837447153	37.7541789634493	44.5398353670732	36.5360411986817	22.5065321373465	40.9771713957599	-0.874565345761212	0.00358373679151283	0.161174023274572	Gm10037	13	67979225	67992154	+	1193	protein_coding	predicted gene 10037 [Source:MGI Symbol;Acc:MGI:3645096]	-	11	28	16	20	19	27	40	59	35	45	50	42	0.371675013803065	1.03791061448898	0.490556640967314	0.694144498776694	0.832535555803617	1.02922117933024	1.29936907729468	1.8651839858776	1.00175671637094	1.23427812908751	1.45230273301736
ENSMUSG00000060938	4470.19075965155	3853.43708032126	3887.32418355983	4405.58004545709	3932.65295119506	3740.99464217056	4763.80376431078	5155.38169996903	4447.28715565248	4964.25504281621	5174.63807294656	4220.78266419056	4048.36327705922	4787.69139998094	-0.241864218143582	0.00360946862828896	0.161174023274572	Rpl26	11	68792409	68797815	+	1444	protein_coding	ribosomal protein L26 [Source:MGI Symbol;Acc:MGI:106022]	-	4317	3499	4224	4186	2889	3240	4746	5374	5140	5917	5809	4852	120.510802962937	107.156646800446	106.995703037353	120.030707207477	104.585139900677	102.038299191771	127.37186858592	140.359101330423	121.543178075206	134.083500491602	139.399680128598
ENSMUSG00000002475	101.477575734504	111.23096459344	106.75416791973	124.18978627901	129.318805940994	102.761889862092	136.510179508273	183.229978543745	137.571723297421	192.12682183622	139.85508305261	131.355767166689	112.622198388295	153.44159223416	-0.449052218705358	0.00364426845043227	0.161415621660679	Abhd3	18	10642092	10706771	-	2334	protein_coding	abhydrolase domain containing 3 [Source:MGI Symbol;Acc:MGI:2147183]	-	98	101	116	118	95	89	136	191	159	229	157	151	1.69252989654014	1.91365166592637	1.81788647253065	2.09334827915146	2.12770976451096	1.73410164013054	2.25814089602514	3.08633188513229	2.32611367680565	3.21052158461698	2.33091477460913
ENSMUSG00000071532	238.16165733608	230.171005940881	219.030103145654	209.438707368839	230.051349516083	199.750639844292	229.859052260255	269.568711888965	246.590824778396	348.177428218477	341.17513891178	297.507764046408	221.100577191971	288.813153350713	-0.386786877282901	0.00366155028414876	0.161480694828438	Gm10335	10	14398822	14399289	+	468	processed_pseudogene	predicted gene 10335 [Source:MGI Symbol;Acc:MGI:3641693]	-	230	209	238	199	169	173	229	281	285	415	383	342	19.8103937524132	19.7488949087941	18.6011898098843	17.6062781005426	18.8768917177753	16.8106940472292	18.9628062932518	22.644908848968	20.7937907417399	29.0163784577674	28.3583210456223
ENSMUSG00000030539	451.471663471873	438.316078298902	565.981148884777	440.978986872079	381.150164878718	526.510357046227	632.363331545678	676.32007787089	486.259801843714	549.533049356873	665.425140384073	602.844679778248	467.401399908763	602.12434679658	-0.363322368981881	0.00367786050922792	0.161480694828438	Sema4b	7	79836589	79876275	+	5645	protein_coding	sema domain, immunoglobulin domain (Ig), transmembrane domain (TM) and short cytoplasmic domain, (semaphorin) 4B [Source:MGI Symbol;Acc:MGI:107559]	-	436	398	615	419	280	456	630	705	562	655	747	693	3.11339101505172	3.11789504307205	3.98493085357079	3.07333860203729	2.59288776337365	3.67355283485933	4.32503456511916	4.71015588741241	3.39943726988919	3.79680521303383	4.58547415017118
ENSMUSG00000041660	35.2065058670727	28.6337136577172	49.6959057557365	76.8292745624385	19.0575082439359	115.462797597857	59.2213278749127	98.8098837173074	88.2535583417418	254.211471687225	143.418269881976	98.2993489393103	54.1476176141263	123.702310073746	-1.19129908331929	0.00372925287678631	0.162989123742196	Bbox1	2	110093042	110144905	-	4403	protein_coding	butyrobetaine (gamma), 2-oxoglutarate dioxygenase 1 (gamma-butyrobetaine hydroxylase) [Source:MGI Symbol;Acc:MGI:1891372]	-	34	26	54	73	14	100	59	103	102	303	161	113	0.311272931882806	0.261136168847693	0.448595274875032	0.686490463933267	0.166214529005726	1.03284870327552	0.519297588255397	0.882264184283648	0.791017603506141	2.25182640030497	1.26708218414192
ENSMUSG00000071847	2107.21292469097	3952.55378144412	4557.29861671124	2679.55250734203	3822.391653498	4563.0897610673	5411.22336565516	5213.9001747919	5442.30276440741	5157.22084640717	4201.88806852968	5279.45795320951	3613.68320745894	5117.66552883347	-0.50204384671388	0.00377096624674415	0.164376219173554	Apcdd1	18	63055302	63094250	+	12884	protein_coding	adenomatosis polyposis coli down-regulated 1 [Source:MGI Symbol;Acc:MGI:3513977]	-	2035	3589	4952	2546	2808	3952	5391	5435	6290	6147	4717	6069	6.36685298986382	12.3187064967438	14.0585179674484	8.18216093373703	11.3929455136154	13.9492742826323	16.2155466935052	15.9095883360139	16.6699612962834	15.6118173061931	12.686527174837
ENSMUSG00000120584	2.07097093335722	1.10129667914297	4.60147275516079	2.10491163184763	4.08375176655769	0	4.0150052796551	11.511831112696	7.78707867721251	5.0338905284599	23.160714390878	7.8291516854318	2.32706729434438	9.88961194572223	-2.08200609522454	0.00387073864992751	1	Gm26641	1	171250748	171264929	-	1002	lncRNA	predicted gene, 26641 [Source:NCBI gene (formerly Entrezgene);Acc:102638632]	-	2	1	5	2	3	0	4	12	9	6	26	9	0.0804587718140186	0.0441341375493779	0.182520606497631	0.0826461464112371	0.156510387342218	0	0.154705320280694	0.451672484553328	0.306696945071992	0.195940626480559	0.899152219016618
ENSMUSG00000049807	1534.5894616177	2164.04797451594	2201.34456606892	1561.84443083094	1437.48062182831	2063.3201930737	2861.69501307417	2630.45340925104	2532.53103202233	2136.88652933123	2202.94025725544	2099.95246318137	1827.10454132258	2410.7431173526	-0.399470879386143	0.00388118237792667	0.167906462263425	Arhgap23	11	97306359	97393228	+	6637	protein_coding	Rho GTPase activating protein 23 [Source:MGI Symbol;Acc:MGI:3697726]	-	1482	1965	2392	1484	1056	1787	2851	2742	2927	2547	2473	2414	9.00093262227154	13.0928171530958	13.1825363665457	9.2581117249378	8.31728787963683	12.244417486836	16.6470919789249	15.5813736697117	15.0586336219874	12.5573526492209	12.9115949311167
ENSMUSG00000101925	156.35830546847	174.004875304589	230.073637758039	134.714344438248	133.402557707551	182.431220204614	210.787777181893	211.050237066093	236.208053208779	258.406380460942	209.337226225244	251.402759676643	168.497490146919	229.532072303266	-0.442654094427917	0.00388252486025157	0.167906462263425	Gm28156	11	101230486	101238765	-	1136	lncRNA	predicted gene 28156 [Source:MGI Symbol;Acc:MGI:5578862]	-	151	158	250	128	98	158	210	220	273	308	235	289	5.35808674868162	6.15065151431982	8.04954435346068	4.66543316642589	4.50959330852595	6.32505271833183	7.16397303993476	7.30389396236324	8.20576315890679	8.87183280251236	7.16831571681484
ENSMUSG00000004110	315.823067336975	353.516234004894	395.726656943828	224.173088791773	181.046328317391	421.439211232177	450.684342641285	296.429651151922	469.820413525155	771.024232609109	416.892859035805	689.835254060824	315.287431104506	515.781125504017	-0.709416743857937	0.00395572972055953	0.16987748997248	Cacna1e	1	154266477	154760247	-	25228	protein_coding	calcium channel, voltage-dependent, R type, alpha 1E subunit [Source:MGI Symbol;Acc:MGI:106217]	-	305	321	430	213	133	365	449	309	543	919	468	793	0.487335604369792	0.562684012591447	0.623440847594494	0.349588481924146	0.275586825214682	0.657953855553582	0.689725842155972	0.461940209695684	0.734939635222062	1.19199285586851	0.642821841691126
ENSMUSG00000012428	5283.04685099425	6172.76788659635	7810.53985460992	5401.20324732102	5721.33622494733	9350.17734947444	10687.9440544419	9748.60231393473	10445.0681990344	9691.9172307948	6546.46500225241	8115.35067482147	6623.17856899055	9205.89124587995	-0.474999640631186	0.00395903114337758	0.16987748997248	Steap4	5	8010457	8032213	+	3155	protein_coding	STEAP family member 4 [Source:MGI Symbol;Acc:MGI:1923560]	-	5102	5605	8487	5132	4203	8098	10648	10162	12072	11552	7349	9329	65.1856822666741	78.5631013141654	98.393058137565	67.351553633793	69.6385403397085	116.724978581769	130.792143807411	121.475847321896	130.651537663353	119.811575770609	80.715413834795
ENSMUSG00000079388	0	2.20259335828594	0	0	0	0	0	12.4711503720873	3.46092385653889	5.87287228320322	8.01717036607317	2.60971722847726	0.367098893047657	5.40530568439665	-3.78283404790466	0.00398509405679642	1	2610042L04Rik	14	18115085	18135010	-	1886	protein_coding	RIKEN cDNA 2610042L04 gene [Source:MGI Symbol;Acc:MGI:1914305]	-	0	2	0	0	0	0	0	13	4	7	9	3	0	0.0468954462613751	0	0	0	0	0	0.259963139969585	0.0724190736331179	0.121449942924588	0.165359219983112
ENSMUSG00000055415	40.3839332004657	27.5324169785743	15.6450073675467	42.0982326369526	17.6962576550833	47.3397470151213	41.1538041164648	53.7218785259147	48.4529339915445	68.796503888952	64.1373629285854	66.9827421975831	31.7825991422906	57.2075376081741	-0.848445040104731	0.00401339978951656	0.170963815177859	Atp10b	11	43040704	43153112	+	9816	protein_coding	ATPase, class V, type 10B [Source:MGI Symbol;Acc:MGI:2442688]	-	39	25	17	40	13	41	41	56	56	82	72	77	0.160155250863296	0.112628376692331	0.0633466994922709	0.168727462722208	0.0692306542216698	0.189947989467611	0.161868479211783	0.215161016480375	0.194799635310599	0.273350747659411	0.254170732590178
ENSMUSG00000033355	286.829474269974	255.500829561169	223.631575900814	208.386251552915	349.841401335109	217.070059483971	345.290454050339	425.937751169752	398.006243501973	329.719829614124	269.020605617122	342.742862673347	256.876598683992	351.786291104443	-0.456130400658813	0.00401601723000842	0.170963815177859	Rtp4	16	23339041	23432972	+	2131	protein_coding	receptor transporter protein 4 [Source:MGI Symbol;Acc:MGI:1915025]	-	277	232	243	198	257	188	344	444	460	393	302	394	5.23971233037732	4.81445244076893	4.17092561179562	3.8471761763031	6.30433534898231	4.01198955428512	6.25587370212479	7.85795668340221	7.37070524649786	6.03462189420252	4.91078688379065
ENSMUSG00000020601	587.12025960677	621.131327036636	521.807010435233	625.158754658746	537.693982596763	600.406547508855	871.256145685157	796.234985294807	637.675220567291	663.634568001964	797.26305307061	612.413642949332	582.219646973834	729.746269261527	-0.325055719973748	0.0041149174717233	0.173405358520677	Trib2	12	15841728	15866923	-	4335	protein_coding	tribbles pseudokinase 2 [Source:MGI Symbol;Acc:MGI:2145021]	-	567	564	567	594	395	520	868	830	737	791	895	704	5.2723603074724	5.75350331834022	4.78413666675549	5.67358645792519	4.76318694395821	5.45506130812343	7.75967626526236	7.22102919076549	5.80514468320118	5.97074254583678	7.15420742162996
ENSMUSG00000044595	18.6387384002149	7.7090767540008	7.36235640825726	13.6819256070096	6.80625294426282	16.1647916636999	27.1012856376719	24.9423007441747	12.1132334978861	31.0423249255027	28.5054946349268	26.0971722847727	11.7271902962409	24.9669686208225	-1.08485693145292	0.00422083597340763	0.176514503385374	Dnd1	18	36896724	36899267	-	2412	protein_coding	DND microRNA-mediated repression inhibitor 1 [Source:MGI Symbol;Acc:MGI:2447763]	-	18	7	8	13	5	14	27	26	14	37	32	30	0.300819736409129	0.128340315411002	0.121317179244197	0.223165154053229	0.108363327886196	0.263958788421682	0.433809881309482	0.406542688211143	0.198191668761282	0.501955692795761	0.459727273098432
ENSMUSG00000046916	366.561855204227	299.552696726888	373.639587719056	254.694307453563	341.673897801994	290.966249946599	480.796882238698	455.676648210883	427.424096282553	414.456986843199	417.783655743146	320.125313359878	321.181432475388	419.377263779726	-0.383724984225887	0.00425228204436504	0.176572288460812	Myct1	10	5543775	5556904	+	2845	protein_coding	myc target 1 [Source:MGI Symbol;Acc:MGI:1915882]	-	354	272	406	242	251	252	479	475	494	494	469	368	5.01570650836677	4.22794178708529	5.21979423342808	3.52203306966299	4.61191276360194	4.0281317251725	6.52478524703701	6.29682246699346	5.92897119497344	5.68179606446157	5.71239415303815
ENSMUSG00000001270	833.565800676279	1101.29667914297	1237.79617113825	857.75148997791	779.99658741252	1249.30747000881	1423.31937163773	1453.36867797787	1384.36954261556	1199.74390928294	1204.35714832566	1287.46049938212	1009.95236639279	1325.43652487031	-0.391454453241418	0.00427830027553026	0.176572288460812	Ckb	12	111635795	111638772	-	2895	protein_coding	creatine kinase, brain [Source:MGI Symbol;Acc:MGI:88407]	-	805	1000	1345	815	573	1082	1418	1515	1600	1430	1352	1480	11.2087823718317	15.2754424264168	16.9935195972914	11.6565323909859	10.3465530052948	16.9966795628495	18.9819420074559	19.736683411816	18.8714850255006	16.1632404179006	16.1828764143841
ENSMUSG00000091183	38.3129622671085	30.8363070160032	34.0508983881898	39.993321005105	29.9475129547564	27.7110714234856	56.2100739151714	46.047324450784	37.2049314577931	53.6948323035723	72.1545332946585	53.0642503123711	33.4753455091081	53.0626576223917	-0.659500962829429	0.00428620203409245	0.176572288460812	Gm5141	13	62920014	62933622	-	3406	protein_coding	predicted gene 5141 [Source:MGI Symbol;Acc:MGI:3779466]	zf-C2H2	37	28	37	38	22	24	56	48	43	64	81	61	0.437893204085867	0.363542972133103	0.397344037891555	0.461954590539381	0.337650712328426	0.320443887764331	0.637171530504278	0.531504203784422	0.431080595529844	0.61486007510987	0.824077334114309
ENSMUSG00000043110	3.10645640003582	4.40518671657188	7.36235640825726	10.5245581592382	19.0575082439359	6.9277678558714	29.1087882774995	29.7388970411313	8.65230964134723	10.9067628116631	34.7410715863171	23.4874550562954	8.5639722973184	22.7725474023756	-1.4320655423752	0.00429118822786193	0.176572288460812	Lrrn4	2	132710225	132722811	-	3715	protein_coding	leucine rich repeat neuronal 4 [Source:MGI Symbol;Acc:MGI:2445154]	-	3	4	8	10	14	6	29	31	10	13	39	27	0.0325516915306783	0.0476149726239318	0.0787663624056535	0.111455502966433	0.196996654431282	0.0734476367244489	0.30251865388401	0.31471177019281	0.0919127677470123	0.114505275932515	0.363775446886131
ENSMUSG00000042138	296.148843470082	276.425466464886	277.008659860679	272.586056324268	236.857602460346	320.986577322042	281.050369575857	387.564980794099	337.440076012542	351.53335523745	369.680633546707	391.45758427159	280.002200983717	353.121166573041	-0.3340261318427	0.00429392744578376	0.176572288460812	Msantd2	9	37400317	37435921	+	3571	protein_coding	Myb/SANT-like DNA-binding domain containing 2 [Source:MGI Symbol;Acc:MGI:2384579]	-	286	251	301	259	174	278	280	404	390	419	415	450	3.22839976985256	3.10832368018584	3.08309044866416	3.00310313978597	2.54711780195473	3.54030223933114	3.03865336446033	4.26679350151834	3.72914627696048	3.8394156977665	4.02703904566358
ENSMUSG00000010362	215.38097706915	236.778786015739	244.798350574554	244.169749294325	311.726384847237	234.389479123649	390.459263446459	312.738078561575	286.391449128593	291.126668895931	277.928572690537	397.54692447137	247.873954487442	326.031826199077	-0.397248511352092	0.0043576345754346	0.177136294788091	Rdm1	11	101518021	101526926	+	1575	protein_coding	RAD52 motif 1 [Source:MGI Symbol;Acc:MGI:1913849]	-	208	215	266	232	229	203	389	326	331	347	312	457	5.32345885282238	6.03670936651587	6.1774707671145	6.09912818391804	7.60054189603612	5.86139343889518	9.57154449656638	7.80633441398486	7.1759945112146	7.20924658026789	6.86438494060687
ENSMUSG00000034459	150.145392668398	209.246369037164	237.435994166297	107.350493224229	176.962576550833	166.266428540914	295.10288805465	266.690754110791	285.526218164459	289.448705386445	186.176511834366	212.257001249484	174.567875697973	255.867013133366	-0.550425878594003	0.00436471054706348	0.177136294788091	Ifit1	19	34618271	34627409	+	2656	protein_coding	interferon-induced protein with tetratricopeptide repeats 1 [Source:MGI Symbol;Acc:MGI:99450]	-	145	190	258	102	130	144	294	278	330	345	209	244	2.20065040603516	3.16350041666061	3.55304948112513	1.59012928234452	2.55861484126472	2.4655840701626	4.28975253114166	3.94754268973509	4.24248710916603	4.25042138353818	2.72675306131288
ENSMUSG00000053080	1124.53721681297	1432.78697956501	1377.68094289514	965.101983202139	1161.14675229124	1325.5129164234	1679.27595821575	1570.40562762361	1335.91660862401	1406.97240270454	1547.31388065212	1754.59988327955	1231.12779853165	1549.08072684993	-0.331145950610499	0.00444452282697484	0.177923182413444	Zfta	19	7394990	7403269	+	7032	protein_coding	zinc finger translocation associated [Source:MGI Symbol;Acc:MGI:1919667]	zf-BED	1086	1301	1497	917	853	1148	1673	1637	1544	1677	1737	2017	6.22532584203671	8.18164817657056	7.78668414740637	5.39946596214609	6.3410299167481	7.42417875557367	9.21998168484285	8.77970507357113	7.49726904559375	7.80360294532408	8.55950303689031
ENSMUSG00000019817	1159.74372268004	1221.33801716955	1154.04936699433	998.780569311701	1216.95802643419	1145.39095217074	1950.28881459247	1462.96187057178	1809.19794600571	1207.29474507563	1348.66621491498	1203.94954807084	1149.37677579343	1497.05985653857	-0.38118301807162	0.00453569238745471	0.179650489105989	Plagl1	10	12936248	13007438	+	7819	protein_coding	pleiomorphic adenoma gene-like 1 [Source:MGI Symbol;Acc:MGI:1100874]	zf-C2H2	1120	1109	1254	949	894	992	1943	1525	2091	1439	1514	1384	5.77401535238293	6.27224044754376	5.86618754902483	5.02545436309966	5.97689929899436	5.76960196674504	9.63018359700724	7.35578015114586	9.13140240681283	6.02213579376169	6.70968691899585
ENSMUSG00000057346	23.816165733608	26.4311202994313	11.0435346123859	22.1015721344001	32.6700141324616	8.08239583184997	37.1387988368097	70.9896251949587	46.7224720632751	53.6948323035723	22.2699176835366	28.7068895132499	20.6908004573561	43.253755932567	-1.07293314916578	0.00467954776506031	0.183583115535473	Apol9a	15	77287989	77295335	-	5953	protein_coding	apolipoprotein L 9a [Source:MGI Symbol;Acc:MGI:3606001]	-	23	24	12	21	24	7	37	74	54	64	25	33	0.155741042770525	0.178286198519644	0.0737318250471198	0.146064187198492	0.210748742639882	0.0534746008460522	0.240867841596104	0.468819802125822	0.30973660906649	0.351791267566641	0.145523027086319
ENSMUSG00000120623	411.087730271407	472.456275352335	341.42927843293	526.227907961908	258.637611881987	474.552098127191	442.654332081975	601.493175638366	527.790888122181	602.388899905702	681.45948111622	596.755339578468	414.06515033796	575.423686073819	-0.474048486450708	0.00490260227172749	0.189504645844962	ENSMUSG00000120623	18	61778949	61779750	-	802	lncRNA	novel transcript	-	397	429	371	500	190	411	441	627	610	718	765	686	19.9538757325347	23.6551273051128	16.9203429677413	25.8140394962779	12.3842259111436	23.3052007163914	21.3096933716563	29.4851460006823	25.9710871109591	29.2948338638129	33.0532874756766
ENSMUSG00000068551	640.965503874058	791.832312303796	691.14120782515	595.689991812879	961.042915729911	705.477693322905	1250.67414461256	941.092193462898	850.522037744433	759.278488042702	976.313191246244	1044.75679713373	731.024937478116	970.439475373762	-0.409490527654029	0.0050872661958387	0.19403445627045	Zfp467	6	48404631	48422759	-	4255	protein_coding	zinc finger protein 467 [Source:MGI Symbol;Acc:MGI:1916160]	zf-C2H2	619	719	751	566	706	611	1246	981	983	905	1096	1201	5.86411136455738	7.47259924507609	6.4557988921589	5.50778781509961	8.67350772663793	6.53020837969217	11.3483169640355	8.69519954487875	7.88839439090689	6.95969132388703	8.92562391490824
ENSMUSG00000040483	384.165108137763	403.074584566327	388.364300535571	343.100595991164	475.076455509545	326.759717201935	445.665586041716	513.235803774363	431.750251103227	497.516180562787	462.32349111022	526.292974409582	386.756793657051	479.464047833649	-0.311966229347989	0.00511863391943507	0.194102042761823	Xaf1	11	72192455	72204559	+	4689	protein_coding	XIAP associated factor 1 [Source:MGI Symbol;Acc:MGI:3772572]	-	371	366	422	326	349	283	444	535	499	593	519	605	3.18936924202249	3.45178087689453	3.29186365254359	2.87870857512512	3.89076344869545	2.74467923622896	3.66957456435473	4.3031220017506	3.63374941688836	4.13823761590878	3.83543581272835
ENSMUSG00000113948	1607.0734442852	1242.26265407327	1341.78945540489	1417.65798404938	1064.49796048271	1228.5241664412	1567.85956170532	1690.32053504753	1416.38308828854	1789.5480828675	1935.701245053	1516.24570974529	1316.96761078944	1652.6763704512	-0.326920302350071	0.00512437874621552	0.194102042761823	Rpl17-ps3	12	67557530	67558085	+	556	processed_pseudogene	ribosomal protein L17, pseudogene 3 [Source:MGI Symbol;Acc:MGI:3642206]	-	1552	1128	1458	1347	782	1064	1562	1762	1637	2133	2173	1743	112.519566441608	89.717398866924	95.9162857417603	100.312057494935	73.5227249085238	87.0266428474018	108.872756159622	119.520175602298	100.532978593329	125.532745502278	135.429267256984
ENSMUSG00000015013	343.781174937298	377.744760946039	369.958409514927	347.310419254859	336.228895446584	416.820699328263	458.714353200595	418.263197094621	408.389015071589	453.050147561391	448.070743792756	423.644096756143	365.307393237995	435.021925579516	-0.251369301527884	0.00522795745626852	0.196221082020356	Trappc2l	8	123338379	123343399	+	1950	protein_coding	trafficking protein particle complex 2-like [Source:MGI Symbol;Acc:MGI:1916295]	-	332	343	402	330	247	361	457	436	472	540	503	487	6.86300945300992	7.77860779374129	7.54051593637661	7.00712173649735	6.6214327871581	8.41895105347942	9.08227333730943	8.43260947315306	8.26498461482211	9.0615003569317	8.93842432539822
ENSMUSG00000109238	1.03548546667861	0	0	2.10491163184763	0	2.30925595195713	16.0600211186204	2.877957778174	6.92184771307779	4.19490877371659	6.23557695139024	1.73981148565151	0.908275508413895	6.33835397010509	-2.79313789916443	0.00523708855096194	1	Gm35060	18	32591136	32605642	-	975	protein_coding	predicted gene, 35060 [Source:MGI Symbol;Acc:MGI:5594219]	-	1	0	0	2	0	2	16	3	8	5	7	2	0.0413434304398188	0	0	0.0849348089272406	0	0.0932847762158385	0.635957870446174	0.116045084492932	0.28016896999397	0.167805562165402	0.248783182019036
ENSMUSG00000029335	1657.81223215245	2200.39076492766	3013.96465463032	1781.80769635902	1422.50686535093	2377.37900253987	2771.35739428193	2772.43265964095	2390.63315390424	2842.47018507036	2893.30770544507	3652.73421412535	2075.64353599337	2887.15588541132	-0.475731429763165	0.0052499573949039	0.196598972717799	Bmp3	5	99002274	99032255	+	7398	protein_coding	bone morphogenetic protein 3 [Source:MGI Symbol;Acc:MGI:88179]	-	1601	1998	3275	1693	1045	2059	2761	2890	2763	3388	3248	4199	8.72344705742041	11.9432774854426	16.1922275277724	9.47551809448316	7.38399844472213	12.6569018905583	14.4632222247089	14.733082672342	12.7526728928596	14.9854585969444	15.2135052102476
ENSMUSG00000035278	402.803846537978	430.607001544902	422.41519892376	415.720047289907	411.097677833475	387.954999928799	520.946935035249	435.530943763665	461.168103883807	578.897410772889	450.743133914781	562.829015608263	411.766462009803	501.685923829776	-0.285116384933016	0.00532280493855788	0.197750086982068	Plekhj1	10	80631933	80634460	-	1725	protein_coding	pleckstrin homology domain containing, family J member 1 [Source:MGI Symbol;Acc:MGI:1925920]	-	389	391	459	395	302	336	519	454	533	690	506	647	9.09016207539842	10.0237453202147	9.73269707816552	9.48130964872566	9.15182014517962	8.85799788066918	11.6598036736422	9.92605925619254	10.5504934406968	13.0888338489014	10.1645700082063
ENSMUSG00000025290	6122.82556447061	5341.28889384341	4665.89337373304	5167.55805618593	4931.81088341284	5378.25711210817	5008.71908636974	6547.35394534585	6421.74421580792	6997.94681631401	7120.13808178032	6433.82287393928	5267.93898062567	6421.62083659285	-0.285755218508106	0.00537677827926301	0.197810919087608	Rps24	14	24537193	24547027	+	6256	protein_coding	ribosomal protein S24 [Source:MGI Symbol;Acc:MGI:98147]	-	5913	4850	5070	4910	3623	4658	4990	6825	7422	8341	7993	7396	38.0997620821423	34.2836745921854	29.642910290693	32.497135872517	30.2734019398731	33.8600923451919	30.9112654770246	41.1449013812156	40.5096855601195	43.6277026589219	44.2731748842528
ENSMUSG00000044627	1181.48891748029	1312.74564153842	1118.15787950407	1205.06190923277	1466.06688419421	1340.52308011112	1384.1730701611	1424.58910019613	1571.25943086866	1722.42954248803	1585.6181390678	1439.69400437662	1270.67405201015	1521.29388119306	-0.261025384541219	0.00539821606446804	0.197810919087608	Swi5	2	32168828	32178087	-	5551	protein_coding	SWI5 recombination repair homolog (yeast) [Source:MGI Symbol;Acc:MGI:1920181]	-	1141	1192	1215	1145	1077	1161	1379	1485	1816	2053	1780	1655	8.28563011683254	9.49614623361128	8.00598313703518	8.54072215061685	10.1422452736386	9.51144249296737	9.62733354082195	10.0893999105389	11.1706714617034	12.1020428264252	11.1115941115896
ENSMUSG00000047094	0	0	5.52176730619295	0	1.36125058885256	3.4638839279357	11.0412645190515	21.1050237066093	1.73046192826945	5.0338905284599	10.6895604880976	9.56896317108331	1.72448363716354	9.86152739026185	-2.48240939199726	0.00548173842238472	1	Ofcc1	13	40155358	40514926	-	3575	protein_coding	orofacial cleft 1 candidate 1 [Source:MGI Symbol;Acc:MGI:2658851]	-	0	0	6	0	1	3	11	22	2	6	12	11	0	0	0.0613881894413292	0	0.0146222291950492	0.0381619539064794	0.119242100708658	0.232090168985864	0.0191024297723161	0.0549181839814043	0.116314214969939
ENSMUSG00000070604	150.145392668398	188.321732133448	188.660382961592	184.179767786668	230.051349516083	215.915431507992	276.031612976288	260.934838554443	262.164982132821	197.16071236468	244.969094518902	254.882382647946	192.87900942903	249.357270532513	-0.373047442037901	0.00553765353532629	0.200827220932953	Vsig10l	7	43112575	43121443	+	4075	protein_coding	V-set and immunoglobulin domain containing 10 like [Source:MGI Symbol;Acc:MGI:1922940]	-	145	171	205	175	169	187	275	272	303	235	275	293	1.43433803151641	1.85571322600872	1.84007645549342	1.77815972677429	2.16794731875309	2.08688918080402	2.61527920265921	2.51739520715956	2.53892386381805	1.88704046287842	2.33847469513949
ENSMUSG00000086328	7.24839826675025	6.60778007485783	11.0435346123859	5.26227907961908	6.80625294426282	5.77313987989284	10.0375131991378	19.1863851878267	13.8436954261556	29.3643614160161	7.12637365873171	26.9670780275984	7.12356414296145	17.754234485911	-1.31129136861855	0.00553861633819224	0.200827220932953	2700033N17Rik	2	115896675	115897931	-	751	lncRNA	RIKEN cDNA 2700033N17 gene [Source:MGI Symbol;Acc:MGI:1919853]	-	7	6	12	5	5	5	10	20	16	35	8	31	0.375724251333906	0.353308169037097	0.584454799607862	0.275670568255857	0.34803241925633	0.302771826932232	0.516027732760503	1.00438488575773	0.727469362833876	1.5249972859905	0.369128556162922
ENSMUSG00000114452	9.31936920010747	13.2155601497157	10.1232400613537	32.6261302936383	25.8637611881987	11.5462797597857	55.2063225952576	40.291408894436	19.9003121750986	31.8813066802461	42.7582419523902	26.0971722847727	17.1157234421333	36.0224607637002	-1.08067081480738	0.00555788145569136	0.200827220932953	A530001N23Rik	13	60631318	60636622	-	3901	lncRNA	RIKEN cDNA A530001N23 gene [Source:MGI Symbol;Acc:MGI:3045361]	-	9	12	11	31	19	10	55	42	23	38	48	30	0.0929988726248167	0.136034060470064	0.103139816704275	0.329038015871039	0.254605208426997	0.116576078967499	0.546386195890094	0.406053679397212	0.201319826714777	0.318748837643073	0.426376127677551
ENSMUSG00000121054	11.3903401334647	8.81037343314377	13.8044182654824	16.839293054781	6.80625294426282	12.7009077357642	18.067523758448	34.535493338088	18.1698502468292	26.0084343970428	16.0343407321463	28.7068895132499	11.7252642611498	23.5870886643007	-0.994224379762455	0.00568184164433184	0.20307961989947	ENSMUSG00000121054	13	63961797	63962962	-	1166	lncRNA	novel transcript	-	11	8	15	16	5	11	18	36	21	31	18	33	0.380281553573805	0.303412732929514	0.470546263406415	0.568174536563016	0.224161532471273	0.429021966086993	0.598255822594895	1.16443180837676	0.614972090547441	0.869969659768314	0.534935658470238
ENSMUSG00000094689	0	1.10129667914297	0	0	0	0	21.0787777181893	0	0	2.51694526422995	4.45398353670732	5.21943445695453	0.183549446523829	5.54485682934685	-4.29516759855589	0.00570002122488706	1	Ighv1-81	12	115883899	115884332	-	351	IG_V_gene	immunoglobulin heavy variable 1-81 [Source:MGI Symbol;Acc:MGI:4439635]	-	0	1	0	0	0	0	21	0	0	3	5	6	0	0.125989760183694	0	0	0	0	2.31859640266834	0	0	0.279675936942337	0.493617424640944
ENSMUSG00000001663	448.365207071837	923.987913800953	924.896023787318	712.512587380423	1012.77043810631	1208.89549084956	1126.20898094326	1122.40353348786	1089.32578384562	1360.82840619366	1162.48970308061	2192.1624719209	871.904610166067	1342.23647991198	-0.622838073689971	0.00571495383390143	0.203172844037918	Gstt1	10	75619647	75634418	-	1528	protein_coding	glutathione S-transferase, theta 1 [Source:MGI Symbol;Acc:MGI:107379]	-	433	839	1005	677	744	1047	1122	1170	1259	1622	1305	2520	11.4228813782268	24.2818052923665	24.0576015640288	18.3453350794006	25.453013882848	31.160808795986	28.4565654603482	28.8783660853648	28.1343598569902	34.7350924458737	29.5947551628152
ENSMUSG00000020032	627.504192807236	472.456275352335	505.241708516655	370.464447205183	554.028989662994	590.014895725048	782.926029532745	755.943576400371	635.079527674887	671.185403794654	709.964975751146	534.122126095014	519.951751544908	681.536939874803	-0.390493239740518	0.00580058448867876	0.203764685948532	Nuak1	10	84206769	84276461	-	5625	protein_coding	NUAK family, SNF1-like kinase, 1 [Source:MGI Symbol;Acc:MGI:1925226]	-	606	429	549	352	407	511	780	788	734	800	797	614	4.34271393339857	3.37269548421342	3.56992784331143	2.59107790434035	3.7823482728047	4.13127178934543	5.37384400527017	5.28340375798043	4.45562051947077	4.65380759072048	4.90979533123663
ENSMUSG00000000263	21.7451948002508	17.6207468662875	20.2464801227075	21.0491163184763	9.52875412196795	28.8656993994642	37.1387988368097	41.2507281538273	44.1267791708709	36.915197208706	23.160714390878	28.7068895132499	19.8426652715257	35.216517879057	-0.817333241750475	0.00596849912243442	0.206169727547908	Glra1	11	55405064	55499024	-	2414	protein_coding	glycine receptor, alpha 1 subunit [Source:MGI Symbol;Acc:MGI:95747]	-	21	16	22	20	7	25	37	43	51	44	26	33	0.35066559165505	0.293106252357758	0.333345836755078	0.343046556354845	0.151582968353813	0.470964461528804	0.593987680622042	0.671802011511485	0.721385772211586	0.59642573462268	0.37321894095056
ENSMUSG00000029633	140.826023468291	181.71395205859	135.283299001727	147.343814229334	110.261297697058	160.493288661021	189.708999463704	155.409720021396	182.563733432427	203.033584647883	199.538462444488	289.678612360976	145.98694585267	203.322185395146	-0.477292083308577	0.00601399412207046	0.206747168526006	Gm5578	6	112582505	112583740	+	1236	processed_pseudogene	predicted pseudogene 5578 [Source:MGI Symbol;Acc:MGI:3645010]	-	136	165	147	140	81	139	189	162	211	242	224	333	4.43538744038833	5.9034765056947	4.3501925911751	4.68996821139496	3.42575406080612	5.11424728828945	5.92592721361594	4.94318260400718	5.82906162540549	6.40675119626644	6.27996381795625
ENSMUSG00000102813	202.955151469007	299.552696726888	242.95776147249	195.75678176183	239.580103638051	278.265342210835	219.821539061117	298.348289670705	440.402560744574	281.058887839011	418.674452450488	438.432494384181	243.17797287985	349.456370691679	-0.524268212431079	0.00602216288202633	0.206747168526006	Gm37795	4	150152996	150155454	+	2459	TEC	predicted gene, 37795 [Source:MGI Symbol;Acc:MGI:5611023]	-	196	272	264	186	176	241	219	311	509	335	470	504	3.21298477309857	4.89162032706696	3.92694680728796	3.13194949145081	3.74148296442657	4.45701307265487	3.45142599346837	4.76992961168081	7.06795727855619	4.45786838082752	6.62318556673579
ENSMUSG00000106073	15.5322820001791	11.0129667914297	27.6088365309647	13.6819256070096	19.0575082439359	27.7110714234856	58.217576554999	36.4541318568707	24.2264669957723	37.7541789634493	27.6146979275854	32.1865124845529	19.1007650995008	36.0755941305382	-0.911222948092131	0.00602902160875409	0.206747168526006	Gm42892	3	116734007	116737979	-	3973	TEC	predicted gene 42892 [Source:MGI Symbol;Acc:MGI:5663029]	-	15	10	30	13	14	24	58	38	28	45	31	37	0.1521891946092	0.111307339100118	0.27619277278222	0.135483098811072	0.184204019937632	0.27471227830992	0.565747193143266	0.360724085952104	0.240643496124949	0.370625171910748	0.270377608734866
ENSMUSG00000033170	1244.65353094769	1634.32427184817	1697.0231521033	1233.47821626271	1233.29303350042	1644.19023779348	1783.66609548678	1857.24208618162	1904.37335206053	1688.03129054355	1599.87088638527	2004.26283147054	1447.82707374263	1806.24109035471	-0.318710593148385	0.00603540620628809	0.206747168526006	Card10	15	78659338	78687242	-	4952	protein_coding	caspase recruitment domain family, member 10 [Source:MGI Symbol;Acc:MGI:2146012]	-	1202	1484	1844	1172	906	1424	1777	1936	2201	2012	1796	2304	9.78441706460938	13.2524334094353	13.6204012269142	9.79957655100544	9.56394774864793	13.077199444474	13.9065618359789	14.7446621896108	15.1765853539683	13.2949988408671	12.5676272222921
ENSMUSG00000034892	1468.31839175027	1342.48065187528	1182.57849807632	1362.93028162134	1419.78436417323	1595.69586280238	1078.02891758739	1745.96105209223	2129.33340273555	2474.99617649279	2020.32693225044	1979.90547067142	1395.29800838314	1904.7586586383	-0.449443456556896	0.00613461075290437	0.207567636136794	Rps29	12	69204496	69205960	-	693	protein_coding	ribosomal protein S29 [Source:MGI Symbol;Acc:MGI:107681]	-	1418	1219	1285	1295	1043	1382	1074	1820	2461	2950	2268	2276	82.4810386068853	77.7880414141949	67.8233931625268	77.3743240416718	78.6757165300285	90.690167180398	60.0598199889711	99.0485822187148	121.258737243196	139.293145217385	113.40635959569
ENSMUSG00000037225	279.581076003224	479.064055427192	643.285891171478	340.995684359316	563.557743784962	665.065714163655	819.061077049641	745.391064547066	668.823535276141	659.439659228248	536.259617819561	1095.21133021763	495.258360818305	754.03104735638	-0.606698572398795	0.00615190440763482	0.207715018288113	Fgf2	3	37402495	37464257	+	6782	protein_coding	fibroblast growth factor 2 [Source:MGI Symbol;Acc:MGI:95516]	-	270	435	699	324	414	576	816	777	773	786	602	1259	1.60478591319409	2.83644154138121	3.76989288557146	1.97809688440838	3.19103956357012	3.86233635526503	4.66278459273607	4.32089132432581	3.89185248562749	3.79232652802878	3.07585812626012
ENSMUSG00000055733	25.8871366669652	31.9376036951462	16.5653019185788	32.6261302936383	27.2250117770513	30.0203273754427	32.1200422372408	61.3964326010453	44.1267791708709	39.4321424729359	40.0858518303659	50.4545330838938	27.3769186211371	44.6026302327254	-0.710379597261944	0.00619281987048003	0.208668901852555	Nap1l3	X	121304262	121307098	-	2837	protein_coding	nucleosome assembly protein 1-like 3 [Source:MGI Symbol;Acc:MGI:1859565]	-	25	29	18	31	20	26	32	64	51	47	45	58	0.355215409577224	0.452044331656618	0.23207202388377	0.452441769444104	0.368519347002473	0.416772836988281	0.437122963471991	0.850806400230168	0.613826314458501	0.54210009772503	0.549643089334065
ENSMUSG00000091549	214.345491602472	219.158039149451	277.928954411712	166.288018915963	216.438843627558	263.255178523113	280.046618255943	322.331271155488	324.461611550521	235.753873082872	371.46222696139	282.71936641837	226.235754371711	302.795827904098	-0.419493074819467	0.00625282769517455	0.209900896702953	Gm6548	17	79158221	79159385	-	1165	processed_pseudogene	predicted gene 6548 [Source:MGI Symbol;Acc:MGI:3644071]	-	207	199	302	158	159	228	279	336	375	281	417	325	7.16235008456346	7.55387017945997	9.48179667100588	5.61553962027528	7.13445547656294	8.90008830591455	9.28092487704509	10.8773589928139	10.991070778331	7.89262298614008	12.403313578098
ENSMUSG00000027004	8.28388373342886	20.9246369037165	1.84058910206432	5.26227907961908	14.9737564773782	6.9277678558714	38.1425501567235	22.0643429660007	32.0135456729848	12.5847263211498	32.0686814642927	13.0485861423863	9.70215219201305	24.9870721205896	-1.38129472764049	0.00625486073199914	0.209900896702953	Frzb	2	80242314	80277969	-	3237	protein_coding	frizzled-related protein [Source:MGI Symbol;Acc:MGI:892032]	-	8	19	2	5	11	6	38	23	37	15	36	15	0.0996227239513706	0.259569264956768	0.022599400396741	0.0639569344331631	0.177639531385638	0.0842934724841914	0.454939741659537	0.267975596720626	0.390295628380154	0.15163153207717	0.385378423093171
ENSMUSG00000002778	1431.04091494984	1645.3372386396	1683.21873383782	1479.75287718888	1553.18692188078	1652.27263362533	1797.71861396557	1875.46915211006	1926.00412616389	1797.93790041493	1640.84753492298	1815.49328527735	1574.13488668704	1808.91176880913	-0.200468255460364	0.00636049026185142	0.211293947670415	Kdelr1	7	45522196	45533156	+	1874	protein_coding	KDEL (Lys-Asp-Glu-Leu) endoplasmic reticulum protein retention receptor 1 [Source:MGI Symbol;Acc:MGI:1915387]	-	1382	1494	1829	1406	1141	1431	1791	1955	2226	2143	1842	2087	29.7268971964428	35.2552157426725	35.6988099960231	31.0653369311387	31.8277318856965	34.7260544012122	37.0372709551718	39.3447948557613	40.5592798843658	37.4191181139216	34.0602344676847
ENSMUSG00000041736	2820.66241123253	4102.33012980757	4199.30403635974	2509.05466516238	4372.33689139444	4902.550386005	4432.56582873923	4658.45432360432	6233.98909659068	5759.60974631287	4422.80565195037	6007.56905995466	3817.70641999361	5252.49895119202	-0.460445545499761	0.00641320613049711	0.211764323471344	Tspo	15	83447793	83458404	+	1051	protein_coding	translocator protein [Source:MGI Symbol;Acc:MGI:88222]	-	2724	3725	4563	2384	3212	4246	4416	4856	7205	6865	4965	6906	104.47575347775	156.734977826999	158.802513892215	93.921251127725	159.757940650647	183.722635973901	162.831839140881	174.25533049167	234.080874534537	213.736547033082	163.698285477287
ENSMUSG00000090272	540.523413606233	623.333920394922	585.307334456452	619.896475579127	588.060254384308	581.932499893198	791.959791411969	737.716510471936	693.915233236048	573.863520244429	679.677887701537	798.573471914043	589.842316385707	712.617735829994	-0.272327278193086	0.0064572180492302	0.212791163594332	Mndal	1	173676692	173708447	-	3591	protein_coding	myeloid nuclear differentiation antigen like [Source:MGI Symbol;Acc:MGI:3780953]	-	522	566	636	589	432	504	789	769	802	684	763	918	5.85957641947808	6.97017034159115	6.47815493979162	6.79141428525356	6.2886579696001	6.38264258318895	8.51480247123853	8.07645996711113	7.62594423860988	6.23277802328636	7.36269358648651
ENSMUSG00000085741	38.3129622671085	57.2674273154345	30.3697201840612	74.7243629305909	38.1150164878718	71.5869345106712	87.3263648324984	70.9896251949587	60.5661674894306	108.228646361888	96.2060443928781	80.0313283399695	51.7294039492897	83.8913627686039	-0.69924581256402	0.00649100458911995	0.213477610009839	5430405H02Rik	2	156685045	156704926	-	6903	lncRNA	RIKEN cDNA 5430405H02 gene [Source:MGI Symbol;Acc:MGI:1921737]	-	37	52	33	71	28	62	87	74	70	129	108	92	0.216060300321087	0.333125467604344	0.174858072561225	0.425873688830091	0.21203609190561	0.408450291340536	0.48842103397614	0.40430020021078	0.34625402365074	0.611494845179007	0.542142527402258
ENSMUSG00000024927	1510.77329588409	1647.53983199788	1766.96553798174	1417.65798404938	1485.12439243815	1602.62363065825	1895.08249199721	1827.50318914049	1704.5049993454	1870.9293130776	1696.07693077815	1986.86471661402	1571.78077883492	1830.16027349215	-0.219072126228445	0.00654354209109935	0.213924490148897	Rela	19	5687511	5698158	+	3072	protein_coding	v-rel reticuloendotheliosis viral oncogene homolog A (avian) [Source:MGI Symbol;Acc:MGI:103290]	RHD	1459	1496	1920	1347	1091	1388	1888	1905	1970	2230	1904	2284	19.1445518835948	21.5353903363988	22.8607059638283	18.1554374893177	18.5649238558529	20.5472473393383	23.8173675113387	23.387504211161	21.8967508592089	23.7533361678467	21.4769856352371
ENSMUSG00000023341	37.2774768004299	46.2544605240048	42.3335493474792	38.9408651891812	42.1987682544295	33.4842113033784	80.300105593102	47.9659629695667	55.3747817046223	39.4321424729359	89.0796707341463	68.7225536832347	40.0815552364838	63.4792028596013	-0.661667499796324	0.00658136492945004	0.214533362692922	Mx2	16	97336508	97362100	+	3612	protein_coding	MX dynamin-like GTPase 2 [Source:MGI Symbol;Acc:MGI:97244]	-	36	42	46	37	31	29	80	50	64	47	100	79	0.401759249290598	0.514214021214845	0.465821694058075	0.424144965676939	0.448645778112216	0.365120023186992	0.858331843417802	0.522074369604138	0.605016048159736	0.425785707986132	0.959356124302167
ENSMUSG00000034522	977.498280544605	988.964417870388	945.142503910026	1097.71141600854	1135.28299110304	1006.83559505331	1411.27435579877	1325.77921647882	930.988517408962	1134.30333241297	1446.65385272254	1510.15636954551	1025.23920074832	1293.19260739459	-0.335217621403922	0.00658820668341435	0.214533362692922	Zfp395	14	65595838	65636379	+	4733	protein_coding	zinc finger protein 395 [Source:MGI Symbol;Acc:MGI:2682318]	-	944	898	1027	1043	834	872	1406	1382	1076	1352	1624	1736	8.03982534899836	8.39039096352843	7.93676569612566	9.12448030512721	9.21126293186116	8.37848264723282	11.5122919752422	11.0123916543419	7.76265757502308	9.34719171968869	11.8898702245311
ENSMUSG00000040033	946.433716544247	881.037343314377	895.446598154289	864.066224873452	876.645379221052	934.094032566661	1046.91262667007	1033.18684236447	1061.63839299331	1083.96442712837	903.267861244244	1067.3743464472	899.620549112346	1032.72408280794	-0.198972210840742	0.00662814806568106	0.214617686665864	Stat2	10	128106428	128128718	+	5926	protein_coding	signal transducer and activator of transcription 2 [Source:MGI Symbol;Acc:MGI:103039]	STAT	914	800	973	821	644	809	1043	1077	1227	1292	1014	1227	6.21721195350059	5.96995016192733	6.00566099299493	5.73643192507871	5.68085694832294	6.20829390479649	6.8208051109884	6.85431668910539	7.06997011112124	7.13414332297526	5.92930651615447
ENSMUSG00000030805	825.28191694285	1013.19294481153	897.287187256354	890.377620271548	1019.57669105057	981.433779581782	939.511235439294	1096.50191348429	1124.80025337514	1187.15918296179	1112.60508746949	1272.67210175408	937.85835665244	1122.20829574735	-0.26014015859684	0.00671241066840056	0.216863510947522	Stx4a	7	127423466	127448191	+	2364	protein_coding	syntaxin 4A (placental) [Source:MGI Symbol;Acc:MGI:893577]	-	797	920	975	846	749	850	936	1143	1300	1415	1249	1463	13.5900787686219	17.2100733327067	15.0857450522725	14.8177828137975	16.5624270557755	16.3514717193054	15.3440977307841	18.2351301869763	18.7771874718357	19.5861885535061	18.3080698261561
ENSMUSG00000052676	138.755052534933	131.054304818014	109.515051572827	170.497842179658	185.130080083949	144.328496997321	204.76526926241	220.643429660007	211.116355248872	153.533661118027	176.37774805361	212.257001249484	146.546804697784	196.448910765402	-0.426791873106487	0.00677825966476225	0.218135516594312	Zmat1	X	133872121	133909958	-	5391	protein_coding	zinc finger, matrin type 1 [Source:MGI Symbol;Acc:MGI:2442284]	zf-C2H2	134	119	119	162	136	125	204	230	244	183	198	244	1.0019512496684	0.976157724561812	0.807397220462422	1.2442453227655	1.31874009175161	1.05445020416484	1.46647213448043	1.60904657129413	1.54545070398733	1.11076636725512	1.27269240503418
ENSMUSG00000102323	0	1.10129667914297	0	0	1.36125058885256	0	6.02250791948265	0.959319259391334	3.46092385653889	5.87287228320322	6.23557695139024	0.869905742825755	0.410424544665923	3.90351766880535	-3.31294752947577	0.00680512275893292	1	Gm37790	2	156688290	156691635	-	3346	TEC	predicted gene, 37790 [Source:MGI Symbol;Acc:MGI:5611018]	-	0	1	0	0	1	0	6	1	4	7	7	1	0	0.0132164990509494	0	0	0.0156229735123433	0	0.0694925571972153	0.0112715637956375	0.0408195973915303	0.0684562439796096	0.0724936050414107
ENSMUSG00000001657	926.759492677354	1236.75617067756	1321.54297528218	776.712392151776	902.50914040925	1182.33904740205	1766.60232304824	1829.42182765927	1560.87665929904	995.871342880318	1199.90316478895	1436.21438140532	1057.76986976669	1464.81494984686	-0.469189887554615	0.00682642946543318	0.218857898126262	Hoxc8	15	102899039	102902543	+	2832	protein_coding	homeobox C8 [Source:MGI Symbol;Acc:MGI:96198]	Homeobox	895	1123	1436	738	663	1024	1760	1907	1804	1187	1347	1651	12.7391634843033	17.5359328181099	18.5468778328008	10.7900497463976	12.2379848848289	16.443418180419	24.0842096064097	25.3961307350307	21.7509357928316	13.7150827848216	16.481697564828
ENSMUSG00000068245	326.177922003761	246.690456128026	288.052194473065	245.222205110249	302.197630725269	277.110714234856	312.166660493184	360.704041531141	378.105931326874	307.067322236054	360.772666473293	358.401166044211	280.908520445871	346.202964684126	-0.302133782593409	0.00684651171512145	0.218857898126262	Phf11d	14	59584856	59602919	-	4498	protein_coding	PHD finger protein 11D [Source:MGI Symbol;Acc:MGI:1277133]	-	315	224	313	233	222	240	311	376	437	366	405	412	2.82294376919283	2.20227187743059	2.54527379872949	2.1448494017392	2.58002049814379	2.42648261833106	2.67950096245611	3.15266992553052	3.31739089290186	2.66257958464756	3.12006158291834
ENSMUSG00000028631	290.971416136689	498.887395651766	472.111104679497	374.674270468878	661.567786182346	518.427961214377	770.881013693779	662.889608239411	546.825969333145	549.533049356873	611.977337943585	820.321115484687	469.439989055592	660.404682341913	-0.493725517316786	0.00696970425402324	0.221698488404519	Kcnq4	4	120553335	120605809	-	4024	protein_coding	potassium voltage-gated channel, subfamily Q, member 4 [Source:MGI Symbol;Acc:MGI:1926803]	-	281	453	513	356	486	449	768	691	632	655	687	943	2.81487732473891	4.97831755429621	4.66303863198566	3.66313024088534	6.31346722538226	5.07427223010545	7.39632910956286	6.47634812375751	5.36282676783935	5.32628365496421	5.91597539391866
ENSMUSG00000120111	0	2.20259335828594	0.920294551032158	0	2.72250117770513	1.15462797597857	7.02625923939643	7.67455407513067	1.73046192826945	6.71185403794654	7.12637365873171	4.34952871412878	1.1666695105003	5.76983860893393	-2.36874285254992	0.00702853443092227	1	ENSMUSG00000120111	9	42175720	42177713	+	1994	lncRNA	novel transcript	-	0	2	1	0	2	1	7	8	2	8	8	5	0	0.0443554722412003	0.0183435955577359	0	0.0524317646662997	0.0228065839544741	0.136046027639015	0.151312547483261	0.0342483382327132	0.131282185044146	0.139024847381321
ENSMUSG00000041429	107.690488534575	85.9011409731517	83.7468041439263	83.1440094579814	80.3137847423013	124.699821405685	97.3638780316362	144.857208168091	127.188951727804	152.694679363284	115.80357195439	145.274259051901	94.2493415429369	130.530424716185	-0.471113523957909	0.0070400363222787	0.222485546916136	Nthl1	17	24851654	24857811	+	2718	protein_coding	nth (endonuclease III)-like 1 (E.coli) [Source:MGI Symbol;Acc:MGI:1313275]	-	104	78	91	79	59	108	97	151	147	182	130	167	1.54239287954291	1.26907566383708	1.2246205990925	1.20347749404354	1.13472909969306	1.80700642669753	1.38304165741002	2.09525847001127	1.84672634402068	2.19110353246877	1.6573777105494
ENSMUSG00000084960	71.4484972008239	85.9011409731517	81.906215041862	94.7210234331434	132.041307118699	61.1952827268641	87.3263648324984	179.392701506179	148.819725831172	119.974390928294	171.032967809561	102.648877653439	87.868911082424	134.865838093524	-0.622822695365272	0.0070484587904487	0.222485546916136	B430010I23Rik	8	41470505	41477253	+	3270	lncRNA	RIKEN cDNA B430010I23 gene [Source:MGI Symbol;Acc:MGI:1926099]	-	69	78	89	90	97	53	87	187	172	143	192	118	0.850574704232052	1.05484637746458	0.995524320871301	1.13960695464302	1.55064939728232	0.737078105650375	1.03106128365055	2.15677064527766	1.79603731911272	1.43096578011689	2.0346095095659
ENSMUSG00000107835	1.03548546667861	0	0.920294551032158	0	0	3.4638839279357	8.0300105593102	4.79659629695667	0	5.0338905284599	9.7987637807561	13.0485861423863	0.903277324274411	6.7846412179782	-2.90286194154423	0.00717000354871673	1	Gm43999	6	88719709	88722597	+	2889	TEC	predicted gene, 43999 [Source:MGI Symbol;Acc:MGI:5690391]	-	1	0	1	0	0	3	8	5	0	6	11	15	0.0139528711245494	0	0.012660827117385	0	0	0.0472236016668964	0.107313763185362	0.0652728495330615	0	0.0679586388831846	0.131938863034869
ENSMUSG00000085211	131.506654268183	101.319294481153	100.312106062505	167.340474731887	54.4500235541026	101.607261886114	189.708999463704	259.975519295051	177.372347647618	139.270971287391	185.285715127024	106.998406367568	109.422635830657	176.435326531393	-0.6847903084762	0.00718734340450755	0.225144215353747	B430219N15Rik	10	7655949	7657121	+	1173	lncRNA	RIKEN cDNA B430219N15 gene [Source:MGI Symbol;Acc:MGI:3697426]	-	127	92	109	159	40	88	189	271	205	166	208	123	4.36432248440798	3.46842398623347	3.39889780058965	5.61253996331862	1.78259060093097	3.41169386160228	6.24419951920656	8.71327435355072	5.96747366555251	4.63074684338795	6.14459010028748
ENSMUSG00000026688	1819.34796495431	2914.0310130123	2608.11475762513	2202.79002272855	2493.8110787779	2338.1216513566	3136.72287473055	2735.97852778408	3033.49976025634	2829.88545874921	2736.52748495298	3276.06502748179	2396.03608140913	2958.11318899249	-0.304093317446457	0.00727295602117179	0.226469449677496	Mgst3	1	167199535	167221410	-	1097	protein_coding	microsomal glutathione S-transferase 3 [Source:MGI Symbol;Acc:MGI:1913697]	-	1757	2646	2834	2093	1832	2025	3125	2852	3506	3373	3072	3766	64.5618934372768	106.665894085292	94.4936965564113	78.9992439414752	87.2988403737968	83.9467320151076	110.396771679335	98.0512204343653	109.128942408715	100.612207320748	97.0380761535899
ENSMUSG00000024845	1145.24692614654	1471.33236333501	1452.22480152874	1099.81632764039	1726.06574666505	1683.44758897675	1738.49728609066	1897.53349507606	1965.80475051409	1806.32771796236	1528.60714979795	1937.28008927296	1429.68895904875	1812.34174811901	-0.342773885930258	0.00768301764033409	0.237065695992106	Tmem134	19	4175934	4182306	+	1848	protein_coding	transmembrane protein 134 [Source:MGI Symbol;Acc:MGI:1914240]	-	1106	1336	1578	1045	1268	1458	1732	1978	2272	2153	1716	2227	24.1248312850534	31.9703107042754	31.2330684077239	23.4139484431121	35.8679800671415	35.8790513067168	36.3210922559001	40.3677394839185	41.9798635234471	38.122645125385	32.1768044090947
ENSMUSG00000097092	6.21291280007164	2.20259335828594	3.68117820412863	3.15736744777145	1.36125058885256	5.77313987989284	1.00375131991378	18.2270659284353	11.2480025337514	15.940653340123	15.1435440248049	10.4388689139091	3.73140704650051	12.0003143434896	-1.67414560103392	0.00768603814715951	1	Gm26725	5	66308555	66332288	+	1113	lncRNA	predicted gene, 26725 [Source:MGI Symbol;Acc:MGI:5477219]	-	6	2	4	3	1	5	1	19	13	19	17	12	0.217303744899317	0.0794652395767775	0.131454194221475	0.111605712539164	0.0469671782320762	0.20429617432714	0.0348191219499674	0.643826052779744	0.398825437407184	0.558598030388872	0.529274963671611
ENSMUSG00000031517	54.8807297339662	55.0648339571486	67.1815022253475	47.3605117165717	36.7537658990192	68.1230505827355	74.2775976736194	82.5014563076547	77.0055558079904	64.6015951152355	105.114011466293	77.4216111114922	54.8940656857981	80.1536379137141	-0.538726347426158	0.00778433421247382	0.239742943586787	Gpm6a	8	55407878	55513906	+	3215	protein_coding	glycoprotein m6a [Source:MGI Symbol;Acc:MGI:107671]	-	53	50	73	45	27	59	74	86	89	77	118	89	0.664516879619794	0.687751256990306	0.830522692558367	0.579551281754694	0.439007985397239	0.834557815212459	0.891997674041436	1.0088522897597	0.945243482551584	0.783701560159723	1.27182870878872
ENSMUSG00000076749	2.07097093335722	6.60778007485783	5.52176730619295	10.5245581592382	0	4.61851190391427	11.0412645190515	20.145704447218	7.78707867721251	11.7457445664064	19.5975275615122	12.1786803995606	4.89059806292673	13.7493333618269	-1.46359442592244	0.00789497801229008	1	Trgc1	13	19398273	19401194	+	924	TR_C_gene	T cell receptor gamma, constant 1 [Source:MGI Symbol;Acc:MGI:98625]	-	2	6	6	10	0	4	11	21	9	14	22	14	0.0872507460580592	0.287158479379719	0.237513828195619	0.448113845801188	0	0.196867222533425	0.461353365837068	0.857151192277339	0.332586946928718	0.495789160943233	0.825046266899864
ENSMUSG00000049401	972.320853211212	963.6345942501	854.953637908874	861.961313241605	959.681665141058	1009.14485100527	1024.83009763196	1045.65799273655	1157.67903001226	1113.32878854438	1043.12294429685	1069.11415793285	936.94948579302	1075.62216852581	-0.20028505974666	0.00790519384491444	0.242558433859693	Ogfr	2	180231038	180237629	+	2580	protein_coding	opioid growth factor receptor [Source:MGI Symbol;Acc:MGI:1919325]	-	939	875	929	819	705	874	1021	1090	1338	1327	1171	1229	14.670908586595	14.9979089520997	13.1706020715637	13.1439085850048	14.2843026773148	15.4055469093657	15.3362442122676	15.9337097603183	17.7080634595753	16.8303125169497	15.7276843018097
ENSMUSG00000041375	833.565800676279	699.323391255787	723.351517111276	750.40099675368	687.431547370545	923.702380782854	826.087336289037	884.49235715881	805.530027609427	1066.34581027876	1063.61126856571	1128.267748445	769.62927232507	962.389091391124	-0.32262689364847	0.00795658784494516	0.243681594648999	Ccdc9	7	16007967	16020720	-	5507	protein_coding	coiled-coil domain containing 9 [Source:MGI Symbol;Acc:MGI:1921443]	-	805	635	786	713	505	800	823	922	931	1271	1194	1297	5.89239603531011	5.09918788787774	5.22055998186136	5.36086397276144	4.79364572961901	6.6063306199704	5.79158904794774	6.3143107986757	5.77257078009298	7.55216443705902	7.51305977710085
ENSMUSG00000067212	1702.33810721963	1852.38101431848	2187.54014780344	2072.28550155399	1530.04566187028	1894.74450858083	1988.43136474919	2576.73153072512	1980.51367690438	2832.40240401344	2306.27267530705	2352.22512860084	1873.22249022444	2339.42946338334	-0.320254085658311	0.00797404392628053	0.243753912919093	H2-T23	17	36340665	36343747	-	2889	protein_coding	histocompatibility 2, T region locus 23 [Source:MGI Symbol;Acc:MGI:95957]	-	1644	1682	2377	1969	1124	1641	1981	2686	2289	3376	2589	2704	22.9385201287593	25.7466551044548	30.0947860580242	28.2200974053813	20.3380074677972	25.8313101117923	26.5735706087752	35.0645747691606	27.0540889152082	38.2380608116052	31.0536105815706
ENSMUSG00000097194	21.7451948002508	74.888174181722	36.8117820412863	62.0948931395051	32.6700141324616	56.5767708229498	94.3526240718949	105.525118533047	78.7360177362598	72.1524309079253	62.3557695139024	66.1128364547574	47.4644715196959	79.8724662029644	-0.749247504767907	0.00804959893626006	0.244710777994016	9330175E14Rik	8	95149524	95161731	-	6000	lncRNA	RIKEN cDNA 9330175E14 gene [Source:MGI Symbol;Acc:MGI:2443913]	-	21	68	40	59	24	49	94	110	91	86	70	76	0.141084456375882	0.501187266010736	0.243847530280836	0.40715624029496	0.209097877489203	0.371390015309307	0.607141029441582	0.69143529510372	0.517874830473229	0.469016546252298	0.404272670780933
ENSMUSG00000057596	187.422869468828	203.73988564145	239.276583268361	196.809237577753	206.91008950559	215.915431507992	243.911570739047	259.975519295051	353.014233366967	221.491183252236	251.204671470293	273.150403247287	208.345682828329	267.124596895147	-0.358169158360281	0.00811414981509986	0.246218870172008	Trim30d	7	104119221	104157056	-	3758	protein_coding	tripartite motif-containing 30D [Source:MGI Symbol;Acc:MGI:3035181]	-	181	185	260	187	152	187	243	271	408	264	282	314	1.94148001247127	2.17699443255141	2.53061566816194	2.0603697495555	2.11434788307337	2.26292533575742	2.50589273641997	2.71971016942922	3.70713199386646	2.29873079837011	2.60027886779191
ENSMUSG00000121135	141.861508934969	189.423028812591	230.073637758039	129.452065358629	155.182567129192	115.462797597857	180.67523758448	313.697397820966	178.237578611753	208.906456931086	215.572803176634	338.393333959219	160.24260093188	239.24713468069	-0.57642819257781	0.00813287962081589	0.246333561603278	Hmga2-ps1	1	176662183	176663734	-	1552	lncRNA	high mobility group AT-hook 2, pseudogene 1 [Source:NCBI gene (formerly Entrezgene);Acc:15365]	-	137	172	250	123	114	100	180	327	206	249	242	389	3.55827881507654	4.90093672797036	5.89193452675988	3.28150997441989	3.83974839461488	2.93017579930549	4.49462815171165	7.94632174902471	4.53221147094788	5.24987053540019	5.40320248503236
ENSMUSG00000028936	2513.12322762898	2091.3623936925	2051.33655425068	2316.45525084832	1986.06460913589	2035.60912165021	2265.46672904539	2692.80916111147	2344.7759128051	2646.14845446042	2817.58998532105	2568.83165856445	2165.6585262011	2555.93698355132	-0.238847714107996	0.00821055909829488	0.24716778111407	Rpl22	4	152410199	152418528	+	2911	protein_coding	ribosomal protein L22 [Source:MGI Symbol;Acc:MGI:99262]	-	2427	1899	2229	2201	1459	1763	2257	2807	2710	3154	3163	2953	33.6076925577136	28.8486254416631	28.0077024216411	31.3067634125103	26.2000861608337	27.5420017102044	30.0470841368321	36.3672378755718	31.7878933771284	35.4536086906861	37.6516992004738
ENSMUSG00000039236	130.471168801505	140.9659749303	159.210957328563	131.556976990477	152.460065951487	167.421056516892	171.641475705256	234.073899291485	243.129900921857	177.02515025084	155.889423784756	181.810300250583	147.014366753204	193.928358367463	-0.400187447569041	0.00822484827181406	0.24716778111407	Isg20	7	78563172	78570144	+	1860	protein_coding	interferon-stimulated protein [Source:MGI Symbol;Acc:MGI:1928895]	-	126	128	173	125	112	145	171	244	281	211	175	209	2.73066689759771	3.04326233630807	3.40206634988585	2.78264242957189	3.14770998370844	3.54519764449306	3.56283857359336	4.94751354854275	5.15855467433454	3.71202142757821	3.26026347403979
ENSMUSG00000103183	99.4066048011463	102.420591160296	115.03681887902	131.556976990477	95.2875412196795	108.535029741985	133.498925548532	139.101292611743	117.671411122322	177.02515025084	126.493132442488	227.915304620348	108.707260465434	153.617536099379	-0.498033692977522	0.00823309278367915	0.24716778111407	Gm37090	4	156103013	156107117	-	4105	TEC	predicted gene, 37090 [Source:MGI Symbol;Acc:MGI:5610318]	-	96	93	125	125	70	94	133	145	136	211	142	262	0.942690642915235	1.00187180065197	1.11379809811588	1.26083189257094	0.891403862621451	1.04135806823162	1.25560043925255	1.33218626229706	1.13125473267967	1.68193906340937	1.19867866888935
ENSMUSG00000049517	3701.86054337602	3139.79683223661	3149.24795363204	3194.20340132878	2955.27502839892	3417.69880889656	2987.16392806339	4246.90636132543	4013.80644262098	4496.94220542418	4210.7960356031	3818.88621100506	3259.68042797816	3962.41686400703	-0.281654614433029	0.00823542585614033	0.24716778111407	Rps23	13	91071077	91073069	+	1268	protein_coding	ribosomal protein S23 [Source:MGI Symbol;Acc:MGI:1913725]	-	3575	2851	3422	3035	2171	2960	2976	4427	4639	5360	4727	4390	113.649601519553	99.4306616763273	98.7120956570607	99.105960751901	89.5014771350671	106.159252428592	90.9550156194114	131.674106026276	124.922245219536	138.320483892175	129.179602170897
ENSMUSG00000000142	237.126171869401	187.220435454305	303.697201840612	209.438707368839	236.857602460346	233.234851147671	287.07287749534	315.616036339749	326.192073478791	229.881000799669	399.967721596317	314.905878902923	234.595828356862	312.272598102131	-0.411169844977035	0.00827925133646256	0.247581169275669	Axin2	11	108811175	108841609	+	5506	protein_coding	axin 2 [Source:MGI Symbol;Acc:MGI:1270862]	-	229	170	330	199	174	202	286	329	377	274	449	362	1.67652641326744	1.36538485110081	2.19223624208161	1.49650166201488	1.65197197071928	1.66840144167357	2.0129955068779	2.25356350515924	2.33797469000939	1.6283783484376	2.82577597188479
ENSMUSG00000074358	230.913259069329	297.350103368602	261.363652493133	227.330456239544	239.580103638051	270.182946378985	303.13289861396	259.975519295051	355.609926259371	330.558811368867	305.543270618122	334.913710987916	254.453420197941	314.955689523881	-0.308456580053671	0.00844558155079565	0.250086136326852	Ccdc61	7	18624808	18644340	-	2737	protein_coding	coiled-coil domain containing 61 [Source:MGI Symbol;Acc:MGI:2685005]	-	223	270	284	216	176	234	302	271	411	394	343	385	3.28428767386832	4.36245874044892	3.79536163316171	3.26767825357634	3.36145656175555	3.88800177085195	4.27607314013692	3.73426043723602	5.12745298231794	4.71044988716399	4.34257088818394
ENSMUSG00000120690	2.07097093335722	7.7090767540008	2.76088365309647	4.20982326369526	4.08375176655769	2.30925595195713	15.0562697987066	11.511831112696	2.59569289240417	5.87287228320322	21.3791209761951	14.7883976280378	3.8572937204441	11.8673641152072	-1.62534468006757	0.00853751121334762	1	ENSMUSG00000120690	19	5073126	5074010	-	885	lncRNA	novel transcript, antisense to Slc29a2	-	2	7	3	4	3	2	15	12	3	7	24	17	0.0910956941894313	0.349781740984561	0.123990269634323	0.187144494246462	0.177201591092545	0.102771363627619	0.656842080174809	0.511385118104446	0.11574777362039	0.258818748424603	0.939713714163913
ENSMUSG00000022037	2715.04289363131	1742.25134640418	1443.94215056946	2022.82007820557	1520.51690774831	2257.2976930381	2150.03532725531	2755.16491297191	2250.46573771442	3518.68947939347	3295.05702045607	2226.95870163393	1950.31184493282	2699.39519657085	-0.468910245845071	0.00859427558775263	0.252420461424956	Clu	14	66205932	66218996	+	3437	protein_coding	clusterin [Source:MGI Symbol;Acc:MGI:88423]	-	2622	1582	1569	1922	1117	1955	2142	2872	2601	4194	3699	2560	30.7513566330738	20.3549159192092	16.697560736571	23.1544348544083	16.988822312732	25.867390757116	24.151989644554	31.5148332457675	25.8401768868365	39.9291309007072	37.2934355347772
ENSMUSG00000016458	0	2.20259335828594	0	0	0	0	0	2.877957778174	4.32615482067362	0	23.160714390878	8.69905742825755	0.367098893047657	6.5106474029972	-4.05248419205854	0.00860552166705449	1	Wt1	2	104956874	105003961	+	6195	protein_coding	WT1 transcription factor [Source:MGI Symbol;Acc:MGI:98968]	zf-C2H2	0	2	0	0	0	0	0	3	5	0	26	10	0	0.0142768057544719	0	0	0	0	0	0.0182637542180159	0.0275589937191405	0	0.145431884334891
ENSMUSG00000075590	1862.83835455481	1606.79185486959	1710.82757036878	2168.05898080306	1430.67436888405	2472.05849657011	1956.31132251195	2924.96442188418	1649.13021764078	2953.21577669648	3371.66553728744	2852.42093072565	1875.2082710084	2617.95136779108	-0.481330344676373	0.00868246695271991	0.252692155476406	Nrbp2	15	75957367	75963476	-	3894	protein_coding	nuclear receptor binding protein 2 [Source:MGI Symbol;Acc:MGI:2385017]	-	1799	1459	1859	2060	1051	2141	1949	3049	1906	3520	3785	3279	18.6228583916803	16.5692064966388	17.4619629735005	21.9044123947564	14.1090054725958	25.0038056280377	19.3967456706167	29.5305535056905	16.713277009126	29.5792855342403	33.6819735616516
ENSMUSG00000061887	806.643178542635	928.393100517525	912.011900072868	881.957973744157	917.482896886629	968.732871846018	1073.01016098783	1101.29850978125	1044.33377371061	882.60880598997	1084.9903895419	1225.69719164149	902.536986934972	1068.65647194217	-0.243874956920743	0.008683450899993	0.252692155476406	Ssbp3	4	106767898	106906891	+	6582	protein_coding	single-stranded DNA binding protein 3 [Source:MGI Symbol;Acc:MGI:1919725]	-	779	843	991	838	674	839	1069	1148	1207	1052	1218	1409	4.7707944401099	5.66385416439287	5.50713086846646	5.27164886311166	5.35293107823317	5.79681548647533	6.29408794267782	6.57800380193147	6.26158174022245	5.22996551543764	6.41234682915975
ENSMUSG00000049414	24.8516512002866	72.6855808234361	23.9276583268361	33.6785861095621	28.5862623659039	35.7934672553356	38.1425501567235	76.7455407513067	81.331710628664	57.0507593225456	53.4478024404878	77.4216111114922	36.58720101356	64.0233290685366	-0.809914856592782	0.00871080853317107	0.252692155476406	Gm5417	15	83289827	83290264	-	438	processed_pseudogene	predicted gene 5417 [Source:MGI Symbol;Acc:MGI:3648626]	-	24	66	26	32	21	31	38	80	94	68	60	89	2.20875861253827	6.66365019272936	2.17124513263758	3.02507538644966	2.50631017538429	3.21864424785813	3.36219165240165	6.88852099729734	7.32804968605803	5.08014099158272	4.74684153558826
ENSMUSG00000116498	22.7806802669294	12.1142634705727	17.485596469611	38.9408651891812	19.0575082439359	18.4740476156571	21.0787777181893	51.803240007132	31.14831470885	98.9998470597115	48.9938189037805	22.6175493134696	21.4754935426479	45.7735912851888	-1.09203104509708	0.00871087845545906	0.252692155476406	Gm38563	15	61029689	61037584	+	1780	lncRNA	predicted gene, 38563 [Source:MGI Symbol;Acc:MGI:5621448]	-	22	11	19	37	14	16	21	54	36	118	55	26	0.498211563446131	0.27328453037598	0.390430034438417	0.86068068316017	0.411147511916973	0.40877598566491	0.457206369290218	1.14415237800616	0.690585031375586	2.16921684574489	1.07070611041499
ENSMUSG00000039069	278.545590536545	270.918983069171	270.566598003454	295.740084274592	280.417621303628	237.853363051585	333.245438211373	306.022843745835	304.561299375423	345.660482954247	340.284342204439	314.035973160098	272.340373373163	323.968396608569	-0.250301326172682	0.00882542869614803	0.254238408507867	Mtg2	2	179712381	179727695	+	5949	protein_coding	mitochondrial ribosome associated GTPase 2 [Source:MGI Symbol;Acc:MGI:106565]	-	269	246	294	281	206	206	332	319	352	412	382	361	1.82271780443831	1.82866226808224	1.80764432432087	1.95579208907722	1.81014299725903	1.57473922532788	2.162753852154	2.02235235078244	2.02038137716277	2.26617899888526	2.22508695682323
ENSMUSG00000034450	7.24839826675025	2.20259335828594	6.4420618572251	18.9442046866287	38.1150164878718	6.9277678558714	6.02250791948265	34.535493338088	11.2480025337514	299.516486443364	23.160714390878	56.5438732836741	13.3133404187722	71.8378463182064	-2.44048513292072	0.00884751975272084	0.254238408507867	Gulo	14	66224235	66246656	-	2263	protein_coding	gulonolactone (L-) oxidase [Source:MGI Symbol;Acc:MGI:1353434]	-	7	2	7	18	28	6	6	36	13	357	26	65	0.124687986191676	0.0390829923327236	0.11314180591908	0.329342884815084	0.646789722679816	0.120573561834436	0.102749490226196	0.599967957829123	0.196152325158726	5.16207874951147	0.398122193307402
ENSMUSG00000039741	1113.1468766795	1381.02603564529	1233.19469838309	917.741471485567	951.514161607943	1180.0297914501	1609.01336582178	1323.86057796004	1111.82178891312	1403.61647568557	1688.95055711941	1477.09995131813	1129.44217254191	1435.72711946968	-0.345696413770691	0.00884758213467906	0.254238408507867	Bahcc1	11	120123773	120183108	+	11100	protein_coding	BAH domain and coiled-coil containing 1 [Source:MGI Symbol;Acc:MGI:2679272]	-	1075	1254	1340	872	699	1022	1603	1380	1285	1673	1896	1698	3.90388135403019	4.99593665800845	4.41561744022054	3.25277362837567	3.2918787469584	4.18709978649875	5.59659039790026	4.68884868424144	3.95289074640985	4.93189617775044	5.91892651583513
ENSMUSG00000114024	0	0	0	2.10491163184763	1.36125058885256	3.4638839279357	2.00750263982755	2.877957778174	12.9784644620208	0.838981754743317	12.4711539027805	13.0485861423863	1.15500769143932	7.37044111332209	-2.7173115295755	0.00894287470938799	1	Gm46336	12	17394402	17398386	-	1972	lncRNA	predicted gene, 46336 [Source:MGI Symbol;Acc:MGI:5825973]	-	0	0	0	2	1	3	2	3	15	1	14	15	0	0	0	0.0419936301744724	0.0265083516086718	0.0691830553831966	0.0393039378603588	0.0573752319374284	0.25972814313906	0.0165933491999256	0.246007710414361
ENSMUSG00000024431	2208.69050042547	2300.60876272967	2414.85290190838	2129.11811561388	2971.61003546515	2188.02001447938	3704.84612180174	3065.02503375531	2442.54701175232	2482.54701228548	3144.51237691537	2965.508677293	2368.81672177032	2967.49770563387	-0.325229286932077	0.00894936272566199	0.255840926386304	Nr3c1	18	39543598	39652474	-	7684	protein_coding	nuclear receptor subfamily 3, group C, member 1 [Source:MGI Symbol;Acc:MGI:95824]	ESR-like	2133	2089	2624	2023	2183	1895	3691	3195	2823	2959	3530	3409	11.1896016007197	12.0224630098037	12.4906803642031	10.9010632807335	14.8510107547804	11.2152059250253	18.6152840913051	15.6817171538715	12.5446394657023	12.6008131698657	15.9189692257384
ENSMUSG00000105867	18.6387384002149	42.9505704865759	20.2464801227075	35.7834977414097	47.6437706098398	56.5767708229498	70.2625923939643	72.9082637137413	33.7440076012542	57.0507593225456	73.045330002	78.2915168543179	36.9733046972829	64.2170783146372	-0.805434019736554	0.00897948267111132	0.255840926386304	Gm42517	5	108513939	108515788	-	1850	protein_coding	predicted gene 42517 [Source:MGI Symbol;Acc:MGI:5662654]	-	18	39	22	34	35	49	70	76	39	68	82	90	0.392203894172335	0.932256122786266	0.43497127023068	0.760969977280547	0.98897644758407	1.20450815775991	1.46635556276863	1.54935869566239	0.719826019190588	1.20275770503418	1.53592396929899
ENSMUSG00000030337	385.200593604442	328.186410384605	304.617496391644	430.45442871284	451.935195499052	496.490029670784	587.194522149558	506.520568958624	354.744695295237	544.499158828413	568.328299283854	675.916762175612	399.480692377228	539.534001115216	-0.434807318729989	0.0090062949487454	0.255840926386304	Vamp1	6	125192514	125222927	+	10167	protein_coding	vesicle-associated membrane protein 1 [Source:MGI Symbol;Acc:MGI:1313276]	-	372	298	331	409	332	430	585	528	410	649	638	777	1.47489546774095	1.29618146313505	1.19081635472052	1.66567711369924	1.70700539309569	1.92336197641833	2.22985191277993	1.95862461876533	1.37697385850164	2.08878065504499	2.17448015814387
ENSMUSG00000033883	265.084279469724	198.233402245735	180.377732002303	201.019060841449	245.025105993462	264.409806499092	305.140401253788	338.639698565141	269.086829845899	270.152125027348	274.365385861171	267.061063047507	225.691564508627	287.407583933476	-0.350355328829003	0.00903985783149179	0.255840926386304	Zfp267	3	36205166	36224491	+	6800	protein_coding	zinc finger protein 267 [Source:MGI Symbol;Acc:MGI:1098769]	zf-C2H2	256	180	196	191	180	229	304	353	311	322	308	307	1.517547093791	1.17059309535379	1.05428196915538	1.16301358768201	1.38373595397267	1.53148223599936	1.73251758088461	1.95783416447818	1.56165874864745	1.54948694828906	1.56952919244362
ENSMUSG00000044122	247.481026536187	382.149947662611	322.103092861255	312.579377329373	390.678919000686	315.213437442149	382.429252887148	473.903714139319	467.224720632751	343.98251944476	456.978710866171	393.197395757241	328.367633472044	419.619385621232	-0.355445882096044	0.00911016360131784	0.257026733526337	Proca1	11	78084218	78096589	+	2494	protein_coding	protein interacting with cyclin A1 [Source:MGI Symbol;Acc:MGI:1918274]	-	239	347	350	297	287	273	381	494	540	410	513	452	3.86289209231707	6.15283673660522	5.13311761818118	4.93083345932352	6.01554639528883	4.97796217106071	5.92026989584985	7.47034415210114	7.39319179540022	5.37933227551078	7.12768519110845
ENSMUSG00000085939	171.890587468649	166.295798550589	170.254491940949	123.137330463086	136.125058885256	150.101636877214	201.754015302669	202.416363731571	299.369913590614	184.57598604353	144.309066589317	235.74445630578	152.967484030957	211.361633593913	-0.465261332366225	0.00914379710566658	0.257102977662233	Cd63-ps	18	50267793	50268667	+	875	transcribed_processed_pseudogene	CD63 antigen, pseudogene [Source:MGI Symbol;Acc:MGI:105972]	-	166	151	185	117	100	130	201	211	346	220	162	271	7.64735339049677	7.63152374799541	7.73345024604936	5.53653618764284	5.97422507112009	6.75648307734716	8.90227454719207	9.09461905040322	13.5021431467808	8.22726699073799	6.41555977141334
ENSMUSG00000020707	202.955151469007	193.828215529163	219.950397696686	233.645191135087	174.240075373128	247.090386859413	196.7352587031	279.161904482878	304.561299375423	281.897869593755	302.870880496098	269.670780275984	211.951569677081	272.482998821206	-0.361779202894659	0.0091647000711619	0.257251725847589	Rnf135	11	80074677	80090583	+	2140	protein_coding	ring finger protein 135 [Source:MGI Symbol;Acc:MGI:1919206]	-	196	176	239	222	128	214	196	291	352	336	340	310	3.69192969955578	3.63698290892892	4.08501586942428	4.29535967109842	3.12669723348341	4.54763284052213	3.54940271735584	5.12848778781264	5.61647140782304	5.13767309956875	5.50544892118227
ENSMUSG00000067203	150.145392668398	164.093205192303	138.964477205856	135.766800254172	125.235054174436	150.101636877214	206.772771902238	268.609392629573	160.932959329059	151.85569760854	165.688187565512	210.517189763833	144.051094395396	194.062699799793	-0.427384386862154	0.00920628326443836	0.257977239264279	H2-K2	17	34193608	34197811	-	1951	transcribed_unprocessed_pseudogene	histocompatibility 2, K region locus 2 [Source:MGI Symbol;Acc:MGI:95906]	-	145	149	151	129	92	130	206	280	186	181	186	242	2.99586236721137	3.37731341253051	2.8309310921891	2.73774361681796	2.46501854549035	3.0302012776416	4.09188039079684	5.41266155246377	3.25529489418288	3.03572389370982	3.30356813788915
ENSMUSG00000051455	3.10645640003582	5.50648339571485	2.76088365309647	0	1.36125058885256	1.15462797597857	4.0150052796551	11.511831112696	4.32615482067362	11.7457445664064	8.01717036607317	9.56896317108331	2.31495033561305	8.19747821943127	-1.81129806545948	0.00938293680811212	1	Meioc	11	102554542	102573063	+	4616	protein_coding	meiosis specific with coiled-coil domain [Source:MGI Symbol;Acc:MGI:2686410]	-	3	5	3	0	1	1	4	12	5	14	9	11	0.0261979059871036	0.0479012194805857	0.0237719646071005	0	0.0113246250806544	0.0098518909023443	0.033582047426615	0.0980450237266974	0.0369861278358049	0.0992437575198326	0.0675622809549715
ENSMUSG00000074743	885.340074010209	1560.53739434559	1562.6601476526	821.9679922365	1476.95688890503	2006.74342225075	2238.36544340772	2138.32262918328	2458.12116910675	1391.87073111916	1477.83173747949	2768.90997941438	1385.70098656678	2078.9036149518	-0.585326774408747	0.00944093023290535	0.261882652877443	Thbd	2	148246386	148250108	-	3723	protein_coding	thrombomodulin [Source:MGI Symbol;Acc:MGI:98736]	-	855	1417	1698	781	1085	1738	2230	2229	2841	1659	1659	3183	9.25729712607949	16.8313588647014	16.6822363584552	8.68597013535731	15.2344343993947	21.2296155703128	23.2126544422776	22.5801666220232	26.0563068311525	14.5812351298196	15.4411962892959
ENSMUSG00000067616	13.4613110668219	11.0129667914297	11.0435346123859	19.9966605025525	8.16750353311539	13.8555357117428	14.0525184787929	25.901620003566	9.51754060548196	50.3389052845991	43.6490386597317	26.9670780275984	12.922918703008	28.4044501766283	-1.13365567318877	0.0094727232575685	0.261882652877443	Klk11	7	43424028	43428687	+	1467	protein_coding	kallikrein related-peptidase 11 [Source:MGI Symbol;Acc:MGI:1929977]	-	13	10	12	19	6	12	14	27	11	60	49	31	0.357210620875735	0.301447892464054	0.299199423657467	0.53627039378907	0.213801510725157	0.371994506382178	0.369837463002313	0.694134707856495	0.256033759644285	1.33832656941732	1.15742686931147
ENSMUSG00000001289	1069.656487079	1301.73267474699	1170.6146689129	1144.01947190919	1274.130551166	1258.54449381664	1113.16021378438	1555.05651947335	1367.06492333286	1689.70925405304	1626.59478760551	1453.61249626184	1203.11639127179	1467.5330324185	-0.287249629814485	0.00951266944853059	0.262546489955508	Pfdn5	15	102234551	102240308	+	1394	protein_coding	prefoldin 5 [Source:MGI Symbol;Acc:MGI:1928753]	-	1033	1182	1272	1087	936	1090	1109	1621	1580	2014	1826	1671	29.8709250740491	37.497047119463	33.3759747328432	32.2869561948755	35.0996437105262	35.5589655392333	30.8305840372439	43.8561346040093	38.7016049386398	47.2756660180906	45.3905654957564
ENSMUSG00000101501	0	0	0.920294551032158	1.05245581592382	1.36125058885256	2.30925595195713	7.02625923939643	3.83727703756533	0.865230964134723	5.87287228320322	2.67239012202439	13.0485861423863	0.940542817960945	5.5537692981184	-2.59461636873122	0.00955690556002392	1	Rps27a-ps1	1	52561398	52561860	+	463	processed_pseudogene	ribosomal protein S27A, pseudogene 1 [Source:MGI Symbol;Acc:MGI:3781839]	-	0	0	1	1	1	2	7	4	1	7	3	15	0	0	0.0790002797886076	0.0894291994644272	0.112903821538447	0.196442023348688	0.58590881017753	0.325828530973675	0.0737485814643954	0.494718342021109	0.224526629869077
ENSMUSG00000025764	1089.33071094589	1097.99278910554	1122.75935225923	1235.58312789456	1121.67048521451	1311.65738071165	1477.52194291308	1320.98262018187	1223.4365832865	1251.76077807703	1421.71154491698	1431.86485269119	1163.1656410219	1354.54638701111	-0.219618476996911	0.00984842354123544	0.26844813537075	Jade1	3	41510166	41571299	+	8492	protein_coding	jade family PHD finger 1 [Source:MGI Symbol;Acc:MGI:1925835]	-	1052	997	1220	1174	824	1136	1472	1377	1414	1492	1596	1646	4.99363596350944	5.19191457925144	5.25483961862846	5.72424805926554	5.07232251092509	6.08350318750958	6.71754839602236	6.11552949101501	5.68557098566572	5.74909918233656	6.51254137574561
ENSMUSG00000044197	995.101533478142	1558.3348009873	1556.21808579538	1147.17683935696	1392.55935239617	1405.18224676592	1956.31132251195	1556.97515799213	1625.76898160914	1479.96381536721	1626.59478760551	1892.91489638884	1342.42880979665	1689.75482691247	-0.331919106516266	0.00985683813189923	0.26844813537075	Gpr146	5	139363452	139382170	+	6786	protein_coding	G protein-coupled receptor 146 [Source:MGI Symbol;Acc:MGI:1933113]	-	961	1415	1691	1090	1023	1217	1949	1623	1879	1764	1826	2176	5.70848227768188	9.2211471030997	9.11463690771205	6.65078604387157	7.88045714233182	8.15571642634163	11.1304048985237	9.02017107912015	9.45469638323759	8.50600608217727	9.32426293856239
ENSMUSG00000069814	4.14194186671443	2.20259335828594	11.963829163418	11.577013975162	5.44500235541026	13.8555357117428	14.0525184787929	30.6982163005227	22.4960050675028	26.0084343970428	16.0343407321463	8.69905742825755	8.19765273845558	19.6647620673775	-1.2534073778224	0.0100378447707862	0.272477048250816	Ccdc92b	11	74510431	74532342	+	4002	protein_coding	coiled-coil domain containing 92B [Source:MGI Symbol;Acc:MGI:3588240]	-	4	2	13	11	4	12	14	32	26	31	18	10	0.0402896998289089	0.0221001528358204	0.118816262880467	0.113808823806179	0.052248345199701	0.136360804813257	0.135570104503846	0.301566436463392	0.221835438197999	0.253469421111908	0.155855816535806
ENSMUSG00000035121	69.3775262674667	61.6726140320064	75.4641531846369	105.245581592382	81.6750353311539	131.627589261557	124.465163669308	121.833545942699	96.0406370189543	98.9998470597115	195.08447890778	167.021902622545	87.5104166115337	133.907595870166	-0.614941046961018	0.0101155552480151	0.273684735339154	Neil2	14	63419892	63431305	-	5017	protein_coding	nei like 2 (E. coli) [Source:MGI Symbol;Acc:MGI:2686058]	-	67	56	82	100	60	114	124	127	111	118	219	192	0.538321625170653	0.493612662182718	0.597832294688913	0.825308338689053	0.625168061060006	1.03334690815133	0.957834693753021	0.954706171506034	0.755463593222976	0.769624473874008	1.51261223100358
ENSMUSG00000102563	0	1.10129667914297	0	0	0	0	0	5.755915556348	2.59569289240417	3.35592701897327	6.23557695139024	1.73981148565151	0.183549446523829	3.2804873174612	-3.54485189386835	0.0102025073497981	1	Gm37695	11	44501664	44507843	-	530	TEC	predicted gene, 37695 [Source:MGI Symbol;Acc:MGI:5610923]	-	0	1	0	0	0	0	0	6	3	4	7	2	0	0.0834385015556164	0	0	0	0	0	0.426958329738146	0.193276942743482	0.246959129224554	0.457667174468981
ENSMUSG00000037982	23.816165733608	16.5194501871446	12.8841237144502	12.6294697910858	6.80625294426282	16.1647916636999	16.0600211186204	34.535493338088	29.4178527805806	31.0423249255027	28.5054946349268	23.4874550562954	14.8033756723752	27.1747736423357	-0.866957148665671	0.0103615351194292	0.276365317151714	Gm9725	8	81740205	81787824	+	5266	lncRNA	predicted gene 9725 [Source:MGI Symbol;Acc:MGI:3646552]	-	23	15	14	12	5	14	16	36	34	37	32	27	0.176058949413775	0.125965835048832	0.0972426535491369	0.094354088914614	0.0496339435741557	0.120901746614717	0.117747611789787	0.257828995170396	0.220461482987564	0.229912102359167	0.210570106857846
ENSMUSG00000097222	14.4967965335005	4.40518671657188	12.8841237144502	6.31473489554289	8.16750353311539	18.4740476156571	16.0600211186204	22.0643429660007	12.1132334978861	29.3643614160161	20.4883242688537	40.0156641699847	10.7903988348063	23.3509912395603	-1.11162248953392	0.0103747337792443	0.276365317151714	Gata6os	18	10987944	11052936	-	7622	lncRNA	GATA binding protein 6, opposite strand [Source:MGI Symbol;Acc:MGI:1915684]	-	14	4	14	6	6	16	16	23	14	35	23	46	0.0740406488459101	0.0232077700469571	0.0671844415625498	0.0325943736699264	0.0411501989286021	0.0954632976231357	0.0813512101397297	0.113807006899064	0.062718224226215	0.150258850928742	0.104565034613654
ENSMUSG00000015702	56.9517006673234	70.4829874651501	66.2612076743153	115.77013975162	53.08877296525	108.535029741985	119.446407069739	186.107936321919	82.1969415927987	91.4490112670216	151.435440248049	116.567369538651	78.514973044274	124.533851006363	-0.663254828074882	0.0104517083333537	0.277380736575688	Anxa9	3	95203407	95214487	-	2073	protein_coding	annexin A9 [Source:MGI Symbol;Acc:MGI:1923711]	-	55	64	72	110	39	94	119	194	95	109	170	134	1.06948454285349	1.365284116144	1.27040681477715	2.19711969547674	0.98345600845139	2.06212005310699	2.22464459474546	3.52949473095966	1.56480046102819	1.72055341236161	2.84169336500966
ENSMUSG00000081769	89.0517501343602	124.446524743156	83.7468041439263	159.97328402042	117.067550641321	113.1535416459	161.603962506118	128.548780758439	130.649875584343	169.47431445815	176.37774805361	180.940394507757	114.573242554847	157.932512644736	-0.465590485989203	0.010454174753505	0.277380736575688	Gm12216	11	53674244	53750082	-	2647	protein_coding	predicted gene 12216 [Source:MGI Symbol;Acc:MGI:3650088]	-	86	113	91	152	86	98	161	134	151	202	198	208	1.30965116825796	1.88784732080312	1.25746837488984	2.37766125482	1.69837716887717	1.68367215100555	2.35713748378561	1.90924194547306	1.94785968111835	2.497114126821	2.59202295260267
ENSMUSG00000022096	1543.9088308178	2386.50990370282	2619.15829223752	1568.15916572648	1805.0182808185	1696.14849671251	2698.08354792823	2859.73071224557	2282.4792833874	2161.21700021879	3206.86814642927	2191.29256617808	1936.48382833594	2566.61187606455	-0.406132054151565	0.0106650000500078	0.281961021287184	Hr	14	70789652	70810988	+	6919	protein_coding	lysine demethylase and nuclear receptor corepressor [Source:MGI Symbol;Acc:MGI:96223]	-	1491	2167	2846	1490	1326	1469	2688	2981	2638	2576	3600	2519	8.68651227288995	13.8502606477296	15.0453115590242	8.91668186653048	10.0182029755269	9.65525746889291	15.0556293075709	16.2490791998649	13.0186551393444	12.1826983649262	18.0296279166439
ENSMUSG00000038976	3636.62495897527	5041.73619711652	4794.73461087754	3761.47708611172	3939.45920413932	4333.31879384756	5880.97898337481	5296.40163109955	4805.49277480425	4593.42510721966	4845.04329123022	5368.18833897773	4251.22514184465	5131.58835445104	-0.271365244063645	0.010678137845676	0.281961021287184	Ppp1r9b	11	94881861	94897725	+	5083	protein_coding	protein phosphatase 1, regulatory subunit 9B [Source:MGI Symbol;Acc:MGI:2387581]	-	3512	4578	5210	3574	2894	3753	5859	5521	5554	5475	5439	6171	27.8513032681542	39.8288754405773	37.4910180827214	29.1135236994205	29.7624069178514	33.5771513879196	44.6700427143239	40.9645084069999	37.3095858219272	35.2456056082702	37.0788745068013
ENSMUSG00000022559	547.771811872983	504.393879047481	509.843181271815	455.713368295012	461.463949621019	593.478779652983	534.999453514042	655.215054164281	554.613048010358	666.151513266194	617.322118187634	656.778835833445	512.110828293549	614.180003829326	-0.262105745569873	0.0108548338230948	0.283691169125775	Fbxl6	15	76419921	76422946	-	2170	protein_coding	F-box and leucine-rich repeat protein 6 [Source:MGI Symbol;Acc:MGI:1354705]	-	529	458	554	433	339	514	533	683	641	794	693	755	9.8266856382938	9.33357689751628	9.33812431628453	8.26206289374603	8.16638023834561	10.7718123503612	9.51876170288352	11.8705565116676	10.0863250012662	11.9729655253775	11.0662657347408
ENSMUSG00000043510	112.867915867968	111.23096459344	109.515051572827	92.6161118012957	147.015063596077	137.400729141449	110.412645190515	163.084274096527	153.145880651846	182.898022534043	205.774039395878	151.363599251681	118.440972762176	161.113076853415	-0.449449716409318	0.0108813994590939	0.283691169125775	Hscb	5	110976936	110987643	-	905	protein_coding	HscB iron-sulfur cluster co-chaperone [Source:MGI Symbol;Acc:MGI:2141135]	-	109	101	119	88	108	119	110	170	177	218	231	174	4.85499786739419	4.93531821908524	4.80958940940654	4.026191495004	6.23827921790993	5.97976030963683	4.71039237606023	7.08452035164033	6.67819889457311	7.88222590900689	8.84486064249998
ENSMUSG00000042312	431.797439604979	463.645901919191	511.68377037388	335.733405279697	490.050211986923	517.273333238398	398.489274005769	601.493175638366	787.360177362598	672.863367304141	526.460854038805	693.314877032127	458.364010400511	613.330287563634	-0.420995225272911	0.0110279970371355	0.285732811414011	S100a13	3	90421742	90431888	+	715	protein_coding	S100 calcium binding protein A13 [Source:MGI Symbol;Acc:MGI:109581]	-	417	421	556	319	360	448	397	627	910	802	591	797	23.5093779455515	26.038647345601	28.4431944411492	18.4733209416748	26.3200125510885	28.4942589168379	21.517779082426	33.0728490804856	43.4580277320192	36.7036529609052	28.6423754363475
ENSMUSG00000030717	830.459344276243	1057.24481197725	1259.88324036302	889.325164455624	820.834105078097	855.579330200118	983.6762935155	1376.62313722656	1528.86311362606	1047.04922991966	1402.11401735546	1091.73170724632	952.220999391726	1238.34291648159	-0.378421233722865	0.0111992277334158	0.289231466086978	Nupr1	7	126222421	126230033	-	2514	protein_coding	nuclear protein transcription regulator 1 [Source:MGI Symbol;Acc:MGI:1891834]	-	802	960	1369	845	603	741	980	1435	1767	1248	1574	1255	12.8593856135308	16.8868375463395	19.9180948063523	13.9171968386894	12.5383870451461	13.4041206635915	15.1068452966219	21.5276556405693	23.9997069276979	16.2438988100924	21.6953693763788
ENSMUSG00000033088	951.61114387764	1260.9846976187	1358.35475732346	1111.39334161555	1188.37176406829	1228.5241664412	1450.42065727541	1448.57208168091	1377.44769490248	1305.4556103806	1313.92514332866	1520.59523845942	1183.20664515747	1402.73607100458	-0.245314809176394	0.0113138144611248	0.28991869498593	Triobp	15	78831924	78890069	+	12302	protein_coding	TRIO and F-actin binding protein [Source:MGI Symbol;Acc:MGI:1349410]	-	919	1145	1476	1056	873	1064	1445	1510	1592	1556	1475	1748	3.01127843113629	4.1159693276724	4.38854196099634	3.55425456313961	3.70960914989584	3.93324771770081	4.55202987687395	4.62925745528422	4.41877616672736	4.13880374510049	4.15474038647753
ENSMUSG00000030865	300.290785336796	327.085113705462	346.030751188091	275.74342377204	272.250117770513	385.645743976841	337.260443491028	447.042774876361	447.324408457652	401.872260522049	383.042584156829	356.66135455856	317.840989291624	395.533971010413	-0.314747130711289	0.0114727098802111	0.292625140396654	Chp2	7	121818719	121822047	+	1603	protein_coding	calcineurin-like EF hand protein 2 [Source:MGI Symbol;Acc:MGI:1917511]	-	290	297	376	262	200	334	336	466	517	479	430	410	7.29248593690503	8.19342141601346	8.57953880713607	6.76749748610843	6.52207977196517	9.47541714743849	8.12304266836271	10.9638353377758	11.012646097139	9.77784063260098	9.29528108559672
ENSMUSG00000058135	2537.97487882927	3501.0221429955	3766.76559737462	2797.4275587255	4663.64451740889	5121.92970144092	4603.20355312457	4670.9254739764	4833.18016565656	5528.05078200372	4660.64837281054	5352.53003560687	3731.46073279578	4941.42306386311	-0.405412631199933	0.0114995968485942	0.292857584658867	Gstm1	3	107919571	107925289	-	1473	protein_coding	glutathione S-transferase, mu 1 [Source:MGI Symbol;Acc:MGI:95860]	-	2451	3179	4093	2658	3426	4436	4586	4869	5586	6589	5232	6153	67.0736112069219	95.439937621189	101.63624658243	74.7158194417483	121.583389049221	136.953830825228	120.654710795125	124.665745301241	129.488990981556	146.371904668043	123.081443906072
ENSMUSG00000025316	208.1325788024	279.729356502315	219.950397696686	232.592735319163	269.527616592808	249.39964281137	289.080380135167	374.13451116262	269.086829845899	315.457139783487	316.23283110622	260.101817104901	243.22205462079	304.015584856382	-0.323721174910063	0.011624384585922	0.294223883901804	Banp	8	122676489	122755997	+	6632	protein_coding	BTG3 associated nuclear protein [Source:MGI Symbol;Acc:MGI:1889023]	-	201	254	239	221	198	216	288	390	311	376	355	299	1.22169462913804	1.6936808020834	1.31814444520023	1.3797744235221	1.56066720984855	1.48113494202771	1.68291022713063	2.21783993659215	1.60121825856494	1.85517246953668	1.85486125444466
ENSMUSG00000035397	225.735831735936	190.524325491734	258.602768840036	227.330456239544	176.962576550833	200.905267820271	278.039115616116	294.511012633139	264.760675025225	205.550529912113	318.014424520902	277.499931961416	213.343537779726	273.062614944819	-0.351803175576433	0.0116857095982233	0.295259627569245	Klf16	10	80402958	80413155	-	2674	protein_coding	Kruppel-like factor 16 [Source:MGI Symbol;Acc:MGI:2153049]	zf-C2H2	218	173	281	216	130	174	277	307	306	245	357	319	3.28629249812397	2.86106066104505	3.84374472750083	3.34466543756112	2.54139155512308	2.95919264865688	4.014498921577	4.32999188679218	3.90746130318347	2.99809675858343	4.6263065541872
ENSMUSG00000026398	79.7323809342528	39.646680449147	48.7756112047044	43.1506884528764	81.6750353311539	41.5666071352284	165.618967785773	166.921551134092	48.4529339915445	67.1185403794654	98.8784345149024	59.1535905121513	55.7578339178938	101.024003052988	-0.857905613813033	0.0117053436432893	0.295259627569245	Nr5a2	1	136770309	136888186	-	5899	protein_coding	nuclear receptor subfamily 5, group A, member 2 [Source:MGI Symbol;Acc:MGI:1346834]	SF-like	77	36	53	41	60	36	165	174	56	80	111	68	0.526166814760027	0.269877370686754	0.328629914516468	0.287783436757624	0.53169489105578	0.277529720730287	1.08397315655226	1.11245118292512	0.324148706595837	0.443764497335187	0.652036903930694
ENSMUSG00000022762	1.03548546667861	11.0129667914297	6.4420618572251	13.6819256070096	10.8900047108205	17.3194196396785	26.0975343177582	22.0643429660007	30.2830837447153	9.22879930217649	48.103022196439	13.0485861423863	10.0636440121403	24.8042281115793	-1.30997620305013	0.0117680107913149	0.295259627569245	Ncam2	16	80997585	81423716	+	11330	protein_coding	neural cell adhesion molecule 2 [Source:MGI Symbol;Acc:MGI:97282]	-	1	10	7	13	8	15	26	23	35	11	54	15	0.0035577974120762	0.0390312496244278	0.0225984030710395	0.0475087688946502	0.0369104814632309	0.0602069661145913	0.0889316638118409	0.0765610773684613	0.105480649834998	0.0317690141963625	0.165154892615083
ENSMUSG00000008682	7919.39284915799	7792.77530161566	7362.35640825726	7890.26125198084	7394.31319864713	8314.47605502166	7747.95643841443	9053.09585087601	8990.61494832391	8852.09649429674	8959.63328244044	8632.94459180279	7778.92917744676	8706.05693435905	-0.162493153271171	0.0117725665872771	0.295259627569245	Rpl10	X	73314418	73316741	+	2053	protein_coding	ribosomal protein L10 [Source:MGI Symbol;Acc:MGI:105943]	-	7648	7076	8000	7497	5432	7201	7719	9437	10391	10551	10058	9924	150.165461326664	152.419748472478	142.531435137361	151.202473444797	138.312185889108	159.51049237506	145.708561614852	173.36248186407	172.823604056695	168.168882050363	169.765827961087
ENSMUSG00000036158	278.545590536545	306.160476801746	376.400471372152	327.313758752307	280.417621303628	305.97641363432	410.534289844734	372.215872643837	337.440076012542	331.39779312361	439.162776719341	426.25381398462	312.469055400117	386.167437054781	-0.302968199284948	0.0118382988880977	0.296443238266239	Prickle1	15	93396995	93493772	-	4345	protein_coding	prickle planar cell polarity protein 1 [Source:MGI Symbol;Acc:MGI:1916034]	-	269	278	409	311	206	265	409	388	390	395	493	490	2.4955922252252	2.82941975125536	3.44304855759016	2.96367749562285	2.47837530280644	2.77358504657851	3.64793008899846	3.36784468459349	3.06485186536844	2.9747349656594	3.93173947121486
ENSMUSG00000034863	679.278466141167	810.554355849227	785.931546581463	635.683312817984	784.080339179077	874.053377815775	1025.83384895188	964.11585568829	876.478966668475	827.236010176911	946.916899903976	832.499795884248	761.596899730782	912.18022954563	-0.260346968558397	0.0119011087749187	0.297112983764145	Ano8	8	71928663	71938607	-	6847	protein_coding	anoctamin 8 [Source:MGI Symbol;Acc:MGI:2687327]	-	656	736	854	604	576	757	1022	1005	1013	986	1063	957	3.86202104707289	4.75356954678178	4.56212481801885	3.65255651944297	4.39756015166427	5.02783417595334	5.78446965830008	5.53574203629384	5.05177244484435	4.71213311487393	5.37973063122701
ENSMUSG00000045664	491.855596672339	680.601347710356	634.082945661157	458.870735742783	562.196493196109	479.170610031105	763.854754454383	672.482800833325	668.823535276141	679.575221342087	717.982146117219	587.186376407385	551.129621502308	681.650805738423	-0.30608541996621	0.0119399953827056	0.297219713374665	Cdc42ep2	19	5965664	5974844	-	3411	protein_coding	CDC42 effector protein (Rho GTPase binding) 2 [Source:MGI Symbol;Acc:MGI:1929744]	-	475	618	689	436	413	415	761	701	773	810	806	675	5.61336154278542	8.01215092334406	7.38834425521089	5.29255163807827	6.32933328958084	5.53288662801724	8.64601364930189	7.75079782310239	7.73806612651001	7.77041587335832	8.18805811407042
ENSMUSG00000021094	1007.52735907829	1231.24968728184	1297.61531695534	1048.24599266012	1046.80170282762	1313.96663666361	1507.63448251049	1740.20513653588	1426.76585985816	1344.04877109879	1225.73626930185	1257.01379838322	1157.5677825778	1416.90071961473	-0.29111715334421	0.0119775377605618	0.297219713374665	Dhrs7	12	72697127	72711683	-	3541	protein_coding	dehydrogenase/reductase (SDR family) member 7 [Source:MGI Symbol;Acc:MGI:1913625]	-	973	1118	1410	996	769	1138	1502	1814	1649	1602	1376	1445	11.0763848835061	13.9623410651694	14.5647423480364	11.646454807857	11.3524617190905	14.6150979172951	16.4383031519151	19.3206381143203	15.901181365859	14.8039479143886	13.4654261103296
ENSMUSG00000032067	618.184823607129	677.297457672927	625.800294701867	774.607480519928	758.216577990879	747.044300458133	731.734712217142	768.414726772458	805.530027609427	863.312225630874	944.244509781951	887.30385768227	700.19182249181	833.423343282354	-0.252810332468676	0.0120004054332635	0.297339368908094	Pts	9	50432917	50440024	-	6101	protein_coding	6-pyruvoyl-tetrahydropterin synthase [Source:MGI Symbol;Acc:MGI:1338783]	-	597	615	680	736	557	647	729	801	931	1029	1060	1020	3.94443161338429	4.45775767612738	4.07678218138752	4.99501875808784	4.77247655144592	4.82268226162566	4.63062362078327	4.95155492880225	5.21054700638781	5.51893543292882	6.02049824657957
ENSMUSG00000073607	3.10645640003582	4.40518671657188	1.84058910206432	9.47210234331434	4.08375176655769	4.61851190391427	8.0300105593102	16.3084274096527	13.8436954261556	13.4237080758931	7.12637365873171	9.56896317108331	4.58776637207639	11.3835297168044	-1.31886031463182	0.0120280750374136	1	Gm10548	18	34340828	34354825	-	2629	transcribed_processed_pseudogene	predicted gene 10548 [Source:MGI Symbol;Acc:MGI:3641893]	-	3	4	2	9	3	4	8	17	16	16	8	11	0.0459983012691023	0.0672839951684697	0.0278258878220809	0.141746471726234	0.0596513534107655	0.0691918271665596	0.117926763728608	0.243875653032883	0.20780885944779	0.199145437031592	0.105445243696597
ENSMUSG00000035595	88.0162646676816	107.927074556011	84.6670986949585	111.560316487924	93.926290630827	123.545193429707	102.382634631205	145.816527427483	143.628340046364	163.601442174947	138.073489637927	117.437275281477	101.607039744518	135.1566181999	-0.41476399950511	0.0120491913180359	0.297652961540146	Fam174c	10	80008778	80010980	+	678	protein_coding	family with sequence similarity 174, member C [Source:MGI Symbol;Acc:MGI:1917020]	-	85	98	92	106	69	107	102	152	166	195	155	135	5.05359409690263	6.39202916047008	4.96326831545063	6.47346054766247	5.31996812195982	7.17694268341987	5.83020005677287	8.45520232146142	8.36013049290634	9.4112190285242	7.92190442111816
ENSMUSG00000046364	4372.85512578376	4422.80746343817	3817.38179768139	3704.64447205183	3714.85285697865	4311.38086230397	3542.23840797571	5091.10730958981	5237.24302590748	5756.2538192939	5416.0439806361	4807.09913485512	4057.32042970629	4974.99761304302	-0.294239588442789	0.0122054377130272	0.300162682384402	Rpl27a	7	109118354	109121574	+	2774	protein_coding	ribosomal protein L27A [Source:MGI Symbol;Acc:MGI:1347076]	-	4223	4016	4148	3520	2729	3734	3529	5307	6053	6861	6080	5526	61.365708031244	64.0220554401941	54.6942802237692	52.54078302781	51.4264696889001	61.2143512130844	49.3012784265599	72.1527255249809	74.5073092100379	80.9323080725596	75.9494645694122
ENSMUSG00000019768	725.875312141704	796.237499020368	632.242356559092	867.223592321224	950.15291101909	592.324151677005	1399.2293399598	858.590737155244	796.87771796808	980.769671294938	1106.3695105181	888.173763425096	760.675970456414	1005.00179005354	-0.402233281018999	0.0123275427670322	0.30181414884456	Esr1	10	4561593	4955614	+	13661	protein_coding	estrogen receptor 1 (alpha) [Source:MGI Symbol;Acc:MGI:1352467]	ESR-like	701	723	687	824	698	513	1394	895	921	1169	1242	1021	2.06845773514788	2.3404435554569	1.83943254486788	2.49749745597486	2.67093035808989	1.7077341682072	3.95451531557407	2.47087431021753	2.30203435720605	2.80009640022064	3.15040725177985
ENSMUSG00000079605	0	1.10129667914297	0.920294551032158	0	0	1.15462797597857	8.0300105593102	0.959319259391334	0.865230964134723	8.38981754743318	6.23557695139024	1.73981148565151	0.529369867692283	4.3699611278852	-3.00212373336938	0.0127494986282117	1	Zbtb9	17	27192141	27227350	+	3482	protein_coding	zinc finger and BTB domain containing 9 [Source:MGI Symbol;Acc:MGI:1918022]	-	0	1	1	0	0	1	8	1	1	10	7	2	0	0.0127002888640082	0.0105046322636776	0	0	0.0130604044816833	0.0890377546934262	0.0108313189144753	0.00980631626019962	0.0939749701960177	0.0696621488996439
ENSMUSG00000079593	60.0581570673592	77.090767540008	128.841237144502	75.7768187465147	80.3137847423013	124.699821405685	96.3601267117224	157.328358540179	132.380337512613	141.787916551621	114.912775247049	152.233504994507	91.1300977743951	132.500503259615	-0.538570902677761	0.0128510575230271	0.307256809775568	4933416I08Rik	X	52576568	52610946	-	1374	protein_coding	RIKEN cDNA 4933416I08 gene [Source:MGI Symbol;Acc:MGI:1918409]	-	58	70	140	72	59	108	96	164	153	169	129	175	1.70158005194451	2.25296099542458	3.72692731870273	2.16973201844698	2.24468245485135	3.57455856460254	2.70768088945424	4.50160335041723	3.80223854611085	4.02476877813742	3.25334837995885
ENSMUSG00000008384	207.097093335721	214.752852432879	211.667746737396	189.442046866287	238.218853049199	217.070059483971	271.012856376719	238.870495588442	271.682522738303	320.491030311947	266.348215495098	212.257001249484	213.041441984242	263.443686959999	-0.308734539523446	0.012932447529533	0.30743618444093	Sertad1	7	27186335	27189741	+	1344	protein_coding	SERTA domain containing 1 [Source:MGI Symbol;Acc:MGI:1913438]	-	200	195	230	180	175	188	270	249	314	382	299	244	5.99848879149157	6.41619727364059	6.25947901390538	5.5454088417897	6.80657153285167	6.36127212811131	7.78533804850053	6.98731284418938	7.97746746313745	9.30047345662261	7.70902605634561
ENSMUSG00000022543	17.6032529335363	19.8233402245735	28.5291310819969	29.4687628458668	27.2250117770513	20.7833035676142	31.116290917327	48.925282228958	19.9003121750986	50.3389052845991	43.6490386597317	44.3651928841135	23.9054670717732	39.7158370249713	-0.732693353050884	0.0129676608719091	0.30743618444093	Dnaaf8	16	4782090	4796826	+	5846	transcribed_unitary_pseudogene	dynein axonemal assembly factor 8 [Source:MGI Symbol;Acc:MGI:1921934]	-	17	18	31	28	20	18	31	51	23	60	49	51	0.117219869917892	0.136162043250185	0.193960146391701	0.198316822076092	0.178838417284642	0.140022906482036	0.205501909791263	0.329019376577206	0.134339487515283	0.335840759037838	0.29044564099896
ENSMUSG00000038793	25.8871366669652	39.646680449147	56.1379676129616	23.1540279503239	36.7537658990192	23.0925595195713	28.1050369575857	49.8846014883493	56.240012668757	76.3473396816419	64.1373629285854	71.3322709117119	34.1120230163314	57.6744374394385	-0.756240563694975	0.0130326515964556	0.307708047578515	Lefty1	1	180762587	180765965	+	1758	protein_coding	left right determination factor 1 [Source:MGI Symbol;Acc:MGI:107405]	-	25	36	61	22	27	20	28	52	65	91	72	82	0.573234423760286	0.905578276269147	1.26917229924326	0.518160310434957	0.802850212202572	0.517364373210708	0.617237267604542	1.11556423659303	1.26249349213366	1.69380529045794	1.41919221337041
ENSMUSG00000021732	1121.43076041293	1312.74564153842	1352.83299001727	1125.07526722256	1158.42425111353	1140.77244026682	1360.08303848317	1964.68584323345	1027.89438539205	1902.81061975784	1526.82555638327	1501.45731211725	1201.88022509526	1547.29279256117	-0.364267169339588	0.0130351530745769	0.307708047578515	Fgf10	13	118806327	118928651	+	4601	protein_coding	fibroblast growth factor 10 [Source:MGI Symbol;Acc:MGI:1099809]	-	1083	1192	1470	1069	851	988	1355	2048	1188	2268	1714	1726	9.48827685006861	11.4568806222074	11.6862378671863	9.62023777164091	9.66867494801739	9.76540153539635	11.4130058899316	16.7875697106054	8.81655395414082	16.1299039172507	12.9088090983672
ENSMUSG00000036790	10.3548546667861	1.10129667914297	0.920294551032158	8.41964652739052	2.72250117770513	1.15462797597857	21.0787777181893	23.9829814847833	2.59569289240417	15.940653340123	25.8331045129024	2.60971722847726	4.11220359633924	15.3401545294799	-1.8890275735718	0.0131202693607017	1	Slitrk2	X	65692924	65704999	+	8080	protein_coding	SLIT and NTRK-like family, member 2 [Source:MGI Symbol;Acc:MGI:2679449]	-	10	1	1	8	2	1	21	25	3	19	29	3	0.0498884216322071	0.00547307002778177	0.00452687246808482	0.040995761734683	0.0129392250921537	0.00562825846599273	0.100721205115914	0.116691375186271	0.0126778192641145	0.076945496017675	0.124369598153965
ENSMUSG00000063457	4411.16808805087	4562.67214168933	4049.29602454149	4278.23289173031	4109.61552774589	4414.14275216606	3918.64515294338	5353.96078666303	5035.64421126409	5589.29645009998	5259.263760144	5091.55831275914	4304.18790432066	5041.39477897894	-0.228182310890722	0.0131670483851255	0.310376904494583	Rps15	10	80128287	80129948	+	630	protein_coding	ribosomal protein S15 [Source:MGI Symbol;Acc:MGI:98117]	-	4260	4143	4400	4065	3019	3823	3904	5581	5820	6662	5904	5853	272.571330685377	290.814964017154	255.459317437066	267.165474866668	250.502576245994	275.961910306605	240.149805363722	334.103929175226	315.440242109282	346.023059926114	324.738210651786
ENSMUSG00000062006	2574.21687016302	2327.0398830291	2315.46109039691	2872.15192165609	1883.97081497195	2685.66467212615	2250.41045924668	3042.96069078931	3193.56748862126	3567.35042116859	3320.89012496898	2940.28141075105	2443.08420872387	3052.57676592431	-0.321222306771811	0.0132415202499112	0.310798474583741	Rpl34	3	130520480	130524047	-	2643	protein_coding	ribosomal protein L34 [Source:MGI Symbol;Acc:MGI:1915686]	-	2486	2113	2516	2729	1384	2326	2242	3172	3691	4252	3728	3380	37.9153514459156	35.3545000026936	34.8195451865257	42.7530110146384	27.3733884265094	40.0219220092867	32.8739147489078	45.2632908073264	47.6849733513786	52.6425667097319	48.877201773028
ENSMUSG00000035513	604.723512540307	676.196160993784	714.148571600954	584.112977837717	616.646516750212	738.961904626283	864.22988644576	742.513106768892	736.311550478649	776.897104892312	696.603025141024	818.581303999036	655.79827405821	772.522662954279	-0.235681974401212	0.0132771721276534	0.31100290941633	Ntng2	2	29084553	29143017	-	3990	protein_coding	netrin G2 [Source:MGI Symbol;Acc:MGI:2159341]	-	584	614	776	555	453	640	861	774	851	926	782	941	5.89998729133655	6.80515217449341	7.11374749992212	5.7594421655079	5.93492095881009	7.29444866650166	8.36263679969928	7.31607543964839	7.28268166128592	7.59414795995154	6.79143348121783
ENSMUSG00000022216	1265.36324028126	1415.16623269872	1546.09484573402	1271.36662563597	1178.84300994632	1324.35828844742	1241.64038273334	1759.39152172371	1777.18440033272	1768.57353899891	1536.62432016402	1585.83816917135	1333.53204045728	1611.54205552068	-0.27287289693965	0.0132933396269293	0.31100290941633	Psme1	14	55815580	55818986	+	2209	protein_coding	proteasome (prosome, macropain) activator subunit 1 (PA28 alpha) [Source:MGI Symbol;Acc:MGI:1096367]	-	1222	1285	1680	1208	866	1147	1237	1834	2054	2108	1725	1823	22.2990630138172	25.7246679422601	27.8178259985381	22.6428741409018	20.4932958245417	23.6131048803933	21.7013605873237	31.3122103268502	31.7496824218212	31.225963958221	27.0595753901744
ENSMUSG00000045932	362.419913337513	416.290144716043	448.183446352661	299.949907538287	424.710183722	420.284583256198	457.710601880682	461.432563767231	461.168103883807	479.897563713178	484.593408793756	523.683257181105	395.306363153784	478.080916536626	-0.275013394056189	0.0133495539382462	0.31100290941633	Ifit2	19	34528094	34553819	+	3927	protein_coding	interferon-induced protein with tetratricopeptide repeats 2 [Source:MGI Symbol;Acc:MGI:99449]	-	350	378	487	285	312	364	456	481	533	572	544	602	3.59267777886126	4.25670216492289	4.53604840514771	3.00499873066679	4.15320459489632	4.21527464718628	4.50004566463536	4.61949270011653	4.63447954805247	4.76624201780721	4.80026918923557
ENSMUSG00000053004	16.5677674668577	38.545383770004	36.8117820412863	17.8917488707049	40.8375176655769	68.1230505827355	62.2325818346541	65.2337096386107	79.6012487003945	46.9829782656258	53.4478024404878	66.1128364547574	36.4628750661942	62.2685262224217	-0.777822978768331	0.0133926165092663	0.31100290941633	Hrh1	6	114374897	114460257	+	4450	protein_coding	histamine receptor H1 [Source:MGI Symbol;Acc:MGI:107619]	-	16	35	40	17	30	59	62	68	92	56	60	76	0.144934273002511	0.347816675023974	0.328783186895509	0.158179152580788	0.352412153071691	0.602944578855743	0.539938950399877	0.576313790403101	0.705931365406154	0.411783536819368	0.467217211817451
ENSMUSG00000063011	10.3548546667861	5.50648339571485	1.84058910206432	1.05245581592382	24.5025105993462	6.9277678558714	11.0412645190515	24.9423007441747	7.78707867721251	14.2626898306364	117.585165369073	7.8291516854318	8.36411023928444	30.57460847093	-1.89151486701902	0.0134108337462944	0.31100290941633	Msln	17	25967587	25973352	-	3064	protein_coding	mesothelin [Source:MGI Symbol;Acc:MGI:1888992]	-	10	5	2	1	18	6	11	26	9	17	132	9	0.131559545296421	0.0721645003663131	0.0238754109282802	0.013513615976511	0.307095446704117	0.0890528624123132	0.139128756538333	0.320032951685795	0.100297108016363	0.181552036089526	1.49283828449505
ENSMUSG00000041479	227.806802669294	135.459491534585	130.681826246566	137.87171188602	111.62254828591	105.07114581405	190.712750783617	270.528031148356	160.932959329059	190.448858326733	182.613325005	203.557943821227	141.418921072738	199.798978068999	-0.495392509888489	0.0134201049095716	0.31100290941633	Syt15	14	33941552	33952377	+	5164	protein_coding	synaptotagmin XV [Source:MGI Symbol;Acc:MGI:2442166]	-	220	123	142	131	82	91	190	282	186	227	205	234	1.71730554402423	1.05332221464187	1.00580023140624	1.05037746613399	0.830074842859928	0.801383788705487	1.42587136304408	2.05955305843866	1.22987613062564	1.43840302270556	1.37560967428502
ENSMUSG00000105139	21.7451948002508	22.0259335828594	17.485596469611	33.6785861095621	10.8900047108205	40.4119791592498	30.1125395974133	56.5998363040887	29.4178527805806	39.4321424729359	47.2122254890976	52.1943445695453	24.3728824720589	42.4948235356102	-0.798600757029613	0.0135182944250466	0.312399631474743	Gm19391	3	109027849	109030211	-	2363	lncRNA	predicted gene, 19391 [Source:MGI Symbol;Acc:MGI:5011576]	-	21	20	19	32	8	35	30	59	34	47	53	60	0.358233913777101	0.374290358226633	0.294103030596861	0.560720702185761	0.176976620811852	0.673580826992274	0.492006128611685	0.94166927429199	0.491303499539785	0.650841293798523	0.777212437629749
ENSMUSG00000072849	2.07097093335722	1.10129667914297	2.76088365309647	4.20982326369526	9.52875412196795	4.61851190391427	7.02625923939643	13.4304696314787	4.32615482067362	20.9745438685829	25.8331045129024	3.47962297130302	4.04837342586236	12.5116925073895	-1.66381694248729	0.013591145134598	1	Serpina1e	12	103913190	103925234	-	1617	protein_coding	serine (or cysteine) peptidase inhibitor, clade A, member 1E [Source:MGI Symbol;Acc:MGI:891967]	-	2	1	3	4	7	4	7	14	5	25	29	4	0.0498575691760338	0.0273484266075923	0.0678610937701769	0.102426021897414	0.226296404209094	0.112495555733386	0.167764860304389	0.326533787534224	0.105583157755149	0.505907307084932	0.621463421820677
ENSMUSG00000042672	131.506654268183	188.321732133448	146.326833614113	159.97328402042	178.323827139686	176.658080324721	174.652729664997	188.026574840701	191.216043073774	222.330165006979	383.933380864171	217.476435706439	163.518401916762	229.605888192843	-0.491831762749901	0.0135968291234954	0.31377444463282	Dcst1	3	89257526	89272560	-	5241	protein_coding	DC-STAMP domain containing 1 [Source:MGI Symbol;Acc:MGI:1925022]	-	127	171	159	152	131	153	174	196	221	265	431	250	0.976788833087305	1.44286040755305	1.10966678061399	1.20085276502739	1.30661238079973	1.32758600381585	1.2866133934506	1.4104315745468	1.43983516527024	1.65452250045738	2.84964463335649
ENSMUSG00000107655	108.725974001254	89.2050310105807	165.653019185788	116.822595567544	118.428801230173	136.246101165471	178.667734944652	181.311340024962	115.075718229918	140.109953042134	179.050138175634	257.492099876423	122.513587026802	175.284497382287	-0.514687759804284	0.0136647676241574	0.314901225375163	Gm44220	6	93218701	93221187	+	2487	TEC	predicted gene, 44220 [Source:MGI Symbol;Acc:MGI:5690612]	-	105	81	180	111	87	118	178	189	133	167	201	296	1.70186316496842	1.44029548523627	2.64731938784984	1.84802366227395	1.82866056911547	2.15770275505272	2.77368537434493	2.86613161036524	1.82604097225412	2.19726101001862	2.80057924614743
ENSMUSG00000056144	184.316413068792	165.194501871446	181.298026553335	183.127311970744	208.271340094442	207.833035676142	166.622719105687	270.528031148356	243.129900921857	231.558964309156	261.89423195839	254.882382647946	188.340104872484	238.102705015232	-0.341036613509414	0.0137480375502514	0.3160766153314	Trim34a	7	103893664	103911441	+	2592	protein_coding	tripartite motif-containing 34A [Source:MGI Symbol;Acc:MGI:2137359]	-	178	150	197	174	153	180	166	282	281	276	294	293	2.76819149414759	2.55916700373129	2.77997473757666	2.77955060465015	3.08564576155942	3.1580783614737	2.48191023658645	4.10321450377208	3.70174062278636	3.48429604773994	3.93042874370352
ENSMUSG00000043501	10.3548546667861	9.91167011228674	15.6450073675467	7.36719071146671	12.2512552996731	12.7009077357642	16.0600211186204	30.6982163005227	19.9003121750986	17.6186168496097	27.6146979275854	14.7883976280378	11.3718143155873	21.1133769999124	-0.888707688788069	0.0138474956826734	0.317336837779429	Lgals2	15	78735060	78739729	-	592	protein_coding	lectin, galactose-binding, soluble 2 [Source:MGI Symbol;Acc:MGI:895068]	-	10	9	17	7	9	11	16	32	23	21	31	17	0.680909538493637	0.672300088547788	1.05035676050022	0.489594654500352	0.794713216808627	0.844999345367287	1.04739683054902	2.03862986271367	1.32660243921342	1.16074962342453	1.81454432348585
ENSMUSG00000003184	893.623957743638	1025.30720828211	984.715169604409	929.318485460729	946.069159252533	965.268987918082	989.698801434982	1272.05733795291	1173.25318736668	1256.79466860549	931.773355879171	1169.15331835781	957.383828043583	1132.12177826618	-0.242025542220749	0.0139524970590638	0.319293705771725	Irf3	7	44647072	44652272	+	3442	protein_coding	interferon regulatory factor 3 [Source:MGI Symbol;Acc:MGI:1859179]	IRF	863	931	1070	883	695	836	986	1326	1356	1498	1046	1344	10.1067390929182	11.9613770547902	11.3705777484236	10.6220947669501	10.5551296379283	11.0453836568173	11.101432647324	14.5292356659585	13.4518955269112	14.2410467066053	10.5304859376656
ENSMUSG00000079435	1401.01183641616	1153.05762306269	966.309278583765	1134.54736956587	875.284128632199	1166.17425573835	912.409949801622	1400.60611871135	1602.40774557751	1818.07346252877	1688.95055711941	1413.59683209185	1116.06408199984	1472.67411097175	-0.400013941484635	0.0139716430091287	0.319293705771725	Rpl36a	X	133486403	133488811	+	1655	protein_coding	ribosomal protein L36A [Source:MGI Symbol;Acc:MGI:1201789]	-	1353	1047	1050	1078	643	1010	909	1460	1852	2167	1896	1625	32.9542113899988	27.9763497874484	23.2060338484783	26.9700093422889	20.3096578890571	27.7529254920081	21.285255348553	33.2709320796956	38.2100535587697	42.8451706201952	39.6979361485015
ENSMUSG00000072568	389.342535471156	264.311202994313	297.255139983387	370.464447205183	292.668876603301	247.090386859413	450.684342641285	471.985075620536	295.908989734075	451.372184051905	521.116073794756	311.42625593162	310.188764852792	417.08215362903	-0.426055889185394	0.014138307370472	0.321763660971364	Lratd2	15	60690843	60725627	-	5926	protein_coding	LRAT domain containing 1 [Source:MGI Symbol;Acc:MGI:3026924]	-	376	240	323	352	215	214	449	492	342	538	585	358	2.55762767452541	1.7909850485782	1.99365724638989	2.45946898614824	1.89655938492148	1.64224338149128	2.93628139485502	3.13121988025984	1.97060291605824	2.97071912365378	3.42075375931989
ENSMUSG00000056602	2695.36866976442	3396.39895847692	3186.05973567333	2826.89632157137	2853.18123423498	3208.71114524444	4028.05404681398	3169.59083302897	3261.05550382377	3365.99480003019	3604.16347790356	3836.28432586158	3027.76934416091	3544.19049791034	-0.227071233014902	0.0142433707890379	0.322817084581813	Fry	5	150042110	150421218	+	29729	protein_coding	FRY microtubule binding protein [Source:MGI Symbol;Acc:MGI:2443895]	-	2603	3084	3462	2686	2096	2779	4013	3304	3769	4012	4046	4410	3.52943340505826	4.58750376947378	4.25947803406902	3.7409856429598	3.68553559838348	4.25102481207272	5.23120618913347	4.19150364050289	4.3289293564768	4.41592396328435	4.71599321291761
ENSMUSG00000114709	15.5322820001791	31.9376036951462	29.449425633029	34.7310419254859	25.8637611881987	17.3194196396785	32.1200422372408	27.8202585223487	38.0701624219278	47.8219600203691	45.4306320744146	69.5924594260604	25.8055890136196	43.4759191170602	-0.753385474711125	0.014296728086939	0.323137433043202	Gm47920	14	25460404	25462811	+	1476	lncRNA	predicted gene, 47920 [Source:MGI Symbol;Acc:MGI:6097174]	-	15	29	32	33	19	15	32	29	44	57	51	80	0.409652893077473	0.868868407120477	0.793000098474262	0.925737627789284	0.672909836093303	0.462157808996151	0.840188243475637	0.74100604427228	1.01789031273216	1.26365773947726	1.19732324098883
ENSMUSG00000074733	471.145887338766	447.126451732046	404.009307903117	535.700010305222	390.678919000686	514.964077286441	555.074479912318	615.882964529236	476.742261238233	494.160253543814	623.557695139024	617.633077406286	460.604108927713	563.841788628152	-0.291010012490718	0.0144844722312822	0.32462944815837	Zfp950	19	61042278	61129278	-	10615	protein_coding	zinc finger protein 950 [Source:MGI Symbol;Acc:MGI:2652824]	zf-C2H2	455	406	439	509	287	446	553	642	551	589	700	710	1.72783601779224	1.69140807957961	1.51270465087075	1.98544617524099	1.41335588411214	1.91073409973892	2.01891536032628	2.28099923499296	1.77241845154275	1.81566724846983	2.28510223710372
ENSMUSG00000027938	41.4194186671443	23.1272302620024	25.7682474289004	37.8884093732574	12.2512552996731	23.0925595195713	37.1387988368097	48.925282228958	44.9920101350056	29.3643614160161	68.5913464652927	49.584627341068	27.2578534250915	46.4327377371917	-0.757549767839983	0.0144952598088448	0.32462944815837	Creb3l4	3	90144807	90150819	-	1679	protein_coding	cAMP responsive element binding protein 3-like 4 [Source:MGI Symbol;Acc:MGI:1916603]	TF_bZIP	40	21	28	36	9	20	37	51	52	35	77	57	0.960329831538376	0.553109304534849	0.60998191017243	0.887793863414575	0.280208591036752	0.541707306792391	0.854012067314835	1.14559099194184	1.05751688346443	0.682116117795633	1.58915999234911
ENSMUSG00000033233	63.164613467395	87.0024376522947	55.2176730619295	77.8817303783623	95.2875412196795	86.5970981983925	124.465163669308	107.443757051829	98.6363299113584	80.5422484553585	105.114011466293	115.697463795825	77.5251823296756	105.316495724995	-0.448162655783875	0.0145006538717339	0.32462944815837	Trim45	3	100829518	100844236	+	6000	protein_coding	tripartite motif-containing 45 [Source:MGI Symbol;Acc:MGI:1918187]	-	61	79	60	74	70	75	124	112	114	96	118	133	0.409816754234704	0.582261676688943	0.365771295421253	0.510670538675034	0.60986880934351	0.568454105065266	0.800909443093151	0.704006845923788	0.648766271142286	0.523553353956054	0.681488216459288
ENSMUSG00000000154	108.725974001254	101.319294481153	172.095081043013	131.556976990477	121.151302407878	157.029404733085	117.438904429912	146.775846686874	190.350812109639	219.813219742749	231.607143908781	203.557943821227	131.979672276143	184.923978449864	-0.486500999286208	0.0147082331096925	0.328384223507321	Slc22a18	7	143027473	143053071	+	1699	protein_coding	solute carrier family 22 (organic cation transporter), member 18 [Source:MGI Symbol;Acc:MGI:1336884]	-	105	92	187	125	89	136	117	153	220	262	260	234	2.49119110728455	2.39462115117826	4.02585239810326	3.04633014655899	2.73833300419939	3.64024759453213	2.66873506736122	3.39631655468572	4.42144232369824	5.04601893527392	5.30282827224633
ENSMUSG00000053985	158.429276401827	199.334698924878	145.406539063081	192.599414314058	152.460065951487	143.173869021342	218.817787741203	167.880870393483	222.364357782624	193.804785345706	245.859891226244	211.387095506658	165.233977279446	210.019131332653	-0.345846219478575	0.0147667057318248	0.328964899238015	Zfp14	7	29735784	29750805	-	3475	protein_coding	zinc finger protein 14 [Source:MGI Symbol;Acc:MGI:99160]	zf-C2H2	153	181	158	183	112	124	218	175	257	231	276	243	1.77479316139855	2.3033828645267	1.66307524249088	2.18050263062488	1.68481743012883	1.62275243805682	2.43116628351321	1.89929904475842	2.5252999876345	2.17519468999727	2.75221189234625
ENSMUSG00000028081	9491.25978757611	7967.8814735994	7205.90633458179	8071.28365231974	7215.98937150745	7868.78965629393	8058.11559626779	9564.4130161316	9031.28080363824	9977.17102740753	9904.76858892973	9172.28615235476	7970.18504597974	9284.67253078828	-0.220218868395137	0.0148598977850467	0.328964899238015	Rps3a1	3	86045247	86050009	-	977	protein_coding	ribosomal protein S3A1 [Source:MGI Symbol;Acc:MGI:1202063]	-	9166	7235	7830	7669	5301	6815	8028	9970	10438	11892	11119	10544	378.17813339416	327.481173121892	293.141171253676	325.015825701859	283.63046278666	317.217173062009	318.438654000981	384.867026640965	364.802151494003	398.291740356026	394.365359825694
ENSMUSG00000118100	10.3548546667861	8.81037343314377	19.3261855716753	13.6819256070096	24.5025105993462	18.4740476156571	36.1350475168959	23.023662225392	32.0135456729848	20.1355621138396	30.2870880496098	23.4874550562954	15.8583162489363	27.5137267725029	-0.803590135288285	0.0148810503904839	0.328964899238015	Gm50340	19	9876988	9880035	+	2201	lncRNA	predicted gene, 50340 [Source:MGI Symbol;Acc:MGI:6303216]	-	10	8	21	13	18	16	36	24	37	24	34	27	0.183143319758398	0.160735686776835	0.348986697130682	0.244558996627164	0.427505883099234	0.33058666718925	0.633863052381324	0.411245642455643	0.574005883265133	0.356806011328524	0.535286719278967
ENSMUSG00000037139	111.83243040129	143.168568288586	211.667746737396	144.186446781563	215.077593038705	133.936845213514	207.776523222151	201.45704447218	190.350812109639	171.152277967637	603.960167577512	214.866718477961	159.978271743509	264.927257304513	-0.728322916243045	0.0149518471944002	0.328964899238015	Myom3	4	135487026	135542875	+	6038	protein_coding	myomesin family, member 3 [Source:MGI Symbol;Acc:MGI:2685280]	-	108	130	230	137	158	116	207	210	220	204	678	247	0.721010802469845	0.952122020069886	1.39329907166095	0.939480548398158	1.36789767486312	0.873675736171856	1.32858766564673	1.31170536877155	1.24412562238544	1.10554906640273	3.89102641540916
ENSMUSG00000021208	5.17742733339304	3.30389003742891	4.60147275516079	12.6294697910858	5.44500235541026	0	11.0412645190515	3.83727703756533	7.78707867721251	24.3304708875562	22.2699176835366	21.7476435706439	5.19287704541313	15.1689420625943	-1.54365637579486	0.0150284198016408	1	Ifi27l2b	12	103417157	103423482	-	1093	protein_coding	interferon, alpha-inducible protein 27 like 2B [Source:MGI Symbol;Acc:MGI:1916390]	-	5	3	5	12	4	0	11	4	9	29	25	25	0.184400021403583	0.121378972985755	0.1673244718304	0.45459161228212	0.19130638379616	0	0.390018764897943	0.138022515865335	0.281162249736629	0.868198036638013	0.792587905073062
ENSMUSG00000053175	173.961558402006	165.194501871446	103.993284266634	164.183107284115	151.098815362635	181.276592228635	242.907819419134	217.765471881833	169.585268970406	182.0590407793	252.986264884976	180.070488764931	156.617976569245	207.562392450096	-0.407145733032193	0.015044694035813	0.328964899238015	Bcl3	7	19542387	19556695	-	2475	protein_coding	B cell leukemia/lymphoma 3 [Source:MGI Symbol;Acc:MGI:88140]	-	168	150	113	156	111	157	242	227	196	217	284	207	2.73618339638074	2.68014580754404	1.66998611646875	2.60981503794612	2.34443074760622	2.88476103418979	3.78924897807512	3.45908125594588	2.70405505888119	2.86896661132484	3.9762229784168
ENSMUSG00000027466	1798.63825562074	1799.51877371961	1813.90056008438	1790.22734288641	1674.33822428865	1837.0131097819	1918.16877235522	1970.4417587898	1951.0958241238	2042.08159104523	1868.89149200239	2059.06689326856	1785.60604439695	1968.29105526417	-0.140181575165054	0.0150794666743283	0.328964899238015	Rbck1	2	152158254	152174573	-	4601	protein_coding	RanBP-type and C3HC4-type zinc finger containing 1 [Source:MGI Symbol;Acc:MGI:1344372]	-	1737	1634	1971	1701	1230	1591	1911	2054	2255	2434	2098	2367	15.2180396016336	15.7051534703749	15.6690985280437	15.3077871371012	13.974700571165	15.7254593550765	16.0961286019625	16.836752043742	16.7351255611006	17.3104877136633	15.8008643456093
ENSMUSG00000030921	501.174965872446	662.980600844069	487.756112047044	436.769163608383	677.902793248577	594.633407628962	716.678442418435	755.943576400371	687.858616487105	656.922713964018	617.322118187634	706.363463174513	560.20284054158	690.181488438679	-0.302685480378787	0.0150935005194654	0.328964899238015	Trim30a	7	104058232	104114400	-	4111	protein_coding	tripartite motif-containing 30A [Source:MGI Symbol;Acc:MGI:98178]	-	484	602	530	415	498	515	714	788	795	783	693	812	4.74579538422537	6.47576947368888	4.71561144668607	4.17985247654886	6.33244605872192	5.69698592281415	6.7307539453768	7.2291768763415	6.60319791007589	6.23239899275709	5.84135165273351
ENSMUSG00000027901	205.026122402364	143.168568288586	148.167422716177	223.120632975849	147.015063596077	198.596011868314	188.70524814379	236.951857069659	167.854807042136	259.245362215685	338.502748789756	286.198989389673	177.515636974561	246.243168775117	-0.471909288364788	0.0150936131470498	0.328964899238015	Dennd2d	3	106389721	106410346	+	6868	protein_coding	DENN/MADD domain containing 2D [Source:MGI Symbol;Acc:MGI:2181193]	-	198	130	161	212	108	172	188	247	194	309	380	329	1.16210676272671	0.837057768954859	0.857442902778419	1.27810315996364	0.822021358795645	1.138894654295	1.06081717433008	1.3563656315769	0.964508602838515	1.47220794238152	1.91725952529438
ENSMUSG00000090861	0	0	0	0	1.36125058885256	1.15462797597857	10.0375131991378	3.83727703756533	0.865230964134723	0.838981754743317	3.56318682936585	1.73981148565151	0.419313094138522	3.48033354509975	-3.13437566036867	0.0151001567631599	1	Arf4os	14	26349562	26359338	-	566	lncRNA	ADP-ribosylation factor 4, opposite strand [Source:MGI Symbol;Acc:MGI:3642411]	-	0	0	0	0	1	1	10	4	1	1	4	2	0	0	0	0	0.0923577197390474	0.0803468699738892	0.684694041171621	0.266534646361858	0.0603279032120408	0.0578128703573381	0.244890058019748
ENSMUSG00000109555	28.993593067001	26.4311202994313	40.4929602454149	35.7834977414097	25.8637611881987	33.4842113033784	53.1988199554301	74.826902232524	49.3181649556792	30.2033431707594	48.103022196439	42.625381398462	31.841523974139	49.712605651549	-0.632447213066533	0.0152513908018087	0.331381903973894	Gm44891	7	131913585	131915807	-	2223	TEC	predicted gene 44891 [Source:MGI Symbol;Acc:MGI:5753467]	-	28	24	44	34	19	29	53	78	57	36	54	49	0.507726338734617	0.477434880696105	0.723973774113142	0.633285856036443	0.446790336515392	0.593258445232306	0.923951949935505	1.32332113895449	0.875528031231156	0.529912301574954	0.841747608335084
ENSMUSG00000044405	1175.27600468022	1667.36317222246	1325.22415348631	1661.8277333437	1388.47560062962	1543.73760388334	1611.02086846161	1787.21178024605	1647.39975571251	2275.31851886388	1809.20811261051	1618.0246816559	1460.31737804094	1791.36395292508	-0.295014808001312	0.0152648458527757	0.331381903973894	Adig	2	158344532	158350118	+	810	protein_coding	adipogenin [Source:MGI Symbol;Acc:MGI:2675492]	-	1135	1514	1440	1579	1020	1337	1605	1863	1904	2712	2031	1860	56.4835477906969	82.657681997849	65.0260080748895	80.7155936504383	65.8271095799344	75.0640136762726	76.7897046693254	86.7437006584667	80.2632215890132	109.558387031545	86.886539085299
ENSMUSG00000061787	3125.09513843604	2954.77899014059	2613.63652493133	2977.39750324847	2804.17621303628	2881.9514280425	2636.85471741349	3571.54560271393	3556.09926259371	3840.85847321491	3739.56457741946	3209.08228528421	2892.8392996392	3425.66748643995	-0.244054218705686	0.0153221012502946	0.332187187238295	Rps17	7	80992480	80995002	-	1274	protein_coding	ribosomal protein S17 [Source:MGI Symbol;Acc:MGI:1309526]	-	3018	2683	2840	2829	2060	2496	2627	3723	4110	4578	4198	3689	95.490668163806	93.1308593619081	81.5377142069356	91.9440973680473	84.5254371326057	89.0964801408417	79.9104588167459	110.213226930405	110.155720664083	117.583754631614	114.182776761944
ENSMUSG00000090500	0	0	2.76088365309647	2.10491163184763	0	1.15462797597857	0	12.4711503720873	7.78707867721251	3.35592701897327	15.1435440248049	1.73981148565151	1.00340387682045	6.74958526312158	-2.69438912612004	0.0154009356440293	1	Gm17057	15	99716901	99732451	+	591	lncRNA	predicted gene 17057 [Source:MGI Symbol;Acc:MGI:4937884]	-	0	0	3	2	0	1	0	13	9	4	17	2	0	0	0.185670708335662	0.140120877671844	0	0.0769481022084962	0	0.8295947241669	0.519983653066219	0.221469269862967	0.996756403665826
ENSMUSG00000073902	12.4258256001433	29.7350103368602	24.8479528778683	28.416307029943	23.1412600104936	33.4842113033784	38.1425501567235	31.657535559914	51.9138578480834	39.4321424729359	32.9594781716341	46.105004369765	25.3417611931145	40.035094763176	-0.663785432700652	0.0156437282192854	0.338269960458223	Gvin3	7	106195950	106203242	-	7293	unprocessed_pseudogene	GTPase, very large interferon inducible, family member 3 [Source:MGI Symbol;Acc:MGI:3584360]	-	12	27	27	27	17	29	38	33	60	47	37	53	0.0663263589943617	0.163719314035496	0.135415123767638	0.153291433224298	0.121851909958743	0.180832788118938	0.201925125977228	0.170654536019018	0.280918084887002	0.210878647641013	0.175801713802604
ENSMUSG00000051111	11.3903401334647	11.0129667914297	8.28265095928942	31.5736744777145	13.6125058885256	39.2573511832713	27.1012856376719	216.806152622441	28.5526218164459	6.71185403794654	35.6318682936585	25.2272665419469	19.1882482389492	56.6718414916852	-1.56255183537324	0.0157574830987548	0.340283157297749	Sv2c	13	96091102	96269085	-	9700	protein_coding	synaptic vesicle glycoprotein 2c [Source:MGI Symbol;Acc:MGI:1922459]	-	11	10	9	30	10	34	27	226	33	8	40	29	0.0457121949966038	0.0455901090973987	0.0339375428741369	0.12805892583102	0.0538912055384544	0.159401563482219	0.10787107564108	0.878712521237717	0.116165420226237	0.0269872862863945	0.142894611174409
ENSMUSG00000120493	6.21291280007164	8.81037343314377	1.84058910206432	4.20982326369526	1.36125058885256	10.3916517838071	12.0450158389653	5.755915556348	19.9003121750986	10.9067628116631	13.361950610122	19.1379263421666	5.47110016193911	13.5179805557273	-1.30806343286795	0.0158064496495468	1	ENSMUSG00000120493	9	62247370	62248486	-	1117	lncRNA	novel transcript	-	6	8	2	4	1	9	12	6	23	13	15	22	0.21652557571436	0.316722691670379	0.0654917270226058	0.148274733579337	0.0467989877997321	0.366416253936429	0.416333207487704	0.202585420556148	0.703087416306488	0.380829991127389	0.465334958054534
ENSMUSG00000031360	890.517501343602	971.3436710041	903.729249113579	933.528308724424	839.891613322033	1151.16409205063	1052.93513458955	1052.37322755229	1170.65749447428	1079.76951835465	1104.58791710341	1159.58435518673	948.362405926395	1103.31794121015	-0.218431562980129	0.0158753205802118	0.342379132460929	Ctps2	X	161684234	161815504	+	4720	protein_coding	cytidine 5'-triphosphate synthase 2 [Source:MGI Symbol;Acc:MGI:1933185]	-	860	882	982	887	617	997	1049	1097	1353	1287	1240	1333	7.3445903440229	8.26359363076026	7.60990279880659	7.78111717484119	6.83333635650627	9.60591089406898	8.61284177629219	8.76546054000903	9.78792110677423	8.92231417560172	9.10347660596291
ENSMUSG00000020441	185.351898535471	220.259335828594	224.551870451846	199.966605025525	178.323827139686	221.688571387885	222.832793020858	290.673735595574	207.655431392334	270.152125027348	317.123627813561	239.224079277083	205.023684728168	257.943632021126	-0.329756657982941	0.0162788702234004	0.347631892341351	2310033P09Rik	11	59099147	59101564	+	1285	protein_coding	RIKEN cDNA 2310033P09 gene [Source:MGI Symbol;Acc:MGI:1915112]	-	179	200	244	190	131	192	222	303	240	322	356	275	5.61514567899563	6.88286471976291	6.94538490916621	6.12224644115615	5.32914823951082	6.79490665665563	6.69518876741607	8.89302700034357	6.37738706017402	8.19961964853353	9.60007142621538
ENSMUSG00000031283	486.678169338946	1458.11680318529	1017.84577344157	543.067201016689	1008.68668633975	1902.82690441268	2898.83381191098	1643.31389133735	2117.22016923767	1469.05705255555	944.244509781951	3186.46473597074	1069.53692295582	2043.18902846571	-0.933915986416967	0.0163087608654406	0.347631892341351	Chrdl1	X	142068670	142177258	-	6758	protein_coding	chordin-like 1 [Source:MGI Symbol;Acc:MGI:1933172]	-	470	1324	1106	516	741	1648	2888	1713	2447	1751	1060	3663	2.80343696345768	8.66387471317063	5.98613573151681	3.16149026126774	5.73178185925938	11.0898178768577	16.5612068252658	9.55981054518017	12.3637565262626	8.47830277797657	5.43519677454601
ENSMUSG00000035773	41.4194186671443	67.1790974277212	71.7829749805083	103.140669960534	44.9212694321346	127.009077357642	179.671486264566	118.955588164525	83.9274035210682	162.762460420204	66.8097530506098	151.363599251681	75.9087513042808	127.248381778776	-0.743847163530131	0.0163477928854764	0.347926899606917	Kiss1r	10	79752805	79758107	+	3856	protein_coding	KISS1 receptor [Source:MGI Symbol;Acc:MGI:2148793]	-	40	61	78	98	33	110	179	124	97	194	75	174	0.418151915755429	0.699576440688039	0.739890068538842	1.05232378021238	0.447369680831413	1.29730189952654	1.79899097736674	1.21281558741316	0.858952941428284	1.64628745246814	0.673987484630335
ENSMUSG00000089877	1.03548546667861	1.10129667914297	0	0	0	2.30925595195713	8.0300105593102	9.59319259391334	3.46092385653889	3.35592701897327	0	5.21943445695453	0.741006349629786	4.94324808094837	-2.74516490098096	0.0163826297126217	1	Gm16102	1	44683439	44683858	+	420	processed_pseudogene	predicted gene 16102 [Source:MGI Symbol;Acc:MGI:3802041]	-	1	1	0	0	0	2	8	10	4	4	0	6	0.0959758206638651	0.10529144243923	0	0	0	0.216553944786768	0.738165385339309	0.897967915719117	0.325196125885858	0.311638901164318	0
ENSMUSG00000052253	540.523413606233	551.749636250628	620.278527395674	562.011405703317	612.562764983654	586.551011797112	775.899770293348	631.232072679497	599.605058145363	700.54976521067	647.609206237244	679.396385146915	578.94612662277	672.382042952173	-0.215703051099766	0.0164678626853847	0.348309137470065	Zfp622	15	25984452	25998567	+	7130	protein_coding	zinc finger protein 622 [Source:MGI Symbol;Acc:MGI:1289282]	zf-C2H2	522	501	674	534	450	508	773	658	693	835	727	781	2.95115552908075	3.10735277953195	3.45764169865252	3.10107351107769	3.29923018478757	3.24010867178856	4.20148622027104	3.4805387543918	3.31877925667384	3.83210948942238	3.53323460217678
ENSMUSG00000049482	242.303599202794	233.47489597831	207.986568533268	184.179767786668	193.297583617064	225.152455315821	273.020359016547	235.992537810268	223.229588746759	331.39779312361	264.566622080415	270.54068601881	214.399145072321	266.457931132735	-0.313352305309004	0.0165352777192641	0.348849898822426	Ctu2	8	123202882	123210877	+	5164	protein_coding	cytosolic thiouridylase subunit 2 [Source:MGI Symbol;Acc:MGI:1914215]	-	234	212	226	175	142	195	272	246	258	395	297	311	1.8265886240985	1.81548219109006	1.60078064998457	1.40317600437746	1.4374466790989	1.71725097579747	2.04124742498942	1.79663139140393	1.70595721344847	2.50294799105153	1.99295645493976
ENSMUSG00000114041	0	0	0	0	0	1.15462797597857	1.00375131991378	12.4711503720873	1.73046192826945	0	3.56318682936585	1.73981148565151	0.192437995996428	3.41806032254799	-3.59708371261478	0.0166429236778832	1	Gm9269	12	20325040	20328029	+	567	unprocessed_pseudogene	predicted gene 9269 [Source:MGI Symbol;Acc:MGI:3646451]	-	0	0	0	0	0	1	1	13	2	0	4	2	0	0	0	0	0	0.08020516473584	0.0683486467906768	0.864709844766557	0.120443009587355	0	0.244458153155515
ENSMUSG00000025934	542.59438453959	596.90280009549	756.482120948434	859.856401609757	569.002746140372	891.372797455454	515.92817843568	1023.59364977055	925.797131624154	1568.89588137	923.756185513098	1081.29283833241	702.701875131516	1006.54397750765	-0.518492587329944	0.0168280603298153	0.351427059637981	Gsta3	1	21310813	21335885	+	4344	protein_coding	glutathione S-transferase, alpha 3 [Source:MGI Symbol;Acc:MGI:95856]	-	524	542	822	817	418	772	514	1067	1070	1870	1037	1243	4.86242141153394	5.51762061622154	6.92136291059554	7.78740163688037	5.03009396814497	8.08188893389291	4.58549560851318	9.26370492058852	8.41063184697885	14.0861644207214	8.27211443567143
ENSMUSG00000046879	446.29423613848	416.290144716043	448.183446352661	310.474465697525	554.028989662994	430.676235040006	577.157008950421	549.689935631234	513.947192696026	680.414203096831	476.576238427683	491.496744696552	434.324586267951	548.213553916458	-0.337451231119685	0.0168507487606513	0.351455426999053	Irgm1	11	48752795	48762510	-	5810	protein_coding	immunity-related GTPase family M member 1 [Source:MGI Symbol;Acc:MGI:107567]	-	431	378	487	295	407	373	575	573	594	811	535	565	2.99028279803319	2.87712037894186	3.06593151239502	2.10235580186726	3.66191205413536	2.91956462911317	3.83534725816358	3.7195345713763	3.49096082125662	4.56757497911317	3.19084158644405
ENSMUSG00000032386	679.278466141167	790.731015624653	718.750044356115	767.240289808461	849.420367444	730.879508794433	873.263648324984	876.817803083679	853.117730636837	885.1257512542	832.894921364268	826.410455684467	756.049948694805	857.938385058073	-0.183913115381579	0.0169717107800416	0.352639191075342	Trip4	9	65736212	65816076	-	8394	protein_coding	thyroid hormone receptor interactor 4 [Source:MGI Symbol;Acc:MGI:1928469]	-	656	718	781	729	624	633	870	914	986	1055	935	950	3.15025710141865	3.78266468691616	3.40323304412674	3.59599349626277	3.88602202624681	3.42941575893556	4.01664331372087	4.10664669390344	4.01090718524695	4.1126756345577	3.85984833227992
ENSMUSG00000005836	110.796944934611	66.0778007485783	186.819793859528	99.9833025127624	118.428801230173	135.091473189492	105.393888590946	237.911176329051	123.728027871265	219.813219742749	226.262363664732	188.769546193189	119.533019412524	183.646370398655	-0.618190201638183	0.0169932288887142	0.352641602518065	Gata6	18	11052064	11085635	+	6508	protein_coding	GATA binding protein 6 [Source:MGI Symbol;Acc:MGI:107516]	zf-GATA	107	60	203	95	87	117	105	248	143	262	254	217	0.662746370718208	0.407705032186325	1.14092767317939	0.604416616232764	0.698813588720063	0.817567674156559	0.625251488427004	1.4371901982376	0.750279629713607	1.31733038891063	1.35242679399013
ENSMUSG00000041477	248.516512002866	219.158039149451	300.936318187516	298.897451722364	254.55386011543	332.532857081827	284.061623535598	379.890426718968	288.987142020998	335.592701897327	415.111265621122	401.026547442673	275.765839709909	350.778284539448	-0.346747847297852	0.0171142076723377	0.352839892042046	Dcp1b	6	119152214	119198577	+	6339	protein_coding	decapping mRNA 1B [Source:MGI Symbol;Acc:MGI:2442404]	-	240	199	327	284	187	288	283	396	334	400	466	461	1.52616543980401	1.38827240244058	1.88684672034627	1.85505983530154	1.5420927232403	2.06612755650792	1.73012970700091	2.35605022467903	1.79912101827055	2.06481051410338	2.54737427603157
ENSMUSG00000092593	23.816165733608	6.60778007485783	16.5653019185788	15.7868372388572	14.9737564773782	13.8555357117428	22.0825290381031	31.657535559914	24.2264669957723	34.398251944476	16.0343407321463	34.7962297130302	15.2675628591705	27.199225663907	-0.829356829015121	0.0171627193298308	0.352839892042046	Gm20492	10	127124366	127125702	+	455	lncRNA	predicted gene 20492 [Source:MGI Symbol;Acc:MGI:5141957]	-	23	6	18	15	11	12	22	33	28	41	18	40	2.03764050024821	0.583152604278813	1.44700732254562	1.36502371490208	1.26377838042925	1.19937569420364	1.87380443970748	2.73534842019054	2.10126727495477	2.94858344947778	1.37084610500285
ENSMUSG00000024959	214.345491602472	211.44896239545	203.385095778107	189.442046866287	172.878824784276	232.080223171692	222.832793020858	249.423007441747	277.739139487246	229.042019044926	257.440248421683	240.963890762734	203.930107433047	246.240183029866	-0.270707070613043	0.0171734574211843	0.352839892042046	Bad	19	6919229	6929267	+	2558	protein_coding	BCL2-associated agonist of cell death [Source:MGI Symbol;Acc:MGI:1096330]	-	207	192	221	180	127	201	222	260	321	273	289	277	3.26197726681643	3.31927361935087	3.16010384238065	2.91361590436488	2.59533135663886	3.57339406155179	3.36329850122348	3.83338922582203	4.28488484088461	3.49223186156183	3.91493807178677
ENSMUSG00000046605	137.719567068255	186.119138775162	140.80506630792	118.927507199391	129.318805940994	196.286755916356	185.693994184048	189.945213359484	196.407428858582	216.457292723776	171.032967809561	207.907472535355	151.52947353468	194.574061578468	-0.361698809878012	0.0172126761600635	0.352839892042046	B3gntl1	11	121507023	121563979	-	3518	protein_coding	UDP-GlcNAc:betaGal beta-1,3-N-acetylglucosaminyltransferase-like 1 [Source:MGI Symbol;Acc:MGI:2441705]	-	133	169	153	113	95	170	185	198	227	258	192	239	1.52393670900611	2.12438504387054	1.59076202954667	1.32997336179061	1.41161870107123	2.19754855852405	2.03792817086641	2.12265525500858	2.20325459365816	2.39974355672012	1.89118052765222
ENSMUSG00000110206	181.209956668756	230.171005940881	228.233048655975	156.815916572648	200.103836561327	221.688571387885	294.099136734736	260.934838554443	214.577279105411	247.499617649279	226.262363664732	288.808706618151	203.037055964579	255.363657054459	-0.329908830541361	0.0172284205535781	0.352839892042046	Flt3l	7	44779212	44785856	-	3878	protein_coding	FMS-like tyrosine kinase 3 ligand [Source:MGI Symbol;Acc:MGI:95560]	-	175	209	248	149	147	192	293	272	248	295	254	332	1.81903631222127	2.38331171153059	2.33912535493736	1.59088503956999	1.98152320725328	2.25153559922705	2.92801161422948	2.64527732572852	2.18362741569565	2.48917353366806	2.2696218605693
ENSMUSG00000115100	43.4903896005015	64.9765040694353	76.3844477356691	67.3571722191242	81.6750353311539	68.1230505827355	93.3488727519811	79.6234985294807	80.4664796645293	80.5422484553585	98.8784345149024	117.437275281477	67.0010999231032	91.7161348662881	-0.456410456659504	0.0172597531702306	0.352839892042046	Gm34934	14	47104033	47120214	-	4686	lncRNA	predicted gene, 34934 [Source:MGI Symbol;Acc:MGI:5594093]	-	42	59	83	64	60	59	93	83	93	96	111	135	0.361291821705203	0.55679085438415	0.647866357660351	0.565507050475866	0.669327392731125	0.57257861201623	0.769119183508147	0.668014544216142	0.677665422380581	0.670362809162681	0.820820677824833
ENSMUSG00000030706	498.06850947241	541.837966138342	507.082297618719	487.287042772726	551.306488485289	499.95391359872	593.217030069041	580.388151931757	584.896131755073	552.049994621103	597.724590626122	575.007696007824	514.256036347701	580.547265835153	-0.175998546379902	0.0173831013650866	0.354072831236109	Mrpl48	7	100194958	100257508	-	8152	protein_coding	mitochondrial ribosomal protein L48 [Source:MGI Symbol;Acc:MGI:1289321]	-	481	492	551	463	405	433	591	605	676	658	671	661	2.37843906900319	2.66896757429374	2.47227654289881	2.35167419774163	2.59705104217147	2.41551155538037	2.80954692021779	2.79898978636197	2.83150404997279	2.64120849870495	2.85223919207213
ENSMUSG00000025508	4801.5461089887	4823.67945464621	4336.42792446353	4405.58004545709	4486.68194085805	4799.7884961429	4145.49295124389	5465.24182075243	5884.43578708025	6475.26118310892	5360.81458478093	5413.42343760467	4608.95066175942	5457.44496076185	-0.24391844964752	0.0173845311931791	0.354072831236109	Rplp2	7	141027283	141031498	+	2072	protein_coding	ribosomal protein, large P2 [Source:MGI Symbol;Acc:MGI:1914436]	-	4637	4380	4712	4186	3296	4157	4130	5697	6801	7718	6018	6223	90.2107865712856	93.4817265980733	83.1811942096982	83.6507438260602	83.1547543682932	91.2379812647224	77.2455162529902	103.697092213212	112.077306696776	121.886606715517	100.644495287906
ENSMUSG00000055026	42.4549041338229	17.6207468662875	8.28265095928942	30.5212186617906	10.8900047108205	31.1749553514213	33.1237935571546	47.9659629695667	32.8787766371195	44.4660330013958	47.2122254890976	50.4545330838938	23.4907467805721	42.683554123038	-0.858990426259973	0.0174415756417013	0.354796101047298	Gabrg3	7	56366213	57036936	-	11934	protein_coding	gamma-aminobutyric acid (GABA) A receptor, subunit gamma 3 [Source:MGI Symbol;Acc:MGI:95624]	-	41	16	9	29	8	27	33	50	38	53	53	58	0.138486981048413	0.0592892989099738	0.0275845622489633	0.100617216457924	0.0350423793345405	0.102887620826292	0.107162018610722	0.158013459276868	0.108725703224784	0.145321810371998	0.153892491211589
ENSMUSG00000034320	526.026617072733	353.516234004894	384.683122331442	448.346177583545	378.427663701013	394.88276778467	563.104490471628	492.130780067754	462.898565812077	492.482290034327	508.644919891976	484.537498753946	414.313763746383	500.633090838618	-0.271613673255064	0.0175433933029481	0.355450555660421	Slc26a2	18	61325991	61344684	-	12370	protein_coding	solute carrier family 26 (sulfate transporter), member 2 [Source:MGI Symbol;Acc:MGI:892977]	-	508	321	418	426	278	342	561	513	535	587	571	557	1.6554083344254	1.14756606868691	1.23599354475411	1.42593665674735	1.17480214110749	1.25730835202794	1.75754373578868	1.56407572450154	1.47679000579127	1.55277798490402	1.59953593959519
ENSMUSG00000032609	622.326765473843	781.920642191509	688.380324172054	605.162094156194	763.661580346289	926.011636734811	884.304912844036	789.519750479068	833.217418461738	828.913973686398	966.514427465488	1210.03888827063	731.24384051245	918.751561867892	-0.33008089393223	0.0178043734627617	0.35863406056959	Klhdc8b	9	108324835	108338780	-	8419	protein_coding	kelch domain containing 8B [Source:MGI Symbol;Acc:MGI:1925517]	-	601	710	748	575	561	802	881	823	963	988	1085	1391	2.87756463380126	3.72941063491845	3.24975565952129	2.82792358087862	3.48330886303133	4.33210777776309	4.0553503367866	3.68679878545516	3.90571401222812	3.84005459161258	4.46577484055432
ENSMUSG00000026930	250.587482936223	261.007312956884	255.84188518694	329.418670384154	230.051349516083	340.615252913677	314.174163133012	399.076811906795	284.660987200324	359.08419103014	336.721155375073	401.896453185499	277.920325648994	349.26896030514	-0.32911842440099	0.0178737256390299	0.359239067358375	Gpsm1	2	26205527	26238249	+	5383	protein_coding	G-protein signalling modulator 1 (AGS3-like, C. elegans) [Source:MGI Symbol;Acc:MGI:1915089]	-	242	237	278	313	169	295	313	416	329	428	378	462	1.81218324582487	1.94700170544324	1.88899164271054	2.4075775881823	1.64116390932915	2.49220079501027	2.25337222637715	2.91460067312733	2.08692182216737	2.60171878475282	2.43329640224823
ENSMUSG00000046743	208.1325788024	236.778786015739	266.885419799326	246.274660926173	258.637611881987	218.224687459949	258.967840537754	293.551693373748	262.164982132821	256.728416951455	366.117446717341	347.962297130302	239.155624147596	297.582112807237	-0.315669922143888	0.0178854464383716	0.359239067358375	Fat4	3	38941089	39066134	+	17165	protein_coding	FAT atypical cadherin 4 [Source:MGI Symbol;Acc:MGI:3045256]	-	201	215	290	234	190	189	258	306	303	306	411	400	0.472023232184299	0.553907209569618	0.617964903420702	0.564458976310805	0.578627974409389	0.500729744747266	0.58249054147515	0.672338109689606	0.602744814742707	0.583335735182612	0.8297086314725
ENSMUSG00000030917	378.98768080437	511.001659122339	500.640235761494	483.077219509031	558.112741429552	563.458452277541	564.108241791542	585.184748228713	678.341075881623	581.414356037119	533.587227697537	696.79450000343	499.212998150721	606.571691606661	-0.282544567190367	0.0178998163683453	0.359239067358375	Tmem159	7	119701576	119720215	+	1962	protein_coding	transmembrane protein 159 [Source:MGI Symbol;Acc:MGI:1925752]	-	366	464	544	459	410	488	562	610	784	693	599	801	7.5195734721964	10.4583059646061	10.1416709841571	9.68665911446568	10.9238187781057	11.3111357093517	11.1006981113335	11.7257584101548	13.6443145172904	11.5578005317133	10.5792629881074
ENSMUSG00000049755	288.900445203331	416.290144716043	327.624860167448	365.202168125564	401.568923711507	413.356815400327	492.841898077664	449.920732654535	475.877030274098	416.134950352686	439.162776719341	401.896453185499	368.82389288737	445.972306877304	-0.275658830568163	0.018002382629974	0.359982109944273	Zfp672	11	58205940	58221165	-	6674	protein_coding	zinc finger protein 672 [Source:MGI Symbol;Acc:MGI:2442105]	zf-C2H2	279	378	356	347	295	358	491	469	550	496	493	462	1.68511337509615	2.50465528942946	1.95107253775796	2.15279961269918	2.31060360575798	2.43939550031004	2.851072553279	2.6503104590703	2.81391613274023	2.43184806302632	2.55969553527549
ENSMUSG00000036412	79.7323809342528	145.371161646872	159.210957328563	59.9899815076575	200.103836561327	151.256264853192	296.106639374564	169.799508912266	371.184083613796	208.067475176343	106.004808173634	178.33067727928	132.610763805311	221.58219875498	-0.742499095584318	0.0180446431102646	0.360389799427673	Arsi	18	61044852	61051633	+	2975	protein_coding	arylsulfatase i [Source:MGI Symbol;Acc:MGI:2670959]	-	77	132	173	57	147	131	295	177	429	248	119	205	1.04331362698131	1.96213699792636	2.12700618850006	0.793319664896033	2.58297378074898	2.00248706591058	3.84280215308994	2.24386335645577	4.9238519295894	2.72775697019121	1.38607772839177
ENSMUSG00000027430	231.948744536008	205.942478999736	218.109808594621	187.337135234439	247.747607171167	256.327410667242	286.069126175426	268.609392629573	249.1865176708	281.897869593755	251.204671470293	277.499931961416	224.568864200535	269.07791825021	-0.263107997954547	0.018256762706879	0.362866922944807	Dtd1	2	144441817	144610678	+	2353	protein_coding	D-tyrosyl-tRNA deacylase 1 [Source:MGI Symbol;Acc:MGI:1913294]	-	224	187	237	178	182	222	285	280	288	336	282	319	3.83740127839202	3.51448784070427	3.68413926964883	3.13226436237199	4.0433291227194	4.29058432042462	4.69392247264744	4.48793144447804	4.17931612698187	4.67259686913605	4.15293157040459
ENSMUSG00000032531	3901.70923844499	5427.19003481656	6243.27823420216	3844.6210955697	4984.89965637809	5914.00449296222	7578.322465349	6047.54861120297	6931.36525368327	5372.83915737621	5543.42790978593	6851.37763049565	5052.61712539562	6387.4801713155	-0.338171546146091	0.0183447019650616	0.363234253410129	Amotl2	9	102593871	102610617	+	6289	protein_coding	angiomotin-like 2 [Source:MGI Symbol;Acc:MGI:1929286]	-	3768	4928	6784	3653	3662	5122	7550	6304	8011	6404	6223	7876	24.1512950786781	34.6522524889523	39.4560735909967	24.0507382402552	30.4387194850319	37.0376457451969	46.5241381163728	37.8046063140593	43.4950464731307	33.3204372588505	34.2882878986405
ENSMUSG00000097595	3.10645640003582	15.4181535080016	3.68117820412863	5.26227907961908	4.08375176655769	6.9277678558714	20.0750263982755	10.5525118533047	12.1132334978861	15.940653340123	16.0343407321463	10.4388689139091	6.4132644690357	14.1924391226075	-1.14844844412744	0.01834682333683	1	1500002F19Rik	7	132476468	132532926	-	1239	lncRNA	RIKEN cDNA 1500002F19 gene [Source:MGI Symbol;Acc:MGI:1923933]	-	3	14	4	5	3	6	20	11	14	19	18	12	0.0976025294886764	0.499688201406516	0.118085971080308	0.167093298434341	0.126572565066104	0.220224350630611	0.625563885880771	0.334835493996959	0.385825912067967	0.501791451027292	0.503418061159239
ENSMUSG00000028565	1115.21784761286	1418.47012273615	1477.07275440661	1194.53735107353	1704.28573724341	1375.16191939047	2068.73147034229	1780.49654543032	1634.42129125049	1284.48106651202	1639.06594150829	1919.01206867362	1380.79095541051	1721.0347306195	-0.318023618540507	0.018481755120245	0.363609196221816	Nfia	4	97660971	98007111	+	10891	protein_coding	nuclear factor I/A [Source:MGI Symbol;Acc:MGI:108056]	CTF/NFI	1077	1288	1605	1135	1252	1191	2061	1856	1889	1531	1840	2206	3.98619986402467	5.22986490698062	5.39034917960804	4.31507588509355	6.00933207732262	4.97312525301795	7.33370123103265	6.42717794198298	5.92241535110003	4.59990006029473	5.8543361955763
ENSMUSG00000028601	584.013803206735	649.765040694353	644.20618572251	651.470150056842	643.871528527263	763.209092121833	636.378336825333	731.001275656196	721.602624088359	864.99018914036	924.646982220439	854.247439454891	656.089300054923	788.81114123093	-0.266602381263478	0.0185237836148538	0.363609196221816	Echdc2	4	108022634	108036505	+	2287	protein_coding	enoyl Coenzyme A hydratase domain containing 2 [Source:MGI Symbol;Acc:MGI:1289238]	-	564	590	700	619	473	661	634	762	834	1031	1038	982	9.94086243937751	11.4084912271278	11.1954484825045	11.206882500615	10.8114665557929	13.1437923374951	10.7432596637599	12.5660538586247	12.4518691490269	14.7514076281343	15.7274670099547
ENSMUSG00000120381	7.24839826675025	19.8233402245735	13.8044182654824	9.47210234331434	6.80625294426282	16.1647916636999	29.1087882774995	11.511831112696	16.4393883185597	20.1355621138396	24.0515110982195	45.2350986269393	12.2198839513472	24.4136965912923	-0.993816312084995	0.0186018376024085	0.363609196221816	ENSMUSG00000120381	17	79746334	79759191	-	1039	lncRNA	novel transcript	-	7	18	15	9	5	14	29	12	19	24	27	52	0.271577394371283	0.766124451242137	0.528062505420481	0.358663594002183	0.251561450299811	0.612770546364868	1.08167160652464	0.435587901369042	0.624414120444934	0.755851810331166	0.900483606029303
ENSMUSG00000049536	93.1936920010747	73.7868775025791	87.427982348055	93.6685676172196	77.5912835645962	58.8860267749069	94.3526240718949	104.565799273655	117.671411122322	82.2202119648451	123.820742320463	127.00623845256	80.7590716347386	108.272837867624	-0.419957303712137	0.0186898643447746	0.364873098114753	Tceal1	X	135608731	135612227	+	2803	protein_coding	transcription elongation factor A (SII)-like 1 [Source:MGI Symbol;Acc:MGI:2385317]	-	90	67	95	89	57	51	94	109	136	98	139	146	1.2942868430589	1.05704644674989	1.23968152211984	1.3147017560937	1.06301989091015	0.827432304197747	1.29962403733482	1.46660617843814	1.65672517932574	1.14404719692502	1.71838034468834
ENSMUSG00000041930	78.6968954675742	109.028371235154	103.072989715602	53.6752466121146	46.2825200209872	98.1433779581782	117.438904429912	141.019931130526	128.919413656074	124.169299702011	117.585165369073	82.6410455684467	81.4832335016017	118.628959976007	-0.536710598175632	0.0187189466929364	0.365008384212441	Fam222a	5	114706077	114751281	+	3141	protein_coding	family with sequence similarity 222, member A [Source:MGI Symbol;Acc:MGI:3605543]	-	76	99	112	51	34	85	117	147	149	148	132	95	0.975341673222087	1.39382940994053	1.30424658029864	0.672299168084533	0.565849079483676	1.23065517811009	1.44354692118647	1.76506014379173	1.61976866904943	1.5418237899056	1.45624212151953
ENSMUSG00000034584	15.5322820001791	6.60778007485783	3.68117820412863	16.839293054781	1.36125058885256	12.7009077357642	22.0825290381031	23.9829814847833	5.19138578480834	29.3643614160161	44.5398353670732	16.5282091136893	9.4537819430939	23.6148837007456	-1.31233266976506	0.0187593796628141	0.365221318142503	Exph5	9	53212970	53288814	+	10519	protein_coding	exophilin 5 [Source:MGI Symbol;Acc:MGI:2443248]	-	15	6	4	16	1	11	22	25	6	35	50	19	0.0574814782947381	0.0252243022099877	0.0139089759643028	0.0629804648381478	0.00496952841261534	0.047555814474516	0.0810515277181198	0.0896345956369496	0.0194765243186701	0.108876600606414	0.164711204533674
ENSMUSG00000024854	252.65845386958	426.20181482833	347.871340290156	275.74342377204	372.982661345603	401.810535640541	326.219178971977	456.635967470275	477.607492202367	527.719523733547	407.98489196239	498.455990639158	346.211371624375	449.103840829952	-0.377039549481354	0.0187741977584937	0.365221318142503	Pold4	19	4281953	4283688	+	1164	protein_coding	polymerase (DNA-directed), delta 4 [Source:MGI Symbol;Acc:MGI:1916995]	-	244	387	378	262	274	348	325	476	552	629	458	573	8.4498299842207	14.7028101839111	11.8781400059479	9.3198440465909	12.3051585979471	13.5960157087775	10.8204011059725	15.4228303875057	16.1927555466876	17.6822948688981	13.6345274828916
ENSMUSG00000121096	212.274520669115	244.48786276974	289.89278357513	193.651870129982	245.025105993462	262.100550547135	368.376734408356	272.446669667139	328.787766371195	276.024997310551	258.331045129024	305.33691573184	241.23878228076	301.550688103017	-0.320918964805308	0.0188109326689139	0.365503468825947	ENSMUSG00000121096	11	98657199	98658572	+	1374	lncRNA	novel transcript, sense intronic to Thraand KO:Thra	-	205	222	315	184	180	227	367	284	380	329	290	351	6.01420535601076	7.14510487120366	8.38558646708114	5.54487071380894	6.84818376056343	7.51319253856276	10.3512384003094	7.79545946047862	9.44346828445832	7.83520075743913	7.31372891618657
ENSMUSG00000032577	474.252343738802	452.632935127761	325.784271065384	436.769163608383	513.191471997417	411.04755944837	622.325818346541	654.255734904889	496.642573413331	518.49072443137	627.12088196839	401.896453185499	435.612957497686	553.455364375003	-0.346321751458094	0.0188858071843327	0.365665622768801	Mapkapk3	9	107132126	107167076	-	5542	protein_coding	mitogen-activated protein kinase-activated protein kinase 3 [Source:MGI Symbol;Acc:MGI:2143163]	-	458	411	354	415	377	356	620	682	574	618	704	462	3.33127189875516	3.27957574771922	2.33639549944287	3.10057263282071	3.55602218573753	2.92125097658946	4.33548958729602	4.64117520351108	3.53655187786731	3.64890802897015	4.40183472026257
ENSMUSG00000068587	4.14194186671443	2.20259335828594	3.68117820412863	5.26227907961908	8.16750353311539	2.30925595195713	2.00750263982755	11.511831112696	2.59569289240417	58.7287228320322	7.12637365873171	8.69905742825755	4.29412533230343	15.1115300939915	-1.8323858296543	0.0189987413743592	1	Mgam	6	40605765	40746057	+	12094	protein_coding	maltase-glucoamylase [Source:MGI Symbol;Acc:MGI:1203495]	-	4	2	4	5	6	2	2	12	3	70	8	10	0.0133321794869599	0.00731311490399813	0.012097611887589	0.0171182897932982	0.0259340843586741	0.00752047765920643	0.00640874528366359	0.0374215172418087	0.00847004958277205	0.189395230987079	0.0229217418288701
ENSMUSG00000117725	61.0936425340378	50.6596472405767	68.1017967763797	51.5703349802669	62.617527087218	69.277678558714	75.2813489935331	88.2573718640027	70.0837080949126	77.1863214363852	89.9704674414878	78.2915168543179	60.5534378628655	79.8451224474399	-0.398350415789682	0.0189992099318552	0.366998806620373	Gm50240	17	30795274	30801568	+	6295	lncRNA	predicted gene, 50240 [Source:MGI Symbol;Acc:MGI:6303048]	-	59	46	74	49	46	60	75	92	81	92	101	90	0.377804739642665	0.323150225246375	0.429977376666763	0.322300277720327	0.381989768248743	0.4334518990172	0.461719810130823	0.551191108234896	0.439363471113458	0.478225859451519	0.555972400983197
ENSMUSG00000025221	5.17742733339304	1.10129667914297	7.36235640825726	6.31473489554289	2.72250117770513	2.30925595195713	8.0300105593102	13.4304696314787	6.92184771307779	4.19490877371659	16.0343407321463	18.2680205993409	4.1645954076664	11.1465996681784	-1.39191500693997	0.0190170006362666	1	Kcnip2	19	45780278	45804500	-	3675	protein_coding	Kv channel-interacting protein 2 [Source:MGI Symbol;Acc:MGI:2135916]	-	5	1	8	6	2	2	8	14	8	5	18	21	0.0548433260936372	0.0120333077073406	0.0796236833570075	0.0676011744522935	0.0284486908148576	0.0247490222613449	0.0843617583244925	0.143674866515059	0.0743305430596247	0.044519843023474	0.169723803476543
ENSMUSG00000035085	242.303599202794	269.817686390028	361.675758555638	222.068177159925	225.967597749526	278.265342210835	366.369231768528	345.35493338088	400.601936394377	277.702960820038	311.778847569512	331.434088016613	266.683026878124	338.873666324991	-0.342751305205722	0.019102783728555	0.367067462422253	1700020L24Rik	11	83328503	83332059	+	1050	protein_coding	RIKEN cDNA 1700020L24 gene [Source:MGI Symbol;Acc:MGI:1913580]	-	234	245	393	211	166	241	365	360	463	331	350	381	8.98333681413777	10.3185613590446	13.6902970571955	8.32057788883646	8.26434468171613	10.4379001387222	13.4715182824424	12.9307379863553	15.0565806285152	10.3152476285389	11.5506477365981
ENSMUSG00000086844	11.3903401334647	26.4311202994313	15.6450073675467	32.6261302936383	19.0575082439359	16.1647916636999	20.0750263982755	44.1286859320013	27.6873908523111	24.3304708875562	58.7925826845366	41.7554756556362	20.2191496669528	36.1282720683862	-0.838991535207262	0.019359690014167	0.368311922012436	B230206H07Rik	7	140939054	140945104	-	4747	lncRNA	RIKEN cDNA B230206H07 gene [Source:MGI Symbol;Acc:MGI:2444929]	-	11	24	17	31	14	14	20	46	32	29	66	48	0.0934081085879622	0.223580733049808	0.130990352267986	0.270397577398973	0.154169490459703	0.134120201742806	0.163276522984258	0.365467455902535	0.23017884621371	0.199903192341552	0.48178391654654
ENSMUSG00000029490	292.006901603367	399.770694528899	341.42927843293	263.113953980954	253.192609526577	488.407633838934	417.56054908413	478.700310436275	472.416106417559	419.490877371659	500.627749525902	376.669186643552	339.653511985277	444.24412991318	-0.386853220115172	0.0194063715696143	0.368311922012436	Mfsd7a	5	108588920	108596966	-	5340	protein_coding	major facilitator superfamily domain containing 7A [Source:MGI Symbol;Acc:MGI:2442629]	-	282	363	371	250	186	423	416	499	546	500	562	433	2.12872213472438	3.00612983413578	2.5412200487132	1.9384700071175	1.82079612420374	3.60233837367202	3.01901348610684	3.52427183101896	3.49129099195435	3.06386560133459	3.64688990335288
ENSMUSG00000078853	314.787581870297	371.136980871181	396.64695149486	241.012381846554	431.516436666263	279.419970186813	464.736861120078	415.385239316447	403.197629286781	771.863214363852	368.789836839366	394.067301500067	339.086717155995	469.673347071099	-0.470899280752957	0.019436617063796	0.368311922012436	Igtp	11	58090382	58098417	+	2022	protein_coding	interferon gamma induced GTPase [Source:MGI Symbol;Acc:MGI:107729]	-	304	337	431	229	317	242	463	433	466	920	414	453	6.06043164310697	7.37040097074612	7.79660872040357	4.68937177626846	8.19535449605309	5.44276531852797	8.87386503666432	8.07638205502862	7.86936025697083	14.8883866728354	7.09490825363741
ENSMUSG00000026415	2.07097093335722	4.40518671657188	0.920294551032158	5.26227907961908	6.80625294426282	5.77313987989284	23.0862803580168	4.79659629695667	4.32615482067362	6.71185403794654	16.9251374394878	13.0485861423863	4.206354017456	11.4824348492446	-1.47396481600321	0.019479782063257	1	Fcamr	1	130728639	130742477	+	1911	protein_coding	Fc receptor, IgA, IgM, high affinity [Source:MGI Symbol;Acc:MGI:1927803]	-	2	4	1	5	5	5	23	5	5	8	19	15	0.0421871739181825	0.0925639054410815	0.0191403084992807	0.108335215468419	0.136772551994508	0.118985683948774	0.466423183044069	0.0986777929361667	0.0893395950235873	0.13698413237992	0.344524814749394
ENSMUSG00000109599	11.3903401334647	7.7090767540008	7.36235640825726	11.577013975162	13.6125058885256	4.61851190391427	14.0525184787929	9.59319259391334	21.6307741033681	20.1355621138396	16.0343407321463	26.0971722847727	9.37830084388744	17.9239267178055	-0.948605241639263	0.0195186104331284	0.368311922012436	Gm31812	1	52147280	52152910	-	1170	lncRNA	predicted gene, 31812 [Source:MGI Symbol;Acc:MGI:5590971]	-	11	7	8	11	10	4	14	10	25	24	18	30	0.378981445698339	0.264578496385758	0.250100031057267	0.389284540916519	0.446790336515392	0.155474627026397	0.463719280533669	0.322347456924811	0.72960669269263	0.671222248661608	0.53310681861222
ENSMUSG00000103473	0	0	1.84058910206432	1.05245581592382	2.72250117770513	4.61851190391427	6.02250791948265	2.877957778174	6.05661674894306	13.4237080758931	2.67239012202439	7.8291516854318	1.70567633326792	6.48038872165816	-1.96469315062101	0.0195445134897865	1	Gm37696	3	61265970	61269318	-	3349	lncRNA	predicted gene, 37696 [Source:MGI Symbol;Acc:MGI:5610924]	-	0	0	2	1	2	4	6	3	7	16	3	9	0	0	0.021843612745372	0.012363606853398	0.0312179572244257	0.0543163074412914	0.0694303064741363	0.0337844005316837	0.0713703053228144	0.156331249315036	0.0310408568615655
ENSMUSG00000040296	900.872356010388	795.136202341225	792.373608438688	863.013769057529	814.027852133834	767.827604025747	960.590013157483	957.400620872551	979.441451400507	857.43935334767	869.417586365268	968.205091765065	822.208565334568	932.082352818091	-0.180460660635163	0.0195719755700172	0.368311922012436	Ddx58	4	40203773	40239828	-	7050	protein_coding	DEAD/H box helicase 58 [Source:MGI Symbol;Acc:MGI:2442858]	-	870	722	861	820	598	665	957	998	1132	1022	976	1113	4.97440636462075	4.52887617096059	4.4670792249319	4.81598437853396	4.43406137370722	4.28961111907406	5.26060629402982	5.33889690145851	5.4826683011054	4.74354191261602	4.79720518762542
ENSMUSG00000024792	442.152294271765	441.619968336331	393.886067841763	415.720047289907	381.150164878718	399.501279688584	516.931929755594	414.425920057056	524.329964265642	454.728111070878	494.392172574512	475.838441325688	412.338303717845	480.107756508228	-0.218767655664101	0.0195753345906657	0.368311922012436	Zfpl1	19	6130792	6134986	-	1810	protein_coding	zinc finger like protein 1 [Source:MGI Symbol;Acc:MGI:1891017]	-	427	401	428	395	280	346	515	432	606	542	555	547	9.50956004301523	9.79733963293655	8.64917759338654	9.03605477571921	8.0866582454388	8.69326498795942	11.0266003348683	9.00150821149595	11.432170989015	9.79854688688471	10.6253196030032
ENSMUSG00000030107	151.180878135077	122.24393138487	114.116524327988	106.298037408305	176.962576550833	94.6794940302425	179.671486264566	214.887514103659	217.172971997816	107.389664607145	159.452610614122	186.159828964712	127.580240306219	177.455679425336	-0.478381066625764	0.0195928492107264	0.368311922012436	Usp18	6	121222865	121247876	+	2790	protein_coding	ubiquitin specific peptidase 18 [Source:MGI Symbol;Acc:MGI:1344364]	-	146	111	124	101	130	82	179	224	251	128	179	214	2.10940405846172	1.75938603817811	1.62565020187224	1.49891672206273	2.43572796358391	1.33658026137209	2.4863473866402	3.02798643408081	3.07187953323361	1.50122825507112	2.22318918801189
ENSMUSG00000026482	1388.58601081601	1465.82587993929	1905.00972063657	1231.37330463086	1384.39184886306	1863.56955322941	2110.88902577867	1997.30269805276	1848.13333939177	2023.62399244088	1453.78022638127	2059.06689326856	1539.79271968587	1915.46602921898	-0.31465980721575	0.0196170157066044	0.368311922012436	Rgl1	1	152392511	152642102	-	6907	protein_coding	ral guanine nucleotide dissociation stimulator,-like 1 [Source:MGI Symbol;Acc:MGI:107484]	-	1341	1331	2070	1170	1017	1614	2103	2082	2136	2412	1632	2367	7.82619106910411	8.5217926961602	10.962017974837	7.01385429880916	7.69699368056029	10.6267256473182	11.7994780341465	11.3684532245754	10.5595753747908	11.4269101069748	8.18763157932305
ENSMUSG00000028145	118.045343201361	138.763381572014	142.645655409984	87.3538327216767	134.763808296404	98.1433779581782	158.592708546376	176.514743728005	175.641885719349	141.787916551621	157.671017199439	127.00623845256	119.952566526603	156.202418366225	-0.380261089215475	0.0196258135023343	0.368311922012436	Them4	3	94217396	94239847	+	4025	protein_coding	thioesterase superfamily member 4 [Source:MGI Symbol;Acc:MGI:1923028]	-	114	126	155	83	99	85	158	184	203	169	177	146	1.1416949797232	1.38435357363579	1.40856026808185	0.853832225147446	1.2857571348715	0.960369668184797	1.52126257674275	1.7240983981807	1.72212557099554	1.37392106861138	1.52382458338723
ENSMUSG00000042962	16.5677674668577	19.8233402245735	27.6088365309647	19.9966605025525	36.7537658990192	18.4740476156571	39.1463014766372	30.6982163005227	32.0135456729848	36.915197208706	32.9594781716341	41.7554756556362	23.2040697066041	35.5813690810202	-0.627429598595382	0.019647069831637	0.368311922012436	Gm5436	12	84305105	84305747	-	643	processed_pseudogene	predicted pseudogene 5436 [Source:MGI Symbol;Acc:MGI:3643291]	-	16	18	30	19	27	16	39	32	37	44	37	48	1.00304434659592	1.23795226258255	1.70655347785966	1.22349715037102	2.19503992698619	1.13160381723723	2.35053441132541	1.8769344925762	1.96483195811284	2.23914731474207	1.99396873835519
ENSMUSG00000043673	654.42681494088	795.136202341225	850.352165153714	814.600801525033	641.149027349558	795.538675449233	823.076082329296	863.3873334522	1059.90793106504	911.973167405986	856.946432462488	879.474705996838	758.533947793274	899.127608785307	-0.244548986959032	0.019718204002499	0.368363772504735	Kcns3	12	11140203	11201057	-	3164	protein_coding	potassium voltage-gated channel, delayed-rectifier, subfamily S, member 3 [Source:MGI Symbol;Acc:MGI:1098804]	-	632	722	924	774	471	689	820	900	1225	1087	962	1011	8.05177681321629	10.0912063859899	10.6818165919481	10.1289591588088	7.78169250137601	9.90303105916481	10.0436219465415	10.7279352762903	13.2200858698067	11.2417528395668	10.5357678153673
ENSMUSG00000066116	23.816165733608	48.4570538822907	43.2538438985114	35.7834977414097	38.1150164878718	32.3295833273999	40.150052796551	41.2507281538273	71.814170023182	52.855850548829	73.9361267093415	53.0642503123711	36.9591935118486	55.5118630906837	-0.58911281901454	0.0197923331507924	0.369329867865919	Gm10154	4	83423422	83423775	-	354	processed_pseudogene	predicted gene 10154 [Source:MGI Symbol;Acc:MGI:3642271]	-	23	44	47	34	28	28	40	43	83	63	83	61	2.61900120794615	5.49657021547168	4.85628556067766	3.97682050273732	4.13470379215939	3.59699772696665	4.3789472011654	4.58115834968567	8.00588767541031	5.82342183955357	8.12460815370883
ENSMUSG00000049676	65.2355844007523	59.4700206737204	69.942385878444	88.4062885376005	76.2300329757436	99.2980059341568	80.300105593102	73.8675829731327	89.1187893058765	115.779482154578	153.217033662732	158.322845194287	76.4303864000696	111.767639813951	-0.551185833958085	0.0198650599470526	0.369776837766684	Catsperg1	7	28880746	28913460	-	7044	protein_coding	cation channel sperm associated auxiliary subunit gamma 1 [Source:MGI Symbol;Acc:MGI:2443617]	-	63	54	76	84	56	86	80	77	103	138	172	182	0.360522460926444	0.339013332555614	0.394642510675969	0.493764966719265	0.415583515736633	0.555219228115989	0.440132682911002	0.412269767097619	0.499289622580289	0.641062986636991	0.84612922090923
ENSMUSG00000052921	999.243475344856	1084.77722895583	1132.88259232059	948.262690147358	946.069159252533	880.981145671647	1539.75452474773	1347.84355944482	1109.22609602072	977.413744275965	1204.35714832566	1111.73953933131	998.702715282134	1215.05576869103	-0.281933830163898	0.0199187043190027	0.370011827580843	Arhgef15	11	68833981	68848306	-	6483	protein_coding	Rho guanine nucleotide exchange factor (GEF) 15 [Source:MGI Symbol;Acc:MGI:3045246]	-	965	985	1231	901	695	763	1534	1405	1282	1165	1352	1278	6.00015426732447	6.71896802978707	6.94531026783222	5.7545199963256	5.60400373496052	5.35221943131017	9.16985181371299	8.17354414724435	6.75222127186416	5.88018333872053	7.226504275743
ENSMUSG00000113326	0	0	0	0	0	0	5.01875659956888	0	2.59569289240417	3.35592701897327	0.890796707341463	3.47962297130302	0	2.5567993649318	-3.66387591430738	0.0199431756691854	1	Gm47586	13	63392035	63394062	+	2028	TEC	predicted gene, 47586 [Source:MGI Symbol;Acc:MGI:6096627]	-	0	0	0	0	0	0	5	0	3	4	1	4	0	0	0	0	0	0	0.0955465550550142	0	0.0505112325710282	0.0645406008328469	0.0170867570068019
ENSMUSG00000111340	1.03548546667861	0	0	3.15736744777145	0	1.15462797597857	8.0300105593102	5.755915556348	5.19138578480834	9.22879930217649	3.56318682936585	0	0.891246815071437	5.29488300533481	-2.55091902931729	0.0201607400872751	1	Gm47171	9	123473259	123476052	-	2794	TEC	predicted gene, 47171 [Source:MGI Symbol;Acc:MGI:6095951]	-	1	0	0	3	0	1	8	6	6	11	4	0	0.0144272887182618	0	0	0.0444585390322439	0	0.0162764239102438	0.110962584768257	0.0809906638372289	0.0733262560157804	0.128827104812021	0.0496090811879661
ENSMUSG00000106369	0	0	0	0	0	0	17.0637724385342	0	3.46092385653889	1.67796350948663	0	0.869905742825755	0	3.84542759123091	-4.24733926082785	0.0201632939977754	1	Gm43355	3	127273084	127275076	-	346	transcribed_unprocessed_pseudogene	predicted gene 43355 [Source:MGI Symbol;Acc:MGI:5663492]	-	0	0	0	0	0	0	17	0	4	2	0	1	0	0	0	0	0	0	1.90408267750096	0	0.394746742404799	0.189144997816494	0
ENSMUSG00000022229	0	0	0	0	0	0	3.01125395974133	0.959319259391334	0	0	16.0343407321463	2.60971722847726	0	3.76910519662604	-4.22409031676193	0.0202384196263641	1	Atp12a	14	56602525	56626007	+	4016	protein_coding	ATPase, H+/K+ transporting, nongastric, alpha polypeptide [Source:MGI Symbol;Acc:MGI:1926943]	-	0	0	0	0	0	0	3	1	0	0	18	3	0	0	0	0	0	0	0.0289494641909714	0.00939109872017005	0	0	0.155312494466209
ENSMUSG00000020514	160.500247335184	148.675051684301	157.370368226499	162.078195652268	190.575082439359	153.565520805149	219.821539061117	233.114580032094	199.868352715121	174.50820498661	180.831731590317	182.680205993409	162.127411023793	198.470769063111	-0.292895875577237	0.0202480533700516	0.373272423379487	Mrpl22	11	58062487	58070391	+	981	protein_coding	mitochondrial ribosomal protein L22 [Source:MGI Symbol;Acc:MGI:1333794]	-	155	135	171	154	140	133	219	243	231	208	203	210	6.36903764038493	6.08565217768028	6.37582992018699	6.4999804079639	7.46016892163314	6.16549610386792	8.65143375936668	9.34216161858238	8.04039962626043	6.93801590359705	7.17058559794928
ENSMUSG00000028789	339.639233070583	372.238277550324	463.828453720207	388.356196075888	310.365134258385	438.758630871856	367.372983088442	472.944394879927	481.068416058906	626.719370793258	460.541897695537	509.764765295892	385.530987591207	486.401971301994	-0.334584513526667	0.0202496242631031	0.373272423379487	Azin2	4	128824026	128856235	-	4024	protein_coding	antizyme inhibitor 2 [Source:MGI Symbol;Acc:MGI:2442093]	-	328	338	504	369	228	380	366	493	556	747	517	586	3.28569310503331	3.71450625464044	4.58123093668766	3.79689623282778	2.96187351314229	4.29448429273958	3.52481309127605	4.62060727208748	4.71792987803588	6.07440288589048	4.45205135175538
ENSMUSG00000046721	744.514050541919	632.144293828065	597.27116361987	714.617499012271	833.08536037777	705.477693322905	574.145754990679	921.905808275072	985.49806814945	1088.15933590208	882.77953697539	886.433951939444	704.518343450467	889.82040937202	-0.33811599629612	0.0202878839781145	0.373272423379487	Rpl14-ps1	7	44974389	44975041	+	653	processed_pseudogene	ribosomal protein L14, pseudogene 1 [Source:MGI Symbol;Acc:MGI:3710579]	-	719	574	649	679	612	611	572	961	1139	1297	991	1019	44.3840403125176	38.872375104517	36.353073618437	43.054339111835	48.9923051391242	42.551357818668	33.9465643518215	55.503493130559	59.5586993496465	64.9931757351648	52.5881710886771
ENSMUSG00000067786	8167.90936116086	13423.7052220737	15184.8600920306	9212.14575678116	19194.99455341	18044.526008593	18474.043043013	16177.9599903754	16178.9537983552	20367.9600599035	15938.1346877535	33239.9683391149	13871.3568323416	20062.8366530859	-0.532454491738859	0.0203211048827013	0.373278534171983	Nnat	2	157401998	157404442	+	1829	protein_coding	neuronatin [Source:MGI Symbol;Acc:MGI:104716]	-	7888	12189	16500	8753	14101	15628	18405	16864	18699	24277	17892	38211	173.845847362799	294.711265497292	329.974104671989	198.154325581365	403.019296128384	388.575210670748	389.973499536044	347.741880311024	349.091551439947	434.332448537149	338.978987375418
ENSMUSG00000024039	134.613110668219	124.446524743156	221.79098679875	158.920828204496	223.245096571821	200.905267820271	216.810285101375	219.684110400615	205.924969464064	396.838369993589	192.412088785756	268.800874533158	177.320302467785	250.078449713093	-0.497733755581445	0.02041155127364	0.374381064045365	Cbs	17	31827868	31856212	-	7485	protein_coding	cystathionine beta-synthase [Source:MGI Symbol;Acc:MGI:88285]	-	130	113	241	151	164	174	216	229	238	473	216	309	0.700104182798535	0.667619486728907	1.17770049694752	0.835305761143153	1.14535911517132	1.05716514929973	1.11834274812929	1.15386177867555	1.08572494133435	2.06780842035081	0.999975916274625
ENSMUSG00000018572	564.339579339841	511.001659122339	623.959705599803	502.02142419566	559.473992018404	539.211264781991	553.06697727249	674.401439352107	679.206306845758	620.007516755312	619.994508309658	686.355631089521	550.001270843006	638.838729937474	-0.215758949980999	0.0204461377964071	0.374381064045365	Phf23	11	69886603	69890835	+	3273	protein_coding	PHD finger protein 23 [Source:MGI Symbol;Acc:MGI:1925496]	-	545	464	678	477	411	467	551	703	785	739	696	789	6.71214951113924	6.26923198978221	7.57693059259425	6.03438073049747	6.56425509074722	6.48867869393166	6.52406941167213	8.10064182081352	8.18951746903203	7.38821281266277	7.36869919768311
ENSMUSG00000027208	30.0290785336796	50.6596472405767	72.7032695315405	39.993321005105	100.73254357509	73.8961904626283	91.3413701121535	102.647160754873	103.827715696167	106.550682852401	63.2465662212439	96.5595374536588	61.3356750581033	94.0288388484162	-0.623403001006648	0.0204740899851377	0.374381064045365	Fgf7	2	125876578	125933105	+	3248	protein_coding	fibroblast growth factor 7 [Source:MGI Symbol;Acc:MGI:95521]	-	29	46	79	38	74	64	91	107	120	127	71	111	0.359909327489494	0.626302545543697	0.889653089232728	0.484426519512664	1.1909823687039	0.896085288772833	1.08577128339241	1.2424469868355	1.26153669524686	1.27946574723712	0.757477822627892
ENSMUSG00000047843	503.245936805803	664.081897523212	597.27116361987	551.486847544079	499.578966108891	566.922336205476	672.513384342229	594.777940822627	644.597068280369	648.532896416584	679.677887701537	706.363463174513	563.764524634555	657.74377345631	-0.221570054680297	0.0204794514438949	0.374381064045365	Bri3	5	144181247	144383567	+	1648	protein_coding	brain protein I3 [Source:MGI Symbol;Acc:MGI:1933174]	-	486	603	649	524	367	491	670	620	745	773	763	812	11.8874906030996	16.1808924224269	14.4044642432278	13.1654107648444	11.6412198177393	13.5490759993711	15.7554414012805	14.1887648818725	15.4359629535323	15.3484049836176	16.0433450661851
ENSMUSG00000096145	88.0162646676816	111.23096459344	49.6959057557365	106.298037408305	99.3712929862372	84.2878422464354	87.3263648324984	131.426738536613	166.989576078002	115.779482154578	108.677198295659	156.583033708636	89.8167179429727	127.797065600997	-0.51355051136027	0.0204947332505261	0.374381064045365	Vkorc1	7	127492235	127494789	-	840	protein_coding	vitamin K epoxide reductase complex, subunit 1 [Source:MGI Symbol;Acc:MGI:106442]	-	85	101	54	101	73	73	87	137	193	138	122	180	4.07897237821427	5.31721784318113	2.35138689913663	4.9785448268512	4.54290031449757	3.95210949235851	4.0137742827825	6.15108022267595	7.84535653699632	5.37577104508448	5.03278222808917
ENSMUSG00000041453	1031.34352481189	876.632156597805	986.555758706473	652.522605872765	1060.41420871615	532.283496926119	473.770622999302	1466.79914760935	1252.85443606708	1991.74268576064	1565.12981479895	1090.8618015035	856.625291938534	1306.85975145647	-0.60956180573502	0.0205969924285603	0.37443507653046	Rpl21	5	146769700	146773842	+	3400	protein_coding	ribosomal protein L21 [Source:MGI Symbol;Acc:MGI:1278340]	-	996	796	1072	620	779	461	472	1529	1448	2374	1757	1254	11.8084133235612	10.3532455989069	11.5325537850466	7.55045470537014	11.9770034238301	6.16605511611971	5.37992301432591	16.9605010622501	14.5420055822605	22.8477143803616	17.9069012410613
ENSMUSG00000116858	69.3775262674667	80.3946575774369	99.391811511473	64.1998047713527	98.0100423973847	53.1128868950141	109.408893870601	78.6641792700893	97.7710989472237	99.8388288144548	114.021978539707	151.363599251681	77.4144549033547	108.511429782293	-0.48840062232062	0.0206045838122745	0.37443507653046	Gm49797	17	3248385	3361395	+	4534	lncRNA	predicted gene, 49797 [Source:MGI Symbol;Acc:MGI:6215329]	-	67	73	108	61	72	46	109	82	113	119	128	174	0.595668194415784	0.712006092895192	0.871268193769196	0.557068566491799	0.830119495987133	0.461383128945783	0.931661097839479	0.682091200206581	0.851003977422961	0.858828423036646	0.978263945931555
ENSMUSG00000029605	111.83243040129	122.24393138487	137.123888103792	124.18978627901	121.151302407878	135.091473189492	167.6264704256	145.816527427483	134.976030405017	146.821807080081	152.32623695539	179.200583022106	125.272135294389	154.461275885946	-0.300563208454104	0.0206113136137117	0.37443507653046	Oas1b	5	120950700	120962228	+	1992	protein_coding	2'-5' oligoadenylate synthetase 1B [Source:MGI Symbol;Acc:MGI:97430]	-	108	111	149	118	89	117	167	152	156	175	171	206	2.18547350668319	2.46420032455668	2.73593991053046	2.4527484355118	2.33555611151344	2.67104940934282	3.24892822086466	2.87782488652151	2.67405248092889	2.87468112896302	2.97463970325041
ENSMUSG00000000295	185.351898535471	139.864678251157	104.913578817666	143.133990965639	110.261297697058	142.019241045364	147.551444027325	174.596105209223	160.932959329059	221.491183252236	211.118819639927	170.501525593848	137.590780885392	181.032006175269	-0.395721383737722	0.0206666789834085	0.37502738943791	Hddc2	10	31189379	31204200	+	3508	protein_coding	HD domain containing 2 [Source:MGI Symbol;Acc:MGI:1916942]	-	179	127	114	136	81	123	147	182	186	264	237	196	2.05685923532194	1.60098219489981	1.18865244236097	1.60523883462829	1.20702167022701	1.59452348741226	1.62394280540368	1.95668949479958	1.81045619685029	2.46255140828817	2.34108054182476
ENSMUSG00000039765	440.081323338408	443.822561694617	461.067570067111	525.175452145984	528.165228474795	529.974240974162	519.943183715336	556.405170446973	545.095507404876	533.59239601675	623.557695139024	682.876008118218	488.04772944918	576.911660140196	-0.242812692497559	0.0207247594313709	0.375254792473295	Cc2d2a	5	43819688	43898314	+	6809	protein_coding	coiled-coil and C2 domain containing 2A [Source:MGI Symbol;Acc:MGI:1924487]	-	425	403	501	499	388	459	518	580	630	636	700	785	2.51603524577764	2.61736371673728	2.69131177861724	3.03443295001658	2.97877722374104	3.06559476251969	2.94821672114885	3.21258605183106	3.15930734723887	3.05643204872274	3.56239686398238
ENSMUSG00000099210	0	0	0	0	0	0	3.01125395974133	8.633873334522	4.32615482067362	0	3.56318682936585	0	0	3.25574482405047	-4.00942267982283	0.0207345942689512	1	Mir7051	7	43106921	43106993	+	73	miRNA	microRNA 7051 [Source:MGI Symbol;Acc:MGI:5531067]	-	0	0	0	0	0	0	3	9	5	0	4	0	0	0	0	0	0	0	1.59261709850604	4.6497516731757	2.33873926150788	0	1.8987366142353
ENSMUSG00000041202	42.4549041338229	133.2568981763	77.3047422867012	58.9375256917337	68.0625294426282	113.1535416459	138.517682148101	174.596105209223	90.8492512341459	111.584573380861	94.4244509781951	155.71312796581	82.1950235628475	127.614198486056	-0.634754073304615	0.0207572445455563	0.375430426319574	Pla2g2d	4	138503046	138509357	+	2243	protein_coding	phospholipase A2, group IID [Source:MGI Symbol;Acc:MGI:1341796]	-	41	121	84	56	50	98	138	182	105	133	106	179	0.736827299077912	2.38560459418711	1.36980779382012	1.03375848582865	1.16528019109008	1.98692830303686	2.38431039535591	3.06021700747077	1.59843392237699	1.9402751916004	1.63758625958011
ENSMUSG00000094281	5.17742733339304	11.0129667914297	6.4420618572251	2.10491163184763	6.80625294426282	6.9277678558714	17.0637724385342	11.511831112696	7.78707867721251	16.7796350948664	16.0343407321463	11.3087746567348	6.41189806900495	13.414238785365	-1.07014186044287	0.0207610287296233	1	Gm8034	19	6094721	6094852	-	132	processed_pseudogene	predicted gene 8034 [Source:MGI Symbol;Acc:MGI:3644144]	-	5	10	7	2	5	6	17	12	9	20	18	13	1.52688805601604	3.35018225943005	1.93969626359756	0.627359384121663	1.98009353682958	2.06710583660097	4.99100459405556	3.42860476910936	2.32810862850103	4.95789160943233	4.72526498315377
ENSMUSG00000022217	530.168558939447	783.021938870652	725.19210621334	655.679973320537	558.112741429552	581.932499893198	748.798484655676	899.841465309071	856.578654493376	750.049688740526	750.941624288854	667.217704747354	639.017969777788	778.904603705809	-0.284586461418996	0.0208193780154711	0.376141328465918	Emc9	14	55818973	55822759	-	2465	protein_coding	ER membrane protein complex subunit 9 [Source:MGI Symbol;Acc:MGI:1934682]	-	512	711	788	623	410	504	746	938	990	894	843	767	8.37267362091584	12.7554282114414	11.692810579795	10.4648126394785	8.69473932764435	9.29820264350163	11.7282950575311	14.3514580152821	13.7136459577424	11.8675633477868	11.8505428502461
ENSMUSG00000034810	1852.48349988803	1936.07956193334	2317.30167949897	2413.28118591331	1968.36835148081	2813.82837745977	2597.70841593685	2875.07982039583	2201.14757275874	2745.98728327488	2629.631880072	3278.67474471027	2216.89044269571	2721.37161952476	-0.29572581293382	0.0208570230690711	0.376408728487496	Scn7a	2	66503769	66615258	-	7338	protein_coding	sodium channel, voltage-gated, type VII, alpha [Source:MGI Symbol;Acc:MGI:102965]	-	1789	1758	2518	2293	1446	2437	2588	2997	2544	3273	2952	3769	9.82751596217157	10.5945747396334	12.5512690361231	12.9385819670488	10.3010197209522	15.1029997715351	13.6678292322229	15.4034905182922	11.8378835032203	14.5951734762381	13.9401112503833
ENSMUSG00000101067	62.1291280007164	46.2544605240048	98.4715169604409	65.2522605872766	78.9525341534488	54.2675148709927	114.42765047017	78.6641792700893	78.7360177362598	101.516792323941	134.510302808561	77.4216111114922	67.5545691828133	97.5460922867524	-0.527442913665114	0.0210070079008839	0.377245369334397	Gm29007	12	37142784	37156788	-	5397	lncRNA	predicted gene 29007 [Source:MGI Symbol;Acc:MGI:5579713]	-	60	42	107	62	58	47	114	82	91	121	151	89	0.448136127613378	0.344143235988146	0.725171921624497	0.475663257332934	0.561778622122188	0.396032506030276	0.818588073236199	0.573022327540604	0.575736331821266	0.733624650600826	0.969509621026299
ENSMUSG00000029798	189.493840402185	159.688018475731	171.174786491981	111.560316487924	178.323827139686	204.369151748206	244.915322058961	206.253640769137	216.307741033681	248.338599404022	182.613325005	201.818132335575	169.101656790952	216.707793434396	-0.358919888455186	0.0210165347823485	0.377245369334397	Herc6	6	57557985	57641617	+	9292	protein_coding	hect domain and RLD 6 [Source:MGI Symbol;Acc:MGI:1914388]	-	183	145	186	106	131	177	244	215	250	296	205	232	0.793876622495122	0.690082742633354	0.732172416577197	0.472342472160478	0.736973255248752	0.866262389983229	1.01763867694754	0.872648544871247	0.918682555370616	1.0423737675621	0.764490783255255
ENSMUSG00000057322	1223.94382161411	1031.91498835696	958.026627624476	1014.56740655056	952.875412196795	805.93032723304	703.629675259556	1129.1187683036	1604.13820750578	1656.98896561805	1590.96291931185	1364.01220475078	997.876430595991	1341.47512345827	-0.427038371364787	0.0211819903480062	0.378457772001678	Rpl38	11	114559350	114563157	+	542	protein_coding	ribosomal protein L38 [Source:MGI Symbol;Acc:MGI:1914921]	-	1182	937	1041	964	700	698	701	1177	1854	1975	1786	1568	87.9081852589837	76.4509119142706	70.2523834932702	73.6441207663408	67.5131523258498	58.5654561380894	50.1223830146678	81.9006382761233	116.800608535424	119.236378466698	114.185185558473
ENSMUSG00000020798	66.2710698674309	47.3557572031478	22.0870692247718	62.0948931395051	16.3350070662308	94.6794940302425	47.1763120359474	85.3794140858287	62.2966294177001	118.296427418808	127.383929149829	125.266426966909	51.4705484218881	94.2998565125037	-0.873287827909333	0.021200250261428	0.378457772001678	Spns3	11	72385745	72441332	-	5508	protein_coding	spinster homolog 3 [Source:MGI Symbol;Acc:MGI:1924827]	-	64	43	24	59	12	82	47	89	72	141	143	144	0.468378732651542	0.345236646777868	0.159377470771788	0.443525316225446	0.113887732837257	0.677025949387826	0.330686835207833	0.609405241277789	0.446347623764903	0.837656850351802	0.899641953340702
ENSMUSG00000038811	136.684081601576	185.017842096019	161.97184098166	127.347153726782	190.575082439359	166.266428540914	155.581454586635	252.300965219921	221.499126818489	180.381077269813	206.66483610322	224.435681649045	161.310404897718	206.810523607854	-0.361499717681093	0.0213442118118078	0.379793280802546	Gngt2	11	95728042	95736560	+	1877	protein_coding	guanine nucleotide binding protein (G protein), gamma transducing activity polypeptide 2 [Source:MGI Symbol;Acc:MGI:893584]	-	132	168	176	121	140	144	155	263	256	215	232	258	2.83478929014634	3.95810558258502	3.42971486383274	2.66920194011487	3.89900144492388	3.48886057024606	3.20022419989272	5.28447181514831	4.65704414694292	3.74813436003435	4.28303187249455
ENSMUSG00000018126	12.4258256001433	3.30389003742891	3.68117820412863	27.3638512140192	14.9737564773782	3.4638839279357	20.0750263982755	32.6168548193053	6.92184771307779	39.4321424729359	55.2293958551707	13.9184918852121	10.8687309101723	28.0322931906629	-1.37107422923348	0.0214067548988262	0.380085237573232	Baiap2l2	15	79142395	79169737	-	2728	protein_coding	BAI1-associated protein 2-like 2 [Source:MGI Symbol;Acc:MGI:2652819]	-	12	3	4	26	11	3	20	34	8	47	62	16	0.17731603231154	0.0486316779594685	0.0536321547538495	0.394629290012014	0.210784150694761	0.0500106250790556	0.284117908580013	0.470050653829509	0.100133704451657	0.563760255588676	0.787544163858961
ENSMUSG00000072553	27.9581076003224	18.7220435454305	14.7247128165145	11.577013975162	10.8900047108205	11.5462797597857	49.183814675775	10.5525118533047	32.0135456729848	29.3643614160161	34.7410715863171	23.4874550562954	15.9030270680059	29.8904600434488	-0.902017449644063	0.0214890271072118	0.380592202189441	Gm525	11	88964667	88983866	+	763	protein_coding	predicted gene 525 [Source:MGI Symbol;Acc:MGI:2685371]	-	27	17	16	11	8	10	49	11	37	35	39	27	1.42642962821524	0.985296066862521	0.767017133255577	0.596936976241583	0.548094043222027	0.596020031523214	2.48876861570822	0.543723692086805	1.65581513639129	1.50101305606667	1.77120024270246
ENSMUSG00000018821	199.848695068971	148.675051684301	158.290662777531	148.396270045258	160.627569484603	109.689657717964	177.663983624738	210.090917806702	186.8898882531	250.016562913509	252.095468177634	149.62378776603	154.254651129771	204.396768090286	-0.405577718451276	0.021504602794099	0.380592202189441	Avpi1	19	42111712	42117498	-	1236	protein_coding	arginine vasopressin-induced 1 [Source:MGI Symbol;Acc:MGI:1916784]	-	193	135	172	141	118	95	177	219	216	298	283	172	6.29433658819814	4.83011714102294	5.09002126314366	4.7234679843335	4.99060468117435	3.4953488660971	5.54967786671969	6.68245055726896	5.96719104780846	7.88930519209669	7.93406143072151
ENSMUSG00000047636	0	1.10129667914297	1.84058910206432	2.10491163184763	1.36125058885256	2.30925595195713	5.01875659956888	0.959319259391334	7.78707867721251	12.5847263211498	1.78159341468293	6.95924594260604	1.45288399231077	5.84845336910191	-2.01748231773029	0.0215654971610368	1	Cdcp2	4	106954088	106970322	+	3117	protein_coding	CUB domain containing protein 2 [Source:MGI Symbol;Acc:MGI:3045328]	-	0	1	2	2	1	2	5	1	9	15	2	8	0	0.0141874898378174	0.0234694446853547	0.0265676736297913	0.0167707633533208	0.0291795498268985	0.0621650348577378	0.0120996639269178	0.0985917032281475	0.157469127152326	0.0222341631118346
ENSMUSG00000021461	267.155250403081	342.503267213464	281.61013261584	304.159730801983	299.475129547564	322.14120529802	359.342972529132	400.995450425577	371.184083613796	319.652048557204	313.560440984195	402.766358928325	302.840785979992	361.250225839705	-0.254984683113738	0.0216456157737684	0.381448995833564	Fancc	13	63432857	63645092	-	8359	protein_coding	Fanconi anemia, complementation group C [Source:MGI Symbol;Acc:MGI:95480]	-	258	311	306	289	220	279	358	418	429	381	352	463	1.24416077606609	1.64531262249219	1.33898811339758	1.43154120023168	1.37580850124491	1.51787242792879	1.65974619182346	1.8859582160982	1.75241769237091	1.49146001209218	1.45920373368197
ENSMUSG00000027996	288.900445203331	285.235839898029	288.972489024098	567.273684782936	307.64263308068	234.389479123649	268.001602416978	629.313434160715	507.025344982948	425.363749654862	654.735579895976	400.156641699847	328.735761852121	480.766058801888	-0.548205299089674	0.0218259223135638	0.383805466340011	Sfrp2	3	83673628	83681623	+	2153	protein_coding	secreted frizzled-related protein 2 [Source:MGI Symbol;Acc:MGI:108078]	-	279	259	314	539	226	203	267	656	586	507	735	460	5.22361665833335	5.31983423527147	5.33451866057936	10.3658535674612	5.487241095281	4.28782845622848	4.80596065443278	11.4913200250316	9.29369141930183	7.70557217997328	11.8296229722242
ENSMUSG00000031297	14.4967965335005	8.81037343314377	13.8044182654824	24.2064837662478	5.44500235541026	20.7833035676142	23.0862803580168	23.023662225392	21.6307741033681	26.8474161517862	32.0686814642927	26.9670780275984	14.5910629868998	25.6039820550757	-0.799944970510242	0.0219990100895543	0.386025228163564	Slc7a3	X	100122816	100129626	-	3784	protein_coding	solute carrier family 7 (cationic amino acid transporter, y+ system), member 3 [Source:MGI Symbol;Acc:MGI:1100521]	-	14	8	15	23	4	18	23	24	25	32	36	31	0.149137903145752	0.0934934584026992	0.144993906747326	0.251673241304621	0.0552584242836161	0.216325029411729	0.235553568392499	0.23920498389135	0.225591921366379	0.276719531689246	0.329669649987472
ENSMUSG00000018868	5.17742733339304	8.81037343314377	8.28265095928942	4.20982326369526	1.36125058885256	8.08239583184997	18.067523758448	23.023662225392	11.2480025337514	11.7457445664064	17.8159341468293	3.47962297130302	5.98732023503734	14.230081700355	-1.22613574263166	0.0222998597617466	1	Pnpla5	15	83996557	84007376	-	2172	protein_coding	patatin-like phospholipase domain containing 5 [Source:MGI Symbol;Acc:MGI:1923022]	-	5	8	9	4	1	7	18	24	13	14	20	4	0.0927943017468309	0.162881789408754	0.151562691472895	0.0762536267993182	0.0240674352542821	0.146562752687177	0.321163116549561	0.41673649127296	0.204370493477991	0.210915830898502	0.319078666756853
ENSMUSG00000020902	927.794978144032	894.252903464092	977.352813196151	1216.63892320793	680.625294426282	1472.15066937267	1183.42280617834	1191.47452016404	1131.72210108822	1542.04846521822	1481.39492430885	1549.30212797267	1028.13593030186	1346.56082415506	-0.389047233862273	0.0223999923628746	0.390271337727498	Ntn1	11	68100190	68291649	-	6277	protein_coding	netrin 1 [Source:MGI Symbol;Acc:MGI:105088]	-	896	812	1062	1156	500	1275	1179	1242	1308	1838	1663	1781	5.75396221638135	5.72066170614546	6.18845174027993	7.62545986473577	4.16396920282785	9.23726600552129	7.27904921762624	7.46241809073953	7.11525186062828	9.58151848585339	9.18052916327671
ENSMUSG00000053411	990.959591611427	920.684023763524	872.439234378485	954.5774250429	947.430409841385	1349.76010391894	1250.67414461256	1267.26074165595	872.152811847801	1117.5236973181	1620.35921065412	1749.38044882259	1005.97513142611	1312.89184248519	-0.384325533709616	0.0224067904042127	0.390271337727498	Cbx7	15	79800008	79855320	-	6487	protein_coding	chromobox 7 [Source:MGI Symbol;Acc:MGI:1196439]	-	957	836	948	907	696	1169	1246	1321	1008	1332	1819	2011	5.94674292548696	5.69907989351973	5.34532431107366	5.78926891510575	5.60860654896275	8.19513302076517	7.44367021457853	7.68013810697211	5.30580514317238	6.71894816045036	9.71664632320268
ENSMUSG00000098785	0	0	0	1.05245581592382	0	1.15462797597857	6.02250791948265	5.755915556348	0	5.87287228320322	0	5.21943445695453	0.367847298650397	3.8117883693314	-3.27602712307289	0.022568217365385	1	Mir6395	8	34633776	34633866	-	91	miRNA	microRNA 6395 [Source:MGI Symbol;Acc:MGI:5530943]	-	0	0	0	1	0	1	6	6	0	7	0	6	0	0	0	0.45500790496736	0	0.499739872584849	2.55518787232838	2.4866803819914	0	2.51708343248103	0
ENSMUSG00000120153	18.6387384002149	37.444087090861	31.2900147350934	45.2556000847241	16.3350070662308	26.556443447507	46.1725607160337	47.0066437101753	40.665855314332	32.7202884349894	57.0109892698537	52.1943445695453	29.2533151374385	45.9617803358216	-0.642534092555385	0.0226647916335408	0.391865447792079	ENSMUSG00000120153	3	98286544	98289727	-	3184	lncRNA	novel transcript	-	18	34	34	43	12	23	46	49	47	39	64	60	0.227882287757167	0.47222418279906	0.390584926015157	0.559185280193869	0.197014331805154	0.328503628555304	0.559883607284684	0.580407654067193	0.50403356823075	0.400804428476094	0.696521471553654
ENSMUSG00000083596	689.633320807953	755.489521892078	690.220913274118	638.840680265756	661.567786182346	714.714717130733	568.123247071197	886.410995677592	808.125720501832	1063.82886501453	949.589290026	854.247439454891	691.744489925497	855.05425962434	-0.306216546587816	0.0228167844178244	0.392857681759413	Rpl21-ps15	X	149998163	149998645	-	483	processed_pseudogene	ribosomal protein L21, pseudogene 15 [Source:MGI Symbol;Acc:MGI:3705426]	-	666	686	750	607	486	619	566	924	934	1268	1066	982	55.5825187496819	62.8086343594017	56.7967850033002	52.0357591028614	52.5991555174704	58.2812573143519	45.4132182719619	72.1497699238665	66.0289525168242	85.9039405818163	76.4782017839352
ENSMUSG00000065530	9.31936920010747	8.81037343314377	7.36235640825726	3.15736744777145	4.08375176655769	1.15462797597857	3.01125395974133	26.8609392629573	12.9784644620208	11.7457445664064	32.0686814642927	6.08934019978029	5.64797437196937	15.4590706525332	-1.44067580904508	0.0228178445696983	0.392857681759413	Mir99a	16	77395824	77395888	+	65	miRNA	microRNA 99a [Source:MGI Symbol;Acc:MGI:2676912]	-	9	8	8	3	3	1	3	28	15	14	36	7	5.58136310937554	5.44275763993559	4.50180055903081	1.91103320086291	2.41266781718311	0.699635821618789	1.78863151062987	16.2463118290105	7.8797522810804	7.04783361094688	19.1918454700399
ENSMUSG00000027317	1.03548546667861	0	0	1.05245581592382	0	0	2.00750263982755	1.91863851878267	0.865230964134723	4.19490877371659	2.67239012202439	5.21943445695453	0.34799021376707	2.81301757924007	-2.8451555058861	0.022836768335052	1	Ppp1r14d	2	119048600	119060387	-	852	protein_coding	protein phosphatase 1, regulatory inhibitor subunit 14D [Source:MGI Symbol;Acc:MGI:1919362]	-	1	0	0	1	0	0	2	2	1	5	3	6	0.0473120242709194	0	0	0.0485982621502697	0	0	0.0909710862213938	0.0885320480286454	0.0400769873450881	0.192031013041393	0.122013884541529
ENSMUSG00000056014	95.2646629344319	92.5089210480096	93.8700442052801	69.4620838509718	70.7850306203334	70.4323065346926	96.3601267117224	103.606480014264	90.8492512341459	105.711701097658	155.889423784756	107.868312110394	82.0538415322866	110.047549158823	-0.419954573702367	0.0228598808099352	0.392857681759413	A430033K04Rik	5	138621121	138650676	+	4097	protein_coding	RIKEN cDNA A430033K04 gene [Source:MGI Symbol;Acc:MGI:3583896]	zf-C2H2	92	84	102	66	52	61	96	108	105	126	175	124	0.905175911752928	0.906683448683437	0.910633930509344	0.667019154804483	0.663478742338209	0.677094467346472	0.908067742765467	0.994186591579672	0.875100631655256	1.0063418751291	1.48012937801172
ENSMUSG00000086332	6.21291280007164	3.30389003742891	15.6450073675467	7.36719071146671	8.16750353311539	16.1647916636999	26.0975343177582	13.4304696314787	11.2480025337514	10.9067628116631	28.5054946349268	30.4467009989014	9.47688268555488	20.1058274880799	-1.07758819376217	0.0228889536339508	0.392857681759413	4930480G23Rik	4	19933841	20005671	-	3155	transcribed_unitary_pseudogene	RIKEN cDNA 4930480G23 gene [Source:MGI Symbol;Acc:MGI:1922238]	-	6	3	17	7	6	14	26	14	13	13	32	35	0.0766589756174137	0.0420498312118637	0.197087544284035	0.0918668892121105	0.0994126200424104	0.201796702907479	0.319364738823505	0.167355034688698	0.140694995827003	0.134829508744626	0.351461864568437
ENSMUSG00000016206	187.422869468828	205.942478999736	178.537142900239	146.29135841341	149.737564773782	202.059895796249	230.862803580168	234.073899291485	243.129900921857	215.618310969033	179.940934882976	218.346341449265	178.331885058707	220.328698515797	-0.303353700272169	0.0229496560144113	0.392857681759413	H2-M3	17	37581111	37585375	+	1438	protein_coding	histocompatibility 2, M region locus 3 [Source:MGI Symbol;Acc:MGI:95915]	-	181	187	194	139	110	175	230	244	281	257	202	251	5.07377043592978	5.750757920151	4.93460579358297	4.00236091094029	3.99874244155291	5.53432369326406	6.19843326006409	6.39942642579243	6.67240034371505	5.84810552706476	4.86765822557611
ENSMUSG00000028076	6218.09022740504	8118.75911864198	7871.27929497804	6502.07203077733	6652.43162772248	7677.12141228149	8182.5807599371	9057.89244717297	9861.03729824344	9045.06229788771	7740.13259008998	7088.86189828708	7173.29228530106	8495.92788193638	-0.244103295947103	0.0229643431131729	0.392857681759413	Cd1d1	3	86903141	86906748	-	2570	protein_coding	CD1d1 antigen [Source:MGI Symbol;Acc:MGI:107674]	-	6005	7372	8553	6178	4887	6649	8152	9442	11397	10781	8689	8149	94.1870106211417	126.85119678523	121.729256410038	99.534838193323	99.4028528491961	117.654516562769	122.926078450396	138.560991645617	151.423084010007	137.267235141056	117.155927840429
ENSMUSG00000019772	0	0	0	0	1.36125058885256	0	0	2.877957778174	4.32615482067362	8.38981754743318	0	4.34952871412878	0.226875098142094	3.32390981006826	-3.56779160899404	0.022974179453095	1	Vip	10	5589218	5597617	+	3402	protein_coding	vasoactive intestinal polypeptide [Source:MGI Symbol;Acc:MGI:98933]	-	0	0	0	0	1	0	0	3	5	10	0	5	0	0	0	0	0.0153658052240743	0	0	0.0332580709525599	0.0501845873280645	0.0961848460383697	0
ENSMUSG00000072915	153.251849068434	134.358194855442	190.500972063657	168.39293054781	151.098815362635	157.029404733085	203.761517942496	193.782490397049	137.571723297421	218.974237988006	254.767858299659	220.086152934916	159.105361105177	204.823996809925	-0.362425135095449	0.022993970530202	0.392857681759413	Gm12258	11	58737984	58752782	+	4429	protein_coding	predicted gene 12258 [Source:MGI Symbol;Acc:MGI:3651534]	zf-C2H2	148	122	207	160	111	136	203	202	159	261	286	253	1.34699864810699	1.218138069674	1.70952039178594	1.49580381492995	1.31010749612224	1.39642823732447	1.77624691674276	1.72010833076563	1.22581831602267	1.92830528029084	2.23762830390634
ENSMUSG00000033739	133.57762520154	150.877645042587	111.355640674891	99.9833025127624	100.73254357509	103.916517838071	146.547692707411	158.28767779957	132.380337512613	171.99125972238	163.015797443488	125.266426966909	116.74054580749	149.581532025395	-0.355769149166183	0.0230044050073256	0.392857681759413	Fkbpl	17	34863738	34865298	+	1336	protein_coding	FK506 binding protein-like [Source:MGI Symbol;Acc:MGI:1932127]	-	129	137	121	95	74	90	146	165	153	205	183	144	3.89219308650315	4.53478263319858	3.31274900793201	2.94426896590032	2.89544216583103	3.0635251171182	4.23505814268399	4.6578724969562	3.91038604966789	5.02097855356433	4.74648623307811
ENSMUSG00000097827	4.14194186671443	8.81037343314377	3.68117820412863	12.6294697910858	6.80625294426282	10.3916517838071	10.0375131991378	19.1863851878267	8.65230964134723	14.2626898306364	18.7067308541707	24.3573607991211	7.74347800385709	15.8671649187067	-1.04438002594365	0.0230096320635907	0.392857681759413	5330439K02Rik	15	100357621	100366572	-	2312	lncRNA	RIKEN cDNA 5330439K02 gene [Source:MGI Symbol;Acc:MGI:1925532]	-	4	8	4	12	5	9	10	20	10	17	21	28	0.0697402157073068	0.153018705275006	0.0632822310417393	0.214908577951712	0.113050323036983	0.177027229951121	0.167619734992707	0.326251318859887	0.147688551981034	0.240603563398922	0.314745158912491
ENSMUSG00000038816	677.207495207809	585.889833304061	693.902091478247	610.424373235813	521.358975530532	705.477693322905	864.22988644576	874.899164564896	717.276469267686	644.337987642868	711.746569165829	733.330541202111	632.376743679894	757.636769714858	-0.258909414142536	0.0230366051019699	0.392857681759413	Ctnnal1	4	56810935	56865188	-	7661	protein_coding	catenin (cadherin associated protein), alpha-like 1 [Source:MGI Symbol;Acc:MGI:1859649]	-	654	532	754	580	383	611	861	912	829	768	799	843	3.44114846886183	3.07092023216572	3.59994200166591	3.13474967030117	2.61338229599154	3.62694643722624	4.3554262930166	4.4897223657101	3.69490886016636	3.28032384674202	3.61400634703376
ENSMUSG00000026896	652.355844007523	594.700206737204	657.090309436961	520.965628882289	668.374039126609	704.323065346926	871.256145685157	773.211323069415	709.489390590473	661.956604492477	676.114700872171	803.792906370998	632.968182256252	749.303511846782	-0.243345460952646	0.0231375053910193	0.393839541660977	Ifih1	2	62426142	62476599	-	8165	protein_coding	interferon induced with helicase C domain 1 [Source:MGI Symbol;Acc:MGI:1918836]	-	630	540	714	495	491	610	868	806	820	789	759	924	3.11025133467957	2.92469064852632	3.19853894587599	2.51020588845741	3.14351065055722	3.39749667203735	4.11980362644364	3.72296508057851	3.42919613457102	3.16199935908854	3.22116655189637
ENSMUSG00000120970	18.6387384002149	22.0259335828594	18.4058910206432	15.7868372388572	25.8637611881987	15.0101636877214	22.0825290381031	43.16936667261	18.1698502468292	30.2033431707594	33.8502748789756	40.0156641699847	19.2885541864158	31.2485046962103	-0.703421895777127	0.0231912873730677	0.394347618210564	ENSMUSG00000120970	8	72043373	72044735	-	1363	lncRNA	novel transcript	-	18	20	20	15	19	13	22	45	21	36	38	46	0.532338374335158	0.648898104541111	0.536715033633534	0.455675561467679	0.728697665497957	0.433743411054935	0.625517989777625	1.24516460800377	0.526087643124223	0.864266358328042	0.966084990441807
ENSMUSG00000106547	22.7806802669294	2.20259335828594	17.485596469611	13.6819256070096	21.780009421641	21.9379315435928	46.1725607160337	29.7388970411313	17.3046192826945	26.0084343970428	31.1778847569512	37.4059469415075	16.6447894445116	31.3013905225602	-0.91263682816153	0.0234675880595369	0.396207605645746	B230303O12Rik	5	146125430	146131619	-	3645	lncRNA	RIKEN cDNA B230303O12 gene [Source:MGI Symbol;Acc:MGI:2442644]	-	22	2	19	13	16	19	46	31	20	31	35	43	0.243296730571773	0.0242646945538967	0.190662677997361	0.147674719225346	0.229462691346176	0.23705082021926	0.489072539257732	0.320755617631355	0.187355792691441	0.27829482120435	0.332734708461674
ENSMUSG00000030048	19.6742238668935	20.9246369037165	19.3261855716753	14.7343814229334	39.4762670767244	30.0203273754427	42.1575554363786	79.6234985294807	28.5526218164459	20.1355621138396	32.9594781716341	51.3244388267196	24.0260037028976	42.4588591490831	-0.830418656834591	0.0235204383874825	0.396207605645746	Gkn3	6	87360238	87365917	-	856	protein_coding	gastrokine 3 [Source:MGI Symbol;Acc:MGI:1916138]	-	19	19	21	14	29	26	42	83	33	24	37	59	0.894727860861733	0.981572091898431	0.897336121944664	0.677196344542543	1.77098085490271	1.38129034875672	1.90146574144063	3.65691139508977	1.31636048620852	0.917441624922992	1.49780595649812
ENSMUSG00000032688	698.95269000806	602.409283491205	434.379028087178	596.742447628803	415.181429600032	643.127782620062	861.218632486019	893.126230493332	609.98782971498	677.058276077857	830.222531242244	543.691089266097	565.132110239223	735.884098213421	-0.380118472730177	0.0235935104420117	0.396207605645746	Malt1	18	65564009	65612138	+	18040	protein_coding	MALT1 paracaspase [Source:MGI Symbol;Acc:MGI:2445027]	-	675	547	472	567	305	557	858	931	705	807	932	625	1.50826746996706	1.34089002139627	0.957006937022348	1.30138818584262	0.883797846926372	1.40411945242285	1.84316295912468	1.94636039026879	1.33440372609205	1.4637872666385	1.7902223432111
ENSMUSG00000090733	820.104489609457	550.648339571486	435.299322638211	633.578401186137	1291.82680882108	2058.70168116978	1338.00050944506	1109.93238311577	1450.1270958898	1914.55636432425	3022.47322800959	2057.32708178291	965.026507166026	1815.40277709456	-0.91197393792516	0.0236148542575647	0.396207605645746	Rps27	3	90119829	90120958	-	1043	protein_coding	ribosomal protein S27 [Source:MGI Symbol;Acc:MGI:1888676]	-	792	500	473	602	949	1783	1333	1157	1676	2282	3393	2365	30.6092013285025	21.1996192830665	16.5877107127759	23.8986031159367	47.5632516148739	77.7414127962699	49.5289157042265	41.8368675900813	54.868661776983	71.5932858178161	112.726791285553
ENSMUSG00000009927	4248.59686978233	3973.47841834784	3792.53384480352	4104.57768210288	3879.56417822981	3922.27123439919	3930.69016878234	4309.26211318587	4544.19302363557	4746.11978658295	4642.83243866371	4422.60079652614	3986.83703794426	4432.6163878961	-0.153027939158667	0.0236212655757846	0.396207605645746	Rps25	9	44318436	44321724	+	2691	protein_coding	ribosomal protein S25 [Source:MGI Symbol;Acc:MGI:1922867]	-	4103	3608	4121	3900	2850	3397	3916	4492	5252	5657	5212	5084	61.4609040197741	59.2918767055786	56.0142515210325	60.0082889159852	55.3631503942985	57.4073160878992	56.3951770984424	62.9558598480979	66.6416408699424	68.7881206644695	67.1148004494418
ENSMUSG00000057098	1602.93150241848	1987.84050585306	2401.96877819393	1729.18490556283	1942.50459029261	2304.63744005322	2864.70626703391	2379.11176329051	2485.80855995906	2200.64914269172	1961.5343495659	2768.04007367155	1994.84462039569	2443.30835936878	-0.292398869682132	0.0236833760092561	0.396207605645746	Ebf1	11	44508144	44898918	+	9756	protein_coding	early B cell factor 1 [Source:MGI Symbol;Acc:MGI:95275]	COE	1548	1805	2610	1643	1427	1996	2854	2480	2873	2623	2202	3182	6.39602701545905	8.18177967539775	9.78539443470143	6.97310341281108	7.64613241023711	9.30409506937491	11.3369219467318	9.58716052698885	10.0553802086262	8.79766584298592	7.82119505411716
ENSMUSG00000036390	133.57762520154	154.181535080016	207.986568533268	141.029079333791	235.496351871494	199.750639844292	297.110390694477	232.155260772703	221.499126818489	313.779176274001	185.285715127024	193.119074907318	178.6702999774	240.491457432335	-0.4305151316183	0.0236860590244326	0.396207605645746	Gadd45a	6	67012080	67014441	-	1764	protein_coding	growth arrest and DNA-damage-inducible 45 alpha [Source:MGI Symbol;Acc:MGI:107799]	-	129	140	226	134	173	173	296	242	256	374	208	222	2.947828777533	3.50971474797434	4.68618553090722	3.1453324224331	5.12669115726079	4.45998005334653	6.50288553751296	5.17400560961967	4.95536953730831	6.9376755378247	4.0859434170279
ENSMUSG00000026277	1620.53475535202	1809.4304438319	1891.20530237108	1649.19826355262	1702.92448665456	1838.16773775788	2162.08034309427	2008.81452916545	1940.71305255418	1785.35317409378	1894.72459651529	2051.23774158313	1751.91016492001	1973.82057283435	-0.171632811720261	0.0237163445522331	0.396207605645746	Stk25	1	93547473	93586381	-	5812	protein_coding	serine/threonine kinase 25 (yeast) [Source:MGI Symbol;Acc:MGI:1891699]	-	1565	1643	2055	1567	1251	1592	2154	2094	2243	2128	2127	2358	10.854251018988	12.5012754249166	12.9328976615739	11.1635860675552	11.2517827227716	12.4566955989526	14.3626002410695	13.5881765746154	13.177660975225	11.9808320846791	12.6814664843827
ENSMUSG00000003934	3.10645640003582	11.0129667914297	6.4420618572251	11.577013975162	10.8900047108205	23.0925595195713	24.0900316779306	25.901620003566	17.3046192826945	10.9067628116631	23.160714390878	29.5767952560757	11.0201772090407	21.8234239038013	-0.996425702508771	0.023733501655177	0.396207605645746	Efnb3	11	69444918	69451031	-	3183	protein_coding	ephrin B3 [Source:MGI Symbol;Acc:MGI:109196]	-	3	10	7	11	8	20	24	27	20	13	26	34	0.0379923135521426	0.138933100296817	0.0804398073499458	0.143092338319927	0.131384151736854	0.28574507323419	0.292204959323761	0.319916938870713	0.214549753176344	0.133643449603925	0.283050745665929
ENSMUSG00000046718	782.827012809027	1001.07868134096	888.084241746032	544.119656832612	950.15291101909	792.074791521297	976.650034276103	1040.8613964396	1432.8224766071	1297.06579283317	740.252063800756	1028.22858802004	826.389549211503	1085.98005866279	-0.394546101591121	0.0238559278026938	0.397067501966732	Bst2	8	71986899	71990100	-	903	protein_coding	bone marrow stromal cell antigen 2 [Source:MGI Symbol;Acc:MGI:1916800]	-	756	909	965	517	698	686	973	1085	1656	1546	831	1182	33.7477769404102	44.516242408028	39.0885160666123	23.7062645681056	40.4070649190099	34.5479084008658	41.7578441822761	45.3160552816392	62.6191609845326	56.0225280465157	31.8889975718041
ENSMUSG00000026764	106.655003067897	66.0778007485783	80.0656259397977	150.501181677106	76.2300329757436	95.8341220062211	117.438904429912	108.403076311221	89.9840202700112	176.186168496097	213.791209761951	148.753882023204	95.8939610692238	142.426210215399	-0.569949250160188	0.0238672728344506	0.397067501966732	Kif5c	2	49509310	49664790	+	7142	protein_coding	kinesin family member 5C [Source:MGI Symbol;Acc:MGI:1098269]	-	103	60	87	143	56	83	117	113	104	210	240	171	0.581337720795128	0.37151279046046	0.445562905371731	0.829041986466012	0.409881025601911	0.528498355871376	0.63486150650332	0.596717408009371	0.497219503594731	0.962144745263681	1.16444502525212
ENSMUSG00000044433	281.652046936581	227.968412582595	231.914226860104	278.900791219811	156.543817718045	302.512529706385	305.140401253788	310.819440042792	241.399438993588	354.889282256423	338.502748789756	365.360411986817	246.581970837253	319.351953887194	-0.37117510155933	0.0238837957169317	0.397067501966732	Camsap3	8	3637293	3659075	+	6119	protein_coding	calmodulin regulated spectrin-associated protein family, member 3 [Source:MGI Symbol;Acc:MGI:1916947]	-	272	207	252	265	115	262	304	324	279	423	380	420	1.79184143694067	1.49600228888163	1.50636323657715	1.79318771503316	0.982442225496747	1.94718059195424	1.92533413139653	1.99698437605912	1.55689173195395	2.26204311083726	2.1519428697045
ENSMUSG00000006850	222.629375335901	177.308765342018	189.580677512624	227.330456239544	232.773850693789	189.358988060485	259.971591857668	255.178922998095	219.76866489022	237.431836592359	261.003435251049	247.053230962514	206.49701886406	246.734613758651	-0.258031214418425	0.0239230230062939	0.397067501966732	Tmco6	18	36868092	36875450	+	3363	protein_coding	transmembrane and coiled-coil domains 6 [Source:MGI Symbol;Acc:MGI:1919233]	-	215	161	206	216	171	164	259	266	254	283	293	284	2.57704924351681	2.11710001122235	2.2405259249711	2.65942176034446	2.65802386638818	2.21769784670124	2.9845982239522	2.98307985560927	2.57894162277009	2.75359796256251	3.01903638432047
ENSMUSG00000038608	614.042881740414	821.567322640656	724.271811662308	686.201191982328	641.149027349558	735.498020698347	839.136103447916	817.340009001416	837.543573282412	672.863367304141	876.543960024	971.684714736368	703.788376012269	835.851954632709	-0.247701890177202	0.0240586461062274	0.398406343610361	Dock10	1	80478790	80736244	-	18267	protein_coding	dedicator of cytokinesis 10 [Source:MGI Symbol;Acc:MGI:2146320]	-	593	746	787	652	471	637	836	852	968	802	984	1117	1.30857491074299	1.80598427465154	1.57585815676644	1.47788520378406	1.34785542641669	1.58583353556282	1.77358508581279	1.75906738359298	1.80943418377613	1.43664049198266	1.86661806089876
ENSMUSG00000070868	20.7097093335721	37.444087090861	13.8044182654824	27.3638512140192	23.1412600104936	42.721235111207	41.1538041164648	76.7455407513067	40.665855314332	18.457598604353	66.8097530506098	46.9749101125908	27.5307601709392	48.4679103249428	-0.818676738241247	0.0241452766156431	0.39900416174276	Skint3	4	112089442	112157665	+	3843	protein_coding	selection and upkeep of intraepithelial T cells 3 [Source:MGI Symbol;Acc:MGI:3045331]	-	20	34	15	26	17	37	41	80	47	22	75	54	0.209783214565825	0.391246889938123	0.142767874871684	0.28013237136424	0.231242773700004	0.437841309131717	0.413453289602619	0.785108560191578	0.41760158242173	0.187323929661612	0.676267431885135
ENSMUSG00000096956	183.280927602114	246.690456128026	228.233048655975	195.75678176183	247.747607171167	263.255178523113	242.907819419134	280.121223742269	382.432086147548	244.143690630305	269.020605617122	300.117481274886	227.493999973704	286.457151138544	-0.334657314335814	0.0243733551848377	0.399601764557782	Snhg18	15	32240711	32244848	-	1526	lncRNA	small nucleolar RNA host gene 18 [Source:MGI Symbol;Acc:MGI:1914085]	-	177	224	248	186	182	228	242	292	442	291	302	345	4.67551933692774	6.49136232285896	5.94438278273072	5.04683079913338	6.23456974165056	6.79462835936464	6.14573474491214	7.2166962767885	9.89013905790476	6.23992570450572	6.85772401661722
ENSMUSG00000107428	1.03548546667861	3.30389003742891	4.60147275516079	4.20982326369526	2.72250117770513	5.77313987989284	1.00375131991378	8.633873334522	16.4393883185597	15.940653340123	7.12637365873171	10.4388689139091	3.60771876342692	9.93048481429322	-1.46460798851325	0.0244047236917378	1	Gm44154	6	116607183	116609906	+	2724	TEC	predicted gene, 44154 [Source:MGI Symbol;Acc:MGI:5690546]	-	1	3	5	4	2	5	1	9	19	19	8	12	0.0147980340230629	0.0487030901150624	0.06713863719186	0.0608013500029806	0.0383806676742297	0.0834734368671462	0.0142267557747114	0.124607882577763	0.238166766204951	0.228237741491488	0.101767821467825
ENSMUSG00000041801	4075.670796847	5625.4234370623	5269.60659921013	3854.09319791301	5118.30221408564	4743.21172531995	6111.84178695498	5796.20696524244	5951.05857131863	5551.54227113653	5311.82076587715	5142.01284584304	4781.05132840634	5644.08053439546	-0.239434898618263	0.0244935049632555	0.40107219536261	Phlda3	1	135693857	135696874	+	1559	protein_coding	pleckstrin homology like domain, family A, member 3 [Source:MGI Symbol;Acc:MGI:1351485]	-	3936	5108	5726	3662	3760	4108	6089	6042	6878	6617	5963	5911	101.77007611023	144.892911450563	134.342940191283	97.2596178750052	126.075692649039	119.831146304457	151.36059919492	146.165445904135	150.643611387753	138.885204583355	132.539793046827
ENSMUSG00000071654	261.977823069688	310.565663518318	363.516347657702	250.484484189868	318.5326377915	308.285669586277	268.001602416978	374.13451116262	430.885020139092	490.804326524841	339.393545497098	402.766358928325	302.227104302226	384.330894111492	-0.347598767965663	0.0245604081520224	0.40107219536261	Uqcc3	19	8857378	8858287	-	821	protein_coding	ubiquinol-cytochrome c reductase complex assembly factor 3 [Source:MGI Symbol;Acc:MGI:2147553]	-	253	282	395	238	234	267	267	390	498	585	381	463	12.4219131592476	15.1896692356911	17.5980099502308	12.0031196172754	14.8991788466728	14.7895002243533	12.6032074165576	17.9156083550294	20.711943267444	23.3159799074522	16.080865241086
ENSMUSG00000007039	557.091181073091	583.687239945775	720.590633458179	586.217889469565	484.605209631513	654.674062379848	554.070728592404	809.665454926286	695.645695164318	771.024232609109	693.930635019	895.133009367702	597.811035992995	736.578292613136	-0.300326795576827	0.0247187457008509	0.402416765343837	Ddah2	17	35278011	35281071	+	1593	protein_coding	dimethylarginine dimethylaminohydrolase 2 [Source:MGI Symbol;Acc:MGI:1859016]	-	538	530	783	557	356	567	552	844	804	919	779	1029	13.6137454094206	14.7130414858585	17.9785890969769	14.4777060132333	11.6821789683233	16.1864897713499	13.4287714169072	19.9818999851923	17.2335574057025	18.8773356985881	16.9453005401317
ENSMUSG00000097209	14.4967965335005	4.40518671657188	8.28265095928942	18.9442046866287	6.80625294426282	26.556443447507	20.0750263982755	23.023662225392	15.574157354425	38.5931607181926	40.0858518303659	20.8777378278181	13.2485892146267	26.3715993924115	-0.993394419505648	0.0247404371726229	0.402416765343837	AU022754	15	85464453	85477909	+	3064	lncRNA	expressed sequence AU022754 [Source:MGI Symbol;Acc:MGI:2146143]	-	14	4	9	18	5	23	20	24	18	46	45	24	0.184183363414989	0.0577316002930505	0.107439349177261	0.243245087577198	0.0853042907511436	0.341369305913867	0.252961375524241	0.295415032325349	0.200594216032726	0.491258450595188	0.508922142441496
ENSMUSG00000086962	0	2.20259335828594	12.8841237144502	0	1.36125058885256	24.2471874955499	27.1012856376719	5.755915556348	39.8006243501973	70.4744673984387	28.5054946349268	1.73981148565151	6.7825258595231	28.896266510539	-2.08875094366948	0.0247756384884514	0.40259190865307	Gm12248	11	57954378	57983960	-	1462	protein_coding	predicted gene 12248 [Source:MGI Symbol;Acc:MGI:3651124]	-	0	2	14	0	1	21	27	6	46	84	32	2	0	0.0604957672017465	0.350259790417069	0	0.0357554510070457	0.653216755478554	0.715697287085138	0.154779695459109	1.07434835022482	1.88006505353576	0.758455665330655
ENSMUSG00000020374	55.9162152006448	69.3816907860072	48.7756112047044	114.717683935696	20.4187588327885	107.380401766007	81.3038569130158	176.514743728005	45.8572410991403	177.864132005583	141.636676467293	126.136332709734	69.4317269543079	124.885497153795	-0.845185337578165	0.0248059230193794	0.402686890236763	Rasgef1c	11	49792662	49871821	+	3563	protein_coding	RasGEF domain family, member 1C [Source:MGI Symbol;Acc:MGI:1921813]	-	54	63	53	109	15	93	81	184	53	212	159	145	0.610926638410458	0.78192859021668	0.54408865162297	1.26669194762033	0.220072141617882	1.18700492329093	0.881012714329333	1.94765536140256	0.507919292886556	1.94697781081047	1.54635390692037
ENSMUSG00000084758	0	0	0.920294551032158	1.05245581592382	2.72250117770513	0	0	9.59319259391334	2.59569289240417	2.51694526422995	11.580357195439	2.60971722847726	0.782541924110184	4.81598419574396	-2.68617695951899	0.0248112916429286	1	Gm12798	4	101260278	101265053	+	666	lncRNA	predicted gene 12798 [Source:MGI Symbol;Acc:MGI:3651483]	-	0	0	1	1	2	0	0	10	3	3	13	3	0	0	0.0549206149281161	0.0621707497778225	0.156980388505408	0	0	0.56628607297602	0.153808978459527	0.147396777577718	0.676389281872862
ENSMUSG00000054753	13.4613110668219	9.91167011228674	0	13.6819256070096	0	8.08239583184997	16.0600211186204	18.2270659284353	16.4393883185597	15.940653340123	26.7239012202439	20.8777378278181	7.52288376966137	19.0447946256334	-1.33207961613475	0.0248562461836918	0.402922106534262	AU018091	7	3204498	3219029	-	3653	protein_coding	expressed sequence AU018091 [Source:MGI Symbol;Acc:MGI:2142124]	-	13	9	0	13	0	7	16	19	19	19	30	24	0.143451404550973	0.108951999020063	0	0.147351314420035	0	0.087143251803052	0.169739645136879	0.196161619694458	0.177598212740839	0.170194253441778	0.284576593565242
ENSMUSG00000120401	5.17742733339304	4.40518671657188	0.920294551032158	0	2.72250117770513	3.4638839279357	11.0412645190515	5.755915556348	6.92184771307779	15.940653340123	1.78159341468293	9.56896317108331	2.78154895110632	8.50170628572776	-1.6259351461049	0.0248855759877786	1	ENSMUSG00000120401	15	76578998	76580181	-	1184	lncRNA	novel transcript, antisense to Ppp1r16aand KO:Ppp1r16aand Gpt	-	5	4	1	0	2	3	11	6	8	19	2	11	0.170227384623409	0.149400019677286	0.0308928458970653	0	0.0883014685342919	0.115227183459176	0.360042660501226	0.191121549629407	0.230713467689291	0.52510102012062	0.0585336878543823
ENSMUSG00000115049	319.96500920369	328.186410384605	307.378380044741	301.002363354211	238.218853049199	330.22360112987	258.967840537754	450.880051913927	383.297317111682	398.516333503076	353.646292814561	448.87136329809	304.162436194386	382.363199863182	-0.329343616780876	0.0249620492869008	0.403630702748051	Gm49172	15	95870620	95892010	-	935	lncRNA	predicted gene, 49172 [Source:MGI Symbol;Acc:MGI:6118604]	-	309	298	334	286	175	286	258	470	443	475	397	516	13.3216492040176	14.0944138349669	13.0660548310908	12.6652788606209	9.78399159374614	13.9104063357147	10.6935295662256	18.95816754684	16.1780725086424	16.6235189257437	14.7131780259768
ENSMUSG00000066682	14.4967965335005	27.5324169785743	36.8117820412863	15.7868372388572	29.9475129547564	35.7934672553356	63.2363331545678	47.0066437101753	41.5310862784667	52.855850548829	23.160714390878	36.5360411986817	26.7281355003851	44.0544448802664	-0.720568270535363	0.0250083480845582	0.403744400244884	Pilrb2	5	137864089	137870077	-	1957	protein_coding	paired immunoglobin-like type 2 receptor beta 2 [Source:MGI Symbol;Acc:MGI:2450535]	-	14	25	40	15	22	31	63	49	48	63	26	42	0.288368842873545	0.564925981406192	0.747616342199802	0.31736626994402	0.587653718033019	0.720371068248267	1.24756362391914	0.944311686535485	0.837500497938029	1.05339362861623	0.460373287406567
ENSMUSG00000007892	9757.37955251252	8862.13437706349	7759.00335975212	8717.49152329696	8569.0724568269	8897.56318289084	7758.99770293348	10798.0975837088	11082.7434196017	12007.5068738864	10682.4341144388	9772.52111490453	8760.44074205714	10350.3834682456	-0.240671078627902	0.0250180877981445	0.403744400244884	Rplp1	9	61820566	61821824	-	499	protein_coding	ribosomal protein, large, P1 [Source:MGI Symbol;Acc:MGI:1927099]	-	9423	8047	8431	8283	6295	7706	7730	11256	12809	14312	11992	11234	761.201736289684	713.141682704537	617.999557454226	687.301750286298	659.454478353975	702.285744871012	600.332600211073	850.733723631351	876.494796652415	938.513978183748	832.757721386479
ENSMUSG00000105302	3.10645640003582	3.30389003742891	0	2.10491163184763	5.44500235541026	0	9.03376187922398	10.5525118533047	8.65230964134723	10.9067628116631	1.78159341468293	4.34952871412878	2.3267100707871	7.54607805239178	-1.74094770288351	0.0252850328964463	1	Gm19817	3	55238262	55240393	+	2132	TEC	predicted gene, 19817 [Source:MGI Symbol;Acc:MGI:5012002]	-	3	3	0	2	4	0	9	11	10	13	2	5	0.056721169810727	0.0622266498468246	0	0.038842138228921	0.0980759275277689	0	0.163594345484439	0.194587794119246	0.160157566688626	0.199524906233252	0.0325065133300134
ENSMUSG00000026773	13100.9621244177	20550.1960328078	17032.8115505032	15011.1773025214	15084.0177750753	13689.2692832019	23384.3945000312	21183.6878858794	20671.2329641427	15073.1462057184	21875.2947421843	15699.1889407764	15744.7390114212	19647.8242064554	-0.31947244991508	0.0253995288756181	0.408300524179082	Pfkfb3	2	11476244	11558888	-	7561	protein_coding	6-phosphofructo-2-kinase/fructose-2,6-biphosphatase 3 [Source:MGI Symbol;Acc:MGI:2181202]	-	12652	18660	18508	14263	11081	11856	23297	22082	23891	17966	24557	18047	67.4514158016761	109.137692459296	89.53438878001	78.1073634595954	76.6106857709913	71.3090000756915	119.408087100664	110.146138821082	107.892126381642	77.7522777838122	112.544341939283
ENSMUSG00000006576	431.797439604979	378.846057625182	368.117820412863	352.572698334478	383.872666056423	387.954999928799	450.684342641285	412.507281538273	412.715169892263	467.312837392028	417.783655743146	555.869769665657	383.860280327121	452.812176145442	-0.23883322913902	0.0254743527921315	0.408667557902755	Slc4a3	1	75522910	75538816	+	8599	protein_coding	solute carrier family 4 (anion exchanger), member 3 [Source:MGI Symbol;Acc:MGI:109350]	-	417	344	400	335	282	336	449	430	477	557	469	639	1.95478604850207	1.76910194250727	1.70145968331784	1.61308477531457	1.71431566030804	1.77695619771536	2.02353803301673	1.885951919745	1.89410954355078	2.11957217520585	1.8899594563779
ENSMUSG00000098098	473.216858272124	511.001659122339	466.589337373304	569.378596414784	340.312647213141	525.355729070248	523.958188994991	683.035312686629	520.003809444969	548.69406760213	637.810442456488	628.941852063021	480.975804577657	590.407278874705	-0.294274507649685	0.025542903087767	0.408667557902755	Bvht	18	61747529	61780560	+	3219	lncRNA	braveheart long non-coding RNA [Source:MGI Symbol;Acc:MGI:5434104]	-	457	464	507	541	250	455	522	712	601	654	716	723	5.72277074191434	6.37440083956421	5.76098312452859	6.95883633720041	4.05983763376055	6.42799919986818	6.28438098329412	8.34197966811571	6.37511696925351	6.64810293350535	7.70760836850348
ENSMUSG00000026304	59.0226716006806	40.7479771282899	60.7394403681224	119.979963015315	4.08375176655769	75.0508184386069	84.3151108727571	141.019931130526	44.9920101350056	143.465880061107	185.285715127024	133.095578652341	59.9374370529287	122.029037663127	-1.02223685524146	0.0255938138808832	0.408667557902755	Rab17	1	90885855	90897383	-	1992	protein_coding	RAB17, member RAS oncogene family [Source:MGI Symbol;Acc:MGI:104640]	-	57	37	66	114	3	65	84	147	52	171	208	153	1.15344435074946	0.821400108185561	1.21189284627524	2.36960442074869	0.078726610500453	1.48391633852379	1.63419144043492	2.78315959420172	0.891350826976297	2.80897413172958	3.61827519459699
ENSMUSG00000067288	1136.96304241311	923.987913800953	808.938910357267	898.797266798938	883.451632165315	1020.69113076505	810.027315170417	1007.2852223609	1129.12640819581	1542.88744697296	1362.0281655251	1329.21597503775	945.471649383439	1196.76175554382	-0.340430351489235	0.025668127238286	0.408887324915698	Rps28	17	34038001	34043536	-	1719	protein_coding	ribosomal protein S28 [Source:MGI Symbol;Acc:MGI:1859516]	-	1098	839	879	854	649	884	807	1050	1305	1839	1529	1528	25.7476494807144	21.583826926548	18.7034885791321	20.5703806437658	19.7359689485883	23.3863143165885	18.1932646674597	23.0368732304904	25.9220472073936	35.0063488192693	30.8218854960881
ENSMUSG00000085457	17.6032529335363	37.444087090861	21.1667746737396	14.7343814229334	42.1987682544295	32.3295833273999	54.2025712753439	35.4948125974793	36.3397004936584	59.5677045867755	32.9594781716341	45.2350986269393	27.57947461715	43.9665609586384	-0.686761019124233	0.0257090668744149	0.408887324915698	1110046J04Rik	13	34119550	34144174	+	3497	lncRNA	RIKEN cDNA 1110046J04 gene [Source:MGI Symbol;Acc:MGI:1916058]	-	17	34	23	14	31	28	54	37	42	71	37	52	0.195958638701743	0.429957620255135	0.240570197160104	0.165764961660971	0.463399642705555	0.364122732441005	0.598426899467241	0.399039788683874	0.410098631729092	0.66436031117529	0.366634800904315
ENSMUSG00000028159	212.274520669115	166.295798550589	159.210957328563	256.799219085411	132.041307118699	232.080223171692	194.727756063272	335.761740786967	205.924969464064	302.033431707594	275.256182568512	247.92313670534	193.117004320678	260.271202882625	-0.429358568462275	0.0257441068250658	0.408887324915698	Dapp1	3	137636768	137687306	-	4124	protein_coding	dual adaptor for phosphotyrosine and 3-phosphoinositides 1 [Source:MGI Symbol;Acc:MGI:1347063]	-	205	151	173	244	97	201	194	350	238	360	309	285	2.00376289019369	1.61920060123569	1.53439461949265	2.44980492771466	1.22954013800029	2.21647478405661	1.82303939129022	3.20080707106475	1.97057497232968	2.85643803686014	2.59637498831873
ENSMUSG00000067787	1706.48004908634	2222.41669851052	2221.59104619163	1893.36801284694	2288.26223986116	1909.75467226855	2770.35364296202	2460.65390033877	2606.07566397379	1979.15795943949	2067.53915773954	2871.55885706782	2040.31211979419	2459.22319692024	-0.269468214974068	0.0257749738639989	0.408887324915698	Blcap	2	157398282	157413194	-	3043	protein_coding	bladder cancer associated protein [Source:MGI Symbol;Acc:MGI:1858907]	-	1648	2018	2414	1799	1681	1654	2760	2565	3012	2359	2321	3301	21.8306355671051	29.3265905204712	29.016493826714	24.478767372429	28.8772208395786	24.7183198101334	35.1495775010404	31.7903659416433	33.7977412989357	25.3668740137679	26.4302202398727
ENSMUSG00000035208	125.293741468112	210.347665716307	202.464801227075	109.455404856077	223.245096571821	167.421056516892	304.136649933874	238.870495588442	205.924969464064	230.719982554412	183.504121712341	239.224079277083	173.037961059381	233.730049755036	-0.434918312046929	0.0257765182964375	0.408887324915698	Slfn8	11	82892984	82911636	-	4091	protein_coding	schlafen 8 [Source:MGI Symbol;Acc:MGI:2672859]	-	121	191	220	104	164	145	303	249	238	275	206	275	1.19224913374178	2.06464911084699	1.96699303330911	1.05260200748255	2.09557882597344	1.61184737686558	2.8702923166182	2.29551416831839	1.98647059053718	2.19960236399894	1.74487907631817
ENSMUSG00000041560	1713.7284473531	1535.2075707253	2051.33655425068	1823.90592899597	1674.33822428865	1903.98153238866	1908.13125915609	2336.90171587729	1744.3056236956	2119.26791248162	2179.77954286456	2239.13738203349	1783.74970966706	2087.92057268478	-0.226809650729064	0.0259106250252794	0.409328253635215	Nop53	7	15670108	15679999	-	3847	protein_coding	NOP53 ribosome biogenesis factor [Source:MGI Symbol;Acc:MGI:2154441]	-	1655	1394	2229	1733	1230	1649	1901	2436	2016	2526	2447	2574	17.3415110328704	16.0244433894776	21.1932471404724	18.6524854788322	16.7136982916376	19.4932325292981	19.1501821862039	23.8816983085662	17.8938175013045	21.48582941404	22.0414101986916
ENSMUSG00000060260	209.168064269079	241.183972732311	249.399823329715	201.019060841449	156.543817718045	177.812708300699	238.892814139479	229.277302994529	295.043758769941	249.177581158765	316.23283110622	228.785210363174	205.854574531883	259.568249755351	-0.331186258867384	0.0259598661866705	0.409713328695182	Pwwp2b	7	138828398	138849819	+	5963	protein_coding	PWWP domain containing 2B [Source:MGI Symbol;Acc:MGI:2142008]	-	202	219	271	191	115	154	238	239	341	297	355	263	1.36551880347515	1.62413330128466	1.6623179785202	1.32626067352636	1.00814421898618	1.17446831702232	1.54676781650422	1.51162199194843	1.95264921806861	1.62979358256067	2.06296156959198
ENSMUSG00000038457	147.038936268362	125.547821422299	137.123888103792	88.4062885376005	119.790051819026	138.555357117428	185.693994184048	154.450400762005	178.237578611753	147.660788834824	146.981456711341	144.404353309075	126.077057211418	159.571428735508	-0.33790736802359	0.0261026194304839	0.410832138230683	Tmem255b	8	13485189	13518473	+	1581	protein_coding	transmembrane protein 255B [Source:MGI Symbol;Acc:MGI:2685533]	-	142	114	149	84	88	120	185	161	206	176	165	166	3.62049205843954	3.18871237444045	3.44718045653174	2.19992436784978	2.90964788410024	3.45171373094659	4.53474465851236	3.84064455793338	4.449077927205	3.64268620715787	3.61642671069959
ENSMUSG00000108049	20.7097093335721	26.4311202994313	11.963829163418	14.7343814229334	25.8637611881987	30.0203273754427	31.116290917327	27.8202585223487	16.4393883185597	31.0423249255027	65.9189563432683	59.1535905121513	21.6205214638327	38.5818015898596	-0.845045569932549	0.0261235666583225	0.410832138230683	Gm44168	6	87963173	87966711	+	3539	TEC	predicted gene, 44168 [Source:MGI Symbol;Acc:MGI:5690560]	-	20	24	13	14	19	26	31	29	19	37	74	68	0.227803586769276	0.299897637690715	0.13436074711716	0.163797703003226	0.280648465123966	0.334101310691086	0.339464301960929	0.30904914420624	0.183319093286885	0.342107129421694	0.724567334706069
ENSMUSG00000037361	449.400692538516	390.960321095755	388.364300535571	477.814940429412	389.317668411834	383.336488024884	500.871908636974	410.588643019491	483.66410895131	536.948323035723	497.955359403878	473.228724097211	413.199068505995	483.876177857431	-0.227423004932214	0.0263356250187514	0.41366262481789	Sf3b6	12	4867544	4877659	+	2854	protein_coding	splicing factor 3B, subunit 6 [Source:MGI Symbol;Acc:MGI:1913305]	-	434	355	422	454	286	332	499	428	559	640	559	544	6.12980819572857	5.50068467683575	5.40839126376205	6.58661408052611	5.23843666449826	5.29016854608741	6.77578405130573	5.65587640258124	6.68794204935894	7.33781855579613	6.78711851936756
ENSMUSG00000102684	0	0	0	0	0	1.15462797597857	5.01875659956888	0	0	3.35592701897327	6.23557695139024	4.34952871412878	0.192437995996428	3.15996488067686	-3.48871783671229	0.0263608130564816	1	Gm37374	9	87620236	87622073	-	1838	TEC	predicted gene, 37374 [Source:MGI Symbol;Acc:MGI:5610602]	-	0	0	0	0	0	1	5	0	0	4	7	5	0	0	0	0	0	0.0247422896655176	0.105423511235892	0	0	0.0712123713215525	0.131971492093885
ENSMUSG00000035929	2507.94580029559	2713.59501740828	2537.25207719566	1715.50297995582	2173.91719039755	2442.03816919467	2940.99136734736	3096.68256931522	2500.51748634935	3269.51189823471	2476.41484640927	2729.76422098722	2348.37520574126	2835.64706477386	-0.27188168879923	0.0265025862955404	0.414995879912656	H2-Q4	17	35598593	35604266	+	2596	protein_coding	histocompatibility 2, Q region locus 4 [Source:MGI Symbol;Acc:MGI:95933]	-	2422	2464	2757	1630	1597	2115	2930	3228	2890	3897	2780	3138	37.6080292034323	41.9738089181474	38.8455878842988	25.9981982063977	32.1580614744085	37.0502444441614	43.7397112480043	46.8963398079873	38.0126211094236	49.1209413609096	37.1080131445409
ENSMUSG00000033955	2591.82012309655	3331.42245440749	3329.62568563435	2718.49337253121	2747.00368830448	3170.60842203715	3024.3027269002	3698.17574495359	3313.83459263599	3557.28264011167	3423.33174631324	3658.82355432513	2981.4956243352	3445.9585008733	-0.208769536950116	0.0265274319715075	0.414995879912656	Tnks1bp1	2	84878366	84903392	+	6425	protein_coding	tankyrase 1 binding protein 1 [Source:MGI Symbol;Acc:MGI:2446193]	-	2503	3025	3618	2583	2018	2746	3013	3855	3830	4240	3843	4206	15.703586183828	20.8206657772828	20.5970513125929	16.6460658500067	16.4186582402028	19.436264249142	18.1735168974997	22.6287914761218	20.3544937003888	21.5940293849579	20.7264463432279
ENSMUSG00000097649	5.17742733339304	9.91167011228674	7.36235640825726	15.7868372388572	8.16750353311539	8.08239583184997	10.0375131991378	21.1050237066093	29.4178527805806	11.7457445664064	33.8502748789756	7.8291516854318	9.08136507629327	18.9975934695236	-1.0658599526468	0.0265464379090817	0.414995879912656	Gm10561	1	55265410	55274783	+	1945	lncRNA	predicted gene 10561 [Source:MGI Symbol;Acc:MGI:3648163]	-	5	9	8	15	6	7	10	22	34	14	38	9	0.103624279380009	0.204628098930741	0.150445777037019	0.319324313768867	0.161258003205041	0.163668019967377	0.199247726119865	0.426592469986871	0.59688954725579	0.235531714504652	0.677004546001122
ENSMUSG00000022969	511.529820539232	596.90280009549	534.691134149684	509.388614907127	491.411462575776	603.870431436791	721.697199018004	606.289771935323	695.645695164318	614.134644472108	509.535716599317	704.623651688862	541.299043950683	641.987779812989	-0.245736603938932	0.0267050859020408	0.416291107292267	Il10rb	16	91203052	91222722	+	3808	protein_coding	interleukin 10 receptor, beta [Source:MGI Symbol;Acc:MGI:109380]	-	494	542	581	484	361	523	719	632	804	732	572	810	5.22927081705324	6.29426049287457	5.58070174999339	5.26270172436513	4.95564166055688	6.24582976783895	7.31720007434233	6.25936458898326	7.20931117313133	6.29006458600039	5.2050713014712
ENSMUSG00000024376	260.942337603009	175.106171983732	230.073637758039	189.442046866287	156.543817718045	148.947008901235	171.641475705256	309.860120783401	211.981586213007	268.474161517862	321.577611350268	274.020308990113	193.509170138391	259.592544093318	-0.421533877367782	0.0268164192894036	0.417237148849389	Epb41l4a	18	33929380	34140019	-	9071	protein_coding	erythrocyte membrane protein band 4.1 like 4a [Source:MGI Symbol;Acc:MGI:103007]	-	252	159	250	180	115	129	171	323	245	320	361	315	1.11984134704702	0.775147450787322	1.00807875488164	0.821632618604935	0.662723401809568	0.646725428759072	0.730556691311173	1.34294264630642	0.922243450381843	1.15434539511863	1.37904878169284
ENSMUSG00000097375	140.826023468291	166.295798550589	120.558586185213	201.019060841449	103.455044752795	174.348824372764	200.750263982755	205.294321509745	167.854807042136	191.287840081476	195.08447890778	206.167661049704	151.083889695183	194.4065620956	-0.3616054992766	0.0270715626075952	0.418441029160738	6720427I07Rik	13	48686381	48699976	-	5598	lncRNA	RIKEN cDNA 6720427I07 gene [Source:MGI Symbol;Acc:MGI:1924398]	-	136	151	131	191	76	151	200	214	194	228	219	237	0.979303121886383	1.1928516040543	0.855949262239803	1.41273533337579	0.709692688870108	1.22667481050168	1.38455458129024	1.44175341666371	1.1833235234539	1.33273227829113	1.35562264432743
ENSMUSG00000087259	44.5258750671801	100.21799780201	79.1453313887656	131.556976990477	63.9787776760705	137.400729141449	108.405142550688	116.077630386351	127.188951727804	122.491336192524	223.589973542707	149.62378776603	92.8042813443255	141.229470361017	-0.60597820024541	0.027123794384287	0.418855445238891	2610035D17Rik	11	112934701	113092720	-	7307	lncRNA	RIKEN cDNA 2610035D17 gene [Source:MGI Symbol;Acc:MGI:1919636]	-	43	91	86	125	47	119	108	121	147	146	251	172	0.23721408528663	0.550737502398711	0.430495845165291	0.708322830026512	0.336239230942677	0.740616269361069	0.57279290199451	0.624534411890592	0.686930642267444	0.653814746797454	1.19031582669473
ENSMUSG00000120029	0	0	0	0	0	0	7.02625923939643	0.959319259391334	0	3.35592701897327	1.78159341468293	1.73981148565151	0	2.47715173634924	-3.61305288208036	0.0271755715712721	1	ENSMUSG00000120029	18	35087715	35089429	+	1715	lncRNA	novel transcript	-	0	0	0	0	0	0	7	1	0	4	2	2	0	0	0	0	0	0	0.158178296858423	0.0219910509972029	0	0.076319730897384	0.040410429399177
ENSMUSG00000060470	85.9452937343244	128.851711459728	111.355640674891	108.402949040153	93.926290630827	132.782217237535	167.6264704256	133.345377055395	160.067728364924	92.2879930217649	143.418269881976	190.50935767884	110.210683796243	147.875866071417	-0.422995853700189	0.0271798027838234	0.418935089306883	Adgrg3	8	95744320	95771878	+	6905	protein_coding	adhesion G protein-coupled receptor G3 [Source:MGI Symbol;Acc:MGI:1859670]	-	83	117	121	103	69	115	167	139	185	110	161	219	0.484535424814241	0.74931520368773	0.640960561129206	0.617637812202617	0.522366167514664	0.757389973439601	0.937272268785285	0.759208789568169	0.914834865363184	0.521278683337852	0.807959863399983
ENSMUSG00000024397	42.4549041338229	62.7739107111493	83.7468041439263	65.2522605872766	49.0050211986923	64.6591666547998	71.266343713878	105.525118533047	89.1187893058765	98.1608653049682	71.2637365873171	72.2021766545377	61.3153445716112	84.589505016604	-0.458788873131449	0.0272978956690466	0.419577823637016	Aif1	17	35389967	35395044	-	1532	protein_coding	allograft inflammatory factor 1 [Source:MGI Symbol;Acc:MGI:1343098]	-	41	57	91	62	36	56	71	110	103	117	80	83	1.07878827143065	1.64535060835194	2.1726623944735	1.67568838108737	1.22838178681647	1.66232009836318	1.79602576622211	2.70797112964904	2.29568936126342	2.49901037911465	1.8095009509031
ENSMUSG00000020491	88.0162646676816	64.9765040694353	60.7394403681224	75.7768187465147	74.8687823868911	79.6693303425211	95.3563753918086	106.484437792438	97.7710989472237	70.4744673984387	104.223214758951	101.778971910613	74.0078567635277	96.0147610332456	-0.376349082056588	0.0273928030738258	0.420114551925587	2810021J22Rik	11	58758042	58774114	+	3928	protein_coding	RIKEN cDNA 2810021J22 gene [Source:MGI Symbol;Acc:MGI:1917194]	zf-C2H2	85	59	66	72	55	69	95	111	113	84	117	117	0.872285335463336	0.664236747363576	0.614585170514326	0.758964305841687	0.731949036526615	0.798845891028581	0.937270839964309	1.06576538265848	0.982294305915403	0.699759447115398	1.03214800293939
ENSMUSG00000019470	818.0335186761	751.084335175506	826.424506826878	728.29942461928	720.101561503007	827.868258776633	959.586261837569	903.678742346636	768.325096151634	818.846192629478	932.664152586512	1003.0013214781	778.635267596234	897.683627838321	-0.204283866591645	0.0274581420899468	0.420114551925587	Xab2	8	3658421	3671316	-	4685	protein_coding	XPA binding protein 2 [Source:MGI Symbol;Acc:MGI:1914689]	-	790	682	898	692	529	717	956	942	888	976	1047	1153	6.79717765128505	6.43749856398999	7.01094179910962	6.11585011560397	5.90249611482329	6.95977107076705	7.90790196161792	7.58318092156055	6.47199290877212	6.81680994478533	7.74398816235958
ENSMUSG00000036775	605.758998006985	573.775569833488	572.423210742002	551.486847544079	692.876549725955	548.448288589819	649.427103984213	684.953951205412	645.462299244504	729.914126626686	618.212914894976	754.20827902993	590.794910740388	680.36311249762	-0.20541747207371	0.027460300565871	0.420114551925587	Decr2	17	26300182	26309311	-	2653	protein_coding	2-4-dienoyl-Coenzyme A reductase 2, peroxisomal [Source:MGI Symbol;Acc:MGI:1347059]	-	585	521	622	524	509	475	647	714	746	870	694	867	8.88852587150835	8.68446039749429	8.57556523754314	8.1781368037933	10.0292894498685	8.14219977100645	9.45104889804485	10.1501175486562	9.60143706771174	10.7305743013043	9.06462442050405
ENSMUSG00000120984	94.2291774677533	126.649118101442	143.565949961017	101.035758328686	123.873803585583	96.9887499821996	157.588957226463	199.538405953397	175.641885719349	102.355774078685	119.366758783756	168.761714108196	114.39042623778	153.875582644974	-0.426098246105399	0.0275823014173095	0.420967686127799	ENSMUSG00000120984	11	100860694	100863199	+	2506	lncRNA	novel transcript, antisense to Cavin1	-	91	115	156	96	91	84	157	208	203	122	134	194	1.46376530956621	2.02936020343768	2.27694820773007	1.58617280837784	1.89823492134053	1.52434620352697	2.42790430513139	3.13034625368005	2.76598380816323	1.5930144947785	1.85289720275835
ENSMUSG00000079334	460.79103267198	588.092426662346	432.538438985114	500.968968379736	549.945237896436	555.376056445691	684.558400181195	635.069349717063	552.017355117953	701.388746965413	587.035030138024	521.943445695453	514.618693506884	613.668721302517	-0.255084557407489	0.0276701342310164	0.421544962635522	Naa80	9	107456086	107461249	+	3154	protein_coding	N(alpha)-acetyltransferase 80, NatH catalytic subunit [Source:MGI Symbol;Acc:MGI:1888902]	-	445	534	470	476	404	481	682	662	638	836	659	600	5.68734333610538	7.4872430913984	5.45061854305609	6.24892910956442	6.69590539835432	6.93535636110064	8.37983881486175	7.91601139145667	6.90706673211592	8.67332363481415	7.24021261105087
ENSMUSG00000074489	210.203549735757	95.8128110854385	170.254491940949	422.03478218545	5.44500235541026	123.545193429707	779.914775573003	336.721060046358	173.911423791079	630.075297812231	441.835166841366	514.984199752847	171.215971788785	479.573653969481	-1.48514917778638	0.0276817169127654	0.421544962635522	Bglap3	3	88275923	88280050	-	2629	protein_coding	bone gamma-carboxyglutamate protein 3 [Source:MGI Symbol;Acc:MGI:88155]	-	203	87	185	401	4	107	777	351	201	751	496	592	3.11255171920926	1.46342689491422	2.57389462354248	6.31559279580218	0.0795351378810206	1.85088137670547	11.453636927141	5.03531495379659	2.61059879681287	9.34738895067033	6.53760510918903
ENSMUSG00000109907	0	3.30389003742891	0	1.05245581592382	2.72250117770513	2.30925595195713	6.02250791948265	4.79659629695667	7.78707867721251	2.51694526422995	5.34478024404878	5.21943445695453	1.5646838305025	5.28122380981418	-1.8152157852299	0.0277136456229164	1	Gm45321	8	50271972	50402041	+	3321	lncRNA	predicted gene 45321 [Source:MGI Symbol;Acc:MGI:5791157]	-	0	3	0	1	2	2	6	5	9	3	6	6	0	0.0399479727411714	0	0.0124678468389129	0.0314811619224937	0.0273871294219941	0.0700156869563031	0.0567820723580291	0.0925354829756506	0.0295592453678892	0.0626051367837295
ENSMUSG00000022914	771.436672675563	673.993567635498	626.720589252899	695.673294325642	717.379060325302	599.251919532876	814.042320450072	721.408083062283	731.120164693841	752.566634004756	859.618822584512	815.971586770558	680.742517291297	782.45460192767	-0.201191331085692	0.0278107335951907	0.422035483506212	Brwd1	16	95793292	95883726	-	20280	protein_coding	bromodomain and WD repeat domain containing 1 [Source:MGI Symbol;Acc:MGI:1890651]	-	745	612	681	661	527	519	811	752	845	897	965	938	1.48081036911851	1.33452230594575	1.22825568137019	1.34956511300255	1.35841446544391	1.16381728019279	1.54976512299233	1.39849204388918	1.42273305075063	1.44732297367659	1.64887205115639
ENSMUSG00000048078	5784.2218168667	6319.24034492237	5980.07399260696	6722.03529630541	4139.56304070065	6442.8241059604	7833.2753006071	6545.43530682707	7151.13391857349	9186.85021443933	7739.24179338263	5484.75570851639	5897.99309956042	7323.44870705767	-0.312193866344606	0.0278234718292451	0.422035483506212	Tenm4	7	95820453	96560300	+	21021	protein_coding	teneurin transmembrane protein 4 [Source:MGI Symbol;Acc:MGI:2447063]	-	5586	5738	6498	6387	3041	5580	7804	6823	8265	10950	8688	6305	10.7117069775894	12.0711747595665	11.3067022389387	12.580673112669	7.56227873845996	12.071638480621	14.3872194485214	12.2414287491539	13.4253045976354	17.0451846540923	14.3216822514006
ENSMUSG00000029499	141.861508934969	319.376036951462	284.371016268937	236.802558582858	387.956417822981	357.934672553356	444.661834721802	397.158173388012	401.467167358512	333.91473838784	303.761677203439	505.415236581764	288.050368519094	397.729804606895	-0.467180318258297	0.0279134141160824	0.422267085614829	Pxmp2	5	110422148	110434052	-	1200	protein_coding	peroxisomal membrane protein 2 [Source:MGI Symbol;Acc:MGI:107487]	-	137	290	309	225	285	310	443	414	464	398	341	581	4.60204060083233	10.6870814075819	9.41861085709727	7.76357237850558	12.4151864759214	11.7480515046822	14.3065678746075	13.01155509877	13.2029627109658	10.8528247330474	9.84692719544988
ENSMUSG00000091655	4.14194186671443	3.30389003742891	10.1232400613537	2.10491163184763	4.08375176655769	4.61851190391427	3.01125395974133	6.71523481573934	12.9784644620208	17.6186168496097	24.0515110982195	7.8291516854318	4.72937454463611	12.0340388117937	-1.33537102516986	0.0279631035448221	1	Gm8741	17	35554885	35555268	+	384	processed_pseudogene	predicted gene 8741 [Source:MGI Symbol;Acc:MGI:3644779]	-	4	3	11	2	3	4	3	7	15	21	27	9	0.41989421540441	0.345487545503724	1.04778235667547	0.215654788291822	0.4083942919711	0.473711754221055	0.302763146330576	0.687506685472449	1.33381223507871	1.78948900277948	2.43646475693866
ENSMUSG00000018733	153.251849068434	190.524325491734	192.341561165721	215.753442264382	247.747607171167	214.760803532013	305.140401253788	252.300965219921	233.612360316375	234.914891328129	227.153160372073	240.093985019908	202.396598115575	248.869293918366	-0.300507158036297	0.027993275454864	0.422524253014259	Pex12	11	83185468	83193412	-	3536	protein_coding	peroxisomal biogenesis factor 12 [Source:MGI Symbol;Acc:MGI:2144177]	-	148	173	209	205	182	186	304	263	270	280	255	276	1.68717675691908	2.16359621256631	2.1619400662625	2.40050126333883	2.69059768828019	2.3921371842113	3.33176457862426	2.8051339358126	2.60727097535749	2.59111529814224	2.49893821224478
ENSMUSG00000032827	413.158701204764	502.191285689195	405.849897005182	515.70334980267	488.688961398071	482.634493959041	546.040718033094	476.781671917493	485.39457087958	583.092319546606	580.799453186634	681.136196632566	468.03778150982	558.874155032662	-0.257277907979843	0.0281153913617247	0.422524253014259	Ppp1r9a	6	4902917	5165661	+	14531	protein_coding	protein phosphatase 1, regulatory subunit 9A [Source:MGI Symbol;Acc:MGI:2442401]	-	399	456	441	490	359	418	544	497	561	695	652	783	1.10684935839588	1.38775150065112	1.11007598431473	1.39624268684155	1.29148265808657	1.30817598743256	1.45082949592531	1.28994441351048	1.31826287215652	1.56505738163004	1.5548184552189
ENSMUSG00000041261	136.684081601576	68.2803941068642	70.8626804294761	147.343814229334	133.402557707551	78.5147023665426	84.3151108727571	223.521387438181	118.536642086457	190.448858326733	171.923764516902	166.151996879719	105.848038406891	159.149626686792	-0.590425243437478	0.0281778630432053	0.422524253014259	Car8	4	8143362	8239041	-	3853	protein_coding	carbonic anhydrase 8 [Source:MGI Symbol;Acc:MGI:88253]	-	132	62	77	140	98	68	84	233	137	227	193	191	1.38097573257324	0.711598536495602	0.730973001490696	1.50449019187235	1.32958681507539	0.80259287089412	0.844876550570038	2.28069401070005	1.21410492366158	1.92782590429575	1.73574488437329
ENSMUSG00000120564	2.07097093335722	0	0	0	1.36125058885256	0	3.01125395974133	8.633873334522	1.73046192826945	0	5.34478024404878	5.21943445695453	0.572036920368297	3.98996732058935	-2.85590729579552	0.0282519774562385	1	ENSMUSG00000120564	7	128124277	128125186	-	910	lncRNA	novel transcript	-	2	0	0	0	1	0	3	9	2	0	6	6	0.0885930652281832	0	0	0	0.0574444718376932	0	0.127759393616419	0.37300205729871	0.0750452598198134	0	0.228474350833809
ENSMUSG00000039481	109.761459467932	48.4570538822907	34.0508983881898	105.245581592382	35.3925153101667	84.2878422464354	97.3638780316362	169.799508912266	25.9569289240417	177.02515025084	158.56181390678	138.315013109295	69.5325584812328	127.83704885581	-0.877352979118334	0.0282688865834426	0.422524253014259	Nrtn	17	57058325	57064530	-	1023	protein_coding	neurturin [Source:MGI Symbol;Acc:MGI:108417]	-	106	44	37	100	26	73	97	177	30	211	178	159	4.17677765000515	1.90203896019255	1.32292648392829	4.04747989755912	1.32857888922759	3.24513389401872	3.67459161763483	6.525409076692	1.00133704451657	6.74912986832401	6.02937037276968
ENSMUSG00000026961	33.1355349337154	58.3687239945775	30.3697201840612	35.7834977414097	2.72250117770513	15.0101636877214	25.0937829978444	67.1523481573933	66.6227842383737	45.3050147561391	108.677198295659	45.2350986269393	29.2316902865317	59.6810378453914	-1.02320052800681	0.028280259499359	0.422524253014259	Lrrc26	2	25179927	25181192	+	1190	protein_coding	leucine rich repeat containing 26 [Source:MGI Symbol;Acc:MGI:2385129]	-	32	53	33	34	2	13	25	70	77	54	122	52	1.08396220985071	1.96956933503972	1.01432376041188	1.18302055291514	0.0878562510458837	0.496800226275526	0.814152998536003	2.21850896824723	2.20942073763627	1.48486770554763	3.55255216100412
ENSMUSG00000047867	679.278466141167	760.996005287793	748.199469989144	548.329480096308	677.902793248577	609.643571316683	803.00105593102	839.404351967417	744.963860119997	727.397181362456	766.975965021	798.573471914043	670.724964346612	780.052647719322	-0.217187541745164	0.0283352176923818	0.422593344737699	Gimap6	6	48678516	48685159	-	3496	protein_coding	GTPase, IMAP family member 6 [Source:MGI Symbol;Acc:MGI:1918876]	-	656	691	813	521	498	528	800	875	861	867	861	918	7.56386101524832	8.74075584230932	8.50606588036267	6.17058918261085	7.44642040829686	6.86827843190985	8.86811961792077	9.43945105911829	8.40942670500886	8.11500210740666	8.53413132254945
ENSMUSG00000063698	85.9452937343244	122.24393138487	115.957113430052	141.029079333791	137.486309474109	111.998913669921	163.611465145945	187.06725558131	123.728027871265	116.618463909321	157.671017199439	184.42001747906	119.110106837845	155.519374531057	-0.385731724396363	0.0284776452393415	0.423107448700298	Sfxn4	19	60825715	60849917	-	2975	protein_coding	sideroflexin 4 [Source:MGI Symbol;Acc:MGI:2137680]	-	83	111	126	134	101	97	163	195	143	139	177	212	1.12461079272011	1.64997883916535	1.54914901590178	1.86499710694857	1.77469627112685	1.48275759842234	2.1233110201819	2.47205285033263	1.6412839765298	1.52886378571201	2.06164502458272
ENSMUSG00000102331	0	1.10129667914297	1.84058910206432	0	2.72250117770513	4.61851190391427	6.02250791948265	10.5525118533047	3.46092385653889	12.5847263211498	3.56318682936585	1.73981148565151	1.71381647713778	6.32061137758222	-1.91716020673222	0.0285819608895186	1	Gm19938	1	3717532	3729127	-	3259	lncRNA	predicted gene, 19938 [Source:MGI Symbol;Acc:MGI:5012123]	-	0	1	2	0	2	4	6	11	4	15	4	2	0	0.0135693175282224	0.0224468423087606	0	0.0320800671201601	0.0558162975209834	0.0713476822282548	0.127297077957113	0.0419092890064622	0.150607937813379	0.0425307679776549
ENSMUSG00000001520	119.08082866804	188.321732133448	188.660382961592	117.875051383467	123.873803585583	257.48203864322	394.474268726114	207.212960028528	314.078839980905	183.737004288787	188.84890195639	178.33067727928	165.882306229225	244.44710871	-0.558194441583901	0.0286122160942288	0.423959968151625	Nrip2	6	128376259	128393390	+	3757	protein_coding	nuclear receptor interacting protein 2 [Source:MGI Symbol;Acc:MGI:1891884]	-	115	171	205	112	91	223	393	216	363	219	212	205	1.23386535482158	2.01278450784815	1.99582420977793	1.23434670413291	1.26616361801421	2.69928699344273	4.05381882166976	2.1683164576534	3.29913503809941	1.90740924468286	1.95533988833548
ENSMUSG00000030103	625.433221873879	835.884179469515	653.409131232832	816.705713156881	1314.96806883158	630.426874884298	1832.84991016255	1289.32508462195	810.721413394236	757.600524533216	1542.85989711541	826.410455684467	812.80453157483	1176.62788091864	-0.534115153491872	0.0288786958657728	0.424852028375302	Bhlhe40	6	108637590	108643886	+	4705	protein_coding	basic helix-loop-helix family, member e40 [Source:MGI Symbol;Acc:MGI:1097714]	bHLH	604	759	710	776	966	546	1826	1344	937	903	1732	950	5.17473882805724	7.1338588779549	5.51960934642061	6.8290835743199	10.7326540730377	5.27738051206181	15.0402177822642	10.7733247410229	6.80008944639323	6.28013653855362	12.7560394557627
ENSMUSG00000059689	316.858552803654	312.768256876604	275.168070758615	286.267981931278	352.563902512814	333.687485057806	363.357977808787	361.663360790533	367.723159757257	382.575680162953	388.387364400878	318.385501874226	312.885708323462	363.682174132439	-0.220172143657151	0.0289630714920124	0.425333804789562	Zfp637	6	117818141	117822917	+	2565	protein_coding	zinc finger protein 637 [Source:MGI Symbol;Acc:MGI:2448537]	zf-C2H2	306	284	299	272	259	289	362	377	425	456	436	366	4.80889375115787	4.89635994313894	4.2637667575421	4.390781935186	5.27839671244675	5.12384362928224	5.46933066213395	5.54324521539825	5.6576518977218	5.8172594884006	5.8901548691892
ENSMUSG00000026475	25.8871366669652	35.2414937325751	16.5653019185788	9.47210234331434	65.3400282649231	32.3295833273999	64.2400844744816	52.7625592665233	28.5526218164459	84.7371572290751	49.884615611122	49.584627341068	30.8059410422927	54.9602776231193	-0.849514781285991	0.029036776596118	0.426036480831912	Rgs16	1	153616095	153621214	+	2339	protein_coding	regulator of G-protein signaling 16 [Source:MGI Symbol;Acc:MGI:108407]	-	25	32	18	9	48	28	64	55	33	101	56	57	0.430844855481224	0.605009399907334	0.281482826745727	0.159320852573009	1.07275525005149	0.544393841533217	1.06038293917917	0.886834495643934	0.481746291660751	1.41296731374416	0.829631816908286
ENSMUSG00000069743	105.619517601218	69.3816907860072	57.0582621639938	75.7768187465147	62.617527087218	60.0406547508855	95.3563753918086	88.2573718640027	86.5230964134723	76.3473396816419	120.257555491098	120.91689825278	71.7490785226395	97.9431061824672	-0.447110566671206	0.0290734742740754	0.426042517580466	Zfp820	17	22035866	22064753	-	3718	protein_coding	zinc finger protein 820 [Source:MGI Symbol;Acc:MGI:1922674]	zf-C2H2	102	63	62	72	46	52	95	92	100	91	135	139	1.10586448554061	0.749330706547077	0.609946754064489	0.801832112250173	0.646752445165637	0.63603256510799	0.990209752388329	0.933229700467635	0.918386046745967	0.800890183062146	1.25820665231905
ENSMUSG00000038213	322.035980137047	443.822561694617	369.038114963895	367.307079757412	363.453907223635	452.614166583598	426.594310963354	497.886695624102	509.621037875352	391.804479465129	467.668271354268	469.749101125908	386.378635060034	460.553982734686	-0.253799492659323	0.0292879488993618	0.427438028356762	Tapbpl	6	125200896	125208823	-	2352	protein_coding	TAP binding protein-like [Source:MGI Symbol;Acc:MGI:2384853]	-	311	403	401	349	267	392	425	519	589	467	525	540	5.33008575472536	7.57722344696603	6.23615176292188	6.14396090725272	5.9342190996617	7.57938806753688	7.00268501716979	8.32223836175396	8.5509159886951	6.49711459123823	7.73480875218623
ENSMUSG00000058174	10.3548546667861	13.2155601497157	9.20294551032158	6.31473489554289	1.36125058885256	6.9277678558714	13.0487671588791	29.7388970411313	4.32615482067362	15.1016715853797	30.2870880496098	14.7883976280378	7.89618561118169	17.8818293806186	-1.16107045208526	0.0293202576801525	0.427530872385729	Gm5148	3	37768339	37778639	-	3901	protein_coding	predicted gene 5148 [Source:MGI Symbol;Acc:MGI:3646006]	-	10	12	10	6	1	6	13	31	5	18	34	17	0.103332080694241	0.136034060470064	0.0937634697311595	0.0636847772653624	0.0134002741277367	0.0699456473804993	0.129145828119477	0.299706287174132	0.0437651797206038	0.15098629151514	0.302016423771599
ENSMUSG00000120183	59.0226716006806	88.1037343314377	66.2612076743153	58.9375256917337	59.8950259095129	78.5147023665426	80.300105593102	92.094648901568	80.4664796645293	88.0930842480483	88.1888740268049	101.778971910613	68.4558112623704	88.4870273907776	-0.370860039654773	0.0293505457503561	0.427594113464737	ENSMUSG00000120183	8	73302218	73305538	+	3321	lncRNA	novel transcript	-	57	80	72	56	44	68	80	96	93	105	99	117	0.691858219419732	1.0652792730979	0.793000098474262	0.698199422979123	0.692585562294862	0.931162400347801	0.933542492750708	1.09021578927416	0.956199990748389	1.03457358787612	1.03298475693154
ENSMUSG00000030095	3824.0478284441	5224.55144585425	5707.66680550144	3893.03406310219	4934.53338459055	5515.65784124961	5801.68262910162	5953.53532378262	6478.84945944081	5257.89865697637	5247.68340294856	6112.82765483658	4849.91522812369	5808.74618784776	-0.260270455557507	0.0294072852327609	0.427849764587464	Tmem43	6	91450685	91465445	+	3973	protein_coding	transmembrane protein 43 [Source:MGI Symbol;Acc:MGI:1921372]	-	3693	4744	6202	3699	3625	4777	5780	6206	7488	6267	5891	7027	37.4689797127849	52.8042016690958	57.0982525598443	38.5501525001657	47.6956837338511	54.6791897286036	56.3796340753117	58.9119388794411	64.354946392272	51.6157322747702	51.3804675179708
ENSMUSG00000022574	290.971416136689	279.729356502315	298.175434534419	217.85835389623	326.700141324616	278.265342210835	336.256692171115	421.141154872795	288.121911056863	396.838369993589	274.365385861171	383.628432586158	281.950007434184	350.058657756948	-0.313097849646823	0.0294459933872783	0.427849764587464	Naprt	15	75762805	75766330	-	2344	protein_coding	nicotinate phosphoribosyltransferase [Source:MGI Symbol;Acc:MGI:2442664]	-	281	254	324	207	240	241	335	439	333	473	308	441	4.83236619229921	4.7920183785909	5.05588309370674	3.65656309977396	5.35233474801715	4.67568052289178	5.53860226734433	7.06345240188954	4.85088845631357	6.60304864604345	4.55324168456341
ENSMUSG00000022895	2082.36127349068	1603.48796483217	2004.40153214804	1726.02753811506	1787.32202316342	1566.83016340292	2604.73467517625	2535.48080257129	1762.47547394243	1786.19215584852	2243.0261090858	2099.95246318137	1795.07174919205	2171.97694663428	-0.274511686630479	0.0295068121863651	0.427965909995458	Ets2	16	95502942	95522095	+	5780	protein_coding	E26 avian leukemia oncogene 2, 3' domain [Source:MGI Symbol;Acc:MGI:95456]	ETS	2011	1456	2178	1640	1313	1357	2595	2643	2037	2129	2518	2414	14.0247573787394	11.1397617440204	13.7828699208908	11.7483355946936	11.8748059318047	10.6767089352743	17.3989284922429	17.2456447149336	12.0336632154147	12.0528232112072	15.0957773360315
ENSMUSG00000040035	62.1291280007164	85.9011409731517	46.93502210264	59.9899815076575	36.7537658990192	66.9684226067569	59.2213278749127	161.165635577744	61.4313984535654	62.0846498510055	108.677198295659	105.258594881916	59.7795768483236	92.9731341558004	-0.634758535937606	0.0295559527068117	0.427965909995458	Disp2	2	118610200	118641774	+	9555	protein_coding	dispatched RND tramsporter family member 2 [Source:MGI Symbol;Acc:MGI:2388733]	-	60	78	51	57	27	58	59	168	71	74	122	121	0.253123043509095	0.360999231220218	0.195231146692663	0.247004291267996	0.147714356154068	0.276046786761155	0.239295372170436	0.66311476853104	0.253724449866988	0.253420644902852	0.442442393678169
ENSMUSG00000025461	23.816165733608	3.30389003742891	8.28265095928942	30.5212186617906	5.44500235541026	3.4638839279357	8.0300105593102	39.3320896350447	12.1132334978861	63.7626133604921	34.7410715863171	29.5767952560757	12.4721352792438	31.2593023158543	-1.31865784057113	0.0295578810205032	0.427965909995458	Scart1	7	139798180	139811058	+	3851	protein_coding	scavenger receptor family member expressed on T cells 1 [Source:MGI Symbol;Acc:MGI:2443796]	-	23	3	9	29	4	3	8	41	14	76	39	34	0.240749526775626	0.0344500694555778	0.0854827748322846	0.311806248041772	0.0542970338844984	0.0354268982642596	0.0805062222390314	0.401532264572402	0.124133551039265	0.645774715993575	0.350928534194229
ENSMUSG00000083674	11.3903401334647	22.0259335828594	9.20294551032158	13.6819256070096	23.1412600104936	11.5462797597857	29.1087882774995	36.4541318568707	19.9003121750986	15.1016715853797	30.2870880496098	23.4874550562954	15.1647807673224	25.7232411667923	-0.775002319585724	0.0296199810842519	0.42811265642563	Zfp133-ps	2	144301200	144342187	+	3122	transcribed_unitary_pseudogene	zinc finger protein 133, pseudogene [Source:MGI Symbol;Acc:MGI:2176612]	-	11	20	10	13	17	10	29	38	23	18	34	27	0.142026999188679	0.283295360823041	0.117159287450754	0.172413309281354	0.284646373904265	0.145664088421593	0.359979756303363	0.459050862744302	0.25155305701933	0.188660321332659	0.377375422528189
ENSMUSG00000020101	3123.02416750268	3810.48650983468	3516.44547949387	2656.39847939171	2959.35878016548	3475.43020769549	3931.69392010226	3858.38206127194	4340.86374706391	3614.33339943421	3306.63737765151	3850.20281774679	3256.85727068065	3817.01888721177	-0.228848191087308	0.0297222095336588	0.428427411294035	Vsir	10	60182630	60208463	+	5014	protein_coding	V-set immunoregulatory receptor [Source:MGI Symbol;Acc:MGI:1921298]	-	3016	3460	3821	2524	2174	3010	3917	4022	5017	4308	3712	4426	24.24700669153	30.5164587460489	27.8741946510692	20.8432460399927	22.6654759504152	27.3003088352046	30.2748654277301	30.25295815615	34.1660233695217	28.1146271545009	25.6537720771353
ENSMUSG00000092260	25.8871366669652	19.8233402245735	34.971192939222	43.1506884528764	55.8112741429552	48.4943749910998	46.1725607160337	71.94894445435	60.5661674894306	47.8219600203691	53.4478024404878	56.5438732836741	38.023001236282	56.0835514007242	-0.570045868458187	0.0297751970835745	0.428427411294035	Zfp963	8	70194289	70202620	-	2299	protein_coding	zinc finger protein 963 [Source:MGI Symbol;Acc:MGI:4867078]	zf-C2H2	25	18	38	41	41	42	46	75	70	57	60	65	0.438341068712738	0.346238932075068	0.604580653588849	0.738423007147987	0.932254564708279	0.830798518059718	0.775410789732246	1.23036056307752	1.03966573521577	0.811291354270745	0.904356934574884
ENSMUSG00000024973	17.6032529335363	11.0129667914297	23.0073637758039	9.47210234331434	6.80625294426282	10.3916517838071	24.0900316779306	37.413451116262	13.8436954261556	20.1355621138396	25.8331045129024	20.8777378278181	13.0489317620257	23.6989304458181	-0.836079524852623	0.0298766677978821	0.428821755671178	Plaat5	19	7589906	7617007	+	1408	protein_coding	phospholipase A and acyltransferase 5 [Source:MGI Symbol;Acc:MGI:1913977]	-	17	10	25	9	5	9	24	39	16	24	29	24	0.486695567855111	0.314079586821567	0.649451873972396	0.264667240176327	0.185633769077773	0.290686758272011	0.66057413744853	1.04465301558801	0.388018104750171	0.557762806061137	0.713711898497184
ENSMUSG00000057948	77.6614100008956	60.5713173528634	71.7829749805083	70.5145396668956	57.1725247318077	73.8961904626283	63.2363331545678	119.914907423917	73.5446319514515	95.6439200407382	83.7348904900976	127.876144195386	68.5998261992665	93.991804542693	-0.452248428733151	0.0299032710606411	0.428821755671178	Unc13d	11	115952921	115968787	-	4679	protein_coding	unc-13 homolog D [Source:MGI Symbol;Acc:MGI:1917700]	-	75	55	78	67	42	64	63	125	85	114	94	147	0.646129162409008	0.519818833157986	0.609749113974306	0.592900875525966	0.4692301161865	0.622031420802343	0.521795685404951	1.00755109158482	0.620298231145818	0.797246772160052	0.696149318598133
ENSMUSG00000114004	8.28388373342886	4.40518671657188	4.60147275516079	7.36719071146671	1.36125058885256	4.61851190391427	5.01875659956888	10.5525118533047	5.19138578480834	15.1016715853797	23.160714390878	13.0485861423863	5.10624940156585	12.0122710593877	-1.21826425264583	0.0299200013262598	1	Gm48552	10	81224839	81227101	+	879	protein_coding	predicted gene, 48552 [Source:MGI Symbol;Acc:MGI:6098105]	-	8	4	5	7	1	4	5	11	6	18	26	15	0.366870031206583	0.201239616948699	0.208061032662829	0.3297383793677	0.0594703860890794	0.206945749284283	0.220441881287336	0.471969484712437	0.233075721624676	0.670076818203141	1.02497215410086
ENSMUSG00000060459	51.7742733339304	51.7609439197196	69.0220913274118	76.8292745624385	91.2037894531218	132.782217237535	146.547692707411	110.321714830003	115.075718229918	243.304708875562	79.2809069533902	67.8526479404089	78.8954316390262	127.063898256116	-0.690418370885777	0.0300153277708026	0.429404946517877	Kng2	16	22804604	22848232	-	2734	protein_coding	kininogen 2 [Source:MGI Symbol;Acc:MGI:3027157]	-	50	47	75	73	67	115	146	115	133	290	89	78	0.737195403782431	0.760224240581713	1.00339601889517	1.10556602512735	1.28104954204249	1.91286677637178	2.06950902656394	1.58638808812119	1.66106945793563	3.47088681069988	1.12802594940442
ENSMUSG00000062545	7.24839826675025	2.20259335828594	9.20294551032158	14.7343814229334	16.3350070662308	20.7833035676142	13.0487671588791	49.8846014883493	1.73046192826945	58.7287228320322	55.2293958551707	10.4388689139091	11.751104865356	31.5101363627683	-1.4294407279748	0.0300871708130464	0.429404946517877	Tlr12	4	128509236	128512412	-	3177	protein_coding	toll-like receptor 12 [Source:MGI Symbol;Acc:MGI:3045221]	-	7	2	10	14	12	18	13	52	2	70	62	12	0.0888161513225569	0.0278390971510713	0.115131034126929	0.182461463937179	0.197448420669691	0.257656251587656	0.158576605443525	0.617299945839015	0.0214954946289047	0.720977627811689	0.676241888261645
ENSMUSG00000021319	76.6259245342169	425.100518149187	268.72600890139	296.792540090516	472.35395433184	468.778958247298	326.219178971977	574.632236375409	828.891263641065	677.897257832601	345.629122448488	550.650335208703	334.729650709075	550.65323241304	-0.719327989185599	0.0301015661336375	0.429404946517877	Sfrp4	13	19807274	19817164	+	4179	protein_coding	secreted frizzled-related protein 4 [Source:MGI Symbol;Acc:MGI:892010]	-	74	386	292	282	347	406	325	599	958	808	388	633	0.71379002302774	4.08467304337114	2.5557601881552	2.79406864256339	4.34056972294529	4.41813575796119	3.01386620898587	5.40585710066082	7.82758514066964	6.32673950102434	3.21726584479545
ENSMUSG00000021124	968.178911344498	1162.96929317498	1157.73054519845	1020.8821414461	1146.17299581386	1025.30964266897	1204.50158389653	1121.44421422847	1283.13751981179	1302.09968336163	1174.07006027605	1225.69719164149	1080.20725494114	1218.49170886933	-0.174257068608751	0.030135824995077	0.429404946517877	Vti1b	12	79202791	79219441	-	1612	protein_coding	vesicle transport through interaction with t-SNAREs 1B [Source:MGI Symbol;Acc:MGI:1855688]	-	935	1056	1258	970	842	888	1200	1169	1483	1552	1318	1409	23.3807101580024	28.9695164706249	28.544682980145	24.9153522155514	27.3046545976906	25.0514761934469	28.8488953327398	27.350141889564	31.4130984753824	31.5041410258916	28.3320478601172
ENSMUSG00000095526	27.9581076003224	35.2414937325751	37.7320765923185	27.3638512140192	106.1775459305	49.6490029670784	130.487671588791	196.660448175223	40.665855314332	34.398251944476	88.1888740268049	56.5438732836741	47.3536796728023	91.1574957222169	-0.950397540806841	0.030154514857264	0.429404946517877	Gm10243	6	48500452	48500784	+	333	processed_pseudogene	predicted gene 10243 [Source:MGI Symbol;Acc:MGI:3704266]	-	27	32	41	26	78	43	130	205	47	41	99	65	3.26836578476946	4.24960055970947	4.50349042410552	3.23287898844677	12.2444703034218	5.8723186829565	15.1290653301525	23.2177289920168	4.81934799173186	4.02884525379096	10.3019290623713
ENSMUSG00000016200	37.2774768004299	44.0518671657188	44.1741384495436	59.9899815076575	32.6700141324616	39.2573511832713	66.2475871143092	68.1116674167847	34.6092385653889	82.2202119648451	62.3557695139024	59.1535905121513	42.9034715398471	62.1163441812303	-0.528589018526026	0.0301546884681883	0.429404946517877	Syt14	1	192573541	192718083	-	11932	protein_coding	synaptotagmin XIV [Source:MGI Symbol;Acc:MGI:2444490]	-	36	40	48	57	24	34	66	71	40	98	70	68	0.121618706707814	0.148248091935892	0.147142324674993	0.197798022382308	0.105144759045862	0.129583905948502	0.214359961465027	0.224416721813142	0.114467292048324	0.268753293075832	0.203288302437613
ENSMUSG00000033022	10873.6328855921	13819.070729886	13854.1141712381	12787.3381634744	11370.5261686855	13595.7444171476	15628.4080510575	19142.2565018947	18639.6706603543	13331.4200828713	14868.2878422364	11460.1382559865	12716.7377560039	15511.6968990668	-0.28658989788183	0.0302013307663791	0.429404946517877	Cdo1	18	46846260	46861462	-	1644	protein_coding	cysteine dioxygenase 1, cytosolic [Source:MGI Symbol;Acc:MGI:105925]	-	10501	12548	15054	12150	8353	11775	15570	19954	21543	15890	16691	13174	257.477906917472	337.532085331833	334.934372340118	306.009422218468	265.601364152572	325.72005290236	367.028491551694	457.760447196405	447.444352004683	316.273676792948	351.809966006494
ENSMUSG00000105810	2.07097093335722	0	0	0	0	0	3.01125395974133	3.83727703756533	3.46092385653889	2.51694526422995	2.67239012202439	0.869905742825755	0.345161822226203	2.72811599715427	-2.79330390262942	0.0303347540938518	1	Gm43435	3	108462783	108464220	+	1438	TEC	predicted gene 43435 [Source:MGI Symbol;Acc:MGI:5663572]	-	2	0	0	0	0	0	3	4	4	3	3	1	0.056063761722981	0	0	0	0	0	0.0808491294790968	0.104908629931023	0.0949807878108903	0.0682658232731294	0.0722919538451898
ENSMUSG00000052221	6.21291280007164	12.1142634705727	12.8841237144502	8.41964652739052	1.36125058885256	6.9277678558714	9.03376187922398	28.77957778174	15.574157354425	14.2626898306364	17.8159341468293	13.0485861423863	7.9866608262015	16.4191178558735	-1.01340349307278	0.0303524837833335	0.430268047258924	Ppp1r36	12	76464312	76486266	+	3347	protein_coding	protein phosphatase 1, regulatory subunit 36 [Source:MGI Symbol;Acc:MGI:2684916]	-	6	11	14	8	1	6	9	30	18	17	20	15	0.0722614484831013	0.145338053202642	0.152996657780028	0.0989679578178184	0.0156183057580821	0.0815231462298559	0.104207691835322	0.338045884017355	0.183633306819322	0.166201206626324	0.207062702179828
ENSMUSG00000026941	46.5968460005373	31.9376036951462	36.8117820412863	46.3080559006479	58.5337753206603	76.2054464145854	76.2851003134469	97.850564457916	45.8572410991403	76.3473396816419	64.1373629285854	71.3322709117119	49.3989182288106	71.9683132320737	-0.547948642122622	0.0303676005052508	0.430268047258924	Mamdc4	2	25453127	25464857	-	4630	protein_coding	MAM domain containing 4 [Source:MGI Symbol;Acc:MGI:2685841]	-	45	29	40	44	43	66	76	102	53	91	72	82	0.391780347850335	0.276986991125232	0.316001119154431	0.39348847764348	0.485486432615321	0.64825867705067	0.636129565335604	0.830862753982872	0.390867481761296	0.643133844627442	0.538863911685786
ENSMUSG00000054648	484.607198405588	491.178318897765	477.63287198569	518.860717250441	534.971481419058	555.376056445691	567.119495751283	573.672917116018	527.790888122181	595.677045867755	562.983519039805	667.217704747354	510.437774067372	582.410261774066	-0.191781803435131	0.030515135810192	0.430268047258924	Zfp869	8	70155306	70169633	-	8031	protein_coding	zinc finger protein 869 [Source:MGI Symbol;Acc:MGI:1914119]	zf-C2H2	468	446	519	493	393	481	565	598	610	710	632	767	2.34902344785074	2.45588257971817	2.36378162524755	2.5417780650667	2.55807078362772	2.72370986961915	2.7264139886225	2.80828815480032	2.59355147092382	2.89287511913833	2.72693663411655
ENSMUSG00000087589	45.5613605338587	47.3557572031478	52.456789408833	52.6227907961908	57.1725247318077	71.5869345106712	58.217576554999	70.9896251949587	64.8923223101042	66.2795586247221	107.786401588317	78.2915168543179	54.4593595307515	74.4095001879032	-0.454505093682777	0.0305263911662124	0.430268047258924	D430040D24Rik	1	36596782	36604694	+	2830	lncRNA	RIKEN cDNA D430040D24 gene [Source:MGI Symbol;Acc:MGI:2442526]	-	44	43	57	50	42	62	58	74	75	79	121	90	0.626725500306794	0.671930547863073	0.736712503145281	0.731549811873318	0.775804845807998	0.996301187676225	0.79424508775908	0.986178191538875	0.904918548180611	0.913443351645942	1.48158485101947
ENSMUSG00000074264	1498.34747028394	3309.39652082463	3715.22910251682	2408.01890683369	3767.9416299439	3648.62440409227	4180.62424744087	4078.06617167256	4224.05756690572	3393.68119793672	3456.29122448488	5502.1538233729	3057.92633908254	4139.14570530228	-0.436878178032552	0.030847114116319	0.433711370459984	Amy1	3	113349359	113400348	-	3446	protein_coding	amylase 1, salivary [Source:MGI Symbol;Acc:MGI:88019]	-	1447	3005	4037	2288	2768	3160	4165	4251	4882	4045	3880	6325	16.9263915409917	38.5630671800791	42.8502240167034	27.4916674049461	41.9894751081047	41.7020306908007	46.83954978867	46.5249528753113	48.374575185824	38.4099919608285	39.0161171369709
ENSMUSG00000026222	1266.39872574794	1408.55845262386	1281.05001503676	1224.0061139194	1291.82680882108	1414.41927057374	1492.57821271178	1509.00919502257	1572.98989279693	1542.04846521822	1229.29945613122	1652.82091136893	1314.3765644538	1499.79102220828	-0.190617261859989	0.0308496526175336	0.433711370459984	Sp100	1	85577709	85637719	+	7556	protein_coding	nuclear antigen Sp100 [Source:MGI Symbol;Acc:MGI:109561]	SAND	1223	1279	1392	1163	949	1225	1487	1573	1818	1838	1380	1900	6.52447591876667	7.48550252110981	6.73840184259376	6.37306135606282	6.56544089919448	7.37275043626205	7.62661808099213	7.85139601904436	8.21554902995651	7.95966007619133	6.32870323312813
ENSMUSG00000021340	93.1936920010747	114.534854630869	129.761531695534	143.133990965639	186.491330672801	165.111800564935	200.750263982755	164.043593355918	140.167416189825	248.338599404022	177.268544760951	175.720960050803	138.704533421809	184.381562957379	-0.414988326432351	0.0308894112435037	0.433900110024902	Gpld1	13	25127135	25176484	+	5415	protein_coding	glycosylphosphatidylinositol specific phospholipase D1 [Source:MGI Symbol;Acc:MGI:106604]	-	90	104	141	136	137	143	200	171	162	296	199	202	0.669969717653573	0.849331524606755	0.952423871734011	1.0399220372809	1.32254890194002	1.20094459131055	1.4313456225416	1.19098902505904	1.02153021261652	1.7886864354916	1.27345091389641
ENSMUSG00000047517	388.307050004478	832.580289432086	1812.98026553335	823.020448052424	76.2300329757436	1544.89223185932	750.805987295504	374.13451116262	791.686332183272	8567.68167943876	4859.29603854768	3296.07285956679	913.001719642901	3106.61290136577	-1.7665809143302	0.0310001637254531	0.434059587197256	Dmbt1	7	130633776	130723357	+	7718	protein_coding	deleted in malignant brain tumors 1 [Source:MGI Symbol;Acc:MGI:106210]	-	375	756	1970	782	56	1338	748	390	915	10212	5455	3789	1.95856332658185	4.33171013258673	9.33621990126806	4.19529315020566	0.37929130407474	7.88382060199353	3.7558635245238	1.9057676158952	4.04809766707486	43.2959222807011	24.4916235047199
ENSMUSG00000042677	235.055200936044	286.337136577172	236.515699615265	226.27800042362	220.522595394116	202.059895796249	389.455512126545	303.144885967661	306.291761303692	260.923325725172	276.146979275854	221.825964420568	234.461421457078	292.964738136582	-0.319365627505807	0.0310061378971397	0.434059587197256	Zc3h12a	4	125012216	125021633	-	2882	protein_coding	zinc finger CCCH type containing 12A [Source:MGI Symbol;Acc:MGI:2385891]	-	227	260	257	215	162	175	388	316	354	311	310	255	3.17499470579212	3.98953001886327	3.2617357017093	3.08890689128605	2.93839834778374	2.76140092675702	5.21735909068763	4.13526376732274	4.19414989562017	3.53107852793921	3.72730825643173
ENSMUSG00000039533	0	3.30389003742891	6.4420618572251	0	5.44500235541026	2.30925595195713	6.02250791948265	6.71523481573934	3.46092385653889	20.9745438685829	6.23557695139024	11.3087746567348	2.9167017003369	9.11959367807815	-1.65545391951947	0.0310463255247314	1	Mmd2	5	142548113	142594555	-	5193	protein_coding	monocyte to macrophage differentiation-associated 2 [Source:MGI Symbol;Acc:MGI:1922354]	-	0	3	7	0	4	2	6	7	4	25	7	13	0	0.0255473170563124	0.0493048154813937	0	0.0402653336201046	0.0175144727152787	0.0447760632354867	0.0508381604508801	0.0263012464610168	0.157529773841004	0.0467097251046717
ENSMUSG00000085180	54.8807297339662	58.3687239945775	68.1017967763797	68.409628035048	62.617527087218	72.7415624866497	64.2400844744816	113.199672608177	59.7009365252959	60.4066863415189	144.309066589317	123.526615481257	64.1866613523065	94.2305103366747	-0.553774597142306	0.0312154395305696	0.43528548227584	AI838599	4	3242055	3258092	+	4243	lncRNA	expressed sequence AI838599 [Source:MGI Symbol;Acc:MGI:3510989]	-	53	53	74	65	46	63	64	118	69	72	162	142	0.503516796600904	0.552389231368669	0.637923070025283	0.634308686750397	0.566727690578798	0.675231838210921	0.584547653721442	1.04886377334526	0.555278324780354	0.555265164459638	1.32302964883023
ENSMUSG00000041328	678.242980674488	759.89470860865	643.285891171478	774.607480519928	976.016672207289	787.456279617383	935.496230159638	1024.55296902994	794.282025075676	831.430918950628	921.974592098415	981.253677907452	769.917335466536	914.831735536959	-0.250272760520528	0.0312161465599485	0.43528548227584	Pcf11	7	92292751	92319142	-	7827	protein_coding	PCF11 cleavage and polyadenylation factor subunit [Source:MGI Symbol;Acc:MGI:1919579]	-	655	690	699	736	717	682	932	1068	918	991	1035	1128	3.37331650244401	3.89848729000753	3.26656618754895	3.89352362886086	4.7886539593637	3.96254707708712	4.61459464733006	5.14619251660875	4.0048108565399	4.14304150513007	4.58218490125682
ENSMUSG00000070323	22.7806802669294	26.4311202994313	21.1667746737396	51.5703349802669	20.4187588327885	36.9480952313141	29.1087882774995	46.047324450784	64.8923223101042	51.1778870393424	52.5570057331463	37.4059469415075	29.8859607140783	46.8648791253973	-0.649577886475748	0.0313526958147827	0.435947990666814	Mmp27	9	7571397	7581886	+	2210	protein_coding	matrix metallopeptidase 27 [Source:MGI Symbol;Acc:MGI:3039232]	-	22	24	23	49	15	32	29	48	75	61	59	43	0.401274471915888	0.480243321170788	0.380666959035694	0.91804536119885	0.354804090762223	0.658480773288272	0.508532488316334	0.819141772891285	1.15878710015888	0.903188761066722	0.925097126415323
ENSMUSG00000120456	13.4613110668219	8.81037343314377	15.6450073675467	6.31473489554289	14.9737564773782	5.77313987989284	22.0825290381031	23.023662225392	9.51754060548196	33.5592701897327	15.1435440248049	18.2680205993409	10.8297205200544	20.2657611138092	-0.902930543234029	0.0313854947806885	0.436036085582972	ENSMUSG00000120456	6	30047400	30047943	-	544	lncRNA	novel transcript	-	13	8	17	6	11	5	22	24	11	40	17	21	0.963286729457175	0.650329497418775	1.14303529819142	0.456680728147387	1.05702052039579	0.417980959606813	1.56724452218181	1.66388172618542	0.690443980511334	2.40603563398922	1.08287322530607
ENSMUSG00000074472	12.4258256001433	27.5324169785743	44.1741384495436	10.5245581592382	31.308763543609	30.0203273754427	36.1350475168959	56.5998363040887	59.7009365252959	27.6863979065295	45.4306320744146	38.2758526843332	25.9976716844252	43.9714505019263	-0.757357379555587	0.0315447513805278	0.437024835598692	Zfp872	9	22099386	22113419	+	3036	protein_coding	zinc finger protein 872 [Source:MGI Symbol;Acc:MGI:3588272]	zf-C2H2	12	25	48	10	23	26	36	59	69	33	51	44	0.159327449323412	0.364150245590223	0.57829453821542	0.136382474809057	0.396018707365915	0.389454722837863	0.459529834746803	0.732926381802363	0.776036209500343	0.35567483285058	0.58209786024358
ENSMUSG00000097885	100.442090267825	113.433557951726	92.9497496542479	151.553637493029	114.345049463615	136.246101165471	131.491422908705	115.11831112696	118.536642086457	179.54209551507	195.975275615122	221.825964420568	118.161697665986	160.41495194548	-0.44337556319677	0.0317135309818778	0.438008256486505	5031434O11Rik	3	51467456	51474538	+	3731	lncRNA	RIKEN cDNA 5031434O11 gene [Source:MGI Symbol;Acc:MGI:1923230]	-	97	103	101	144	84	118	131	120	137	214	220	255	1.04799113745534	1.22082760651865	0.990160837243275	1.59807654427561	1.17691113033323	1.43827573085396	1.36068947672771	1.21301482048361	1.2538049506481	1.87684966742488	2.04326655217227
ENSMUSG00000100351	0	1.10129667914297	0	0	0	0	3.01125395974133	7.67455407513067	2.59569289240417	0	0	5.21943445695453	0.183549446523829	3.08348923070512	-3.44987284505533	0.0317575426503987	1	Gm7867	1	93234416	93234961	-	546	processed_pseudogene	predicted gene 7867 [Source:MGI Symbol;Acc:MGI:3644627]	-	0	1	0	0	0	0	3	8	3	0	0	6	0	0.0809934172609463	0	0	0	0	0.212932322694032	0.552595640442534	0.187613149549533	0	0
ENSMUSG00000084106	1062.40808881225	785.224532228938	757.402415499466	890.377620271548	726.90781444727	787.456279617383	855.196124566536	954.522663094377	1029.62484732032	1048.72719342915	1180.30563722744	916.01074719552	834.962791812809	997.397868805557	-0.256142137325427	0.0317590735967237	0.438152174508943	Gm6136	1	86836515	86837405	-	891	processed_pseudogene	predicted pseudogene 6136 [Source:MGI Symbol;Acc:MGI:3646897]	-	1026	713	823	846	534	682	852	995	1190	1250	1325	1053	46.4173969028875	35.3878511255352	33.7856089934558	39.3145214049576	31.3294799605035	34.8090414953545	37.057393587236	42.1168116699236	45.6041031755757	45.9064037910401	51.5306675117592
ENSMUSG00000024608	6523.55844007523	5451.41856175771	5355.19399245613	6182.12546273649	5194.53224706139	5539.90502874516	5783.61510534317	6540.63871053011	6018.54658652114	7091.91277284526	7280.48148910178	6440.78211988189	5707.78895547202	6525.99613070389	-0.193215805625537	0.0318892783246396	0.438152174508943	Rps14	18	60880170	60911618	+	2394	protein_coding	ribosomal protein S14 [Source:MGI Symbol;Acc:MGI:98107]	-	6300	4950	5819	5874	3816	4798	5762	6818	6956	8453	8173	7404	106.078538628482	91.4373052761736	88.9065650817157	101.594484324905	83.3247180972013	91.1426164111327	93.2743190860768	107.409565778473	99.2133443711415	115.538755769385	118.300055076712
ENSMUSG00000040649	40.3839332004657	20.9246369037165	8.28265095928942	63.1473489554289	13.6125058885256	11.5462797597857	21.0787777181893	40.291408894436	38.0701624219278	78.8642849458718	91.7520608561707	53.0642503123711	26.3162259445353	53.8534908581611	-1.0310959228599	0.0319331320886731	0.438152174508943	Rimklb	6	122424255	122475720	-	5622	protein_coding	ribosomal modification protein rimK-like family member B [Source:MGI Symbol;Acc:MGI:1918325]	-	39	19	9	60	10	10	21	42	44	94	103	61	0.279630726160461	0.149453168030071	0.0585546364068175	0.441896684653466	0.09298198038474	0.0808899473589848	0.144757619590286	0.281753006639723	0.267236944431281	0.547114186142266	0.634854171221774
ENSMUSG00000097462	63.164613467395	111.23096459344	69.0220913274118	74.7243629305909	93.926290630827	114.308169621878	121.453909709567	122.792865202091	109.88433244511	93.9659565312516	109.567995003	138.315013109295	87.7294154285905	115.996678666719	-0.40729902767343	0.0320164604059457	0.438152174508943	9530026P05Rik	6	92917310	93249970	+	7775	lncRNA	RIKEN cDNA 9530026P05 gene [Source:MGI Symbol;Acc:MGI:1924659]	-	61	101	75	71	69	99	121	128	127	112	123	159	0.316257302303309	0.574464693025356	0.352834047030148	0.37811010597995	0.463914905040354	0.579055499950727	0.603111975610027	0.620897172335174	0.557747953528992	0.471366363690338	0.548191513158161
ENSMUSG00000081683	45.5613605338587	15.4181535080016	11.0435346123859	19.9966605025525	10.8900047108205	18.4740476156571	14.0525184787929	45.0880051913927	36.3397004936584	34.398251944476	57.0109892698537	36.5360411986817	20.2306269138794	37.2375844294759	-0.876271132110022	0.0321879209962868	0.440133090668728	Fzd10	5	128677908	128681157	+	3250	protein_coding	frizzled class receptor 10 [Source:MGI Symbol;Acc:MGI:2136761]	-	44	14	12	19	8	16	14	47	42	41	64	42	0.545733281805608	0.190496517397746	0.135054016770924	0.242064205442636	0.128675616916433	0.223883462918012	0.166938940992121	0.545411897116781	0.441266127740503	0.412801682926889	0.682376727823642
ENSMUSG00000039607	857.381966409887	853.504926335803	878.881296235711	909.321824958176	558.112741429552	838.25991056044	894.342426043174	839.404351967417	962.136832117812	1072.21868256196	1147.3461590558	1020.39943633461	815.910444321595	989.307981346796	-0.277025898224911	0.0322161140119839	0.440153325518623	Rbms3	9	116401814	117701749	-	11096	protein_coding	RNA binding motif, single stranded interacting protein [Source:MGI Symbol;Acc:MGI:2444477]	-	828	775	955	864	410	726	891	875	1112	1278	1288	1173	3.00798047891724	3.08871345655817	3.14808568067139	3.22409350397925	1.9315548344127	2.97546993711163	3.11188998852826	2.97407362136604	3.42194481420627	3.76881976813625	4.02232361699847
ENSMUSG00000121251	0	3.30389003742891	0.920294551032158	2.10491163184763	0	3.4638839279357	6.02250791948265	4.79659629695667	6.05661674894306	3.35592701897327	5.34478024404878	6.08934019978029	1.63216335804073	5.27762807136412	-1.68786968904873	0.0322260639409848	1	ENSMUSG00000121251	11	6576148	6577523	+	1376	lncRNA	novel transcript	-	0	3	1	2	0	3	6	5	7	4	6	7	0	0.0964151289777835	0.0265822162370097	0.0601827316163224	0	0.0991489718137092	0.16898408167288	0.137044522021086	0.173705779452112	0.0951223390181784	0.151098589577591
ENSMUSG00000078552	43.4903896005015	37.444087090861	54.2973785108973	45.2556000847241	66.7012788537757	48.4943749910998	76.2851003134469	77.704860010698	52.7790888122181	58.7287228320322	57.9017859771951	78.2915168543179	49.2805181886432	66.9485124666514	-0.445506102879374	0.0323382402097981	0.441142915696908	Dcdc2b	4	129502124	129508050	-	1371	protein_coding	doublecortin domain containing 2b [Source:MGI Symbol;Acc:MGI:2686212]	-	42	34	59	43	49	42	76	81	61	70	65	90	1.23487489169262	1.09668985997973	1.57407049087191	1.2986476529083	1.8683070745753	1.39314791613369	2.14827125273803	2.22821797904919	1.51924229489345	1.67071183337545	1.64287112227325
ENSMUSG00000029420	5.17742733339304	2.20259335828594	0	2.10491163184763	2.72250117770513	1.15462797597857	7.02625923939643	24.9423007441747	3.46092385653889	1.67796350948663	8.01717036607317	2.60971722847726	2.22701024620172	7.95572249069118	-1.84151512268465	0.0323534615044391	1	Rimbp2	5	128834855	129030550	-	8646	protein_coding	RIMS binding protein 2 [Source:MGI Symbol;Acc:MGI:2443235]	-	5	2	0	2	2	1	7	26	4	2	9	3	0.0233112680307792	0.0102295641509315	0	0.00957800586445288	0.012092174270715	0.00525981128906098	0.0313758708202864	0.113414407120666	0.0157971747480986	0.00756930016707226	0.0360707250622425
ENSMUSG00000085442	480.465256538874	440.518671657188	392.965773290731	380.989005364421	396.123921356096	473.397470151213	475.778125639129	538.178104518538	495.777342449196	491.643308279584	480.139425257049	469.749101125908	427.410016393087	491.877567878234	-0.20252597852507	0.0324313092164165	0.441142915696908	Gm3362	15	37943571	37944036	-	466	processed_pseudogene	predicted pseudogene 3362 [Source:MGI Symbol;Acc:MGI:3781540]	-	464	400	427	362	291	410	474	561	573	586	539	540	40.1368410535923	37.9591466304521	33.5159534645655	32.1649579515768	32.6434991144625	40.0113619015895	39.4189820046539	45.4032618673258	41.9858903732245	41.1483725078122	40.080251910041
ENSMUSG00000073684	341.71020400394	401.973287887184	414.132547964471	448.346177583545	283.140122481333	364.862440409227	465.740612439992	410.588643019491	460.302872919673	431.236621938065	435.599589889976	488.887027468074	375.69413005495	448.725894612545	-0.253685041957235	0.0324526184199297	0.441142915696908	Faap20	4	155334259	155341144	+	1743	protein_coding	Fanconi anemia core complex associated protein 20 [Source:MGI Symbol;Acc:MGI:1914763]	-	330	365	450	426	208	316	464	428	532	514	489	562	7.63181224556036	9.26057264826965	9.44332088006678	10.1198143683102	6.23814666060733	8.24470440392996	10.3165282770313	9.26097031151282	10.4219481307998	9.64954187942527	9.72162950636225
ENSMUSG00000061882	102.513061201182	68.2803941068642	72.7032695315405	151.553637493029	93.926290630827	98.1433779581782	103.386385951119	101.687841495481	90.8492512341459	171.99125972238	212.90041305461	184.42001747906	97.8533384869369	144.205861489466	-0.560618245211316	0.0325491401714983	0.441142915696908	Ccdc62	5	124068742	124107958	+	8505	protein_coding	coiled-coil domain containing 62 [Source:MGI Symbol;Acc:MGI:2684996]	-	99	62	79	144	69	85	103	106	105	205	239	212	0.469215123245563	0.322373799073199	0.339752290867478	0.701049216542303	0.424096224184451	0.454495933503093	0.469327374629314	0.47004740279618	0.421550533555742	0.788715737514632	0.973758310069469
ENSMUSG00000099034	43.4903896005015	31.9376036951462	46.93502210264	45.2556000847241	35.3925153101667	36.9480952313141	73.2738463537056	44.1286859320013	35.4744695295237	52.0168687940857	81.0625003680732	62.6332134834544	39.9932043374154	58.0982640768073	-0.532575632794457	0.0325540274165843	0.441142915696908	2810039B14Rik	15	75513978	75525492	+	7780	transcribed_unitary_pseudogene	RIKEN cDNA 2810039B14 gene [Source:MGI Symbol;Acc:MGI:1919915]	-	42	29	51	43	26	32	73	46	41	62	91	72	0.217610986698018	0.16483930191643	0.23977295715275	0.228849091534355	0.174696170138794	0.187049165677003	0.363627100168754	0.222991518402228	0.179944642922702	0.260767255344436	0.405311932145409
ENSMUSG00000058558	6362.02270727336	5478.95097873628	5573.30380105075	5789.55944339691	5266.67852827057	5462.5449543546	5333.9345140218	6941.63416095569	6053.15582508652	7044.92979457964	7293.8434397119	6294.63795508716	5655.51006884708	6493.68928157379	-0.199343677347424	0.0325592156627315	0.441142915696908	Rpl5	5	108048368	108056871	+	3920	protein_coding	ribosomal protein L5 [Source:MGI Symbol;Acc:MGI:102854]	-	6144	4975	6056	5501	3869	4731	5314	7236	6996	8397	8188	7236	63.1795116598701	56.1240992287683	56.5079327824263	58.1053219784479	51.5943678575081	54.8848238992607	52.5349668441039	69.618169694395	60.9394311615391	70.0937103502708	72.3801303576009
ENSMUSG00000085929	33.1355349337154	35.2414937325751	34.971192939222	30.5212186617906	46.2825200209872	34.638839279357	73.2738463537056	47.9659629695667	35.4744695295237	34.398251944476	70.3729398799756	53.0642503123711	35.7984665946079	52.4249534982698	-0.552672629556742	0.0325952104454353	0.441142915696908	Gm13421	2	27430429	27436104	+	5676	lncRNA	predicted gene 13421 [Source:MGI Symbol;Acc:MGI:3649922]	-	32	32	38	29	34	30	73	50	41	41	79	61	0.22725775717448	0.249315889073864	0.24487859806215	0.211551420227073	0.313131070940491	0.24036114379081	0.498417695439201	0.332229144293542	0.246647167360574	0.236364599984565	0.482294487944635
ENSMUSG00000038855	2278.06802669294	2491.1330882214	2570.38268103282	2057.55112013106	2648.99364590709	2228.43199363863	3547.25716457528	3159.03832117566	2550.70088226916	2352.50484030026	2880.83655154229	2500.10910488122	2379.09342593732	2831.74114412398	-0.251167932804687	0.0327727557503885	0.442257736690542	Itpkb	1	180158050	180252367	+	10463	protein_coding	inositol 1,4,5-trisphosphate 3-kinase B [Source:MGI Symbol;Acc:MGI:109235]	-	2200	2262	2793	1955	1946	1930	3534	3293	2948	2804	3234	2874	8.47573910861238	9.56045894819519	9.76392266187098	7.73661295357146	9.72246176034573	8.38854189258119	13.0895072893939	11.8698605133755	9.62068324636418	8.76925597637374	10.7105404129289
ENSMUSG00000035215	207.097093335721	201.537292283164	171.174786491981	179.969944522972	153.82131654034	177.812708300699	181.678988904393	202.416363731571	227.555743567432	270.152125027348	222.699176835366	221.825964420568	181.902190245813	221.054727081113	-0.281089661347614	0.032929198856472	0.443058756978618	Lsm7	10	80688655	80691043	-	1601	protein_coding	LSM7 homolog, U6 small nuclear RNA and mRNA degradation associated [Source:MGI Symbol;Acc:MGI:1913344]	-	200	183	186	171	113	154	181	211	263	322	250	255	5.03558334526213	5.05477842965599	4.24943541213948	4.42247221061655	3.68957841291068	4.37436263235732	4.38127206382685	4.97051322242524	5.60917615011741	6.5812062763058	5.410984261367
ENSMUSG00000073460	101.477575734504	106.825777876868	79.1453313887656	124.18978627901	171.517574195423	115.462797597857	231.866554900082	140.060611871135	121.997565942996	127.525226720984	146.090660004	191.379263421666	116.436473845405	159.819980476811	-0.461142144262189	0.0329353182010265	0.443058756978618	Pnldc1	17	13107616	13129117	-	2660	protein_coding	poly(A)-specific ribonuclease (PARN)-like domain containing 1 [Source:MGI Symbol;Acc:MGI:2685159]	-	98	97	86	118	126	100	231	146	141	152	164	220	1.48509954079875	1.61262156577979	1.18256884985819	1.83679506899982	2.47615907553004	1.70963640621133	3.36545139500093	2.07005235307881	1.80997317433839	1.86983340698591	2.13643559639333
ENSMUSG00000030272	1314.03105721515	1580.36073457016	1624.31988257176	1280.83872797928	1449.73187712798	1638.41709791359	1487.55945611221	1690.32053504753	1990.896448474	1721.59056073329	1614.12363370273	1818.97290824865	1481.28322956299	1720.57725705307	-0.216214663023429	0.0329665616347506	0.443058756978618	Camk1	6	113311085	113320945	-	5975	protein_coding	calcium/calmodulin-dependent protein kinase I [Source:MGI Symbol;Acc:MGI:1098535]	-	1269	1435	1765	1217	1065	1419	1482	1762	2301	2052	1812	2091	8.56120383220532	10.6207786373429	10.804792241314	8.4336000755515	9.31754140276157	10.8001523024283	9.61221051151882	11.1218774284314	13.1496251037076	11.2377770116927	10.5086729868029
ENSMUSG00000038387	1440.36028414994	1914.05362835048	1942.74179722888	1419.76289568123	1602.19194307947	2093.34052044914	1868.98495767945	2176.69539955894	2245.27435192961	2004.32741208179	1835.04121712341	2322.64833334477	1735.40851148986	2075.49527861966	-0.25817101962569	0.0331323462696352	0.443256766182304	Rras	7	44667385	44671071	+	1121	protein_coding	related RAS viral (r-ras) oncogene [Source:MGI Symbol;Acc:MGI:98179]	-	1391	1738	2111	1349	1177	1813	1862	2269	2595	2389	2060	2670	50.0187278753285	68.5624811087783	68.879857683699	49.8272215931206	54.8858612410331	73.549137732976	64.3705238571313	76.3376863801966	79.0435454065559	69.7351116525989	63.6779687887388
ENSMUSG00000087397	12.4258256001433	5.50648339571485	11.963829163418	4.20982326369526	5.44500235541026	8.08239583184997	7.02625923939643	17.267746669044	10.3827715696167	22.6525073780696	13.361950610122	25.2272665419469	7.93889326837195	15.9864170013659	-0.998725452306347	0.0331682391396604	0.443256766182304	Rapgef3os2	15	97664430	97666594	+	920	lncRNA	Rap guanine nucleotide exchange factor (GEF) 3, opposite strand 2 [Source:MGI Symbol;Acc:MGI:3826581]	-	12	5	13	4	4	7	7	18	12	27	15	29	0.525780582767261	0.240339162089547	0.516850743530032	0.180024866747956	0.227280301618699	0.34601554221364	0.294864977295865	0.737895374221362	0.445377302843675	0.960322048696567	0.564977334942298
ENSMUSG00000079491	176.032529335363	155.282831759159	127.000648042438	123.137330463086	81.6750353311539	124.699821405685	132.495174228618	209.131598547311	180.833271504157	165.279405684434	156.780220492098	192.249169164492	131.304699389481	172.794806603518	-0.392527615566605	0.0331866613902741	0.443256766182304	H2-T10	17	36426768	36432357	-	3419	protein_coding	histocompatibility 2, T region locus 10 [Source:MGI Symbol;Acc:MGI:95942]	-	170	141	138	117	60	108	132	218	209	197	176	221	2.00429177987715	1.82373770729781	1.47635094378862	1.41692575729379	0.917364189043009	1.43651461473059	1.49619365908202	2.40473654177369	2.08728545848644	1.885419909501	1.78377946912074
ENSMUSG00000039759	311.681125470261	292.94491665203	283.450721717905	395.723386787355	302.197630725269	400.655907664563	368.376734408356	407.710685241317	312.348378052635	385.092625427183	541.60439806361	485.407404496771	331.108948169564	416.756704281645	-0.332224235793584	0.0331993622737427	0.443256766182304	Thap3	4	152067096	152073454	-	1334	protein_coding	THAP domain containing, apoptosis associated protein 3 [Source:MGI Symbol;Acc:MGI:1917126]	THAP	301	266	308	376	222	347	367	425	361	459	608	558	9.09539973637618	8.81796098149235	8.44509437704243	11.6705775684882	8.69934947575021	11.8292998175501	10.6616203613382	12.0155377028383	9.2402992141705	11.2589481571322	15.7933894089617
ENSMUSG00000096959	6.21291280007164	11.0129667914297	3.68117820412863	3.15736744777145	9.52875412196795	4.61851190391427	12.0450158389653	7.67455407513067	16.4393883185597	15.1016715853797	17.8159341468293	7.8291516854318	6.36861521154728	12.8176192750494	-1.03262277337762	0.0332623928851553	1	4930509G22Rik	16	10996040	11010156	+	2481	lncRNA	RIKEN cDNA 4930509G22 gene [Source:MGI Symbol;Acc:MGI:1914984]	-	6	10	4	3	7	4	12	8	19	18	20	9	0.0974845095013866	0.178244279824574	0.0589715913617498	0.0500673752745221	0.147489433940389	0.0733193525275635	0.187442238115181	0.121611132479494	0.261493861806645	0.23740327416387	0.279338518418334
ENSMUSG00000062328	945.398231077569	838.086772827801	681.938262314829	918.793927301491	717.379060325302	833.641398656525	784.933532172572	1065.80369718377	824.565108820391	1047.04922991966	2419.40385713941	892.523292139225	822.539608750586	1172.37978622917	-0.511286748973141	0.0332673754650719	0.443256766182304	Rpl17	18	75131629	75136452	+	1327	protein_coding	ribosomal protein L17 [Source:MGI Symbol;Acc:MGI:2448270]	-	913	761	741	873	527	722	782	1111	953	1248	2716	1026	27.7339021791754	25.3604000244361	20.4247573404031	27.2397837184039	20.7600944681255	24.7429608956818	22.8375131085948	31.5757188268918	24.5220424542339	30.7740479341162	70.9228920556152
ENSMUSG00000022540	468.039430938731	428.404408186616	519.046126782137	460.975647374631	396.123921356096	479.170610031105	494.849400717491	493.090099327145	487.990263771984	669.507440285167	575.454672942585	530.642503123711	458.626690778219	541.922396694681	-0.239762479332647	0.0333569216140445	0.443256766182304	Rogdi	16	4826594	4831417	-	2343	protein_coding	rogdi homolog [Source:MGI Symbol;Acc:MGI:1913299]	-	452	389	564	438	291	415	493	514	564	798	646	610	7.77637635289293	7.34208957137065	8.80473796916717	7.74037775338841	6.49247570949191	8.05491945717747	8.15431736493584	8.27372230667704	8.21942576822898	11.1447817023296	9.5540568986458
[truncated: 221 more rows]
[truncated: 1 more columns]
