# Supplementary material for: Loss of CTRP10 results in female obesity with preserved metabolic health
Source: eLife. 2025 Mar 24;13:RP93373. doi: 10.7554/eLife.93373 (PMC11932693; doi:10.7554/eLife.93373)
Supplement: Figure 8—source data 5. [file elife-93373-fig8-data5.xls]

gene_id	KO_Liver1	KO_Liver2	KO_Liver3	KO_Liver4	KO_Liver5	KO_Liver6	WT_Liver1	WT_Liver2	WT_Liver3	WT_Liver4	WT_Liver5	WT_Liver6	KO_Liver	WT_Liver	log2FoldChange	pvalue	padj	gene_name	gene_chr	gene_start	gene_end	gene_strand	gene_length	gene_biotype	gene_description	tf_family	KO_Liver1_count	KO_Liver2_count	KO_Liver3_count	KO_Liver4_count	KO_Liver5_count	KO_Liver6_count	WT_Liver1_count	WT_Liver2_count	WT_Liver3_count	WT_Liver4_count	WT_Liver5_count	WT_Liver6_count	KO_Liver1_fpkm	KO_Liver2_fpkm	KO_Liver3_fpkm	KO_Liver4_fpkm	KO_Liver5_fpkm	KO_Liver6_fpkm	WT_Liver1_fpkm	WT_Liver2_fpkm	WT_Liver3_fpkm	WT_Liver4_fpkm	WT_Liver5_fpkm
ENSMUSG00000026179	2086.38366032779	1833.34279335134	1939.73431869414	1920.11788587082	1772.13886938489	1808.83870181842	1099.22401670745	1137.96954967079	1234.06218754622	1387.26676122104	1020.81077033379	1169.84010714868	1893.42603824123	1174.86223210466	0.689110339678614	6.60545870117743e-16	4.05641218839306e-12	Pnkd	1	74324089	74392853	+	7832	protein_coding	paroxysmal nonkinesiogenic dyskinesia [Source:MGI Symbol;Acc:MGI:1930773]	-	1960	1706	2095	2150	1922	1851	1124	1337	1258	1203	1051	1025	16.9312692300632	14.7568049206927	15.5196007161415	15.2708645944117	14.3155326423512	14.6583092602481	8.88273606705883	9.26528697555666	10.0360254532172	11.1234756996496	8.33102928276103
ENSMUSG00000033253	591.851691399107	543.769902365638	592.568001892243	567.997662983181	624.2133270414	548.221778346911	351.086674375424	370.244393497977	320.777691039438	370.168437532796	357.429460973201	413.153286622266	578.10372733808	363.809990673517	0.669488423852175	1.7976513824023e-12	5.51968856966626e-09	Szt2	4	118219940	118266470	-	11947	protein_coding	SZT2 subunit of KICSTOR complex [Source:MGI Symbol;Acc:MGI:3033336]	-	556	506	640	636	677	561	359	435	327	321	368	362	3.14863305872533	2.86931111855133	3.10806652203336	2.96139335227421	3.30564804518445	2.91242089211293	1.85989621472569	1.97619838547473	1.71018337690714	1.94577997955708	1.91230684126626
ENSMUSG00000055322	5750.32884341363	5920.2142137002	5863.64555622433	7955.53959411035	5160.59378353134	8019.08718915286	3101.10263076454	2624.90507942014	4023.94522521033	4454.70615012208	2425.27544578827	3187.67162855246	6444.90153002212	3302.9343599763	0.964643520049669	1.54751597150572e-11	3.80131823240664e-08	Tns1	1	73949390	74163608	-	16465	protein_coding	tensin 1 [Source:MGI Symbol;Acc:MGI:104552]	-	5402	5509	6333	8908	5597	8206	3171	3084	4102	3863	2497	2793	22.1972394967196	22.6671555752747	22.3160305941005	30.0965225368138	19.8298933698936	30.9114884561579	11.9203122729664	10.1660626366827	15.5663830361386	16.9906711745037	9.41511070782923
ENSMUSG00000069324	6206.99138947517	6165.23306298748	5951.60486900521	6070.25175361114	5787.57319621694	5354.20164627937	2804.78156576244	1795.04695606261	3647.25215683374	3961.14823341169	3224.63535443214	3635.06413782298	5922.64265292922	3177.9880673876	0.89846296816871	3.81216438478271e-11	7.80350049565021e-08	Gm5096	18	87774410	87776275	+	1866	protein_coding	predicted gene 5096 [Source:MGI Symbol;Acc:MGI:3643681]	-	5831	5737	6428	6797	6277	5479	2868	2109	3718	3435	3320	3185	211.415841004458	208.285577398686	199.863470247666	202.629874620212	196.230855072861	182.112518841759	95.1306870367197	61.3430106967529	124.494893439885	133.309980171765	110.45746400732
ENSMUSG00000006445	1140.05964296483	765.146581984851	867.556590270361	968.096645713473	855.642492606232	902.953517277265	386.29313754399	388.96939730707	378.65501144105	635.398159129503	237.962548745745	506.740495194161	916.575911802835	422.33645822692	1.11959866389765	5.31492068484215e-11	9.14078216747979e-08	Epha2	4	141028551	141056695	+	4674	protein_coding	Eph receptor A2 [Source:MGI Symbol;Acc:MGI:95278]	-	1071	712	937	1084	928	924	395	457	386	551	245	444	15.5026836858211	10.3199424080621	11.6310809405061	12.9014469026799	11.5820670612312	12.261212050971	5.2307204857217	5.30673790686008	5.16003192251567	8.53710165206905	3.2542131826553
ENSMUSG00000029385	553.530358862474	404.066172508854	539.792414223715	536.739929957378	512.647872725285	572.652338879305	208.304907080683	160.013668914068	311.948947249362	324.04152942902	212.709380307421	285.326855402118	519.904847859502	250.390881397112	1.05735406269637	5.95393725287724e-11	9.14078216747979e-08	Ccng2	5	93415116	93424090	+	5458	protein_coding	cyclin G2 [Source:MGI Symbol;Acc:MGI:1095734]	-	520	376	583	601	556	586	213	188	318	281	219	250	6.44578677966854	4.66702687389766	6.19732423755299	6.12546109517609	5.94248463244639	6.65907988511554	2.41545637257867	1.86949567519496	3.64038553829648	3.72838155191952	2.49103143039991
ENSMUSG00000022797	914.389573582434	700.667937435565	1028.66101578481	833.24185465929	1340.62950888951	490.565655490462	242.533412939011	286.833012893835	415.931929665816	409.376309421004	468.15489181816	422.283745995134	884.692590973679	374.185550455494	1.24241814552902	2.45694423868796e-10	3.35290990439616e-07	Tfrc	16	32427738	32451612	+	6185	protein_coding	transferrin receptor [Source:MGI Symbol;Acc:MGI:98822]	-	859	652	1111	933	1454	502	248	337	424	355	482	370	9.39635860490862	7.14157300000095	10.4218195712237	8.3915035951723	13.7136010056064	5.03401092108956	2.4817904126829	2.95726568412524	4.28331431269678	4.15658064435754	4.83811244741708
ENSMUSG00000015357	2455.75872672255	1543.18889287956	2158.2437693919	2368.44308526949	2129.88594603491	2815.37779575303	1092.37831553579	1149.03432464889	1216.40469996607	1530.26017634274	1013.04056466046	1530.49325237696	2245.14970267524	1255.26855558848	0.839537011885964	3.98793326547951e-10	4.45270876060175e-07	Clpx	9	65201542	65237940	+	3494	protein_coding	caseinolytic mitochondrial matrix peptidase chaperone subunit [Source:MGI Symbol;Acc:MGI:1346017]	-	2307	1436	2331	2652	2310	2881	1117	1350	1240	1327	1043	1341	44.671528933994	27.8430961627419	38.706915825337	42.2229394319967	38.5670025265262	51.1411509615409	19.7871569298863	20.9706076427965	22.1744356834065	27.5039825662192	18.5323302800221
ENSMUSG00000074768	61726.0863833813	63352.4175578243	60908.5834944989	58820.802007958	54431.0333065908	54381.4505226867	29692.7398534446	21613.7612149141	37092.4955767072	43044.4774697404	31231.3704282426	43067.2355543956	58936.7288788233	34290.3466829074	0.781401320212646	1.30196645669326e-09	1.23005784777743e-06	Bhmt	13	93753183	93774469	-	5758	protein_coding	betaine-homocysteine methyltransferase [Source:MGI Symbol;Acc:MGI:1339972]	-	57987	58952	65784	65863	59034	55649	30362	25394	37812	37327	32155	37735	681.341909505112	693.606047468528	662.853893896748	636.308453827683	598.077352831551	599.426369592698	326.371209588901	239.364423220668	410.309696556967	469.460425484353	346.693322601971
ENSMUSG00000042680	611.012357667424	648.010377720316	629.603502010508	873.430368549609	736.700809905581	1071.03577374013	428.345301884222	404.289854969055	423.779701923662	425.520727257326	454.557031889832	470.21865770269	761.632198265595	434.451879271131	0.810685942986926	1.87923554442836e-09	1.53871806377794e-06	Garem1	18	21260258	21433195	-	6233	protein_coding	GRB2 associated regulator of MAPK1 subtype 1 [Source:MGI Symbol;Acc:MGI:2685790]	-	574	603	680	978	799	1096	438	475	432	369	468	412	6.23047113864459	6.55399602009946	6.32966872451522	8.72849913255081	7.47784500979067	10.9059516375202	4.34940760266012	4.13615332660299	4.33052361986141	4.28723017844352	4.66141049814651
ENSMUSG00000056429	5439.50025728316	4308.24809996807	4722.95215258176	5031.60193906799	5363.44006410609	5673.75337804308	3312.34140977593	2779.81192911355	3909.17155593933	3860.82220828598	2742.88260268565	3395.3895792852	5089.91598184169	3333.40321418094	0.610921251666929	2.79569316465419e-09	2.14604396551768e-06	Tgoln1	6	72585415	72593983	-	5013	protein_coding	trans-golgi network protein [Source:MGI Symbol;Acc:MGI:105080]	-	5110	4009	5101	5634	5817	5806	3387	3266	3985	3348	2824	2975	68.965091793618	54.1781710133617	59.0373444164781	62.5197140838785	67.6905692313948	71.833903531109	41.818708639937	35.3605183467338	49.6688852430652	48.3654582049244	34.9732193293551
ENSMUSG00000036863	377.890918069574	387.946511371532	362.022013656042	361.696625012875	328.242163111873	367.435630407199	147.67155384593	209.379588047132	241.318996928752	215.643295385149	233.106170199914	239.674558537779	364.205643604849	214.465693824109	0.764555151339709	5.0439042646226e-09	3.6440724810644e-06	Syde2	3	145693625	145727475	+	5751	protein_coding	synapse defective 1, Rho GTPase, homolog 2 (C. elegans) [Source:MGI Symbol;Acc:MGI:3036264]	-	355	361	391	405	356	376	151	246	246	187	240	210	4.17629442585836	4.25255385587972	3.94459649920787	3.91750447112455	3.61104946406121	4.05503509787976	1.62512475324699	2.32162400916646	2.67267118430235	2.35475539605394	2.59081556696469
ENSMUSG00000087382	813.263834944097	549.143122744745	731.451127335737	792.160262682519	683.223154117691	641.057908370007	400.962497197559	315.771655144252	351.18780853859	565.054624271245	293.325264168225	383.479293660446	701.716568365799	384.963523830053	0.868378792413356	6.13211522012248e-09	4.11350007206538e-06	Ctcflos	2	172952577	172980062	+	5402	lncRNA	CCCTC-binding factor (zinc finger protein)-like, opposite strand [Source:MGI Symbol;Acc:MGI:1921411]	-	764	511	790	887	741	656	410	371	358	490	302	336	9.56852292668712	6.40843979097664	8.48480189154444	9.13412362376936	8.00185053790505	7.53181076168925	4.69766888756997	3.7275156597088	4.14078077764813	6.56884572214891	3.47073125565794
ENSMUSG00000025278	2153.4459922669	2091.25737154848	2060.0996940785	2522.05251613916	2649.91004714473	2260.31546045705	1296.77139337552	1218.8275206646	1469.49535528159	1860.06756928473	1547.24220470193	1580.71077892773	2289.5135136058	1495.51913703935	0.615304249064149	6.3634995415439e-09	4.11350007206538e-06	Flnb	14	14518185	14651816	-	9198	protein_coding	filamin, beta [Source:MGI Symbol;Acc:MGI:2446089]	-	2023	1946	2225	2824	2874	2313	1326	1432	1498	1613	1593	1385	14.880194248846	14.3329444857547	14.0347863315531	17.0792632415385	18.2272086733875	15.5966873982803	8.92284285567007	8.44986478903055	10.1758852257659	12.6995556055578	10.7520430431901
ENSMUSG00000028211	3101.89897254856	1763.49092842295	2898.02788425425	2971.27079362428	1997.11383511325	3268.80899923426	1233.20416821005	1558.43099883861	1209.53789924045	1444.92539635076	1054.80542015461	1977.88576164748	2666.76856886626	1413.13160740699	0.916513603131473	6.71187554359463e-09	4.12176277132146e-06	Trp53inp1	4	11156431	11174379	+	6475	protein_coding	transformation related protein 53 inducible nuclear protein 1 [Source:MGI Symbol;Acc:MGI:1926609]	-	2914	1641	3130	3327	2166	3345	1261	1831	1233	1253	1086	1733	30.4477985641098	17.1693872603962	28.0461827732223	28.5832016573166	19.5139634216691	32.041031547789	12.0539237381876	15.3478914323807	11.8980857786219	14.0138950287869	10.4125877951202
ENSMUSG00000028893	443.88876854933	337.438239807926	512.941676637972	433.142871928998	401.082418409171	453.431203481224	241.555455628773	261.298916790526	238.37608233206	285.986830243406	297.21036700489	272.772473764424	430.32086313577	266.20002096068	0.694302700820732	1.30304776566241e-08	7.27456029902989e-06	Sesn2	4	132219343	132237812	-	3475	protein_coding	sestrin 2 [Source:MGI Symbol;Acc:MGI:2651874]	-	417	314	554	485	435	464	247	307	243	248	306	239	8.11871636386866	6.12154191092017	9.24962553473825	7.76398655903158	7.30232663365933	8.2815821042619	4.3994184317749	4.79494592121647	4.36923351624758	5.16826095350463	5.46682587486555
ENSMUSG00000048787	531.176248216105	459.947664451567	560.161939288761	683.204736135431	440.729645976055	684.055694907019	228.84201059568	165.12048813473	265.843285234519	380.546991856145	203.967898924924	382.337986238838	559.879321495823	271.109776830806	1.04963895730153	3.39696814862816e-08	1.73839845006046e-05	Dcun1d3	7	119452019	119495521	-	7838	protein_coding	DCN1, defective in cullin neddylation 1, domain containing 3 (S. cerevisiae) [Source:MGI Symbol;Acc:MGI:2679003]	-	499	428	605	765	478	700	234	194	271	330	210	335	4.30726318955778	3.69934212553881	4.47836318196072	5.42942728627532	3.55753715463417	5.53914738668629	1.84783727661138	1.34337300730181	2.16031869277155	3.04899170317448	1.66334623435981
ENSMUSG00000041720	1008.06394200531	960.731803784349	1074.95539093265	1087.76910929798	1023.45168835444	1187.32524187433	694.349690268944	726.019465870746	727.880876915179	863.726354243189	750.796123185555	800.056502547538	1057.04952937484	760.471502171858	0.476474077934579	3.57084432313715e-08	1.75428439907082e-05	Pi4ka	16	17098215	17224178	-	11254	protein_coding	phosphatidylinositol 4-kinase alpha [Source:MGI Symbol;Acc:MGI:2448506]	-	947	894	1161	1218	1110	1215	710	853	742	749	773	701	5.69310496755496	5.38166420589315	5.98541825790671	6.02057849038401	5.75364251743594	6.69606263404368	3.90485186941957	4.1137914122816	4.1195595603387	4.81972732392569	4.26423575014053
ENSMUSG00000042246	300.183771536957	202.033086254427	304.616988472731	285.784987664494	165.965138652071	252.123384694301	32.2725912378523	88.5181998248037	103.002010884223	118.776788367221	43.7074069124838	142.663427701059	251.78455954583	88.1567374879405	1.51800368411598	4.45570224112359e-08	2.10480518944154e-05	Tmc7	7	118135064	118183959	-	5763	protein_coding	transmembrane channel-like gene family 7 [Source:MGI Symbol;Acc:MGI:2443317]	-	282	188	329	320	180	258	33	104	105	103	45	125	3.31059924606826	2.21001498158367	3.31219939512923	3.08886696456532	1.82200973285941	2.77665055450945	0.35442018338668	0.97945585475785	1.13839891006187	1.29430362335305	0.484766408303421
ENSMUSG00000021133	1901.16388640073	1726.95302984502	2052.69259405485	2549.73793681916	1629.2244444345	2267.15601740612	1135.40843718626	873.26608673316	1641.16537342196	1168.16394772811	1033.43735455295	1353.59060202765	2021.15465149339	1200.83863360835	0.751649433944256	6.48051950657701e-08	2.84263359213496e-05	Susd6	12	80837284	80927609	+	7615	protein_coding	sushi domain containing 6 [Source:MGI Symbol;Acc:MGI:2444661]	-	1786	1607	2217	2855	1767	2320	1161	1026	1673	1013	1064	1186	15.8678347842738	14.2965733620366	16.8913741028747	20.856145602608	13.5360967198208	18.8959276508931	9.43659763652871	7.312697355087	13.7271324803335	9.63356649757649	8.67441796150866
ENSMUSG00000024589	902.680277529574	668.428615160923	900.8885403768	1114.56145189153	1011.46531722956	1097.42077911512	357.932375547089	485.147825962866	618.01206530534	681.525067233278	414.734727814013	634.566926414309	949.240830217251	531.986498046149	0.836896604961981	1.14896122881725e-07	4.86604890080463e-05	Nedd4l	18	65020776	65350899	+	19400	protein_coding	neural precursor cell expressed, developmentally down-regulated gene 4-like [Source:MGI Symbol;Acc:MGI:1933754]	-	848	622	973	1248	1097	1123	366	570	630	591	427	556	2.95733310848824	2.17207412885915	2.90991501520512	3.57857975440622	3.29861557080305	3.59027873302794	1.1677032289438	1.5946789908072	2.02904935629482	2.20614123851353	1.36645322144269
ENSMUSG00000005580	562.046210537282	434.156206631853	605.530426933635	735.00326514962	606.694784628125	687.964584592202	361.844204788041	368.542120424423	301.158260394825	379.393819153551	441.93044767067	392.609753033314	605.232579745453	374.246434244137	0.694598403098715	1.47451310169983e-07	5.59905861290555e-05	Adcy9	16	4105393	4238362	-	5197	protein_coding	adenylate cyclase 9 [Source:MGI Symbol;Acc:MGI:108450]	-	528	404	654	823	658	704	370	433	307	329	455	344	6.87364864364482	5.26640963168415	7.30119968946361	8.80937228251763	7.38584150634816	8.40175634312664	4.40658480846905	4.52204965029712	3.69096095006602	4.58448697264706	5.43534735436658
ENSMUSG00000066687	1477.50026557907	1513.09885875656	1648.0797552628	2212.15442014047	1260.41302520767	1980.82984796647	410.742070299938	181.292082333492	478.714107728581	781.851092358989	108.782879426626	381.196678817229	1682.01269548551	390.429818494143	2.10772002692192	1.50438800053642e-07	5.59905861290555e-05	Zbtb16	9	48565597	48747522	-	5283	protein_coding	zinc finger and BTB domain containing 16 [Source:MGI Symbol;Acc:MGI:103222]	ZBTB	1388	1408	1780	2477	1367	2027	420	213	488	678	112	334	17.7752197505358	18.0554381628793	19.5482816093318	26.082141163099	15.094360251615	23.7970584999187	4.92064240978853	2.18826109759989	5.7715571857964	9.29387110474909	1.31615196263862
ENSMUSG00000052684	964.420202171926	416.961901418711	928.665165465499	558.173804032215	515.413958369487	837.479615050451	305.12268079424	489.403508646751	300.177288862594	340.185947265342	184.542384741598	337.826996796107	703.519107751381	326.209801184439	1.10820866535667	1.9122291798828e-07	6.46131300610512e-05	Jun	4	94937271	94940459	-	3189	protein_coding	jun proto-oncogene [Source:MGI Symbol;Acc:MGI:96646]	TF_bZIP	906	388	1003	625	559	857	312	575	306	295	190	296	19.2211691900936	8.24258044521441	18.248014145769	10.9024309128976	10.225489231337	16.6677294695328	6.05554450677537	9.78618614560707	5.99543500162192	6.69907837167257	3.69885839587468
ENSMUSG00000020038	451.340138764787	357.856477248533	489.794489064057	583.179990452858	526.478300946291	608.809568467247	111.487133367126	247.680732202095	148.126701366836	339.032774562747	157.346664884942	332.120459688065	502.909827490629	222.632411011968	1.17824488263179	1.92479100128172e-07	6.46131300610512e-05	Cry1	10	84967564	85020928	-	3340	protein_coding	cryptochrome 1 (photolyase-like) [Source:MGI Symbol;Acc:MGI:1270841]	-	424	333	529	653	571	623	114	291	151	294	162	291	8.58866202165747	6.75435300809437	9.18921473652206	10.8758838200447	9.97278481978986	11.5688907553874	2.11257195537786	4.7287534271998	2.82477767528278	6.37453375887097	3.01118314963755
ENSMUSG00000040661	1673.36485409963	1606.59289335302	1764.74158063533	1974.59564914436	1461.41524868629	1859.6542677258	671.856672133471	788.152433055464	730.823791511871	1503.73720418307	876.090689668009	1217.77501885624	1723.39408227407	964.73930156802	0.83817951785319	1.94649553188316e-07	6.46131300610512e-05	Rad54l2	9	106565281	106666393	-	11828	protein_coding	RAD54 like 2 (S. cerevisiae) [Source:MGI Symbol;Acc:MGI:1933196]	-	1572	1495	1906	2211	1585	1903	687	926	745	1304	902	1067	8.99181470803851	8.56280127150763	9.34933616577511	10.3986095600541	7.81708362144112	9.97878378468285	3.59499712054872	4.2491280373151	3.93548941528697	7.98387699659872	4.73438798250753
ENSMUSG00000017639	289.538956943448	308.422849760747	239.804863265767	215.231818834822	300.581306669862	286.326169439652	144.737681915216	97.8807017293502	145.183786770143	201.805222954016	78.6733324424709	148.369964809101	273.31766081905	136.108448436716	1.00950991432807	2.31782590980319e-07	7.29936867287252e-05	Rab11fip4	11	79482038	79588849	+	7451	protein_coding	RAB11 family interacting protein 4 (class II) [Source:MGI Symbol;Acc:MGI:2442920]	-	272	287	259	241	326	293	148	115	148	175	81	130	2.46979247860721	2.60947608721288	2.01676082097448	1.79928651202287	2.55228897052806	2.4389516852074	1.22942001071607	0.837690178991838	1.24108333424802	1.70086971025214	0.674899457776769
ENSMUSG00000067279	1174.12304966406	674.876479615851	1319.3896917132	1527.16352783214	773.581951828263	1899.72038699892	513.427587874923	449.400091418234	342.359064748514	379.393819153551	534.201640041469	663.099611954521	1228.14251460874	480.313635865202	1.3546901933083	2.54933746138556e-07	7.82774067518435e-05	Ppp1r3c	19	36709131	36714053	-	2725	protein_coding	protein phosphatase 1, regulatory subunit 3C [Source:MGI Symbol;Acc:MGI:1858229]	-	1103	628	1425	1710	839	1944	525	528	349	329	550	581	27.3851503038139	15.6127399195946	30.3401380749392	34.908199474439	17.9606587439415	44.2465989774841	11.9246577297765	10.5164112915734	8.00226099998817	8.74333166856763	12.5303962982992
ENSMUSG00000020709	658.914023338215	882.282786249385	823.113990128443	1125.27838892894	885.147406144378	1013.37965088368	443.992618848029	548.983066221138	628.802752159878	679.218721828089	472.039994654825	571.795018225844	898.019374278841	557.4720286563	0.689016561257381	3.08223876722087e-07	9.23318452170895e-05	Adap2	11	80044931	80069784	+	1785	protein_coding	ArfGAP with dual PH domains 2 [Source:MGI Symbol;Acc:MGI:2663075]	-	619	821	889	1260	960	1037	454	645	641	589	486	501	23.4616499964272	31.1595318976386	28.8956677930088	39.2672212870366	31.3732723524744	36.0321914316691	15.7423932884013	19.6119890038533	22.4374553068059	23.8959684492397	16.9031121340998
ENSMUSG00000029238	492.854915679472	444.902647390068	454.610763951705	618.010035824468	583.644070926449	670.374581008879	332.505485480903	249.383005275649	362.959466925359	416.295345636571	234.07744590908	302.446466726245	544.066169130173	316.277869325634	0.784715108423409	3.37606544832305e-07	9.87257996102469e-05	Clock	5	76357715	76452639	-	13727	protein_coding	circadian locomotor output cycles kaput [Source:MGI Symbol;Acc:MGI:99698]	bHLH	463	414	491	692	633	686	340	293	370	361	241	265	2.28197814311891	2.04319913243306	2.07527212937069	2.80432475668815	2.69001612526275	3.09954982680194	1.53305031608029	1.15848958443358	1.68414655851279	1.9044919007183	1.0899586758678
ENSMUSG00000061589	926.098869635294	805.983056866064	1105.50967853022	976.134348491537	948.767375961005	1184.39357461044	679.680330615374	650.268314097596	639.593439014416	793.382819384932	703.203613436406	669.947456484172	991.147817349092	689.345995505483	0.524918870683523	4.21867025163517e-07	0.000112638495718659	Dot1l	10	80591040	80631295	+	8705	protein_coding	DOT1-like, histone H3 methyltransferase (S. cerevisiae) [Source:MGI Symbol;Acc:MGI:2143886]	-	870	750	1194	1093	1029	1212	695	764	652	688	724	587	6.76171092912669	5.83684923934034	7.95801487328524	6.98472370988347	6.89562136134556	8.63543032851707	4.94161782401587	4.76348421055615	4.67985731570104	5.72357297791354	5.16343143583405
ENSMUSG00000019577	668.494356472373	156.898035069927	437.018901395529	364.37585927223	425.977189206982	473.952874328435	59.6553959245149	148.948893935968	178.536818865987	164.903696470996	108.782879426626	107.282897631196	421.119535957579	128.018430375881	1.71793822065391	4.81184707484592e-07	0.000117032309705807	Pdk4	6	5483351	5496309	-	3511	protein_coding	pyruvate dehydrogenase kinase, isoenzyme 4 [Source:MGI Symbol;Acc:MGI:1351481]	-	628	146	472	408	462	485	61	175	182	143	112	94	12.1013810797245	2.81713730323927	7.79974428077906	6.46438447846971	7.67605279565266	8.567636835322	1.07535567461833	2.70524975330188	3.23887621543437	2.94952967438774	1.98041322091137
ENSMUSG00000038754	166.059107658742	174.09234028307	160.178538011497	193.797944759985	87.5927120663707	151.46947530084	56.721523993801	60.4306941111641	89.2684094329936	96.8665070179278	33.0233741116544	47.9349117075557	155.531686346751	64.0409033958494	1.28208442561284	5.10420656688014e-07	0.000120557432796965	Elovl3	19	46120336	46124133	+	1975	protein_coding	elongation of very long chain fatty acids (FEN1/Elo2, SUR4/Elo3, yeast)-like 3 [Source:MGI Symbol;Acc:MGI:1195976]	-	156	162	173	217	95	155	58	71	91	84	34	42	5.3439652015338	5.55691690518828	5.0821584159816	6.11210039358135	2.80597186665129	4.86759838597563	1.8176657303833	1.95115331284729	2.87890997275698	3.08006405130257	1.06876061407357
ENSMUSG00000018900	1612.68941091663	1390.58943411292	1561.04632998488	2138.02893896499	1596.03141670408	1812.7475915036	976.001395617473	775.385385003809	1188.93749706361	1224.66941015523	705.146164854739	1269.13385282862	1685.18885369785	1023.21228425391	0.720821276909002	5.28530294789383e-07	0.000121057491311838	Slc22a5	11	53755368	53782486	-	3071	protein_coding	solute carrier family 22 (organic cation transporter), member 5 [Source:MGI Symbol;Acc:MGI:1329012]	-	1515	1294	1686	2394	1731	1855	998	911	1212	1062	726	1112	33.3763575688186	28.5456836128185	31.8527511730214	43.3652819912031	32.8809274188672	37.4640080184451	20.1142503164868	16.1004756871766	24.6590644196807	25.0433407157766	14.6765989856666
ENSMUSG00000021250	56.4175173455983	51.5829156394281	97.2181878104461	41.9746700632225	62.6979412685601	62.5422349629275	32.2725912378523	4.25568268388479	20.6004021768447	14.9912451337269	7.77020567333046	15.9783039025186	62.0722445150304	15.9780718013596	1.96403684316991	5.32250816710573e-07	0.000121057491311838	Fos	12	85520664	85524047	+	2352	protein_coding	FBJ osteosarcoma oncogene [Source:MGI Symbol;Acc:MGI:95574]	TF_bZIP	53	48	105	47	68	64	33	5	21	13	8	14	1.52456054168452	1.38257884703286	2.59012770219954	1.11162520579444	1.68654682103145	1.68769046518356	0.868419862609454	0.115380610833854	0.557873547507362	0.400270512012034	0.211164687154393
ENSMUSG00000020085	1515.8215981157	1322.88685733617	1583.26763005584	1550.38355807988	1391.34107903319	1430.65362477697	835.175542943208	993.276338418711	1176.18486714461	1147.40683908141	847.923694102186	1156.14441808938	1465.72572456629	1026.01861662992	0.515393520175834	6.95139052464038e-07	0.000150480041196731	Aifm2	10	61551042	61575039	+	4121	protein_coding	apoptosis-inducing factor, mitochondrion-associated 2 [Source:MGI Symbol;Acc:MGI:1918611]	-	1424	1231	1710	1736	1509	1464	854	1167	1199	995	873	1013	23.3783307088671	20.2367807508312	24.0748001710874	23.4339204607099	21.3605992538453	22.0337593806858	12.8265063892719	15.3698060920646	18.1790155175124	17.4850962804219	13.1516503116769
ENSMUSG00000021895	781.32939116357	689.921496677351	915.702740424106	1051.15290775347	671.23678299282	872.659622217097	514.405545185161	569.410343103785	638.612467482185	516.621370762282	521.575055822307	550.110177215283	830.333823538068	551.7891599285	0.589820631190246	6.98368535109402e-07	0.000150480041196731	Arhgef3	14	26836856	27125868	+	4527	protein_coding	Rho guanine nucleotide exchange factor (GEF) 3 [Source:MGI Symbol;Acc:MGI:1918954]	-	734	642	989	1177	728	893	526	669	651	448	537	482	10.9696226549584	9.60750284293346	12.675205006284	14.4631807439127	9.38096880674135	12.2346374561029	7.19164722016059	8.02076459375922	8.98512836223918	7.16663161925936	7.36431598819553
ENSMUSG00000039087	1605.23804070118	1412.08231562934	1611.97014264749	1539.66662104246	1508.43870463771	1716.00257179532	869.404048801536	760.916063878601	1052.58245408354	1358.43744365618	963.505503492976	1198.37279268889	1565.56639940892	1033.86971776695	0.599927119455132	7.14853852228337e-07	0.000151376465742559	Rreb1	13	37962376	38135981	+	13994	protein_coding	ras responsive element binding protein 1 [Source:MGI Symbol;Acc:MGI:2443664]	zf-C2H2	1508	1314	1741	1724	1636	1756	889	894	1073	1178	992	1050	7.29063901000068	6.36120634879647	7.21815322148482	6.85319733147819	6.81974658187116	7.78274466126132	3.9319955445976	3.46733494116072	4.79083974883841	6.09608456222565	4.40086884945007
ENSMUSG00000036087	931.421276932048	813.505565396814	1016.62447824638	1182.43538646184	868.550892279171	1196.12024366599	618.069020070384	471.529641374435	729.84281997964	736.877356957808	526.431434368138	717.882368191728	1001.44297383037	633.438773490355	0.662342362507735	7.45864672234194e-07	0.000155266269565769	Slain2	5	73071647	73136172	+	8446	protein_coding	SLAIN motif family, member 2 [Source:MGI Symbol;Acc:MGI:1923241]	-	875	757	1098	1324	942	1224	632	554	744	639	542	629	7.00911360247956	6.07198640456902	7.54258925658751	8.72036680804148	6.50618836610465	8.98836046707163	4.63147289609533	3.56007243574234	5.50396483148158	5.47895007265362	3.98397709787807
ENSMUSG00000019944	3296.69907960977	3430.26389002197	3834.1001497434	4461.81811991191	2926.51861156485	3868.82356590984	1561.79782445	1946.5492596089	2786.94012306742	2217.55110708899	2177.60013995086	2990.22544461419	3636.37056946029	2280.11064979673	0.673714103598996	7.71925808287842e-07	0.000158013212956521	Rhobtb1	10	68987264	69127621	+	6075	protein_coding	Rho-related BTB domain containing 1 [Source:MGI Symbol;Acc:MGI:1916538]	-	3097	3192	4141	4996	3174	3959	1597	2287	2841	1923	2242	2620	34.4906235650223	35.5961139599532	39.5483294570709	45.7481980569354	30.4780689484663	40.4193532137561	16.2709068782707	20.4324304464185	29.2199012063313	22.9234808192109	22.9117335322541
ENSMUSG00000004071	2908.16334694669	3470.02572082736	3481.33701111693	3090.94325720879	2751.33318743211	3226.78843511854	1695.7779759526	1874.20265398286	2616.25107645927	2451.64516571565	1831.82598748765	2437.83265255569	3154.76515977507	2151.25591869229	0.552717950318007	9.07191447442737e-07	0.000179711699314382	Cdip1	16	4568212	4608156	-	10094	protein_coding	cell death inducing Trp53 target 1 [Source:MGI Symbol;Acc:MGI:1913876]	zf-LITAF-like	2732	3229	3760	3461	2984	3302	1734	2202	2667	2126	1886	2136	18.3114829817129	21.67158784985	21.6119393293099	19.073752549909	17.2449653248128	20.2891526069276	10.632586349619	11.8400670317428	16.5087240077907	15.2527278602704	11.5997067953355
ENSMUSG00000060181	339.569585532941	318.09464644314	408.316388803873	293.822690442558	383.563875995897	398.706747888663	187.767803565686	171.078443892169	226.604423945291	269.842412407085	236.019997327413	238.53325111617	357.012322517845	221.641055375636	0.690935987429618	9.55304552401801e-07	0.0001858805028406	Slc35e3	10	117569584	117582270	-	3526	protein_coding	solute carrier family 35, member E3 [Source:MGI Symbol;Acc:MGI:2448489]	-	319	296	441	329	416	408	192	201	231	234	243	209	6.12088892057597	5.68715927321742	7.25647121197049	5.19052676920013	6.88236703478132	7.1767529310727	3.3703270530314	3.09395431270144	4.09339319940739	4.80597061728346	4.27851037427229
ENSMUSG00000023067	596.109617236511	192.361289572034	790.707927524961	824.311073794774	222.208880084161	1173.64412797619	39.1182924095179	131.926163200429	138.316986044529	189.120323225478	48.5637854583154	112.989434739239	633.223819364771	110.005830846251	2.5258226778741	1.03046005547951e-06	0.00019175924850605	Cdkn1a	17	29309950	29319701	+	3553	protein_coding	cyclin-dependent kinase inhibitor 1A (P21) [Source:MGI Symbol;Acc:MGI:104556]	-	560	179	854	923	241	1201	40	155	141	164	50	99	10.6634796035427	3.41305912393055	13.9454283399933	14.4512142136901	3.9568413919426	20.9651483645344	0.696815671556239	2.36775431948156	2.47957755762349	3.34269077177202	0.873661947979052
ENSMUSG00000024411	60.675443183002	97.7926108997491	77.7745502483568	81.2701058670904	77.4503980376331	66.4511246481104	17.6032315842831	34.0454614710783	47.0866335470735	26.5229721596707	16.5116870558272	35.3805300698626	76.9023721473236	29.5250859812992	1.38093633636061	1.17668343961403e-06	0.000215701880676709	Aqp4	18	15522553	15544039	-	6233	protein_coding	aquaporin 4 [Source:MGI Symbol;Acc:MGI:107387]	-	57	91	84	91	84	68	18	40	48	23	17	31	0.618705322130212	0.989077343000085	0.781900254204822	0.812160962231211	0.786156421554964	0.676646634444685	0.178742778191512	0.348307648556041	0.481169291095713	0.267225729279678	0.169324740317288
ENSMUSG00000013539	1876.68081283566	1472.26238387534	1720.29898049342	1525.37737165924	1787.81335470203	1472.67418889268	1021.96538919866	994.978611492265	1293.90145101229	1250.03920961231	868.320483994678	1313.64484227135	1642.51784874306	1123.80833126359	0.548237766645772	1.26559276356018e-06	0.000225275511913712	Tango2	16	18118689	18165967	-	7910	protein_coding	transport and golgi organization 2 [Source:MGI Symbol;Acc:MGI:101825]	-	1763	1370	1858	1708	1939	1507	1045	1169	1319	1084	894	1151	15.0793267483148	11.7335673832258	13.6281975807058	12.0118314084534	14.2997397200583	11.8164469362089	8.1769799452784	8.02117837978136	10.4189056164561	9.92431088952152	7.0166474984718
ENSMUSG00000049553	661.042986256916	687.772208525708	681.453202176079	751.078670705748	704.429810723234	660.602356795921	357.932375547089	417.05690302071	472.828278535197	621.56008669837	447.758101925668	479.349117075557	691.063205863935	466.080810467098	0.570358726998192	1.49499118940556e-06	0.000258612419553226	Polr1a	6	71886037	71961919	+	11871	protein_coding	polymerase (RNA) I polypeptide A [Source:MGI Symbol;Acc:MGI:1096397]	-	621	640	736	841	764	676	366	490	482	539	461	420	3.53924329736503	3.65240271611073	3.59715957792456	3.94100091778818	3.7543336034211	3.53190920954892	1.90830112387413	2.24031415000928	2.53695944643563	3.28813032180551	2.41091691591133
ENSMUSG00000060317	2369.53572851513	1711.90801278352	2099.91285670563	2051.40036457919	2267.2681996969	1987.67040491554	694.349690268944	964.337696168294	1331.17836923706	1819.70652469393	976.132087712139	1422.06904732415	2081.28259453265	1201.29556923409	0.793649377679678	1.63215494979965e-06	0.000278418431853323	Acnat2	4	49379840	49408151	-	1744	protein_coding	acyl-coenzyme A amino acid N-acyltransferase 2 [Source:MGI Symbol;Acc:MGI:2444345]	-	2226	1593	2268	2297	2459	2034	710	1133	1357	1578	1005	1246	86.3544659115617	61.8807093250253	75.4511328442567	73.2676664773267	82.250558424002	72.3360197403892	25.1979374647063	35.2601029632831	48.6168883281874	65.5251584963892	35.7757053403144
ENSMUSG00000034858	3292.44115377237	3200.29005779619	3843.35902477297	4752.96157609511	2810.3430145084	3507.25127003042	2294.28784981823	2107.41406505975	3019.43037620609	2091.8552825062	2152.34697151254	2622.72445485626	3567.77434949591	2381.34316665985	0.583417130976341	1.92207955718652e-06	0.000310618172649538	Fam214a	9	74860166	74939750	+	6637	protein_coding	family with sequence similarity 214, member A [Source:MGI Symbol;Acc:MGI:2387648]	-	3093	2978	4151	5322	3048	3589	2346	2476	3078	1814	2216	2298	31.5292924934029	30.3975697629545	36.2869203039021	44.6067824157922	26.7898296517409	33.5391290753706	21.8780855285454	20.2478525533438	28.9768111004216	19.7930639083191	20.7284372969467
ENSMUSG00000024085	5053.09348753878	5684.86716109531	5930.30945643721	6364.0744440537	5894.52850779271	7189.42535347277	3891.2921374368	3914.37693263723	4242.70187689777	5004.7695292596	4538.77138893415	4903.05668322999	6019.38306839841	4415.82809139926	0.447236354300189	2.10955216731998e-06	0.000332173329731077	Man2a1	17	64907731	65062105	+	7223	protein_coding	mannosidase 2, alpha 1 [Source:MGI Symbol;Acc:MGI:104669]	-	4747	5290	6405	7126	6393	7357	3979	4599	4325	4340	4673	4296	44.4639191694178	49.6162623479701	51.4482627287792	54.8815095430591	51.6313994526488	63.1732589158333	34.0964724368526	34.5577884407298	37.4129788747842	43.5130651024505	40.1649092376171
ENSMUSG00000026923	859.036537696186	499.70949525696	727.74757732391	796.625653114777	537.542643523096	904.907962119857	384.337222923514	457.060320249227	466.942449341813	533.918961301197	434.160241997339	358.37053038506	720.928311505798	439.131621033025	0.715333314463996	2.17409392077021e-06	0.000338002804239236	Notch1	2	26347915	26406675	-	14232	protein_coding	notch 1 [Source:MGI Symbol;Acc:MGI:97363]	-	807	465	786	892	583	926	393	537	476	463	447	314	3.83631025484941	2.21346676711943	3.20424567003977	3.48655695847751	2.38962320386894	4.03547993081993	1.70914827474784	2.04789882824365	2.08975228813325	2.355931276694	1.94989044803653
ENSMUSG00000024827	2196.02525064093	2086.9587952452	2167.50264442147	3453.53296030812	2122.50971765037	2939.48504325759	2011.65818715946	1503.95826048489	1640.18440188973	1508.34989499345	1643.39849990939	1578.42816408451	2494.33573525395	1647.66290142024	0.598351793376343	2.29229876586314e-06	0.000351925168029139	Gldc	19	30075847	30152829	-	6091	protein_coding	glycine decarboxylase [Source:MGI Symbol;Acc:MGI:1341155]	-	2063	1942	2341	3867	2302	3008	2057	1767	1672	1308	1692	1383	22.9148359036024	21.5996450379171	22.2988265472041	35.3169684806614	22.0466966674502	30.6294622858729	20.9025281919959	15.7451969310696	17.1514746347757	15.5513002473007	17.2456823667014
ENSMUSG00000022477	5702.42717774284	5865.40736583331	6279.36904505186	6785.60730085883	6089.99855998293	5883.85619862166	3368.0849764595	3755.21440025994	4591.9277423719	5112.01459060088	4316.34925153507	5176.97046441602	6101.11094134857	4386.76023760722	0.476254838112974	2.55391265490072e-06	0.00037915281076891	Aco2	15	81756510	81799334	+	4302	protein_coding	aconitase 2, mitochondrial [Source:MGI Symbol;Acc:MGI:87880]	-	5357	5458	6782	7598	6605	6021	3444	4412	4681	4433	4444	4536	84.2475661731838	85.9506397043613	91.4653445163894	98.2486809383498	89.5631218135573	86.8057235447422	49.5502514127116	55.6628250933318	67.986397140581	74.6233750093063	64.1316284741867
ENSMUSG00000063870	3513.85329731736	2855.32930945751	2808.21679646746	3105.23250659202	2815.8751857968	3451.54959201656	1706.53550636522	1424.80256256463	1815.77830615902	2741.09151406684	1933.80993695012	2453.81095645821	3091.67611460795	2012.63813042734	0.61990616889387	2.56226048638817e-06	0.00037915281076891	Chd4	6	125072944	125107554	+	8019	protein_coding	chromodomain helicase DNA binding protein 4 [Source:MGI Symbol;Acc:MGI:1344380]	-	3301	2657	3033	3477	3054	3532	1745	1674	1851	2377	1991	2150	27.8503997974918	22.446949473968	21.9442828264466	24.1202787448087	22.2164992478223	27.3181082518134	13.4687826144582	11.3301428917414	14.4224817160302	21.4662671596087	15.4141531717885
ENSMUSG00000096188	1640.36592885976	1400.26123079531	1530.49204238731	1753.11228370438	1627.38038733836	1802.97536729064	928.081487415813	1044.34453062533	1165.39418029007	1476.0610593208	900.372582397167	1191.52494815924	1625.76454006263	1117.62979803474	0.541651732341252	2.75918368970826e-06	0.000398685812670551	Cmtm4	8	105074823	105122439	-	7734	protein_coding	CKLF-like MARVEL transmembrane domain containing 4 [Source:MGI Symbol;Acc:MGI:2142888]	-	1541	1303	1653	1963	1765	1845	949	1227	1188	1280	927	1044	13.4804563364382	11.4136942909888	12.4004624327493	14.11932636809	13.3127368974495	14.7959325547828	7.59477951547165	8.61074130664246	9.5976755543237	11.9854229341265	7.44122077937469
ENSMUSG00000040761	732.363244033428	706.041157814672	749.96887739487	1032.39826793798	933.092890643865	980.154088559629	466.485636983502	566.005796956678	528.743655872347	657.308440478796	654.639827978091	564.947173696193	855.669754397408	573.021755327601	0.57949075120681	2.99529031324146e-06	0.000419118021802193	Spen	4	141195201	141265908	-	14089	protein_coding	spen family transcription repressor [Source:MGI Symbol;Acc:MGI:1891706]	-	688	657	810	1156	1012	1003	477	665	539	570	674	495	3.30380489409092	3.15915684736524	3.33560061244293	4.56431396084915	4.19012665339958	4.41540864995972	2.09551771001447	2.56177877483164	2.39035490921459	2.92982883113293	2.96994461975767
ENSMUSG00000021215	1732.97581582329	1267.00536539345	1375.86882939355	1555.74202659859	1716.81715650087	1596.78143639724	580.906642281342	581.326254618663	871.102720620861	1363.05013446656	904.257685233832	1077.3942059984	1540.86510501783	896.339607203275	0.782763202367084	3.07336097539517e-06	0.000419118021802193	Net1	13	3932018	3968220	-	5217	protein_coding	neuroepithelial cell transforming gene 1 [Source:MGI Symbol;Acc:MGI:1927138]	-	1628	1179	1486	1742	1862	1634	594	683	888	1182	931	944	21.1125011826372	15.3101327529108	16.5259779080879	18.5748433198246	20.8202359513267	19.4259092560936	7.04723467575883	7.10558786019847	10.6352063524808	16.4075675779806	11.0789210618703
ENSMUSG00000022791	814.328316403448	543.769902365638	510.164014129103	691.242438913495	521.868158205956	813.049054518057	364.778076718755	409.396674189717	459.094677083967	442.818317796241	399.194316467352	426.848975681568	649.070314089283	417.021839656267	0.638301669699006	3.07349451617156e-06	0.000419118021802193	Tnk2	16	32462692	32502311	+	6377	protein_coding	tyrosine kinase, non-receptor, 2 [Source:MGI Symbol;Acc:MGI:1858308]	-	765	506	551	774	566	832	373	481	468	384	411	374	8.116170114421	5.37551512205312	5.01307701922967	6.75184383585317	5.17758003868531	8.09202190112163	3.62030817087841	4.0938205928703	4.58546336304624	4.36076184597152	4.00123471971364
ENSMUSG00000009569	845.198278724624	727.534039331101	763.857189939219	833.24185465929	787.412380049269	1016.31131814757	492.890484359926	452.804637565342	537.572399662423	664.227476694362	559.454808479793	675.653993592214	828.925843475179	563.76730005901	0.557999457029535	3.12111382603622e-06	0.000419118021802193	Mrtfb	16	13074345	13235393	+	8990	protein_coding	myocardin related transcription factor B [Source:MGI Symbol;Acc:MGI:3050795]	-	794	677	825	933	854	1040	504	532	548	576	576	592	5.97539932602124	5.10170056647621	5.32431145012764	5.77324246230708	5.54146999459914	7.17503109892278	3.46995602014409	3.21182657696134	3.80868151855526	4.63991851364189	3.977694413957
ENSMUSG00000026435	1785.13540733148	1012.31471942378	1629.56200520367	1814.73467166954	1253.9588253712	1730.66090811476	258.180729902818	378.755758865747	456.151762487275	861.420008838001	302.066745550721	868.534947844046	1537.72775618574	520.851658914768	1.56262125116826	3.13946083746961e-06	0.000419118021802193	Slc45a3	1	131890705	131910707	+	3563	protein_coding	solute carrier family 45, member 3 [Source:MGI Symbol;Acc:MGI:1922082]	-	1677	942	1760	2032	1360	1771	264	445	465	747	311	761	31.8436882360552	17.9110509181428	28.6593304887776	31.7252991893393	22.2663941794329	30.8285344256591	4.58607581668804	6.77866755673002	8.15437955492096	15.18281643508	5.41892562595418
ENSMUSG00000022237	885.648574179959	735.056547861851	764.783077442176	985.958207442504	868.550892279171	884.386291272646	585.796428832531	399.183035748394	402.198328214587	627.325950211342	567.225014153123	701.904064289209	854.063931746384	547.272136908198	0.643935299031387	3.24848564657839e-06	0.000429009685067481	Ankrd33b	15	31291624	31367872	-	8761	protein_coding	ankyrin repeat domain 33B [Source:MGI Symbol;Acc:MGI:1917904]	-	832	684	826	1104	942	905	599	469	410	544	584	615	6.4250390126115	5.28918075986227	5.47010373212838	7.00992285046516	6.2722596667184	6.40685712349319	4.2318110448081	2.90548949306003	2.92404443574227	4.49668826770086	4.13835545322002
ENSMUSG00000024270	57.4819988049493	50.5082715636067	56.4791376803544	39.2954358038679	46.101427403353	77.2005712823636	29.3387193071385	11.0647749781005	23.5433167735368	16.1444178363213	22.3393413108251	15.9783039025186	54.5111404230825	19.7348123514068	1.46467507641245	3.3931488424383e-06	0.000443347383859864	Slc39a6	18	24712938	24736874	-	4073	protein_coding	solute carrier family 39 (metal ion transporter), member 6 [Source:MGI Symbol;Acc:MGI:2147279]	-	54	47	61	44	50	79	30	13	24	14	23	14	0.896985603668278	0.781752782891402	0.86892965683414	0.600946917151637	0.716114390871373	1.20299222760721	0.455889899528477	0.173232386783989	0.368171886987427	0.248920799628553	0.350575893576725
ENSMUSG00000002550	1842.61740613643	1934.35933647855	1917.51301862318	1887.96707475856	1726.03744198154	1582.12310007781	1028.81109037032	831.560396431089	1412.59900641221	1661.7218644385	879.975792504674	1096.79643216574	1815.10289634268	1151.91076372042	0.656774588864522	3.47644527398346e-06	0.000449449482684894	Uck1	2	32145014	32150171	-	2751	protein_coding	uridine-cytidine kinase 1 [Source:MGI Symbol;Acc:MGI:98904]	-	1731	1800	2071	2114	1872	1619	1052	977	1440	1441	906	961	42.5708773350801	44.3269554010536	43.6775936590758	42.7476492976349	39.6955716978826	36.5011374845903	23.6689109165155	19.2754319998224	32.7058690447064	37.9333285229866	20.4458999379108
ENSMUSG00000020387	504.564211732332	451.350511844996	501.831026602493	562.639194464472	420.445017918579	600.014566675585	267.960303005198	176.18526311283	367.864324586512	266.382894299301	277.784852821564	414.294594043875	506.807421539743	295.078705311547	0.782443121620556	3.58661063264583e-06	0.000458861997814126	Jade2	11	51704282	51748480	-	10760	protein_coding	jade family PHD finger 2 [Source:MGI Symbol;Acc:MGI:1924151]	-	474	420	542	630	456	614	274	207	375	231	286	363	2.98038379528636	2.6443747836372	2.92251137610262	3.25706273221935	2.47217595686377	3.5392092473638	1.57612775605198	1.04413876789988	2.1775733267016	1.5547024050778	1.65014605526858
ENSMUSG00000023963	1275.24878830239	1112.25661847517	1347.1663168019	1657.55292845406	1530.56738979132	1651.5058919898	511.471673254447	945.612692359201	1112.42171754961	937.52940720923	720.6865762014	1008.91576070189	1429.04965563577	872.77297121263	0.71184164408549	3.66780713319489e-06	0.000464412445462883	Cyp39a1	17	43978316	44062322	+	3053	protein_coding	cytochrome P450, family 39, subfamily a, polypeptide 1 [Source:MGI Symbol;Acc:MGI:1927096]	-	1198	1035	1455	1856	1660	1690	523	1111	1134	813	742	884	26.5482645592168	22.9667495012354	27.6506524959343	33.8180851088705	31.718167686025	34.3328645811949	10.602981660527	19.7509232566552	23.2081243111087	19.2846296600349	15.0884881013287
ENSMUSG00000090175	405.567436012698	263.287798576248	247.21196328942	400.098982730291	367.889390678757	341.050625032214	206.348992460207	193.20799384837	131.450185318914	103.785543233494	166.088146267438	264.783321813165	337.517699386605	177.610697156931	0.926280201445914	3.7086129233351e-06	0.000464787591065324	Ugt1a9	1	87998522	88146719	+	2190	protein_coding	UDP glucuronosyltransferase 1 family, polypeptide A9 [Source:MGI Symbol;Acc:MGI:3576092]	-	381	245	267	448	399	349	211	227	134	90	171	232	11.7702851393986	7.57893107699977	7.07353231110274	11.3797244034274	10.6280989195765	9.88397076887127	5.96336601711525	5.62576891750121	3.82308958949337	2.97608928636134	4.8475312703196
ENSMUSG00000023150	4469.75764781448	3871.94260518457	4443.33412668886	4296.59867391837	3976.70912781323	4362.32088866419	2715.78745053078	2403.60957985813	3549.15500361067	2891.00396540411	2583.59338638238	3854.1951627718	4236.77717834729	2999.55742475965	0.498548876595394	3.89693507679105e-06	0.000478621566131477	Ivns1abp	1	151220228	151240173	+	5435	protein_coding	influenza virus NS1A binding protein [Source:MGI Symbol;Acc:MGI:2152389]	-	4199	3603	4799	4811	4313	4464	2777	2824	3618	2507	2660	3377	52.2699938851342	44.9107907464785	51.2295329677949	49.2417698160513	46.292082322592	50.9418576254451	31.6249215595501	28.2010507977104	41.5932451567145	33.4042978464444	30.3844033012366
ENSMUSG00000044676	458.791508980243	361.080409475997	417.57526383344	492.979103721252	413.99081808211	361.572295879424	246.445242179963	269.810282158296	233.471224670906	291.752693756378	240.876375873244	356.087915541843	417.664899995411	273.073955696772	0.615597253907117	4.01377115016692e-06	0.000483305267317158	Zfp612	8	110806378	110819373	+	6083	protein_coding	zinc finger protein 612 [Source:MGI Symbol;Acc:MGI:2443465]	zf-C2H2	431	336	451	552	449	370	252	317	238	253	248	312	4.79364177876513	3.74203158598537	4.30157917124784	5.04799721296443	4.30581465525095	3.77254169001044	2.56410526229618	2.82840497609563	2.44462884799544	3.01196739710711	2.53106027779074
ENSMUSG00000060002	3541.52981526048	3374.38239807926	4419.26105161199	3972.41132853646	3587.61308052893	4002.70303762736	2436.09165980273	1964.42312688122	3051.8024367697	3233.49625807464	2468.98285270075	2893.21431377747	3816.31678527408	2674.66844133442	0.513332434515767	4.37842713536965e-06	0.000513615609605476	Chpt1	10	88288607	88339935	-	8324	protein_coding	choline phosphotransferase 1 [Source:MGI Symbol;Acc:MGI:2384841]	-	3327	3140	4773	4448	3891	4096	2491	2308	3111	2804	2542	2535	27.0412555488057	25.5554518746367	33.2681428767665	29.7255947144858	27.2681683312069	30.5195423285862	18.5222943532825	15.0488696285504	23.3518736070501	24.3945886674626	18.9588547111318
ENSMUSG00000020182	952.710906119066	714.638310421244	598.123326909982	740.361733668329	851.954378413963	690.896251856089	595.576001934911	431.526224145918	410.046100472432	598.496632646482	419.591106359845	504.457880350944	758.114151231446	493.282324318422	0.620770905389883	4.39094927606049e-06	0.000513615609605476	Ddc	11	11764101	11848144	-	4461	protein_coding	dopa decarboxylase [Source:MGI Symbol;Acc:MGI:94876]	-	895	665	646	829	924	707	609	507	418	519	432	442	13.573659018274	10.0989311209518	8.40174487825784	10.3376102069455	12.0827712914308	9.8296336222855	8.44963978565873	6.16844764480526	5.85460838379391	8.42524806040291	6.01201627126319
ENSMUSG00000034853	373.63299223217	459.947664451567	529.607651691192	605.506942614146	358.669105198086	578.515673407079	237.643626387822	314.069382070698	315.872833378285	332.113738347181	250.589132964907	341.250919060933	484.313338265707	298.589938701637	0.699198054904132	4.57785865393069e-06	0.000530426981014875	Acot11	4	106601752	106662195	-	6056	protein_coding	acyl-CoA thioesterase 11 [Source:MGI Symbol;Acc:MGI:1913736]	-	351	428	572	678	389	592	243	369	322	288	258	299	3.92127565460962	4.78788698480402	5.47998484523485	6.22790060208036	3.74705909033498	6.06297783364161	2.48355357369779	3.30704912732405	3.3221848773622	3.44392894960705	2.64485862781291
ENSMUSG00000047731	9060.86618199496	8976.50196533632	8920.00020348416	10115.0024071502	8394.14790160252	11244.8984018501	5691.71154558486	6235.426268428	8365.7252268634	6985.92023231674	5314.82068055803	7572.5747423722	9451.90284356971	6694.36311602054	0.497749456772832	4.91561533759666e-06	0.000551919806061519	Wbp1l	19	46587523	46645828	+	4463	protein_coding	WW domain binding protein 1 like [Source:MGI Symbol;Acc:MGI:107577]	-	8512	8353	9634	11326	9104	11507	5820	7326	8528	6058	5472	6635	129.035987917787	126.79484076944	125.241698933225	141.171658097106	118.99594691118	159.913587546577	80.7140656041274	89.0923007343338	119.391689149001	98.2991910870656	76.1180800860403
ENSMUSG00000055024	834.553464131115	735.056547861851	796.263252542701	1060.08368861798	922.02854806706	1009.4707611985	472.353380844929	491.105781720305	668.041613449106	665.380649396956	641.041968049763	679.07791585704	892.909377069868	602.833551553016	0.568268795194609	5.37594943370578e-06	0.000594841540043013	Ep300	15	81469552	81536278	+	14273	protein_coding	E1A binding protein p300 [Source:MGI Symbol;Acc:MGI:1276116]	-	784	684	860	1187	1000	1033	483	577	681	577	660	595	3.7162670947903	3.24658534555828	3.49584670743165	4.62629474270249	4.08706496744777	4.48885106194544	2.09452230985425	2.19412160702119	2.98116241963718	2.92757553494538	2.8707626914761
ENSMUSG00000040128	1689.3320759899	1276.67716207585	1805.48063076543	1605.75439943987	1799.7997258269	1820.56537087397	1233.20416821005	1409.48210490264	985.876389891852	1254.65190042268	1182.0425380554	1053.42675014462	1666.26822749532	1186.44730860454	0.489815231171218	5.56066239961788e-06	0.000609786210643811	Pnrc1	4	33245423	33290163	-	2095	protein_coding	proline-rich nuclear receptor coactivator 1 [Source:MGI Symbol;Acc:MGI:1917838]	-	1587	1188	1950	1798	1952	1863	1261	1656	1005	1088	1217	923	51.2506080726315	38.4165536245713	54.0032353375064	47.7423184510565	54.3528840111244	55.1542480293121	37.2549671621787	42.9018926686501	29.9733873543812	37.6090557645128	36.0641063171682
ENSMUSG00000040612	2829.39171895472	1962.30008244991	2720.25748368658	2592.60568496883	2850.91227062335	3097.7950755075	1494.31877004359	1605.24350836134	1193.84235472476	2064.17913764394	1574.43792455858	2370.49551468079	2675.54371936515	1717.08620166883	0.640451894120495	5.80610043481119e-06	0.00062478758636345	Ildr2	1	166081708	166144392	+	8251	protein_coding	immunoglobulin-like domain containing receptor 2 [Source:MGI Symbol;Acc:MGI:1196370]	-	2658	1826	2938	2903	3092	3170	1528	1886	1217	1790	1621	2077	21.7948815246262	14.992711157365	20.6592427869342	19.5721391117899	21.8604805772562	23.8288352887798	11.46225042973	12.4060991623025	9.21590062046339	15.7106446511064	12.1967761017958
ENSMUSG00000036885	1034.67597848909	1406.70909525024	1750.85326809099	1480.72346733666	1248.4266540828	1753.13702380456	708.041092612275	627.287627604618	891.703122797705	1193.53374718518	677.950444998082	1123.04650286273	1445.75424784239	870.2604230101	0.733528709828433	6.19116939685753e-06	0.000644406292645798	Arhgef26	3	62245765	62369642	+	10116	protein_coding	Rho guanine nucleotide exchange factor (GEF) 26 [Source:MGI Symbol;Acc:MGI:1918053]	-	972	1309	1891	1658	1354	1794	724	737	909	1035	698	984	6.50075153690551	8.76630978919877	10.8455580526739	9.11745336757294	7.80794329691946	10.9992673511585	4.42978727429929	3.95420165982727	5.61447114715594	7.40933260943163	4.28366229540601
ENSMUSG00000000555	700.4288002529	565.262783882067	558.310164282847	596.576161749631	669.392725896686	656.693467110738	378.469479062086	508.979648992621	438.494274907122	500.47695292596	443.872999089002	410.870671779049	624.444017195812	446.860671125974	0.482256794190809	6.42011414140614e-06	0.000662620520039917	Itga5	15	103252713	103275190	-	4933	protein_coding	integrin alpha 5 (fibronectin receptor alpha) [Source:MGI Symbol;Acc:MGI:96604]	-	658	526	603	668	726	672	387	598	447	434	457	360	9.02445328641391	7.22371522469592	7.09210883826264	7.53291717236955	8.58523746838787	8.44905812450299	4.85571261586365	6.57945946139764	5.66174362100315	6.37127243533347	5.75140179134196
ENSMUSG00000089704	1272.05534392434	1039.18082131931	1280.50241658902	1436.06956301408	1196.79305539104	1502.96808395285	948.61859093081	841.774034872412	1021.19136505216	1034.39591422716	694.462132053909	874.241484952088	1287.92821403177	902.447253681422	0.513828786720502	6.53246184590805e-06	0.000668597469928689	Galnt2	8	124958130	125072463	+	4282	protein_coding	polypeptide N-acetylgalactosaminyltransferase 2 [Source:MGI Symbol;Acc:MGI:894694]	-	1195	967	1383	1608	1298	1538	970	989	1041	897	715	766	18.8811031737954	15.2990970361882	18.7389266959318	20.889941637522	17.6829547893358	22.2771594179992	14.0209744197112	12.5357342138128	15.1900029544555	15.1702711007494	10.3664009543963
ENSMUSG00000031766	10.6448145935091	2.14928815164284	20.3695250650458	17.8615617290309	4.6101427403353	19.5444484259148	0	0	0	2.30634540518876	0	0	12.5299634509131	0.384390900864793	5.12054565486693	7.05200676222304e-06	1	Slc12a3	8	95055829	95092842	+	11119	protein_coding	solute carrier family 12, member 3 [Source:MGI Symbol;Acc:MGI:108114]	-	10	2	22	20	5	20	0	0	0	2	0	0	0.0608471712374364	0.0121856935883821	0.114795838802404	0.100060371418236	0.0262319805200027	0.11156151559582	0	0	0	0.0130260225982179	0
ENSMUSG00000096105	83.0295538293712	122.509424643642	101.847625325229	143.785571918698	82.0605407779683	120.198357819376	60.6333532347528	26.3852326400857	60.8202349983033	54.1991170219358	47.592509749149	59.3479859236405	108.905179052381	51.4964055946445	1.08620917273303	7.36836482793048e-06	0.000737589605373498	Bhmt-ps1	4	26368984	26370207	-	1224	processed_pseudogene	betaine-homocysteine methyltransferase, pseudogene 1 [Source:MGI Symbol;Acc:MGI:1888909]	-	78	114	110	161	89	123	62	31	62	47	49	52	4.31140983375378	6.30971032640977	5.2141132828592	7.31715581853344	4.24165552855719	6.23266570690033	3.13518662223116	1.37461292436569	3.1649296682117	2.78076316489808	2.48532555812596
ENSMUSG00000090213	471.565286492454	385.79722321989	424.982363857093	440.287496620611	528.322358042425	365.481185564607	309.034510035192	258.745507180195	340.397121684052	305.59076618751	301.095469841555	289.892085088551	436.072652299513	300.792576669509	0.536806699606603	7.38670586719918e-06	0.000737589605373498	Peds1	2	167484528	167531742	-	3265	protein_coding	plasmanylethanolamine desaturase 1 [Source:MGI Symbol;Acc:MGI:2142624]	-	443	359	459	493	573	374	316	304	347	265	310	254	9.17966143234767	7.44898759514703	8.15640336383914	8.39965751931225	10.2376020381804	7.10458241920842	5.99041655136619	5.05347992594748	6.64048929565884	5.87773836086372	5.89450217067422
ENSMUSG00000032777	1648.88178053456	1395.96265449202	1533.26970489618	1492.33348246053	1687.31224296272	1506.87697363803	1134.43047987602	1121.79795547203	1194.82332625699	1389.57310662623	1220.89356642205	1124.18781028434	1544.10613983067	1197.61770748961	0.367222983990902	7.46788596199284e-06	0.000739118039349286	Gtf3c1	7	125240126	125306952	-	12018	protein_coding	general transcription factor III C 1 [Source:MGI Symbol;Acc:MGI:107887]	-	1549	1299	1656	1671	1830	1542	1160	1318	1218	1205	1257	985	8.72017782190087	7.32256000936002	7.99461083678404	7.73467545279892	8.88271436620895	7.95797030506363	5.97418841322518	5.95228006699709	6.33240787624931	7.26109985229865	6.49339319815302
ENSMUSG00000030935	1783.00644441278	1852.68638671613	2320.27408240931	2350.58152354046	2022.00860591106	2458.69161198009	1196.04179042101	1269.04457633445	1531.29656181212	1622.51399255029	1364.64237137866	1891.14639760524	2131.20810916164	1479.11428168363	0.527803003649598	7.62684729162422e-06	0.00074343601933118	Acsm3	7	119360146	119386736	+	4936	protein_coding	acyl-CoA synthetase medium-chain family member 3 [Source:MGI Symbol;Acc:MGI:99538]	-	1675	1724	2506	2632	2193	2516	1223	1491	1561	1407	1405	1657	22.9586201875338	23.6618173990981	29.4560908602816	29.6625565448941	25.9173317400482	31.6144496519991	15.3357292195659	16.394668486698	19.7597544687616	20.6427003438317	17.671352780159
ENSMUSG00000053436	2976.29016034515	2827.38856348615	3185.0530101708	3470.5014439507	3392.14302833871	3733.96687177103	2119.23349128563	2367.01070877672	2427.90454227098	2621.16155299702	2110.58211601839	2902.34477315034	3264.22384634376	2424.70619741651	0.429451434032854	7.91081079438068e-06	0.000765043922650264	Mapk14	17	28910303	28967380	+	4376	protein_coding	mitogen-activated protein kinase 14 [Source:MGI Symbol;Acc:MGI:1346865]	-	2796	2631	3440	3886	3679	3821	2167	2781	2475	2273	2173	2543	43.2280830160283	40.7314173630323	45.608976284435	49.3995881448852	49.0432544317929	54.1564096388003	30.650299575024	34.492432448377	35.3387905322305	37.6157464348454	30.82840364827
ENSMUSG00000017707	4683.71842114401	4645.686339776	5195.15477908965	5810.36603045374	4853.558277025	6633.38579575549	3557.80869464566	3677.76097541324	4817.55119478496	3501.03232507653	3494.65000158037	3927.23883775475	5303.64494054065	3829.34033820925	0.469940546035729	8.42310362417709e-06	0.000804738897709455	Serinc3	2	163465192	163487051	-	3840	protein_coding	serine incorporator 3 [Source:MGI Symbol;Acc:MGI:1349457]	-	4400	4323	5611	6506	5264	6788	3638	4321	4911	3036	3598	3441	77.5224652799959	76.2675857891745	84.7770381327428	94.2498526212852	79.9671214760237	109.637910352663	58.6387354350328	61.0735533781029	79.9084122610857	57.2556177393829	58.1699323042089
ENSMUSG00000102758	273.571735053184	209.555594785177	326.83828854369	329.545813900619	254.479879266509	332.255623240552	133.002194192361	159.162532377291	152.050587495758	214.490122682554	167.059421976605	217.989717527218	287.707822464955	173.959096041965	0.729978096399835	9.28377315160859e-06	0.000873284799491825	Naaladl2	3	23852266	25198425	-	10411	protein_coding	N-acetylated alpha-linked acidic dipeptidase-like 2 [Source:MGI Symbol;Acc:MGI:2685867]	-	257	195	353	369	276	340	136	187	155	186	172	191	1.67011662785695	1.26890220760724	1.96721330965634	1.97165881546426	1.54647691916103	2.02552034986731	0.808536420664074	0.974875838620482	0.930235787602325	1.29380271924613	1.025662846991
ENSMUSG00000034917	435.372916874523	380.424002840782	487.942714058144	426.891325323838	513.569901273352	507.17843665249	337.395272032092	293.642105188051	360.016552328666	321.735184023832	267.100820020734	341.250919060933	458.563216170522	320.190142109051	0.51974444772176	9.36134148756339e-06	0.000873284799491825	Tjp3	10	81109041	81127415	-	3714	protein_coding	tight junction protein 3 [Source:MGI Symbol;Acc:MGI:1351650]	-	409	354	527	478	557	519	345	345	367	279	275	299	7.45053624309433	6.45724627911471	8.23261698947903	7.15951894135836	8.74863107220592	8.66713574718966	5.74950321727628	5.04170397711485	6.17416109228395	5.44013736271059	4.59684032214126
ENSMUSG00000028991	1332.73078710734	1247.66177202867	1486.97532974835	1512.87427844891	1366.44630823538	1273.32081494835	934.927188587479	737.084240848846	1109.47880295292	1123.19021232692	1057.71924728211	995.220071642586	1370.0015484195	992.936627273477	0.465520069140429	9.3855718557988e-06	0.000873284799491825	Mtor	4	148533068	148642140	+	10109	protein_coding	mechanistic target of rapamycin kinase [Source:MGI Symbol;Acc:MGI:1928394]	-	1252	1161	1606	1694	1482	1303	956	866	1131	974	1089	872	8.37919418963594	7.78054486386907	9.21735977940519	9.32187026926567	8.55198270961778	7.99440892748355	5.85332746432285	4.64953843754954	6.99049935798323	6.97747553133723	6.68787745845022
ENSMUSG00000025277	1316.76356521708	1423.90340046338	1527.71437987844	1669.16294357793	1304.67039551489	1435.53973688344	673.812586753947	966.891105778625	1319.40671085029	1101.27993097763	776.049291623879	918.752474394818	1446.29240358919	959.365350063198	0.592529880929444	9.94067106913031e-06	0.000911129269187003	Abhd6	14	14413010	14466871	-	2226	protein_coding	abhydrolase domain containing 6 [Source:MGI Symbol;Acc:MGI:1913332]	-	1237	1325	1650	1869	1415	1469	689	1136	1345	955	799	805	37.5967810051869	40.3252163717918	43.0058939233131	46.7070014208226	37.0815677298924	40.9304741827419	19.1578684842328	27.6983129766282	37.752952019995	31.068892572429	22.2838508538588
ENSMUSG00000042350	991.032238655699	888.730650704314	1044.40110333508	1023.46748707347	1107.35628622854	1195.14302124469	837.131457563684	737.084240848846	815.187343283711	847.581936406868	778.963118751378	741.849824045506	1041.6884645403	792.966320149999	0.394293125112194	1.00288082605613e-05	0.000912398689305291	Arel1	12	84964922	85017674	-	6044	protein_coding	apoptosis resistant E3 ubiquitin protein ligase 1 [Source:MGI Symbol;Acc:MGI:1915747]	-	931	827	1128	1146	1201	1223	856	866	831	735	802	650	10.4215267686435	9.26972908972744	10.8281394237287	10.5477057841668	11.5916526496921	12.5502431966068	8.76601954570506	7.77666844228793	8.59073574017292	8.80664409109408	8.23793832805425
ENSMUSG00000044367	108.577108853793	97.7926108997491	126.846587905058	144.67865000515	160.432967363668	129.970582032334	37.1623777890421	16.1715941987622	68.6680072561489	64.5776713452852	47.592509749149	84.4567491990268	128.049751176625	53.1048182562357	1.27884313908907	1.04691592232108e-05	0.000938556303499816	Slc16a13	11	70107615	70111890	-	2601	protein_coding	solute carrier family 16 (monocarboxylic acid transporters), member 13 [Source:MGI Symbol;Acc:MGI:1916559]	-	102	91	137	162	174	133	38	19	70	56	49	74	2.65317528231002	2.37021110300635	3.05597227701267	3.46475481944441	3.90243522521587	3.17147599815493	0.90426635024504	0.396472797919514	1.68155655996067	1.55917634277139	1.16956496852987
ENSMUSG00000028132	4475.08005511124	3813.91182509022	4408.15040157651	4833.33860387575	4194.30786515706	5514.46612337187	2911.37891257837	2712.57214270817	3810.09343118403	3802.01040045367	2832.23996792895	3495.82463238674	4539.87581236377	3260.68658120666	0.477803206981993	1.10322110587299e-05	0.00098186678422696	Tlcd4	3	120995410	121076747	-	7874	protein_coding	TLC domain containing 4 [Source:MGI Symbol;Acc:MGI:1923195]	-	4204	3549	4761	5412	4549	5643	2977	3187	3884	3297	2916	3063	36.1221357142747	30.534905267699	35.0810001244416	38.2349232420256	33.7013527428826	44.4492850638028	23.4011149455615	21.9678118319295	30.8203525722736	30.3229254733187	22.9911520137426
ENSMUSG00000039457	944.195054444259	823.177362079207	604.604539430679	1051.15290775347	729.324581521044	903.930739698561	333.483442791141	656.226269855035	532.667542001269	397.844582395061	624.530280993935	542.121025264023	842.730864154536	514.478857216744	0.711067543304991	1.16022235652997e-05	0.00102516913546051	Ppl	16	4904155	4950285	-	6893	protein_coding	periplakin [Source:MGI Symbol;Acc:MGI:1194898]	-	887	766	653	1177	791	925	341	771	543	345	643	475	8.70605616174803	7.52846575432053	5.49634642762413	9.4987406394448	6.69414340922417	8.32307090538717	3.06195797778328	6.07080448690628	4.92204231324644	3.62458574771558	5.79123673132753
ENSMUSG00000063415	160.736700361988	190.212001420391	240.730750768724	137.534025313538	307.957535054398	376.230632198861	91.9279871623672	114.052295928112	125.564356125529	106.091888638683	163.17431913994	70.7610601397251	235.566940852983	111.928651189059	1.07213384320172	1.19512144971751e-05	0.00104846297467361	Cyp26b1	6	84548396	84570890	-	5352	protein_coding	cytochrome P450, family 26, subfamily b, polypeptide 1 [Source:MGI Symbol;Acc:MGI:2176159]	-	151	177	260	154	334	385	94	134	128	92	168	62	1.90882874150499	2.24049072128475	2.81855451001684	1.60067241731225	3.64046759074133	4.4616424643621	1.08708843244439	1.35890419862796	1.49433392695544	1.24485648026923	1.94877545364906
ENSMUSG00000035049	163.93014474004	166.56983175232	177.770400567673	187.546398154824	170.575281392406	185.672260046191	103.663474885223	78.3045613834802	77.4967510462252	131.461688095759	104.897776589961	132.391660906583	175.344052775576	104.702652151205	0.750541392637881	1.28906485241744e-05	0.00111424841504345	Rrp12	19	41851290	41884612	-	4340	protein_coding	ribosomal RNA processing 12 homolog [Source:MGI Symbol;Acc:MGI:2147437]	-	154	155	192	210	185	190	106	92	79	114	108	116	2.40069569899342	2.41951298230751	2.56673300037322	2.69170468499848	2.48661647047711	2.71527619196872	1.51171269925212	1.15053078777294	1.13734220007952	1.90222849778027	1.54490809827794
ENSMUSG00000021474	2834.71412625148	3295.93338054429	3247.0874728689	3640.18628037649	2849.06821352722	3519.95516150726	1965.69419357828	2372.11752799738	2837.95064274341	2329.40885924064	2276.67026228582	2656.96367750452	3231.15743917927	2406.46752722501	0.425307723687986	1.30200998771515e-05	0.00111424841504345	Sfxn1	13	54225888	54262361	+	9841	protein_coding	sideroflexin 1 [Source:MGI Symbol;Acc:MGI:2137677]	-	2663	3067	3507	4076	3090	3602	2010	2787	2893	2020	2344	2328	18.3078800231872	21.1135145685032	20.6759621863783	23.0405471786517	18.316650328867	22.7015032814731	12.6418301567143	15.3708499776562	18.3680474920379	14.8648215346287	14.7872358344507
ENSMUSG00000051671	774.942502407464	845.744887671457	803.670352566354	763.581763916069	729.324581521044	641.057908370007	337.395272032092	304.706880166151	500.295481437656	601.956150754266	338.975222499041	652.827845160045	759.720332742066	456.026142008209	0.738415078832988	1.30910908353919e-05	0.00111424841504345	Coa6	8	127149254	127152172	+	747	protein_coding	cytochrome c oxidase assembly factor 6 [Source:MGI Symbol;Acc:MGI:1915142]	-	728	787	868	855	791	656	345	358	510	522	349	572	65.9351351282506	71.3740134914702	67.4168285668087	63.6712473680363	61.7707235873925	54.4669902739563	28.5858834658154	26.0113307662326	42.6582825081934	50.6054700339515	29.0050386749178
ENSMUSG00000030042	658.914023338215	573.859936488638	612.937526957288	726.965562371556	603.006670435857	628.354016893162	389.227009474704	397.48076267484	498.333538373195	485.485707792233	405.993246431516	544.40364010724	634.006289414119	453.487317475621	0.485524304720609	1.33044027420224e-05	0.00111921009916109	Pole4	6	82595973	82682346	-	2509	protein_coding	polymerase (DNA-directed), epsilon 4 (p12 subunit) [Source:MGI Symbol;Acc:MGI:1914229]	-	619	534	662	814	654	643	398	467	508	421	418	477	16.6915285945088	14.4187158674619	15.3082844441517	18.0476885933975	15.2056116362574	15.8949970565579	9.81828278451223	10.1022093941915	12.6507665838895	12.1514749618365	10.3429456890305
ENSMUSG00000051495	2559.01342827959	1590.4732322157	2580.44847074013	2305.92761921788	1905.83300885461	2476.28161556341	1153.01166877054	1819.72991562914	1455.76175383036	1187.76788367221	1101.42665419459	1879.73332338915	2236.32956247855	1432.90519991433	0.642187894087736	1.34810374353515e-05	0.00112435023702416	Irf2bp2	8	127315035	127320725	-	5080	protein_coding	interferon regulatory factor 2 binding protein 2 [Source:MGI Symbol;Acc:MGI:2443921]	-	2404	1480	2787	2582	2067	2534	1179	2138	1484	1030	1134	1647	32.0167226685372	19.7371295249652	31.8304260423375	28.2742029391927	23.7357834656594	30.9380572293281	14.3649202241405	22.8425263978134	18.2525682252172	14.683212168078	13.8585555193949
ENSMUSG00000020300	1325.27941689189	918.820684827313	1231.43037893232	1565.56588554956	1371.05645097572	1422.8358454066	905.588469280341	886.884271321591	933.884898683625	1035.54908692975	978.074639130471	817.176113871665	1305.8314437639	926.192913202907	0.496110655291099	1.35569014961371e-05	0.00112435023702416	Cpeb4	11	31822211	31885634	+	6369	protein_coding	cytoplasmic polyadenylation element binding protein 4 [Source:MGI Symbol;Acc:MGI:1914829]	-	1245	855	1330	1753	1487	1456	926	1042	952	898	1007	716	13.2252602096306	9.09454243938479	12.1157300210282	15.3111747209789	13.6196681744274	14.1788257828611	8.99897123191398	8.87966572277711	9.33941107386166	10.210632599473	9.81582586741328
ENSMUSG00000039395	989.967757196348	722.160818951994	771.264289962872	935.945834601217	1036.36008802738	881.454624008759	370.645820580183	445.995545271126	491.46673764758	896.015189915832	423.47620919651	558.099329166542	889.525568791428	530.949805296295	0.746145013716317	1.36401388468164e-05	0.00112435023702416	Mreg	1	72198601	72251466	-	2284	protein_coding	melanoregulin [Source:MGI Symbol;Acc:MGI:2151839]	-	930	672	833	1048	1124	902	379	524	501	777	436	489	27.548183809099	19.932380155472	21.1601185730655	25.5248399901432	28.7076087509411	24.4940487675733	10.2706099465182	12.4518916865991	13.7055168553998	24.6361296572828	11.8511095701395
ENSMUSG00000027792	4323.92368788341	3589.31121324354	4055.38726295004	4552.01900664352	4142.6742664653	4068.17693985417	3233.12686764666	2906.63127309331	3585.4509503032	3314.21834725624	3291.65337836461	3387.40042733394	4121.91539617333	3286.41354066633	0.327110738287963	1.41393314769537e-05	0.00115772846133297	Bche	3	73543141	73615748	-	6741	protein_coding	butyrylcholinesterase [Source:MGI Symbol;Acc:MGI:894278]	-	4062	3340	4380	5097	4493	4163	3306	3415	3655	2874	3389	2968	40.7682167211028	33.5666598583887	37.6980580207983	42.0618288248583	38.8811318074108	38.3029500357587	30.3550985904019	27.4958106116714	33.8779284093775	30.8752155692618	31.2115879960352
ENSMUSG00000009293	662.107467716267	623.293563976423	574.05025183311	695.707829345752	640.809840906607	686.987362170906	408.786155679463	350.668253152107	522.857826678962	463.57542644294	277.784852821564	523.860106518288	647.159385991511	424.588770215554	0.609631208737649	1.44150904031983e-05	0.0011724909955767	Ube2g2	10	77458109	77481827	+	2431	protein_coding	ubiquitin-conjugating enzyme E2G 2 [Source:MGI Symbol;Acc:MGI:1343188]	-	622	580	620	779	695	703	418	412	533	402	286	459	17.3105771915752	16.1632623746088	14.7970767289787	17.825853952565	16.6773350081717	17.9357898357193	10.6425193528839	9.19840238853681	13.6992263644588	11.975362155157	7.30381388510487
ENSMUSG00000055116	63.8688875610547	26.8661018955355	50.9238126626146	91.987042904509	69.1521411050295	101.631131814757	20.5371035149969	28.0875057136396	26.4862313702289	36.9015264830201	14.5691356374946	10.2717667944762	67.4048529905834	22.8088782523094	1.5644387655572	1.49437041741785e-05	0.00120749062281093	Arntl	7	112806672	112913333	+	7523	protein_coding	aryl hydrocarbon receptor nuclear translocator-like [Source:MGI Symbol;Acc:MGI:1096381]	bHLH	60	25	55	103	75	104	21	33	27	32	15	9	0.539593005707076	0.225130810529743	0.424170853264633	0.761629940112556	0.581563321949841	0.85741764694026	0.172775181781954	0.238080060892741	0.224246923788683	0.308039548625996	0.123785228014206
ENSMUSG00000025372	1978.87103293335	1812.92455591073	2204.53814453973	2038.00419328242	1643.0548726555	2025.78207934607	605.35557503729	592.391029596763	1013.34359279431	1424.16828770406	783.81949729721	1388.97113209751	1950.52914644463	968.008185754523	1.01142614794107	1.54818755128414e-05	0.00124279996763868	Baiap2	11	119833589	119897608	+	4992	protein_coding	brain-specific angiogenesis inhibitor 1-associated protein 2 [Source:MGI Symbol;Acc:MGI:2137336]	-	1859	1687	2381	2282	1782	2073	619	696	1033	1235	807	1217	25.1948012159987	22.8942538526197	27.6728579567691	25.4295636787076	20.8237974149921	25.7557894203652	7.6748376610744	7.56719298438033	12.9294346859799	17.9159541674617	10.0361601251757
ENSMUSG00000003226	1390.21278591229	1168.13811041788	1426.79264205617	1653.98061610826	1373.82253661992	1687.66312157775	822.462097910115	823.049031063319	890.722151265475	1173.92981124108	793.532254388873	1326.19922390904	1450.10163544871	971.649094962983	0.578939780049851	1.66769895043834e-05	0.00132146312963121	Ranbp2	10	58282742	58330178	+	11728	protein_coding	RAN binding protein 2 [Source:MGI Symbol;Acc:MGI:894323]	-	1306	1087	1541	1852	1490	1727	841	967	908	1018	817	1162	7.53399526149135	6.27901578525847	7.62338540890216	8.78445596720854	7.41120997934595	9.13310646968123	4.43838696741572	4.47509916764572	4.8374410204049	6.28595666287678	4.32480691721613
ENSMUSG00000022807	609.947876208073	459.947664451567	545.347739241455	771.619466694133	496.051358860078	815.003499360649	337.395272032092	300.451197482266	433.589417245969	479.719844279261	299.152918423223	432.55551278961	616.319600802659	380.477360375404	0.697740453791323	1.96876826953758e-05	0.00152078062178997	Osbpl11	16	33005441	33063682	+	5091	protein_coding	oxysterol binding protein-like 11 [Source:MGI Symbol;Acc:MGI:2146553]	-	573	428	589	864	538	834	345	353	442	416	308	379	7.61478503977074	5.69543185621158	6.7124550877509	9.44079333241658	6.16461538299853	10.1604535283134	4.19439303652801	3.76332525745326	5.42466550693468	5.9174935800577	3.7559192204291
ENSMUSG00000041235	596.109617236511	568.486716109531	518.497001655712	783.229481818003	587.332185118717	838.456837471746	415.631856851128	333.645522416568	415.931929665816	470.494462658506	470.097443236493	488.479576448425	648.68530656837	432.380131879489	0.586816637686374	1.98719348902237e-05	0.00152541940201079	Chd7	4	8690406	8867659	+	13786	protein_coding	chromodomain helicase DNA binding protein 7 [Source:MGI Symbol;Acc:MGI:2444748]	-	560	529	560	877	637	858	425	392	424	408	484	428	2.74824771735	2.59958119062373	2.35677947891999	3.53882563330207	2.69542942583805	3.86010531720118	1.90811164304677	1.54329141301379	1.92168134513489	2.14323331169269	2.17959453962871
ENSMUSG00000026131	2051.25577216921	1829.04421704806	1845.29379339256	2214.83365439983	2232.23111487035	2423.51160481344	1007.29602954509	1267.34230326089	1239.9480167396	1815.09383388355	1487.02311073362	1771.30911833635	2099.36169278224	1431.33540208318	0.553351622392659	2.02450183393103e-05	0.00153722033366466	Dst	1	33947306	34347742	+	41619	protein_coding	dystonin [Source:MGI Symbol;Acc:MGI:104627]	-	1927	1702	1993	2480	2421	2480	1030	1489	1264	1574	1531	1552	3.13253690885872	2.77047287740807	2.77833655385364	3.31480423496773	3.39336015081585	3.69581462785819	1.53178816374162	1.9417942183058	1.89761989412341	2.73880207903034	2.28376899958702
ENSMUSG00000045775	2232.21762025886	1872.02998008091	1920.29068113205	1969.23718062565	2360.39308305167	1841.08704172118	1210.71115007458	1275.00253209188	1725.5289251938	1723.9931903786	1242.26163202371	1604.67823478151	2032.54259781172	1463.69594409068	0.474279349298585	2.02759887684152e-05	0.00153722033366466	Slc16a5	11	115353300	115365224	+	3699	protein_coding	solute carrier family 16 (monocarboxylic acid transporters), member 5 [Source:MGI Symbol;Acc:MGI:2443515]	-	2097	1742	2074	2205	2560	1884	1238	1498	1759	1495	1279	1406	38.3548441358759	31.9043431265291	32.5307155279009	33.1605792093486	40.372202324352	31.5897877096281	20.7152147088853	21.9799970061355	29.7122335353691	29.2687667177656	21.4661834690234
ENSMUSG00000016024	3527.69155628892	3046.61595495372	3851.69201229958	3307.96123221652	3618.96205116321	3356.75901715087	2449.78306214606	2281.04591856225	3401.02830224383	2202.55986195526	2093.09915325339	2607.88745837535	3451.61363734547	2505.90062608936	0.461996767544696	2.0731470945434e-05	0.00155258491555988	Lbp	2	158148413	158174772	+	4831	protein_coding	lipopolysaccharide binding protein [Source:MGI Symbol;Acc:MGI:1098776]	-	3314	2835	4160	3704	3925	3435	2505	2680	3467	1910	2155	2285	46.4110709133043	39.7559388399027	49.9603518529832	42.6512521562499	47.3946620265989	44.1001274033386	32.0939977903306	30.1091089673229	44.8405154194367	28.6314861793529	27.6935646533654
ENSMUSG00000038708	1665.91348388418	1578.65214738166	1523.08494236365	1703.99298894954	1678.09195748205	1606.5536606102	1177.46060152649	1066.47408058153	1182.07069633799	1492.20547715713	1281.11266039036	1349.02537234121	1626.04819677855	1258.05814805578	0.371308225109757	2.12680482278119e-05	0.00158311617172112	Golga4	9	118335335	118411587	+	13602	protein_coding	golgi autoantigen, golgin subfamily a, 4 [Source:MGI Symbol;Acc:MGI:1859646]	-	1565	1469	1645	1908	1820	1644	1204	1253	1205	1294	1319	1182	7.78426647395877	7.31652756861288	7.01669060216502	7.80321269951919	7.80540468095098	7.49633839398583	5.478691445323	4.99975182240223	5.53526054783073	6.88936298995895	6.0201962485556
ENSMUSG00000026510	700.4288002529	767.295870136493	666.639002128773	855.568806820579	528.322358042425	758.324598925496	303.166766173764	488.552372109974	569.944460226036	432.439763472892	325.377362570713	558.099329166542	712.763239384444	446.263342286653	0.675840351024317	2.26059938630404e-05	0.00165265962277299	Trp53bp2	1	182236737	182289997	+	4418	protein_coding	transformation related protein 53 binding protein 2 [Source:MGI Symbol;Acc:MGI:2138319]	-	658	714	720	958	573	776	310	574	581	375	335	489	10.0764210189859	10.9485974518542	9.4553145271784	12.0625087875486	7.56581499652759	10.8939693721378	4.34299278588834	7.05157822068916	8.21682831222251	6.14685711590024	4.70747171521868
ENSMUSG00000002831	4582.59268250568	2102.0038123067	3347.08332318821	2862.3152670772	2144.63840280398	2857.39835986875	163.318870809737	215.337543804571	857.369119169631	1063.22523179202	94.2137437891318	965.546078680766	2982.67197462509	559.835098007642	2.41385323577985	2.35769024581081e-05	0.00170336185876755	Plin4	17	56407591	56416803	-	6350	protein_coding	perilipin 4 [Source:MGI Symbol;Acc:MGI:1929709]	-	4305	1956	3615	3205	2326	2924	167	253	874	922	97	846	45.8675511108328	20.8680137031524	33.0296347737496	28.0770938559605	21.3679467212864	28.5597093412961	1.62778061233687	2.16245432316063	8.5998623336064	10.5148905778392	0.948345598152593
ENSMUSG00000029571	5186.15366995764	4503.83332176757	5267.37400432026	5436.16631223054	5329.32500782761	5575.05391349221	3885.42439357537	3613.07459861819	4639.01437591897	4548.11313903223	3996.79954321935	4056.2065763965	5216.31770493264	4123.10543779344	0.339592810787363	2.39782431178433e-05	0.0017156138151359	Tmem106b	6	13069758	13089268	+	6931	protein_coding	transmembrane protein 106B [Source:MGI Symbol;Acc:MGI:1919150]	-	4872	4191	5689	6087	5780	5705	3973	4245	4729	3944	4115	3554	47.5573343490215	40.9645086492312	47.6221753788797	48.8545759577894	48.6473006002897	51.0516625764398	35.4793612031785	33.2416017865186	42.6311655879641	41.2086672733548	36.8589164862582
ENSMUSG00000051469	513.08006340714	464.246240754853	444.426001419182	496.551416067058	465.624416773865	583.401785513558	344.240973203758	233.211411076887	405.141242811279	400.150927800249	281.669955658229	315.000848363938	494.554987322609	329.902559819057	0.585781171591769	2.40258570431017e-05	0.0017156138151359	Zfp24	18	24142759	24153867	-	6271	protein_coding	zinc finger protein 24 [Source:MGI Symbol;Acc:MGI:1929704]	zf-C2H2	482	432	480	556	505	597	352	274	413	347	290	276	5.2001558594917	4.66694770116275	4.44092697401522	4.9321450008647	4.69765787459623	5.9045617738018	3.47423337795343	2.37144965366467	4.11497349920276	4.00719277695313	2.87097771117581
ENSMUSG00000028542	623.786135179635	620.069631748959	921.258065441846	1054.72522009927	768.049780539861	1044.65076836515	206.348992460207	311.515972460367	609.183321515264	514.315025357093	306.923124096553	368.642297179536	838.75660022912	386.154788844837	1.11974835326062	2.45395031261484e-05	0.00173215044480089	Slc6a9	4	117691703	117732395	+	5141	protein_coding	solute carrier family 6 (neurotransmitter transporter, glycine), member 9 [Source:MGI Symbol;Acc:MGI:95760]	-	586	577	995	1181	833	1069	211	366	621	446	316	323	7.71180669977799	7.60351132895547	11.2290928275867	12.7790961839434	9.45201069977791	12.8967488217439	2.54031736578144	3.86396895488538	7.54740730912897	6.2825335528336	3.81599768437885
ENSMUSG00000030102	1423.21171115217	1316.43899288124	1293.46484163041	2044.25573988758	1453.11699175369	1842.06426414247	684.570117166564	811.984256085219	929.961012554702	1435.70001473	945.051265018817	1137.88349934364	1562.09209024126	990.858360816491	0.657752351878271	2.5398742978408e-05	0.00177242818898186	Itpr1	6	108190057	108528070	+	18319	protein_coding	inositol 1,4,5-trisphosphate receptor 1 [Source:MGI Symbol;Acc:MGI:96623]	-	1337	1225	1397	2289	1576	1885	700	954	948	1245	973	997	4.93782583587732	4.53023065086236	4.42449632400184	6.95091335927387	5.01858469184356	6.38204308982531	2.36509942781746	2.8264854810185	3.23340694252643	4.92170014358408	3.29746125535017
ENSMUSG00000091680	8.5158516748073	13.9703729856785	14.8142000473061	36.6162015445133	17.5185424132741	25.4077829536893	0	0	3.9238861289228	6.91903621556627	0	2.28261484321694	19.4738252698781	2.18758953128433	3.21366282183887	2.55813408940959e-05	1	Klhdc7b	15	89269120	89273070	+	3951	protein_coding	kelch domain containing 7B [Source:MGI Symbol;Acc:MGI:3648212]	-	8	13	16	41	19	26	0	0	4	6	0	2	0.136990067727473	0.222906283361157	0.234953624011216	0.577264262993852	0.280526167382247	0.408146858892153	0	0	0.0632567322913941	0.109974445914643	0
ENSMUSG00000010175	3347.79418965862	2895.0911402629	3830.39659973157	4088.51147977517	3889.11641574686	4252.87197747907	2951.47516229813	1972.08335571221	2229.74829276038	2956.73480945199	2347.57338905496	3186.53032113085	3717.29696710903	2607.35755506809	0.512182629397599	2.77171673241495e-05	0.00192328954279777	Prox1	1	189850232	189902911	-	8390	protein_coding	prospero homeobox 1 [Source:MGI Symbol;Acc:MGI:97772]	HPD	3145	2694	4137	4578	4218	4352	3018	2317	2273	2564	2417	2792	25.3609087846314	21.7531231563075	28.6083463658628	30.3537024621068	29.3272554215317	32.1719263694396	22.2643694653655	14.9887087177688	16.9274393599802	22.1311316609784	17.8847681004216
ENSMUSG00000030207	1321.02149105448	1495.90455354342	1479.56822972469	1394.09489295086	1291.76199584195	1561.6014292306	915.36804238272	787.301296518687	945.656557070394	1318.07639906537	880.94706821384	1208.64455948337	1423.99209872433	1009.33232045573	0.497837711746054	2.82662883527568e-05	0.00195037389634022	Fam234b	6	135174975	135221953	+	6912	protein_coding	family with sequence similarity 234, member B [Source:MGI Symbol;Acc:MGI:1921775]	-	1241	1392	1598	1561	1401	1598	936	925	964	1143	907	1059	12.1471438652115	13.6433648724562	13.4135039244463	12.5631058460418	11.8239126549212	14.3391426654518	8.38156746185185	7.26336970283952	8.7141914318974	11.9754009435139	8.14652099930787
ENSMUSG00000041769	939.937128606855	701.742581511387	865.704815264448	852.889572561224	832.591778904555	943.019636550391	522.229203667065	661.333089075697	734.747677640793	595.037114538699	488.551681710652	674.512686170606	855.98091889981	612.735242133919	0.482489839992465	3.05055631455898e-05	0.00204737336914827	Ppp2r2d	7	138447808	138484786	+	5903	protein_coding	protein phosphatase 2, regulatory subunit B, delta [Source:MGI Symbol;Acc:MGI:1289252]	-	883	653	935	955	903	965	534	777	749	516	503	591	10.1203153047829	7.49421910359317	9.18984153733138	8.99970830644078	8.92363450570642	10.1392228925383	5.59914351717345	7.14411410541461	7.92798511829537	6.33030274090344	5.29009931657901
ENSMUSG00000038859	1215.63782657874	1334.7079421702	1195.32076631701	1488.76117011472	1064.02094446939	1426.74473509178	573.082983799438	793.259252276125	1243.87190286853	816.44627343682	571.110116989788	913.045937286776	1287.53223079031	818.469411109579	0.653826318006456	3.24184246812091e-05	0.00216392984747071	Baiap2l1	5	144201336	144294922	-	3366	protein_coding	BAI1-associated protein 2-like 1 [Source:MGI Symbol;Acc:MGI:1914148]	-	1142	1242	1291	1667	1154	1460	586	932	1268	708	588	800	22.9539861545306	24.9973212931449	22.2526289195743	27.5498560124116	19.999470806762	26.9022673527701	10.7754801209822	15.0280263402794	23.5374241600729	15.23234290714	10.8450569809133
ENSMUSG00000018401	1175.18753112341	1104.73410994442	1136.98985363074	1390.52258060505	1232.75216876566	1409.15473150846	856.690603768443	749.851288900501	1033.94399497116	1132.41559394768	807.130114317201	798.915195125929	1241.55682926296	896.491131838485	0.470725212540283	3.42781368153676e-05	0.00222753479558913	Mtmr4	11	87482988	87507128	+	6240	protein_coding	myotubularin related protein 4 [Source:MGI Symbol;Acc:MGI:2180699]	-	1104	1028	1228	1557	1337	1442	876	881	1054	982	831	700	11.9699023313448	11.1607791158236	11.4178142195422	13.8803963708143	12.4989527020626	14.3327924145361	8.68905691903221	7.6628701370564	10.5538231628444	11.3965778088728	8.26770663099972
ENSMUSG00000031561	1102.80279188755	782.340887197993	857.371827737839	943.983537379281	937.7030333842	906.862406962448	603.399660416814	423.865995314925	663.136755787952	809.527237221254	570.138841280622	703.045371710818	921.844080758218	628.852310288731	0.553415321197562	3.48067770225081e-05	0.00224998334416023	Tenm3	8	48680717	49296986	-	10237	protein_coding	teneurin transmembrane protein 3 [Source:MGI Symbol;Acc:MGI:1345183]	-	1036	728	926	1057	1017	928	617	498	676	702	587	616	6.84688723337561	4.81775448191426	5.24816497510049	5.74381084388949	5.79528844496908	5.62244755539907	3.73048747680292	2.64032134311322	4.12598632693928	4.96606009471764	3.55986904168514
ENSMUSG00000052934	3590.49596239063	3338.91914357715	3791.5093246074	3932.22281464615	3202.2051474369	4708.25762580288	1860.07480407258	2226.57318020852	3581.52706417428	2510.45697354796	1490.90821357028	2769.95311224376	3760.60166974352	2406.58222463623	0.644128123505273	3.51401518316985e-05	0.00225964054867498	Fbxo31	8	122276179	122305545	-	5482	protein_coding	F-box protein 31 [Source:MGI Symbol;Acc:MGI:1354708]	-	3373	3107	4095	4403	3473	4818	1902	2616	3651	2177	1535	2427	41.6277974816505	38.3961969005516	43.3395173052461	44.6794171919612	36.9566467836131	54.5102162169098	21.4745764599452	25.8999458051108	41.6127668840442	28.7585483082714	17.3835300375603
ENSMUSG00000005836	339.569585532941	344.960748338676	389.798638744741	523.343758660604	437.041531783786	418.251196314577	168.208657360927	184.6966284806	321.758662571669	270.995585109679	133.064772155784	317.283463207155	408.827576562554	232.667961480969	0.815933459712217	3.74029840144142e-05	0.00238022512779811	Gata6	18	11052064	11085635	+	6508	protein_coding	GATA binding protein 6 [Source:MGI Symbol;Acc:MGI:107516]	zf-GATA	319	321	421	586	474	428	172	217	328	235	137	278	3.31626526336061	3.34151547095573	3.75321762182276	5.0089640757716	4.24871504377706	4.07893105821639	1.63581440511203	1.80972396065845	3.14905387849269	2.61497703890232	1.30689785943525
ENSMUSG00000035948	585.464802643002	569.561360185352	678.675539667209	777.871013299294	866.706835183036	673.306248272766	408.786155679463	380.4580319393	512.067139824425	497.017434818177	538.086742878134	537.555795577589	691.930966541777	478.995216786181	0.532482738629623	3.77049809901628e-05	0.00238707513670711	Acss3	10	106769378	106959529	-	7196	protein_coding	acyl-CoA synthetase short-chain family member 3 [Source:MGI Symbol;Acc:MGI:2685720]	-	550	530	733	871	940	689	418	447	522	431	554	471	5.17103715041663	4.98965712304661	5.9099256208942	6.7332516397669	7.62014974757631	5.9385197813086	3.5953258125154	3.37144838567281	4.53245123422323	4.33744196853747	4.77955247150623
ENSMUSG00000026491	1261.41052933083	1078.9426521247	1214.7644038791	1629.86750777407	1308.35850970716	1564.53309649448	533.96469138992	832.411532967866	677.851328771413	1165.85760232292	826.555628500527	1092.23120247931	1342.97944988506	854.811997738658	0.652800875401068	3.80382271062379e-05	0.00239582310419905	Ahctf1	1	179572459	179631245	-	15116	protein_coding	AT hook containing transcription factor 1 [Source:MGI Symbol;Acc:MGI:1915033]	-	1185	1004	1312	1825	1419	1601	546	978	691	1011	851	957	5.30380551026747	4.49969231004424	5.03577302291624	6.71620325279125	5.47611196611948	6.56908057537636	2.23567610519891	3.51157637409683	2.85624170340631	4.84352821737069	3.49511363706709
ENSMUSG00000044037	944.195054444259	810.28163316935	800.892690057484	954.7004744167	876.849149211774	871.682399795802	493.868441670164	669.844454443466	683.737157964797	801.455028303093	505.06336876648	590.055936971579	876.433566849228	624.004064686597	0.490746291638913	3.94045911098623e-05	0.00242828422657875	Als2cl	9	110708938	110729598	+	5883	protein_coding	ALS2 C-terminal like [Source:MGI Symbol;Acc:MGI:2447532]	-	887	754	865	1069	951	892	505	787	697	695	520	517	10.2007215915229	8.68277376890636	8.53073505997251	10.1082669336693	9.42993014527338	9.40407634526303	5.31307143857239	7.2606588403238	7.40265861169721	8.55526601753882	5.48748213023348
ENSMUSG00000041237	7462.01503004989	6980.88791653594	8285.76726395887	7345.56726106394	7644.538692024	6141.84291784374	3501.08717065186	4045.45195930088	5266.83615654662	6130.26608699172	5029.26562206314	6544.25675550297	7310.10318024606	5086.19395850953	0.523542390244209	3.96593459313564e-05	0.00242828422657875	Pklr	3	89043449	89054091	+	3236	protein_coding	pyruvate kinase liver and red blood cell [Source:MGI Symbol;Acc:MGI:97604]	-	7010	6496	8949	8225	8291	6285	3580	4753	5369	5316	5178	5734	146.560057969508	135.995172226807	160.448325981593	141.39213062577	149.460079611449	120.461123480436	68.4743060114397	79.7185605578409	103.666558892307	118.96631820969	99.3395428075157
ENSMUSG00000039840	606.75443183002	531.948817531603	574.05025183311	673.380877184464	591.020299310985	677.215137957949	383.359265613276	425.568268388479	377.674039908819	538.531652111575	461.355961853996	471.359965124298	609.061635941355	442.974858833407	0.46126591298228	3.97398737617919e-05	0.00242828422657875	Epg5	18	77981680	78078228	+	10039	protein_coding	ectopic P-granules autophagy protein 5 homolog (C. elegans) [Source:MGI Symbol;Acc:MGI:1918673]	-	570	495	620	754	641	693	392	500	385	467	475	413	3.84140877860107	3.34041736575177	3.58319489273306	4.17809910065109	3.7247264446384	4.28147015087944	2.41684466522416	2.70320944995742	2.39620553526421	3.36879037956452	2.9374587669201
ENSMUSG00000032187	1778.74851857537	1536.74102842463	1612.89603015045	1548.59740190698	1860.65360999933	1587.00921218428	1375.00797819456	1178.82410343609	1479.30507060389	1180.84884745664	1222.83611784038	1337.61229812513	1654.10763354017	1295.73906927611	0.352323906160679	4.47800922524984e-05	0.00268287362461066	Smarca4	9	21527465	21615526	+	6475	protein_coding	SWI/SNF related, matrix associated, actin dependent regulator of chromatin, subfamily a, member 4 [Source:MGI Symbol;Acc:MGI:88192]	-	1671	1430	1742	1734	2018	1624	1406	1385	1508	1024	1259	1172	17.4599421416017	14.9617451446475	15.6090895817742	14.8972863461939	18.1805993466889	15.5559447634109	13.4399815827849	11.6094099584092	14.5517545451434	11.4526963363749	12.0713149484865
ENSMUSG00000038170	1961.83932958373	1980.56903173888	2161.94731940373	2306.82069730434	2097.61494685256	2314.06269362832	1565.70965369096	1599.28555260391	1562.6876508435	1811.63431577577	1840.56746887015	1850.05933042733	2137.14233641859	1704.99066203527	0.326650800132796	4.67361694919136e-05	0.00274392213128777	Pde4dip	3	97597140	97796023	-	16857	protein_coding	phosphodiesterase 4D interacting protein (myomegalin) [Source:MGI Symbol;Acc:MGI:1891434]	-	1843	1843	2335	2583	2275	2368	1601	1879	1593	1571	1895	1621	7.39692425432063	7.40680713881454	8.03666366114046	8.52397102061985	7.87277647789459	8.71267574551429	5.8784681671471	6.04987832430471	5.90458366566254	6.74906265701247	6.97906995042574
ENSMUSG00000046532	703.622244630953	523.351664925031	695.341514720428	821.63183953542	650.030126387277	721.190146916257	381.4033509928	344.710297394668	266.82425676675	613.487877780209	338.003946789875	567.22978853941	685.861256185894	418.609919710619	0.714661057042384	4.71395187837258e-05	0.00274392213128777	Ar	X	97192375	97366821	+	10048	protein_coding	androgen receptor [Source:MGI Symbol;Acc:MGI:88064]	ESR-like	661	487	751	920	705	738	390	405	272	532	348	497	4.4506962550733	3.28348716428594	4.33640169759967	5.09337961890635	4.0929486651741	4.55540375711346	2.40236010053079	2.18763842866036	1.69138731600958	3.83424242055232	2.1501474395044
ENSMUSG00000025871	1489.20956163193	1610.89146965631	1926.77189365275	1861.17473216502	1836.68086774958	1966.17151164703	1242.98374131243	1286.91844360676	1202.67109851484	1561.39583931279	1024.69587317045	1533.91717464178	1781.81667275044	1308.76369509318	0.446087788070741	4.82383825386311e-05	0.002780532353868	4833439L19Rik	13	54699031	54713248	-	3187	protein_coding	RIKEN cDNA 4833439L19 gene [Source:MGI Symbol;Acc:MGI:1921162]	-	1399	1499	2081	2084	1992	2012	1271	1512	1226	1354	1055	1344	29.6989964257197	31.8643862232227	37.8842951871384	36.3758789812031	36.4614619185821	39.1557956341819	24.684061099788	25.7495636888618	24.0360001742488	30.7669299490145	20.5512867946903
ENSMUSG00000047446	649.333690204056	560.964207578781	678.675539667209	845.744947869611	623.291298493333	820.866833888423	305.12268079424	451.953501028565	480.676050793042	501.630125628555	335.090119662376	610.599470560531	696.479419616902	447.511991411218	0.639706637315568	4.84476407529517e-05	0.002780532353868	Arl4a	12	40055446	40088024	-	7701	protein_coding	ADP-ribosylation factor-like 4A [Source:MGI Symbol;Acc:MGI:99437]	-	610	522	733	947	676	840	312	531	490	435	345	535	5.35906265632156	4.59207917795176	5.5223769338988	6.84070245747308	5.12066517563151	6.76522590056052	2.50761348293815	3.74237707928141	3.97560060864875	4.09062525595829	2.78125363174523
ENSMUSG00000048538	1131.54379129002	1355.12617961081	1218.46795389092	1484.29577968246	1404.24947870613	1513.7175305871	716.842708404416	890.288817468699	951.542386263778	1028.63005071419	963.505503492976	1249.73162666127	1351.23345229458	966.756848834222	0.484050160129707	4.92762434819055e-05	0.00281493405788262	Gm9826	1	7247963	7249261	+	1299	processed_pseudogene	predicted gene 9826 [Source:MGI Symbol;Acc:MGI:3642725]	-	1063	1261	1316	1662	1523	1549	733	1046	970	892	992	1095	55.3643539568411	65.7645607231051	58.778152776381	71.1737278832392	68.3939299622955	73.9592344098716	34.9259275866401	43.7041502276462	46.6569531956888	49.7282601926367	47.4101298531211
ENSMUSG00000035969	1242.24986306251	1143.42129667399	1258.28111651806	1335.15173924506	1186.65074136231	1301.66026516593	694.349690268944	890.288817468699	772.02459586556	937.52940720923	654.639827978091	1236.03593760197	1244.56917033798	864.144712732083	0.527330386695716	5.03625163431964e-05	0.00286366863762564	Rusc2	4	43381979	43427088	+	7923	protein_coding	RUN and SH3 domain containing 2 [Source:MGI Symbol;Acc:MGI:2140371]	-	1167	1064	1359	1495	1287	1332	710	1046	787	813	674	1083	9.96522991778654	9.09783298862871	9.95173942436924	10.4966177480125	9.4757959039318	10.4271281031428	5.546535774132	7.1654286439117	6.20638722346193	7.43102036502416	5.28127599997044
ENSMUSG00000028008	178.832885170953	149.375526539177	159.25265050854	204.514881797403	178.87353832501	186.649482467487	117.354877228554	103.838657486789	120.659498464376	114.164097556843	100.04139804413	136.956890593016	176.249827468095	115.502569895618	0.61322714252165	5.0938890418889e-05	0.00288309424942301	Asic5	3	81889597	81928540	+	2307	protein_coding	acid-sensing (proton-gated) ion channel family member 5 [Source:MGI Symbol;Acc:MGI:1929259]	-	168	139	172	229	194	191	120	122	123	99	103	120	4.92683264387348	4.08181383924613	4.32563676247698	5.52186434295743	4.90547359618297	5.13494637960109	3.21948775167661	2.8702014733515	3.33128131359402	3.10767190760489	2.77177679081461
ENSMUSG00000030055	270.378290675132	298.751053078355	312.949975999341	334.904282419329	296.893192477593	342.02784745351	224.930181354728	179.589809259938	220.718594751907	243.319440247414	243.790203000743	204.294028467916	309.317440350543	219.440376180441	0.497479582183071	5.24528868523227e-05	0.00294576237587261	Rab43	6	87765835	87789146	-	5526	protein_coding	RAB43, member RAS oncogene family [Source:MGI Symbol;Acc:MGI:1917084]	-	254	278	338	375	322	350	230	211	225	211	251	179	3.1097749373004	3.40815943798075	3.54874680761729	3.77501109459613	3.39916149226982	3.92832403337379	2.57614367824395	2.0723911147209	2.5440487508479	2.76515280961658	2.81988543682071
ENSMUSG00000059325	487.532508382718	453.499799996639	521.274664164582	618.90311391092	499.739473052347	495.451767596941	287.519449209957	267.256872547965	419.855815794739	330.960565644587	294.296539877391	463.370813173039	512.733554517358	343.87667604128	0.578687510673183	5.74008443886344e-05	0.00320453259446004	Hopx	5	77234835	77262968	-	1516	protein_coding	HOP homeobox [Source:MGI Symbol;Acc:MGI:1916782]	Homeobox	458	422	563	693	542	507	294	314	428	287	303	406	20.4396003443923	18.8581565956105	21.5465821094847	25.4291520438972	20.8558018654136	20.7423949010003	12.0033164219254	11.2416638203041	17.6399910114201	13.7097727877213	12.4082933120631
ENSMUSG00000039286	380.019880988276	280.48210378939	508.312239123189	350.979687975456	422.289075014713	522.813995393222	240.577498318535	183.845491943823	293.310488136979	249.085303760386	298.181642714056	293.316007353377	410.816163714041	259.719405371193	0.663305476470533	5.8961018484431e-05	0.00327673859287684	Fndc3b	3	27470311	27765456	-	11485	protein_coding	fibronectin type III domain containing 3B [Source:MGI Symbol;Acc:MGI:1919257]	-	357	261	549	393	458	535	246	216	299	216	307	257	2.10301969373176	1.53955601869423	2.77338741232643	1.90352855477211	2.32627624313583	2.88916884271574	1.32573656059136	1.02075824959764	1.62664948706369	1.36197869300089	1.65949519662004
ENSMUSG00000022723	222.476625004341	186.988069192927	210.176463171155	256.313410811593	189.937880901814	333.232845661848	130.068322261647	111.498886317782	103.982982416454	126.848997285382	143.748804956613	204.294028467916	233.187549123946	136.740336950966	0.773239839238339	6.27072082115725e-05	0.00345367682176921	Crybg3	16	59311138	59421342	-	12711	protein_coding	beta-gamma crystallin domain containing 3 [Source:MGI Symbol;Acc:MGI:2676311]	-	209	174	227	287	206	341	133	131	106	110	148	179	1.11242999504927	0.927375285170496	1.0361325891074	1.25603003080961	0.945397193435504	1.66389072355158	0.647627151243468	0.559360408547566	0.521050645583148	0.626701202881535	0.722854052982608
ENSMUSG00000055652	532.240729675456	594.278173929245	786.078490010178	714.462469161235	546.762929003767	744.643485027355	347.174845134472	461.316002933112	446.342047164968	509.702334546715	311.779502642385	535.273180734373	653.077712801206	435.264652192671	0.586846607780879	6.50083573362498e-05	0.00354858953246142	Klhl25	7	75498058	75523879	+	3856	protein_coding	kelch-like 25 [Source:MGI Symbol;Acc:MGI:2668031]	-	500	553	849	800	593	762	355	542	455	442	321	469	8.77281764767966	9.71569995281365	12.7743808582339	11.5411957448067	8.97107474591975	12.2565456280518	5.69828876276554	7.6289085374079	7.37272717348941	8.30104572214169	5.16816809790162
ENSMUSG00000038174	575.884469508843	650.159665871959	703.674502247038	946.662771638636	769.893837635995	866.796287689323	409.764112989701	361.733028130207	573.868346354959	538.531652111575	439.016620543171	648.262615473611	752.178589098632	495.196062600537	0.605067244760967	6.5328104088334e-05	0.00355026448855273	Fam126b	1	58561965	58625482	-	12041	protein_coding	family with sequence similarity 126, member B [Source:MGI Symbol;Acc:MGI:1098784]	-	541	605	760	1060	835	887	419	425	585	467	452	568	3.03977075052802	3.40391578110532	3.66201594570592	4.89712459923317	4.04529992227548	4.56889527582467	2.1537961297971	1.91569568290874	3.035617874984	2.80867757000649	2.33047528831267
ENSMUSG00000030089	172.445996414848	161.196611373213	226.842438224374	150.930196610311	208.378451863156	161.241699513797	108.553261436412	32.3431883975244	111.8307546743	80.7220891816065	56.3339911316458	135.815583171408	180.172565666616	87.5998113321494	1.04501595495503	6.72651855369275e-05	0.003639431756672	Slc41a3	6	90581707	90623394	+	2911	protein_coding	solute carrier family 41, member 3 [Source:MGI Symbol;Acc:MGI:1918949]	-	162	150	245	169	226	165	111	38	114	70	58	119	3.76512095198306	3.49088097756494	4.88307139459673	3.22955246643926	4.52890322616501	3.51553866652588	2.36011898828035	0.708502746402375	2.44690122108347	1.74141947249587	1.23695645666668
ENSMUSG00000109511	421.534657902961	314.870714215676	417.57526383344	425.105169150935	385.407933092031	361.572295879424	251.335028731153	276.619374452512	290.367573540287	332.113738347181	274.871025694065	238.53325111617	387.677672345744	277.306665313561	0.484520198275391	6.8936409901246e-05	0.00367536958633458	Nup62	7	44465512	44480236	+	2854	protein_coding	nucleoporin 62 [Source:MGI Symbol;Acc:MGI:1351500]	-	396	293	451	476	418	370	257	325	296	288	283	209	9.38744358821534	6.95504012153146	9.16836233311164	9.27792439426245	8.54376157014705	8.04077473732779	5.57355486008325	6.18058436730191	6.48024661771691	7.30779037099519	6.15603514387518
ENSMUSG00000026434	2016.12788401063	2155.73601609777	1965.65916877692	2418.45545811078	1943.63617932536	2435.23827386899	1599.93815954928	1193.2934245613	1528.35364721543	1853.14853306917	1606.49002296107	1843.21148589768	2155.80883003174	1604.07254554232	0.427283435804375	6.9126394271559e-05	0.00367536958633458	Nucks1	1	131838272	131864059	+	6779	protein_coding	nuclear casein kinase and cyclin-dependent kinase substrate 1 [Source:MGI Symbol;Acc:MGI:1934811]	-	1894	2006	2123	2708	2108	2492	1636	1402	1558	1607	1654	1615	18.9025529738497	20.0470873565789	18.1699426026906	22.2218837484636	18.1397701453084	22.7998791107797	14.9372548627391	11.2249011874046	14.3600387292882	17.1671343006508	15.1474139859403
ENSMUSG00000099556	25.5475550244219	34.3886104262854	41.6649376330483	22.3269521612886	33.1930277304142	10.7494466342532	1.9559146204759	6.80909229421567	9.80971532230699	10.3785543233494	7.77020567333046	9.13045937286776	27.9784216016186	7.64232360109103	1.88145017292396	7.10340388081182e-05	1	Gm28857	1	130667655	130691877	-	1232	lncRNA	predicted gene 28857 [Source:MGI Symbol;Acc:MGI:5579563]	-	24	32	45	25	36	11	2	8	10	9	8	8	1.31797343569296	1.75964580531455	2.11919539270871	1.12882636952047	1.70458475494623	0.553773433888357	0.100478331211011	0.352435320365228	0.507157770461238	0.529028858533388	0.403132584567477
ENSMUSG00000070604	69.1912948578093	64.4786445492851	49.997925159658	53.5846851870926	45.1793988552859	58.6333452777445	16.6252742740451	18.7250038090931	23.5433167735368	32.2888356726426	30.1095469841555	36.521837491471	56.8442156478126	26.302302500824	1.11972667159685	7.46183875814809e-05	0.00389723160167151	Vsig10l	7	43112575	43121443	+	4075	protein_coding	V-set and immunoglobulin domain containing 10 like [Source:MGI Symbol;Acc:MGI:1922940]	-	65	60	54	60	49	60	17	22	24	28	31	32	1.07917497679236	0.997492468779537	0.76883888799523	0.819070873471929	0.701447665211956	0.91321655846129	0.258210818267904	0.293018617275434	0.367991189128782	0.497597259821888	0.472283425454021
ENSMUSG00000022708	1721.26651977043	1647.42936823424	1618.45135516819	2223.76443526434	1813.63015404791	2055.09875198495	1282.10203372195	1330.32640698239	1204.6330415793	1617.90130173991	1454.97101233113	1496.2540297287	1846.60676407834	1397.6979710139	0.402562658264284	7.68537736125135e-05	0.00398277657176747	Zbtb20	16	42696244	43462965	+	30730	protein_coding	zinc finger and BTB domain containing 20 [Source:MGI Symbol;Acc:MGI:1929213]	ZBTB	1617	1533	1748	2490	1967	2103	1311	1563	1228	1403	1498	1311	3.56002938506769	3.37960218849878	3.30025929727183	4.50748854832482	3.73395093320896	4.24450307596251	2.64054307862231	2.76055601960791	2.49683359030174	3.3063031632481	3.02634110637944
ENSMUSG00000037606	558.852766159229	522.27702084921	653.67657708738	726.072484285105	411.224732437909	619.5590151015	110.509176056888	161.715941987622	285.462715879133	377.087473748362	157.346664884942	385.761908503663	581.943765986722	246.313980176768	1.24202796492453	7.82342395575907e-05	0.00402820250318267	Osbpl5	7	143242499	143310722	-	4915	protein_coding	oxysterol binding protein-like 5 [Source:MGI Symbol;Acc:MGI:1930265]	-	525	486	706	813	446	634	113	190	291	327	162	338	7.22673124962877	6.69882658458608	8.33394008823284	9.20163217036509	5.29344181343853	8.0004769061128	1.4230103110755	2.09811952673175	3.69933156874058	4.81805543267084	2.04625670799378
ENSMUSG00000064369	449.211175846085	488.963054498746	713.859264779561	722.500171939299	596.552470599388	607.832346045951	336.417314721854	322.580747438467	473.809250067428	467.034944550723	305.951848387387	456.522968643388	596.486413951505	393.719512301541	0.601644295829985	7.87375444744268e-05	0.00402939383847879	mt-Te	MT	14071	14139	-	69	Mt_tRNA	mitochondrially encoded tRNA glutamic acid [Source:MGI Symbol;Acc:MGI:102488]	-	422	455	771	809	647	622	344	379	483	405	315	400	413.779988593306	446.733266588372	648.297702435753	652.224751643254	546.993287643582	559.10249997679	308.576236187509	298.119418962854	437.372861245772	425.063187204218	283.419734454613
ENSMUSG00000059811	3104.02793546726	3206.73792225111	3279.49353547238	4262.66170663322	2861.97661320015	4017.36137394679	2169.10931410777	2533.83346998501	2861.49395951695	2581.95368110881	2023.16730219342	2954.84491454433	3455.37651449515	2520.73377357605	0.455249350708002	8.08975781835634e-05	0.0040925645709486	Atl2	17	80155819	80203552	-	9844	protein_coding	atlastin GTPase 2 [Source:MGI Symbol;Acc:MGI:1929492]	-	2916	2984	3542	4773	3104	4111	2218	2977	2917	2239	2083	2589	20.0411222716384	20.5358745121655	20.8759451437092	26.9722809363693	18.3940310221765	25.9015653913129	13.9457881139405	16.4137334522554	18.5147825543321	16.4713824186612	13.1367001973511
ENSMUSG00000049878	340.634066992292	314.870714215676	391.650413750654	466.186761127706	337.462448592544	458.317315587703	161.362956189262	300.451197482266	222.680537816369	321.735184023832	252.53168438324	196.304876516657	384.853620044429	242.511072735271	0.666736579891907	8.25029752898029e-05	0.00415287517421868	Rlf	4	121002570	121072281	-	9492	protein_coding	rearranged L-myc fusion sequence [Source:MGI Symbol;Acc:MGI:1924705]	zf-C2H2	320	293	423	522	366	469	165	353	227	279	260	172	2.28085864977347	2.09120148618318	2.58554340538149	3.05921935753936	2.24931439639905	3.0645397108394	1.07591841385242	2.01844594244569	1.49424537208461	2.1285998909721	1.70052978150882
ENSMUSG00000037355	413.018806228154	394.394375826461	453.684876448748	534.060695698023	435.197474687652	470.043984643252	355.976460926613	237.467093760771	210.9088794296	339.032774562747	268.072095729901	384.620601082054	450.066702255382	299.346317581948	0.591200434426292	8.45283565203669e-05	0.00423745826442101	Uvssa	5	33535893	33577098	+	8666	protein_coding	UV stimulated scaffold protein A [Source:MGI Symbol;Acc:MGI:1918351]	-	388	367	490	598	472	481	364	279	215	294	276	337	3.029138731038	2.86901862522409	3.28054946449829	3.83866616282035	3.17724072794142	3.44252047431728	2.59977536781188	1.74737317964602	1.55014943733871	2.45683622832091	1.97723833077037
ENSMUSG00000029406	2889.00268067838	2639.32585021741	2553.59773315438	3121.30791214814	2722.75030244203	2635.56887023462	2223.8749234811	2421.48344713045	2387.68470944952	2144.90122682554	2133.89273303838	2278.04961353051	2760.25889147916	2264.98110890925	0.285150620945594	8.59504249229248e-05	0.00428213743672342	Pitpnm2	5	124256753	124387823	-	12843	protein_coding	phosphatidylinositol transfer protein, membrane-associated 2 [Source:MGI Symbol;Acc:MGI:1336192]	-	2714	2456	2758	3495	2953	2697	2274	2845	2434	1860	2197	1996	14.2971503358117	12.9553117470468	12.4593955726642	15.1383500270529	13.4129335016716	13.0246062862301	10.9591558597746	12.0230854871617	11.8415317323746	10.4880324768913	10.6201878375295
ENSMUSG00000034220	286.345512565395	463.171596679032	464.795526484228	258.992645070948	475.766730802603	155.378364986023	143.759724604978	117.45684207522	227.585395477522	57.6586351297189	117.524360809123	147.228657387493	350.741729431371	135.202269247343	1.37463203299667	8.62645916186089e-05	0.00428213743672342	Gpc1	1	92759367	92788501	+	5159	protein_coding	glypican 1 [Source:MGI Symbol;Acc:MGI:1194891]	-	269	431	502	290	516	159	147	138	232	50	121	129	3.52770999205381	5.659756284258	5.64556464153778	3.12701752511938	5.83459856419405	1.9115327215902	1.76361966424103	1.45182311075825	2.8098054387345	0.701862498883433	1.45609082784074
ENSMUSG00000045973	3306.27941274393	3235.75331229829	3688.73581177921	4426.09499645385	3361.7160862525	4158.08140261338	3092.30101497239	2759.3846522309	2775.16846468065	2660.36942488523	2071.73108765173	3160.28025043385	3696.11017035686	2753.20581580913	0.425121430284174	9.1432283044499e-05	0.00445623531885927	Slc25a51	4	45395923	45408766	-	5510	protein_coding	solute carrier family 25, member 51 [Source:MGI Symbol;Acc:MGI:2684984]	-	3106	3011	3984	4956	3646	4255	3162	3242	2829	2307	2133	2769	38.137829743158	37.0207441946246	41.9504791921253	50.0354193568574	38.6004059909751	47.8958743473385	35.519217732515	31.9346057219794	32.0800576734324	30.3210025895584	24.0329941277484
ENSMUSG00000028906	3207.2826370243	3353.96416063865	3622.99779906929	3957.22900106679	3626.33827954775	3928.43413360888	3019.93217401479	2915.99377499786	3161.67124837954	3050.14179836213	2883.71758051477	2848.70332433474	3616.04100182594	2980.02665010064	0.279314574829772	9.20775954855742e-05	0.00446994872629969	Epb41	4	131650724	131802632	-	16386	protein_coding	erythrocyte membrane protein band 4.1 [Source:MGI Symbol;Acc:MGI:95401]	-	3013	3121	3913	4431	3933	4020	3088	3426	3223	2645	2969	2496	12.4403415539364	12.90347860966	13.8549860399751	15.0427294534389	14.0016043986783	15.2160961109419	11.6642673902255	11.3478753061135	12.289696184854	11.6896171499467	11.2487915971835
ENSMUSG00000048486	2467.46802277541	2065.46591372877	2410.08517019611	2372.90847570175	2377.91162546495	2907.23670335483	1215.60093662577	1196.6979707084	1859.9220251094	2453.95151112084	1318.02113733868	1718.80897694236	2433.5126518703	1627.16709297424	0.581324029668694	9.31535018879288e-05	0.00450437523695883	Fitm2	2	163308299	163314549	-	3967	protein_coding	fat storage-inducing transmembrane protein 2 [Source:MGI Symbol;Acc:MGI:2444508]	-	2318	1922	2603	2657	2579	2975	1243	1406	1896	2128	1357	1506	39.5327798744802	32.8229167269626	38.0698497498586	37.2586572202789	37.9241581258143	46.5130597861357	19.3937616506924	19.2363764322563	29.8627586489244	38.8469552222936	21.2366627823903
ENSMUSG00000022742	3588.36699947192	3754.80640092004	4892.38956562283	4468.06966651707	4481.05874360591	5202.73217097853	2201.38190534562	1829.09241753368	3101.83198491347	4019.960041244	2496.17857255741	3689.84689406018	4397.90392451938	2889.71530260906	0.606334994262882	9.44395536456286e-05	0.0045486533250024	Cpox	16	58490655	58537999	+	6661	protein_coding	coproporphyrinogen oxidase [Source:MGI Symbol;Acc:MGI:104841]	-	3371	3494	5284	5003	4860	5324	2251	2149	3162	3486	2570	3233	34.2393445210945	35.5360747763261	46.0248699949949	41.7819701456707	42.5621583009543	49.5734053965501	20.9165082886185	17.5104428064241	29.6603467359927	37.89967719635	23.9531323104813
ENSMUSG00000018846	1982.0644773114	1949.40435354005	2148.05900685938	2472.93322138432	2091.16074701609	2287.67768825333	1165.72511380363	1208.61388222328	1769.67264414418	1826.6255609095	1603.57619583357	1818.10272262229	2155.2165823941	1565.38601992274	0.462094855187895	0.000105580553220645	0.00502612540564324	Pank3	11	35660311	35682112	+	7376	protein_coding	pantothenate kinase 3 [Source:MGI Symbol;Acc:MGI:2387464]	-	1862	1814	2320	2769	2268	2341	1192	1420	1804	1584	1651	1593	17.0790964722562	16.6610498098377	18.2488823790545	20.8833368090731	17.9369645254754	19.6847836466996	10.0024979955222	10.4488280717825	15.2816207330216	15.5518418456496	13.8961594572423
ENSMUSG00000040017	9770.87531538202	11395.5257800103	12901.3164661977	13232.7380069525	11187.8944022457	13814.9933698579	11293.4510186278	8227.93690102286	8521.69970048808	6223.67307590186	7070.88716273071	10177.0382784827	12050.557223441	8585.78102287568	0.489090308909137	0.000108276590370134	0.00511481954971534	Saa4	7	46377422	46382027	-	2094	protein_coding	serum amyloid A 4 [Source:MGI Symbol;Acc:MGI:98224]	-	9179	10604	13934	14817	12134	14137	11548	9667	8687	5397	7280	8917	296.568360012538	343.0670671456	386.072016530489	393.623889795064	338.029124285652	418.726764043231	341.336887104131	250.561989142064	259.207125504299	186.64798362463	215.835722641017
ENSMUSG00000000374	538.627618431562	598.576750232531	708.303939761821	800.197965460583	548.606986099901	846.274616842112	491.912527049688	476.636460595097	501.276452969887	471.647635361101	473.011270363992	495.327420978076	673.431312804752	484.968627886307	0.474275278925987	0.000109259111298541	0.00514145749030148	Trappc10	10	78022559	78080475	-	8128	protein_coding	trafficking protein particle complex 10 [Source:MGI Symbol;Acc:MGI:1336209]	-	506	557	765	896	595	866	503	560	511	409	487	434	4.2118504758423	4.64255960532331	5.46068261625139	6.13228258944535	4.2703166310073	6.60821763037641	3.83034079343866	3.73942200151295	3.92817653431857	3.64407389365529	3.71975117832082
ENSMUSG00000062762	4947.70982306304	4458.69827058307	4600.73500219149	4610.96216034932	4644.25779661378	4373.07033529844	3669.29582801278	3631.79960242728	4284.88365278369	3826.22702720815	3320.7916496396	4026.53258343468	4605.90556468319	3793.25505725103	0.280180460718205	0.000110350041032663	0.0051729740609281	Ei24	9	36690455	36708689	-	4868	protein_coding	etoposide induced 2.4 mRNA [Source:MGI Symbol;Acc:MGI:108090]	-	4648	4149	4969	5163	5037	4475	3752	4267	4368	3318	3419	3528	64.5983868448054	57.7402757150016	59.2226207826502	58.9996452955439	60.3598550735999	57.0154570798776	47.7051631884733	47.5742795496627	56.0642287217259	49.3597980283981	43.6030787226736
ENSMUSG00000035572	593.980654317809	499.70949525696	518.497001655712	580.500756193503	460.092245485463	509.132881495081	369.667863269945	293.642105188051	388.464726763357	428.980245365109	290.411437040726	461.088198329822	526.985505734088	372.042429326168	0.50462764499768	0.000113770115105392	0.00529933860543202	Dcaf10	4	45342101	45379759	+	7305	protein_coding	DDB1 and CUL4 associated factor 10 [Source:MGI Symbol;Acc:MGI:2140179]	-	558	465	560	650	499	521	378	345	396	372	299	404	5.16797140205192	4.3123968555296	4.44771552311992	4.94983795598625	3.98480553893369	4.42351641536665	3.20276228142663	2.56329754565429	3.38710576030753	3.68782480768554	2.54108733593347
ENSMUSG00000045875	281.023105268641	166.56983175232	243.508413277593	284.891909578042	243.415536689704	280.462834911878	125.178535710457	131.926163200429	103.002010884223	190.273495928072	154.432837757443	206.576643311133	249.978605246363	151.89828113196	0.72289580483498	0.000113908597283346	0.00529933860543202	Adra1a	14	66872700	67008617	+	8728	protein_coding	adrenergic receptor, alpha 1a [Source:MGI Symbol;Acc:MGI:104773]	-	264	155	263	319	264	287	128	155	105	165	159	181	2.04642254817954	1.20310338487793	1.74827684683753	2.03317045752749	1.76447697823337	2.0394698967584	0.907712586998833	0.96386699096219	0.751671965935675	1.36904198954409	1.13096980587984
ENSMUSG00000010936	1154.96238339574	1011.24007534796	1145.32284115735	985.958207442504	1099.05802929594	1129.66911901788	626.870635862525	693.676277473221	679.813271835874	1034.39591422716	656.582379396423	968.970000945591	1087.70177594289	776.718079956799	0.487284509768548	0.000118685143357748	0.00543914526388007	Vac14	8	111345217	111447030	+	6960	protein_coding	Vac14 homolog (S. cerevisiae) [Source:MGI Symbol;Acc:MGI:2157980]	-	1085	941	1237	1104	1192	1156	641	815	693	897	676	849	10.5469435522001	9.15938621520664	10.3116854130326	8.82384110530535	9.99065179744474	10.3014589127002	5.70035516503664	6.35548233606893	6.22125190565106	9.33320414560474	6.02984404939836
ENSMUSG00000109841	55.3530358862474	49.4336274877853	102.773512828186	48.2262166683833	61.775912720493	58.6333452777445	33.2505485480903	16.1715941987622	24.5242883057675	35.7483537804257	33.0233741116544	29.6739929618202	62.6992751448066	28.7320253177534	1.13366660808422	0.000121614754061301	0.00553212003474409	E330011O21Rik	16	78047749	78099375	-	3337	lncRNA	RIKEN cDNA E330011O21 gene [Source:MGI Symbol;Acc:MGI:3759668]	-	52	46	111	54	67	60	34	19	25	31	34	26	1.05427342653374	0.933872556551414	1.92990515994874	0.900192516769044	1.17123867089769	1.11518054412039	0.630631755733719	0.309027793643589	0.468098871147921	0.672748981623785	0.632544864487656
ENSMUSG00000034158	1615.88285529468	1120.85377108174	1435.12562958277	1749.53997135857	1402.40542161	1875.28982646653	910.47825583153	1104.77522473649	1071.22091319592	1296.16611771608	1005.27035898713	1254.29685634771	1533.18291256572	1107.03462113581	0.470533785341483	0.00012496506574731	0.00563571877826403	Lrrc58	16	37688751	37709220	+	8604	protein_coding	leucine rich repeat containing 58 [Source:MGI Symbol;Acc:MGI:2443542]	-	1518	1043	1550	1959	1521	1919	931	1298	1092	1124	1035	1099	11.9365134824429	8.21239622679085	10.4520262459749	12.6657782283645	10.3123019135822	13.8332655275171	6.69734089216528	8.1879359668115	7.9300518775384	9.4604865227228	7.4680732977929
ENSMUSG00000035569	1345.50456461955	1245.51248387703	1434.19974207982	1501.26426332504	1489.0761051283	1691.57201126293	1012.18581609628	1048.60021330921	1036.88690956785	1184.30836556443	1217.00846358538	1280.5469270447	1451.18819504878	1129.92278252798	0.361950047915569	0.000128894732372179	0.00573581559056199	Ankrd11	8	123610561	123769016	-	16580	protein_coding	ankyrin repeat domain 11 [Source:MGI Symbol;Acc:MGI:1924337]	-	1264	1159	1549	1681	1615	1731	1035	1232	1057	1027	1253	1122	5.15784955967531	4.73570779866364	5.42045928587688	5.64002504382612	5.68217764914457	6.47534156663471	3.86374938762921	4.0329824163	3.98331134186438	4.48573361254114	4.6917533041803
ENSMUSG00000120481	89.4164425854766	133.255865401856	160.178538011497	164.326367907084	140.148339306193	145.606140773066	63.5672251654667	82.560244067365	50.0295481437656	69.1903621556627	101.983949462462	101.576360523154	138.821948997529	78.1512815863127	0.831228020435151	0.000129957062799108	0.00576221171587957	ENSMUSG00000120481	13	24020918	24022379	+	1041	lncRNA	novel transcript	-	84	124	173	184	152	149	65	97	51	60	105	89	5.45927133017105	8.06969171428594	9.64194320034933	9.83252226912028	8.51764754910477	8.87739775670403	3.86469969422564	5.05732835313715	3.06106983992512	4.17395807693329	6.26191536258991
ENSMUSG00000039361	2488.75765196243	2501.77140851226	3054.50287225392	3030.21394733009	2820.48532853714	3116.36230151212	1931.46568771995	2275.93909934159	2463.21951743128	2417.04998463782	1940.60886691428	2319.13668070841	2835.34891835133	2224.56997279222	0.35040206460554	0.000130751112226794	0.00577656532507007	Picalm	7	89779421	89862673	+	15732	protein_coding	phosphatidylinositol binding clathrin assembly protein [Source:MGI Symbol;Acc:MGI:2385902]	-	2338	2328	3299	3393	3059	3189	1975	2674	2511	2096	1998	2032	10.0546438568549	10.0250148893168	12.1665535778071	11.9976936131111	11.3428541100743	12.5724732923364	7.77027318531123	9.22523869724888	9.97278753576089	9.64839116720858	7.88460915400051
ENSMUSG00000044167	1504.11230206284	1674.29547012977	2108.24584423224	2212.15442014047	1415.31382128294	2261.29268287835	848.86694528654	941.357009675316	1231.11927294953	1405.71752446255	938.252335054652	1815.82010777908	1862.5690901211	1196.85553253461	0.638871158189741	0.000136054235499802	0.00593142483728351	Foxo1	3	52175757	52260642	+	8665	protein_coding	forkhead box O1 [Source:MGI Symbol;Acc:MGI:1890077]	Fork_head	1413	1558	2277	2477	1535	2314	868	1106	1255	1219	966	1591	11.0326468764632	12.1810541650528	15.2462718321001	15.9021294592789	10.3339562793291	16.5632260027672	6.20017979902518	6.92766226265287	9.04959097953084	10.1878537151543	6.92113281137866
ENSMUSG00000027947	3491.49918667099	3992.30274167657	4048.90605042934	4325.17717268482	3098.93795005339	4628.12538725663	1307.52892378814	1502.25598741133	2224.84343509922	2616.54886218664	1712.3590752602	3388.54173475555	3930.82474812862	2125.34633641685	0.887394103417864	0.00013618806416821	0.00593142483728351	Il6ra	3	89771366	89820503	-	8642	protein_coding	interleukin 6 receptor, alpha [Source:MGI Symbol;Acc:MGI:105304]	-	3280	3715	4373	4843	3361	4736	1337	1765	2268	2269	1763	2969	25.678266675817	29.1226267553375	29.3585370394002	31.1743963182038	22.6872082504471	33.9897188248402	9.57569425581337	11.0848697556668	16.3976865359442	19.0137507183921	12.6650431584401
ENSMUSG00000020778	83.0295538293712	41.9111189570353	52.7755876685279	66.9808564838658	82.0605407779683	53.7472331712658	34.2285058583282	8.51136536776959	33.3530320958438	28.8293175648595	22.3393413108251	34.2392226482541	63.4174818146724	26.9167974743134	1.24495641320616	0.000137455495320402	0.00594446617438443	Ten1	11	116089681	116106144	+	2728	protein_coding	TEN1 telomerase capping complex subunit [Source:MGI Symbol;Acc:MGI:1916785]	-	78	39	57	75	89	55	35	10	34	25	23	30	1.93444488142032	0.96851472752192	1.21227091281832	1.52937766193095	1.90314749521774	1.25045614103822	0.794102940216056	0.198955422786822	0.778732576579191	0.663656274145827	0.523422146091643
ENSMUSG00000004455	1524.33744979051	1402.41051894695	1520.30727985478	1417.3149231986	1541.63173236812	1377.883614027	1186.26221731863	1121.79795547203	1154.60349343553	1268.48997285382	1189.81274372873	1326.19922390904	1463.98091969766	1207.86093445296	0.278364251856903	0.000139685673654095	0.00601971734673541	Ppp1cc	5	122296341	122313336	+	3424	protein_coding	protein phosphatase 1 catalytic subunit gamma [Source:MGI Symbol;Acc:MGI:104872]	-	1432	1305	1642	1587	1672	1410	1213	1318	1177	1100	1225	1162	28.2953705049161	25.8203867913307	27.8232970178332	25.7834492577629	28.485859253738	25.5408588433555	21.9270481622422	20.8920858192672	21.4781315790334	23.2651839656168	22.2111454668968
ENSMUSG00000029467	3052.93282541842	2916.58402177933	3329.49146063204	3874.17273902679	3636.48059357648	4223.5553048402	2367.63464808607	2594.26416409617	2710.42434355342	3186.21617726827	2260.15857523	2804.19233489201	3505.53615754554	2653.81504052099	0.401991565100582	0.00014197992546956	0.0060358826114214	Atp2a2	5	122591576	122640288	-	6081	protein_coding	ATPase, Ca++ transporting, cardiac muscle, slow twitch 2 [Source:MGI Symbol;Acc:MGI:88110]	-	2868	2714	3596	4338	3944	4322	2421	3048	2763	2763	2327	2457	31.9087849196614	30.2357557229916	34.3094593756379	39.6837211674862	37.834561936824	44.0818588228471	24.6418274222833	27.2044597758387	28.3896261334383	32.9043596431396	23.7569128005972
ENSMUSG00000009566	5676.87962271841	4581.20769522671	5067.38230368163	5332.56925420217	4787.17222156418	5502.73945431632	2693.29443239531	2562.77211223542	3838.54160561872	5166.21370762282	2587.47848921904	4188.59823730309	5157.99175861824	3506.14976406573	0.557256022685719	0.000142026548990456	0.0060358826114214	Fpgs	2	32572621	32594157	-	3802	protein_coding	folylpolyglutamyl synthetase [Source:MGI Symbol;Acc:MGI:95576]	-	5333	4263	5473	5971	5192	5631	2754	3011	3913	4480	2664	3670	94.8998649143249	75.9607437191356	83.5184701937646	87.3640590738038	79.661664816345	91.8593895574007	44.8337379483316	42.9832044822288	64.306004586109	85.3323023155895	43.5001477154957
ENSMUSG00000029178	1260.34604787148	1178.8845511761	1288.83540411563	1673.62833401019	1196.79305539104	1753.13702380456	905.588469280341	946.463828895978	1022.17233658439	1073.60378611537	845.009866974687	1244.02508955323	1391.93740272817	1006.143896234	0.46912034106595	0.000144736558661362	0.00612984280509947	Klf3	5	64960731	64990244	+	11243	protein_coding	Kruppel-like factor 3 (basic) [Source:MGI Symbol;Acc:MGI:1342773]	zf-C2H2	1184	1097	1392	1874	1298	1794	926	1112	1042	931	870	1090	7.12484818318101	6.61013615267788	7.18333664117615	9.27225188830393	6.73471603735087	9.89669914829847	5.09778953802901	5.36812627785329	5.79080979171922	5.99673741198897	4.80402950105404
ENSMUSG00000035133	1458.33959931075	1351.90224738335	1819.36894330978	2171.96590625015	1702.06469973179	2002.32874123497	1146.16596759888	895.39563668936	1426.33260786344	1496.8181679675	893.573652433002	1339.89491296834	1750.99502287013	1199.69682425342	0.546419036869945	0.000145936581675614	0.00615942644721614	Arhgap5	12	52550755	52618758	+	10887	protein_coding	Rho GTPase activating protein 5 [Source:MGI Symbol;Acc:MGI:1332637]	-	1370	1258	1965	2432	1846	2049	1172	1052	1454	1298	920	1174	8.51370244213287	7.82813679515015	10.4718527546629	12.4266250029947	9.89122954951642	11.6730373653138	6.66304144157729	5.24454315989068	8.34468553912729	8.634039503992	5.24624089111051
ENSMUSG00000022946	1218.83127095679	1383.06692558217	1413.83021701477	1825.45160870695	1234.59622586179	1815.67925876749	954.486334792238	909.013821277792	931.922955619164	965.205552071495	1233.52015064121	1326.19922390904	1481.90925114833	1053.39133971849	0.493022354997133	0.000147943136370021	0.00622273150991984	Dop1b	16	93508792	93607478	+	9890	protein_coding	DOP1 leucine zipper like protein B [Source:MGI Symbol;Acc:MGI:1917278]	-	1145	1287	1527	2044	1339	1858	976	1068	950	837	1270	1162	7.83276898940817	8.81593223765757	8.95801820305307	11.4969447698176	7.89789021409824	11.6519753790123	6.1081072171243	5.86104570385336	6.00179428258678	6.12881804806081	7.97216085841325
ENSMUSG00000030170	470.500805033103	495.410918953674	379.613876212218	334.904282419329	517.258015465621	362.54951830072	209.282864390921	184.6966284806	173.631961204834	348.258156183502	212.709380307421	397.174982719748	426.706236064111	254.292328881171	0.749544022868862	0.000151332580681973	0.00634357254585662	Wnt5b	6	119409492	119521308	-	2654	protein_coding	wingless-type MMTV integration site family, member 5B [Source:MGI Symbol;Acc:MGI:98959]	-	442	461	410	375	561	371	214	217	177	302	219	348	11.2674975911516	11.7675484459779	8.96297393255485	7.860102226352	12.3307289055367	8.67008052936285	4.99075189659395	4.43771045062743	4.16702532245137	8.2405004279229	5.12285212777796
ENSMUSG00000016028	537.563136972211	550.217766820567	687.008527193819	807.342590152195	596.552470599388	711.4179227033	162.340913499499	440.888726050465	427.703588052585	476.260326171478	315.66460547905	499.89265066451	648.350402406913	387.125134986264	0.745086561598875	0.000154420871529777	0.00645101069431537	Celsr1	15	85783130	85918404	-	11631	protein_coding	cadherin, EGF LAG seven-pass G-type receptor 1 [Source:MGI Symbol;Acc:MGI:1100883]	-	505	512	742	904	647	728	166	518	436	413	325	438	2.93751738439922	2.98221460874907	3.70131497830953	4.32363695253474	3.24499500020696	3.88207984743539	0.883373075084959	2.41720147675823	2.34219594805945	2.57146464604672	1.73474214234393
ENSMUSG00000022615	635.495431232495	461.022308527389	682.379089679036	734.110187063169	692.443439598362	651.80735500426	429.32325919446	411.950083800048	495.390623776503	591.577596430916	418.619830650678	354.946608120234	642.876301850785	450.30133366214	0.514956497379842	0.000157124512614305	0.00654170597942	Tymp	15	89256134	89261242	-	2037	protein_coding	thymidine phosphorylase [Source:MGI Symbol;Acc:MGI:1920212]	-	597	429	737	822	751	667	439	484	505	513	431	311	19.8284800737588	14.2676435657721	20.9916054050426	22.4480506572185	21.5067959688595	20.3088319122218	13.3391027193945	12.8959838187249	15.4900971266649	18.2378608550067	13.1357497143258
ENSMUSG00000069539	861.165500614888	786.639463501279	737.932339856433	911.832726267026	895.289720173115	1029.01520962442	538.85447794111	475.78532405832	704.337560141642	658.46161318139	626.472832412268	778.371661536977	870.312493339526	630.380578211951	0.466748039523935	0.000157789239594547	0.00654306430115112	Scyl2	10	89474583	89522147	-	10099	protein_coding	SCY1-like 2 (S. cerevisiae) [Source:MGI Symbol;Acc:MGI:1289172]	-	809	732	797	1021	971	1053	551	559	718	571	645	682	5.41971279200065	4.91042064416028	4.57877332823328	5.62399874475274	5.60877043373116	6.46695947114142	3.37696338907977	3.00423279423319	4.44221796181325	4.09454169466943	3.96506185019185
ENSMUSG00000101517	842.004834346572	578.158512791924	776.819614980612	943.09045929283	805.85295101061	648.875687740373	374.557649821134	708.996735135207	441.437189503814	454.350044822185	362.285839519032	634.566926414309	765.800343360487	496.032397535947	0.626564527083734	0.000158394215322716	0.00654306430115112	4732465J04Rik	10	95581939	95633098	+	4005	lncRNA	RIKEN cDNA 4732465J04 gene [Source:MGI Symbol;Acc:MGI:3041208]	-	791	538	839	1056	874	664	383	833	450	394	373	556	13.362265176488	9.10051025355313	12.1542631670555	14.6676062535348	12.7302144362182	10.2829020552832	5.91901416378313	11.2886661091366	7.0204311596432	7.12428464871618	5.78195803313982
ENSMUSG00000032788	1016.57979368012	1021.98651610617	1047.17876584395	1252.09547720506	1239.20636860213	1160.94023649934	652.297525928712	686.867185179006	688.642015625951	1020.55784179602	982.931017676303	855.980566206353	1122.99785965613	814.546025402058	0.464521008240609	0.000159288082237761	0.00654306430115112	Pdxk	10	78272578	78300809	-	5397	protein_coding	pyridoxal (pyridoxine, vitamin B6) kinase [Source:MGI Symbol;Acc:MGI:1351869]	-	955	951	1131	1402	1344	1188	667	807	702	885	1012	750	11.9717344936918	11.937519305704	12.1584827234767	14.4508515866103	14.5269237741029	13.652562167769	7.64938538101364	8.1156117740133	8.12715393722787	11.8751311435597	11.6411723253052
ENSMUSG00000056608	967.613646549979	983.299329376599	1162.91470371353	1371.76794078957	906.35406274992	1149.21356744379	627.848593172763	575.368298861224	911.322553442319	896.015189915832	600.248388264778	906.198092757125	1090.1938751039	752.83351940234	0.535527074427758	0.000161262591853557	0.00657940629454343	Chd9	8	91554980	91781144	+	23148	protein_coding	chromodomain helicase DNA binding protein 9 [Source:MGI Symbol;Acc:MGI:1924001]	-	909	915	1256	1536	983	1176	642	676	929	777	618	794	2.65678574634116	2.67789539514076	3.14807710492322	3.69126808020527	2.47723296827439	3.1509679680449	1.71662202353037	1.58501497284006	2.50758712938681	2.43083290725911	1.65746217117919
ENSMUSG00000027993	506.693174651034	247.168137438926	358.318463644215	313.470408344492	366.96736213069	439.750089583084	320.769997758047	211.081861120686	221.699566284138	238.706749437036	112.667982263292	198.587491359874	372.061272632074	217.252274703845	0.776190467477531	0.000161779897488366	0.00657940629454343	Trim2	3	84067746	84214184	-	19751	protein_coding	tripartite motif-containing 2 [Source:MGI Symbol;Acc:MGI:1933163]	-	476	230	387	351	398	450	328	248	226	207	116	174	1.63051195264437	0.788905048152516	1.136818339569	0.988589225101461	1.17549501066235	1.41310217548343	1.02786926558262	0.681495101786684	0.714945837400959	0.758977354837835	0.364617512567131
ENSMUSG00000052133	671.687800850426	764.071937909029	960.145340566024	826.990308054129	591.942327859053	848.229061684704	249.379114110677	194.059130385147	411.027072004663	678.065549125494	207.85300176159	383.479293660446	777.177796153894	353.977193508003	1.13583847564941	0.000166053187621365	0.0067087672709395	Sema5b	16	35361515	35485102	+	7080	protein_coding	sema domain, seven thrombospondin repeats (type 1 and type 1-like), transmembrane domain (TM) and short cytoplasmic domain, (semaphorin) 5B [Source:MGI Symbol;Acc:MGI:107555]	-	631	711	1037	926	642	868	255	228	419	588	214	336	6.02979051977534	6.80334243669179	8.49796022158936	7.27571324741679	5.28966997966176	7.60390369334611	2.22925653483413	1.74784024981128	3.69772455330868	6.01439060865227	1.87650246567878
ENSMUSG00000039929	179.897366630304	184.838781041284	232.397763242114	174.150226858051	220.364822988027	209.125598157289	136.914023433313	68.0909229421567	110.849783142069	170.669559983968	107.81160371746	135.815583171408	200.129093152845	121.691912731729	0.723378839117262	0.000177120359045985	0.00708596824039994	Urb1	16	90548415	90607301	-	8190	protein_coding	URB1 ribosome biogenesis 1 homolog (S. cerevisiae) [Source:MGI Symbol;Acc:MGI:2146468]	-	169	172	251	195	239	214	140	80	113	148	111	119	1.39607556521551	1.42275635198937	1.77811159863818	1.32448960690401	1.70231845042873	1.62061558772114	1.05802823976039	0.530159114395557	0.862081516148128	1.30865562270443	0.841410061122887
ENSMUSG00000041058	2264.15206403939	2484.57710329912	2740.62700875162	2819.44751892752	2429.5452241567	2933.62170872982	1551.04029403739	1829.94355407046	1778.50138793426	2325.94934113286	1939.63759120512	2402.45212248583	2611.9951046507	1971.25404847765	0.406698957466442	0.000182372555671002	0.00724886643608817	Wwp1	4	19608303	19708993	-	6453	protein_coding	WW domain containing E3 ubiquitin protein ligase 1 [Source:MGI Symbol;Acc:MGI:1861728]	-	2127	2312	2960	3157	2635	3002	1586	2150	1813	2017	1997	2105	22.3003637919684	24.2723682663349	26.6133313445898	27.2151518577143	23.8202196294447	28.8535439385834	15.2122916648394	18.0832689559781	17.5545592844653	22.6355887500971	19.2125505644991
ENSMUSG00000109032	20.2251477276673	9.67179668239277	12.9624250413928	18.7546398154824	23.9727422497436	14.6583363194361	0.977957310237949	0	5.88582919338419	6.91903621556627	0	2.28261484321694	16.7075146393525	2.67757292706756	2.68290707311275	0.000184317935223089	1	Gm7972	9	75375855	75393963	+	3280	transcribed_unprocessed_pseudogene	predicted gene 7972 [Source:MGI Symbol;Acc:MGI:3647337]	-	19	9	14	21	26	15	1	0	6	6	0	2	0.391909580572928	0.185889412055333	0.247641477868834	0.356158485758945	0.46240903514937	0.283640051503792	0.0188703207396289	0	0.114296043879557	0.132472267014865	0
ENSMUSG00000020102	4191.92798692389	3673.13345115761	4636.8446148068	4149.24078965387	4511.48568569213	3996.83970309958	2251.25772816776	2461.48686435896	3567.79346272305	3664.78284884493	2585.53593780071	3740.06442061096	4193.24537188898	3045.15354375106	0.461959576895236	0.000187037226748993	0.00737149862016628	Slc16a7	10	125055139	125225334	-	11839	protein_coding	solute carrier family 16 (monocarboxylic acid transporters), member 7 [Source:MGI Symbol;Acc:MGI:1330284]	-	3938	3418	5008	4646	4893	4090	2302	2892	3637	3178	2662	3277	22.5043676555697	19.5588369337577	24.5424827713981	21.8304169249425	24.1094332989196	21.4268548522323	12.0349260042075	13.258164858554	19.194732860532	19.4395601514799	13.9592361498664
ENSMUSG00000017950	14785.6474703842	13272.9289804703	13587.3991058885	15571.7095153691	14174.3448694349	17245.044068606	11214.2364764986	11368.6307217298	13657.0856717158	12118.6919315643	10055.6174169988	12420.848669365	14772.8456683588	11805.8518146454	0.323493986765457	0.000187127325806291	0.00737149862016628	Hnf4a	2	163348728	163414830	+	4828	protein_coding	hepatic nuclear factor 4, alpha [Source:MGI Symbol;Acc:MGI:109128]	RXR-like	13890	12351	14675	17436	15373	17647	11467	13357	13922	10509	10353	10883	194.644038756793	173.308893050008	176.351859624489	200.898846936846	185.745445154166	226.701171548616	147.006208529815	150.155696026145	180.172356913943	157.631022414879	133.127438648751
ENSMUSG00000056698	807.941427647342	745.802988620065	794.411477536788	723.39325002575	889.757548884713	839.434059893042	391.182924095179	317.473928217806	590.544862402881	791.076473979744	293.325264168225	575.218940490669	800.12345876795	493.137065559084	0.699990236145346	0.000187506676851496	0.00737149862016628	Elmod3	6	72542905	72575396	-	3560	protein_coding	ELMO/CED-12 domain containing 3 [Source:MGI Symbol;Acc:MGI:2445168]	-	759	694	858	810	965	859	400	373	602	686	302	504	14.4244047756936	13.2067349079212	13.9831972848633	12.6570607940659	15.8126304889238	14.9655714964975	6.9544552838183	5.68668249225265	10.565748895263	13.9547377605247	5.26654220310792
ENSMUSG00000027513	91020.6161447184	80314.5996505896	103842.912894101	101821.618792513	79249.2757349119	93653.0879672987	47418.2161015074	68778.6412638725	67052.3471425649	61020.1335577815	52482.8829448014	94987.5927782081	91650.3518640221	65289.9689647893	0.489289730660632	0.000187858579067908	0.00737149862016628	Pck1	2	172994841	173001066	+	3429	protein_coding	phosphoenolpyruvate carboxykinase 1, cytosolic [Source:MGI Symbol;Acc:MGI:97501]	-	85507	74736	112155	114012	85951	95836	48487	80808	68353	52915	54035	83227	1687.09798805608	1476.55066284064	1897.66850471281	1849.61323435937	1462.2117039595	1733.45005854008	875.207346976913	1279.04852105083	1245.50044514153	1117.52919363373	978.309553191588
ENSMUSG00000082676	156.478774524584	111.762983885428	71.2933377276604	61.6223879651565	130.928053825523	48.8611210647871	31.2946339276144	34.8965980078553	43.1627474181507	57.6586351297189	35.9372012391534	61.6306007668574	96.824443165523	44.0967360815583	1.13855587719484	0.00018993385980991	0.00742919638912519	Gm11843	4	12131551	12131975	-	425	processed_pseudogene	predicted gene 11843 [Source:MGI Symbol;Acc:MGI:3651166]	-	147	104	77	69	142	50	32	41	44	50	37	54	23.4010059899744	16.5779336575987	10.5116523782442	9.03146089601842	19.4906454489747	7.29677936417599	4.66030321136812	5.23594497126129	6.46870786380301	8.51978501585796	5.40482227497761
ENSMUSG00000044026	586.529284102353	586.755665398495	649.973027075554	943.09045929283	606.694784628125	817.935166624536	281.651705348529	483.445552889313	511.086168292194	523.540406977848	242.818927291577	538.697102999198	698.496397853649	430.206643966443	0.700276581698954	0.000192795330329139	0.00751718173683329	Slc35g1	19	38384428	38394058	+	4642	protein_coding	solute carrier family 35, member G1 [Source:MGI Symbol;Acc:MGI:2444789]	-	551	546	702	1056	658	837	288	568	521	454	250	472	8.03068489963312	7.96844344539362	8.77407154061769	12.6548390877654	8.26889666275127	11.183312534776	3.84008181462367	6.64115087095804	7.01271806207444	7.08269073162341	3.34351669664969
ENSMUSG00000120501	8.5158516748073	0	5.55532501773977	12.5030932103216	0	26.385005374985	0	0	0	0	0	0	8.82654587964228	0	5.57494862337741	0.000193210667671169	1	ENSMUSG00000120501	8	35877458	35882554	-	1831	lncRNA	novel transcript	-	8	0	6	14	0	27	0	0	0	0	0	0	0.295602270666982	0	0.190121880489142	0.425341282828815	0	0.914588128934129	0	0	0	0	0
ENSMUSG00000042102	10114.7028267524	10187.6258387871	9994.95559441681	10340.058084936	10223.4525409676	9848.44756181848	7199.72171797178	7143.58895316901	8362.78231226671	8442.37735569344	8591.90492328515	9788.99375513585	10118.207074613	8254.89483625366	0.293800954017782	0.000195643153078783	0.00760407976618232	Dmgdh	13	93810941	93889341	+	3414	protein_coding	dimethylglycine dehydrogenase precursor [Source:MGI Symbol;Acc:MGI:1921379]	-	9502	9480	10795	11578	11088	10078	7362	8393	8525	7321	8846	8577	188.303170497657	188.118197429322	183.45448137477	188.654806118001	189.45955265755	183.08846241166	133.470541363587	133.430112814618	156.021576789698	155.29391970103	160.861473296696
ENSMUSG00000032012	1684.00966869314	1390.58943411292	1375.86882939355	1368.19562844376	1591.42127396375	1287.00192884649	933.949231277241	835.816079114973	1180.10875327353	1330.76129879391	878.033241086341	1213.2097891698	1449.5144605756	1061.9797321193	0.449743634670405	0.000200216748345901	0.00770865863067196	Nectin1	9	43655281	43743955	+	6562	protein_coding	nectin cell adhesion molecule 1 [Source:MGI Symbol;Acc:MGI:1926483]	-	1582	1294	1486	1532	1726	1317	955	982	1203	1154	904	1063	16.310841826222	13.3593103284007	13.1386813085179	12.9873452097884	15.3437450033434	12.4480031381085	9.00783186297069	8.12223234199828	11.454686116573	12.7355335599742	8.55265252867203
ENSMUSG00000003746	5866.35732248288	5522.59590564627	6189.55795726506	6550.72776412207	6457.88795066169	6068.55123624656	4365.6014329022	4559.53842751417	5602.32842056952	5028.98615601408	4444.55764514502	5593.54767330311	6109.27968940409	4932.42662590802	0.308969781226489	0.00020483914398068	0.00780507433476688	Man1a	10	53780881	53952705	-	9647	protein_coding	mannosidase 1, alpha [Source:MGI Symbol;Acc:MGI:104677]	-	5511	5139	6685	7335	7004	6210	4464	5357	5711	4361	4576	4901	38.6495334311878	36.088790510023	40.204839083463	42.2966220792909	42.3526574765	39.925417097339	28.6407926447587	30.1390469290209	36.9890922503606	32.7371878159356	29.448444581221
ENSMUSG00000037643	368.310584935416	370.75220615839	492.572151572927	471.545229646415	408.458646793708	401.63841515255	234.709754457108	243.42504951821	293.310488136979	371.32161023539	250.589132964907	353.805300698626	418.879539043234	291.19355600187	0.528259513058584	0.000208698281734528	0.00791121079093664	Prkci	3	31049896	31107108	+	5551	protein_coding	protein kinase C, iota [Source:MGI Symbol;Acc:MGI:99260]	-	346	345	532	528	443	411	240	286	299	322	258	310	4.21707179171704	4.21050178510008	5.56044564971563	5.29127752165437	4.65542469432701	4.59219937105906	2.67604332304736	2.79637205011099	3.36553222102802	4.20080194350626	2.885473581343
ENSMUSG00000020087	2471.72594861282	2559.80218860662	2374.90144508375	2580.99566984496	2393.58611078209	2553.48218684577	1864.96459062377	2010.38449986718	1801.06373317556	2432.04122977154	1753.15265504518	2130.82095614301	2489.082258296	1998.73794410437	0.317038249720681	0.000217671703036297	0.00822593717084458	Tysnd1	10	61531293	61538552	+	2286	protein_coding	trypsin domain containing 1 [Source:MGI Symbol;Acc:MGI:1919017]	-	2322	2382	2565	2890	2596	2613	1907	2362	1836	2109	1805	1867	68.7214180406206	70.5913551478484	65.0999025623695	70.3265741408614	66.2453301906701	70.8946273263477	51.6330277399604	56.0794588417371	50.1822630450716	66.8109912890541	49.0195820350925
ENSMUSG00000031700	16000.2208155036	17194.3052131427	16539.1284653143	17349.8279854941	14639.0472576607	16227.7555280371	10904.2240091531	10728.5760460736	14360.4422603252	13037.770575532	13740.6374575757	14976.2359863463	16325.0475441921	12957.9810558343	0.333318546832664	0.000218497898288787	0.00822593717084458	Gpt2	8	86219205	86254189	+	5643	protein_coding	glutamic pyruvate transaminase (alanine aminotransferase) 2 [Source:MGI Symbol;Acc:MGI:1915391]	-	15031	16000	17863	19427	15877	16606	11150	12605	14639	11306	14147	13122	180.212100043283	192.086091808216	183.659561515921	191.510916696725	164.128953935429	182.51775722715	122.297602355079	121.236376188795	162.089600662688	145.093010776	155.640610982973
ENSMUSG00000066036	3481.91885353683	3067.03419239433	3263.75344792212	4299.27790817773	3634.63653648035	3905.95801791908	2466.40833642011	2677.67554470031	2313.13087299999	3348.81352833408	2934.22391739141	2902.34477315034	3608.76315940507	2773.76616216604	0.380054924797689	0.000219010051690781	0.00822593717084458	Ubr4	4	139079920	139216899	+	17997	protein_coding	ubiquitin protein ligase E3 component n-recognin 4 [Source:MGI Symbol;Acc:MGI:1916366]	-	3271	2854	3525	4814	3942	3997	2522	3146	2358	2904	3021	2543	12.2966426007179	10.7433528611523	11.3639208404554	14.8800302628609	12.7774241140893	13.7747641555924	8.67357406287319	9.48765203933029	8.18648510321188	11.6854127538722	10.421236030931
ENSMUSG00000021051	1216.70230803809	1419.60482416009	1388.83125443494	1720.06839450567	1338.78545179337	1557.69253954541	1062.06163891841	1133.71386698691	1200.70915545038	1025.1705326064	1191.75529514706	1196.09017784568	1440.28079541293	1134.91677782581	0.343971493377323	0.000221630549750884	0.0082940326106709	Ppp2r5e	12	75497655	75643019	-	5343	protein_coding	protein phosphatase 2, regulatory subunit B', epsilon [Source:MGI Symbol;Acc:MGI:1349473]	-	1143	1321	1500	1926	1452	1594	1086	1332	1224	889	1227	1048	14.4732871730954	16.7495688170672	16.2882820127091	20.0525197981807	15.8528828117377	18.5034743786675	12.5804963691217	13.5306667407596	14.3136381958992	12.0493646775839	14.2569954921769
ENSMUSG00000027523	670.623319391075	677.025767767494	685.156752187906	751.971748792199	691.521411050295	749.529597133834	424.43347264327	611.967169942633	639.593439014416	524.693579680442	518.661228694808	415.435901465483	704.3047660538	522.464131906842	0.429818489856351	0.000223848998432958	0.00833125272349574	Gnas	2	174126113	174188537	+	11387	protein_coding	GNAS (guanine nucleotide binding protein, alpha stimulating) complex locus [Source:MGI Symbol;Acc:MGI:95777]	-	630	630	740	842	750	767	434	719	652	455	534	364	3.74315104156586	3.74815219178927	3.77043618087816	4.11339689633385	3.84218922545767	4.17768973959299	2.35903038370744	3.42704428583123	3.57760234769277	2.89367423806364	2.9113911675148
ENSMUSG00000022388	24.483073565071	51.5829156394281	62.9603502010508	98.2385895096698	59.0098270762918	45.9294538008999	14.6693596535692	12.7670480516544	24.5242883057675	33.442008375237	5.82765425499784	31.9566078050372	57.0340349654019	20.5311610743772	1.48829020233753	0.00023624433700248	0.00871337221340677	Ttll8	15	88774836	88838621	-	3428	protein_coding	tubulin tyrosine ligase-like family, member 8 [Source:MGI Symbol;Acc:MGI:1922902]	-	23	48	68	110	64	47	15	15	25	29	6	28	0.453934452472237	0.94860719026292	1.15089921703335	1.78504725317869	1.08909551048555	0.850368540253299	0.270834241653951	0.237492879242613	0.45567267591033	0.612639150060965	0.108662341931257
ENSMUSG00000073988	9943.32131179687	9579.37729187213	10194.9472950554	11457.2987710868	10677.0905866166	11784.3251784054	7803.12137838859	7924.93229393026	10124.607184153	8511.56771784911	7205.89448630483	9180.67689941853	10606.0600724722	8458.46666000739	0.326522089425295	0.000237824327673397	0.00874538440863671	Ttpa	4	20007938	20030785	+	3488	protein_coding	tocopherol (alpha) transfer protein [Source:MGI Symbol;Acc:MGI:1354168]	-	9341	8914	11011	12829	11580	12059	7979	9311	10321	7381	7419	8044	181.18532481579	173.13391177755	183.155296240765	204.604025519727	193.668455988195	214.429710434944	141.587565514713	144.883856439157	184.883899939286	153.244992034806	132.049730308355
ENSMUSG00000039782	1363.60074942852	1083.24122842799	1506.41896731044	1815.62774975599	1182.04059862197	1240.0952526243	384.337222923514	514.93760475006	686.680072561489	973.277760989655	473.982546073158	1087.66597279287	1365.17075769487	686.813530015125	0.99183709482566	0.000244060177524829	0.00889479851738857	Cpeb2	5	43390513	43447067	+	7816	protein_coding	cytoplasmic polyadenylation element binding protein 2 [Source:MGI Symbol;Acc:MGI:2442640]	-	1281	1008	1627	2033	1282	1269	393	605	700	844	488	953	11.088446415596	8.73699263211964	12.0773651587924	14.4694050121681	9.56820081313329	10.069947621761	3.11215433037504	4.20117691893914	5.59586567612297	7.81997667653083	3.87617963093846
ENSMUSG00000105802	89.4164425854766	147.226238387534	182.399838082456	141.106337659344	147.52456769073	136.811138981404	69.4349690268944	57.8772845008332	45.1246904826121	92.2538162075503	62.1616453866436	127.826431220149	140.747427231157	75.7798061374471	0.90048059055548	0.000246654907706028	0.00891004581307483	Gm43012	5	137335671	137336607	+	937	TEC	predicted gene 43012 [Source:MGI Symbol;Acc:MGI:5663149]	-	84	137	197	158	160	140	71	68	46	80	64	112	6.06520966350914	9.90528473866766	12.198202267093	9.3802700441996	9.96109767861379	9.26698766634945	4.6899896412431	3.93885023998364	3.06741143730835	6.18298165505167	4.24042129508757
ENSMUSG00000042699	969.742609468681	875.834921794457	1148.10050366622	1227.08929078442	999.478946104693	1159.96301407805	767.69648853679	687.718321715783	788.701111913482	869.492217756161	922.711923707992	853.697951363136	1063.36821431609	815.003002498891	0.385018711811816	0.000253362951323577	0.00907231419287512	Dhx9	1	153331504	153363406	-	9603	protein_coding	DEAH (Asp-Glu-Ala-His) box polypeptide 9 [Source:MGI Symbol;Acc:MGI:108177]	-	911	815	1240	1374	1084	1187	785	808	804	754	950	748	6.4182639170783	5.74958723901461	7.49176164285061	7.95935085236038	6.58489964135521	7.66644334008681	5.05959615124405	4.56672204349537	5.23121911964416	5.68606707972859	6.14165335022616
ENSMUSG00000020108	624.850616638985	242.869561135641	343.504263596909	247.382629947077	229.585108468698	308.802285129454	113.443047987602	250.234141812426	153.031559027989	162.597351065807	109.754155135793	259.076784705123	332.832410819461	174.689506622457	0.929506499741535	0.000262537432605484	0.00936018536690479	Ddit4	10	59785491	59787656	-	1755	protein_coding	DNA-damage-inducible transcript 4 [Source:MGI Symbol;Acc:MGI:1921997]	-	587	226	371	277	249	316	116	294	156	141	113	227	22.6290907198049	8.72403313506661	12.2649557016291	8.78012084713463	8.27654409790036	11.1676064798728	4.09104252707351	9.0922288118838	5.5539410951844	5.81821216040214	3.99732947956879
ENSMUSG00000015312	234.185921057201	74.1504412316779	80.5522127572267	105.383214201282	76.528369489566	85.9955730740253	32.2725912378523	62.9841037214949	43.1627474181507	58.8118078323133	7.77020567333046	49.0762191291642	109.46595530183	42.3462791687177	1.36999279102316	0.000263561316620884	0.00936018536690479	Gadd45b	10	80765907	80768038	+	1589	protein_coding	growth arrest and DNA-damage-inducible 45 beta [Source:MGI Symbol;Acc:MGI:107776]	-	220	69	87	118	83	88	33	74	44	51	8	43	9.36709460903664	2.94178670976596	3.17661476780772	4.13100723210591	3.04705997310995	3.43485900843527	1.28541442218844	2.52759780420525	1.73014527508891	2.32430887625829	0.312560946625004
ENSMUSG00000120025	45.7727027520892	7.52250853074993	20.3695250650458	26.7923425935463	29.5049135381459	52.7700107499701	0	12.7670480516544	9.80971532230699	5.76586351297189	2.91382712749892	10.2717667944762	30.4553338715912	6.92137013481807	2.13386536757414	0.000263835875026333	1	ENSMUSG00000120025	8	127320858	127321308	-	451	lncRNA	novel transcript	-	43	7	22	30	32	54	0	15	10	5	3	9	6.45056917306638	1.05149566415138	2.83018831850096	3.70034790398904	4.13904590902932	7.42621225755384	0	1.80515651894385	1.38540659247948	0.802862224332513	0.412965086630098
ENSMUSG00000025870	108.577108853793	64.4786445492851	92.5887502956629	58.0500756193503	82.0605407779683	82.0866833888423	46.9419508914215	41.705690302071	34.3340036280745	50.7395989141527	43.7074069124838	53.6414488155981	81.3069672474837	45.1783499106336	0.850570104806037	0.000269902101598169	0.00944426670036668	Arl10	13	54722828	54728941	+	1729	protein_coding	ADP-ribosylation factor-like 10 [Source:MGI Symbol;Acc:MGI:1930788]	-	102	60	100	65	89	84	48	49	35	44	45	47	3.99127178096493	2.35094378847693	3.35563103118969	2.09129937932213	3.00276828626605	3.01324491961924	1.71830150216725	1.53815900952921	1.26481452066446	1.84291474605603	1.61579456972389
ENSMUSG00000032602	3666.07414600454	3423.81602556704	3764.65858702165	3792.00955507325	3557.18613844272	3730.05798208585	2057.62218074064	2311.68683388622	3541.30723135282	3248.48750320836	2202.85330838918	2895.49692862069	3655.63373903251	2709.57566436632	0.432374245479001	0.000277309573137918	0.00967589823090883	Slc25a20	9	108539287	108561840	+	4844	protein_coding	solute carrier family 25 (mitochondrial carnitine/acylcarnitine translocase), member 20 [Source:MGI Symbol;Acc:MGI:1928738]	-	3444	3186	4066	4246	3858	3817	2104	2716	3610	2817	2268	2537	48.1022212310138	44.5581986221487	48.7003895359229	48.7611231582177	46.4606087542762	48.8729062925285	26.8840519947704	30.4316694544264	46.5647053526376	42.1143667035943	29.0674905196226
ENSMUSG00000040648	771.749058029411	743.653700468422	943.479365512805	1131.52993553411	780.9581802128	1040.74187867996	539.832435251348	296.195514798382	699.432702480488	713.81390290592	544.885672842298	704.186679132426	902.018686406251	583.05781790181	0.631092807135168	0.000279200000557797	0.00971426177578149	Ppip5k2	1	97633773	97698136	-	14381	protein_coding	diphosphoinositol pentakisphosphate kinase 2 [Source:MGI Symbol;Acc:MGI:2142810]	-	725	692	1019	1267	847	1065	552	348	713	619	561	617	3.41079048965347	3.25989037933317	4.11106452119643	4.90100757539741	3.43574664512089	4.59315035075469	2.3757630149741	1.31337971552836	3.0978061337701	3.11708844036831	2.42182299639264
ENSMUSG00000021676	6943.612559346	6697.18188051909	7907.07927524961	8067.17435491679	7996.75359738561	8602.48897466641	5354.31627355277	5351.94654325352	6267.42711942193	6832.54826287169	6449.27070886428	6745.12686170606	7702.38177368059	6166.77262827838	0.321044264653946	0.000280264732589501	0.00972376114594422	Iqgap2	13	95763682	96028991	-	6910	protein_coding	IQ motif containing GTPase activating protein 2 [Source:MGI Symbol;Acc:MGI:2449975]	-	6523	6232	8540	9033	8673	8803	5475	6288	6389	5925	6640	5910	63.8668437548424	61.0991805153011	71.7049303791553	72.7196547040356	73.2180412048847	79.0137719702099	49.0409869525697	49.3895003395527	57.7708333781111	62.0951769697752	59.6566216606829
ENSMUSG00000120209	44.7082212927383	19.3435933647855	41.6649376330483	55.3708413599957	52.5556272398224	7.81777937036593	6.84570117166564	21.278413419424	4.90485766115349	16.1444178363213	5.82765425499784	4.56522968643388	36.910166710126	9.92771233833269	1.88907552481881	0.000299164349713261	1	ENSMUSG00000120209	15	75083735	75088042	-	691	lncRNA	novel transcript	-	42	18	45	62	57	8	7	25	5	14	6	4	4.11222970673521	1.76473884671922	3.77836284199296	4.99127487174826	4.81197780315742	0.718062223971009	0.627008052361621	1.963641075841	0.452111702755604	1.46722781025629	0.539065858379665
ENSMUSG00000033161	10949.2562908835	12118.7612430381	11556.0019244017	12471.8354772958	11967.0085253624	11510.7029004425	8175.72311358925	9387.18486411308	10576.8350605114	9859.62660718194	9864.27610229301	10752.2572189734	11762.2610602373	9769.31716111034	0.267928884987973	0.000302721464387495	0.0104146359260706	Atp1a1	3	101483535	101512000	-	4568	protein_coding	ATPase, Na+/K+ transporting, alpha 1 polypeptide [Source:MGI Symbol;Acc:MGI:88105]	-	10286	11277	12481	13965	12979	11779	8360	11029	10782	8550	10156	9421	152.34441863462	167.245127242007	158.523073175529	170.064117586999	165.745575613196	159.930931504016	113.274800993261	131.041902110212	147.477926881158	135.546273210919	138.02737247057
ENSMUSG00000030643	707.880170468357	530.874173455781	644.417702057814	686.777048481237	805.85295101061	666.465691323696	394.116796025893	304.706880166151	611.145264579725	554.676069947896	228.249791654082	453.099046378563	673.711289466249	424.332308125385	0.668323606581205	0.000306874251160462	0.0105280155104827	Rab30	7	92390811	92493743	+	9642	protein_coding	RAB30, member RAS oncogene family [Source:MGI Symbol;Acc:MGI:1923235]	-	665	494	696	769	874	682	403	358	623	481	235	397	4.66617090331593	3.47092963817439	4.18804469284087	4.4366692930705	5.28775241827981	4.38699750820662	2.58696792848694	2.01519021804353	4.03714837698337	3.61264686137059	1.51310601903101
ENSMUSG00000028838	581.206876805598	513.679868242638	605.530426933635	513.519899709637	616.837098656863	581.447340670966	270.894174935912	144.693211252083	322.7396341039	529.30627049082	312.750778351551	461.088198329822	568.70358516989	340.245377910681	0.743767679856622	0.000310072078297405	0.0105398745363599	Extl1	4	134083683	134111161	-	4333	protein_coding	exostosin-like glycosyltransferase 1 [Source:MGI Symbol;Acc:MGI:1888742]	-	546	478	654	575	669	595	277	170	329	459	322	404	8.52530797498325	7.47351990657828	8.75705857053828	7.38205031311606	9.00666969064749	8.51683859550429	3.95680097188951	2.12941534437149	4.74417827799475	7.67134577414489	4.61355610513086
ENSMUSG00000025340	517.337989244543	384.722579144068	456.462538957618	467.079839214157	413.99081808211	570.697894036713	227.864053285442	297.046651335159	364.92140998982	402.457273205438	188.427487578264	358.37053038506	468.381943113202	306.514567629864	0.613384895241089	0.000311303561720358	0.0105398745363599	Rabgef1	5	130200639	130243183	+	4168	protein_coding	RAB guanine nucleotide exchange factor (GEF) 1 [Source:MGI Symbol;Acc:MGI:1929459]	-	486	358	493	523	449	584	233	349	372	349	194	314	7.88886786796259	5.81890550255529	6.86259554724807	6.98026360490728	6.28413400861121	8.69031016405222	3.46004172794002	4.54462301543895	5.57659392594691	6.06380572205917	2.88963270070488
ENSMUSG00000001802	939.937128606855	1109.0326862477	1032.36456579664	923.442741390896	1152.53568508383	862.88739800414	663.055056341329	837.518352188527	751.424193688715	837.203382083519	794.503530098039	824.023958401315	1003.36670085501	784.621412133574	0.354985759365031	0.000311328149874356	0.0105398745363599	Lrp3	7	34899452	34914923	-	4700	protein_coding	low density lipoprotein receptor-related protein 3 [Source:MGI Symbol;Acc:MGI:3584516]	-	883	1032	1115	1034	1250	883	678	984	766	726	818	722	12.7106853710923	14.8753717312251	13.7640488276884	12.2382839677931	15.5145420958463	11.65233564209	8.92863278162051	11.363114618482	10.1832100825003	11.1862964537999	10.8049825410924
ENSMUSG00000037697	390.664695581785	293.377832699247	333.319501064386	355.445078407714	352.214905361617	361.572295879424	258.180729902818	234.913684150441	300.177288862594	292.905866458972	210.766828889089	227.120176900086	347.765718165696	254.010762527333	0.454211884915426	0.000329414567562636	0.011016350602665	Ddhd1	14	45825924	45895600	-	14076	protein_coding	DDHD domain containing 1 [Source:MGI Symbol;Acc:MGI:2150302]	-	367	273	360	398	382	370	264	276	306	254	217	199	1.76397704457931	1.31392137231874	1.48385832555677	1.57290197989539	1.58310934236331	1.63031906083642	1.1608545137013	1.06421645757343	1.35830081132227	1.30677861958208	0.957081891949129
ENSMUSG00000030513	4430.3718338185	4524.25155920818	4578.51370212053	4323.39101651192	4534.5363993938	4449.29368415951	2769.57510259387	2898.11990772554	4015.11648142025	3974.98630584282	3475.22448739705	3958.05413813817	4473.39303253541	3515.17940385295	0.348100450562465	0.0003300779206791	0.011016350602665	Pcsk6	7	65511482	65700134	+	5190	protein_coding	proprotein convertase subtilisin/kexin type 6 [Source:MGI Symbol;Acc:MGI:102897]	-	4162	4210	4945	4841	4918	4553	2832	3405	4093	3447	3578	3468	54.2551340822437	54.9541792590383	55.2800125852098	51.8878373516258	55.2774465863042	54.4102138310777	33.773729197993	35.6081905471897	49.2751753668853	48.0973874898132	42.7997864523496
ENSMUSG00000021240	514.144544866491	543.769902365638	601.826876921809	668.022408665754	587.332185118717	673.306248272766	263.070516454008	274.065964842181	499.314509905426	455.503217524779	283.612507076562	547.827562372066	598.067027701863	387.232379695837	0.629301479590814	0.000334674390717296	0.0110843111417515	Abcd4	12	84648238	84664187	-	8006	protein_coding	ATP-binding cassette, sub-family D (ALD), member 4 [Source:MGI Symbol;Acc:MGI:1349217]	-	483	506	650	748	637	689	269	322	509	395	292	480	4.0816679196317	4.28174618203007	4.71049954334565	5.19737265681944	4.64141769480432	5.33769527183321	2.07964793841986	2.18293313343379	3.97242757885332	3.57296754818175	2.26431002533479
ENSMUSG00000000686	713.202577765111	821.028073927564	704.600389749995	877.002680895416	619.603184301064	917.611853596702	451.816277329932	387.267124233516	599.373606192957	664.227476694362	615.788799611439	582.06678502032	775.508126705975	550.090011513754	0.496730847817262	0.000343492871017431	0.0113408049511723	Abhd15	11	77405947	77429433	+	3035	protein_coding	abhydrolase domain containing 15 [Source:MGI Symbol;Acc:MGI:1914727]	-	670	764	761	982	672	939	462	455	611	576	634	510	14.9355847440747	17.0537798080798	14.5477274671414	17.9990936893407	12.9162780245195	19.1892074119179	9.42185477298323	8.13678513937118	12.5787158494312	13.7439431425504	12.9687818869292
ENSMUSG00000042744	965.484683631277	917.746040751492	849.964727714186	1096.6998901625	897.133777269249	1156.05412439286	695.327647579182	645.161494876935	560.134744903729	825.671655057575	842.096039847188	819.458728714882	980.513873986927	731.308385163248	0.424021715868257	0.000351351616137671	0.0115667878183362	Hectd4	5	121358282	121506640	+	16443	protein_coding	HECT domain E3 ubiquitin protein ligase 4 [Source:MGI Symbol;Acc:MGI:3647820]	-	907	854	918	1228	973	1183	711	758	571	716	867	718	3.73192024064388	3.51854250641228	3.23914820688862	4.15446548474617	3.4519030570341	4.46224927911401	2.67634237003429	2.50200570558133	2.16974573436665	3.15340336961087	3.2734571809451
ENSMUSG00000055320	513.08006340714	393.319731750639	399.983401277264	406.350529335452	448.105874360591	508.155659073786	366.733991339231	291.939832114497	305.082146523747	371.32161023539	354.515633845702	303.587774147853	444.832543200812	332.196831367737	0.421593360234804	0.000356127621002948	0.0116020144327804	Tead1	7	112278525	112506014	+	13570	protein_coding	TEA domain family member 1 [Source:MGI Symbol;Acc:MGI:101876]	TEA	482	366	432	455	486	520	375	343	311	322	365	266	2.40310813521536	1.82720479312361	1.84702636320151	1.86521712512422	2.08921544909843	2.37669600513323	1.71042700882414	1.37187461255211	1.43197136380077	1.71839731675779	1.66986607063654
ENSMUSG00000022401	516.273507785192	580.307800943566	562.939601797631	738.575577495426	607.616813176193	723.144591758849	365.756034028993	491.956918257082	444.380104100507	472.800808063695	516.718677276475	483.914346761991	621.476315492809	462.587814748124	0.426614377949122	0.000362365546453187	0.0117120358987843	Xpnpep3	15	81284339	81341683	+	7595	protein_coding	X-prolyl aminopeptidase 3, mitochondrial [Source:MGI Symbol;Acc:MGI:2445217]	-	485	540	608	827	659	740	374	578	453	410	532	424	4.32036146201042	4.8167263057919	4.64456447686583	6.0572510870578	5.06156063025303	6.04302069791534	3.04787358231963	4.13047698964446	3.72669813118282	3.90934177488677	4.34863020256014
ENSMUSG00000026502	512.015581947789	398.692952129747	479.609726531534	509.947587363831	441.651674524122	561.902892245051	193.635547427114	476.636460595097	322.7396341039	321.735184023832	292.353988459058	324.131307736806	483.970069123679	321.872020390968	0.587445745367021	0.000369033970150865	0.011880521066305	Desi2	1	178014983	178084867	+	9156	protein_coding	desumoylating isopeptidase 2 [Source:MGI Symbol;Acc:MGI:1926075]	-	481	371	518	571	479	575	198	560	329	279	301	284	3.55422907658077	2.74507436218986	3.28241259875073	3.46919066762473	3.05180328705799	3.89504250135541	1.33848199007696	3.31957427132998	2.24514247253727	2.20671364843896	2.04093576070782
ENSMUSG00000037519	748.330465923691	694.220072980637	808.299790081137	818.952605276065	707.195896367435	900.021850013378	630.782465103477	499.617147088075	565.039602564883	669.993340207334	613.846248193106	656.25176742487	779.503446773724	605.921761763624	0.365136226227403	0.000369513031047753	0.011880521066305	Ppfia1	7	144030495	144107466	-	12556	protein_coding	protein tyrosine phosphatase, receptor type, f polypeptide (PTPRF), interacting protein (liprin), alpha 1 [Source:MGI Symbol;Acc:MGI:1924750]	-	703	646	873	917	767	921	645	587	576	581	632	575	3.78800148919485	3.48551694998233	4.0339650559137	4.06271047469745	3.56345159613356	4.54944546451511	3.17951979585529	2.53738834743357	2.86632194144592	3.35098425460453	3.12488755899836
ENSMUSG00000056091	10304.1805265168	9063.54813547785	10809.7365970186	14105.2752974157	9014.67311445165	13242.3410309786	2617.01376219675	4476.12704691003	8097.91999856442	6731.06906504339	2419.44779153327	7532.6289826159	11089.9591169765	5312.36777447729	1.06188174232319	0.000376128909553823	0.0119504329627177	St3gal5	6	72074576	72131555	+	2618	protein_coding	ST3 beta-galactoside alpha-2,3-sialyltransferase 5 [Source:MGI Symbol;Acc:MGI:1339963]	-	9680	8434	11675	15794	9777	13551	2676	5259	8255	5837	2491	6600	250.156526617802	218.247834147396	258.735751214371	335.598751627411	217.852616328226	321.034601181652	63.2658857225096	109.026902929455	197.015877419177	161.460990706373	59.0707804798579
ENSMUSG00000032092	508.822137569736	526.575597152495	584.235014365633	500.123728412864	449.027902908658	644.96679805519	350.108717065186	330.24097626946	479.695079260812	423.214381852137	404.050695013184	394.892367876531	535.625196410763	397.033702889551	0.432794730116773	0.000379783774856217	0.0119602674943181	Mpzl2	9	44951097	44965313	+	6968	protein_coding	myelin protein zero-like 2 [Source:MGI Symbol;Acc:MGI:1289160]	-	478	490	631	560	487	660	358	388	489	367	416	346	4.64115291562526	4.76402384001995	5.25400416101739	4.47072266853938	4.07706491425747	5.87470324813825	3.18000651913058	3.02220368290228	4.38484765354236	3.81421776075903	3.70641301632188
ENSMUSG00000018417	3398.88929970746	3422.74138149122	3805.39763715175	4211.75625570548	3529.52528200071	4787.41264192784	2996.46119856907	2417.22776444656	2895.82796314502	3107.80043349185	3344.10226665959	3256.15007384897	3859.28708299741	3002.92828336018	0.362296208602595	0.000382528550840844	0.0120158968322948	Myo1b	1	51788924	51955230	-	10792	protein_coding	myosin IB [Source:MGI Symbol;Acc:MGI:107752]	-	3193	3185	4110	4716	3828	4899	3064	2840	2952	2695	3443	2853	20.017189700575	19.9937145813736	22.0957669361841	24.309146165557	20.6917298422259	28.1550072176922	17.5727588776512	14.2829050884856	17.0910288890914	18.0844120877285	19.8063162763655
ENSMUSG00000034563	3.19344437805274	4.29857630328568	1.85177500591326	6.2515466051608	6.45419983646942	13.6811138981404	0	0	0	0	0	1.14130742160847	5.95510933783705	0.190217903601412	4.52674570004455	0.000384307431355063	1	Ccpg1	9	72892711	72923622	+	7497	protein_coding	cell cycle progression 1 [Source:MGI Symbol;Acc:MGI:1196419]	-	3	4	2	7	7	14	0	0	0	0	0	1	0.0270732171664288	0.0361458522100095	0.015477887296057	0.0519407688981966	0.0544674867230458	0.11582189466946	0	0	0	0	0
ENSMUSG00000049470	1495.59645038803	1315.36434880542	1436.05151708573	1774.54615777922	1532.41144688745	1881.1531609943	1029.78904768056	1105.62636127327	1119.28851827523	1349.21206203542	1223.80739354955	1416.36251021611	1572.52051365669	1207.34764883836	0.38216858292822	0.000387463796810382	0.0121398733480233	Aff4	11	53241660	53312657	+	13450	protein_coding	AF4/FMR2 family, member 4 [Source:MGI Symbol;Acc:MGI:2136171]	AF-4	1405	1224	1551	1987	1662	1925	1053	1299	1141	1170	1260	1241	7.06740798713474	6.16517092413702	6.69050205805928	8.21813796688234	7.20834463211858	8.87684404061931	4.84573000619777	5.24187926377564	5.30050382030192	6.29957338161393	5.81589938360395
ENSMUSG00000085327	5.32240729675456	7.52250853074993	5.55532501773977	7.14462469161235	2.76608564420118	1.95444484259148	0	0	0	0	0	0	5.04423267060821	0	4.76598595953896	0.000387644893153623	1	Gm16104	10	81245348	81247427	+	476	lncRNA	predicted gene 16104 [Source:MGI Symbol;Acc:MGI:3801749]	-	5	7	6	8	3	2	0	0	0	0	0	0	0.710671950618755	0.996270051538385	0.731330174738694	0.934933840167538	0.367655535380559	0.260599263006285	0	0	0	0	0
ENSMUSG00000016239	136.253626796917	94.5686786722849	104.625287834099	93.773199077412	77.4503980376331	134.856694138812	20.5371035149969	16.1715941987622	28.4481744346903	42.667389995992	93.2424680799655	70.7610601397251	106.92131409286	45.3046317273553	1.24282194407952	0.000392608832226083	0.0122697752605617	Lonrf3	X	35592006	35625994	+	3812	protein_coding	LON peptidase N-terminal domain and ring finger 3 [Source:MGI Symbol;Acc:MGI:1921615]	-	128	88	113	105	84	138	21	19	29	37	96	62	2.27176393532526	1.56392444606655	1.71986653720028	1.532266308092	1.28544411740611	2.24531012439099	0.340972637079129	0.270520920091463	0.475334019492107	0.702904613716508	1.56346068474438
ENSMUSG00000086464	10.6448145935091	5.3732203791071	5.55532501773977	8.93078086451543	6.45419983646942	10.7494466342532	0	0	0.980971532230699	2.30634540518876	0	0	7.951297887599	0.547886156236576	3.96627100609567	0.000393684445471131	1	Gm15835	16	4595607	4597318	+	356	lncRNA	predicted gene 15835 [Source:MGI Symbol;Acc:MGI:3801923]	-	10	5	6	10	7	11	0	0	1	2	0	0	1.90044858704791	0.951493869446773	0.977845963976456	1.56260009803282	1.14703019090639	1.91642941165858	0	0	0.17551077899108	0.406843666487599	0
ENSMUSG00000064373	111676.878863423	108254.270977871	125970.698327261	114552.44691488	121949.339824446	114713.208368643	90324.1371735769	89570.20458426	107919.621175296	97942.4171494483	94104.9609097051	107046.646994923	116186.140546087	97817.9979978683	0.248280092650778	0.000395372605451869	0.0123247876653803	Selenop	15	3298029	3309990	+	2842	protein_coding	selenoprotein P [Source:MGI Symbol;Acc:MGI:894288]	-	104912	100735	136054	128267	132262	117387	92360	105236	110013	84933	96888	93793	2497.50988495833	2401.27724406647	2777.51514794133	2510.66465628705	2714.79986584092	2561.80500823064	2011.4672980717	2009.74244883501	2418.65389485428	2164.21275735075	2116.48181472567
ENSMUSG00000024118	2415.30843126722	2601.71330756366	2707.29505864518	2039.79034945532	2296.77311323505	2177.25155464691	1480.62736770025	1449.48552213116	1896.21797180194	2327.10251383546	1479.25290506029	1976.74445422587	2373.02196913556	1768.23845579249	0.424972488413519	0.00039806302372444	0.0123360877671293	Tedc2	17	24434028	24439825	-	2551	protein_coding	tubulin epsilon and delta complex 2 [Source:MGI Symbol;Acc:MGI:1919266]	-	2269	2421	2924	2284	2491	2228	1514	1703	1933	2018	1523	1732	60.1769483523389	64.2939812013569	66.502214107246	49.8062089420181	56.9626356708866	54.1695051347569	36.7340271138134	36.2330035239614	47.3451162450622	57.2872882700947	37.0644933946002
ENSMUSG00000044813	1109.18968064365	1228.31817866388	1193.46899131109	1618.2574926502	1177.43045588164	1672.02756283701	1184.30630269816	923.483142403	982.93347529516	771.472538035639	831.412007046359	1118.4812731763	1333.11539366458	968.681456442436	0.460884268840776	0.000403173232181697	0.0124416423056674	Shb	4	45423278	45532470	-	3199	protein_coding	src homology 2 domain-containing transforming protein B [Source:MGI Symbol;Acc:MGI:98294]	-	1042	1143	1289	1812	1277	1711	1211	1085	1002	669	856	980	22.0373618087714	24.2057185013346	23.3780278906623	31.5095208014451	23.2864595698805	33.1730886786163	23.4305794321555	18.4083831446783	19.5707411676981	15.1446569217494	16.6122381456777
ENSMUSG00000025019	134.124663878215	72.0011530800351	76.8486627454002	200.049491365146	128.161968181321	106.517243921236	19.559146204759	28.9386422504166	39.2388612892279	94.560161612739	45.6499583308164	83.3154417774183	119.617197195226	51.8770352442295	1.21403199733122	0.000409084835806877	0.0125609498834501	Lcor	19	41471076	41574975	+	12765	protein_coding	ligand dependent nuclear receptor corepressor [Source:MGI Symbol;Acc:MGI:2443930]	HTH	126	67	83	224	139	109	20	34	40	82	47	73	0.667814507016224	0.355582166455847	0.377247585110018	0.976169073384485	0.635215063139295	0.529609563721822	0.0969755613411405	0.144563363684476	0.195791107938346	0.465200952295574	0.228583912816247
ENSMUSG00000029201	2633.52713043416	2137.4670668088	1837.88669336891	2249.66369977144	2310.60354145605	1660.30089378147	1603.84998879024	1659.71624671507	1761.82487188634	1664.02820984369	1676.42187402105	1660.60229844032	2138.24150427014	1671.07391494945	0.355498713091681	0.000411064197673398	0.0125902505631538	Ugdh	5	65570564	65593292	-	6752	protein_coding	UDP-glucose dehydrogenase [Source:MGI Symbol;Acc:MGI:1306785]	-	2474	1989	1985	2519	2506	1699	1640	1950	1796	1443	1726	1455	24.7898206509319	19.9566820217224	17.0567888256221	20.7536065508339	21.6508743736134	15.6067001166688	15.0336536319034	15.6748114196798	16.6198726048876	15.4768102950246	15.8700020006477
ENSMUSG00000015970	3228.57226621132	3574.26619618204	3970.20561267803	3768.78952482551	4065.22386842767	3886.41356949316	2929.96010147289	2965.35969413092	2777.13040774511	3014.39344458171	3273.19913989045	3508.37901402444	3748.91183963629	3078.07030030759	0.284807188138744	0.00041544529542668	0.0126927838766928	Chdh	14	29730980	29762484	+	6217	protein_coding	choline dehydrogenase [Source:MGI Symbol;Acc:MGI:1860776]	-	3033	3326	4288	4220	4409	3977	2996	3484	2831	2614	3370	3074	33.0063625698537	36.243269264329	40.0168688997118	37.7597776946545	41.3700493064508	39.6757243069467	29.8273085845013	30.4156726793434	28.4519995906795	30.4489469627389	33.6525251309038
ENSMUSG00000024222	3719.29821897209	3974.03379238761	4619.25275225062	6106.86795515565	3469.59342637635	6403.738526751	999.472371063184	1451.18779520471	3527.57362990159	2310.95809599913	958.649124947145	2894.35562119908	4715.46411198222	2023.69943971914	1.22051071786852	0.000418305999877973	0.0127101791874638	Fkbp5	17	28618068	28736501	-	9468	protein_coding	FK506 binding protein 5 [Source:MGI Symbol;Acc:MGI:104670]	-	3494	3698	4989	6838	3763	6553	1022	1705	3596	2004	987	2536	24.9672537101791	26.4602928010191	30.5720421610189	40.1761847427551	23.1847691560073	42.927150293017	6.68106615658582	9.77386375879784	23.7309555350322	15.3280542839168	6.47183635288206
ENSMUSG00000073563	700.4288002529	727.534039331101	816.632777607747	973.455114232182	778.192094568599	1016.31131814757	451.816277329932	401.736445358724	648.422182804492	668.840167504739	544.885672842298	763.534665056067	835.425690690017	579.872568482709	0.528597950503066	0.000422223832314382	0.0127101791874638	Csnk1g3	18	53995194	54088620	+	4348	protein_coding	casein kinase 1, gamma 3 [Source:MGI Symbol;Acc:MGI:1917675]	-	658	677	882	1090	844	1040	462	472	661	580	561	669	10.238644908436	10.5483643267298	11.7692352775565	13.9455230460133	11.3234748087954	14.8352183945068	6.57666265777463	5.89186259583894	9.49873377853381	9.66019782156848	8.01017399059857
ENSMUSG00000043079	591.851691399107	409.439392887961	347.207813608736	386.702811433518	461.01427403353	424.114530842352	221.996309424014	218.742089951678	330.587406361745	446.277835904024	171.915800522436	230.544099164911	436.721752367534	270.010590221468	0.695122402701337	0.000425926432044467	0.0127590937521223	Synpo	18	60727045	60793214	-	9533	protein_coding	synaptopodin [Source:MGI Symbol;Acc:MGI:1099446]	-	556	381	375	433	500	434	227	257	337	387	177	202	3.94594767151909	2.70758045686106	2.28229022327453	2.52671435971429	3.05961807827452	2.82364618424895	1.473836778548	1.46319994853823	2.20878833285617	2.93987546519089	1.15268939369981
ENSMUSG00000026639	254.411068784868	368.602918006747	274.062700875162	275.961128713527	243.415536689704	231.601713847091	197.547376668066	181.292082333492	137.336014512298	252.544821868169	146.662632084112	180.326572614138	274.675844486183	182.618250013379	0.590260323261314	0.000433695067933503	0.0129602015191223	Lamb3	1	192890007	193026186	+	6612	protein_coding	laminin, beta 3 [Source:MGI Symbol;Acc:MGI:99915]	-	239	343	296	309	264	237	202	213	140	219	151	158	2.44551977586788	3.51436822173038	2.59733555908406	2.5997014698125	2.32915230883558	2.22313400319609	1.89091344664981	1.74842458841806	1.32296691241915	2.39860553645184	1.4177926681083
ENSMUSG00000029314	624.850616638985	666.27932700928	671.268439643556	665.3431744064	561.51538577284	660.602356795921	333.483442791141	211.081861120686	561.11571643596	612.334705077615	225.335964526583	389.185830768488	641.643216711164	388.756253453412	0.724524992134075	0.000436274069726824	0.0130056265154972	Gpat3	5	100993579	101046968	+	3502	protein_coding	glycerol-3-phosphate acyltransferase 3 [Source:MGI Symbol;Acc:MGI:3603816]	-	587	620	725	745	609	676	341	248	572	531	232	341	11.3403924081261	11.9939307175495	12.0113289216792	11.8341747001789	10.1444371995296	11.9723855586965	6.02686360390068	3.84357788560502	10.2054857074562	10.9805967073315	4.11282723627265
ENSMUSG00000018501	2297.15098927927	1751.66984358891	1968.43683128579	2287.1729794024	2422.16899577217	2442.07883081806	1451.28864839312	1595.8810064568	1412.59900641221	2063.02596494134	1845.42384741598	1715.38505467753	2194.77974502443	1680.6005880495	0.385619810242952	0.00044399391975279	0.0132037126450454	Ncor1	11	62207252	62349367	-	12811	protein_coding	nuclear receptor co-repressor 1 [Source:MGI Symbol;Acc:MGI:1349717]	MYB	2158	1630	2126	2561	2627	2499	1484	1875	1440	1789	1900	1503	11.3965797057402	8.61966844996602	9.62829579933084	11.1205019981117	11.9620013927534	12.0985511563613	7.16974971560055	7.94361866797749	7.02317116087638	10.1128804030633	9.20744627620355
ENSMUSG00000021591	982.516386980892	1064.97227913903	1049.95642835282	1184.22154263475	973.662146758815	1160.94023649934	543.7442644923	679.206956348013	851.483289976247	1013.63880558046	651.726000850592	911.904629865168	1069.37817006094	775.283991185463	0.465276954696883	0.00045659167089116	0.0135129130165909	Glrx	13	75987987	75998273	+	5494	protein_coding	glutaredoxin [Source:MGI Symbol;Acc:MGI:2135625]	-	923	991	1134	1326	1056	1188	556	798	868	879	671	799	11.3663014255715	12.2199938538531	11.9754983327615	13.4261876934289	11.2124900371466	13.4115176591644	6.26381989924399	7.88341488720852	9.87153891417468	11.5863803687628	7.58232662790237
ENSMUSG00000117485	339.569585532941	234.272408529069	194.436375620892	252.741098465787	262.778136199112	252.123384694301	187.767803565686	178.738672723161	176.574875801526	187.967150522884	184.542384741598	168.913498398054	255.986831507017	180.750730958818	0.500908663208438	0.000457947143265378	0.0135204490711187	Gm19696	17	84441432	84463868	-	3034	lncRNA	predicted gene, 19696 [Source:MGI Symbol;Acc:MGI:5011881]	-	319	218	210	283	285	258	192	210	180	163	190	148	7.11346550229099	4.86773475412163	4.01580774922434	5.18882118248553	5.47969126892185	5.27417176850295	3.9168665751446	3.75667707996423	3.70689872041807	3.89062694115728	3.88782446422029
ENSMUSG00000032232	2913.48575424345	2903.68829286947	2748.03410877527	2657.80038527979	2898.85775512284	2875.96558587337	2174.9770579692	2483.61641431517	1942.32363381678	2488.54669219867	2596.21997060154	2331.6910623461	2832.9719803607	2336.22913854124	0.278056625103721	0.000463960370082842	0.0136651349289148	Cgnl1	9	71533791	71678884	-	7844	protein_coding	cingulin-like 1 [Source:MGI Symbol;Acc:MGI:1915428]	-	2737	2702	2968	2976	3144	2943	2224	2918	1980	2158	2673	2043	23.6071378207425	23.3363939558206	21.9530823624264	21.1053805387744	23.3814671740848	23.2703447456074	17.5489171476015	20.1905360508877	15.7718049330995	19.92330654588	21.1558265395876
ENSMUSG00000025195	1896.90596056333	1464.73987534459	1851.77500591326	1721.85455067858	1631.9905300787	1841.08704172118	936.883103207955	1248.6172994518	1149.69863577438	1639.81158308921	970.304433457141	1598.97169767347	1734.72549404994	1257.38112544232	0.465065052951628	0.000469095850461415	0.0137833378836533	Dnmbp	19	43835260	43928630	-	8264	protein_coding	dynamin binding protein [Source:MGI Symbol;Acc:MGI:1917352]	-	1782	1363	2000	1928	1770	1884	958	1467	1172	1422	999	1401	14.5889324786362	11.1735592275876	14.0413505637148	12.9782030988213	12.494237724622	14.139717417463	7.17510607948834	9.63473895284022	8.86117053969099	12.4611134422405	7.5048808815789
ENSMUSG00000020743	1620.14078113209	1447.54557013145	1583.26763005584	1734.3576438889	1450.35090610949	1611.43977271668	1278.190204481	1051.15362291954	1038.84885263231	1555.62997579982	968.361882038808	1320.492686801	1574.51705067241	1202.11287077875	0.39035328405226	0.000473608101888215	0.0138496540652168	Mif4gd	11	115498744	115503795	-	2010	protein_coding	MIF4G domain containing [Source:MGI Symbol;Acc:MGI:1916924]	-	1522	1347	1710	1942	1573	1649	1307	1235	1059	1349	997	1157	51.2300427272309	45.4001749456268	49.3593291069906	53.7466021380691	45.651964644299	50.8832377900362	40.2469204964973	33.3480963085884	32.9195351854493	48.6030422310126	30.7941148106076
ENSMUSG00000048490	283.152068187343	344.960748338676	306.468763478644	442.966730879965	401.082418409171	471.998429485843	214.172650942111	219.593226488455	227.585395477522	315.96932051086	192.312590414929	329.837844844848	375.104859796607	249.911838113121	0.58913090535778	0.000486381231645938	0.0141557684527853	Nrip1	16	76084288	76170715	-	11457	protein_coding	nuclear receptor interacting protein 1 [Source:MGI Symbol;Acc:MGI:1315213]	-	266	321	331	496	435	483	219	258	232	274	198	289	1.57078536614374	1.89810445011608	1.67620169635928	2.40828903648637	2.21485424211977	2.61472703845898	1.1831132751759	1.22221874389031	1.26523402796817	1.73191754402838	1.07290903104054
ENSMUSG00000028919	2335.4723218159	2067.61520188041	1729.55785552298	2251.44985594434	2273.72239953337	2072.68875556827	1647.85806775094	1507.36280663199	1420.44677867005	2113.7655638555	1652.13998129189	1580.71077892773	2121.75106504421	1653.71399618802	0.359986519538111	0.00050246343176726	0.0145548487475601	Arhgef19	4	140966810	140984875	+	4242	protein_coding	Rho guanine nucleotide exchange factor (GEF) 19 [Source:MGI Symbol;Acc:MGI:1925912]	-	2194	1924	1868	2521	2466	2121	1685	1771	1448	1833	1701	1385	34.9922672134367	30.7270163561693	25.5490880407062	33.0597851386635	33.911672946587	31.011312297748	24.5856880395524	22.6593811090264	21.3280764829217	31.2924352757131	24.8944349499738
ENSMUSG00000024998	443.88876854933	464.246240754853	621.270514483898	534.953773784474	546.762929003767	720.212924494962	343.26301589352	285.130739820281	383.559869102203	513.161852654498	428.332587742341	373.20752686597	555.222525178547	387.775932013136	0.519913323909219	0.000506124627526352	0.0146097388200417	Plce1	19	38469557	38773474	+	15998	protein_coding	phospholipase C, epsilon 1 [Source:MGI Symbol;Acc:MGI:1921305]	-	417	432	671	599	593	737	351	335	391	445	441	327	1.76350414829626	1.82938048718537	2.43347014721465	2.08285470249351	2.16229930117931	2.85727430471812	1.3579836767796	1.13652570181536	1.52709078587588	2.01438222418319	1.71136056684058
ENSMUSG00000036585	4128.05909936284	4062.15460660497	5481.25401750324	5368.29237766023	4680.2169099884	6298.19850525106	1887.45760875924	2032.51404982338	3086.13644039778	4147.96221123198	2447.61478709909	4005.98904984573	5003.02925272845	2934.61235785953	0.769858958624343	0.000510329731091946	0.0146445555076432	Fgf1	18	38971726	39062525	-	5463	protein_coding	fibroblast growth factor 1 [Source:MGI Symbol;Acc:MGI:95515]	-	3878	3780	5920	6011	5076	6445	1930	2388	3146	3597	2520	3510	48.0266978752253	46.8755727709	62.8723511501513	61.2087305762769	54.2022381386087	73.1714837118747	21.8664979700068	23.72483872139	35.9816694510917	47.6822564465219	28.6376887093074
ENSMUSG00000060371	324.666845102028	174.09234028307	249.98962579829	190.225632414179	164.121081555937	302.93895060168	90.9500298521292	34.8965980078553	87.3064663685322	212.183777277366	84.5009866974687	170.054805819662	234.339079292531	113.315444003836	1.05306419173739	0.000513810323504576	0.0147100661848093	Caln1	5	130398296	130876253	+	10483	protein_coding	calneuron 1 [Source:MGI Symbol;Acc:MGI:2155987]	-	305	162	270	213	178	310	93	41	89	184	87	149	1.96843181896081	1.04692462918505	1.49433295267603	1.13029514674838	0.990515380512067	1.83411367209804	0.549098792179377	0.212274788971292	0.530466805452006	1.27110023512371	0.515231362018034
ENSMUSG00000005677	3121.05963881687	3119.69175210958	3492.4476611524	2830.16445596494	3050.9924655539	2531.00607115597	1581.35697065476	2239.34022826018	2353.35070582145	2726.10026893311	2023.16730219342	2702.61597436886	3024.22700745895	2270.98857503863	0.413588999210581	0.000519014774043509	0.0148245103600055	Nr1i3	1	171041539	171048270	+	4414	protein_coding	nuclear receptor subfamily 1, group I, member 3 [Source:MGI Symbol;Acc:MGI:1346307]	THR-like	2932	2903	3772	3169	3309	2590	1617	2631	2399	2364	2083	2368	44.9404855362916	44.5554357167837	49.5802315170832	39.9381326913707	43.7311849637028	36.3929763711678	22.6741396298175	32.3510712491302	33.9587511854685	38.7849026073063	29.2971628325157
ENSMUSG00000033618	707.880170468357	597.502106156709	666.639002128773	910.939648180574	583.644070926449	838.456837471746	291.431278450909	446.846681807903	505.20033909881	634.244986426908	522.546331531473	536.414488155981	717.510305888768	489.447350911997	0.553121618960816	0.000527017975258624	0.0149488100972897	Map3k13	16	21613096	21752189	+	8714	protein_coding	mitogen-activated protein kinase kinase kinase 13 [Source:MGI Symbol;Acc:MGI:2444243]	-	665	556	720	1020	633	858	298	525	515	550	538	470	5.16309614984762	4.32258183481332	4.79384663542279	6.51149125083405	4.23753171350491	6.10688683761023	2.11666356480869	3.26995589299159	3.69269522839392	4.57080502055726	3.83295167507282
ENSMUSG00000022451	934.614721310101	906.999599993278	999.032615690203	964.524333367667	1102.7461434882	1070.05855131884	782.365848190359	647.714904487266	811.263457154788	831.437518570547	814.900319990532	890.219788854607	996.329327528048	796.316972874683	0.324810615640619	0.000534639040071805	0.0151300384565943	Twf1	15	94475832	94487770	-	3054	protein_coding	twinfilin actin binding protein 1 [Source:MGI Symbol;Acc:MGI:1100520]	-	878	844	1079	1080	1196	1095	800	761	827	721	839	780	19.4505374576421	18.7223087091981	20.4984775740282	19.6721835524447	22.8448838321339	22.2379744374814	16.2133993519274	13.5243303650565	16.9196068972894	17.0967591583777	17.0553859599297
ENSMUSG00000109984	6.38688875610547	9.67179668239277	12.9624250413928	4.46539043225772	6.45419983646942	8.79500179166168	0.977957310237949	0	0.980971532230699	2.30634540518876	0	0	8.12261709004664	0.710879041276234	3.57280993510184	0.000538583696031175	1	Gm38948	7	15705808	15718579	+	688	lncRNA	predicted gene, 38948 [Source:MGI Symbol;Acc:MGI:5621833]	-	6	9	14	5	7	9	1	0	1	2	0	0	0.590022991560223	0.886216964449843	1.18061634797933	0.404277350944539	0.593521435992259	0.811342472906197	0.08996315701451	0	0.0908166240128263	0.210517943705793	0
ENSMUSG00000121277	153.285330146531	166.56983175232	172.215075549933	225.055677785789	137.382253661992	201.307818786923	103.663474885223	75.7511517731493	108.887840077608	134.921206203542	135.007323574117	122.119894112106	175.969331280581	113.391815104291	0.638429022206335	0.000541335344532338	0.0152193136907538	ENSMUSG00000121277	1	72275642	72305891	+	2227	lncRNA	novel transcript, antisense to KO:Pecrand Pecr	-	144	155	186	252	149	206	106	89	111	117	139	107	4.37470122884706	4.71517123628854	4.84576024178005	6.29474539715854	3.90294883869642	5.73716240084067	2.94604091367498	2.16905186390921	3.11427208918344	3.80463682005871	3.87492416041823
ENSMUSG00000035093	1538.17570876207	1344.3797388526	1466.6058046833	1592.3582281431	1596.95344525215	1602.64477092502	1073.79712664127	797.51493496001	1157.54640803222	1417.24925148849	1082.00114001127	1362.72106140051	1523.51961610304	1148.47165375563	0.408956725577066	0.000541511161281503	0.0152193136907538	Secisbp2l	2	125578906	125624790	-	8222	protein_coding	SECIS binding protein 2-like [Source:MGI Symbol;Acc:MGI:1917604]	-	1445	1251	1584	1783	1732	1640	1098	937	1180	1229	1114	1194	11.8904009018388	10.3077962471743	11.177557173238	12.063455205864	12.2884532694748	12.3713335364404	8.26566868456935	6.18532131574576	8.96723036226866	10.8248521245634	8.41155602992679
ENSMUSG00000106538	69.1912948578093	40.8364748812139	63.8862377040074	81.2701058670904	51.6335986917554	39.0888968518297	14.6693596535692	4.25568268388479	42.18177588592	25.3697994570763	19.4255141833261	29.6739929618202	57.6511014756177	22.5960208042661	1.36038757074062	0.000551703958833918	0.0154351435589936	Gm30301	5	53139379	53153095	+	652	lncRNA	predicted gene, 30301 [Source:MGI Symbol;Acc:MGI:5589460]	-	65	38	69	91	56	40	15	5	43	22	20	26	6.74484360495224	3.948407688919	6.14003278607302	7.76410932145266	5.01034046579968	3.80506899358871	1.42395671838918	0.416219626811696	4.12073466993168	2.44355797233963	1.90436865102428
ENSMUSG00000079845	0	2.14928815164284	19.4436375620892	62.515466051608	12.9083996729388	4.88611210647871	0.977957310237949	0	1.9619430644614	4.61269081037751	0	0	16.9838172574596	1.25876519751281	3.79892846654939	0.000552642813779671	1	Xlr4a	X	72117951	72126084	-	1535	protein_coding	X-linked lymphocyte-regulated 4A [Source:MGI Symbol;Acc:MGI:3574098]	-	0	2	21	70	14	5	1	0	2	4	0	0	0	0.0882688775304368	0.793743368804341	2.5368074555686	0.532042668355276	0.202028093144938	0.0403222488768618	0	0.0814095600271329	0.188711850514118	0
ENSMUSG00000095730	13.8382589715619	3.22393222746426	4.62943751478315	12.5030932103216	1.84405709613412	6.84055694907019	0	0	1.9619430644614	0	0	0	7.1465559948892	0.326990510743566	4.30722388021454	0.000559700701361087	1	Vmn2r29	7	7234326	7250327	-	4812	protein_coding	vomeronasal 2, receptor 29 [Source:MGI Symbol;Acc:MGI:1923479]	-	13	3	5	14	2	7	0	0	2	0	0	0	0.182777973002031	0.0422358874717021	0.0602855990536884	0.161845363437149	0.0242455021946725	0.0902241006168894	0	0	0.0259691759438173	0	0
ENSMUSG00000004865	519.466952163245	484.66447819546	524.978214176409	560.853038291569	555.983214484437	607.832346045951	422.477558022794	386.415987696739	500.295481437656	441.665145093647	371.027320901529	418.859823730309	542.296373892845	423.456886147112	0.358008877870728	0.000567419610964532	0.01583874468606	Srpk1	17	28806622	28841683	-	12376	protein_coding	serine/arginine-rich protein specific kinase 1 [Source:MGI Symbol;Acc:MGI:106908]	-	488	451	567	628	603	622	432	454	510	383	382	367	2.66775316847656	2.46877908375721	2.65810390433871	2.82278101742891	2.84226010044201	3.11716810749826	2.16051144757794	1.99102035057008	2.57480098849552	2.24112476722088	1.91624787370196
ENSMUSG00000067786	138.382589715619	26.8661018955355	26.8507375857422	31.257733025804	51.6335986917554	11.7266690555489	8.80161579214154	0	21.5813737090754	3.45951810778314	22.3393413108251	4.56522968643388	47.7862383283341	10.1245131010432	2.23444739546648	0.00056952955131289	1	Nnat	2	157401998	157404442	+	1829	protein_coding	neuronatin [Source:MGI Symbol;Acc:MGI:104716]	-	130	25	29	35	56	12	9	0	22	3	23	4	4.80878953573413	0.926002781637646	0.919927258255233	1.06451597711804	1.78608090962351	0.406928100134473	0.304566357700299	0	0.7515584587524	0.118783224660677	0.780697438238383
ENSMUSG00000060961	2518.56313282426	2103.07845638252	2258.23961971122	2154.10434452112	2586.2900773281	2090.27875915159	2022.41571757208	1490.34007589645	1540.1253056022	1768.96692577978	1960.03438109761	2036.09244014951	2285.0923983198	1802.99580768294	0.342223873949522	0.000577573402362895	0.0160856157093449	Slc4a4	5	89034345	89387512	+	11333	protein_coding	solute carrier family 4 (anion exchanger), member 4 [Source:MGI Symbol;Acc:MGI:1927555]	-	2366	1957	2439	2412	2805	2139	2068	1751	1570	1534	2018	1784	14.124594044614	11.6985470200761	12.4863673194113	11.8394154361426	14.4382575290278	11.7062025950557	11.2942857486749	8.38574021686801	8.65582675317167	9.8023009637141	11.054647451796
ENSMUSG00000067199	332.118215317485	174.09234028307	161.104425514453	245.596473774174	204.690337670887	218.897822370246	161.362956189262	89.3693363615807	108.887840077608	201.805222954016	111.696706554125	126.68512379854	222.749935821719	133.301197655855	0.743475130667464	0.000585878989632136	0.0162066796186079	Frat1	19	41818409	41821022	+	2614	protein_coding	frequently rearranged in advanced T cell lymphomas [Source:MGI Symbol;Acc:MGI:109450]	-	312	162	174	275	222	224	165	105	111	175	115	111	8.07523433284565	4.198512198832	3.86200525328727	5.85227810242592	4.95420756627575	5.31486913136614	3.90689272543503	2.1801373872631	2.65320732311076	4.84819441893218	2.73124639353099
ENSMUSG00000017686	800.490057431886	833.923802837421	916.628627927063	885.933461759931	870.394949375305	994.812424879065	775.520147018693	729.424012017854	715.128246996179	726.498802634458	687.663202089745	735.001979515855	883.697220701778	728.206065045464	0.279673832417996	0.000605735687050703	0.0165424197207076	Rhot1	11	80099845	80158733	+	7414	protein_coding	ras homolog family member T1 [Source:MGI Symbol;Acc:MGI:1926078]	-	752	776	990	992	944	1018	793	857	729	630	708	644	6.86232657318276	7.09079823031798	7.74732558996183	7.44315281656984	7.42756087087681	8.51618988915766	6.62023995907802	6.27376702335609	6.14368214282183	6.15368879955751	5.92856109530093
ENSMUSG00000028633	77.7071465326166	98.8672549755706	119.439487881405	120.565541670958	74.6843123934319	97.7222421295742	53.7876520630872	27.2363691768627	74.5538364495331	77.2625710738234	32.0520984024881	44.5109894427303	98.1643309305928	51.5672527680875	0.934989644171421	0.000607406082018432	0.0165424197207076	Ctps	4	120397065	120427473	-	3316	protein_coding	cytidine 5'-triphosphate synthase [Source:MGI Symbol;Acc:MGI:1858304]	-	73	92	129	135	81	100	55	32	76	67	33	39	1.48941067189991	1.87957341448255	2.25706664905784	2.2647334352068	1.42494238260282	1.87040484304873	1.02660007883868	0.523763950168831	1.43203245970527	1.46321398266921	0.617828647398045
ENSMUSG00000063952	1071.93282956637	1024.13580425781	1168.47002873127	1094.91373398959	1003.16706029696	1254.75358894373	896.786853488199	776.236521540586	731.804763044101	1070.14426800758	716.801473364735	924.459011502861	1102.89550763096	852.705481824677	0.372414202199424	0.000622970354344436	0.0169277033010141	Brpf3	17	29020064	29058923	+	8654	protein_coding	bromodomain and PHD finger containing, 3 [Source:MGI Symbol;Acc:MGI:2146836]	-	1007	953	1262	1226	1088	1284	917	912	746	928	738	810	7.8726093698634	7.46039801477855	8.46080448208208	7.88082029566691	7.33396463705288	9.20233995616094	6.55851582017868	5.71976379415941	5.38611632093079	7.7656649185449	5.29429448824392
ENSMUSG00000022094	6382.63083026807	6869.12493265051	7760.78904978246	7222.32248513363	7706.31460474449	8857.5440266246	6003.67992755077	4970.63737477744	6063.38504071795	5567.51780812566	4262.92908753092	7342.03064320729	7466.45432153396	5701.696646985	0.389206579947239	0.000629069313567363	0.0170556938393694	Slc39a14	14	70540918	70588874	-	10550	protein_coding	solute carrier family 39 (zinc transporter), member 14 [Source:MGI Symbol;Acc:MGI:2384851]	-	5996	6392	8382	8087	8358	9064	6139	5840	6181	4828	4389	6433	38.4516771862216	41.0459483906605	46.0961221759563	42.6415348761493	46.2143356462022	53.2865468562631	36.0162340082947	30.0441923908693	36.6066574862575	33.1407523678463	25.827462815608
ENSMUSG00000029273	4231.31380091988	3451.7567715384	4500.73915187217	6250.65352707435	4838.80582025593	5149.96216022856	2970.05635119265	3235.16997628922	4002.36385150125	3408.77850886898	3071.17379238386	4375.77265444687	4737.20520531488	3510.55252244714	0.432608596070157	0.00065370720629879	0.0176070875170214	Sult1d1	5	87702504	87716886	-	2459	protein_coding	sulfotransferase family 1D, member 1 [Source:MGI Symbol;Acc:MGI:1926341]	-	3975	3212	4861	6999	5248	5270	3037	3801	4080	2956	3162	3834	109.366604128975	88.4917932398568	114.692834905563	158.334410681696	124.497922576431	132.92364034903	76.4432932911387	83.8956586079982	103.670555619749	87.054948478425	79.8310718950645
ENSMUSG00000048234	1409.37345218061	1344.3797388526	1424.0149795473	1480.72346733666	1374.74456516799	1407.20028666587	1155.94554070126	1030.7263460369	1274.28202036768	1190.0742290774	1223.80739354955	1224.62286338589	1406.7394149585	1183.24306551978	0.250383764196711	0.000682489968746094	0.0182152983159156	Rnf149	1	39590377	39616486	-	2838	protein_coding	ring finger protein 149 [Source:MGI Symbol;Acc:MGI:2677438]	-	1324	1251	1538	1658	1491	1440	1182	1211	1299	1032	1260	1073	31.5632501343731	29.8628261960068	31.4422154665316	32.4989986844143	30.647288694873	31.4702534945434	25.7785337190669	23.1596450444654	28.5989805073119	26.3338809581064	27.5630185727531
ENSMUSG00000038024	539.692099890912	420.185833646175	519.422889158669	678.739345703173	614.071013012662	649.852910161668	419.54368609208	366.839847350869	361.978495393128	526.999925085631	437.074069124838	389.185830768488	570.327348595543	416.936975635839	0.453824051665722	0.000683703999644774	0.0182152983159156	Dennd4c	4	86666792	86768840	+	8482	protein_coding	DENN/MADD domain containing 4C [Source:MGI Symbol;Acc:MGI:1914769]	-	507	391	561	760	666	665	429	431	369	457	450	341	4.04404346113477	3.12294601866336	3.83737099232732	4.98440323654516	4.58039327219222	4.86265566564546	3.13048876669968	2.75790402663542	2.71820301478239	3.90180439685219	3.29369112361779
ENSMUSG00000026858	2620.75335292195	2708.10307106998	2660.0747959944	2476.50553373013	2592.74427716457	2171.38822011914	1628.29892154618	1336.28436273983	2084.56450599023	2501.23159192721	1816.28557614099	2080.60342959224	2538.26154183336	1907.87806465611	0.4124739940393	0.00068918817976047	0.0182935382179137	Miga2	2	30254245	30275533	+	6249	protein_coding	mitoguardin 2 [Source:MGI Symbol;Acc:MGI:1922035]	-	2462	2520	2873	2773	2812	2222	1665	1570	2125	2169	1870	1823	26.6553044325021	27.3197049178457	26.6743777085281	24.685230686139	26.2501384740653	22.0538121061277	16.491373919549	13.6360716527292	21.2472242449595	25.1360243950817	18.5780319577119
ENSMUSG00000022474	248.024180028763	206.331662557712	201.843475644545	156.28866512902	147.52456769073	137.7883614027	128.112407641171	122.563661295882	136.355042980067	114.164097556843	107.81160371746	117.554664425672	182.966818742245	121.093579602849	0.592922518010021	0.000689875846700295	0.0182935382179137	Pmm1	15	81835309	81845131	-	2866	protein_coding	phosphomannomutase 1 [Source:MGI Symbol;Acc:MGI:1353418]	-	233	192	218	175	160	141	131	144	139	99	111	103	5.50029341934577	4.53848631991806	4.41315826775324	3.39671968274407	3.25664637992363	3.05135731610779	2.82909958667263	2.72700825695021	3.03034730900021	2.50153492353261	2.40444815094084
ENSMUSG00000027508	230.992476679148	177.316272510534	209.250575668198	291.143456183203	189.937880901814	332.255623240552	172.120486601879	137.884118957867	149.107672899066	175.282250794346	152.49028633911	171.196113241271	238.482714197242	159.68015480559	0.581008435533406	0.000697193773226109	0.0184149116618561	Pag1	3	9752539	9898739	-	9580	protein_coding	phosphoprotein associated with glycosphingolipid microdomains 1 [Source:MGI Symbol;Acc:MGI:2443160]	-	217	165	226	326	206	340	176	162	152	152	157	150	1.53249952240736	1.16682150086228	1.36871215862369	1.89299704569204	1.25437825947377	2.20122049712616	1.13710425433956	0.917803379172412	0.991361093190535	1.14901484765015	1.01742584860882
ENSMUSG00000020029	4301.56957723704	3697.8502649015	3828.54482472566	4063.50529335452	3898.33670122753	3959.70525109035	3464.90275017305	3401.9927374975	3536.40237369167	3153.92734159562	3199.38218599382	3622.50975618528	3958.25198542277	3396.51952418949	0.220776751444232	0.000707529710593985	0.0186078798833304	Nudt4	10	95382869	95400008	-	3210	protein_coding	nudix (nucleoside diphosphate linked moiety X)-type motif 4 [Source:MGI Symbol;Acc:MGI:1918457]	-	4041	3441	4135	4550	4228	4052	3543	3997	3605	2735	3294	3174	85.170645966753	72.6215691026055	74.7376910556169	78.8504560371828	76.8345855979611	78.2914874956229	68.3154991053138	67.5817234351937	70.1704123182468	61.7020878991146	63.7070046632559
ENSMUSG00000039234	1315.69908375773	1126.22699146085	1470.30935469513	1650.40830376245	1327.72110921657	1521.53530995747	860.602433009395	628.138764141396	1404.75123415436	977.890451800033	952.821470692147	1124.18781028434	1401.98335880836	991.398694013612	0.50066275513135	0.000715838192051312	0.018683003205715	Sec24d	3	123061104	123159290	+	6325	protein_coding	Sec24 related gene family, member D (S. cerevisiae) [Source:MGI Symbol;Acc:MGI:1916858]	-	1236	1048	1588	1848	1440	1557	880	738	1432	848	981	985	13.2209926557861	11.2250101111196	14.5666324933566	16.2532150718517	13.2809386124506	15.2678618964723	8.61142984709327	6.33280300871919	14.1460855404618	9.70918741411923	9.62890941991257
ENSMUSG00000033308	12158.5072287061	11062.3861165057	12251.3434391221	13875.7542291976	13279.9771778099	12906.1765180529	9934.09035739708	9560.81671761558	11006.5005916284	10722.1997887225	10691.8030065027	11652.7487746225	12589.0241182324	10594.6932060815	0.248975578287091	0.000716502828509109	0.018683003205715	Dpyd	3	118355778	119226573	+	8884	protein_coding	dihydropyrimidine dehydrogenase [Source:MGI Symbol;Acc:MGI:2139667]	-	11422	10294	13232	15537	14403	13207	10158	11233	11220	9298	11008	10210	86.9840709028477	78.4985441148646	86.4144037059091	97.2873695344036	94.5738824034604	92.2031520748216	70.7705847906275	68.625789831612	78.9111002633556	75.7929051281295	76.9251753265976
ENSMUSG00000079012	12576.848442231	12730.2337221805	13392.0368427647	12501.3070541487	13169.3337520418	15360.9592403478	9858.78764450876	9769.34516912593	11688.2758065288	10397.0050865909	9661.27947907726	13276.8292355713	13288.4531756191	10775.2537369005	0.302542741436427	0.000740996789175492	0.0189998383395687	Serpina3m	12	104304745	104360516	+	1719	protein_coding	serine (or cysteine) peptidase inhibitor, clade A, member 3M [Source:MGI Symbol;Acc:MGI:98378]	-	11815	11846	14464	13998	14283	15719	10081	11478	11915	9016	9947	11633	465.011798715863	466.854812144045	488.181965500498	452.989314562292	484.697038905583	567.151620719372	362.97846833853	362.401920594195	433.083822965459	379.826785616807	359.240146642626
ENSMUSG00000105703	2610.10853832844	2822.01534310705	4603.51266470036	12259.2828927203	1756.46438406775	2552.50496442448	192.657590116876	265.554599474411	2254.27258106615	261.770203488924	457.470859017331	1604.67823478151	4433.98146455807	839.400677990866	2.40122918184547	0.00074476888616871	0.0190176632165839	Gm43305	14	54529900	54534913	-	5014	lncRNA	predicted gene 43305 [Source:MGI Symbol;Acc:MGI:5663442]	-	2452	2626	4972	13727	1905	2612	197	312	2298	227	471	1406	33.0858471682721	35.4810431916846	57.532862894202	152.296228764818	22.1634547515213	32.31015066682	2.4318401374389	3.37730599778789	28.6364703157668	3.27860494377701	5.83183464080921
ENSMUSG00000075327	189.477699764462	167.644475828141	171.289188046976	200.049491365146	160.432967363668	193.490039416557	161.362956189262	121.712524759105	98.0971532230699	93.4069889101447	92.2711923707992	149.51127223071	180.397310297492	119.393681280515	0.595608757487445	0.000744817304987438	0.0190176632165839	Zbtb2	10	4317075	4338108	-	7374	protein_coding	zinc finger and BTB domain containing 2 [Source:MGI Symbol;Acc:MGI:2685949]	ZBTB	178	156	185	224	174	198	165	143	100	81	95	131	1.6331384060761	1.43320215713577	1.45558573337604	1.68982888822253	1.37648956072504	1.66537559939086	1.38494949610621	1.05252652903215	0.847326245196969	0.795480334068105	0.799814173070543
ENSMUSG00000034109	1715.94411247367	1680.7433345847	1891.58816854039	1997.8156793921	1998.95789220939	1922.19650268872	1279.16816179124	1047.74907677244	1480.28604213612	1672.10041876185	1491.87948927945	1701.68936561823	1867.87428164816	1445.47875905989	0.370916889527945	0.000751750970409171	0.0191159532475475	Golim4	3	75782391	75864256	-	11072	protein_coding	golgi integral membrane protein 4 [Source:MGI Symbol;Acc:MGI:1920374]	-	1612	1564	2043	2237	2168	1967	1308	1231	1509	1450	1536	1491	9.85020079070048	9.56966334187232	10.7056116384843	11.2392608857532	11.4224695187742	11.0186508832497	7.31197659410997	6.03437259961323	8.51563335595414	9.48395505061862	8.61258978359187
ENSMUSG00000071369	1208.18645636329	1276.67716207585	1133.28630361891	1805.80389080502	1087.07165817106	1730.66090811476	816.594354048687	766.87401963604	1471.45729834605	758.787638307101	772.164188787214	997.502686485803	1373.61439652481	930.563364268482	0.561933576640392	0.000760171010424302	0.0192503512371779	Map3k5	10	19810218	20018499	+	6086	protein_coding	mitogen-activated protein kinase kinase kinase 5 [Source:MGI Symbol;Acc:MGI:1346876]	-	1135	1188	1224	2022	1179	1771	835	901	1500	658	795	874	12.6174047992537	13.2242326394145	11.6685976483447	18.4819183990661	11.3007863444907	18.0483187904409	8.49195439396906	8.03513152184634	15.399729868754	7.82963483300913	8.10968161823795
ENSMUSG00000025089	3308.40837566264	3146.55785400512	3458.18982354301	4000.98982730291	3684.42607807597	5502.73945431632	2789.13424879863	2073.36860358867	3401.02830224383	2826.42629405882	2606.90400340237	3223.05215862232	3850.21856881766	2819.98560178577	0.449507747702742	0.000782765151676752	0.0196603713556112	Gfra1	19	58224036	58444341	-	5476	protein_coding	glial cell line derived neurotrophic factor family receptor alpha 1 [Source:MGI Symbol;Acc:MGI:1100842]	-	3108	2928	3735	4480	3996	5631	2852	2436	3467	2451	2684	2824	38.3993341534329	36.2237677760224	39.572761884007	45.5105851780605	42.5685490154139	63.7781955984729	32.2358560222979	24.1442651247431	39.5588988296747	32.4136123316064	30.4290010910852
ENSMUSG00000041471	1159.22030923314	989.747193831527	1328.64856674276	1653.98061610826	892.523634528914	1754.11424622586	330.549570860427	545.578520074031	618.01206530534	834.89703667833	188.427487578264	887.93717401139	1296.37242777841	567.566975751297	1.19208530467787	0.000792329851655364	0.019819542236316	Shld2	14	33958990	34032450	-	5727	protein_coding	shieldin complex subunit 2 [Source:MGI Symbol;Acc:MGI:1922948]	-	1089	921	1435	1852	968	1795	338	641	630	724	194	778	12.8649119961774	10.8947792540154	14.5376401011877	17.9891914760646	9.85995609837783	19.4396038325328	3.65294087389248	6.07478613838539	6.87332940669102	9.15501256986029	2.10301887489749
ENSMUSG00000054659	100.061257178986	78.4490175349636	52.7755876685279	100.917823769024	89.4367691625048	102.608354236053	40.0962497197559	65.5375133318258	38.2578897569973	57.6586351297189	41.7648554941512	55.924063658815	87.3748015916765	49.8732011818774	0.808915802254079	0.000798115073057115	0.0199236774944868	Pm20d2	4	33174230	33189737	-	1834	protein_coding	peptidase M20 domain containing 2 [Source:MGI Symbol;Acc:MGI:2685270]	-	94	73	57	113	97	105	41	77	39	50	43	49	3.46764512088174	2.69655645356409	1.8032034079435	3.42749600565237	3.08531286433864	3.55091362187954	1.38368633209667	2.27872302556754	1.3286759299412	1.9743231361721	1.45558559160623
ENSMUSG00000025059	3567.07737028491	3665.61094262686	4214.63991345858	3165.06873838427	3495.41022572222	3850.25633990522	2308.9572094718	2538.94028920567	3350.01778256784	3386.86822751969	2133.89273303838	3062.12781217553	3659.67725506368	2796.80067566315	0.388219010916781	0.000807113850582884	0.0200262066926444	Gk	X	84745543	84820425	-	7743	protein_coding	glycerol kinase [Source:MGI Symbol;Acc:MGI:106594]	-	3351	3411	4552	3544	3791	3940	2361	2983	3415	2937	2197	2683	29.2800147825174	29.8440973671995	34.1084661151021	25.4614011376015	28.5608634070681	31.5600078659762	18.8729527874655	20.9095237427378	27.5572096668753	27.4689620338869	17.6152747510514
ENSMUSG00000022425	1756.39440792901	1652.80258861334	2088.80220667016	1352.12022288764	1832.99275355732	1507.85419605933	982.847096789139	1019.6615710588	1420.44677867005	1424.16828770406	1108.22558415876	1576.1455492413	1698.4943959528	1255.24914460368	0.436974607632249	0.000824976449784275	0.0203796779903372	Enpp2	15	54702297	54816288	-	5779	protein_coding	ectonucleotide pyrophosphatase/phosphodiesterase 2 [Source:MGI Symbol;Acc:MGI:1321390]	-	1650	1538	2256	1514	1988	1543	1005	1198	1448	1235	1141	1381	19.3168973876439	18.0297468541427	22.6493423350117	14.5737402879066	20.0673715904827	16.5601158939004	10.7638216449408	11.2513405649458	15.6555979305336	15.4761106080583	12.2574907362328
ENSMUSG00000026670	628.044061017038	653.383598099423	716.636927288431	726.965562371556	615.915070108796	888.295180957829	566.237282627772	485.147825962866	577.792232483882	546.603861029735	481.752751746488	611.74077798214	704.873399973846	544.879121972147	0.372545375148031	0.00082662789139571	0.0203796779903372	Uap1	1	169969507	170002526	-	4011	protein_coding	UDP-N-acetylglucosamine pyrophosphorylase 1 [Source:MGI Symbol;Acc:MGI:1334459]	-	590	608	774	814	668	909	579	570	589	474	496	536	9.95188783903123	10.2692069336333	11.1958608949526	11.2893669112028	9.71517454283102	14.0559874737736	8.93468050936029	7.71298240380447	9.17521869408268	8.55801890523354	7.67710778848221
ENSMUSG00000048087	7672.78235900137	8120.01063690664	7847.82247506039	9506.81623027668	7821.56817325287	9410.65191707799	5139.16566530042	5696.65684064818	6675.51127682991	7126.60730203326	6746.48107586917	8176.32636840308	8396.60863192932	6593.45808818067	0.348961707380144	0.000829450600361654	0.0203796779903372	Ahcyl	16	45973348	45975440	-	2093	protein_coding	adenosylhomocysteinase like [Source:MGI Symbol;Acc:MGI:3643647]	-	7208	7556	8476	10645	8483	9630	5255	6693	6805	6180	6946	7164	232.997720778648	244.573111629639	234.958366863875	282.926927066753	236.432429934296	285.369266533505	155.402004967291	173.560840075245	203.148066396661	213.829100278556	206.031760912793
ENSMUSG00000036327	227.799032301095	185.913425117106	184.251613088369	167.89868025289	218.520765891893	240.396715638752	172.120486601879	114.903432464889	130.469213786683	166.05686917359	100.04139804413	144.946042544276	204.130038715018	138.089573769241	0.566091063332632	0.000831505268520997	0.020380079868274	Qsox2	2	26098649	26127537	-	4644	protein_coding	quiescin Q6 sulfhydryl oxidase 2 [Source:MGI Symbol;Acc:MGI:2387194]	-	214	173	199	188	237	246	176	135	133	144	103	127	3.11765235046636	2.52371250781601	2.48616564283477	2.25197457711328	2.97702815513578	3.28543618658312	2.34570601993389	1.57776277140247	1.78942385091939	2.24552473286179	1.37693562799512
ENSMUSG00000090298	4.25792583740365	24.7168137438926	33.3319501064386	54.4777632735441	51.6335986917554	58.6333452777445	8.80161579214154	9.36250190454655	5.88582919338419	4.61269081037751	14.5691356374946	23.9674558537779	37.8418994884632	11.1998715319537	1.76424014425202	0.000834586218774556	1	Sult3a2	10	33642420	33662700	-	930	protein_coding	sulfotransferase family 3A, member 2 [Source:MGI Symbol;Acc:MGI:3645972]	-	4	23	36	61	56	60	9	11	6	4	15	21	0.290993418059809	1.67544769957638	2.24589137532657	3.6487552396646	3.51262578892623	4.00145965132232	0.598980503477254	0.641962830858813	0.403108627876287	0.311476011332442	1.00132932295793
ENSMUSG00000021385	205.444921654726	181.61484881382	181.473950579499	151.823274696762	148.446596238797	150.492252879544	120.288749159268	134.479572810759	118.697555399915	121.08313377241	101.983949462462	117.554664425672	169.882640810525	119.014604171748	0.510891406910687	0.000835601823432764	0.0204033033705789	Ippk	13	49574725	49618049	+	4831	protein_coding	inositol 1,3,4,5,6-pentakisphosphate 2-kinase [Source:MGI Symbol;Acc:MGI:1922928]	-	193	169	196	170	161	154	123	158	121	105	105	103	2.70287769652013	2.3699307456591	2.35390119307325	1.95753587110218	1.94408677357514	1.97712361575375	1.57587294539348	1.77508926001381	1.56495597512311	1.5739822245194	1.34933841698532
ENSMUSG00000048109	414.083287687505	422.335121797818	434.241238886659	497.44449415351	442.573703072189	462.226205272886	375.535607131372	393.225079990955	332.549349426207	363.249401317229	323.43481115238	324.131307736806	445.484008478428	352.020926125825	0.339431972231675	0.000839838759577519	0.0204615122024582	Rbm15	3	107232737	107240989	-	7423	protein_coding	RNA binding motif protein 15 [Source:MGI Symbol;Acc:MGI:2443205]	-	389	393	469	557	480	473	384	462	339	315	333	284	3.54548999230422	3.58673324226213	3.66574775538562	4.17420313403105	3.7721467835893	3.95213544842646	3.20187880614003	3.37802346400987	2.85347472070046	3.07311388656334	2.78505256658889
ENSMUSG00000019873	2415.30843126722	2283.61866112052	2909.13853428973	2738.17741306043	2826.93952837361	2722.54166572994	2074.24745501469	2086.13565164033	2377.87499412721	2274.05656951611	1941.58014262345	2346.52805882701	2649.28737230691	2183.40381195813	0.279602317203675	0.000847686173515489	0.0204946487856638	Reep3	10	66844968	66932724	-	8294	protein_coding	receptor accessory protein 3 [Source:MGI Symbol;Acc:MGI:88930]	-	2269	2125	3142	3066	3066	2786	2121	2451	2424	1972	1999	2056	18.5087286287457	17.3572489085238	21.9791728699018	20.5639227948208	21.5642782261456	20.8337391033339	15.8281356338449	16.0390790225629	18.2609083271857	17.2183067803004	14.9629555858162
ENSMUSG00000075590	1795.78022192499	1635.6082834002	2029.54540648093	1892.43246519082	1696.53252844339	2326.76658510516	1295.79343606528	1438.42074715306	1493.03867205512	1529.10700364015	1200.49677652956	1843.21148589768	1896.11091509092	1466.67802022347	0.371082449929092	0.000889891387499226	0.0212871889969234	Nrbp2	15	75957367	75963476	-	3894	protein_coding	nuclear receptor binding protein 2 [Source:MGI Symbol;Acc:MGI:2385017]	-	1687	1522	2192	2119	1840	2381	1325	1690	1522	1326	1236	1615	29.3106371037631	26.4791898443803	32.659820821818	30.2714242514749	27.5644088433238	37.9239520189717	21.0607123611781	23.5554228244104	24.4215090914984	24.6601173378878	19.7056673541119
ENSMUSG00000038970	399.180547256592	350.333968717783	409.24227630683	497.44449415351	512.647872725285	462.226205272886	335.439357411616	333.645522416568	305.082146523747	326.347874834209	288.468885622393	392.609753033314	438.512560738814	330.265589973641	0.411015219806082	0.000890865913077564	0.0212871889969234	Lmtk2	5	144037254	144125022	+	8114	protein_coding	lemur tyrosine kinase 2 [Source:MGI Symbol;Acc:MGI:3036247]	-	375	326	442	557	556	473	343	392	311	283	297	344	3.1268164452908	2.72187755761683	3.16050485012783	3.81872194526898	3.99729863493868	3.61556586562356	2.61644881007051	2.62211183384374	2.39485474572053	2.5258002040481	2.27242767475317
ENSMUSG00000054814	229.927995219797	250.392069666391	273.136813372206	233.986458650304	224.052937180296	284.371724597061	208.304907080683	115.754569001666	160.879331285835	196.039359441044	188.427487578264	182.609187457355	249.311333114342	175.335806974141	0.510617049871481	0.000898071355792063	0.0213761868058878	Usp46	5	74159114	74229092	-	7841	protein_coding	ubiquitin specific peptidase 46 [Source:MGI Symbol;Acc:MGI:1916977]	-	216	233	295	262	243	291	213	136	164	170	194	160	1.86375327827619	2.01312367001329	2.18282921261759	1.85877868057286	1.80784680807714	2.30182167546095	1.68136218359066	0.941385709696382	1.30685133536733	1.57009174185879	1.53602717721438
ENSMUSG00000037692	700.4288002529	551.292410896388	658.306014602163	644.802378418014	592.86435640712	720.212924494962	575.038898419914	365.988710814092	603.29749232188	375.934301045767	337.032671080708	502.175265507727	644.651147511924	459.911223198348	0.487403797453972	0.000905493634661794	0.0214730124596599	Ahdc1	4	132738571	132805421	+	8444	protein_coding	AT hook, DNA binding motif, containing 1 [Source:MGI Symbol;Acc:MGI:2444218]	-	658	513	711	722	643	737	588	430	615	326	347	440	5.27210185479392	4.11580820438951	4.88529249601027	4.75649252010389	4.44211252182445	5.41339108560878	4.31004919366153	2.7638876023905	4.55072595361287	2.79586976302018	2.55123153175235
ENSMUSG00000027007	1413.63137801801	1192.85492416178	1475.86467971287	1538.77354295601	1512.12681882998	1850.85926593413	1072.81916933103	1222.23206681171	1250.73870359414	1220.05671934485	1239.34780489621	1175.54664425672	1497.3517682688	1196.79018470578	0.323524059313825	0.000908925956023537	0.0214939133812139	Itprid2	2	79465696	79503310	+	5599	protein_coding	ITPR interacting domain containing 2 [Source:MGI Symbol;Acc:MGI:1917849]	-	1328	1110	1594	1723	1640	1894	1097	1436	1275	1058	1276	1030	16.0469954920783	13.4306953902692	16.5176038013316	17.1187738691223	17.0867784211157	20.9806842264457	12.1268857425439	13.9201565434628	14.2283162321935	13.6843055273461	14.1484489012051
ENSMUSG00000097426	1336.98871294475	1301.39397581974	1394.38657945268	1550.38355807988	1619.08213040576	1238.1408077817	415.631856851128	375.351212718639	329.606434829515	1146.25366637881	557.51225706146	1125.32911770595	1406.72929408075	658.280757590918	1.09629350226832	0.000910017501891485	0.0214939133812139	Gm8941	1	151012258	151013531	+	899	processed_pseudogene	predicted gene 8941 [Source:MGI Symbol;Acc:MGI:3779824]	-	1256	1211	1506	1736	1756	1267	425	441	336	994	574	986	94.522689590462	91.2578934416941	97.1928853805118	107.420674325456	113.944043448666	87.4111961762996	29.2605418365325	26.624351887969	23.3524998217987	80.0708160166673	39.6388297501965
ENSMUSG00000030499	169.252552036795	225.675255922498	158.326763005584	201.835647538049	222.208880084161	164.173366777685	116.376919918316	121.712524759105	122.621441528837	162.597351065807	117.524360809123	149.51127223071	190.245410894129	131.723978385316	0.533687336697874	0.000915703246055558	0.0215866934127723	Kctd15	7	34338439	34356157	-	4238	protein_coding	potassium channel tetramerisation domain containing 15 [Source:MGI Symbol;Acc:MGI:2385276]	-	159	210	171	226	241	168	119	143	125	141	121	131	2.53829617322463	3.35694580839267	2.34101584485727	2.96650668917718	3.31728585785089	2.45865996508809	1.73795743064935	1.83136635797146	1.8429045929927	2.40938233636285	1.7725277444149
ENSMUSG00000045210	674.881245228478	649.085021796137	758.301864921479	769.83331052123	662.016497512149	827.707390837493	621.980849311335	487.701235573197	563.077659500421	596.190287241294	614.817523902272	578.642862755494	723.637555136161	577.068403047336	0.327727211564102	0.000926877624480932	0.0218082585897985	Vcpip1	1	9788847	9818607	-	9749	protein_coding	valosin containing protein (p97)/p47 complex interacting protein 1 [Source:MGI Symbol;Acc:MGI:1917925]	-	634	604	819	862	718	847	636	573	574	517	633	507	4.39982406288913	4.1972308500138	4.87408419052948	4.91864003778366	4.2962661816919	5.38856939505437	4.03784990137708	3.1900294942731	3.67879522229493	3.84041391447203	4.0309950362916
ENSMUSG00000034528	10277.5684900331	8616.49619993614	8936.66617853738	8337.77701511161	8676.28863731104	7724.94324034284	5417.88349871824	6555.45360625614	6658.83476078198	7620.16521874365	6159.83054753272	8820.02375419026	8761.62329354534	6872.03189770383	0.350587518389522	0.000933756431102418	0.0218862528374044	Hsd17b13	5	104103306	104125276	-	2157	protein_coding	hydroxysteroid (17-beta) dehydrogenase 13 [Source:MGI Symbol;Acc:MGI:2140804]	-	9655	8018	9652	9336	9410	7905	5540	7702	6788	6608	6342	7728	302.836526399134	251.826769856265	259.618934551929	240.77342083558	254.487400379413	227.301273726192	158.969110905862	193.799885474158	196.628053654964	221.85409586032	182.534397359457
ENSMUSG00000110945	47.901665670791	31.1646781988212	18.5177500591326	19.647717901934	34.1150562784812	31.2711174814637	11.7354877228554	11.0647749781005	10.7906868545377	17.2975905389157	9.71275709166307	14.8369964809101	30.4363309317706	12.5730489444971	1.2802948367559	0.000934334219543804	1	Gm9856	9	122848060	122850637	-	2578	lncRNA	predicted gene 9856 [Source:MGI Symbol;Acc:MGI:3704347]	-	45	29	20	22	37	32	12	13	11	15	10	13	1.18096145711821	0.762080892798175	0.450107529319392	0.474720091846124	0.837231612247531	0.769869661387071	0.288105439996817	0.273691043976411	0.266602098731214	0.421362525027886	0.240816206452255
ENSMUSG00000020429	3026.32078893464	672.727191464208	2470.26785788829	1133.31609170701	2089.31668991996	2537.84662810504	621.980849311335	1078.38999209641	1044.73468182569	516.621370762282	315.66460547905	1071.68766889035	1988.29920800319	774.846528060854	1.35949894187755	0.000973101327479649	0.0226786157573151	Igfbp1	11	7147782	7152546	+	1525	protein_coding	insulin-like growth factor binding protein 1 [Source:MGI Symbol;Acc:MGI:96436]	-	2843	626	2668	1269	2266	2597	636	1267	1065	448	325	939	126.128473346878	27.809326920581	101.504472060388	46.290260372964	86.6795940874398	105.621479393117	25.8131138941148	45.0927703862443	43.6348568830676	21.2743221904178	13.2306792508867
ENSMUSG00000031545	4593.23749709919	4177.14152271786	4298.89567622763	5115.55127919444	4091.96269632161	5568.21335654314	3605.72860284732	3657.33369853059	3613.89912473789	3874.66028071711	3142.076919153	4418.00102904639	4640.83367135064	3718.61660917205	0.319847249652007	0.000978861117713036	0.0226897520111552	Gpat4	8	23661281	23698362	-	6682	protein_coding	glycerol-3-phosphate acyltransferase 4 [Source:MGI Symbol;Acc:MGI:2142716]	-	4315	3887	4643	5728	4438	5698	3687	4297	3684	3360	3235	3871	43.6898397561774	39.4088768246662	40.3145120379226	47.6863830695211	38.744283479248	52.8890923294127	34.1522870427715	34.9027003932723	34.4482323690388	36.415004497591	30.0563637093192
ENSMUSG00000038375	6624.26812154073	6663.86791416862	8663.52936516518	6981.19140179171	6080.77827450226	9611.95973586492	3171.51555710167	4139.07697834635	5601.34744903729	6525.80432398159	3141.10564344384	5265.99244330148	7437.59913550557	4640.8070658687	0.680560163086305	0.00097996990409033	0.0226897520111552	Trp53inp2	2	155222979	155231770	+	5257	protein_coding	transformation related protein 53 inducible nuclear protein 2 [Source:MGI Symbol;Acc:MGI:1915978]	-	6223	6201	9357	7817	6595	9836	3243	4863	5710	5659	3234	4614	80.0880919604887	79.9115845714453	103.268494953848	82.7179914021465	73.1818914322084	116.046135727848	38.1823010310562	50.2072505786875	67.8659484690713	77.9559518623343	38.1918470396895
ENSMUSG00000032525	566.304136374685	434.156206631853	500.905139099536	747.506358359942	547.684957551834	625.422349629275	392.160881405417	346.412570468222	377.674039908819	488.945225900016	458.442134726497	451.957738956954	570.329857941187	419.265431894321	0.445948124612709	0.00100702478863862	0.0231253386053024	Nktr	9	121548235	121585909	+	21283	protein_coding	natural killer tumor recognition sequence [Source:MGI Symbol;Acc:MGI:97346]	-	532	404	541	837	594	640	401	407	385	424	472	396	1.69116082694252	1.28598086998367	1.47480165138067	2.18771355735111	1.62809749088695	1.86507915900566	1.16617748731002	1.03791481510369	1.13026863546105	1.44271508702495	1.37682193802757
ENSMUSG00000018906	202.251477276673	169.793763979784	153.6973254908	246.489551860626	181.639623969211	192.512816995261	85.0822859907015	125.117070906213	154.01253056022	164.903696470996	101.983949462462	122.119894112106	191.064093262059	125.53657125045	0.608368995392034	0.00101916695528678	0.0233533741508063	P4ha2	11	53990921	54022491	+	6239	protein_coding	procollagen-proline, 2-oxoglutarate 4-dioxygenase (proline 4-hydroxylase), alpha II polypeptide [Source:MGI Symbol;Acc:MGI:894286]	-	190	158	166	276	197	197	87	147	157	143	105	107	2.06036772604457	1.71564760918872	1.5436978438626	2.46088852752546	1.84195089296927	1.95839991109356	0.863092599176232	1.2787996125065	1.57231102089589	1.6598491243429	1.0448235121744
ENSMUSG00000054203	35.1278881585801	6.44786445492852	23.1471875739157	15.1823274696762	42.4133132110848	21.4988932685063	19.559146204759	3.40454614710783	2.9429145966921	3.45951810778314	1.94255141833261	1.14130742160847	23.9695790227819	5.40833064938052	2.14004494503914	0.00102570610848871	1	Ifi205	1	173839564	173859376	-	4177	protein_coding	interferon activated gene 205 [Source:MGI Symbol;Acc:MGI:101847]	-	33	6	25	17	46	22	20	4	3	3	2	1	0.534509695969328	0.0973134261497872	0.34725197826951	0.226403059451632	0.642421642541914	0.326669317955688	0.296359358515599	0.051975139417041	0.0448756313053564	0.0520120943031788	0.0297258405666227
ENSMUSG00000057913	81.9650723700202	42.9857630328568	95.3664128045328	81.2701058670904	59.0098270762918	63.5194573842232	21.5150608252349	13.6181845884313	43.1627474181507	31.1356629700482	7.77020567333046	60.4892933452489	70.6861064225025	29.6151924700741	1.26509871231263	0.0010388624343689	0.0237161866522654	Gm10032	14	67021929	67031207	+	2253	lncRNA	predicted gene 10032 [Source:MGI Symbol;Acc:MGI:3642901]	-	77	40	103	91	64	65	22	16	44	27	8	53	2.31225462353117	1.20277609417861	2.65243792033501	2.24687051823663	1.65708806477783	1.7893788720405	0.604386304736628	0.385441912729659	1.22024005420163	0.867860923719219	0.220443561556649
ENSMUSG00000005198	1459.4040807701	1364.7979762932	1299.94605415111	1554.84894851214	1323.11096647623	1635.87033324907	1167.68102842411	1126.90477469269	1229.15732988507	1330.76129879391	1170.3872295454	970.1113083672	1439.66305990864	1165.83382828473	0.304413833152738	0.00104384589281882	0.0237857425892408	Polr2a	11	69624823	69649463	-	7067	protein_coding	polymerase (RNA) II (DNA directed) polypeptide A [Source:MGI Symbol;Acc:MGI:98086]	-	1371	1270	1404	1741	1435	1674	1194	1324	1253	1154	1205	850	13.1252772686005	12.1745976582503	11.5265997146023	13.7044472953212	11.8452332435755	14.6916475976879	10.4573672731037	10.1684098034793	11.0782145412471	11.8254664243032	10.5857243127475
ENSMUSG00000066232	1608.43148507923	1594.77180851899	1610.11836764158	1881.7155281534	1823.77246807664	1781.47647402214	1171.59285766506	1355.00936654892	1434.18038012128	1511.80941310123	1368.52747421533	1598.97169767347	1716.71435524866	1406.68186488755	0.288225405662521	0.00106755921242518	0.0241914432601589	Ipo7	7	109617481	109655816	+	11169	protein_coding	importin 7 [Source:MGI Symbol;Acc:MGI:2152414]	-	1511	1484	1739	2107	1978	1823	1198	1592	1462	1311	1409	1401	9.15284897618822	9.00130749761317	9.03346749578297	10.4941698695822	10.3309153584561	10.1233095744999	6.63889275021287	7.73622191989455	8.17874887304552	8.50033345189481	7.83186740039023
ENSMUSG00000019731	1021.90220097688	1176.73526302445	1061.99296589125	1216.372353747	1203.24725522751	1222.50524904097	946.662676310334	868.159267512498	900.531866587781	929.457198291069	1056.74797157294	1007.77445328028	1150.45921465135	951.555572259151	0.274470494077391	0.0010708144158329	0.0242205205437562	Slc35e1	8	73234485	73246458	-	4470	protein_coding	solute carrier family 35, member E1 [Source:MGI Symbol;Acc:MGI:2142403]	-	960	1095	1147	1362	1305	1251	968	1020	918	806	1088	883	14.5301411433891	16.5955856907267	14.8876136525889	16.9499112915743	17.0305939946082	17.3580097022294	13.4035845998102	12.384908304915	12.831840416223	13.0579523811282	15.1108883242617
ENSMUSG00000029196	473.694249411156	512.605224166817	508.312239123189	570.676897242536	557.827271580571	647.898465319077	419.54368609208	461.316002933112	370.807239183204	465.881771848129	341.88904962654	458.805583486605	545.169057807224	419.707222194945	0.378403994457999	0.00107646664624738	0.0242600912881716	Tada2b	5	36631014	36641629	-	3791	protein_coding	transcriptional adaptor 2B [Source:MGI Symbol;Acc:MGI:3035274]	MYB	445	477	549	639	605	663	429	542	378	404	352	402	7.94167937642125	8.5241401719069	8.40209824071988	9.37658983647847	9.30954375089188	10.8470060951764	7.00416927437264	7.7597128251767	6.23005394546865	7.71747342243636	5.76444503936528
ENSMUSG00000078566	5085.02793131931	4918.64593503464	6223.81579487446	6138.12568818146	4751.21310818956	5948.35287842718	3553.89686540471	3706.69961766365	4804.79856486596	4364.75867931972	3245.03214432463	5497.677849888	5510.86355600443	4195.47728691111	0.393701312917696	0.00107651439114586	0.0242600912881716	Bnip3	7	138492565	138511248	-	2265	protein_coding	BCL2/adenovirus E1B interacting protein 3 [Source:MGI Symbol;Acc:MGI:109326]	-	4777	4577	6722	6873	5153	6087	3634	4355	4898	3785	3341	4817	142.689875166301	136.898501439559	172.186658047572	168.801376100024	132.714612440975	166.680669277167	99.3047088134313	104.356642962184	135.115249093774	121.016681422821	91.5749927665125
ENSMUSG00000108425	238.443846894604	257.914578197141	411.094051312743	526.916071006411	271.998421679783	293.166726388723	53.7876520630872	127.670480516544	158.917388221373	245.625785652603	94.2137437891318	214.565795262392	333.255615913234	149.130140917522	1.16224260100072	0.00109807320110467	0.0245505156029432	Gm44706	7	79390426	79391764	+	815	lncRNA	predicted gene 44706 [Source:MGI Symbol;Acc:MGI:5753282]	-	224	240	444	590	295	300	55	150	162	213	97	188	18.5950149847299	19.9498493755907	31.607820950915	40.2709846123699	21.1150062487272	22.8304139615322	4.17693970727492	9.98927104348069	12.4197026330964	18.9264672039397	7.38895036597419
ENSMUSG00000022864	225.670069382393	235.347052604891	243.508413277593	299.181158961267	247.103650881972	352.777294087763	177.988230463307	131.075026663652	140.27892910899	239.859922139631	130.150945028285	233.968021429736	267.264606532647	175.553512472267	0.610870760117274	0.00109939615548109	0.0245505156029432	D16Ertd472e	16	78337226	78373596	-	6548	protein_coding	DNA segment, Chr 16, ERATO Doi 472, expressed [Source:MGI Symbol;Acc:MGI:1196400]	-	212	219	263	335	268	361	182	154	143	208	134	205	2.19044984364202	2.2657992680986	2.33032381172846	2.84599400872625	2.38755250139621	3.41939026862768	1.72034616199281	1.27647465757204	1.36452393660322	2.30039399939476	1.27047098581772
ENSMUSG00000020865	10980.1262532047	8058.75592458482	9193.13701685637	8105.57671263421	10039.9688599022	8297.59557922214	5423.75124257966	6088.17964756559	7042.39462988419	8991.28756212837	7100.99670971487	7646.75972477675	9112.52672440074	7048.89491944157	0.37058495558631	0.00112559905020531	0.0249992902976882	Abcc3	11	94234121	94283823	-	5698	protein_coding	ATP-binding cassette, sub-family C (CFTR/MRP), member 3 [Source:MGI Symbol;Acc:MGI:1923658]	-	10315	7499	9929	9076	10889	8491	5546	7153	7179	7797	7311	6700	122.476540442999	89.1593506354988	101.100257317501	88.6073784196129	111.478819198856	92.4243779291604	60.2435486374344	68.1343201776345	78.7218515489995	99.0952074470829	79.6568196154817
ENSMUSG00000037157	45.7727027520892	63.4040004734637	59.2568001892243	63.4085441380596	91.280826258639	63.5194573842232	6.84570117166564	16.1715941987622	39.2388612892279	56.5054624271245	27.1957198566566	21.6848410105609	64.4403885326165	27.9403633256663	1.2145575192784	0.00113046607553368	0.0250460207065504	Il22ra1	4	135455483	135479451	+	2569	protein_coding	interleukin 22 receptor, alpha 1 [Source:MGI Symbol;Acc:MGI:2663588]	-	43	59	64	71	99	65	7	19	40	49	28	19	1.13242767499141	1.55587210851382	1.44539006378873	1.53741845379049	2.24800823268113	1.56927621592341	0.168650277999953	0.401411345811077	0.972858502465154	1.3812730475301	0.676647607884375
ENSMUSG00000057738	2606.91509395038	2251.37933884587	2390.64153263402	2473.82629947077	2754.09927307631	2559.34552137355	1952.98074854518	1919.31289043204	2015.89649873409	2211.78524357602	2375.74038462079	2126.25572645658	2506.03450989182	2100.32858206078	0.255156218692237	0.00113607094318954	0.0250953566347196	Sptan1	2	29855572	29921463	+	13431	protein_coding	spectrin alpha, non-erythrocytic 1 [Source:MGI Symbol;Acc:MGI:98386]	-	2449	2095	2582	2770	2987	2619	1997	2255	2055	1918	2446	1863	12.3363464963606	10.5672423156994	11.1536518417522	11.4727958355456	12.9733961747823	12.0942039919294	9.2028605536362	9.11251684187572	9.55998627758874	10.3416018996003	11.3062016592372
ENSMUSG00000042510	142.640515553022	134.330509477677	98.1440753134027	211.659506489016	130.006025277455	122.152802661968	39.1182924095179	57.8772845008332	97.1161816908392	101.479197828305	41.7648554941512	115.272049582455	139.822239128757	75.4379769176837	0.895747669451718	0.00115283448931333	0.0253088466725066	AA986860	1	130659713	130672359	+	3640	protein_coding	expressed sequence AA986860 [Source:MGI Symbol;Acc:MGI:2138143]	-	134	125	106	237	141	125	40	68	99	88	43	101	2.49063185155312	2.3264547906803	1.68956022420401	3.6219696558029	2.25966748283897	2.12989782264753	0.680161011274537	1.0139293062815	1.69936865240704	1.75076900875323	0.733391201924679
ENSMUSG00000019822	1322.08597251383	1038.10617724349	1012.92092823455	1026.14672133282	971.818089662681	975.26797645315	615.13514813967	748.149015826947	917.208382635703	959.439688558523	726.514230456398	891.361096276215	1057.72431090676	809.634593648909	0.386154113546482	0.00115396141805925	0.0253088466725066	Smpd2	10	41361638	41366365	-	4468	protein_coding	sphingomyelin phosphodiesterase 2, neutral [Source:MGI Symbol;Acc:MGI:1278330]	-	1242	966	1094	1149	1054	998	629	879	935	832	748	781	18.8067847730619	14.6470427809878	14.2060504518847	14.3055549350881	13.7611349390158	13.8537554490387	8.71345929372051	10.6776543367411	13.0753173444429	13.4852103026292	10.393386007497
ENSMUSG00000038244	417.276732065558	268.661018955355	316.653526011167	371.520483963842	393.706190024635	538.449554133954	297.299022312336	196.612539995477	150.088644431297	261.770203488924	324.406086861546	275.055088607641	384.377917525752	250.871930949537	0.616582800988246	0.00115640133745107	0.0253171501364957	Mical2	7	111825063	112012313	+	15218	protein_coding	microtubule associated monooxygenase, calponin and LIM domain containing 2 [Source:MGI Symbol;Acc:MGI:2444947]	-	392	250	342	416	427	551	304	231	153	227	334	241	1.74274806952103	1.11293145460327	1.30388029314038	1.52066516045649	1.63680560032351	2.24566080642123	1.23642884846227	0.823862142638495	0.628185116972411	1.08022901748574	1.36256588380948
ENSMUSG00000052229	81.9650723700202	73.0757971558565	80.5522127572267	107.169370374185	89.4367691625048	104.562799078644	27.3828046866626	22.9806864929779	38.2578897569973	69.1903621556627	81.5871595699698	36.521837491471	89.4603368164063	45.9867900256235	0.965323724811573	0.00116044295249961	0.0253604276558722	Gpr17	18	32076050	32082689	-	5195	protein_coding	G protein-coupled receptor 17 [Source:MGI Symbol;Acc:MGI:3584514]	-	77	68	87	120	97	107	28	27	39	60	84	32	1.0027930061243	0.886766644526178	0.971634430422803	1.28497163018214	1.08921343468663	1.27746310523928	0.333599664432632	0.282083938802429	0.469064803755949	0.836398528987018	1.00383505562365
ENSMUSG00000050229	353.407844504503	330.990375352997	327.764176046647	308.111939825782	385.407933092031	366.458407985903	270.894174935912	237.467093760771	241.318996928752	281.374139433028	311.779502642385	255.652862440297	345.356779467977	266.414461690191	0.375022538570649	0.00117422185310278	0.0255705546095893	Pigm	1	172204113	172211666	+	7554	protein_coding	phosphatidylinositol glycan anchor biosynthesis, class M [Source:MGI Symbol;Acc:MGI:1914806]	-	332	308	354	345	418	375	277	279	246	244	321	224	2.97349509399479	2.76222927712734	2.71891403592288	2.54062144612644	3.22794486645482	3.0789626983467	2.26963444680928	2.00459835515123	2.03475403507054	2.33916257914872	2.63813293427438
ENSMUSG00000057110	650.398171663407	624.368208052245	676.823764661296	711.78323490188	585.488128022583	632.262906578345	444.970576158267	293.642105188051	529.724627404577	578.892696702378	508.948471603145	505.599187772552	646.854068979959	476.962944138162	0.441483546448033	0.00117685044307636	0.025582437419228	Cntrl	2	34999504	35068834	+	10194	protein_coding	centriolin [Source:MGI Symbol;Acc:MGI:1889576]	-	611	581	731	797	635	647	455	345	540	502	524	443	4.05511060290674	3.86115726860688	4.16046567067845	4.34922161089905	3.63375718148348	3.93649579294545	2.76261199448913	1.83685389160335	3.3098089222332	3.56620783428153	3.19120924507133
ENSMUSG00000060012	1297.60289894876	1150.94380520474	1167.54414122831	1215.47927566055	1228.14202602532	1603.62199334631	767.69648853679	991.574065345157	793.605969574635	1169.3171204307	1155.81809390791	958.698234151115	1277.22235673567	972.784995324384	0.393126633709666	0.00118066259361365	0.0256199610861534	Kif13b	14	64884714	65047066	+	13017	protein_coding	kinesin family member 13B [Source:MGI Symbol;Acc:MGI:1098265]	-	1219	1071	1261	1361	1332	1641	785	1165	809	1014	1190	840	6.33576300706506	5.57396906456461	5.6204796133832	5.81627678496175	5.96925493350763	7.81893884621716	3.73260365985992	4.8575263752574	3.88321474936983	5.64124045876006	5.67550721731857
ENSMUSG00000055980	286.345512565395	164.420543600677	151.845550484887	253.634176552238	248.025679430039	262.872831328555	104.641432195461	154.906849693406	118.697555399915	141.840242419109	180.657281904933	181.467880035747	227.857382326965	147.035206941428	0.632666554149896	0.00118983300383337	0.0256635614856984	Irs1	1	82210822	82269137	-	9144	protein_coding	insulin receptor substrate 1 [Source:MGI Symbol;Acc:MGI:99454]	-	269	153	164	284	269	269	107	182	121	123	186	159	1.99031669389825	1.13355135785273	1.04058323783904	1.72774628512151	1.71610109989313	1.82459383379138	0.724270315702118	1.08027746710374	0.826804715203386	0.974128962607119	1.26283133774615
ENSMUSG00000022280	654.656097500811	553.441699048031	645.343589560771	751.078670705748	592.86435640712	742.689040184764	434.213045745649	538.769427779815	556.210858774806	515.468198059687	390.452835084855	574.077633069061	656.678908901207	501.531999752312	0.389691310488517	0.00119311949261796	0.0256635614856984	Rnf19a	15	36240079	36283293	-	4434	protein_coding	ring finger protein 19A [Source:MGI Symbol;Acc:MGI:1353623]	-	615	515	697	841	643	760	444	633	567	447	402	503	9.38394708273047	7.86860108364327	9.12024036736603	10.5511100349715	8.45944928603646	10.6308513063998	6.19784066295363	7.74833105544501	7.98989665333954	7.3006141560109	5.62858187762818
ENSMUSG00000048706	1252.89467765602	1210.04922937492	1519.38139235183	1645.94291333019	1073.24122995006	1429.67640235567	719.77658033513	977.104744219949	988.819304488544	1047.0808139557	622.587729575603	1374.1341356166	1355.19764083645	954.91721803192	0.505832261545331	0.00120838944093698	0.0259465718769021	Lurap1l	4	80828883	80873865	+	3066	protein_coding	leucine rich adaptor protein 1-like [Source:MGI Symbol;Acc:MGI:106510]	-	1177	1126	1641	1843	1164	1463	736	1148	1008	908	641	1204	25.9723014793254	24.8801061011713	31.0531474652745	33.438826651015	22.1466293275814	29.5952706403166	14.8579464745999	20.3221608473612	20.5419739136957	21.4467386667944	12.9793965926268
ENSMUSG00000028668	780.264909704219	701.742581511387	623.122289489811	748.399436446393	721.026324588441	643.012353212598	619.046977380622	584.730800765771	572.887374822728	544.297515624547	525.460158658972	592.338551814796	702.927982492141	573.126896511239	0.294095601536013	0.00122308585557694	0.0262163010090681	Eloa	4	135730679	135749074	-	4708	protein_coding	elongin A [Source:MGI Symbol;Acc:MGI:1351315]	-	733	653	673	838	782	658	633	687	584	472	541	519	10.5335228949231	9.3964263739402	8.29369013088328	9.90160072315073	9.68940493102352	8.66841269835096	8.32185954385029	7.91991334409524	7.75050828278707	7.26027559125364	7.13393970914502
ENSMUSG00000078817	585.464802643002	526.575597152495	824.965765134357	541.205320389635	731.168638617179	557.016780138573	254.268900661867	221.295499562009	465.961477809582	484.332535089639	133.064772155784	378.914063974012	627.732817345873	322.972874875482	0.959781534386855	0.00122878381690958	0.0262925485004938	Nlrp12	7	3267458	3298370	-	7545	protein_coding	NLR family, pyrin domain containing 12 [Source:MGI Symbol;Acc:MGI:2676630]	-	550	490	891	606	793	570	260	260	475	420	137	332	4.93184669773334	4.39969756358635	6.85153144222389	4.46798004969131	6.13113318440596	4.68560583425218	2.13288396643546	1.87031282006941	3.93358154107245	4.03123028583339	1.12727518478524
ENSMUSG00000007777	270.378290675132	327.766443125533	291.654563431338	309.898095998686	271.998421679783	277.531167647991	244.489327559487	195.7614034587	244.261911525444	230.634540518876	164.145594849106	225.978869478477	291.53783042641	217.545274565015	0.423609347222552	0.00124747256220754	0.026587270139808	0610009B22Rik	11	51576213	51579701	-	998	protein_coding	RIKEN cDNA 0610009B22 gene [Source:MGI Symbol;Acc:MGI:1913300]	-	254	305	315	347	295	284	250	230	249	200	169	198	17.2190544123467	20.7040489668398	18.3125661991182	19.3417951212616	17.2432165257642	17.6497248347904	15.5046723511981	12.5082755985334	15.5891558044943	14.5126598466518	10.5129545550633
ENSMUSG00000027357	1822.39225840876	1644.20543600677	1576.78641753514	1613.79210221794	1681.78007167432	1524.46697722136	1143.23209566816	1248.6172994518	1360.60751520398	1450.69125986373	1025.66714887962	1601.25431251668	1643.90387717738	1305.011605264	0.3337048649486	0.00125277495953174	0.026587270139808	Crls1	2	132688586	132708705	+	2082	protein_coding	cardiolipin synthase 1 [Source:MGI Symbol;Acc:MGI:1913836]	-	1712	1530	1703	1807	1824	1560	1169	1467	1387	1258	1056	1403	55.6325745074574	49.7847916244254	47.4573100294651	48.2808905986422	51.1058852946286	46.4722835585849	34.7525687888444	38.2427870827433	41.6245477252563	43.7569938398507	31.4884886804521
ENSMUSG00000036501	365.117140557363	263.287798576248	335.1712760703	501.909884585767	486.831073379408	498.383434860828	264.048473764246	364.286437740538	260.938427573366	291.752693756378	196.197693251594	279.620318294075	408.450101338319	276.140674063366	0.565091782791742	0.00125464218057051	0.026587270139808	Fam13b	18	34575404	34639884	-	9061	protein_coding	family with sequence similarity 13, member B [Source:MGI Symbol;Acc:MGI:2447834]	-	343	245	362	562	528	510	270	428	266	253	202	245	2.5610857087214	1.83179108913249	2.31793703913427	3.45030931258827	3.39926168546978	3.49095448004668	1.84433904061532	2.5637034362557	1.83425325321039	2.02205028987998	1.38402476997297
ENSMUSG00000036473	928.227832553995	815.654853548457	794.411477536788	888.612696019286	848.266264221695	786.664049143072	592.642130004197	511.533058602952	537.572399662423	792.229646682338	656.582379396423	793.208658017887	843.639528837215	647.294712061037	0.383989880434858	0.00125599572815282	0.026587270139808	Tbc1d24	17	24394405	24424536	-	8557	protein_coding	TBC1 domain family, member 24 [Source:MGI Symbol;Acc:MGI:2443456]	-	872	759	858	995	920	805	606	601	548	687	676	695	6.89447301360823	6.00905573214902	5.81748069815512	6.46843761511262	6.27181302067915	5.83478003966042	4.38333050458638	3.81200171100658	4.00140783590181	5.81410361109063	4.90448925836305
ENSMUSG00000003721	2355.69746954357	1392.73872226456	1687.89291788993	2539.91407786819	1759.23046971195	2801.69668185489	1382.83163667646	1077.53885555963	1894.25602873748	1276.56218177198	994.586326186298	1100.22035443057	2089.52838985552	1287.66589722707	0.698449991221941	0.00127803016941513	0.0269241278572155	Insig2	1	121232082	121260318	-	3473	protein_coding	insulin induced gene 2 [Source:MGI Symbol;Acc:MGI:1920249]	-	2213	1296	1823	2844	1908	2867	1414	1266	1931	1107	1024	964	43.1104696065874	25.2805318462352	30.4544724286953	45.5535947496316	32.0479603106735	51.2003641564316	25.199838170095	19.7846817735924	34.7401174392491	23.0829015567853	18.3047498001592
ENSMUSG00000033904	220.347662085639	218.152747391748	177.770400567673	270.602660194818	260.012050554911	299.030060916497	128.112407641171	177.036399649607	153.031559027989	199.498877548827	132.093496446618	202.011413624699	240.985930285214	165.297358989819	0.546492186210718	0.00128950913586711	0.027119436997808	Ccp110	7	118311775	118336247	+	8256	protein_coding	centriolar coiled coil protein 110 [Source:MGI Symbol;Acc:MGI:2141942]	-	207	203	192	303	282	306	131	208	156	173	136	177	1.69631610073564	1.66575966466035	1.34927582626209	2.04160062226992	1.99253624940258	2.29880367323422	0.982097797408401	1.36739440188214	1.18061611216674	1.51748351087926	1.0226754906954
ENSMUSG00000038582	426.857065199716	517.978444545924	650.89891457851	744.827124100587	403.848504053372	651.80735500426	342.285058583282	288.535285967389	454.189819422814	379.393819153551	418.619830650678	479.349117075557	566.036234580395	393.728821808878	0.525225212182503	0.00130140970567224	0.0273229299231905	Pptc7	5	122422428	122462344	+	4719	protein_coding	PTC7 protein phosphatase homolog [Source:MGI Symbol;Acc:MGI:2444593]	-	401	482	703	834	438	667	350	339	463	329	431	420	5.74910867752937	6.91963280551433	8.64319960840784	9.83136722836062	5.4144075199846	8.766495148378	4.59061839565459	3.89896976795658	6.13034343707178	5.04886179208451	5.67016786778591
ENSMUSG00000036391	2951.80708678008	2657.59479950637	3223.01439779203	3329.39510629135	2901.62384076704	3537.54516509059	2138.79263749039	2158.48225726637	2563.27861371882	2956.73480945199	2633.12844754986	2555.38731698136	3100.16339937124	2500.96734707646	0.310364091676119	0.00131769632976321	0.027570607022405	Sec24a	11	51583091	51654461	-	10683	protein_coding	Sec24 related gene family, member A (S. cerevisiae) [Source:MGI Symbol;Acc:MGI:1924621]	-	2773	2473	3481	3728	3147	3620	2187	2536	2613	2564	2711	2239	17.561546754195	15.6825570482918	18.9051440140773	19.4124576140225	17.1842396843922	21.0167463292797	12.670935503213	12.8841617295439	15.282695958	17.3809037382391	15.7545104616132
ENSMUSG00000019232	1672.30037264028	2614.60903647351	1998.06523138041	2831.05753405139	1399.6393359658	1808.83870181842	998.494413752946	1600.13668914068	1230.1383014173	1366.50965257434	1758.00903359102	1668.59145039158	2054.0850353883	1436.97992347798	0.51546972132053	0.00133583552880172	0.0278552325377636	Etnppl	3	130411097	130431170	+	8262	protein_coding	ethanolamine phosphate phospholyase [Source:MGI Symbol;Acc:MGI:1919010]	-	1571	2433	2158	3170	1518	1851	1021	1880	1254	1185	1810	1462	12.8646245941637	19.9500002912995	15.1542848005524	21.343808552796	10.7179909985016	13.8954100854833	7.64880655029394	12.3501662977658	9.48344517069885	10.3867749421725	13.6007233868722
ENSMUSG00000003382	436.437398333874	407.290104736318	407.390501300917	441.180574707062	396.472275668836	443.658979268267	279.695790728053	359.179618519877	357.073637731974	319.428838618643	364.228390937365	330.979152266456	422.071639002546	335.097571467061	0.33197241481023	0.00133918989100673	0.0278778478666859	Etv3	3	87432714	87447463	+	10274	protein_coding	ets variant 3 [Source:MGI Symbol;Acc:MGI:1350926]	ETS	410	379	440	494	430	454	286	422	364	277	375	290	2.69991703100557	2.49911152114534	2.48474777427279	2.67476254273355	2.44149422431032	2.74073112384224	1.72297746539139	2.22932320419461	2.21368393856143	1.9524852851701	2.26600221518121
ENSMUSG00000056050	5217.02363227882	4993.87102034214	4917.38852820266	5151.2744026525	5173.50218320427	4686.75873253438	4061.4567094182	4402.07816821043	4600.75648616198	4248.28823635769	4507.69056624083	4567.5123012771	5023.30308320246	4397.96374461104	0.191801971262523	0.00135675240539189	0.0281480287888905	Mia3	1	183107682	183150894	-	7161	protein_coding	MIA SH3 domain ER export factor 3 [Source:MGI Symbol;Acc:MGI:2443183]	-	4901	4647	5311	5768	5611	4796	4153	5172	4690	3684	4641	4002	46.3038552568546	43.9627637489071	43.0300472379488	44.8073668775504	45.7081245400396	41.5389620946793	35.8956137220929	39.199902729655	40.9216334359261	37.2557670697635	40.2352327952185
ENSMUSG00000043940	1274.18430684304	986.523261604063	960.145340566024	1450.35881239731	1042.81428786385	1293.84248579556	804.858866325832	773.683111930255	935.846841748087	1022.86418720121	998.471429022964	863.969718157612	1167.97808251164	899.949025730994	0.376686631054562	0.00139653999775963	0.0287308278936076	Wdfy3	5	101980822	102217787	-	15346	protein_coding	WD repeat and FYVE domain containing 3 [Source:MGI Symbol;Acc:MGI:1096875]	-	1197	918	1037	1624	1131	1324	823	909	954	887	1028	757	5.27721854096116	4.05259753012069	3.92060200500799	5.8869273496487	4.29926502900509	5.35109832949541	3.31938606916356	3.21491012359226	3.88424819523437	4.18577604112219	4.15878572449149
ENSMUSG00000022098	4199.37935713935	4278.15806584507	4827.57744041586	4510.04433658029	4383.3237175108	4606.62649398813	3131.41930738191	2794.28125023876	3660.98575828497	4760.29691630959	2812.81445374563	3704.68389054109	4467.51823524658	3477.41359608366	0.3618767837865	0.00140135692467888	0.0287817152991739	Bmp1	14	70711998	70757674	-	8870	protein_coding	bone morphogenetic protein 1 [Source:MGI Symbol;Acc:MGI:88176]	-	3945	3981	5214	5050	4754	4714	3202	3283	3732	4128	2896	3246	30.0905073801784	30.4056677690928	34.1048859977015	31.6712791008276	31.2652830377606	32.9621930488352	22.3434809230211	20.0884953935617	26.2888632335194	33.7026174336442	20.2695245316507
ENSMUSG00000118671	177.768403711602	186.988069192927	178.696288070629	381.344342914809	144.758482046528	243.32838290264	112.465090677364	62.9841037214949	83.3825802396094	191.426668630667	134.03604786495	152.935194495535	218.813994806523	122.871614271603	0.837135902833706	0.00140812251060283	0.0288242677920398	Eppk1	15	75973330	76004395	-	12332	protein_coding	epiplakin 1 [Source:MGI Symbol;Acc:MGI:2386306]	-	167	174	193	427	157	249	115	74	85	166	138	134	0.916197448890466	0.955876358238905	0.908014927193403	1.92615930994296	0.742664976485564	1.25232188811859	0.577188208156668	0.325685445254795	0.430664626359884	0.974814844094679	0.69472702621051
ENSMUSG00000038594	910.13164774503	840.37166729235	1176.80301625788	1218.15850991991	778.192094568599	914.680186332814	536.898563320634	365.137574277315	673.92744264249	792.229646682338	481.752751746488	1008.91576070189	973.056187019429	643.143623228525	0.59896801200503	0.00142954965609237	0.029142405089208	Cep85l	10	53149539	53256043	-	7986	protein_coding	centrosomal protein 85-like [Source:MGI Symbol;Acc:MGI:3642684]	-	855	782	1271	1364	844	936	549	429	687	687	496	884	7.24340772508943	6.6338162109448	9.23390580174077	9.50129734539407	6.16509747916885	7.2693684724999	4.2549666869853	2.9156012866578	5.37503408958257	6.22981274732063	3.85585766836991
ENSMUSG00000000876	2955.00053115813	2448.03920472119	2854.51117161529	3079.33324208492	2767.92970129731	2992.25505400756	1834.64791400639	2100.60497276553	2523.05878089736	2789.5247675758	1797.83133766683	2409.29996701548	2849.5114841474	2242.49462332123	0.34609472924076	0.00143250340397332	0.029142405089208	Pxmp4	2	154427678	154445628	-	3114	protein_coding	peroxisomal membrane protein 4 [Source:MGI Symbol;Acc:MGI:1891701]	-	2776	2278	3083	3448	3002	3062	1876	2468	2572	2419	1851	2111	60.3124508298528	49.5588362438992	57.4412803505904	61.595146728777	56.2365780981718	60.9869224506771	37.2878507388388	43.0156702253863	51.6067069971614	56.2554783569568	36.9025548366402
ENSMUSG00000027660	311.893067589817	177.316272510534	404.612838792047	537.633008043829	447.183845812524	648.875687740373	193.635547427114	176.18526311283	148.126701366836	340.185947265342	134.03604786495	245.381095645821	421.252453414854	206.258433780482	1.03188194951728	0.00145243179988605	0.0293755970727396	Skil	3	31149207	31176726	+	9694	protein_coding	SKI-like [Source:MGI Symbol;Acc:MGI:106203]	-	293	165	437	602	485	664	198	207	151	295	138	215	2.04489365811629	1.15309985333822	2.61545719530543	3.45454871270487	2.91853919599601	4.24830026113156	1.26419858687277	1.15895741103804	0.973257420615278	2.20377150064616	0.883781069447907
ENSMUSG00000044768	415.147769146856	421.260477721996	417.57526383344	506.375275018025	384.485904543964	444.636201689562	318.814083137571	304.706880166151	427.703588052585	282.527312135623	288.468885622393	345.816148747366	431.580148658974	328.006149643615	0.396088432907023	0.00150379767530492	0.0301299234063541	Macir	1	97534043	97589799	-	41324	protein_coding	macrophage immunometabolism regulator [Source:MGI Symbol;Acc:MGI:1277184]	-	390	392	451	567	417	455	326	358	436	245	297	303	0.638510990769847	0.642642882920511	0.63320361288115	0.763270629629565	0.588654555292791	0.682903256968121	0.488279366965212	0.470198046713187	0.659231465295699	0.4293498280787	0.446192966628285
ENSMUSG00000019726	669.558837931724	697.444005208101	804.596240069311	916.298116699283	733.012695713313	745.620707448651	421.499600712556	494.510327867413	587.601947806189	705.74169398776	500.206990220648	704.186679132426	761.088433845064	568.957873287832	0.421816457106066	0.00150773265305462	0.0301595642423728	Lyst	13	13764982	13953388	+	17459	protein_coding	lysosomal trafficking regulator [Source:MGI Symbol;Acc:MGI:107448]	-	629	649	869	1026	795	763	431	581	599	612	515	617	2.43745947308618	2.51832235033461	2.88781658742971	3.26908220062476	2.65628439388875	2.71053683294366	1.52795664260259	1.80616288758568	2.14368638267792	2.53851432799663	1.83128731783301
ENSMUSG00000004069	2118.31810410832	2102.0038123067	2465.6384203735	2388.09080317143	2208.25837262061	2383.44548554031	1724.1387379495	1762.70376766508	1905.04671559202	2171.42419898521	1873.59084298181	2039.51636241434	2277.62583302014	1912.73677093133	0.252730684948846	0.00156027117113974	0.0310084959934276	Dnaja3	16	4457853	4525559	+	3912	protein_coding	DnaJ heat shock protein family (Hsp40) member A3 [Source:MGI Symbol;Acc:MGI:1933786]	-	1990	1956	2663	2674	2395	2439	1763	2071	1942	1883	1929	1787	34.4159968560383	33.8731817523051	39.494945191576	38.0242277024989	35.7135875463995	38.6690136473452	27.8937299391124	28.7330282375674	31.0173129031291	34.8577247114812	30.6127260652152
ENSMUSG00000057530	5515.07844089708	6496.22343834048	6609.91088360737	6698.08564838657	6411.78652325834	6649.99857691752	4696.15100376263	5426.84655848989	5882.8862787875	5784.3142762134	5340.07384899636	5460.01470497492	6396.84725190123	5431.71444520412	0.236099196652652	0.00158241844036888	0.031347198846146	Ece1	4	137589548	137692540	+	5300	protein_coding	endothelin converting enzyme 1 [Source:MGI Symbol;Acc:MGI:1101357]	-	5181	6045	7139	7500	6954	6805	4802	6376	5997	5016	5498	4784	66.1369017000056	77.2692013934658	78.1503104374446	78.7196653159932	76.5395005210899	79.634709504217	56.0788903827868	65.2938963788488	70.6987883798084	68.5376516860604	64.4017234514351
ENSMUSG00000113880	15.9672218902637	13.9703729856785	15.7400875502627	7.14462469161235	10.1423140287377	0.977222421295742	2.93387193071385	0	1.9619430644614	0	0	3.42392226482541	10.6569739279751	1.38662287666678	2.96362070467201	0.00158674767360375	1	A030005L19Rik	1	82891046	82891851	+	806	protein_coding	RIKEN cDNA A030005L19 gene [Source:MGI Symbol;Acc:MGI:1925172]	-	15	13	17	8	11	1	3	0	2	0	0	3	1.25910613583571	1.09268328233242	1.22372286476127	0.552144550768919	0.796130845017621	0.0769511471408138	0.230377116722021	0	0.155041779952418	0	0
ENSMUSG00000035673	1180.50993842016	1029.50902463692	1294.39072913337	1202.97618245023	1315.73473809169	1151.16801228638	1045.43636464437	737.935377385623	1038.84885263231	1138.18145746065	818.785422827197	816.034806450056	1195.71477083646	932.537046900034	0.359541457598513	0.00158696300965871	0.0313659641622555	Sbno2	10	79892826	79941405	-	10715	protein_coding	strawberry notch 2 [Source:MGI Symbol;Acc:MGI:2448490]	-	1109	958	1398	1347	1427	1178	1069	867	1059	987	843	715	7.00237707849615	6.05702438053351	7.56979626877452	6.99315679150608	7.76888342567477	6.81872625044276	6.17502407986708	4.39164340686183	6.17529311458266	6.67071734862719	4.88431902881185
ENSMUSG00000025003	233.12143959785	275.108883410283	275.914475881075	332.225048159974	288.59493554499	336.164512925735	146.693596535692	164.269351597953	231.509281606445	216.796468087743	92.2711923707992	267.065936656382	290.188215919985	186.434304475836	0.641287060208428	0.00158847335197223	0.0313659641622555	Cyp2c39	19	39499306	39556973	+	1817	protein_coding	cytochrome P450, family 2, subfamily c, polypeptide 39 [Source:MGI Symbol;Acc:MGI:1306818]	-	219	256	298	372	313	344	150	193	236	188	95	234	8.15446195050099	9.544892161354	9.51547630034252	11.3890069445615	10.0488466162683	11.7423130769679	5.10963005167718	5.76504270329956	8.11541750562168	7.49290944157458	3.24591618724391
ENSMUSG00000114284	7.45137021545639	4.29857630328568	3.70355001182652	7.14462469161235	4.6101427403353	12.7038914768446	0	0	0.980971532230699	0	1.94255141833261	0	6.65202590656014	0.487253825093885	3.7195898344363	0.00159863905524245	1	9630015K15Rik	14	64353763	64365054	+	572	lncRNA	RIKEN cDNA 9630015K15 gene [Source:MGI Symbol;Acc:MGI:1925819]	-	7	4	4	8	5	13	0	0	1	0	2	0	0.827957671140452	0.473750793738533	0.40572629740748	0.778021866992567	0.509918516436906	1.40960510444309	0	0	0.109233981330113	0	0.21707139169018
ENSMUSG00000018476	755.781836139148	857.565972505493	846.261177702359	924.335819477347	797.554694078007	924.452410545772	731.512068057986	703.889915914545	733.766706108563	762.247156414884	575.96649553562	630.001696727875	850.991985074687	689.564006459912	0.303802959518643	0.0016010104349221	0.0315627771456071	Kdm6b	11	69289334	69304501	-	6954	protein_coding	KDM1 lysine (K)-specific demethylase 6B [Source:MGI Symbol;Acc:MGI:2448492]	-	710	798	914	1035	865	946	748	827	748	661	593	552	6.90764142741198	7.77417286118478	7.62571736033254	8.27948852633268	7.25618301877056	8.43736020525441	6.65763585209019	6.4546243214085	6.72079584641598	6.88357953862496	5.29405721712268
ENSMUSG00000024824	84.0940352887221	101.016543127213	127.772475408015	82.163183953542	86.6706835183036	85.0183506527295	63.5672251654667	61.281830647941	60.8202349983033	62.2713259400964	57.3052668408121	63.9132156100743	94.4558786580876	61.5265165337823	0.619303426177051	0.00160672838382988	0.0315718128309489	Rad9a	19	4245195	4251661	-	2362	protein_coding	RAD9 checkpoint clamp component A [Source:MGI Symbol;Acc:MGI:1328356]	-	79	94	138	92	94	87	65	72	62	54	59	56	2.26283725919286	2.69608728595824	3.38975561093955	2.16673490308091	2.32153249718709	2.28449125309405	1.70328212603255	1.65444658433939	1.64008209732901	1.65562291375055	1.55074625884001
ENSMUSG00000040170	2835.77860771083	2732.81988481387	3398.00713585083	3419.59599302296	3534.13542474104	4117.03806091896	1062.06163891841	1516.72530853654	1928.59003236555	3046.68228025435	1492.85076498861	2656.96367750452	3339.56251784308	1950.64561709466	0.776001918317372	0.00160983398452772	0.0315718128309489	Fmo2	1	162701886	162726295	-	5609	protein_coding	flavin containing monooxygenase 2 [Source:MGI Symbol;Acc:MGI:1916776]	-	2664	2543	3670	3829	3833	4213	1086	1782	1966	2642	1537	2328	32.1332685466009	30.7147445876669	37.962064207955	37.9749990378124	39.8639368601719	46.586079055237	11.9838816366941	17.2433802990174	21.9003908312963	34.1110379927121	17.0120656983335
ENSMUSG00000035840	491.790434220121	425.559054025282	433.315351383702	469.759073473512	526.478300946291	663.534024059809	289.475363830433	325.985293585575	366.883353054281	468.188117253318	294.296539877391	434.838127632827	501.73937301812	363.277799205638	0.46796065586663	0.00161074593213293	0.0315718128309489	Lysmd3	13	81805782	81820990	+	4250	protein_coding	LysM, putative peptidoglycan-binding, domain containing 3 [Source:MGI Symbol;Acc:MGI:1915906]	-	462	396	468	526	571	679	296	383	374	406	303	381	7.35460188256337	6.31236704654721	6.38890040651723	6.88485279899375	7.8374355995525	9.909026376551	4.31078047051552	4.8911388390075	5.49840168423256	6.91806543287666	4.42611121437355
ENSMUSG00000030545	5555.52873635241	4609.14844119807	5384.96171719575	5684.44202026407	4390.69994589534	5332.70275301086	1806.28715200949	2344.88115882052	4253.49256375231	4439.71490498836	1515.19010629944	3318.92198203743	5159.58060231942	2946.41464465126	0.808416135134407	0.00163269900803031	0.0318804598038605	Pex11a	7	79385705	79392879	-	3182	protein_coding	peroxisomal biogenesis factor 11 alpha [Source:MGI Symbol;Acc:MGI:1338788]	-	5219	4289	5816	6365	4762	5457	1847	2755	4336	3850	1560	2908	110.966846592894	91.314944397006	106.045786561355	111.274609243762	87.300357627649	106.366267258838	35.9269083255784	46.9917452455548	85.1418122637005	87.6209819748434	30.4363834432717
ENSMUSG00000021127	3418.04996597578	2950.97263220562	3890.57928742376	3758.07258778809	3925.99755766954	3867.84634348855	3314.29732439641	2625.75621595692	2856.58910185579	2901.38251972746	3430.5458047754	2413.86519670191	3635.25306242522	2923.73936056898	0.314296902231764	0.00165267380111616	0.0321418969808887	Zfp36l1	12	80154528	80159787	-	2990	protein_coding	zinc finger protein 36, C3H type-like 1 [Source:MGI Symbol;Acc:MGI:107946]	zf-CCCH	3211	2746	4202	4208	4258	3958	3389	3085	2912	2516	3532	2115	72.6566283288246	62.2178977202875	81.5368735598633	78.2892960420694	83.0732642534671	82.1021900163789	70.1541724802863	55.999497107798	60.8518763472378	60.9378335615847	73.3361539995379
ENSMUSG00000040565	305.506178833712	364.304341703461	418.501151336396	498.337572239961	393.706190024635	512.064548758969	328.593656239951	291.939832114497	307.044089588209	334.42008375237	209.795553179922	326.413922580022	415.403330482856	299.701189575828	0.472845997652539	0.00165468141708209	0.0321418969808887	Btaf1	19	36903479	36990152	+	10259	protein_coding	B-TFIID TATA-box binding protein associated factor 1 [Source:MGI Symbol;Acc:MGI:2147538]	-	287	339	452	558	427	524	336	343	313	290	216	286	1.89270526402046	2.2386214278256	2.55624573147772	3.02570800540037	2.42800542213892	3.16793598674723	2.02715694324303	1.81463480771343	1.90630812763603	2.04710693674723	1.30712567433985
ENSMUSG00000089712	226.734550841744	255.765290045498	399.057513774307	295.608846615461	194.54802364215	316.62006449982	61.6113105449908	73.1977421628184	166.765160479219	179.894941604723	47.592509749149	208.85925815435	281.389048236497	122.986820449208	1.19653606963734	0.00166859342395245	0.032225284506486	Gm15889	8	95104458	95106951	+	2494	lncRNA	predicted gene 15889 [Source:MGI Symbol;Acc:MGI:3802159]	-	213	238	431	331	211	324	63	86	170	156	49	183	5.77815619321045	6.46496973299809	10.0265151917062	7.38294086414578	4.93529154657603	8.0574700757581	1.56349762535562	1.87155308056018	4.2589865054291	4.52976540939361	1.21974277592068
ENSMUSG00000022560	229.927995219797	222.451323695034	288.876900922468	263.458035503205	279.374650064319	271.667833120216	180.922102394021	164.269351597953	218.756651687446	196.039359441044	201.054071797426	213.424487840784	259.292789754173	195.744337459779	0.408751346110486	0.00166872504039449	0.032225284506486	Slc52a2	15	76423032	76428808	+	5499	protein_coding	solute carrier protein 52, member 2 [Source:MGI Symbol;Acc:MGI:1289288]	-	216	207	312	295	303	278	185	193	223	170	207	187	2.6575176313809	2.5501904428904	3.29185024279544	2.98425645199868	3.214294875242	3.13553184898125	2.08228962080503	1.90490681794786	2.53381518867864	2.23878693360879	2.33698136585598
ENSMUSG00000004328	6.38688875610547	9.67179668239277	17.591862556176	14.2892493832247	3.68811419226824	16.6127811620276	1.9559146204759	0	3.9238861289228	4.61269081037751	0	1.14130742160847	11.3734487886991	1.93896649689745	2.58770979460272	0.00166909749501698	1	Hif3a	7	16765432	16796352	-	6710	protein_coding	hypoxia inducible factor 3, alpha subunit [Source:MGI Symbol;Acc:MGI:1859778]	bHLH	6	9	19	16	4	17	2	0	4	4	0	1	0.0604971413104967	0.0908669555203416	0.164285894196144	0.132646351093815	0.0347747709570087	0.157136306724803	0.0184484804846447	0	0.0372469969125631	0.0431702966526335	0
ENSMUSG00000027580	2745.297683666	2455.56171325194	2821.17922150885	3169.53412881653	3240.00831790765	3385.09846736845	2135.85876555968	2194.229991811	1567.59250850466	2805.66918541212	2772.02087396064	2095.44042607315	2969.44658875324	2261.80195855354	0.392982796607932	0.00167659129270292	0.0322756963275506	Helz2	2	180869408	180883820	-	11529	protein_coding	helicase with zinc finger 2, transcriptional coactivator [Source:MGI Symbol;Acc:MGI:2385169]	-	2579	2285	3047	3549	3514	3464	2184	2578	1598	2433	2854	1836	15.1344215329584	13.4270483656895	15.3338076184131	17.1242754641251	17.7802115948705	18.6352998177464	11.7250342635742	12.1364430053639	8.66041946731525	15.2826276364343	15.3684813113678
ENSMUSG00000108618	17.0317033496146	5.3732203791071	23.1471875739157	42.8677481496741	17.5185424132741	36.1572295879424	2.93387193071385	0	6.86680072561489	5.76586351297189	14.5691356374946	5.70653710804235	23.6826052422547	5.97370148580626	1.99705874626098	0.00167922950747942	1	Gm44816	7	43097497	43097973	+	477	TEC	predicted gene 44816 [Source:MGI Symbol;Acc:MGI:5753392]	-	16	5	25	48	19	37	3	0	7	5	15	5	2.26938263140983	0.710129596484384	3.04082078245648	5.59784286691507	2.32360353737371	4.8109792663173	0.389274541043918	0	0.916924237412519	0.75910034208378	1.95227729633306
ENSMUSG00000053846	934.614721310101	750.101564923351	1072.17772842378	1420.88723554441	693.365468146429	1083.73966521698	322.725912378523	680.05809288479	712.185332399487	570.820487784217	383.653905120691	765.817279899283	992.481063927507	572.543501744499	0.793945556425633	0.00168124353326949	0.0323146057521376	Lipg	18	75072393	75094334	-	4715	protein_coding	lipase, endothelial [Source:MGI Symbol;Acc:MGI:1341803]	-	878	698	1158	1591	752	1109	330	799	726	495	395	671	12.5985029471133	10.0290480861544	14.2493829253222	18.770953237018	9.30385536942678	14.58814224314	4.33196928283656	9.19740327246232	9.62074525873141	7.60275619389658	5.20096609103703
ENSMUSG00000045538	432.17947249647	425.559054025282	349.059588614649	406.350529335452	361.435190842288	347.891181981284	296.321065002098	204.27276882647	361.978495393128	298.671729971944	306.923124096553	252.228940175472	387.079169549238	286.732687244278	0.433128187509982	0.00172645792368535	0.0329772258455731	Ddx28	8	106736253	106738514	-	2262	protein_coding	DEAD box helicase 28 [Source:MGI Symbol;Acc:MGI:1919236]	-	406	396	377	455	392	356	303	240	369	259	316	221	12.1433791767266	11.8601060777302	9.66981008821161	11.1896535755684	10.109281116671	9.76129723960944	8.29092818915686	5.75862486326208	10.1926604648029	8.29191278179102	8.67287537373638
ENSMUSG00000055013	224.605587923042	288.00461232014	410.168163809787	328.652735814168	271.076393131716	329.323955976665	167.230700050689	257.894370643418	212.870822494062	207.571086466988	270.014647148233	141.52212027945	308.638574829253	209.517291180474	0.557528527046192	0.00173506904406055	0.0330620194241302	Agap1	1	89382528	89825339	+	17543	protein_coding	ArfGAP with GTPase domain, ankyrin repeat and PH domain 1 [Source:MGI Symbol;Acc:MGI:2653690]	-	211	268	443	368	294	337	171	303	217	180	278	124	0.813738220741553	1.03494416116032	1.46510603742042	1.16692192694	0.977620442024301	1.19145097695275	0.60331673581731	0.937430138453074	0.772875716731398	0.743046860529138	0.983806202502583
ENSMUSG00000008730	1672.30037264028	1400.26123079531	1622.15490518001	1940.6586818592	1714.97309940473	1805.90703455453	1133.45252256578	1131.16045737658	1397.88443342875	1595.99102039062	1393.78064265365	1450.60173286437	1692.70922073901	1350.47846821329	0.326847888723396	0.00177955781087611	0.0335451946076593	Hipk1	3	103647131	103698879	-	10914	protein_coding	homeodomain interacting protein kinase 1 [Source:MGI Symbol;Acc:MGI:1314873]	-	1571	1303	1752	2173	1860	1848	1159	1329	1425	1384	1435	1271	9.73864104791832	8.0880989230811	9.31363786396193	11.075762182857	9.94158893178583	10.5019067484402	6.57283321404748	6.60908257997707	8.15801889153151	9.18331967441387	8.16275149931892
ENSMUSG00000006800	694.041911496795	653.383598099423	651.824802081467	856.46188490703	641.731869454674	558.971224981164	443.014661537791	548.983066221138	631.74566675657	398.997755097655	575.96649553562	446.251201848912	676.069215170092	507.493141166281	0.41279785110175	0.00178303714016887	0.0335451946076593	Sulf2	2	165915009	165997583	-	5871	protein_coding	sulfatase 2 [Source:MGI Symbol;Acc:MGI:1919293]	-	652	608	704	959	696	572	453	645	644	346	593	391	7.51348871464595	7.01580463478164	6.95712447838628	9.08666196335885	6.91550606083221	6.04274250870783	4.77572430042075	5.96276620198912	6.85373926666854	4.26787391102679	6.27063087853366
ENSMUSG00000034135	1559.46533794909	1451.84414643474	1686.96703038698	1816.52082784244	1544.39781801233	1893.85705247115	1208.7552354541	1344.79572810759	1358.64557213952	1470.29519580783	1364.64237137866	1489.40618519905	1658.84203551612	1372.75671468113	0.273847649172084	0.00178413973978069	0.0335451946076593	Sik3	9	45924118	46135492	+	9318	protein_coding	SIK family kinase 3 [Source:MGI Symbol;Acc:MGI:2446296]	-	1465	1351	1822	2034	1675	1938	1236	1580	1385	1275	1405	1305	10.637046105269	9.82242295500412	11.3447482168201	12.143002590534	10.4862187293024	12.8997474206988	8.21010838206856	9.20310819395442	9.28711576404185	9.90911892137375	9.36099992733043
ENSMUSG00000108766	0	3.22393222746426	1.85177500591326	11.6100151238701	9.2202854806706	3.90888968518297	0	0	0	0	0	0	4.96914958718352	0	4.75030211223129	0.00178635703427169	1	Gm44760	7	127256234	127257406	-	1173	TEC	predicted gene 44760 [Source:MGI Symbol;Acc:MGI:5753336]	-	0	3	2	13	10	4	0	0	0	0	0	0	0	0.173264356789284	0.0989238883704513	0.616514343878594	0.497311835297374	0.211500851135536	0	0	0	0	0
ENSMUSG00000031299	2018.25684692933	1545.3381810312	1884.18106851674	1920.11788587082	1851.43332451866	1943.69539595723	1295.79343606528	1427.35597217496	1715.71920987149	1582.15294795949	1445.25825523946	1685.71106171571	1860.503783804	1525.33181383773	0.287118799586783	0.00178707876153723	0.0335451946076593	Pdha1	X	158905205	158921409	-	3734	protein_coding	pyruvate dehydrogenase E1 alpha 1 [Source:MGI Symbol;Acc:MGI:97532]	-	1896	1438	2035	2150	2008	1989	1325	1677	1749	1372	1488	1477	34.3534329269215	26.0897886233609	31.6198128487048	32.0303726575877	31.3701215819516	33.037761199904	21.9631531693699	24.3758010088064	29.2663988950514	26.6089268492061	24.7398602085716
ENSMUSG00000033039	356.601288882556	235.347052604891	317.579413514124	248.275708033529	367.889390678757	406.524527259029	217.106522872825	207.677314973578	208.946936365139	250.23847646298	283.612507076562	210.000565575959	322.036230162147	229.59705388784	0.488573723405124	0.0017889677958001	0.0335451946076593	Micall1	15	78993098	79021100	+	8341	protein_coding	microtubule associated monooxygenase, calponin and LIM domain containing -like 1 [Source:MGI Symbol;Acc:MGI:105870]	-	335	219	343	278	399	416	222	244	213	217	292	184	2.71727009341006	1.77873799394673	2.38586130698232	1.85406313993661	2.79049713869709	3.09332356213	1.64735796064839	1.58771245630546	1.59556783950793	1.88403590237981	2.17336842858534
ENSMUSG00000024350	276.765179431237	214.928815164284	256.470838318986	221.483365439983	177.951509776943	228.670046583204	152.56134039712	155.757986230183	154.01253056022	227.175022411093	112.667982263292	150.652579652318	229.378292452439	158.804573585704	0.532416193425904	0.0018208897904877	0.033988097882629	Dnajc18	18	35804156	35841467	-	5486	protein_coding	DnaJ heat shock protein family (Hsp40) member C18 [Source:MGI Symbol;Acc:MGI:1923844]	-	260	200	277	248	193	234	156	183	157	197	116	132	3.2064440615595	2.46979086783121	2.9294976971578	2.51474366487645	2.05224077800104	2.64551479317281	1.76003749836918	1.81048709415473	1.78812403561237	2.6005067460908	1.31271609382308
ENSMUSG00000048915	144.769478471724	142.927662084249	143.512562958277	209.873350316113	186.249766709546	122.152802661968	95.839816403319	101.285247876458	107.906868545377	130.308515393165	111.696706554125	105.000282787979	158.247603866979	108.672906260071	0.54576498993554	0.00182959976269601	0.0340988532404133	Efna5	17	62911179	63188312	-	4032	protein_coding	ephrin A5 [Source:MGI Symbol;Acc:MGI:107444]	-	136	133	155	235	202	125	98	119	110	113	115	92	2.28204659698689	2.23468907393679	2.23038774356071	3.24224018356711	2.92252108448342	1.92282442322346	1.50438390340931	1.60186748041001	1.70461361738361	2.02957676283025	1.7707038870759
ENSMUSG00000063317	218.218699166937	204.18237440607	254.619063313073	256.313410811593	183.483681065345	282.417279754469	151.583383086882	115.754569001666	198.156249510601	178.741768902129	107.81160371746	196.304876516657	233.205751419581	158.058741789233	0.56467428743089	0.00188900916581081	0.0349936811078256	Usp31	7	121241244	121306476	-	10304	protein_coding	ubiquitin specific peptidase 31 [Source:MGI Symbol;Acc:MGI:1923429]	-	205	190	275	287	199	289	155	136	202	155	111	172	1.34602812386215	1.24920507238703	1.54844590892364	1.54943689068526	1.12661111973952	1.73957089558408	0.931062797362903	0.716363096829322	1.22489626735312	1.08936498043409	0.668783812169686
ENSMUSG00000121083	626.979579557687	369.677562082568	382.391538721088	529.595305265765	551.373071744102	504.246769388603	117.354877228554	217.039816878124	266.82425676675	472.800808063695	148.605183502445	294.457314774985	494.043971126636	252.847042869092	0.967731007659731	0.00189240445744927	0.0350037824493855	ENSMUSG00000121083	15	89258111	89259912	+	1802	lncRNA	novel transcript, antisense to Tymp	-	589	344	413	593	598	516	120	255	272	410	153	258	22.1139656784991	12.9327131218568	13.2973304098715	18.3061809930918	19.3585669321135	17.7600856222397	4.12173043458266	7.68043009475167	9.43122072767162	16.4769427193479	5.27114870009927
ENSMUSG00000039270	701.493281712251	517.978444545924	631.455277016421	748.399436446393	549.529014647968	841.388504735634	386.29313754399	524.300106654607	571.906403290497	561.595106163462	463.298513272328	481.631731918774	665.040659850765	498.17083314061	0.417212148829547	0.00193214579867715	0.0356315536026319	Megf9	4	70345302	70453232	-	8226	protein_coding	multiple EGF-like-domains 9 [Source:MGI Symbol;Acc:MGI:1918264]	-	659	482	682	838	596	861	395	616	583	487	477	422	5.42004425377811	3.96957782752518	4.81021916860709	5.66699929547698	4.22653394786138	6.4917918522638	2.97208698641664	4.06435986276769	4.42826539728187	4.28733893425043	3.59996515890563
ENSMUSG00000047036	1481.75819141647	1566.83106254763	1806.40651826838	1658.44600654052	1712.20701376053	1685.70867673515	1235.16008283053	1115.83999971459	1201.69012698261	1614.44178363213	1316.07858592035	1531.63455979857	1651.89291154478	1335.80752314646	0.307647979688497	0.0019409155758072	0.0356871584925662	Zfp445	9	122673594	122695071	-	7409	protein_coding	zinc finger protein 445 [Source:MGI Symbol;Acc:MGI:2143340]	zf-C2H2	1392	1458	1951	1857	1857	1725	1263	1311	1225	1400	1355	1342	12.7111769227799	13.3316504237713	15.278012807748	13.9428050210381	14.6210686417424	14.4404140136632	10.5510791616705	9.6038030192762	10.3307127436915	13.684092548078	11.3539852101087
ENSMUSG00000085923	309.764104671115	202.033086254427	205.547025656372	186.653320068373	217.598737343826	141.697251087883	144.737681915216	81.709107530588	167.74613201145	132.614860798354	131.122220737451	160.924346446794	210.548920846999	136.475724906642	0.626853549246777	0.00195839189122003	0.0359536161554028	Gm12781	7	34352609	34362450	+	1762	lncRNA	predicted gene 12781 [Source:MGI Symbol;Acc:MGI:3649569]	-	291	188	222	209	236	145	148	96	171	115	135	141	11.1736022601484	7.2283293637155	7.30998129256406	6.59839373972953	7.81327132472767	5.10401848260324	5.19886975019607	2.95709635430166	6.063787844416	4.72649821396206	4.75659842971501
ENSMUSG00000005514	23634.6818419683	27717.220003586	27721.0718385215	29471.5768529009	26754.5023792619	30121.9039140199	15078.1458092487	16912.0829857582	23271.5876591089	26196.6242848365	17625.740294241	26868.6593195066	27570.1594717098	20992.1400587833	0.393320987905028	0.00197902998414124	0.036224212019706	Por	5	135698887	135764180	+	4021	protein_coding	cytochrome p450 oxidoreductase [Source:MGI Symbol;Acc:MGI:97744]	-	22203	25792	29940	33000	29017	30824	15418	19870	23723	22717	18147	23542	373.580078394628	434.547179186995	432.003154500456	456.538819987307	420.964277458803	475.450231417948	237.326969643523	268.203191149264	368.628855200676	409.132958901911	280.181457316708
ENSMUSG00000026623	5247.8935946	4993.87102034214	5355.33331710114	6247.08121472855	6407.176380518	6952.9375275192	4443.83801772124	3635.20414857439	4555.63179567937	5127.00583573461	4370.74069124838	5730.50456389613	5867.3821758015	4643.82084214235	0.337729000301762	0.00199334402397101	0.0363323053871061	Lpgat1	1	191449946	191516367	+	7610	protein_coding	lysophosphatidylglycerol acyltransferase 1 [Source:MGI Symbol;Acc:MGI:2446186]	-	4930	4647	5784	6995	6949	7115	4544	4271	4644	4446	4500	5021	43.8296886485682	41.3689029179926	44.0973836138365	51.1329568478751	53.267763386383	57.9883014450662	36.9578579245817	30.4610634697901	38.1295206988054	42.3089613054255	36.7110224842656
ENSMUSG00000071379	565.239654915334	449.201223693353	507.386351620233	480.47601051093	417.678932274378	537.472331712658	397.050667956607	388.96939730707	430.646502649277	357.483537804257	407.935797849849	375.490141709187	492.909084121148	392.929340879374	0.325841068353576	0.00199452861345984	0.0363323053871061	Hpcal1	12	17740857	17841934	+	1695	protein_coding	hippocalcin-like 1 [Source:MGI Symbol;Acc:MGI:1855689]	-	531	418	548	538	453	550	406	457	439	310	420	329	21.19487900302	16.7067728288655	18.7577201003185	17.6567357861965	15.5903299475003	20.1253354144677	14.8255036711204	14.6334471838726	16.1826115538891	13.2446215438264	15.3832540234952
ENSMUSG00000043998	662.107467716267	630.816072507173	794.411477536788	860.927275339288	941.391147576468	807.185719990283	599.487831175863	583.028527692217	606.240406918572	724.19245722927	585.679252627283	608.316855717315	782.806526777711	617.82422189342	0.343123228279799	0.00207471964516522	0.0373967422772753	Mgat2	12	69230931	69233544	+	2614	protein_coding	mannoside acetylglucosaminyltransferase 2 [Source:MGI Symbol;Acc:MGI:2384966]	-	622	587	858	964	1021	826	613	685	618	628	603	533	16.0987043430448	15.213127535274	19.0436810765545	20.514894875413	22.7848915548087	19.5985799219126	14.5146984284344	14.2228010502402	14.7719110421842	17.3980919719395	14.3212310895582
ENSMUSG00000038658	620.592690801582	527.650241228317	578.679689347893	707.317844469622	597.474499147455	651.80735500426	486.044783188261	596.646712280648	420.83678732697	446.277835904024	459.413410435663	499.89265066451	613.920386666521	484.852029966679	0.339906974555729	0.00207906896104405	0.0373967422772753	Ric1	19	29499682	29584229	+	10727	protein_coding	RAB6A GEF complex partner 1 [Source:MGI Symbol;Acc:MGI:1924893]	-	583	491	625	792	648	667	497	701	429	387	473	438	3.67702343007942	3.10091027134927	3.3804220966527	4.10718954824789	3.52389964814837	3.85653869723089	2.86768360743111	3.54682600677802	2.49880751474165	2.61264405795327	2.73748333411617
ENSMUSG00000051000	156.478774524584	109.613695733785	148.142000473061	118.779385498055	107.877340123846	167.105034041572	88.9941152316533	31.4920518607475	83.3825802396094	70.3435348582571	104.897776589961	99.2937456799369	134.66603839915	79.7339674100276	0.759085022702773	0.00208049592137057	0.0373967422772753	Fhip1a	3	85567368	85724598	-	5290	protein_coding	FHF complex subunit HOOK interacting protein 1A [Source:MGI Symbol;Acc:MGI:2444746]	-	147	102	160	133	117	171	91	37	85	61	108	87	1.88004301431741	1.30626258553313	1.75482375891931	1.39860093462492	1.29019987879106	2.00489013342718	1.06472841859441	0.379617477399068	1.0039614692382	0.835067775183809	1.2674671354492
ENSMUSG00000011305	2242.86243485237	1743.07269098234	1982.32514383014	3276.70349919071	1674.40384328978	2501.6893985171	471.375423534691	545.578520074031	1611.73622745504	1090.90137665428	266.129544311568	1481.41703324779	2236.84283511041	911.189687546234	1.2958573342865	0.0020826715288761	0.0373967422772753	Plin5	17	56418601	56424596	-	2087	protein_coding	perilipin 5 [Source:MGI Symbol;Acc:MGI:1914218]	-	2107	1622	2141	3669	1816	2560	482	641	1643	946	274	1298	68.3043259010991	52.6519413533674	59.5200672703241	97.7964539744583	50.7598350537488	76.0795011808671	14.2947878660871	16.6700048943618	49.1891033627766	32.8258702982817	8.15073432602264
ENSMUSG00000022139	801.554538891237	746.877632695886	774.041952471742	932.373522255411	741.310952645916	689.919029434794	573.082983799438	537.067154706261	684.718129497028	660.767958586579	673.094066452251	652.827845160045	781.012938065831	630.259689700267	0.310565882505719	0.00214148185462279	0.0380650174706123	Mbnl2	14	120513081	120669109	+	11993	protein_coding	muscleblind like splicing factor 2 [Source:MGI Symbol;Acc:MGI:2145597]	-	753	695	836	1044	804	706	586	631	698	573	693	572	4.24789003445976	3.9259336809559	4.04433981509793	4.84250982102286	3.91070468918762	3.65112757145169	3.02428634096773	2.85562826825404	3.63648148502756	3.45998606851798	3.58735226300427
ENSMUSG00000020593	7798.39117120478	7829.85673643486	11947.6523381523	13403.3159214648	5503.58840341228	13820.8567043857	2024.37163219255	4281.2167799881	5674.92031395459	5620.563752445	2083.38639616173	8192.3046723056	10050.6102125091	4646.12725784126	1.11323626512958	0.00214158337992128	0.0380650174706123	Lpin1	12	16585670	16696967	-	9930	protein_coding	lipin 1 [Source:MGI Symbol;Acc:MGI:1891340]	-	7326	7286	12904	15008	5969	14143	2070	5030	5785	4874	2145	7178	49.9141625391925	49.7079561424562	75.3953047602917	84.0758792404278	35.0654274577644	88.3369566620442	12.9025105431807	27.4927943465572	36.4005467171168	35.5454353899274	13.4105525337537
ENSMUSG00000064289	217.154217707586	216.003459240105	319.431188520037	258.099566984496	335.61839149641	311.733952393342	167.230700050689	193.20799384837	239.35705386429	219.102813492932	173.858351940769	202.011413624699	276.340129390329	199.128054470292	0.474982162828827	0.00219595365578054	0.0386954129129075	Tank	2	61408929	61484515	+	6096	protein_coding	TRAF family member-associated Nf-kappa B activator [Source:MGI Symbol;Acc:MGI:107676]	-	204	201	345	289	364	319	171	227	244	190	179	177	2.26407772614448	2.23376296988626	3.28354771696162	2.6372465302823	3.4832386637236	3.24560650360289	1.73621809324854	2.02106855796057	2.50091343606975	2.25712808408967	1.82295814077872
ENSMUSG00000021573	563.110691996633	586.755665398495	594.419776898156	501.909884585767	675.846925733155	641.057908370007	427.367344573984	296.195514798382	412.008043536893	524.693579680442	420.562382069011	571.795018225844	593.850142163702	442.103647147426	0.428058814649486	0.00222676022989237	0.039050214156679	Tppp	13	74157526	74183872	+	5102	protein_coding	tubulin polymerization promoting protein [Source:MGI Symbol;Acc:MGI:1920198]	-	529	546	642	562	733	656	437	348	420	455	433	501	7.01489768144277	7.25000283683206	7.30068766362037	6.12764654671939	8.38089360633478	7.97468477746871	5.30144314687466	3.7020214992186	5.14354599661825	6.45830430200522	5.26885280363161
ENSMUSG00000048732	31.9344437805274	18.2689492889641	36.1096126153085	66.0877783974142	47.9454844994871	50.8155659073786	6.84570117166564	23.8318230297548	19.619430644614	28.8293175648595	16.5116870558272	13.6956890593016	41.86030574818	18.2222747543371	1.20441861663199	0.00222880639340758	0.039050214156679	Klhl11	11	100353440	100363567	-	2393	protein_coding	kelch-like 11 [Source:MGI Symbol;Acc:MGI:2388648]	-	30	17	39	74	52	52	7	28	20	25	17	12	0.848173460496099	0.481273790045288	0.945564379708114	1.72023138247291	1.26761524052648	1.34775448347923	0.181054142992846	0.635061053662709	0.52220507581132	0.756562605879572	0.441036818385982
ENSMUSG00000048307	1197.54164176978	1352.97689145917	1515.67784234	1528.05660591859	1486.3100194841	1431.63084719826	1009.25194416556	1030.7263460369	1319.40671085029	1255.80507312528	1057.71924728211	1264.56862314218	1418.69897469498	1156.24632410039	0.296195811153343	0.002238535342037	0.0391648020952969	Ankrd46	15	36477814	36496966	-	5221	protein_coding	ankyrin repeat domain 46 [Source:MGI Symbol;Acc:MGI:1916089]	-	1125	1259	1637	1711	1612	1465	1032	1211	1345	1089	1089	1108	14.5782351869888	16.3364626800046	18.1913186528279	18.2303145242935	18.0110134817039	17.4033987803872	12.2343001131611	12.5889815430364	16.0961637993697	15.1050354336888	12.9491961745783
ENSMUSG00000027035	872.874796667748	778.042310894708	941.627590506892	1177.07691794313	847.344235673628	1119.89689480492	524.18511828754	712.401281282314	720.033104657333	676.9123764229	745.939744639724	939.296007983771	956.143791081838	719.794605545597	0.410525690447479	0.00225329739967428	0.0393669966753906	Cers6	2	68691785	68944626	+	8875	protein_coding	ceramide synthase 6 [Source:MGI Symbol;Acc:MGI:2442564]	-	820	724	1017	1318	919	1146	536	837	734	587	768	823	6.2510304397862	5.52657658336201	6.64847111642448	8.26123342870744	6.04051485517421	8.00878059565502	3.73808828010443	5.11867131542954	5.16751195419551	4.78979913652093	5.37231515965798
ENSMUSG00000048154	1682.94518723379	2028.92801515084	2082.32099414946	2102.30581550693	1944.55820787343	2044.34930535069	1523.65748935072	2058.04814592669	1448.89495310474	1634.04571957623	1528.78796622777	1493.97141488549	1980.90125421086	1614.56761484527	0.294670281994377	0.00226797534068475	0.0395118558598081	Kmt2d	15	98729550	98769085	-	19931	protein_coding	lysine (K)-specific methyltransferase 2D [Source:MGI Symbol;Acc:MGI:2682319]	-	1581	1888	2249	2354	2109	2092	1558	2418	1477	1417	1574	1309	5.36671958727458	6.41739673356601	6.54680735188036	6.57014893660057	6.17268759687551	6.51002612281258	4.83828547772221	6.58456901886713	4.63025807650684	5.14859016725208	4.90280096175897
ENSMUSG00000062078	1495.59645038803	1280.97573837913	1320.31557921615	1541.45277721536	1318.5008237359	1578.21421039262	1236.13804014077	980.509290367056	1186.97555399915	1220.05671934485	1073.25965862877	1313.64484227135	1422.5092632212	1168.43068412532	0.284727989703008	0.00226842590653078	0.0395118558598081	Qk	17	10421530	10538783	-	14242	protein_coding	quaking, KH domain containing RNA binding [Source:MGI Symbol;Acc:MGI:97837]	-	1405	1192	1426	1726	1430	1615	1264	1152	1210	1058	1105	1151	6.67438824792601	5.67010709854623	5.80921886776707	6.7416725588882	5.85722440253801	7.03317923899213	5.4932481505998	4.39017310176621	5.30845549488819	5.37975190616561	4.81681448643783
ENSMUSG00000021892	1031.48253411103	1054.22583838081	1067.54829090899	1113.66837380507	1205.09131232365	1086.67133248086	958.39816403319	827.304713747204	862.273976830784	949.061134235173	965.448054911309	986.089612269718	1093.1146136684	924.762609337896	0.242445576864836	0.00227445709924152	0.0395118558598081	Sh3bp5	14	31081837	31158035	-	3194	protein_coding	SH3-domain binding protein 5 (BTK-associated) [Source:MGI Symbol;Acc:MGI:1344391]	-	969	981	1153	1247	1307	1112	980	972	879	823	994	864	20.5255587471006	20.8075086405832	20.9441910426575	21.7184779812119	23.8708279625734	21.5933495773924	18.9908450173648	16.5170125970038	17.1952207279288	18.6600363426532	19.3205771807298
ENSMUSG00000030533	437.501879793225	470.694105209782	474.980289016751	387.59588951997	450.871960004792	353.754516509058	266.004388384722	247.680732202095	355.111694667513	380.546991856145	361.314563809866	334.403074531282	429.233106675596	324.17690757527	0.406600133528886	0.00229530029822465	0.0398176246649648	Unc45a	7	79975040	79997741	-	9263	protein_coding	unc-45 myosin chaperone A [Source:MGI Symbol;Acc:MGI:2142246]	-	411	438	513	434	489	362	272	291	362	330	372	293	3.00190041522727	3.20337981377732	3.21317882451855	2.60636905480366	3.07952690047574	2.4238572928392	1.81748303476923	1.70506708915549	2.44180342331194	2.57994137638795	2.493215967257
ENSMUSG00000058997	6792.45619211817	7399.99910610629	7887.63563768752	7499.17669193361	7166.92790412526	7595.9498807318	5458.95770574823	5366.41586437872	5881.90530725527	7622.47156414884	6115.15186491107	6486.05007700094	7390.35756878378	6155.15873057384	0.264118236147575	0.00231047890025847	0.0399132708455375	Vwa8	14	79086492	79439750	+	12639	protein_coding	von Willebrand factor A domain containing 8 [Source:MGI Symbol;Acc:MGI:1919008]	-	6381	6886	8519	8397	7773	7773	5582	6305	5996	6610	6296	5683	34.1571914430506	36.9096810738781	39.1061534020768	36.9580700708336	35.8758963741918	38.1439877348516	27.3357027936575	27.0752530275358	29.6416723297463	37.8735755293915	30.9257776624157
ENSMUSG00000009112	1082.57764415988	984.37397345242	1094.39902849474	1085.08987503862	1178.3524844297	1340.74916201776	752.049171572983	811.133119548442	860.312033766323	1155.47904799957	952.821470692147	809.186961920405	1127.59036126552	890.163634249978	0.341968020530079	0.00233067959338167	0.0399925010071903	Bcl2l13	6	120813173	120869803	+	9089	protein_coding	BCL2-like 13 (apoptosis facilitator) [Source:MGI Symbol;Acc:MGI:2136959]	-	1017	916	1182	1215	1278	1372	769	953	877	1002	981	709	7.57026308546451	6.82755737377302	7.54519673733048	7.43631913745316	8.20241157908771	9.36242061228083	5.2367683362285	5.69084745158341	6.02888891301167	7.98360754539138	6.70072088028903
ENSMUSG00000048720	207.573884573428	145.076950235892	177.770400567673	219.69720926708	226.819022824497	253.100607115597	157.45112694831	103.838657486789	159.898359753604	159.137832958024	149.576459211611	130.109046063366	205.006345764028	143.335247070284	0.518774579912756	0.0023351367163993	0.0399925010071903	Tbc1d12	19	38825023	38908367	+	4209	protein_coding	TBC1D12: TBC1 domain family, member 12 [Source:MGI Symbol;Acc:MGI:2384803]	-	195	135	192	246	246	259	161	122	163	138	154	114	3.13445333601487	2.17290545809512	2.64661943968158	3.25127740996252	3.4094395003502	3.81655019487609	2.3675549955294	1.57318954597812	2.41970527044295	2.37436631589484	2.27148785355245
ENSMUSG00000022299	903.744758988924	815.654853548457	959.219453063068	1057.40445435863	875.00509211564	1080.80799795309	561.347496076583	556.643295052131	902.493809652243	665.380649396956	627.444108121434	942.719930248596	948.639435004634	709.338214757991	0.420485568674138	0.00233814564913669	0.0399925010071903	Slc25a32	15	38954626	38976111	-	6081	protein_coding	solute carrier family 25, member 32 [Source:MGI Symbol;Acc:MGI:1917156]	-	849	759	1036	1184	949	1106	574	654	920	577	646	826	9.44580139358178	8.455762193718	9.88448273447186	10.8311493458515	9.10370164250659	11.280549712649	5.84238287500644	5.83717739284728	9.45293378312096	6.87144969746347	6.59517218271844
ENSMUSG00000033902	197.99355143927	182.689492889641	208.324688165242	155.395587042569	180.717595421144	188.603927310078	128.112407641171	52.7704652801714	140.27892910899	129.15534269057	89.3573652433002	165.489576133228	185.620807044657	117.527347682905	0.663693424727085	0.00234119917148427	0.0399925010071903	Mapkbp1	2	119803180	119857889	+	7602	protein_coding	mitogen-activated protein kinase binding protein 1 [Source:MGI Symbol;Acc:MGI:1347004]	-	186	170	225	174	196	193	131	62	143	112	92	145	1.65535521757385	1.5149805045756	1.71721173626489	1.27326625194087	1.50402485437449	1.57463385252969	1.06658766316808	0.442653569961483	1.17533579806339	1.06693440345919	0.751326290206789
ENSMUSG00000030852	604.625468911318	462.09695260321	508.312239123189	626.940816688983	543.074814811498	625.422349629275	400.962497197559	304.706880166151	601.335549257418	413.989000231382	312.750778351551	412.011979200658	561.745440294579	407.626114067453	0.463542537963487	0.00235499462231486	0.0401607364256662	Tacc2	7	130179168	130366515	+	15793	protein_coding	transforming, acidic coiled-coil containing protein 2 [Source:MGI Symbol;Acc:MGI:1928899]	-	568	430	549	702	589	640	410	358	613	359	322	361	2.4332673202671	1.84454735053393	2.0168653473418	2.47269369783815	2.17559206655765	2.51342238593791	1.60683893691211	1.23032128679641	2.42521156700218	1.64618020489398	1.2657847529622
ENSMUSG00000039100	3540.46533380113	3703.22348528061	3718.36421187382	3930.43665847324	4074.44415390834	4154.1725129282	3065.89616759597	2902.37559040943	3369.63721321245	3642.87256749564	2957.5345344114	3603.10753001794	3853.51772604422	3256.90393385714	0.243189499704007	0.0023589627895359	0.0401607364256662	Marchf6	15	31456037	31531199	-	9174	protein_coding	membrane associated ring-CH-type finger 6 [Source:MGI Symbol;Acc:MGI:2442773]	-	3326	3446	4016	4401	4419	4251	3135	3410	3435	3159	3045	3157	24.5284232852147	25.4473477912456	25.3982716247599	26.686429901826	28.0990781906484	28.7397184603721	21.1510501527639	20.1741752928489	23.3949325481831	24.9366696482788	20.6061655636829
ENSMUSG00000031549	2636.72057481221	3141.18463362601	3381.34116079761	3211.50879887975	2966.16583913173	3211.15287637781	2196.49211879443	2031.6629132866	2437.71425759329	2820.66043054585	2460.24137131826	3054.13866022427	3091.34564727085	2500.15162529378	0.30684843128637	0.00236896109828272	0.0402059260183503	Ido2	8	25021908	25066349	-	3636	protein_coding	indoleamine 2,3-dioxygenase 2 [Source:MGI Symbol;Acc:MGI:2142489]	-	2477	2923	3652	3596	3217	3286	2246	2387	2485	2446	2533	2676	46.0901641760696	54.4616668107744	58.2741690464502	55.0165880940393	51.6123927469717	56.052349950715	38.2330551293613	35.6310558018749	42.7027958587043	48.7169555183451	43.2493852731712
ENSMUSG00000056724	225.670069382393	258.989222272962	260.174388330813	367.948171618036	333.774334400276	317.597286921116	253.290943351629	257.894370643418	202.080135639524	197.192532143639	187.456211869097	151.793887073927	294.025578820933	208.284680120206	0.496117150439402	0.00237042638961872	0.0402059260183503	Nbeal2	9	110453857	110483229	-	9554	protein_coding	neurobeachin-like 2 [Source:MGI Symbol;Acc:MGI:2448554]	-	212	241	281	412	362	325	259	303	206	171	193	133	1.50126288216119	1.70890450121531	1.70643707439028	2.39888718420212	2.21029448791064	2.10983389088719	1.67790609951115	1.72130384329938	1.34721148085512	1.29615946415633	1.25412462617904
ENSMUSG00000063558	1476.43578411972	1121.92841515756	1547.15801744053	1482.50962350956	1424.53410676361	1461.92474225843	913.412127762244	1003.48997686003	966.256959247238	1509.50306769604	1097.54155135793	1135.60088450043	1419.08178154157	1104.30076123732	0.362878453327002	0.00237333466563296	0.0402059260183503	Aox1	1	58069090	58145572	+	8690	protein_coding	aldehyde oxidase 1 [Source:MGI Symbol;Acc:MGI:88035]	-	1387	1044	1671	1660	1545	1496	934	1179	985	1309	1130	995	10.798484461724	8.13891869951819	11.1564460235224	10.6263999301896	10.3713553444408	10.6773125885917	6.6524286527351	7.36366759233981	7.08223357433972	10.9085601816966	8.07285757956643
ENSMUSG00000041417	2152.38151080754	2820.94069903123	3047.09577223027	3173.99951924878	2017.39846317073	3299.10289429442	1784.77209118426	1812.06968679815	1993.33415349278	2629.23376191518	1665.73784122022	2477.77841231199	2751.81980979716	2060.48765782043	0.417880901448882	0.00242941241943305	0.0408740319664064	Pik3r1	13	101817071	101904725	-	10079	protein_coding	phosphoinositide-3-kinase regulatory subunit 1 [Source:MGI Symbol;Acc:MGI:97583]	-	2022	2625	3291	3554	2188	3376	1825	2129	2032	2280	1715	2171	13.5728118594292	17.6440325627147	18.9443466615564	19.6154295707261	12.663585284004	20.7747177928757	11.2072368238336	11.4645856480669	12.5967946657323	16.3819261441936	10.5636816063217
ENSMUSG00000001436	393.858139959838	464.246240754853	361.096126153085	389.382045692873	345.760705525148	393.820635782184	251.335028731153	251.93641488598	381.597926037742	273.301930514868	213.680656016588	352.663993277017	391.360648977997	287.419324910558	0.445990920554988	0.00243833711796807	0.0409680663240545	Slc19a1	10	76868075	76896836	+	4644	protein_coding	solute carrier family 19 (folate transporter), member 1 [Source:MGI Symbol;Acc:MGI:103182]	-	370	432	390	436	375	403	257	296	389	237	220	309	5.39033350314277	6.30198730275444	4.87238492816864	5.22266444479463	4.71048758724015	5.38223895606909	3.42526390410801	3.45939096544542	5.23372840607251	3.69575945616836	2.94102755494102
ENSMUSG00000110755	73.4492206952129	79.523661610785	74.996887739487	61.6223879651565	83.9045978741025	20.5216708472106	31.2946339276144	29.7897787871936	62.7821780627647	9.22538162075503	12.626584219162	17.1196113241271	65.6697377886591	27.1396946569361	1.2686641837254	0.00244639984458269	0.0410473809988587	BC049987	9	44581745	44583563	-	1819	lncRNA	cDNA sequence BC049987 [Source:MGI Symbol;Acc:MGI:3039606]	-	69	74	81	69	91	21	32	35	64	8	13	15	2.56638917494474	2.7560367780875	2.58357762664697	2.11015441495757	2.91833739610487	0.71603909648456	1.08885589050657	1.04432456117019	2.19837140656007	0.31849663610684	0.443689628534408
ENSMUSG00000028894	1132.60827274937	1032.73295686438	1229.5786039264	992.209754047665	1123.03077154568	1222.50524904097	877.22770728344	893.693363615807	820.092200944864	1014.79197828305	963.505503492976	1014.62229780993	1122.11093469575	930.655508571678	0.270708560970852	0.00247215499274691	0.0412947368701606	Inpp5b	4	124635643	124695304	+	4657	protein_coding	inositol polyphosphate-5-phosphatase B [Source:MGI Symbol;Acc:MGI:103257]	-	1064	961	1328	1111	1218	1251	897	1050	836	880	992	889	15.4575803649636	13.9798701584562	16.5447813577131	13.2710616356786	15.2569547231061	16.6610056622215	11.9217313436347	12.237232403491	11.2164088469421	13.6843444102679	13.2243415673619
ENSMUSG00000026922	4158.92906168401	4062.15460660497	4160.93843828709	4467.17658843062	3907.5569867082	4999.46990734901	3192.05266061666	3167.07905334706	2924.27613757971	4733.77394414992	3081.85782518469	3390.82434959876	4292.70426484398	3414.9773284128	0.330336580609366	0.00248921343416649	0.0414823872434639	Agpat2	2	26483069	26494429	-	2130	protein_coding	1-acylglycerol-3-phosphate O-acyltransferase 2 (lysophosphatidic acid acyltransferase, beta) [Source:MGI Symbol;Acc:MGI:1914762]	-	3907	3780	4494	5002	4238	5116	3264	3721	2981	4105	3173	2971	124.099471180105	120.225940867336	122.411624046262	130.635715763766	116.066838756929	148.970773441576	94.8470160623513	94.8156907841165	87.445238053229	139.566478246866	92.4824001822633
ENSMUSG00000028458	241.637291272657	209.555594785177	162.956200520367	246.489551860626	224.974965728363	283.394502175765	146.693596535692	214.486407267794	115.754640803222	141.840242419109	138.892426410782	184.891802300572	228.168017723826	157.093185956195	0.537158912878057	0.00250317512057027	0.0416585322911166	Tesk1	4	43441939	43448064	+	4434	protein_coding	testis specific protein kinase 1 [Source:MGI Symbol;Acc:MGI:1201675]	-	227	195	176	276	244	290	150	252	118	123	143	162	3.46366827281271	2.97937322584551	2.30295883021007	3.46267106974094	3.21011761398584	4.05650905112626	2.09386508883569	3.08464364292597	1.66280036171793	2.00889382816407	2.00220698632047
ENSMUSG00000035284	672.752282309776	675.951123691673	610.159864448419	799.304887374131	713.650096203904	896.112960328195	555.479752215155	354.072799299215	443.399132568276	669.993340207334	691.548304926411	459.946890908213	727.988535726016	529.073370020767	0.461442591877587	0.00251942854571268	0.0418722887664995	Vps13c	9	67747678	67902920	+	16299	protein_coding	vacuolar protein sorting 13C [Source:MGI Symbol;Acc:MGI:2444207]	-	632	629	659	895	774	917	568	416	452	581	712	403	2.62338627214604	2.61442190590833	2.34581441123926	3.05463920016699	2.77017246389445	3.4894623445653	2.15695210447011	1.38526390354488	1.73273148469309	2.58144415613317	2.7119873386499
ENSMUSG00000021254	220.347662085639	204.18237440607	182.399838082456	233.986458650304	177.029481228876	219.875044791542	146.693596535692	94.4761555822424	166.765160479219	191.426668630667	135.978599283283	133.532968328191	206.303476540814	144.812191473216	0.513841340199779	0.0025405122657121	0.0420544558851453	Gpatch2l	12	86288632	86338558	+	8316	protein_coding	G patch domain containing 2 like [Source:MGI Symbol;Acc:MGI:1917623]	-	207	190	197	262	192	225	150	111	170	166	140	117	1.6840771678299	1.54783658800817	1.37442466621767	1.75260745964066	1.34683239896986	1.6781013148132	1.11642590234457	0.724450380750746	1.27728623671719	1.44557679862621	1.04515855258235
ENSMUSG00000116840	21.2896291870182	31.1646781988212	19.4436375620892	22.3269521612886	18.4405709613412	20.5216708472106	9.77957310237949	11.0647749781005	13.7336014512298	5.76586351297189	1.94255141833261	7.98915195125929	22.1978564862948	8.37925273571225	1.39558461574412	0.0025413956085381	1	Gm21691	16	34819671	34843575	-	2874	lncRNA	predicted gene, 21691 [Source:MGI Symbol;Acc:MGI:5435046]	-	20	29	21	25	20	21	10	13	14	5	2	7	0.470813985378605	0.683592394444571	0.423937394263975	0.483894950330276	0.405947656787627	0.45319245529068	0.215360654230977	0.245502961507024	0.304365247909375	0.125988470137078	0.0432027961192703
ENSMUSG00000074582	1648.88178053456	1687.19119903963	1650.85741777167	1932.62097908114	1778.59306922136	1844.01870898506	1327.0880699929	1200.10251685551	1447.91398157251	1717.07415416303	1376.29767988866	1605.81954220312	1757.0271924389	1445.71599077929	0.282472519965772	0.00254400242187752	0.0420544558851453	Arfgef2	2	166647508	166739972	+	8770	protein_coding	ADP-ribosylation factor guanine nucleotide-exchange factor 2 (brefeldin A-inhibited) [Source:MGI Symbol;Acc:MGI:2139354]	-	1549	1570	1783	2164	1929	1887	1357	1410	1476	1489	1417	1407	11.949726004972	12.1279122807569	11.795624666327	13.726363898779	12.8309685750122	13.3451188838884	9.57708583799986	8.72608956261181	10.5157573415664	12.2954001200919	10.0308764354784
ENSMUSG00000004565	741.943577167586	755.474785302458	814.781002601834	796.625653114777	812.30715084708	845.297394420817	602.421703106576	535.364881632707	586.620976273958	773.778883440828	705.146164854739	665.382226797738	794.404927242425	644.785806017758	0.302881598656655	0.00255133634442142	0.0420544558851453	Pnpla6	8	3565384	3594267	+	9698	protein_coding	patatin-like phospholipase domain containing 6 [Source:MGI Symbol;Acc:MGI:1354723]	-	697	703	880	892	881	865	616	629	598	671	726	583	4.8624676098306	4.91087786592503	5.26465222373245	5.11658884646854	5.29932476438612	5.53202415705341	3.93144005444478	3.52021032609798	3.85276744873717	5.0105788655337	4.64753923334524
ENSMUSG00000025199	2573.91616871051	2861.77717391244	3024.87447215931	3425.84753962812	2889.63746964217	3470.11681802118	2213.11739306848	2243.59591094406	2597.61261734689	2813.74139433028	2370.88400607496	2755.11611576285	3041.02827367895	2499.01123958792	0.283760708244672	0.00255617383398155	0.0420544558851453	Chuk	19	44061774	44095919	-	5087	protein_coding	conserved helix-loop-helix ubiquitous kinase [Source:MGI Symbol;Acc:MGI:99484]	-	2418	2663	3267	3836	3134	3551	2263	2636	2648	2440	2441	2414	32.1588627348051	35.4646286638052	37.2611789559906	41.9483329167524	35.9388405210767	43.2951326791048	27.5344205887162	28.124435559336	32.5244555190767	34.7356676290336	29.7902855111261
ENSMUSG00000028088	23190.793073419	24711.4405235135	29440.4449315119	33340.391123409	22317.7010059632	33162.042866671	8916.03679743938	12961.9583185763	17144.4394687959	17561.6670878098	11868.0178903031	27529.4763166179	27693.8022540813	15996.9326465904	0.791794633488481	0.00255778200180781	0.0420544558851453	Fmo5	3	97536120	97562598	+	5675	protein_coding	flavin containing monooxygenase 5 [Source:MGI Symbol;Acc:MGI:1310004]	-	21786	22995	31797	37332	24205	33935	9117	15229	17477	15229	12219	24121	259.727393103146	274.507071152161	325.079419955804	365.942825058591	248.808967009101	370.878901435798	99.4349854662354	145.648383092806	192.422038917366	194.335920890794	133.671377238382
ENSMUSG00000041528	1514.75711665635	1551.78604548613	1661.96806780715	1595.03746240246	1680.85804312625	1580.16865523521	1218.53480855648	1416.29119719686	1457.72369689482	1331.91447149651	1486.05183502445	1303.37307547687	1597.42923178559	1368.98151410767	0.222499015453172	0.00256984253117896	0.042139927861068	Rnf123	9	107928733	107960545	-	6754	protein_coding	ring finger protein 123 [Source:MGI Symbol;Acc:MGI:2148796]	-	1423	1444	1795	1786	1823	1617	1246	1664	1486	1155	1530	1142	14.2544336513981	14.4841203584035	15.4195816775302	14.7101886871608	15.7453536430466	14.8490648461529	11.4185277501295	13.371878213727	13.7471143409454	12.384215189989	14.0636807189501
ENSMUSG00000102095	2248.18484214913	2538.30930709019	2796.18025892902	2322.89610286046	2399.11828207049	2291.58657793851	1151.05575415007	912.4183674249	1110.45977448515	2210.63207087342	1112.11068699542	2222.12554987169	2432.71256183963	1453.13370063344	0.743828886640629	0.00258885589188183	0.0422261992883036	C730036E19Rik	1	151013785	151018096	+	1102	lncRNA	RIKEN cDNA C730036E19 gene [Source:MGI Symbol;Acc:MGI:3028040]	-	2112	2362	3020	2601	2602	2345	1177	1072	1132	1917	1145	1947	129.663709622585	145.205907983566	158.999055170957	131.297544135579	137.737597899777	131.980993354299	66.1070829714899	52.7974974305397	64.1827947796491	125.976077078854	64.5048717212188
ENSMUSG00000044147	810.070390566044	612.547123218209	615.715189466158	611.758489219307	707.195896367435	815.980721781944	576.99481304039	548.131929684361	559.153773371498	544.297515624547	471.068718945659	616.306007668574	695.544635103183	552.658793055838	0.331840080568607	0.00260384732309703	0.0424143936634983	Arf6	12	69418924	69420557	+	1534	protein_coding	ADP-ribosylation factor 6 [Source:MGI Symbol;Acc:MGI:99435]	-	761	570	665	685	767	835	590	644	570	472	485	540	33.5633591531076	25.1730294639034	25.1515920808112	24.8406557957161	29.167339140191	33.7606854871181	23.8056353946088	22.7856097343819	23.2168495911799	22.2825146568593	19.6284046553747
ENSMUSG00000004562	535.434174053509	553.441699048031	449.981326436922	503.69604075867	459.170216937396	404.570082416437	371.623777890421	280.023920599619	384.540840634434	440.511972391053	394.337937921521	375.490141709187	484.382256608494	374.421431857706	0.372704136562042	0.00264401323120068	0.0428221294613555	Arhgef40	14	52222176	52243708	+	10366	protein_coding	Rho guanine nucleotide exchange factor (GEF) 40 [Source:MGI Symbol;Acc:MGI:2685515]	-	503	515	486	564	498	414	380	329	392	382	406	329	3.28293968344101	3.36575122562939	2.72015880930205	3.02667468727978	2.80249563801179	2.47707568807016	2.26895309375588	1.72260157646389	2.36280920603542	2.66869978260571	2.43155139084477
ENSMUSG00000028410	4481.46694386734	4684.37352650557	5069.23407868754	6350.67827275692	4770.57570769897	5345.40664448771	3635.06732215446	3693.932569612	4946.05846550718	4274.81120851736	3596.63395104283	4583.49060517962	5116.95586233401	4121.66568700224	0.312312163984374	0.00264631137120736	0.0428221294613555	Dnaja1	4	40722150	40737149	+	8629	protein_coding	DnaJ heat shock protein family (Hsp40) member A1 [Source:MGI Symbol;Acc:MGI:1270129]	-	4210	4359	5475	7111	5174	5470	3717	4340	5042	3707	3703	4016	33.0086490244979	34.2225516880978	36.8122912733517	45.8424747916521	34.9778219286936	39.3166944648699	26.661539179578	27.2979106176039	36.5086827872983	31.1106925434206	26.641695902262
ENSMUSG00000039062	5838.68080453975	5634.3588895317	6081.22911941914	5597.81344587827	5447.34466198019	5792.97451344116	3631.1554929135	3491.36207385908	5481.66892210514	5306.90077733933	4182.31320367012	5268.2750581447	5732.06690579837	4560.27925467198	0.330186125050547	0.00267599549287813	0.0431886683883433	Anpep	7	79471551	79510807	-	4135	protein_coding	alanyl (membrane) aminopeptidase [Source:MGI Symbol;Acc:MGI:5000466]	-	5485	5243	6568	6268	5908	5928	3713	4102	5588	4602	4306	4616	89.744375767472	85.8994398681188	92.1566810051374	84.324023205592	83.3473468634817	88.9165945833374	55.5779547696432	53.8418890827757	84.4373656466185	80.5969602092662	64.6497925051326
ENSMUSG00000037736	17.0317033496146	34.3886104262854	28.7025125916555	41.9746700632225	15.67448531714	27.3622277962808	10.7575304126174	0	17.6574875801526	4.61269081037751	5.82765425499784	13.6956890593016	27.5223682573665	8.75850868624117	1.66101721281419	0.00267668368412165	1	Limch1	5	66903170	67214501	+	11703	protein_coding	LIM and calponin homology domains 1 [Source:MGI Symbol;Acc:MGI:1924819]	-	16	32	31	47	17	28	11	0	18	4	6	12	0.0924972669556941	0.18524170145668	0.153685779407619	0.223407885501882	0.0847380612463893	0.148392163434494	0.0581766361006419	0	0.0961012622212118	0.0247520029513091	0.0318289761719515
ENSMUSG00000034295	64.9333690204056	44.0604071086782	45.3684876448748	70.5531688296719	50.7115701436883	85.9955730740253	32.2725912378523	29.7897787871936	42.18177588592	25.3697994570763	28.1669955658229	45.6522968643388	60.2704293035574	33.905539633034	0.832226377867099	0.00268250979417976	0.0432369885723305	Fhod3	18	24841680	25266558	+	7251	protein_coding	formin homology 2 domain containing 3 [Source:MGI Symbol;Acc:MGI:1925847]	-	61	41	49	79	55	88	33	35	43	22	29	40	0.569164825766548	0.383064529539239	0.392073392074778	0.606075922728936	0.442477907243278	0.752722516122417	0.281688528045433	0.261981295927262	0.370530823996063	0.219721389872492	0.248295424448814
ENSMUSG00000020280	567.368617834036	473.918037437246	538.866526720758	517.092212055444	523.71221530209	524.768440235813	401.940454507797	359.179618519877	441.437189503814	500.47695292596	351.601806718203	454.240353800171	524.287674930898	418.146062662637	0.328627743441118	0.00271086987839218	0.0435227501260298	Pus10	11	23615674	23682876	+	4325	protein_coding	pseudouridylate synthase 10 [Source:MGI Symbol;Acc:MGI:1921717]	-	533	441	582	579	568	537	411	422	450	434	362	398	8.33771834670905	6.90777949260881	7.80739348625086	7.44715335507324	7.66106295104208	7.70084379370666	5.88178080524369	5.29573794217236	6.50100041488347	7.26693339271676	5.1962625027671
ENSMUSG00000031138	4729.4911238961	4510.2811862225	4993.3113034451	4585.95597392868	4817.59916365039	4628.12538725663	3660.49421222064	3230.06315706856	4597.81357156529	4186.01691041759	3740.38275599945	4289.03329040463	4710.79402306657	3950.63398294603	0.254199215163975	0.00271617376677098	0.0435509741559806	F9	X	59044824	59076119	+	2734	protein_coding	coagulation factor IX [Source:MGI Symbol;Acc:MGI:88384]	-	4443	4197	5393	5135	5225	4736	3743	3795	4687	3630	3851	3758	109.947137297819	103.998349535058	114.446128322733	104.4815923632	111.484525974761	107.439337997172	84.7372650085055	75.3378837897038	107.114985926373	96.1514142883311	87.4467417001025
ENSMUSG00000022562	4520.85275786332	4368.42816821407	4546.10763951705	5032.49501715445	4735.53862287242	5438.2427745108	3823.81308303038	3463.27456814544	3993.53510771117	4726.85490793436	3485.90852019788	4290.17459782624	4773.61083002202	3963.92679747425	0.268547847867694	0.00275721367842832	0.0439096458582075	Oplah	15	76180801	76212215	-	5837	protein_coding	5-oxoprolinase (ATP-hydrolysing) [Source:MGI Symbol;Acc:MGI:1922725]	-	4247	4065	4910	5635	5136	5565	3910	4069	4071	4099	3589	3759	49.226469643867	47.1798813853419	48.8046265545167	53.7034358858956	51.3289202754912	59.1324149175835	41.4610398186728	37.8353837689192	43.5777899148666	50.8552492085001	38.1726568932588
ENSMUSG00000032086	607.818913289371	587.830309474316	653.67657708738	607.293098787049	730.246610069112	702.622920911638	397.050667956607	468.976231764104	539.534342726884	627.325950211342	535.172915750635	503.316572929335	648.248071603144	511.896113556485	0.342184574413633	0.0027591131110754	0.0439096458582075	Bace1	9	45749878	45775697	+	6348	protein_coding	beta-site APP cleaving enzyme 1 [Source:MGI Symbol;Acc:MGI:1346542]	-	571	547	706	680	792	719	406	551	550	544	551	441	6.08562676403199	5.83762773109984	6.45263319685955	5.95895135053223	7.27805059830853	7.02493180279798	3.95860565887666	4.71101869474969	5.41351772628442	6.20596816530044	5.38869129346072
ENSMUSG00000038949	619.528209342231	524.426309000853	687.934414696775	604.613864527695	583.644070926449	558.971224981164	398.028625266845	599.200121890979	403.179299746817	477.413498874073	424.447484905676	494.186113556468	596.519682245861	466.075857373476	0.355759649550512	0.00276679614405467	0.0439096458582075	Cnst	1	179373935	179455043	+	8859	protein_coding	consortin, connexin sorting protein [Source:MGI Symbol;Acc:MGI:2445141]	-	582	488	743	677	633	572	407	704	411	414	437	433	4.4447199869921	3.73182361330283	4.86601347479934	4.25110480671732	4.16817376131412	4.00462143228623	2.84356285975562	4.31308586665725	2.89875100337046	3.38425595110104	3.06242427770878
ENSMUSG00000070056	684.461578362636	574.934580564459	707.378052258865	662.663940147045	810.463093750946	698.714031226455	499.736185531592	535.364881632707	533.6485135335	623.866432103559	507.005920184812	631.143004149484	689.769212718401	555.127489522609	0.315137131429587	0.00276779231200134	0.0439096458582075	Mfhas1	8	36054952	36146603	+	6666	protein_coding	malignant fibrous histiocytoma amplified sequence 1 [Source:MGI Symbol;Acc:MGI:1098644]	-	643	535	764	742	879	715	511	629	544	541	522	553	6.52607088454789	5.43718939018399	6.64962637929224	6.19207832426592	7.69219655092346	6.65259174704164	4.74469954774636	5.12136209758449	5.09902782816209	5.87732244155758	4.86153948518007
ENSMUSG00000015451	261.862439000324	216.003459240105	315.727638508211	317.042720690298	271.076393131716	264.827276171146	209.282864390921	148.948893935968	112.81172620653	292.905866458972	134.03604786495	194.02226167344	274.423321123633	182.00127675513	0.596344047663201	0.00278231561087332	0.0440365983669409	C4a	17	35028069	35042440	-	6206	lncRNA	complement component 4A (Rodgers blood group) [Source:MGI Symbol;Acc:MGI:98320]	-	246	201	341	355	294	271	214	175	115	254	138	170	2.68181897291827	2.19417000715866	3.18795221406396	3.18210442135656	2.76351843609931	2.70836791256516	2.13429834572355	1.5304756499908	1.15781683723732	2.96394067825287	1.3804984993922
ENSMUSG00000019102	56.4175173455983	2.14928815164284	2.77766250886989	3.57231234580617	0	7.81777937036593	0	0	2.9429145966921	0	0	2.28261484321694	12.1224266203805	0.870921573318173	3.81785879667347	0.00281295782445136	1	Aldh3a1	11	61098363	61109247	+	1942	protein_coding	aldehyde dehydrogenase family 3, subfamily A1 [Source:MGI Symbol;Acc:MGI:1353451]	-	53	2	3	4	0	8	0	0	3	0	0	2	1.84642965707621	0.0697696843507829	0.0896274879442889	0.114579945396434	0	0.25549999833366	0	0	0.0965218908148679	0	0
ENSMUSG00000043252	1085.77108853793	854.342040278028	1083.28837845926	1035.07750219734	1202.32522667945	1117.94244996233	861.580390319633	839.220625262081	974.104731505084	924.844507480692	692.519580635577	861.687103314395	1063.12444768572	858.992823086244	0.308270900680627	0.00282209567584067	0.0445513870060092	Tmem64	4	15265831	15286753	+	4670	protein_coding	transmembrane protein 64 [Source:MGI Symbol;Acc:MGI:2140359]	-	1020	795	1170	1159	1304	1144	881	986	993	802	713	755	14.7771068721378	11.532839183333	14.5357744794958	13.8058897398016	16.2887410016313	15.1935508645069	11.6764857462293	11.4593552003293	13.2857525609376	12.4366968850329	9.47853619928867
ENSMUSG00000062908	10231.795787281	11065.6100487332	11176.3880481895	10465.0890170392	10009.541917816	9922.71646583696	6268.70635862525	6733.34114244252	8763.99966894906	10764.8671787185	7040.77761574656	9820.95036294089	10478.5235474826	8232.10705457047	0.348261867972529	0.00283595688852243	0.0447127374901572	Acadm	3	153627994	153650269	-	3913	protein_coding	acyl-Coenzyme A dehydrogenase, medium chain [Source:MGI Symbol;Acc:MGI:87867]	-	9612	10297	12071	11718	10856	10154	6410	7911	8934	9335	7249	8605	166.191970545842	178.273525429842	178.979214272633	166.587147195362	161.840344342404	160.944985980748	101.391443773716	109.729066237934	142.655950581203	172.763516878556	115.010336890254
ENSMUSG00000030872	634.430949773144	510.455936015174	450.907213939878	536.739929957378	617.75912720493	503.269546967307	352.064631685662	441.739862587242	435.55136031043	424.367554554731	460.38468614483	458.805583486605	542.260450642969	428.818946461583	0.338506625835398	0.00290113886495336	0.0453774356161828	Gga2	7	121585945	121620445	-	9769	protein_coding	golgi associated, gamma adaptin ear containing, ARF binding protein 2 [Source:MGI Symbol;Acc:MGI:1921355]	-	596	475	487	601	670	515	360	519	444	368	474	402	4.12764437921463	3.29404469901626	2.89233136224325	3.42233254759659	4.00084291614863	3.26969512403321	2.2808961745679	2.88348299882395	2.83979279050528	2.72800568426694	3.01229052544657
ENSMUSG00000028344	375.761955150872	292.303188623426	385.169201229958	360.803546926424	407.536618245641	450.499536217337	264.048473764246	173.6318535025	266.82425676675	386.312855369117	221.450861689918	299.022544461419	378.679007732276	268.548474258992	0.499257160636534	0.00290708738890201	0.0453774356161828	Invs	4	48279760	48431954	+	11431	protein_coding	inversin [Source:MGI Symbol;Acc:MGI:1335082]	-	353	272	416	404	442	461	270	204	272	335	228	262	2.08927979211912	1.61202089696912	2.11143784272384	1.96605193333455	2.25561436444133	2.50130609207625	1.4619504896348	0.9686036238819	1.48675179347951	2.12230669518463	1.23828110483188
ENSMUSG00000025271	1165.60719798925	1033.80760094021	1086.99192847108	1043.1152049754	956.143604345541	1044.65076836515	691.41581833823	805.175163791003	1090.84034384054	866.032699648378	751.767398894722	873.10017753048	1055.05271751444	846.388600340558	0.3180510159166	0.00290767316641718	0.0453774356161828	Pfkfb1	X	149371225	149426874	+	4017	protein_coding	6-phosphofructo-2-kinase/fructose-2,6-biphosphatase 1 [Source:MGI Symbol;Acc:MGI:107816]	-	1095	962	1174	1168	1037	1069	707	946	1112	751	774	765	18.4424413294253	16.2240482179325	16.9564705654375	16.1747976490623	15.0592634744227	16.505398479608	10.893582021999	12.7817244740074	17.2964409013584	13.5389712842244	11.9621089245967
ENSMUSG00000024228	1478.56474703842	1406.70909525024	1712.89188046976	1740.60919049406	1532.41144688745	1727.72924085087	1071.84121202079	839.220625262081	1505.79130197412	1508.34989499345	1183.01381376456	1296.52523094722	1599.8192668318	1234.12367982704	0.3753510963554	0.00293214011910039	0.0456327280460701	Nudt12	17	59306613	59320367	-	4401	protein_coding	nudix (nucleoside diphosphate linked moiety X)-type motif 12 [Source:MGI Symbol;Acc:MGI:1915243]	-	1389	1309	1850	1949	1662	1768	1096	986	1535	1308	1218	1136	21.3529065920881	20.1499636054385	24.3887507337307	24.6353261172344	22.02959220677	24.9161554839438	15.4138919837485	12.159779319595	21.792688090767	21.5230560795975	17.1816371625746
ENSMUSG00000023905	155.414293065233	139.703729856785	58.3309126862676	110.741682719991	108.799368671913	104.562799078644	47.9199082016595	70.6443325524876	97.1161816908392	74.9562256686346	53.4201640041469	60.4892933452489	112.925464346472	67.4243509105028	0.741925569046816	0.00293455594851866	0.0456327280460701	Tnfrsf12a	17	23894419	23896442	-	1932	protein_coding	tumor necrosis factor receptor superfamily, member 12a [Source:MGI Symbol;Acc:MGI:1351484]	-	146	130	63	124	118	107	49	83	99	65	55	53	5.11271820706015	4.55850272028951	1.89191936508488	3.57036328817603	3.56288407716619	3.43500043049589	1.56979189920971	2.33169164850328	3.20170905525964	2.43642920355151	1.76735662074872
ENSMUSG00000105272	36.192369617931	41.9111189570353	39.813162627135	97.3455114232182	82.9825693260354	46.9066762221956	14.6693596535692	1.70227307355392	4.90485766115349	35.7483537804257	12.626584219162	49.0762191291642	57.5252346955918	19.7879412528381	1.55585780252823	0.00294419251244549	0.0457150094031043	Gm43071	3	106474921	106476952	+	2032	TEC	predicted gene 43071 [Source:MGI Symbol;Acc:MGI:5663208]	-	34	39	43	109	90	48	15	2	5	31	13	43	1.13203886307224	1.30025008694872	1.22776132025521	2.9840125100426	2.58372098682794	1.46510136839754	0.456899498223299	0.0534203143073279	0.153744678446911	1.10480479905442	0.397180823968547
ENSMUSG00000029759	1192.21923447302	1203.60136491999	1306.4272666718	1244.95085251345	1298.21619567842	1170.7124607123	883.095451144868	1144.77864196501	1046.69662489016	1042.46812314532	825.584352791361	1152.72049582455	1236.0212291615	1015.89061496021	0.283341653546949	0.00296676581859878	0.045883605749755	Pon3	6	5220852	5256286	-	3385	protein_coding	paraoxonase 3 [Source:MGI Symbol;Acc:MGI:106686]	-	1120	1120	1411	1394	1408	1198	903	1345	1067	904	850	1010	22.3854316285891	22.415340361939	24.1845235470604	22.9087791743031	24.2644688386345	21.9506954993808	16.5113355330761	21.5657098692023	19.695161128898	19.3400378321573	15.5893811875577
ENSMUSG00000033075	215.025254788884	210.630238860998	264.803825845596	240.238005255465	251.713793622307	261.895608907259	193.635547427114	178.738672723161	154.01253056022	153.371969445052	154.432837757443	236.250636272953	240.717787880085	178.407032364324	0.434329683048898	0.00296999402141795	0.045883605749755	Senp1	15	97936625	97991625	-	11873	protein_coding	SUMO1/sentrin specific peptidase 1 [Source:MGI Symbol;Acc:MGI:2445054]	-	202	196	286	269	273	268	198	210	157	133	159	207	1.15105751530185	1.11835991298775	1.39757383233986	1.2603456227408	1.34130945595421	1.39998849419632	1.0321857240078	0.959972901592813	0.826214811704662	0.811220160062951	0.83139092611128
ENSMUSG00000056708	168.188070577444	170.868408055606	146.290225467147	156.28866512902	206.534394767021	128.993359611038	151.583383086882	103.838657486789	109.868811609838	72.6498802634458	111.696706554125	115.272049582455	162.860520601213	110.818248097256	0.553530034952366	0.00297495560449881	0.045885412299286	Ier5	1	154972107	154975382	-	3276	protein_coding	immediate early response 5 [Source:MGI Symbol;Acc:MGI:1337072]	-	158	159	158	175	224	132	155	122	112	63	115	101	3.26301685361022	3.28805610416148	2.79822343211984	2.97161129754105	3.98869595079535	2.49908011190643	2.92847102076537	2.02123162363306	2.13613119045554	1.3926571660537	2.17932786101649
ENSMUSG00000027288	1288.0225658146	1378.76834927888	1386.97947942903	1746.86073709922	1469.71350561889	1922.19650268872	1124.65090677364	1318.41049546751	1103.59297375954	1312.3105355524	1237.40525347788	1301.09046063366	1532.09018998823	1232.91010427744	0.313843177850879	0.00297758293458157	0.045885412299286	Zfp106	2	120337301	120394324	-	10429	protein_coding	zinc finger protein 106 [Source:MGI Symbol;Acc:MGI:1270153]	-	1210	1283	1498	1956	1594	1967	1150	1549	1125	1138	1274	1140	7.84962348601742	8.33431626967254	8.33370918332016	10.4333560443358	8.91604920691619	11.6980058087391	6.82508867867296	8.06137078644584	6.74005820173819	7.90218433774993	7.58394865872094
ENSMUSG00000024140	5075.44759818515	5045.45393598156	5253.48569177591	5254.87146068088	6303.90918313449	7059.45477144044	3988.10991115035	4022.47127280791	5822.0660437892	4399.35386039755	4197.85361501678	4719.30618835102	5665.43710686641	4524.86014858547	0.324408083920932	0.00299426286584166	0.0459703117995474	Epas1	17	87061128	87140838	+	5590	protein_coding	endothelial PAS domain protein 1 [Source:MGI Symbol;Acc:MGI:109169]	-	4768	4695	5674	5884	6837	7224	4078	4726	5935	3815	4322	4135	57.7072743335208	56.8996738200617	58.8907002939313	58.5542875804964	71.3477988198519	80.1523148618717	45.1532005298673	45.8861960470652	66.3380508942922	49.4231357069292	48.0000376917885
ENSMUSG00000053094	1109.18968064365	1089.68909288292	1136.98985363074	1232.44775930313	1145.15945669929	1229.34580599004	1024.89926112937	924.334278939777	977.047646101776	1050.54033206348	849.866245520519	1052.28544272301	1157.13694152496	979.828867746322	0.241086233370947	0.00299432091187412	0.0459703117995474	Tmem248	5	130245922	130272606	+	4086	protein_coding	transmembrane protein 248 [Source:MGI Symbol;Acc:MGI:1918917]	-	1042	1014	1228	1380	1242	1258	1048	1086	996	911	875	922	17.2534313329074	16.8122399886624	17.436896899154	18.7879142477133	17.7316863495434	19.09556087644	15.8750845137616	14.4255244050813	15.2305212852524	16.1460977166657	13.2946930422094
ENSMUSG00000032010	2297.15098927927	2508.21927296719	2224.90766960478	2628.32880842689	1667.94964345331	2160.63877348488	1246.89557055338	1748.23444653987	1803.02567624002	1690.55118200336	1614.2602286344	2271.20176900086	2247.86585953605	1729.02814549532	0.378805537396644	0.00301533858264795	0.0460083436246068	Usp2	9	43978318	44006924	+	4818	protein_coding	ubiquitin specific peptidase 2 [Source:MGI Symbol;Acc:MGI:1858178]	-	2158	2334	2403	2943	1809	2211	1275	2054	1838	1466	1662	1990	30.3033587817016	32.8185995059693	28.9371776363294	33.9798385950555	21.9027465772543	28.4624373143714	16.3793444028909	23.1384248228824	23.8359520538969	22.0350853222511	21.4157282596257
ENSMUSG00000018428	3555.36807423205	3614.02802698743	3635.03433660773	3434.77832049264	3926.91958621761	3559.04405835909	2809.67135231363	2392.54480488003	2985.09637257802	3790.47867342772	2586.50721350988	3179.6824766012	3620.86206714942	2957.33014888508	0.292549481471983	0.00304200048785574	0.0463006038937762	Akap1	11	88721618	88755412	-	4390	protein_coding	A kinase (PRKA) anchor protein 1 [Source:MGI Symbol;Acc:MGI:104729]	-	3340	3363	3926	3846	4259	3642	2873	2811	3043	3287	2663	2786	51.4740179485978	51.8977267576319	51.8865709425769	48.7351834128517	56.5939395890996	51.4547605414114	40.5064545035647	34.7533338437779	43.3103031816102	54.2229005582149	37.6595624592919
ENSMUSG00000071647	607.818913289371	538.396681986531	547.199514247368	623.368504343177	543.996843359565	553.10789045339	436.168960366125	503.021693235183	466.942449341813	482.02618968445	504.092093057313	439.403357319261	568.9813912799	471.942457167357	0.269183694475492	0.00304222336282995	0.0463006038937762	Eml3	19	8906916	8918946	+	4108	protein_coding	echinoderm microtubule associated protein like 3 [Source:MGI Symbol;Acc:MGI:2387612]	-	571	501	591	698	590	566	446	591	476	418	519	385	9.4039821562987	8.26215387434511	8.34691980837351	9.45198084615337	8.37815486500131	8.54547359324506	6.71981859873135	7.80831262115892	7.23986235752494	7.3687429798791	7.84342136176732
ENSMUSG00000040054	1279.5067141398	1339.00651847349	1252.72579150032	1458.39651517537	1292.68402439002	1377.883614027	1209.73319276434	971.14678846251	1134.98406279092	1141.64097556843	1198.55422511122	1145.8726512949	1333.36719628433	1133.65531599872	0.234706869670516	0.00307913245228133	0.046573774358275	Baz2a	10	127927446	127965172	+	10730	protein_coding	bromodomain adjacent to zinc finger domain, 2A [Source:MGI Symbol;Acc:MGI:2151152]	MBD	1202	1246	1353	1633	1402	1410	1237	1141	1157	990	1234	1004	7.57898188052977	7.86691229512995	7.3158917330943	8.46611781725243	7.62210801016734	8.15022373528884	7.13547852340549	5.77146504032206	6.73732393105256	6.68163941364816	7.13976736634343
ENSMUSG00000030747	22624.4889370443	23622.8260747064	22711.0945600232	24073.8128983878	23064.5441298975	20960.4437143724	15759.7820544845	18844.1629242419	19565.4772103413	20115.9446240563	20081.1252870134	22237.2338026194	22842.8683857386	19433.9543171261	0.233212997988077	0.00309859095759573	0.0468010579359401	Dgat2	7	98802865	98831926	-	3083	protein_coding	diacylglycerol O-acyltransferase 2 [Source:MGI Symbol;Acc:MGI:1915050]	-	21254	21982	24529	26956	25015	21449	16115	22140	19945	17444	20675	19484	466.415822244741	483.036186363393	461.610324334238	486.384546686861	473.318837879908	431.502846237039	323.526538241555	389.766257186009	404.216751658724	409.751087720183	416.332790344994
ENSMUSG00000075256	100.061257178986	47.2843393361424	101.847625325229	98.2385895096698	98.6570546431754	88.9272403379125	55.7435666835631	55.3238748905023	30.4101174991517	44.9737354011808	28.1669955658229	84.4567491990268	89.1693510551858	49.8458398732079	0.843688294576925	0.0031028919633185	0.0468010579359401	Cerkl	2	79160887	79287129	-	5284	protein_coding	ceramide kinase-like [Source:MGI Symbol;Acc:MGI:3037816]	-	94	44	110	110	107	91	57	65	31	39	29	74	1.20356948366713	0.564125661279873	1.20781125250183	1.1580510946057	1.18126619530675	1.0681413395515	0.667675088092548	0.667652830593477	0.366566418801204	0.534502031180339	0.340724852891437
ENSMUSG00000050122	46.8371842114401	29.0153900471783	23.1471875739157	34.8300453716102	21.2066566055424	29.3166726388723	7.82365848190359	0	18.6384591123833	9.22538162075503	19.4255141833261	9.13045937286776	30.7255227414265	10.7072454618726	1.52401189308975	0.00310437785877857	1	Vwa3b	1	37065677	37226694	+	5964	protein_coding	von Willebrand factor A domain containing 3B [Source:MGI Symbol;Acc:MGI:1918103]	-	44	27	25	39	23	30	8	0	19	8	20	8	0.499138609448666	0.306698828743205	0.243204479079769	0.363768272318708	0.224966063120186	0.311985033176539	0.083024348794075	0	0.199053472350045	0.0971404059487494	0.208190536631091
ENSMUSG00000030660	383.213325366328	293.377832699247	494.42392657884	542.991476562538	528.322358042425	492.520100333054	225.908138664966	295.344378261605	296.253402733671	340.185947265342	398.223040758186	391.468445611705	455.808169930406	324.563892215912	0.491908562021661	0.00312339143290397	0.0469540925078661	Pik3c2a	7	115936500	116042684	-	11133	protein_coding	phosphatidylinositol-4-phosphate 3-kinase catalytic subunit type 2 alpha [Source:MGI Symbol;Acc:MGI:1203729]	-	360	273	534	608	573	504	231	347	302	295	410	343	2.18774356342459	1.66125547801658	2.78290411592832	3.03801011424601	3.00240462181433	2.80781485638462	1.28425982376736	1.69167687502713	1.69491735119815	1.91892220670653	2.28633714089558
ENSMUSG00000027820	1652.07522491262	1729.10231799666	1830.47959334526	2375.58770996111	1821.00638243244	2180.1832219108	658.16526979014	1305.64344741585	922.113240296857	1509.50306769604	1145.13406110708	1848.91802300572	1931.40574175981	1231.57951821862	0.64952330150699	0.00313291365950751	0.0470396645061995	Mme	3	63148958	63293451	+	11542	protein_coding	membrane metallo endopeptidase [Source:MGI Symbol;Acc:MGI:97004]	-	1552	1609	1977	2660	1975	2231	673	1534	940	1309	1179	1620	9.09738909831064	9.44410837627082	9.93790393921038	12.8203066091939	9.98189131898757	11.9886047021791	3.60900197656268	7.2134734311038	5.08862650160934	8.21308161314708	6.34163670504059
ENSMUSG00000032855	842.004834346572	736.131191937672	745.339439880086	931.48044416896	780.036151664733	969.404641925376	570.149111868724	592.391029596763	546.401143452499	801.455028303093	736.226987548061	693.91491233795	834.066117320566	656.756368851182	0.346047745715816	0.00315354559016045	0.0472916324033585	Pkd1	17	24768808	24815482	+	17415	protein_coding	polycystin 1, transient receptor potential channel interacting [Source:MGI Symbol;Acc:MGI:97603]	-	791	685	805	1043	846	992	583	696	557	695	758	608	3.07297571242229	2.66472919900419	2.68189392627402	3.33164465805554	2.83382933248367	3.53295685321458	2.07204031760827	2.1691316323874	1.9984142054378	2.89007349877582	2.70218046866096
ENSMUSG00000022974	436.437398333874	448.126579617532	446.277776425095	444.752887052869	406.614589697573	494.474545175645	353.0425889959	334.496658953345	377.674039908819	425.520727257326	355.486909554868	318.424770628763	446.113962717098	360.774282549837	0.307097998698335	0.00316831143898085	0.0474551232848327	Paxbp1	16	90810925	90841431	-	5508	protein_coding	PAX3 and PAX7 binding protein 1 [Source:MGI Symbol;Acc:MGI:1914617]	GCFC	410	417	482	498	441	506	361	393	385	369	366	279	5.03611974882921	5.1289458208828	5.07717697442048	5.0295977883087	4.67058698650118	5.69779376276706	4.05663932123817	3.87256544283666	4.36737606545342	4.85154424514134	4.12530228695738
ENSMUSG00000066072	20669.0364962167	15065.4352989405	17454.8312057384	20102.2946479378	16217.5601319515	16034.2654886205	4880.00697808736	7167.42077619877	14923.5199198256	15875.7285966168	7773.11950045795	10485.191282317	17590.5705449009	10184.1645089173	0.788507720084759	0.00318504597986952	0.0475897016116271	Cyp4a10	4	115375461	115390846	+	2109	protein_coding	cytochrome P450, family 4, subfamily a, polypeptide 10 [Source:MGI Symbol;Acc:MGI:88611]	-	19417	14019	18852	22509	17589	16408	4990	8421	15213	13767	8003	9187	622.890452178117	450.325400650133	518.620938216118	593.714241629067	486.509557265832	482.535431182028	146.445857567404	216.714132883129	450.7046899771	472.726876559123	235.583495230536
ENSMUSG00000020649	93.6743684228803	131.106577250213	124.994812899145	175.936383030954	177.029481228876	175.900035833234	64.5451824757046	18.7250038090931	100.059096287531	128.002169987976	54.3914397133132	99.2937456799369	146.440276444217	77.5027729922592	0.924311221558853	0.00321355617439566	0.0478424928882566	Rrm2	12	24758240	24764145	+	2771	protein_coding	ribonucleotide reductase M2 [Source:MGI Symbol;Acc:MGI:98181]	-	88	122	135	197	192	180	66	22	102	111	56	87	2.14858366420198	2.9826980684094	2.82661355880599	3.95482750181299	4.04195533375437	4.02889658144687	1.47421401433232	0.430909731287403	2.29994493205489	2.90090839497004	1.25464287596893
ENSMUSG00000086916	6.38688875610547	6.44786445492852	5.55532501773977	16.9684836425793	6.45419983646942	1.95444484259148	0.977957310237949	0	1.9619430644614	0	0	2.28261484321694	7.294534425069	0.870419202986048	3.10250802166344	0.00323946647327777	1	Gm15903	5	129804110	129808753	+	3614	lncRNA	predicted gene 15903 [Source:MGI Symbol;Acc:MGI:3802037]	-	6	6	6	19	7	2	1	0	2	0	0	2	0.112323137297574	0.112473210024256	0.0963235094564522	0.292457860074544	0.112989138893933	0.0343235332570536	0.0171263563989991	0	0.0345776631548558	0	0
ENSMUSG00000027259	218.218699166937	227.824544074141	212.028238177068	252.741098465787	226.819022824497	259.941164064667	174.076401222355	196.612539995477	186.384591123833	176.43542349694	165.116870558272	188.315724565398	232.928794462183	181.156925160379	0.362553792941477	0.00324414649987392	0.0480186768742409	Adal	2	120970909	120987161	+	5317	protein_coding	adenosine deaminase-like [Source:MGI Symbol;Acc:MGI:1923144]	-	205	212	229	283	246	266	178	231	190	153	170	165	2.60851491222036	2.70119034473902	2.49883751386172	2.96085827866487	2.6989525779526	3.10288097468533	2.07207975561876	2.35800904394821	2.23275326141746	2.08387820446178	1.9849560022525
ENSMUSG00000025534	835.617945590466	639.413225113744	646.269477063727	709.997078728977	764.361666347593	662.556801638513	500.71414284183	498.766010551298	601.335549257418	590.424423728322	663.381309360588	575.218940490669	709.702699080503	571.640062705021	0.312549200923127	0.00324894320814967	0.0480186768742409	Gusb	5	130017852	130031890	-	4548	protein_coding	glucuronidase, beta [Source:MGI Symbol;Acc:MGI:95872]	-	785	595	698	795	829	678	512	586	613	512	683	504	11.6776464849694	8.86303568277112	8.90438976460647	9.7239903198164	10.6331240752939	9.24611685922301	6.96791157372543	6.99322186698321	8.42158449376988	8.15261749978317	9.32328309366234
ENSMUSG00000055691	8.5158516748073	4.29857630328568	1.85177500591326	3.57231234580617	0.92202854806706	3.90888968518297	0	0	0	0	0	0	3.84490559384374	0	4.37012394277404	0.003281093551664	1	Gja6	X	159685112	159690048	-	2017	protein_coding	gap junction protein, alpha 6 [Source:MGI Symbol;Acc:MGI:95717]	-	8	4	2	4	1	4	0	0	0	0	0	0	0.26834296360498	0.134350745671017	0.0575298567469209	0.110319411978123	0.0289215063363322	0.1229997513049	0	0	0	0	0
ENSMUSG00000096960	10.6448145935091	3.22393222746426	14.8142000473061	3.57231234580617	2.76608564420118	2.93166726388722	0	0	0	1.15317270259438	1.94255141833261	0	6.32550202036234	0.515954020154499	3.64096605942839	0.00329674430147326	1	A230028O05Rik	16	24878123	24887808	+	3081	lncRNA	RIKEN cDNA A230028O05 gene [Source:MGI Symbol;Acc:MGI:2442126]	-	10	3	16	4	3	3	0	0	0	1	2	0	0.219590943521277	0.0659653003939729	0.301298853770956	0.0722214391301117	0.0568010499322123	0.0603920395282336	0	0	0	0.0235047622962651	0.0403001739846747
ENSMUSG00000002221	473.694249411156	463.171596679032	501.831026602493	484.048322856736	508.03772998495	492.520100333054	371.623777890421	372.797803108308	441.437189503814	443.971490498836	314.693329769883	414.294594043875	487.217170977903	393.136364135856	0.311327985982044	0.00330002293333923	0.0486565206089705	Paxip1	5	27945078	27996689	-	10271	protein_coding	PAX interacting (with transcription-activation domain) protein 1 [Source:MGI Symbol;Acc:MGI:1890430]	-	445	431	542	542	551	504	380	438	450	385	324	363	2.93125367695579	2.84282763805735	3.06165148543123	2.93551566659166	3.12943313528288	3.0434624472914	2.28993941873951	2.31452314567962	2.73749652364629	2.71453572820516	1.95839776453888
ENSMUSG00000038150	2554.75550244219	2435.14347581134	2491.56327045629	2643.51113589657	2532.81242154021	2363.9010371144	1508.98812969716	1583.96509494192	2270.94909711407	2521.98870057391	1657.96763554689	2250.6582354119	2503.61447387683	1965.75281554764	0.349552236336398	0.00331672788134722	0.0488441868569623	Ormdl3	11	98472082	98478194	-	2184	protein_coding	ORM1-like 3 (S. cerevisiae) [Source:MGI Symbol;Acc:MGI:1913862]	-	2400	2266	2691	2960	2747	2419	1543	1861	2315	2187	1707	1972	74.3472194493467	70.289954075754	71.4875245807073	75.394023777613	73.3724181484476	68.6963044397915	43.7286850165255	46.2480989948499	66.2296032040791	72.5176481466536	48.5232085924584
ENSMUSG00000082633	7.45137021545639	5.3732203791071	0	7.14462469161235	0.92202854806706	5.86333452777445	0	0	0	0	0	0	4.45909639366956	0	4.58661924964532	0.00337291154400617	1	Gm15779	6	148905413	148905824	+	412	processed_pseudogene	predicted gene 15779 [Source:MGI Symbol;Acc:MGI:3783221]	-	7	5	0	8	1	6	0	0	0	0	0	0	1.14949463080665	0.822164605638473	0	1.08016628135861	0.141589024952384	0.90324210575965	0	0	0	0	0
ENSMUSG00000028986	366.181622016714	411.588681039604	429.611801371876	536.739929957378	368.811419226824	343.005069874805	307.078595414716	194.059130385147	345.301979345206	366.708919425012	263.215717184069	311.576926099112	409.323087247867	297.990211308877	0.460610089398309	0.00337407959181337	0.0493926645371297	Klhl7	5	24305603	24365790	+	3959	protein_coding	kelch-like 7 [Source:MGI Symbol;Acc:MGI:1196453]	-	344	383	464	601	400	351	314	228	352	318	271	273	5.87866975913703	6.55389169544474	6.79988665965676	8.44475035551177	5.8938800990535	5.49884850543548	4.90904792527371	3.1257158294175	5.55534395982072	5.81686761754586	4.24964265833268
ENSMUSG00000020212	54.2885544268965	29.0153900471783	60.1826876921809	87.5216524722512	39.6472275668836	72.3144591758849	19.559146204759	16.1715941987622	47.0866335470735	35.7483537804257	22.3393413108251	30.8153003834287	57.1616618968792	28.620061570879	1.00562700224502	0.00342791803478451	0.0498835181317813	Mdm1	10	117977716	118004902	+	4116	protein_coding	transformed mouse 3T3 cell double minute 1 [Source:MGI Symbol;Acc:MGI:96951]	-	51	27	65	98	43	74	20	19	48	31	23	27	0.838302831546205	0.444400343689134	0.91623564975766	1.32448960690401	0.609424481549181	1.11508120021057	0.300751467570374	0.250540754953512	0.728651164091248	0.545423554829585	0.346913414610788
ENSMUSG00000104443	21.2896291870182	17.1943052131427	8.33298752660966	29.4715768529009	23.9727422497436	2.93166726388722	4.88978655118974	0	0	6.91903621556627	5.82765425499784	5.70653710804235	17.1988180488837	3.89050235496603	2.16861240463903	0.00343659483400524	1	4932442E05Rik	10	118696731	118699447	+	2717	TEC	RIKEN cDNA 4932442E05 gene [Source:MGI Symbol;Acc:MGI:1921665]	-	20	16	9	33	26	3	5	0	0	6	6	5	0.498019651813806	0.398948036832449	0.192186140877228	0.675650568704071	0.558226586415139	0.0684828390822554	0.113902561696693	0	0	0.159922353996598	0.137097721067482
ENSMUSG00000032724	410.889843309452	295.52712085089	334.245388567343	387.59588951997	354.980991005818	349.845626823876	214.172650942111	192.356857311593	205.023050236216	387.466028071711	280.698679949063	252.228940175472	355.514143346225	255.324367781028	0.48053183289387	0.00345725979094495	0.0499871843864248	Abtb2	2	103396655	103548768	+	6032	protein_coding	ankyrin repeat and BTB (POZ) domain containing 2 [Source:MGI Symbol;Acc:MGI:2139365]	-	386	275	361	434	385	358	219	226	209	336	289	221	4.32944368431325	3.08856929107556	3.4722826013041	4.00245300972254	3.72328433984534	3.68105099555496	2.24716989285316	2.03351440483942	2.16490450929249	4.0339035154659	2.9744394576857
ENSMUSG00000039917	951.646424659715	1010.16543127213	1097.17669100361	1161.89459047346	863.018720990768	1228.36858356875	473.331338155167	541.322837390146	793.605969574635	912.159607752153	579.851598372285	1144.7313438733	1052.0450736614	740.833782519614	0.507275139622521	0.00346887498256378	0.0499871843864248	Rhbdd2	5	135661472	135675302	+	7534	protein_coding	rhomboid domain containing 2 [Source:MGI Symbol;Acc:MGI:1915612]	-	894	940	1185	1301	936	1257	484	636	809	791	597	1003	8.02819709461395	8.45255929046106	9.12561052922545	9.60615358381326	7.24731336214993	10.3480805835597	3.97624257772441	4.58175272336765	6.70929206166008	7.60323527397412	4.91945892752385
ENSMUSG00000024843	463.049434817647	362.155053551818	432.389463880746	616.223879651565	502.505558696548	598.060121832994	359.888290167565	204.27276882647	439.475246439353	405.916791313221	354.515633845702	349.240071012192	495.73058540522	352.218133600751	0.494944770705056	0.00347313339152625	0.0499871843864248	Chka	19	3901773	3944369	+	12024	protein_coding	choline kinase alpha [Source:MGI Symbol;Acc:MGI:107760]	-	435	337	467	690	545	612	368	240	448	352	365	306	2.44763363431669	1.89874621598916	2.25339386786169	3.19225788490338	2.64407848160414	3.15684017402225	1.89431403406202	1.08333411848793	2.32799926145454	2.12002634459805	1.88457107273269
ENSMUSG00000020010	2944.35571656462	2787.62673268076	2970.24710948487	2831.95061213784	2759.63144436471	2600.38886306797	1896.25922455138	2146.56634575149	2553.46889839651	2512.76331895315	1962.94820822511	2796.20318294075	2815.7000797168	2311.36819646973	0.285193239500859	0.00347996684121997	0.0499871843864248	Vnn3	10	23727360	23745741	+	1811	protein_coding	vanin 3 [Source:MGI Symbol;Acc:MGI:1347055]	-	2766	2594	3208	3171	2993	2661	1939	2522	2603	2179	2021	2450	103.333192814562	97.0370330927437	102.774436542185	97.4037409313585	96.4084440050709	91.1331883206045	66.2693154491335	75.5834617371674	89.8068594953651	87.1337372563298	69.2813731779536
ENSMUSG00000019866	763.233206354604	688.84685260153	763.857189939219	711.78323490188	659.250411867948	841.388504735634	635.672251654667	440.888726050465	583.678061677266	583.505387512756	623.559005284769	675.653993592214	738.059900066802	590.492904295356	0.322977040328139	0.00348656715278144	0.0499871843864248	Crybg1	10	43826632	44024849	-	7799	protein_coding	crystallin beta-gamma domain containing 1 [Source:MGI Symbol;Acc:MGI:109544]	-	717	641	825	797	715	861	650	518	595	506	642	592	6.2199423354424	5.56807526688744	6.13739709406943	5.68482691389985	5.34803115405477	6.84722141001693	5.15854902127053	3.60488144328439	4.76685385381338	4.69849921184832	5.11051575471436
ENSMUSG00000029263	272.507253593834	396.543663978104	361.096126153085	354.552000321263	374.343590515226	342.02784745351	223.95222404449	182.994355407046	294.29145966921	270.995585109679	308.865675514886	286.468162823726	350.17841366917	261.261243761506	0.424677708725448	0.00350502054810041	0.0501148572430375	Pigg	5	108460475	108497221	+	4573	protein_coding	phosphatidylinositol glycan anchor biosynthesis, class G [Source:MGI Symbol;Acc:MGI:3576484]	-	256	369	390	397	406	350	229	215	300	235	318	251	3.7874323732604	5.4665226619727	4.94803315250715	4.82933297737098	5.17906831004485	4.74697542279107	3.09946978218895	2.5517457811705	4.09896155614418	3.72146743257736	4.31712419231106
ENSMUSG00000079184	232.056958138499	258.989222272962	317.579413514124	289.3573000103	228.663079920631	297.075616073906	200.48124859878	176.18526311283	215.813737090754	229.481367816281	165.116870558272	235.109328851345	270.620264988404	203.697969338044	0.413181721988766	0.00351939117189957	0.0502096063978314	Mphosph8	14	56905705	56934887	+	3586	protein_coding	M-phase phosphoprotein 8 [Source:MGI Symbol;Acc:MGI:1922589]	-	218	241	343	324	248	304	205	207	220	199	170	206	4.11293959686598	4.55294857908842	5.54948944828207	5.02611672357775	4.03430011531923	5.25791351841349	3.53831669417917	3.13299864545531	3.83324155342482	4.01874410326931	2.94311518794661
ENSMUSG00000002732	69.1912948578093	56.9561360185352	74.996887739487	51.7985290141895	78.3724265857001	60.587790120336	36.1844204788041	21.278413419424	51.991491208227	44.9737354011808	46.6212340399827	25.1087632753863	65.3171773893428	37.6930096371675	0.795561650081541	0.00352559180428591	0.0502335481905331	Fkbp7	2	76493388	76503460	-	1485	protein_coding	FK506 binding protein 7 [Source:MGI Symbol;Acc:MGI:1336879]	-	65	53	81	58	85	62	37	25	53	39	48	22	2.9613724110632	2.41788368063592	3.16466511977835	2.1726981026385	3.33902198911278	2.58949678445842	1.5421563131053	0.913721200946888	2.22999150033919	1.90189140252991	2.00670442095811
ENSMUSG00000022914	678.074689606531	622.218919900602	710.155714767734	768.047154348327	700.741696530966	730.962371129215	543.7442644923	340.454614710783	603.29749232188	565.054624271245	543.914397133132	643.697385787177	701.700091047229	540.027129786086	0.379713759366148	0.00354011992080172	0.0503237880408411	Brwd1	16	95793292	95883726	-	20280	protein_coding	bromodomain and WD repeat domain containing 1 [Source:MGI Symbol;Acc:MGI:1890651]	-	637	579	767	860	760	748	556	400	615	490	560	564	2.12509135592716	1.93417872135943	2.19430305847879	2.35900219927874	2.1861122038013	2.28761948705281	1.69691452300032	1.07051359637564	1.89478944538003	1.74974874709312	1.71430740104039
ENSMUSG00000025375	447.082212927383	480.365901892174	538.866526720758	456.362902176739	339.306505688678	653.761799846851	208.304907080683	94.4761555822424	216.794708622984	512.008679951904	131.122220737451	244.239788224213	485.957641542097	234.491076699913	1.0528637583055	0.00354686007343923	0.0503613126265671	Aatk	11	119898139	119937993	-	7159	protein_coding	apoptosis-associated tyrosine kinase [Source:MGI Symbol;Acc:MGI:1197518]	-	420	447	582	511	368	669	213	111	221	444	135	214	3.96920062488341	4.23000761091783	4.71671697556013	3.97069366439083	2.99862573085355	5.79594019477396	1.84153665058449	0.841532248403856	1.92882889340721	4.49136313030422	1.1707118917667
ENSMUSG00000058799	1126.22138399327	1156.31702558385	1086.06604096813	959.165864848958	1071.39717285392	1069.08132889754	606.333532347528	731.977421628184	932.903927151395	1117.42434881395	768.279085950549	885.654559168173	1078.04146952428	840.428812509964	0.360089839845889	0.00356511466541573	0.0505620534880323	Nap1l1	10	111309084	111334011	+	4994	protein_coding	nucleosome assembly protein 1-like 1 [Source:MGI Symbol;Acc:MGI:1855693]	-	1058	1076	1173	1074	1162	1094	620	860	951	969	791	776	14.3332030319267	14.5965332661114	13.6275777734949	11.9633714834253	13.5732671529443	13.5868544868788	7.68415784063064	9.34652259294569	11.8983234465567	14.051503661016	9.8332384174014
ENSMUSG00000024921	2850.68134814174	3758.0303331475	3891.50517492671	3886.67583223712	3704.71070613345	3559.04405835909	2089.8947719785	2305.72887812878	2584.85998742789	3277.31682077322	3015.81107696138	3615.66191165563	3608.4412421576	2814.8789078209	0.358762753241817	0.00359027642356943	0.0508015841408753	Smarca2	19	26582450	26755722	+	14269	protein_coding	SWI/SNF related, matrix associated, actin dependent regulator of chromatin, subfamily a, member 2 [Source:MGI Symbol;Acc:MGI:99603]	-	2678	3497	4203	4352	4018	3642	2137	2709	2635	2842	3105	3168	12.6976443236155	16.6030579000366	17.0897239333184	16.9665364292062	16.4264305368684	15.8305696809024	9.26966650637925	10.3042316603748	11.5382746751961	14.4237470480118	13.5094195782907
ENSMUSG00000026924	2211.9924725312	2148.21350756702	2560.07894567508	2614.03955904367	2506.99562219434	2758.69889531788	1793.5737069764	1761.8526311283	1661.7657755988	2289.04781464984	2482.58071262908	1948.21176868566	2466.66983372153	1989.50540161135	0.310589874618585	0.00359565272814464	0.0508191102497957	Sec16a	2	26299443	26335228	-	9189	protein_coding	SEC16 homolog A, endoplasmic reticulum export factor [Source:MGI Symbol;Acc:MGI:2139207]	-	2078	1999	2765	2927	2719	2823	1834	2070	1694	1985	2556	1707	15.2997176008625	14.7377277881941	17.4580639202776	17.7195348063051	17.2610719604265	19.054289828391	12.3533346191808	12.2265024949426	11.5185800872213	15.6437123386727	17.2687627019032
ENSMUSG00000110384	5.32240729675456	3.22393222746426	1.85177500591326	10.7169370374185	0	4.88611210647871	0	0	0	0	0	0	4.33352727900488	0	4.54885731243024	0.00365817547803594	1	Gm45301	8	35874625	35876660	-	933	lncRNA	predicted gene 45301 [Source:MGI Symbol;Acc:MGI:5791137]	-	5	3	2	12	0	5	0	0	0	0	0	0	0.362572184881594	0.217833966252766	0.124370547758349	0.715479916269692	0	0.332382768464608	0	0	0	0	0
ENSMUSG00000022421	5.32240729675456	15.0450170614999	11.1106500354795	8.93078086451543	15.67448531714	26.385005374985	3.91182924095179	0	1.9619430644614	2.30634540518876	7.77020567333046	4.56522968643388	13.7447243250624	3.41925884506105	2.01838068794555	0.00367811268752945	1	Nptxr	15	79670552	79688967	-	5170	protein_coding	neuronal pentraxin receptor [Source:MGI Symbol;Acc:MGI:1920590]	-	5	14	12	10	17	27	4	0	2	2	8	4	0.0654313053180904	0.183452435022155	0.134666600841632	0.107598768839398	0.191816156821372	0.323909258042242	0.0478875450878011	0	0.0241709235283654	0.028014766976709	0.0960656371735264
ENSMUSG00000109697	13.8382589715619	4.29857630328568	9.25887502956629	1.78615617290309	1.84405709613412	1.95444484259148	0	0	0	0	1.94255141833261	0	5.49672806934042	0.323758569722102	3.92484385008662	0.00368525851770879	1	Gm34030	8	57784724	57787620	-	2026	lncRNA	predicted gene, 34030 [Source:MGI Symbol;Acc:MGI:5593189]	-	13	4	10	2	2	2	0	0	0	0	2	0	0.434120239923875	0.13375392597159	0.286371473490966	0.0549146727442927	0.0575860595067937	0.0612266777843	0	0	0	0	0.0612857038730419
ENSMUSG00000028517	6088.83394748722	5728.92756820399	6430.28870803379	5600.49268013763	6385.04769536439	6555.20800205184	4787.10103361476	4309.30428570174	5278.60781493339	5847.73877485609	4179.39937654262	5965.61389274747	6131.46643354647	5061.29419639935	0.277015192964568	0.0037328301497167	0.0525763989665372	Plpp3	4	105014544	105089961	+	3159	protein_coding	phospholipid phosphatase 3 [Source:MGI Symbol;Acc:MGI:1915166]	-	5720	5331	6945	6271	6925	6708	4895	5063	5381	5071	4303	5227	122.504636491845	114.326009447001	127.553335351623	110.429478203733	127.878330829897	131.702363338584	95.9083006227244	86.9878202467265	106.430758665197	116.249621219067	84.5649397767183
ENSMUSG00000063382	2119.38258556767	1965.52401467738	2091.57986917903	2229.12290378305	1822.85043952858	2280.83713130426	1588.20267182643	1686.95261589193	1814.79733462679	1879.67150522884	1215.06591216705	1926.5269276751	2084.88282400666	1685.20282790269	0.307464986193601	0.00374023293568453	0.0526203217824483	Bcl9l	9	44394122	44423193	+	7998	protein_coding	B cell CLL/lymphoma 9-like [Source:MGI Symbol;Acc:MGI:1933114]	-	1991	1829	2259	2496	1977	2334	1624	1982	1850	1630	1251	1688	16.8420899813104	15.4923854526047	16.3871725350863	17.3604519218506	14.4195622606046	18.099625632144	12.5677563003496	13.4500034964288	14.4525380149444	14.7588923974384	9.71056575984779
ENSMUSG00000026072	1190.09027155432	1523.84529951477	2219.35234458704	3060.57860226944	1191.26088410264	3186.72231584541	831.263713702256	682.611502495121	1117.32657521077	901.781053428804	483.695303164821	1852.34194527055	2061.97495297894	978.170015545386	1.07613326492029	0.0037616995902042	0.0528517122221126	Il1r1	1	40264240	40356417	+	6363	protein_coding	interleukin 1 receptor, type I [Source:MGI Symbol;Acc:MGI:96545]	-	1118	1418	2397	3427	1292	3261	850	802	1139	782	498	1623	11.8873760998548	15.0973351327263	21.8562327029168	29.9605668835647	11.8447908750988	31.7862295781726	8.26818391043305	6.84088976075257	11.1844747302246	8.9000488763803	4.8588785440278
ENSMUSG00000060519	197.99355143927	137.554441705142	221.287113206634	232.200302477401	281.218707160453	290.235059124835	150.605425776644	202.570495752916	158.917388221373	171.822732686562	125.294566482454	95.8698234151115	226.748195852289	150.84673872251	0.587107002363617	0.00376528645125782	0.0528517122221126	Tor3a	1	156481187	156501926	-	3892	protein_coding	torsin family 3, member A [Source:MGI Symbol;Acc:MGI:1353652]	-	186	128	239	260	305	297	154	238	162	149	129	84	3.23330173792303	2.22804073190907	3.56282314144282	3.71619386109759	4.57144832361678	4.732970068053	2.44906896505688	3.31897722559772	2.60073423586166	2.772432611147	2.05771632194694
ENSMUSG00000039483	133.060182418864	253.616001893855	227.768325727331	251.848020379335	216.676708795759	238.442270796161	173.098443912117	129.372753590098	163.822245882527	159.137832958024	118.495636518289	184.891802300572	220.235251668551	154.803119193605	0.51142509618912	0.00380711793221477	0.0533170153289188	Asb6	2	30713109	30720345	-	5439	protein_coding	ankyrin repeat and SOCS box-containing 6 [Source:MGI Symbol;Acc:MGI:1919573]	-	125	236	246	282	235	244	177	152	167	138	122	162	1.55488071563949	2.9395370081059	2.62412937859907	2.88421675016936	2.52043563079422	2.78240860476209	2.01422199091726	1.51678727323208	1.91845317752853	1.83741640441283	1.39254550447762
ENSMUSG00000049792	292.732401321501	344.960748338676	293.506338437251	291.143456183203	315.333763438935	292.189503967427	254.268900661867	223.84890917234	276.633972089057	228.328195113687	221.450861689918	251.087632753863	304.977701947832	242.603078580122	0.32989188795709	0.00381522245699383	0.0533329752868339	Bag5	12	111675922	111679691	-	2508	protein_coding	BCL2-associated athanogene 5 [Source:MGI Symbol;Acc:MGI:1917619]	-	275	321	317	326	342	299	260	263	282	198	228	220	7.41841773014315	8.67088623803025	7.33332487550977	7.23082603577741	7.95472885641573	7.39424431979796	6.41651097558036	5.69152127010864	7.02546974659988	5.71722415537837	5.64385618394467
ENSMUSG00000006262	865.423426452292	785.564819425457	772.190177465829	996.675144479922	906.35406274992	1162.89468134193	725.644324196558	680.05809288479	670.984528045798	773.778883440828	811.015217153866	748.697668575156	914.850385319225	735.029785716166	0.316392010507066	0.00383386734771308	0.0534902870088175	Mob1b	5	88868714	88912079	+	15033	protein_coding	MOB kinase activator 1B [Source:MGI Symbol;Acc:MGI:1915723]	-	813	731	834	1116	983	1190	742	799	684	671	835	656	3.65890396894899	3.29425874555112	3.21876735724146	4.12967982803199	3.81447407367894	4.90966029858579	3.05500111775955	2.88470407966872	2.84291736362961	3.2323949868919	3.44833493311593
ENSMUSG00000022905	633.366468313793	696.36936113228	801.818577560441	790.374106509616	806.774979558678	891.226848221716	586.774386142769	569.410343103785	608.202349983033	680.371894530683	602.19093968311	713.317138505294	769.988390216087	626.711175324779	0.298897018231818	0.00383691115899432	0.0534902870088175	Kpna1	16	35799120	35857501	+	8486	protein_coding	karyopherin (importin) alpha 1 [Source:MGI Symbol;Acc:MGI:103560]	-	595	648	866	885	875	912	600	669	620	590	620	625	4.74373108306019	5.17318448632894	5.92085001394621	5.80147050301934	6.01494738337665	6.6656414837488	4.37624218896886	4.27881231627952	4.56501757470082	5.03496604460613	4.53583539647686
ENSMUSG00000098021	20.2251477276673	11.8210848340356	13.8883125443494	14.2892493832247	0	14.6583363194361	6.84570117166564	0	0.980971532230699	2.30634540518876	0	0	12.4803551347855	1.68883635151418	2.88792917307798	0.00389349366795994	1	Gm9522	15	39043906	39044831	+	926	processed_pseudogene	predicted gene 9522 [Source:MGI Symbol;Acc:MGI:3779931]	-	19	11	15	16	0	15	7	0	1	2	0	0	1.3881894430661	0.804762417441374	0.939830354145837	0.96118468233207	0	1.00468614355555	0.467886138425357	0	0.0674749863075859	0.15641074003195	0
ENSMUSG00000027598	1341.24663878215	1412.08231562934	1611.04425514453	1795.98003185405	1470.63553416696	1695.48090094811	1185.28426000839	1321.81504161462	1311.55893859244	1284.63439069014	1289.85414177286	1425.49296958898	1554.41161275419	1303.10662371124	0.255046686179453	0.00389543103550626	0.0540206818138834	Itch	2	154975429	155068775	+	9709	protein_coding	itchy, E3 ubiquitin protein ligase [Source:MGI Symbol;Acc:MGI:1202301]	-	1260	1314	1740	2011	1595	1735	1212	1553	1337	1114	1328	1249	8.78015468334751	9.16868077506003	10.3978594418508	11.5222001419638	9.58325387343798	11.0834538750835	7.72647216556713	8.68154661542781	8.60420398578045	8.30918161655773	8.49165219230238
ENSMUSG00000038403	2550.49757660479	2316.93262747098	2167.50264442147	2208.58210779467	2222.08880084161	2165.52488559136	1785.75004849449	1829.94355407046	2069.84993300677	2248.68677005904	1851.25150167098	1823.80925973034	2271.85477378748	1934.88184450535	0.231764188474657	0.00390769796626416	0.0540206818138834	Hjv	3	96432488	96436526	+	2028	protein_coding	hemojuvelin BMP co-receptor [Source:MGI Symbol;Acc:MGI:1916835]	-	2396	2156	2341	2473	2410	2216	1826	2150	2110	1950	1906	1598	79.9327926028489	72.0222681045067	66.9734479778207	67.8350283583295	69.3227685679096	67.7722564613506	55.7296028596868	57.5401058051908	65.0082232479979	69.6328583026852	58.3476768996963
ENSMUSG00000030827	133.060182418864	96.7179668239277	114.810050366622	110.741682719991	126.317911085187	83.0639058101381	13.6914023433313	48.5147825962866	103.982982416454	81.8752618842009	14.5691356374946	54.7827562372066	110.785283204122	52.902720185829	1.06907774112924	0.00391894052240434	0.0540206818138834	Fgf21	7	45263310	45264914	-	951	protein_coding	fibroblast growth factor 21 [Source:MGI Symbol;Acc:MGI:1861377]	-	125	90	124	124	137	85	14	57	106	71	15	48	8.89274049670157	6.41132777646153	7.56502492705514	7.25335633307686	8.40362873229478	5.54355740338292	0.911172585030242	3.2530780674721	6.96432676762082	5.40661436074688	0.979217949895764
ENSMUSG00000112300	50.0306285894929	80.5983056866065	72.2192252306171	86.6285743857997	80.2164836818342	77.2005712823636	19.559146204759	61.281830647941	48.0676050793042	51.892771616747	27.1957198566566	46.7936042859473	74.4822981427857	42.4651129485592	0.811660519450701	0.00395087047805204	0.0543997659321022	Gm47976	10	78100365	78101909	-	1545	TEC	predicted gene, 47976 [Source:MGI Symbol;Acc:MGI:6097260]	-	47	75	78	97	87	79	20	72	49	45	28	41	2.05814276753952	3.28865842255389	2.92910752186604	3.49253764305951	3.2848653788953	3.1713833935561	0.801225268944762	2.52932222149492	1.98162461405851	2.10926716412017	1.1251182554401
ENSMUSG00000020386	5248.95807605935	4361.98030375914	5216.45019165765	5184.31829185121	4895.97159023609	4908.58822216851	2949.51924767765	3310.06999152559	4862.67588526757	4728.00808063695	3476.19576310621	4381.47919155492	4969.37777928866	3951.32469329482	0.330997527788977	0.00396506707436519	0.0545341028077864	Sar1b	11	51654514	51682752	+	1255	protein_coding	secretion associated Ras related GTPase 1B [Source:MGI Symbol;Acc:MGI:1913647]	-	4931	4059	5634	5805	5310	5023	3016	3889	4957	4100	3579	3839	265.825965406616	219.109553358735	260.460765117056	257.309809608978	246.818439576756	248.238759635997	148.744438653677	168.187751377416	246.790810836117	236.585265181394	177.046194506548
ENSMUSG00000042271	583.3358397243	583.531733171031	558.310164282847	626.940816688983	556.905243032504	552.130668032094	473.331338155167	487.701235573197	491.46673764758	472.800808063695	474.953821782324	526.142721361505	576.859077488627	487.732777097245	0.242559136529708	0.00398840271644085	0.0546713863429984	Nxt2	X	141009766	141022688	+	3176	protein_coding	nuclear transport factor 2-like export factor 2 [Source:MGI Symbol;Acc:MGI:2147914]	-	548	543	603	702	604	565	484	573	501	410	489	461	11.6736370891059	11.5825804102655	11.0155456231579	12.2957341215233	11.0938745848082	11.0336218187831	9.4323084321712	9.79206471652029	9.85623441364392	9.3486935706124	9.55865945007506
ENSMUSG00000055296	1163.47823507055	1106.88339809606	1189.76544129927	1379.80564356763	1113.81048606501	1263.54859073539	869.404048801536	847.731990629851	800.47277030025	1188.9210563748	888.717273887171	1169.84010714868	1202.88196580565	960.847874523716	0.325553080004962	0.00401273530125057	0.0548213737151941	Tmem245	4	56866923	56947437	-	17090	protein_coding	transmembrane protein 245 [Source:MGI Symbol;Acc:MGI:2445107]	-	1093	1030	1285	1545	1208	1293	889	996	816	1031	915	1025	4.32697336927465	4.08301664188113	4.3624479684091	5.0290304617906	4.12336403526632	4.6925250791092	3.21968084558799	3.16313277816853	2.98333406985329	4.36882012793863	3.32389774671756
ENSMUSG00000030257	78.7716279919675	92.4193905206421	73.1451127335737	108.062448460637	51.6335986917554	53.7472331712658	47.9199082016595	12.7670480516544	14.7145729834605	48.4332535089639	38.8510283666523	63.9132156100743	76.2965685949735	37.7665044537441	1.02266364651164	0.00402049202055664	0.0548343669822091	Srgap3	6	112694932	112924227	-	9852	protein_coding	SLIT-ROBO Rho GTPase activating protein 3 [Source:MGI Symbol;Acc:MGI:2152938]	-	74	86	79	121	56	55	49	15	15	42	40	56	0.508175168262181	0.591371017194121	0.465234468312252	0.683217233281181	0.331581606141027	0.34624891928058	0.307839824327361	0.0826355653718714	0.0951306901961396	0.308725461902283	0.252060162498544
ENSMUSG00000006777	265.055883378377	107.464407582142	155.549100496714	112.527838892894	208.378451863156	64.496679805519	82.1484140599877	113.201159391336	115.754640803222	34.5951810778314	77.7020567333046	65.0545230316828	152.2453936698	81.4093291828941	0.899009484125634	0.00402931376776685	0.0548647801504573	Krt23	11	99368800	99383963	-	1565	protein_coding	keratin 23 [Source:MGI Symbol;Acc:MGI:2148866]	-	249	100	168	126	226	66	84	133	118	30	80	57	10.7644322396342	4.32884111850545	6.22822272774269	4.47872140558213	8.42404938745453	2.61565062191868	3.32214106720931	4.61251133017291	4.71109060949348	1.3882077821366	3.17354213538103
ENSMUSG00000027597	46812.7011378751	47844.2288996454	47422.1061264326	55211.8734606073	46193.6302581597	54096.1015756684	30724.4848157456	39078.2318130405	40513.1433095956	41855.5564133656	39137.5547008563	51961.4442909904	49596.7735763981	40545.0692239324	0.290746229896396	0.00409863231000185	0.0554501170333276	Ahcy	2	154901230	154916417	-	2805	protein_coding	S-adenosylhomocysteine hydrolase [Source:MGI Symbol;Acc:MGI:87968]	-	43977	44521	51218	61822	50100	55357	31417	45913	41299	36296	40295	45528	1060.71535809225	1075.27124762522	1059.39750395299	1226.04957293292	1041.91350511484	1224.02368261421	693.242168520608	888.388549392165	919.942031911847	937.073081622971	891.839940910002
ENSMUSG00000035455	6.38688875610547	18.2689492889641	15.7400875502627	6.2515466051608	11.0643425768047	4.88611210647871	5.86774386142769	0	1.9619430644614	0	2.91382712749892	0	10.4329878139628	1.79058567556467	2.52281330819893	0.00411648283138547	1	Fignl1	11	11737431	11758962	-	4839	protein_coding	fidgetin-like 1 [Source:MGI Symbol;Acc:MGI:1890648]	-	6	17	17	7	12	5	6	0	2	0	3	0	0.0838883691244954	0.238001277036242	0.20382736701748	0.0804711602458731	0.144661322456	0.0640862002433312	0.0767447638263892	0	0.0258242766360093	0	0.0384887898471118
ENSMUSG00000073485	35.1278881585801	5.3732203791071	12.0365375384362	6.2515466051608	2.76608564420118	15.6355587407319	4.88978655118974	0	1.9619430644614	5.76586351297189	0	0	12.8651395110362	2.10293218810384	2.6324753613443	0.0041591513999473	1	H3f3aos	1	180641341	180644424	+	3044	lncRNA	H3.3 histone A, opposite strand [Source:MGI Symbol;Acc:MGI:3802006]	-	33	5	13	7	3	16	5	0	2	5	0	0	0.733458278601801	0.111278520868282	0.24778094181357	0.12792376623843	0.0574914700529389	0.326005911145839	0.101666642618237	0	0.0410524555327362	0.118952320359383	0
ENSMUSG00000117767	23.4185921057201	6.44786445492852	22.2213000709591	16.9684836425793	12.9083996729388	16.6127811620276	6.84570117166564	0	9.80971532230699	4.61269081037751	0	3.42392226482541	16.4295701848589	4.11533826152926	2.00820954820274	0.00417378422708162	1	Gm18786	18	75069351	75071391	+	1236	processed_pseudogene	predicted gene, 18786 [Source:MGI Symbol;Acc:MGI:5010971]	-	22	6	24	19	14	17	7	0	10	4	0	3	1.20423247036887	0.328865842255389	1.12657981610232	0.855131639408901	0.660748783111123	0.853061988773003	0.350536055163334	0	0.505516483178192	0.234363018235575	0
ENSMUSG00000045817	1589.27081881091	1277.75180615167	1583.26763005584	1756.68459605019	1513.97087592611	2127.41321116083	1477.69349576954	1490.34007589645	1157.54640803222	1138.18145746065	1316.07858592035	1250.87293408288	1641.39315635926	1305.11882619368	0.330469971073235	0.0042135226036621	0.0564345524734765	Zfp36l2	17	84491359	84495375	-	3530	protein_coding	zinc finger protein 36, C3H type-like 2 [Source:MGI Symbol;Acc:MGI:107945]	zf-CCCH	1493	1189	1710	1967	1642	2177	1511	1751	1180	987	1355	1096	28.6148336431915	22.8188176223744	28.1054536841505	30.9975593157983	27.1347143729142	38.2502135253243	26.493716490442	26.9222645546077	20.8862798976127	20.2483672494449	23.8305032356077
ENSMUSG00000029313	655.720578960162	682.398988146601	755.524202412609	829.669542313484	705.351839271301	961.58686255501	630.782465103477	648.566041024043	550.325029581422	669.993340207334	638.128140922264	559.24063658815	765.042002276528	616.172608904448	0.31250551286083	0.00421983639035278	0.0564575496147198	Aff1	5	103840240	104003188	+	9458	protein_coding	AF4/FMR2 family, member 1 [Source:MGI Symbol;Acc:MGI:1100819]	AF-4	616	635	816	929	765	984	645	762	561	581	657	490	4.40643659701055	4.54841835752035	5.00564497693847	5.4640447750244	4.71833673974331	6.4527661875627	4.22098229612592	4.37276168050526	3.7061017907573	4.44861052028067	4.31255536491522
ENSMUSG00000031555	1189.02579009497	1386.29085780963	1518.45550484887	1538.77354295601	1421.76802111941	1697.4353457907	1134.43047987602	1237.5525244737	1392.97957576759	1142.79414827103	1169.41595383623	1189.24233331603	1458.62484376993	1211.06916925677	0.268439165130949	0.00424131702756619	0.0566557311582008	Adam9	8	25439627	25506943	-	4115	protein_coding	a disintegrin and metallopeptidase domain 9 (meltrin gamma) [Source:MGI Symbol;Acc:MGI:105376]	-	1117	1290	1640	1723	1542	1737	1160	1454	1420	991	1204	1042	18.3649375829107	21.2376206369252	23.1229480602679	23.2923486982298	21.8595562353218	26.180631572874	17.4478241434119	19.1776202174728	21.5611686501995	17.4401966175163	18.1645762576338
ENSMUSG00000027582	440.695324171278	528.724885304138	449.981326436922	547.456866994796	615.915070108796	484.702320962688	470.397466224453	388.118260770293	416.912901198047	396.691409692466	342.860325335706	424.566360838351	511.245965663103	406.591120676553	0.33122820290731	0.00424387499312366	0.0566557311582008	Zgpat	2	181006721	181025421	+	5624	protein_coding	zinc finger, CCCH-type with G patch domain [Source:MGI Symbol;Acc:MGI:2449939]	-	414	492	486	613	668	496	481	456	425	344	353	372	4.98036476802043	5.92660221270772	5.01372087788497	6.063355159913	6.92879891381494	5.46998965138087	5.2936215548538	4.40067886510096	4.72168934234538	4.42956105732018	3.89670938162467
ENSMUSG00000006731	2055.51369800661	1589.39858813988	1891.58816854039	1742.39534666696	2043.21526251661	2020.89596723959	1620.47526306428	1646.09806212664	1749.07224196734	1479.52057742859	1503.53479778944	1601.25431251668	1890.50117185167	1599.99254248216	0.240541424395872	0.00426775706035179	0.0569126951305545	B4galnt1	10	127001094	127008199	+	3454	protein_coding	beta-1,4-N-acetyl-galactosaminyl transferase 1 [Source:MGI Symbol;Acc:MGI:1342057]	-	1931	1479	2043	1951	2216	2068	1657	1934	1783	1283	1548	1403	37.8238788328276	29.0089379337923	34.317467302055	31.4219245422492	37.4260703732851	37.1345650444371	29.6929468462807	30.3902507458883	32.2539420796265	26.8999755328428	27.8238515055616
ENSMUSG00000028158	6364.5346454591	5546.23807531435	6189.55795726506	6953.50598111172	6578.67369045847	6500.48354645927	4455.57350544409	4360.37247790836	6290.97043619547	5524.85041812967	4699.03188094659	5998.71180797412	6355.498982678	5221.58508776638	0.283755873044306	0.00431225496075369	0.0574437260607123	Mttp	3	137795615	137850729	-	6206	protein_coding	microsomal triglyceride transfer protein [Source:MGI Symbol;Acc:MGI:106926]	-	5979	5161	6685	7786	7135	6652	4556	5123	6413	4791	4838	5256	65.1812830856842	56.3388627211236	62.496951762515	69.7911690836118	67.067020549553	66.4799385770608	45.438613379049	44.8035814565878	64.5659076278517	55.9064558642107	48.3974763772426
ENSMUSG00000042275	59.6109617236511	69.8518649283923	30.5542875975688	71.4462469161235	70.0741696530966	70.3600143332934	26.4048473764246	28.0875057136396	49.0485766115349	32.2888356726426	34.9659255299871	42.2283745995134	61.9829241920209	35.5040109172904	0.805807395199752	0.00431954859913117	0.0574785437643869	Pelo	13	115224891	115226722	-	1600	protein_coding	pelota mRNA surveillance and ribosome rescue factor [Source:MGI Symbol;Acc:MGI:2145154]	-	56	65	33	80	76	72	27	33	50	28	36	37	2.36795893946169	2.75219601737479	1.19663899841619	2.78142817449843	2.77089721831815	2.79101810679732	1.04447225293846	1.11942268631006	1.95255741627577	1.26731802110887	1.39685440552631
ENSMUSG00000041920	226.734550841744	163.345899524856	196.288150626805	150.930196610311	221.286851536094	208.148375735993	165.274785430213	176.18526311283	127.526299189991	141.840242419109	93.2424680799655	102.717667944762	194.455670812634	134.464454362812	0.529615940524525	0.00434400785990453	0.0575581169058441	Slc16a6	11	109341681	109364424	-	4883	protein_coding	solute carrier family 16 (monocarboxylic acid transporters), member 6 [Source:MGI Symbol;Acc:MGI:2144585]	-	213	152	212	169	240	213	169	207	130	123	96	90	2.95120244641959	2.10883621804234	2.51894295150628	1.92529740524364	2.86715600804663	2.70547184903556	2.14216592103033	2.30082595588833	1.66345256025132	1.82417268770827	1.22054313541789
ENSMUSG00000033917	1654.20418783132	1627.01113079363	1897.14349355813	2361.29846057788	1776.74901212522	2324.81214026257	1050.32615119556	1377.13891650512	1560.72570777904	1794.33672523685	1022.75332175212	1878.59201596754	1940.20307085813	1447.31213973937	0.423506507507484	0.00437016917428376	0.0577862502130486	Gde1	7	118287768	118305001	-	1692	protein_coding	glycerophosphodiester phosphodiesterase 1 [Source:MGI Symbol;Acc:MGI:1891827]	-	1554	1514	2049	2644	1927	2379	1074	1618	1591	1556	1053	1646	62.1379296170799	60.6193820011701	70.2604286196652	86.9278498034733	66.4367169304351	87.205569688348	39.2877401157835	51.9013083014448	58.7521295374892	66.5973266074098	38.6363984507276
ENSMUSG00000078588	25.5475550244219	9.67179668239277	20.3695250650458	38.4023577174164	5.53217128840236	5.86333452777445	4.88978655118974	0	8.82874379007629	8.07220891816065	1.94255141833261	1.14130742160847	17.5644567175756	4.14576634989463	2.09697121407457	0.00437087758782771	1	Ccdc24	4	117723721	117729754	-	4491	protein_coding	coiled-coil domain containing 24 [Source:MGI Symbol;Acc:MGI:2685874]	-	24	9	22	43	6	6	5	0	9	7	2	1	0.361554948290744	0.135764255520261	0.284216194977496	0.532627083070284	0.0779354419243581	0.0828625579098142	0.0689096548942139	0	0.125214102847344	0.112876243251736	0.0276474807496733
ENSMUSG00000026663	1310.37667646097	1285.27431468242	1360.12874184329	1456.61035900247	1367.36833678345	1493.19585973989	1137.36435180673	1029.87520950012	1304.69213786683	1134.72193935287	1280.14138468119	1153.86180324616	1378.82571475208	1173.44280440898	0.233105787653401	0.00437090265819265	0.0577862502130486	Atf6	1	170532243	170695340	-	9231	protein_coding	activating transcription factor 6 [Source:MGI Symbol;Acc:MGI:1926157]	TF_bZIP	1231	1196	1469	1631	1483	1528	1163	1210	1330	984	1318	1011	9.02226180255148	8.77745106180412	9.23298733804541	9.82885787586813	9.371717895115	10.2665551274962	7.79801541612156	7.11437521361246	9.00236633481709	7.71958421326357	8.86411298394864
ENSMUSG00000008153	421.534657902961	373.976138385854	292.580450934295	292.929612356106	425.977189206982	196.421706680444	173.098443912117	146.395484325637	315.872833378285	330.960565644587	144.72008066578	151.793887073927	333.903292577774	210.473549166722	0.66684704143355	0.00441974009569485	0.0580547081745466	Clstn3	6	124407540	124441753	-	5867	protein_coding	calsyntenin 3 [Source:MGI Symbol;Acc:MGI:2178323]	-	396	348	316	328	462	201	177	172	322	287	149	133	4.56651849339809	4.01836279181939	3.12492925298265	3.10996571070559	4.59359491486901	2.12485896432498	1.86728368989244	1.59115506491123	3.42920600260874	3.54252864260874	1.57666273827941
ENSMUSG00000018362	596.109617236511	658.75681847853	786.078490010178	835.921088918645	767.127751991794	794.481828513438	478.221124706357	403.438718432278	649.403154336723	622.713259400964	451.643204762333	737.284594359072	739.745932524849	557.117342666288	0.411096373131661	0.00442331317166649	0.0580547081745466	Kpna2	11	106879455	106890367	-	2873	protein_coding	karyopherin (importin) alpha 2 [Source:MGI Symbol;Acc:MGI:103561]	-	560	613	849	936	832	813	489	474	662	540	465	646	13.1873801014226	14.4547583809001	17.1451488302645	18.1233329017092	16.8933004974862	17.5511290623523	10.5348015456685	8.95453137674215	14.3971375935906	13.6114908537376	10.0481463212242
ENSMUSG00000022809	3299.89252398783	3256.1715497389	3372.08228576804	3307.06815413006	2654.52018988507	3414.41514000732	1584.29084258548	2029.10950367627	3116.54655789693	2775.68669514467	1850.28022596181	3148.86717621777	3217.35830725287	2417.46350024716	0.412683490781374	0.00443509865376459	0.0580547081745466	Nr1i2	16	38068685	38115186	-	2553	protein_coding	nuclear receptor subfamily 1, group I, member 2 [Source:MGI Symbol;Acc:MGI:1337040]	THR-like	3100	3030	3642	3703	2879	3494	1620	2384	3177	2407	1905	2759	82.1517845932656	80.4040271911355	82.7672111428125	80.6864749719363	65.7836031215119	84.8832942955984	39.2751023431619	50.6822145623221	77.7535437400155	68.276749522893	46.3247185015905
ENSMUSG00000052676	193.735625601866	192.361289572034	209.250575668198	251.848020379335	211.144537507357	196.421706680444	147.67155384593	168.525034281838	169.708075075911	162.597351065807	164.145594849106	157.500424181969	209.126959234872	161.691338883427	0.372164634495213	0.00443973624103932	0.0580547081745466	Zmat1	X	133872121	133909958	-	5391	protein_coding	zinc finger, matrin type 1 [Source:MGI Symbol;Acc:MGI:2442284]	zf-C2H2	182	179	226	282	229	201	151	198	173	141	169	138	2.28406352906711	2.24941551981548	2.43225050632813	2.90989703286424	2.47795238846364	2.31247403889718	1.73364727433193	1.99340712086376	2.00507472760205	1.8940757450391	1.94619340492546
ENSMUSG00000103928	102.190220097688	75.2250853074994	95.3664128045328	116.100151238701	94.0469119028401	81.1094609675466	54.7656093733251	36.5988710814092	46.1056620148428	88.7942980997671	73.8169538966393	54.7827562372066	94.0063737198012	59.1440251171984	0.675473725113217	0.00448751890422675	0.0585714210220117	Gm37893	1	151321056	151323492	+	2437	TEC	predicted gene, 37893 [Source:MGI Symbol;Acc:MGI:5611121]	-	96	70	103	130	102	83	56	43	47	77	76	48	2.66515104271437	1.9459357592625	2.45217178273073	2.96746543032249	2.44158275937586	2.11238319303495	1.42228170433116	0.9576638044557	1.20502517606842	2.28814086700001	1.93609510454565
ENSMUSG00000117743	12.7737775122109	16.1196611373213	14.8142000473061	15.1823274696762	6.45419983646942	3.90888968518297	0	0	0	2.30634540518876	7.77020567333046	2.28261484321694	11.5421759480278	2.05986098695603	2.49916617350592	0.00448900837767565	1	Gm50232	19	7341880	7347605	+	1404	lncRNA	predicted gene, 50232 [Source:MGI Symbol;Acc:MGI:6303036]	-	12	15	16	17	7	4	0	0	0	2	8	2	0.578256151272697	0.723785934878314	0.661183595775153	0.673565227442639	0.290842413078828	0.176702634175202	0	0	0	0.103159790078052	0.353745971643256
ENSMUSG00000040560	397.05158433789	351.408612793604	425.908251360049	463.507526868351	490.519187571676	483.725098541392	380.425393682562	352.370526225661	328.625463297284	378.240646450956	311.779502642385	336.685689374499	435.35337691216	348.021203612224	0.324445617034419	0.00449502638847088	0.0586071274980885	Wdr7	18	63841756	64122847	+	10188	protein_coding	WD repeat domain 7 [Source:MGI Symbol;Acc:MGI:1860197]	-	373	327	460	519	532	495	389	414	335	328	321	295	2.47700006848172	2.17442686160262	2.61961875181233	2.83384613773986	3.04613749952525	3.01346674271403	2.36327244190296	2.20552279988275	2.05451663746331	2.33148416020926	1.95607147482417
ENSMUSG00000034390	765.362169273306	850.043463974743	997.180840684289	835.028010832193	996.712860460492	1181.46190734655	664.033013651567	812.835392621996	772.02459586556	774.932056143422	780.905670169711	732.719364672638	937.631542095262	756.241682187482	0.310318558441926	0.00451971843924332	0.0588042180834602	Cmip	8	117983803	118186169	+	6495	protein_coding	c-Maf inducing protein [Source:MGI Symbol;Acc:MGI:1921690]	-	719	791	1077	935	1081	1209	679	955	787	672	804	642	7.48955230385113	8.25055789563459	9.62067941339853	8.00811499047276	9.70897416798968	11.5450890124641	6.47058794852077	7.98039454443635	7.5709324051561	7.49268853126723	7.68502911328818
ENSMUSG00000086844	23.4185921057201	29.0153900471783	16.6659750532193	11.6100151238701	23.0507137016765	2.93166726388722	0	0.851136536776959	8.82874379007629	10.3785543233494	2.91382712749892	3.42392226482541	17.7820588825919	4.39936400708783	2.03370629687106	0.00452929779146196	1	B230206H07Rik	7	140939054	140945104	-	4747	lncRNA	RIKEN cDNA B230206H07 gene [Source:MGI Symbol;Acc:MGI:2444929]	-	22	27	18	13	25	3	0	1	9	9	3	3	0.313551997761938	0.38532795757836	0.219999892464052	0.152342811327068	0.307218655363293	0.039196939917103	0	0.0114335452572667	0.118461456896444	0.13730009557892	0.0392347280535442
ENSMUSG00000058624	1181.57441987951	1081.09194027635	1196.24665381996	1187.79385498055	1083.3835439788	1386.67861581866	822.462097910115	714.954690892645	833.825802396094	1085.13551314131	1067.43200437377	1125.32911770595	1186.12817145897	941.523204403315	0.334353258621549	0.00457744633524714	0.0594922707825454	Gda	19	21368671	21450809	-	6235	protein_coding	guanine deaminase [Source:MGI Symbol;Acc:MGI:95678]	-	1110	1006	1292	1330	1175	1419	841	840	850	941	1099	986	12.044607275988	10.9306883216741	12.0225128795215	11.8662372801376	10.9933034449798	14.1154938734577	8.34858097094653	7.31211436125836	8.51797301085819	10.9295108980497	10.9428351896884
ENSMUSG00000037270	714.267059224462	622.218919900602	790.707927524961	765.367920088973	742.232981193983	825.752945994902	600.465788486101	553.238748905023	506.181310631041	663.074303991768	685.720650671413	633.425618992701	743.424625654647	607.017736946341	0.2938096412875	0.00460307499866649	0.0596179115947851	4932438A13Rik	3	36917253	37107182	+	32279	protein_coding	RIKEN cDNA 4932438A13 gene [Source:MGI Symbol;Acc:MGI:2444631]	-	671	579	854	857	805	845	614	650	516	575	706	555	1.40639907270875	1.21519081970226	1.5349951018308	1.47692552157449	1.45479773275837	1.62362891611246	1.17733871383728	1.09293272928403	0.998811241288313	1.29001670637274	1.35785455325488
ENSMUSG00000026116	793.03868721643	924.193905206421	1089.76959097995	1112.77529571862	979.194318047218	1221.52802661968	772.58627508798	649.417177560819	989.800276020775	851.041454514651	778.963118751378	805.76303965558	1020.08330396472	807.928556931864	0.33732741906054	0.00461345629174978	0.0596388996896297	Tmem131	1	36831272	36982747	-	9413	protein_coding	transmembrane protein 131 [Source:MGI Symbol;Acc:MGI:1927110]	-	745	860	1177	1246	1062	1250	790	763	1009	738	802	706	5.35469004841014	6.18951159183733	7.25466895176356	7.3635599817806	6.58147544181087	8.23629881486985	5.19460056310703	4.39943216971795	6.69756441694592	5.67774475772623	5.28950379844469
ENSMUSG00000074746	501.37076735428	637.263936962102	686.082639690862	693.028595086398	614.993041560729	833.570725365268	553.523837594679	399.183035748394	500.295481437656	483.179362387045	494.37933596565	635.708233835918	661.05161766994	511.044881161557	0.372795276662555	0.00462442692261661	0.0596388996896297	Pdzd8	19	59285610	59334212	-	5982	protein_coding	PDZ domain containing 8 [Source:MGI Symbol;Acc:MGI:2677270]	-	471	593	741	776	667	853	566	469	510	419	509	557	5.32697454499908	6.71574616486691	7.18688994520041	7.21627637382407	6.50438489017299	8.84408204278804	5.85629773432068	4.25526470222316	5.32693698321974	5.07241964794017	5.28250598025848
ENSMUSG00000028011	20583.8779794686	24268.6871642751	28527.5198535967	30219.0832112609	21247.2258616573	30504.9751031679	17186.6217701217	21293.733877086	23131.3087299999	20584.1327413097	22430.6412274867	21159.839596621	25891.8948622377	20964.3796571042	0.304576303535422	0.00462760441459314	0.0596388996896297	Tdo2	3	81864397	81883509	-	3881	protein_coding	tryptophan 2,3-dioxygenase [Source:MGI Symbol;Acc:MGI:1928486]	-	19337	22583	30811	33837	23044	31216	17574	25018	23580	17850	23094	18540	337.094430834253	394.20668050106	460.607861831314	485.004819069844	346.370607135564	498.865820503221	280.272253209127	349.871923245086	379.624252518692	333.075078982491	369.423180064984
ENSMUSG00000020475	18.0961848089655	16.1196611373213	9.25887502956629	8.03770277806389	14.752456769073	20.5216708472106	4.88978655118974	4.25568268388479	6.86680072561489	5.76586351297189	4.85637854583153	3.42392226482541	14.4644252283668	5.00973904738638	1.52528912572337	0.00463349894125711	1	Pgam2	11	5751640	5753733	-	840	protein_coding	phosphoglycerate mutase 2 [Source:MGI Symbol;Acc:MGI:1933118]	-	17	15	10	9	16	21	5	5	7	5	5	3	1.36922795819214	1.20975649115375	0.690700720586544	0.596020323106806	1.11113672915013	1.5505656148874	0.368420547773708	0.323065710334792	0.520681977673538	0.431060551397575	0.369538202520187
ENSMUSG00000001229	1232.66952992836	908.074244069099	1304.57549166589	1336.93789541796	1301.90430987069	1638.80200051296	1052.28206581603	1225.63661295882	947.618500134855	959.439688558523	883.860895341339	1011.1983755451	1287.16057857749	1013.33935639245	0.345003867428483	0.00463615668999718	0.0596388996896297	Dpp9	17	56493807	56525905	-	7883	protein_coding	dipeptidylpeptidase 9 [Source:MGI Symbol;Acc:MGI:2443967]	-	1158	845	1409	1497	1412	1677	1076	1440	966	832	910	886	9.93855295082235	7.26191515430618	10.37023651982	10.5639933457418	10.4488856694024	13.1944616829439	8.44838837751587	9.91450674162032	7.65666051654402	7.64327281899626	7.16668786011495
ENSMUSG00000025533	20515.7511660701	19085.6787865884	19114.9474985396	20511.3244115326	18976.2695477682	18925.8666332346	11930.1012275927	13099.8424375342	16756.9557135648	19658.1350611264	13249.1719487376	19176.2472978655	19521.6396739556	15645.0756144035	0.319451880281794	0.00464091451383997	0.0596388996896297	Asl	5	130040099	130058088	-	4831	protein_coding	argininosuccinate lyase [Source:MGI Symbol;Acc:MGI:88084]	-	19273	17760	20645	22967	20581	19367	12199	15391	17082	17047	13641	16802	269.909646865454	249.053077176957	247.940255770394	264.463096185905	248.517080043168	248.64255237859	156.293285047602	172.913916461219	220.930396421926	255.53976172745	175.298336629493
ENSMUSG00000050777	1794.71574046564	1289.5728909857	1719.37309299046	1586.99975962439	1744.47801294288	1604.59921576761	787.255634741549	1200.10251685551	1565.6305654402	1519.88162201939	936.30978363632	1326.19922390904	1623.28978546278	1222.56322443367	0.409487453755944	0.00464214200482706	0.0596388996896297	Tmem37	1	119995107	120001804	-	1311	protein_coding	transmembrane protein 37 [Source:MGI Symbol;Acc:MGI:2157899]	-	1686	1200	1857	1777	1892	1642	805	1410	1596	1318	964	1162	87.0083637775398	62.0104013772176	82.1823218938626	75.4019506648925	84.1870414237092	77.6820362973336	38.0054880861299	58.373612100767	76.0648454340472	72.8048447998907	45.6502295763153
ENSMUSG00000097025	0	6.44786445492852	0	13.3961712967731	4.6101427403353	7.81777937036593	0	0	0.980971532230699	0	0	0	5.37865964373382	0.163495255371783	4.38107683026838	0.00465071305488165	1	Gm26558	2	70491493	70492453	-	961	lncRNA	predicted gene, 26558 [Source:MGI Symbol;Acc:MGI:5477052]	-	0	6	0	15	5	8	0	0	1	0	0	0	0	0.422974173806099	0	0.868291833870477	0.303510292821967	0.51631737436417	0	0	0.0650175206252076	0	0
ENSMUSG00000046962	252.282105866166	206.331662557712	232.397763242114	322.401189209007	274.764507323984	311.733952393342	190.7016754964	212.78413419424	197.17527797837	244.472612950008	122.380739354955	182.609187457355	266.651863432054	191.687271238555	0.477924207376921	0.00466878840994011	0.0599185572109556	Zbtb21	16	97744557	97763822	-	6335	protein_coding	zinc finger and BTB domain containing 21 [Source:MGI Symbol;Acc:MGI:1927240]	ZBTB	237	192	251	361	298	319	195	250	201	212	126	160	2.53109152622583	2.05324416620129	2.2987741109466	3.16999391000452	2.74407799961387	3.12315978626096	1.90520239069718	2.14187211271686	1.98245450694329	2.42346528785731	1.23478842477464
ENSMUSG00000027806	485.403545464016	471.768749285603	530.533539194148	632.299285207693	528.322358042425	732.916815971806	362.822162098279	323.431883975244	536.591428130192	523.540406977848	343.831601044873	424.566360838351	563.540715527615	419.130640510798	0.428848718521062	0.00469361856988473	0.0600656700987505	Tsc22d2	3	58322136	58374204	+	11244	protein_coding	TSC22 domain family, member 2 [Source:MGI Symbol;Acc:MGI:1919283]	TSC22	456	439	573	708	573	750	371	380	547	454	354	372	2.74378532396842	2.64502433106758	2.95667085407964	3.50275906713783	2.9727650884613	4.13704806533457	2.04223727335821	1.83426849411003	3.03962691341969	2.92403507436818	1.95456919070443
ENSMUSG00000020358	1702.10585350211	1905.34394643138	1749.92738058803	2047.82805223339	1877.25012386453	1793.20314307769	1495.29672735382	1532.04576619853	1546.01113479558	1706.69559983968	1719.15800522436	1585.27600861416	1845.94308328285	1597.41387367102	0.209095905225026	0.00470002257437264	0.0600683426206502	Hnrnpab	11	51490927	51497674	-	2782	protein_coding	heterogeneous nuclear ribonucleoprotein A/B [Source:MGI Symbol;Acc:MGI:1330294]	-	1599	1773	1890	2293	2036	1835	1529	1800	1576	1480	1770	1389	38.8863751073149	43.1755221041243	39.416120201409	45.8505737176484	42.6920938097979	40.9099626645345	34.0175855311746	35.1168478811075	35.3958934642773	38.5258430983081	39.4988784692318
ENSMUSG00000086003	161.801181821339	56.9561360185352	99.0699628163593	112.527838892894	177.951509776943	136.811138981404	40.0962497197559	22.9806864929779	65.7250926594568	115.317270259438	66.0467482233089	85.5980566206353	124.186294717912	65.9606839959288	0.919384614843076	0.00473797140541951	0.0604275854635124	B230206L02Rik	11	94024244	94046605	+	3206	lncRNA	RIKEN cDNA B230206L02 gene [Source:MGI Symbol;Acc:MGI:1924598]	-	152	53	107	126	193	140	41	27	67	100	68	75	3.20764422777094	1.11994924071876	1.93637494592385	2.18627542100313	3.51172579791445	2.70841155438847	0.791541089540018	0.45708860326844	1.3057651592312	2.25883258374275	1.31678241596713
ENSMUSG00000022828	259.733476081623	212.779527012641	216.657675691851	278.640362972882	218.520765891893	201.307818786923	221.996309424014	176.18526311283	123.602413061068	139.53389701392	113.639257972458	202.011413624699	231.273271072969	162.828092368165	0.506582477564154	0.0047455759567643	0.0604391037481521	Gtf2e1	16	37330152	37360151	-	6285	protein_coding	general transcription factor II E, polypeptide 1 (alpha subunit) [Source:MGI Symbol;Acc:MGI:1921447]	-	244	198	234	312	237	206	227	207	126	121	117	177	2.62658020788114	2.13425297914285	2.16012941350026	2.76151341429915	2.19973249840104	2.03288156987624	2.23549498964171	1.78757886119375	1.25261917301892	1.39420825597612	1.155710884445
ENSMUSG00000056468	1.06448145935091	0	8.33298752660966	1.78615617290309	11.9863711248718	2.93166726388722	0	0	0	0	0	0	4.35027725793711	0	4.55840085535381	0.00475292670017063	1	5730596B20Rik	6	52154135	52157831	+	3697	TEC	RIKEN cDNA 5730596B20 gene [Source:MGI Symbol;Acc:MGI:1924830]	-	1	0	9	2	13	3	0	0	0	0	0	0	0.018300235244497	0	0.141241478161598	0.030093894233145	0.205125998822009	0.0503294221764912	0	0	0	0	0
ENSMUSG00000026915	964.420202171926	832.8491587616	854.594165228969	1040.43597071605	924.794633711261	914.680186332814	710.974964542989	762.618336952155	722.976019254025	809.527237221254	670.180239324752	909.622015021951	921.96238615377	764.316468719521	0.271766744968027	0.00475855832311212	0.0604391037481521	Strbp	2	37373240	37593871	-	18616	protein_coding	spermatid perinuclear RNA binding protein [Source:MGI Symbol;Acc:MGI:104626]	-	906	775	923	1165	1003	936	727	896	737	702	690	797	3.29266805689774	2.82033904791969	2.87663344802943	3.48126753684	3.14297820773653	3.1184559852484	2.41713644300008	2.61229239607196	2.47363096827716	2.73085287868631	2.30107802084981
ENSMUSG00000031298	45.7727027520892	26.8661018955355	58.3309126862676	27.6854206799978	36.8811419226824	73.2916815971806	7.82365848190359	22.1295499562009	31.3910890313824	23.0634540518876	11.6553085099957	29.6739929618202	44.8046602556255	20.9561754988651	1.1005490677488	0.00476501491937638	0.0604585880576247	Adgrg2	X	159173686	159281066	+	5278	protein_coding	adhesion G protein-coupled receptor G2 [Source:MGI Symbol;Acc:MGI:2446854]	-	43	25	63	31	40	75	8	26	32	20	12	26	0.551194902814122	0.320890315955903	0.69253281798863	0.326730857936534	0.442096841836923	0.881337030061045	0.0938153118999362	0.267364725794311	0.37882129485911	0.274415205133735	0.141149870458639
ENSMUSG00000042363	362.988177638661	407.290104736318	452.758988945792	535.846851870926	399.238361313037	671.351803430175	229.819967905918	314.069382070698	395.331527488972	476.260326171478	267.100820020734	309.294311255895	471.579047989151	331.979389152283	0.507909203085076	0.0047910671628402	0.0607264054633677	Lgalsl	11	20773576	20781056	-	4115	protein_coding	lectin, galactoside binding-like [Source:MGI Symbol;Acc:MGI:1916114]	-	341	379	489	600	433	687	235	369	403	413	275	271	5.60648497383397	6.239580016585	6.89458634236036	8.11109066682409	6.13825411796	10.3546884804631	3.5346885118119	4.86694763428298	6.11912039861295	7.26821513928782	4.14888577313065
ENSMUSG00000043432	95.8033313415821	130.031933174392	62.0344626980941	67.8739345703173	83.9045978741025	52.7700107499701	35.2064631685662	61.281830647941	50.0295481437656	46.1269081037751	36.9084769483197	61.6306007668574	82.069711734743	48.5306379632042	0.755168259914075	0.00480639310540876	0.0608578557944644	Leng9	7	4150914	4153373	-	2460	protein_coding	leukocyte receptor cluster (LRC) member 9 [Source:MGI Symbol;Acc:MGI:2444509]	-	90	121	67	76	91	54	36	72	51	40	38	54	2.47521840361849	3.33223983091782	1.5801884778297	1.71860602651935	2.15790883069706	1.3614722472182	0.905775395502189	1.58853773667059	1.29535516396831	1.17753126235435	0.958996701174339
ENSMUSG00000037982	29.8054808618255	29.0153900471783	49.997925159658	42.8677481496741	45.1793988552859	41.0433416944212	18.581188894521	33.1943249343014	15.6955445156912	23.0634540518876	10.6840328008294	21.6848410105609	39.6515474613405	20.4838977012986	0.952584750979122	0.00483757250599018	0.0611266106158141	Gm9725	8	81740205	81787824	+	5266	lncRNA	predicted gene 9725 [Source:MGI Symbol;Acc:MGI:3646552]	-	28	27	54	48	49	42	19	39	16	20	11	19	0.359735501627299	0.347351275090102	0.594952234823502	0.507058687337351	0.542802741310049	0.49467342062492	0.223319101498989	0.401960982550999	0.189842270629167	0.275040534123785	0.129682225267244
ENSMUSG00000028185	595.04513577716	407.290104736318	557.384276779891	539.419164216732	525.556272398224	521.836772971926	356.954418236851	429.823951072364	434.5703887782	450.890526714402	395.309213630687	462.22950575143	524.421954480042	421.629667363989	0.315945621054809	0.00484407345211958	0.0611458480359021	Dnase2b	3	146286740	146321351	-	2790	protein_coding	deoxyribonuclease II beta [Source:MGI Symbol;Acc:MGI:1913283]	-	559	379	602	604	570	534	365	505	443	391	407	405	13.5554433912861	9.20282142231085	12.5187648883944	12.0428861462154	11.9178374981426	11.8709969655895	8.0973290284888	9.82397665405153	9.92095123051084	10.1489267025821	9.05646743208613
ENSMUSG00000017774	1021.90220097688	901.626379614171	849.964727714186	993.102832134116	1026.21777399864	1044.65076836515	815.616396738449	908.162684741015	824.016087073787	815.293100734226	812.957768572199	784.078198645019	972.910780467189	826.687372750782	0.234316003830742	0.00485012471794019	0.0611593755500426	Myo1c	11	75541330	75564736	+	6585	protein_coding	myosin IC [Source:MGI Symbol;Acc:MGI:106612]	-	960	839	918	1112	1113	1069	834	1067	840	707	837	687	9.86328487637803	8.63161715723128	8.08827850658612	9.39391990901215	9.85975655672972	10.0686690497472	7.83904932265296	8.79445208379249	7.97034826871566	7.77519332616529	7.89111372598005
ENSMUSG00000037857	641.8823199886	588.904953550138	644.417702057814	807.342590152195	605.772756080058	770.051267981044	571.127069178962	529.406925875268	613.107207644187	562.748278866057	502.149541638981	525.001413939896	676.395264968308	550.590072857225	0.297508628071695	0.00486510276704175	0.0612853253177505	Nufip2	11	77576981	77632747	+	5792	protein_coding	nuclear fragile X mental retardation protein interacting protein 2 [Source:MGI Symbol;Acc:MGI:1915814]	-	603	548	696	904	657	788	584	622	625	488	517	460	7.043603198971	6.40970428185884	6.97187964923545	8.682358666252	6.61703791958063	8.43816094289551	6.24075911311706	5.82856948673074	6.74225627167046	6.10153111978225	5.541541802157
ENSMUSG00000103144	10.6448145935091	0	3.70355001182652	12.5030932103216	2.76608564420118	0	0	0	0	0	0	0	4.93625724330974	0	4.73715120206191	0.0048663042292303	1	Pcdhga1	18	37794846	37974926	+	5366	protein_coding	protocadherin gamma subfamily A, 1 [Source:MGI Symbol;Acc:MGI:1935212]	-	10	0	4	14	3	0	0	0	0	0	0	0	0.126082686729231	0	0.0432492437788071	0.145136021032344	0.0326134988522449	0	0	0	0	0	0
ENSMUSG00000031010	934.614721310101	829.625226534136	986.996078151767	1145.81918491733	956.143604345541	1188.30246429562	619.046977380622	531.960335485599	662.155784255722	1017.09832368824	848.894969811352	884.513251746564	1006.91687992575	760.61160706135	0.406242752027715	0.004938654013556	0.0618016491021975	Usp9x	X	12937737	13039567	+	15051	protein_coding	ubiquitin specific peptidase 9, X chromosome [Source:MGI Symbol;Acc:MGI:894681]	-	878	772	1066	1283	1037	1216	633	625	675	882	874	775	3.94671061030091	3.47486496748117	4.10923562050372	4.7419737530815	4.0192054598868	5.01093027095363	2.60310376270329	2.25379706233162	2.80215535124288	4.24375976771557	3.60507829064143
ENSMUSG00000004319	1035.74045994844	954.28393932942	1033.2904532996	1282.46013214442	1079.69542978653	1249.86747683725	793.123378602976	754.958108121162	741.614478366408	1036.70225963235	905.228960942998	1068.26374662553	1105.88964855761	883.315155381903	0.325669959104353	0.00494016692717083	0.0618016491021975	Clcn3	8	61363423	61436334	-	17071	protein_coding	chloride channel, voltage-sensitive 3 [Source:MGI Symbol;Acc:MGI:103555]	-	973	888	1116	1436	1171	1279	811	887	756	899	932	936	3.85620400193516	3.52403320204404	3.79292650405161	4.67943396236863	4.00151767713241	4.64688283390776	2.94045825042892	2.82010192087455	2.76704756689961	3.81371549403542	3.38942145145573
ENSMUSG00000056966	52.1595915081947	33.313966350464	60.1826876921809	37.5092796309648	56.2437414320907	38.1116744305339	39.1182924095179	12.7670480516544	26.4862313702289	27.6761448622651	19.4255141833261	22.8261484321694	46.2534901740715	24.7165632181936	0.909603141907586	0.00494131407086451	0.0618016491021975	Gjc3	5	137951723	137961360	-	4356	protein_coding	gap junction protein, gamma 3 [Source:MGI Symbol;Acc:MGI:2153041]	-	49	31	65	42	61	39	40	15	27	24	20	20	0.761052000745264	0.482125176456133	0.865754346740709	0.536363559820633	0.816899764716094	0.555298980538187	0.568362277557235	0.1868975183755	0.387284115624945	0.398998196334946	0.285043241613367
ENSMUSG00000114934	5.32240729675456	6.44786445492852	0.925887502956629	2.67923425935463	11.9863711248718	2.93166726388722	0	0	0	2.30634540518876	0	0	5.04890531712556	0.384390900864793	3.80553938076191	0.00497012968939579	1	Gm48342	13	120159896	120166085	-	1899	lncRNA	predicted gene, 48342 [Source:MGI Symbol;Acc:MGI:6097804]	-	5	6	1	3	13	3	0	0	0	2	0	0	0.17813578119775	0.214048541878705	0.0305523225535912	0.0878808269983705	0.399342189386502	0.0979820293767708	0	0	0	0.0762697974036784	0
ENSMUSG00000039219	466.2428791957	373.976138385854	436.093013892572	404.564373162549	345.760705525148	527.7001074997	350.108717065186	306.409153239705	350.206837006359	313.662975105671	273.899749984899	390.327138190097	425.722869610254	330.769095098653	0.364770495960144	0.00499049697256684	0.0621703774202277	Arid4b	13	14237817	14374188	+	16965	protein_coding	AT rich interactive domain 4B (RBP1-like) [Source:MGI Symbol;Acc:MGI:2137512]	ARID	438	348	471	453	375	540	358	360	357	272	282	342	1.74673237418925	1.38966899496636	1.6107800359143	1.48539577135018	1.28944912202436	1.97419494733674	1.306117620118	1.15172497265242	1.3148255775735	1.16108122349918	1.03196238624205
ENSMUSG00000028766	720.653947980568	564.188139806245	662.00956461399	687.670126567688	638.965783810473	539.426776555249	178.966187773545	224.700045709117	411.027072004663	626.172777508747	269.043371439067	485.0556541836	635.485723222369	365.827518103123	0.798009194260684	0.00500671996878669	0.0622582358071864	Alpl	4	137469044	137523695	-	4033	protein_coding	alkaline phosphatase, liver/bone/kidney [Source:MGI Symbol;Acc:MGI:87983]	-	677	525	715	770	693	552	183	264	419	543	277	425	11.3570769864019	8.81895384079354	10.2860117228931	10.6208762428157	10.0237867712137	8.48908722457569	2.80851012168482	3.55284165255857	6.49141825872191	9.75032673957164	4.26402920716078
ENSMUSG00000026933	309.764104671115	257.914578197141	235.175425750984	272.388816367721	263.700164747179	274.599500384103	149.627468466406	233.211411076887	248.185797654367	224.868677005904	189.39876328743	150.652579652318	268.923765019707	199.324116190552	0.430326048205191	0.00502054128818716	0.0623481173928359	Camsap1	2	25816850	25873294	-	8368	protein_coding	calmodulin regulated spectrin-associated protein 1 [Source:MGI Symbol;Acc:MGI:3036242]	-	291	240	254	305	286	281	153	274	253	195	195	132	2.35275898451022	1.94301233760832	1.76108873977468	2.02757072949814	1.99375214964021	2.08273870833346	1.13167803058979	1.77717026507304	1.88908996679835	1.68756496938152	1.44671026703649
ENSMUSG00000031119	1302.92530624552	1289.5728909857	1381.42415441129	1586.10668153794	1441.13062062881	1585.05476734169	1093.35627284603	1053.70703252987	1254.66258972306	1256.95824582787	1327.73389443034	1236.03593760197	1431.03573685849	1203.74232882653	0.25037827273951	0.00503065298135037	0.0623501804958003	Gpc4	X	51141898	51254129	-	2651	protein_coding	glypican 4 [Source:MGI Symbol;Acc:MGI:104902]	-	1224	1200	1492	1776	1563	1622	1118	1238	1279	1090	1367	1083	31.2376110567561	30.6660264826602	32.6533911390684	37.2675702595942	34.3934749725527	37.948207127082	26.1026861429834	25.3460953218678	30.1449528228346	29.7758612493112	32.0130763628729
ENSMUSG00000040370	1147.51101318028	1370.17119667231	1384.20181692016	1311.93170899732	1166.36611330483	1327.06804811962	1022.94334650889	837.518352188527	1001.57193440754	1177.38932934886	1070.34583150127	1237.17724502358	1284.54164953242	1057.82433982978	0.281347941492664	0.00503215521335528	0.0623501804958003	Etfrf1	6	145156860	145162665	+	2682	protein_coding	electron transfer flavoprotein regulatory factor 1 [Source:MGI Symbol;Acc:MGI:1914886]	-	1078	1275	1495	1469	1265	1358	1046	984	1021	1021	1102	1084	27.1935627648845	32.206045290223	32.3408637178442	30.4691870867874	27.5143057511869	31.4044460106948	24.1393758460769	19.9129898235888	23.7859641702318	27.5685884638789	25.5088831699393
ENSMUSG00000027502	2110.86673389286	1864.50747155016	1938.80843119118	1921.90404204372	1837.60289629765	2222.20378602652	1550.06233672715	1560.13327191217	1996.27706808947	1850.84218766398	1414.17743254614	1505.38448910157	1982.64889350035	1646.14613100675	0.268443253149608	0.00503782648155789	0.0623501804958003	Rtf2	2	172282476	172311828	+	2644	protein_coding	replication termination factor 2 [Source:MGI Symbol;Acc:MGI:1913654]	-	1983	1735	2094	2152	1993	2274	1585	1833	2035	1605	1456	1319	50.7419772741791	44.4553482150146	45.949884246706	45.2771061385826	43.9716391122547	53.3432104123138	37.104017950523	37.6271358182062	48.0902189666709	43.960350634963	34.1875947965423
ENSMUSG00000058761	1653.13970637197	1781.75987771191	1911.03180610248	2150.53203217532	1620.00415895382	2095.16487125807	1397.50099633003	1369.47868767413	1277.22493496437	1794.33672523685	1490.90821357028	1778.156962866	1868.60540876226	1517.93442010694	0.300700557886133	0.00504609016551258	0.0623501804958003	Rnf169	7	99569461	99629655	-	7640	protein_coding	ring finger protein 169 [Source:MGI Symbol;Acc:MGI:1920257]	-	1553	1658	2064	2408	1757	2144	1429	1609	1302	1556	1535	1558	13.7525812751833	14.7020249595083	15.6742052529336	17.5331912151629	13.415448918669	17.4053019807256	11.576892375017	11.4304369492171	10.6480827476065	14.749041442374	12.4733654012966
ENSMUSG00000107881	1805.36055505915	1723.72909761756	1782.33344319151	1863.85396642437	1669.79370054945	1884.08482825819	1564.73169638072	1656.31170056796	1603.88845519719	1510.65624039864	1498.67841924361	1613.80869415438	1788.1925985167	1574.67920099042	0.183266967619909	0.0050684416731653	0.0625006030419842	Gm44250	6	5216258	5220486	-	4229	TEC	predicted gene, 44250 [Source:MGI Symbol;Acc:MGI:5690642]	-	1696	1604	1925	2087	1811	1928	1600	1946	1635	1310	1543	1414	27.1327795245552	25.6952393145885	26.4096255660544	27.4525448104905	24.9808707414925	28.2760984204578	23.4172246965175	24.9749885429967	24.1564918466654	22.4326805749771	22.6514946819799
ENSMUSG00000021188	534.369692594158	557.740275351317	693.489739714515	761.795607743166	626.057384137534	643.012353212598	505.60392939302	477.487597131874	450.265933293891	581.199042107567	396.280489339853	594.621166658013	636.077508792215	500.90969298737	0.346853371071916	0.00511448671305448	0.0628790048145497	Trip11	12	101800302	101879526	-	10150	protein_coding	thyroid hormone receptor interactor 11 [Source:MGI Symbol;Acc:MGI:1924393]	-	502	519	749	853	679	658	517	561	459	504	408	521	3.34613761466508	3.46407513880716	4.28139177698749	4.67499159181706	3.90238882289452	4.0207770427425	3.15266355639736	2.99983222341217	2.82553333303039	3.59593684807246	2.49552970970874
[truncated: 993 more rows]
[truncated: 1 more columns]
