# Supplementary material for: Loss of CTRP10 results in female obesity with preserved metabolic health
Source: eLife. 2025 Mar 24;13:RP93373. doi: 10.7554/eLife.93373 (PMC11932693; doi:10.7554/eLife.93373)
Supplement: Figure 8—source data 6. [file elife-93373-fig8-data6.xls]

gene_id	KO_Liver1	KO_Liver2	KO_Liver3	KO_Liver4	KO_Liver5	KO_Liver6	WT_Liver1	WT_Liver2	WT_Liver3	WT_Liver4	WT_Liver5	WT_Liver6	KO_Liver	WT_Liver	log2FoldChange	pvalue	padj	gene_name	gene_chr	gene_start	gene_end	gene_strand	gene_length	gene_biotype	gene_description	tf_family	KO_Liver1_count	KO_Liver2_count	KO_Liver3_count	KO_Liver4_count	KO_Liver5_count	KO_Liver6_count	WT_Liver1_count	WT_Liver2_count	WT_Liver3_count	WT_Liver4_count	WT_Liver5_count	WT_Liver6_count	KO_Liver1_fpkm	KO_Liver2_fpkm	KO_Liver3_fpkm	KO_Liver4_fpkm	KO_Liver5_fpkm	KO_Liver6_fpkm	WT_Liver1_fpkm	WT_Liver2_fpkm	WT_Liver3_fpkm	WT_Liver4_fpkm	WT_Liver5_fpkm
ENSMUSG00000020538	5246.82911314065	7467.70168288304	6796.01427170166	5393.29856408087	4386.08980315501	7274.4437041255	14653.7123366054	14664.2313921302	11124.2171754961	13195.7552357875	18529.0267037656	12032.8041460181	6094.06285651445	14033.2911649672	-1.20344921866499	3.01325463236725e-19	3.70087933947346e-15	Srebf1	11	60089915	60113407	-	5634	protein_coding	sterol regulatory element binding transcription factor 1 [Source:MGI Symbol;Acc:MGI:107606]	bHLH	4929	6949	7340	6039	4757	7444	14984	17229	11340	11443	19077	10543	59.1899671007997	83.5586581458176	75.5872268876179	59.6274218878097	49.2541825665206	81.9482459156677	164.612968753519	165.975266724204	125.762164575461	147.085756027677	210.214108738416
ENSMUSG00000008035	391.729177041136	609.323190990745	370.355001182652	348.300453716102	401.082418409171	444.636201689562	1070.86325471055	1297.98321858486	913.284496506781	889.096153700266	1543.35710186526	673.371378748997	427.571073838228	1064.65926735279	-1.31754568773238	3.80154193845201e-14	1.55635126960225e-10	Mid1ip1	X	10581252	10585929	+	2128	protein_coding	Mid1 interacting protein 1 (gastrulation specific G12-like (zebrafish)) [Source:MGI Symbol;Acc:MGI:1915291]	-	368	567	400	390	435	455	1095	1525	931	771	1589	590	11.6999045343972	18.0508402758994	10.9058008513665	10.1950844741954	11.9246170356984	13.2614164431159	31.8489868272797	38.8954111784651	27.3358038278607	26.2379751416471	46.3575950372035
ENSMUSG00000031767	1645.68833615651	2100.92916823087	1614.74780515636	1705.77914512245	1590.49924541568	1693.52645610552	3802.29802220514	3857.35078467318	2721.21503040796	2351.31914058994	4159.97386235929	2260.93000220638	1725.19502603123	3192.18114040698	-0.888229784387545	3.21413699564297e-10	3.9476030580487e-07	Nudt7	8	114860297	114881479	+	5618	protein_coding	nudix (nucleoside diphosphate linked moiety X)-type motif 7 [Source:MGI Symbol;Acc:MGI:1914778]	-	1546	1955	1744	1910	1725	1733	3888	4532	2774	2039	4283	1981	18.6180365173563	23.5749627361184	18.0108388684668	18.912523365226	17.911591319626	19.1322905703087	42.8348891201533	43.7832819992636	30.8516583709447	26.2834912784518	47.3298320388368
ENSMUSG00000026272	4388.85705690381	6316.7578776783	3658.18152418164	4505.57894614804	4513.32974278826	3852.21078474781	10607.902944151	10446.8498524004	8891.52596813905	5423.37122030136	8282.0679720611	7268.98696822435	4539.15265540798	8486.78415421288	-0.902979878369677	7.24815285122355e-10	7.41848444322731e-07	Agxt	1	93062962	93073143	+	1697	protein_coding	alanine-glyoxylate aminotransferase [Source:MGI Symbol;Acc:MGI:1329033]	-	4123	5878	3951	5045	4895	3942	10847	12274	9064	4703	8527	6369	164.375700099344	234.657115309428	135.081035916997	165.377785979311	168.266499812887	144.073769095725	395.622445801907	392.558534362447	333.727385666443	200.696915675563	311.948602525314
ENSMUSG00000024039	5542.7549588402	7019.57510326551	5803.46286853215	5854.12685668987	5333.01312201988	6086.14123982988	14317.2950218836	13899.9107821045	10285.4865154389	6824.47605395353	12517.8013397354	7960.61926571908	5939.84569152958	10967.5981631392	-0.884880092095617	1.51353751661556e-09	1.32780484136231e-06	Cbs	17	31827868	31856212	-	7485	protein_coding	cystathionine beta-synthase [Source:MGI Symbol;Acc:MGI:88285]	-	5207	6532	6268	6555	5784	6228	14640	16331	10485	5918	12888	6975	47.0654153937476	59.1208078038896	48.5854666396075	48.7167980864053	45.0778596090487	51.6068010662323	121.060481718155	118.418926840377	87.5246578902932	57.2572806483237	106.896219570537
ENSMUSG00000003814	6398.59805215833	7012.05259473476	7379.32339856433	5249.51299216217	6132.41187319402	6482.89354287595	11392.2247069619	10616.226023219	9445.7748838494	9500.98989667508	10643.2392210444	7288.38919439169	6442.46540894826	9814.47398769024	-0.607431952323307	8.04275246425155e-09	4.70386122694941e-06	Calr	8	85568479	85573563	-	2880	protein_coding	calreticulin [Source:MGI Symbol;Acc:MGI:88252]	-	6011	6525	7970	5878	6651	6634	11649	12473	9629	8239	10958	6386	141.20834509032	153.487854815132	160.55913833968	113.536352845151	134.716647653757	142.867392905042	250.350972725929	235.059918625342	208.901948459104	207.171293172936	236.214978020946
ENSMUSG00000109764	3321.18215317485	4285.68057437582	3885.94984990897	3456.21219456747	3261.21497451319	3775.01021346545	5312.26410921254	5664.31365225066	4804.79856486596	4491.6076766051	5246.83138091639	4950.99159493754	3664.20832666763	5078.46782979803	-0.471171166203909	3.1827400267845e-08	1.69958317430292e-05	Klkb1	8	45719726	45747896	-	5249	protein_coding	kallikrein B, plasma 1 [Source:MGI Symbol;Acc:MGI:102849]	-	3120	3988	4197	3870	3537	3863	5432	6655	4898	3895	5402	4338	40.2146362089132	51.4712321692485	46.390771126185	41.0140104222096	39.3083934230732	45.6455322561251	64.0525337788415	68.8131809454584	58.3036843584299	53.7376228638822	63.8920217493542
ENSMUSG00000000303	72.384739235862	169.793763979784	74.996887739487	124.137854016765	72.8402552972977	65.4739022268147	228.84201059568	440.037589513688	257.014541444443	125.695824582787	492.436784547318	206.576643311133	96.6045670826684	291.767232332508	-1.59715844879486	5.23526293517033e-08	2.38146293962081e-05	Cdh1	8	107329983	107396878	+	4574	protein_coding	cadherin 1 [Source:MGI Symbol;Acc:MGI:88354]	-	68	158	81	139	79	67	234	517	262	109	507	181	1.00581677733397	2.34016734449681	1.02744374789481	1.69050509949839	1.007529423732	0.908508055946268	3.16645137168343	6.13471695164817	3.57897712681592	1.72575006934683	6.88145735414505
ENSMUSG00000059824	1861.77807240475	3056.28775163612	2072.13623161694	1882.60860623985	2088.39466137189	1193.1885764021	5431.57490106157	5438.76247000477	5018.65035889226	2621.16155299702	6054.93277094276	3999.14120531608	2025.73231661194	4760.70387653574	-1.23288068809671	1.26090555622082e-07	5.16214734716804e-05	Dbp	7	45354512	45359627	+	2993	protein_coding	D site albumin promoter binding protein [Source:MGI Symbol;Acc:MGI:94866]	TF_bZIP	1749	2844	2238	2108	2265	1221	5554	6390	5116	2273	6234	3504	39.535680255057	64.373758037792	43.3832976493503	39.1797567112775	44.1456887086753	25.3022467862013	114.855628918246	115.8762116133	106.801563559418	54.9971621780433	129.308985619052
ENSMUSG00000121142	108.577108853793	122.509424643642	130.550137916885	67.8739345703173	118.019654152584	66.4511246481104	360.866247477803	277.470510989289	203.061107171755	134.921206203542	283.612507076562	190.598339408615	102.330230797555	241.754986387927	-1.24286400024966	1.32596535997463e-07	5.25338921006722e-05	ENSMUSG00000121142	9	107552988	107555464	+	2477	lncRNA	novel transcript, antisense to Gnat1	-	102	114	141	76	128	68	369	326	207	117	292	167	2.78599471509421	3.11791903089445	3.30264809633711	1.70681099121421	3.01446863943839	1.70268004541531	9.22047904626067	7.14318240759625	5.2215342452203	3.42064037071891	7.31855715092059
ENSMUSG00000020440	2183.25147312872	2149.28815164284	1984.17691883606	2005.85338217017	1726.9594705296	1693.52645610552	2830.20845582862	3167.07905334706	2275.85395477522	2621.16155299702	2952.67815586557	2715.17035600655	1957.17597540215	2760.35858813668	-0.496512191834138	1.67774571335155e-07	6.0606096621717e-05	Arf5	6	28423559	28426601	+	1907	protein_coding	ADP-ribosylation factor 5 [Source:MGI Symbol;Acc:MGI:99434]	-	2051	2000	2143	2246	1873	1733	2894	3721	2320	2273	3040	2379	72.7647581816755	71.0501976975461	65.1989607311091	65.5174376499577	57.2946263341141	56.3635073015178	93.9292726603013	105.90320994765	76.0135619215065	86.3169933921781	98.9672526434766
ENSMUSG00000073155	2248.18484214913	2496.39818813316	2548.9682956396	1828.13084296631	1856.96549580706	1889.94816278596	3114.79403310787	3083.66767274292	3014.52551854494	3066.28621619845	2791.44638814397	3059.84519733231	2144.76597124687	3021.76083767841	-0.494811411153176	2.18118577303066e-07	7.04982201693753e-05	1810058I24Rik	6	35229589	35240431	+	2784	protein_coding	RIKEN cDNA 1810058I24 gene [Source:MGI Symbol;Acc:MGI:1914955]	-	2112	2323	2753	2047	2014	1934	3185	3623	3073	2659	2874	2681	51.3252183922732	56.5283054673885	57.372817182859	40.9021801235509	42.2004461410522	43.0861192412677	70.8097940742656	70.6316334465575	68.9679188530509	69.1666383031299	64.0893927439752
ENSMUSG00000027248	4454.85490738357	4591.95413598492	5034.05035357519	4017.06523285904	4076.28821100447	4570.46926440018	6211.98483463145	5858.37278263581	6074.17572757249	5366.86575787424	5602.31829047126	5507.94961668248	4457.44701753456	5770.27783497795	-0.372602180506416	3.71634067915629e-07	0.000106149060979994	Pdia3	2	121244256	121269168	+	3139	protein_coding	protein disulfide isomerase associated 3 [Source:MGI Symbol;Acc:MGI:95834]	-	4185	4273	5437	4498	4421	4677	6352	6883	6192	4654	5768	4826	90.2007751481107	92.2205196735264	100.49332421078	79.7124175144563	82.1591630065527	92.4115371880008	125.24843251642	119.010861978775	123.251843482174	107.36991890485	114.078173672801
ENSMUSG00000025464	863.29446353359	1157.39166965967	801.818577560441	845.744947869611	782.802237308934	923.475188124476	1527.56931859168	2026.55609406594	1168.33709488676	1135.87511205546	1813.37174901349	1246.30770439645	895.754514009453	1486.33617883496	-0.731591271372551	3.90517378770871e-07	0.000107698023411018	Paox	7	139695712	139717137	+	4907	protein_coding	polyamine oxidase (exo-N4-amino) [Source:MGI Symbol;Acc:MGI:1916983]	-	811	1077	866	947	849	945	1562	2381	1191	985	1867	1092	11.1817793816614	14.8691325645945	10.2393179576824	10.7357345883432	10.0929573792632	11.9444426824422	19.7023530598299	26.3356161931118	15.1652472486452	14.5367638160324	23.6209240777811
ENSMUSG00000028525	138.382589715619	183.764136965463	153.6973254908	161.647133647729	209.300480411223	227.692824161908	493.868441670164	254.489824496311	309.987004184901	251.391649165575	454.557031889832	322.990000315197	179.08074839879	347.88065862033	-0.958088460594968	3.94594614353997e-07	0.000107698023411018	Pde4b	4	101944740	102464456	+	10560	protein_coding	phosphodiesterase 4B, cAMP specific [Source:MGI Symbol;Acc:MGI:99557]	-	130	171	166	181	227	233	505	299	316	218	468	283	0.832885990611526	1.09702918175079	0.912038906047232	0.953482006788287	1.25397461833776	1.36849162223017	2.95992417359104	1.53676484484255	1.86972164710043	1.4949963668925	2.75137988967303
ENSMUSG00000092021	248.024180028763	251.466713742212	215.731788188895	156.28866512902	207.456423315089	150.492252879544	665.010970961805	368.542120424423	264.862313702289	388.619200774306	468.15489181816	319.566078050372	204.910003880587	412.459262621892	-1.01075455594511	4.51809328379972e-07	0.000116956313045368	Gbp11	5	105470908	105494338	-	2692	protein_coding	guanylate binding protein 11 [Source:MGI Symbol;Acc:MGI:3646307]	-	233	234	233	175	225	154	680	433	270	337	482	280	5.85581015596025	5.88879979943491	5.02169186601777	3.61626991483822	4.87566961853119	3.54809962396225	15.6346074954192	8.72997475207806	6.26675188581821	9.06572220576713	11.1157969863576
ENSMUSG00000032018	7122.44544451695	8046.93483975079	5894.1998438219	5715.69975328988	5806.93579572634	5449.96944356635	11766.782356783	11723.5546575658	13016.5112611691	7268.44754445237	12634.3544248353	7028.17110226496	6339.3641867787	10572.9702245118	-0.738127647328189	4.64846811483012e-07	0.000116956313045368	Sc5d	9	42162891	42175552	-	4866	protein_coding	sterol-C5-desaturase [Source:MGI Symbol;Acc:MGI:1353611]	-	6691	7488	6366	6400	6298	5577	12032	13774	13269	6303	13008	6158	93.0304342900487	104.250877501546	75.9038360315107	73.165393821578	75.5018092498656	71.0851165986603	153.044893788867	153.634276986732	170.380497207156	93.8043037643029	165.961383815922
ENSMUSG00000025153	6935.09670767119	7153.90561274319	5757.16849338432	7283.05179501234	6062.33770354092	8486.19950653222	9272.01325836599	15408.1247252733	11063.3969404978	9951.88042338949	15224.7467411819	7895.5647426874	6946.29330314736	11469.2878052326	-0.723562263607018	4.6660636209274e-07	0.000116956313045368	Fasn	11	120696672	120715373	-	10947	protein_coding	fatty acid synthase [Source:MGI Symbol;Acc:MGI:95485]	-	6515	6657	6218	8155	6575	8684	9481	18103	11278	8630	15675	6918	40.2647887629825	41.1973638302905	32.9552639783501	41.440662762464	35.037042997489	49.2011027667203	53.6058459722612	89.7543653150676	64.3710752995578	57.0904201916745	88.8957616257112
ENSMUSG00000087470	249.088661488113	271.884951182819	314.801751005254	215.231818834822	236.961336853234	278.508390069286	367.711948649469	457.060320249227	341.378093216283	464.728599145535	472.039994654825	376.631449130795	261.079484905588	413.258400841022	-0.663084442338871	4.85967089643066e-07	0.000117032309705807	A630031M04Rik	4	127368641	127464295	+	7514	lncRNA	RIKEN cDNA A630031M04 gene [Source:MGI Symbol;Acc:MGI:2444470]	-	234	253	340	241	257	285	376	537	348	403	486	330	2.10693331242266	2.28105269718743	2.62528780675428	1.78420066556859	1.99521058265347	2.35246846016986	3.0972037745235	3.87885229219638	2.89375557461364	3.8840196395823	4.01544519022734
ENSMUSG00000037621	210.767328951481	159.04732322157	234.249538248027	133.961712967732	130.928053825523	295.121171231314	423.455515333032	506.42623938229	490.485766115349	366.708919425012	283.612507076562	295.598622196594	194.012521407608	394.38126158814	-1.02479221528862	6.51961557751217e-07	0.000145588942769099	Atoh8	6	72183161	72212561	-	2507	protein_coding	atonal bHLH transcription factor 8 [Source:MGI Symbol;Acc:MGI:1918343]	bHLH	198	148	253	150	142	302	433	595	500	318	292	259	5.34339130450071	3.99938643744807	5.85511436533914	3.32839430534315	3.30415808369136	7.47141309447139	10.6902211117872	12.8813914659218	12.4614753332319	9.1858711200096	7.23097968202245
ENSMUSG00000028469	1796.84470338434	1875.25391230838	1797.14764323882	1769.18768926051	1606.17373073282	2138.16265779508	2276.68461823394	2804.49488868008	2150.28959864969	2674.20749731636	2480.63816121075	2474.35449004716	1830.46172278666	2476.778209023	-0.43641822941177	8.58767341570614e-07	0.000172907876871644	Npr2	4	43631935	43651244	+	4667	protein_coding	natriuretic peptide receptor 2 [Source:MGI Symbol;Acc:MGI:97372]	-	1688	1745	1941	1981	1742	2188	2328	3295	2192	2319	2554	2168	24.4703828694563	25.3304916039307	24.1299782059808	23.6126385844499	21.7739467676078	29.0776735836608	30.8743839546793	38.3193174658084	29.3465154075953	35.9840887808194	33.9743937501053
ENSMUSG00000024292	3355.24555987408	4586.58091560582	3375.78583577987	3586.6015951894	3484.34588314542	3666.53852470162	4617.91441894359	5321.30562792955	4895.04794583119	4424.72365985463	5765.4926096112	5139.30731950294	3675.84971904937	5027.29859694552	-0.451942741552814	9.68600568457778e-07	0.0001858805028406	Cyp4f14	17	33124044	33136316	-	2419	protein_coding	cytochrome P450, family 4, subfamily f, polypeptide 14 [Source:MGI Symbol;Acc:MGI:1927669]	-	3152	4268	3646	4016	3779	3752	4722	6252	4990	3837	5936	4503	88.1569311661638	119.529342471135	87.4480221123263	92.3539937890507	91.1313556104025	96.2004495586196	120.821226484783	140.275959458538	128.88977603593	114.869172550516	152.344453653101
ENSMUSG00000054226	2037.41751319765	2258.90184737662	2222.13000709591	2164.82128155854	2406.49451045503	2283.76879856815	2950.49720498789	3578.17800061033	2456.35271670567	2834.49850297698	3227.54918155964	3008.48636335993	2228.92232637532	3009.26032836674	-0.433237780103508	9.85649179279323e-07	0.00018624220338321	Tprkb	6	85888847	85907266	+	5355	protein_coding	Tp53rk binding protein [Source:MGI Symbol;Acc:MGI:1917036]	-	1914	2102	2400	2424	2610	2337	3017	4204	2504	2458	3323	2636	24.1817975730542	26.592503470904	26.0028506573758	25.1808847618457	28.4320280694299	27.0675767842529	34.8713660433969	42.6091998822735	29.2165304671045	33.2406850301252	38.5247199050849
ENSMUSG00000020644	538.627618431562	492.18698672621	443.500113916225	474.224463905769	598.396527695522	888.295180957829	2255.16955740871	1606.09464489812	1412.59900641221	1000.95390585192	1297.62434744619	780.654276380194	572.538481938853	1392.18262306622	-1.28216495821338	1.22744341323567e-06	0.000221697941196477	Id2	12	25143798	25147139	-	2438	protein_coding	inhibitor of DNA binding 2 [Source:MGI Symbol;Acc:MGI:96397]	bHLH	506	458	479	531	649	909	2306	1887	1440	868	1336	684	14.0418050318483	12.726757376994	11.3991116462347	12.1159832703746	15.5287966382149	23.1249244287555	58.5435059769961	42.0086133008591	36.9047767604542	25.7830081406891	34.0205539291431
ENSMUSG00000030109	1699.97689058341	2031.07730330248	1674.00460534559	1907.6147926605	1824.69449662471	1644.66533504073	2436.09165980273	2325.30501847465	2297.4353284843	2142.59488142036	2501.03495110324	2231.25600924456	1797.0055705929	2322.28630808831	-0.370289439345141	1.32144547022117e-06	0.00023185704664652	Slc6a12	6	121320035	121342734	+	3052	protein_coding	solute carrier family 6 (neurotransmitter transporter, betaine/GABA), member 12 [Source:MGI Symbol;Acc:MGI:95628]	-	1597	1890	1808	2136	1979	1683	2491	2732	2342	1858	2575	1955	35.401895022658	41.9530232712036	34.3702817290038	38.9327036744996	37.8257956477313	34.20186015538	50.5175551103288	48.5843405853937	47.9464164499905	44.086816761286	52.3794975131825
ENSMUSG00000028445	194.800107061217	324.542510898069	298.135775952035	153.609430869665	212.988594603491	259.941164064667	963.28795058438	398.331899211617	315.872833378285	413.989000231382	608.989869647274	413.153286622266	240.669597241524	518.937473279201	-1.1092904956508	1.70419385992265e-06	0.000286724780651644	Enho	4	41638144	41640324	-	1269	protein_coding	energy homeostasis associated [Source:MGI Symbol;Acc:MGI:1916888]	-	183	302	322	172	231	266	985	468	322	359	627	362	9.75653463743082	16.122460030254	14.7218858080574	7.53988409793112	10.6188421456015	13.0008023186776	48.0427362061412	20.0163265637216	15.8543353958278	20.487095331671	30.6742916474913
ENSMUSG00000032883	440.695324171278	513.679868242638	398.131626271351	329.545813900619	397.394304216903	403.592859995141	493.868441670164	928.589961623662	534.629485065731	679.218721828089	939.223610763819	647.121308052003	413.839966132988	703.775254833911	-0.767406881778839	1.75031484847922e-06	0.000290504959040835	Acsl3	1	78635542	78685460	+	4357	protein_coding	acyl-CoA synthetase long-chain family member 3 [Source:MGI Symbol;Acc:MGI:1921455]	-	414	478	430	369	431	413	505	1091	545	589	967	567	6.42863701063734	7.43235293899557	5.72598348119944	4.71125543442699	5.7705408168108	5.87912415835204	7.17392684717039	13.5905595400146	7.81560737660072	9.78983329857537	13.7786775828826
ENSMUSG00000022821	10793.8419978183	10131.7443468443	9610.71228068981	9401.4330160754	10358.0687089854	9007.05905708285	13709.0055749156	13480.3004694735	11960.0049209567	11284.9480675886	12809.1840524853	11944.9234745542	9883.80990124933	12531.3944266623	-0.342541361874285	1.91227983168364e-06	0.000310618172649538	Hgd	16	37400515	37452382	+	2615	protein_coding	homogentisate 1, 2-dioxygenase [Source:MGI Symbol;Acc:MGI:96078]	-	10140	9428	10380	10527	11234	9217	14018	15838	12192	9786	13188	10466	262.344754396521	244.24960425295	230.300486536833	223.939536466118	250.604885583867	218.608998430855	331.793205392057	328.722016446444	291.311113046077	271.007356559878	313.094810283933
ENSMUSG00000036611	286.345512565395	255.765290045498	249.063738295333	188.439476241276	286.750878448856	195.444484259148	424.43347264327	645.161494876935	491.46673764758	273.301930514868	608.989869647274	320.70738547198	243.634896642584	460.676815133651	-0.92123334571739	2.06652210600856e-06	0.00032962369488308	Eepd1	9	25392843	25515406	+	2935	protein_coding	endonuclease/exonuclease/phosphatase family domain containing 1 [Source:MGI Symbol;Acc:MGI:1914734]	-	269	238	269	211	311	200	434	758	501	237	627	281	6.20083674582814	5.49357223648969	5.31757188496543	3.99919144680864	6.18128958950556	4.22641394177144	9.15239488220667	14.0171992561751	10.665553832277	5.8477365977669	13.262581294946
ENSMUSG00000058756	174.57495933355	253.616001893855	260.174388330813	218.804131180628	241.57147959357	221.829489634133	592.642130004197	526.853516264937	305.082146523747	306.743938890105	365.199666646531	342.392226482541	228.428408327758	406.485604135343	-0.832507149448715	2.47472957222205e-06	0.000375242328469521	Thra	11	98631464	98659832	+	4614	protein_coding	thyroid hormone receptor alpha [Source:MGI Symbol;Acc:MGI:98742]	THR-like	164	236	281	245	262	227	606	619	311	266	376	300	2.40476355236682	3.46513692828089	3.53344165772102	2.95383572931129	3.31245897474211	3.05139483813992	8.12920657298345	7.28137177051056	4.21149792084448	4.17495316880252	5.05916540459366
ENSMUSG00000015890	3573.46425904101	4173.91759049039	3691.51347428808	4013.49292051324	3863.29961640098	3778.91910315063	6177.75632877312	7151.24918200001	4793.02690647919	4013.04100502844	5969.46050853612	5181.53569410245	3849.10116064739	5547.67827081989	-0.527594043285404	2.73002169088637e-06	0.000398685812670551	Amdhd1	10	93359200	93375895	-	2421	protein_coding	amidohydrolase domain containing 1 [Source:MGI Symbol;Acc:MGI:1919011]	-	3357	3884	3987	4494	4190	3867	6317	8402	4886	3480	6146	4540	93.8129245267352	108.685202747586	95.5477889013623	103.260951806658	100.959232546386	99.0671166091627	161.49876780179	188.359719332148	126.099238806092	104.09551456798	157.603693172971
ENSMUSG00000024070	2472.79043007217	2718.84951182819	2523.96933305977	2355.93999205917	3065.74492232297	2438.16994113288	4286.38689077293	4459.95545271126	3189.138451282	3013.24027187911	4855.40727012237	3180.82378402281	2595.91068841253	3830.82535346508	-0.561681103114218	2.7948601441618e-06	0.000399145026634828	Prkd3	17	79256834	79328245	-	11017	protein_coding	protein kinase D3 [Source:MGI Symbol;Acc:MGI:1922542]	-	2323	2530	2726	2638	3325	2495	4383	5240	3251	2613	4999	2787	14.2656637569717	15.5576200114971	14.3559420715975	13.3201552588306	17.6057733758982	14.0461512540403	24.6241499346358	25.8147595644844	18.4377283407462	17.1760629113836	28.1701014522042
ENSMUSG00000024378	1081.51316270053	1627.01113079363	1146.24872866031	1081.51756269282	1176.50842733357	1075.92188584661	1947.11300468376	2318.49592618044	2121.841424215	1185.46153826702	2623.4156904582	1628.64569063529	1198.12014967124	1970.82887907328	-0.71868886945862	3.09187001571648e-06	0.000419118021802193	Stard4	18	33332408	33346915	-	5586	protein_coding	StAR-related lipid transfer (START) domain containing 4 [Source:MGI Symbol;Acc:MGI:2156764]	-	1016	1514	1238	1211	1276	1101	1991	2724	2163	1028	2701	1427	12.3054896552252	18.3616173193662	12.8584585276111	12.0598264207576	13.3252863383042	12.2246526458362	22.0609115975174	26.4670975925406	24.1940949024245	13.3272254687732	30.0187273686323
ENSMUSG00000020805	24.483073565071	34.3886104262854	23.1471875739157	21.433874074837	35.9591133746153	40.0661192731254	143.759724604978	89.3693363615807	47.0866335470735	68.0371894530683	87.4148138249676	50.2175265507727	29.9129963813083	80.9808707237402	-1.44044251616861	3.85914360661363e-06	0.000478621566131477	Slc13a5	11	72132815	72158048	-	4940	protein_coding	solute carrier family 13 (sodium-dependent citrate transporter), member 5 [Source:MGI Symbol;Acc:MGI:3037150]	-	23	32	25	24	39	41	147	105	48	59	90	44	0.314997429772232	0.438842840515694	0.293617715229098	0.270260227481629	0.46053693379249	0.514762673768286	1.84180442263552	1.15361925714691	0.607110969918943	0.864913397864932	1.13105619880673
ENSMUSG00000047797	9801.7452777032	10766.8589956548	8832.96677820624	9137.97498057219	8361.87690242017	8081.62942411578	12616.6272593798	13347.5231697363	11897.2227428939	10943.6089476207	13121.9348308368	10624.4307877532	9163.84205977873	12091.8912897034	-0.400180272745277	3.948386658195e-06	0.000480139454811396	Gjb1	X	100419984	100429235	+	1707	protein_coding	gap junction protein, beta 1 [Source:MGI Symbol;Acc:MGI:95719]	-	9208	10019	9540	10232	9069	8270	12901	15682	12128	9490	13510	9309	364.953818973358	397.62789452413	324.25303424091	333.445495975019	309.922201127583	300.484537436878	467.781432798597	498.618141107789	443.924852388377	402.606009551366	491.34942442649
ENSMUSG00000039934	592.916172858458	689.921496677351	640.714152045987	485.83447902964	507.115701436883	516.950660865447	1017.07560264747	937.101326991432	664.117727320183	839.509727488708	1190.78401943789	721.306290456553	572.242110485628	894.982449057039	-0.646249121875751	4.26804903489761e-06	0.000508933769384586	Gsap	5	21391253	21520130	+	10425	protein_coding	gamma-secretase activating protein [Source:MGI Symbol;Acc:MGI:2442259]	-	557	642	692	544	550	529	1040	1101	677	728	1226	632	3.61480816520771	4.17200627049974	3.85122796031219	2.90282384062761	3.07760892606332	3.14723917611677	6.17462236038582	5.73206890256171	4.05757351234515	5.05711555665506	7.30101146251107
ENSMUSG00000037686	5182.96022557959	6499.44737056794	5564.58389276934	5532.61874556731	5006.61501600414	5215.43606245537	10738.9492237229	11125.2056722116	7232.70310713694	5813.14359377826	8487.97842240436	6923.17081947698	5500.27688549062	8386.85847312185	-0.608794283902673	4.74980869092924e-06	0.00054520701254199	Aspg	12	112073113	112093993	+	3521	protein_coding	asparaginase [Source:MGI Symbol;Acc:MGI:2144822]	-	4869	6048	6010	6195	5430	5337	10981	13071	7373	5041	8739	6066	93.5577723555726	116.367511069549	99.0324770749534	97.8753055439804	89.9623127130004	94.0115726970071	193.031858533746	201.485100586214	130.837428732303	103.68077485146	154.086410424998
ENSMUSG00000055862	285.281031106044	278.332815637748	203.695250650458	202.7287256245	178.87353832501	176.877258254529	354.020546306137	368.542120424423	321.758662571669	396.691409692466	648.812173723093	309.294311255895	220.964769933048	399.853203995614	-0.857565575325601	4.9037284892185e-06	0.000551919806061519	Izumo4	10	80538018	80541207	+	2799	protein_coding	IZUMO family member 4 [Source:MGI Symbol;Acc:MGI:1918814]	-	268	259	220	227	194	181	362	433	328	344	668	271	6.47795636988449	6.26877747327404	4.56025341780612	4.51149836092278	4.04320385365992	4.01075207280628	8.00495320950547	8.39624581371709	7.32191591326561	8.90026844814886	14.816382722267
ENSMUSG00000097750	143.704997012373	212.779527012641	185.177500591326	165.219445993536	167.809195748205	199.353373944331	405.852283748749	337.901205100453	290.367573540287	221.409158898121	242.818927291577	297.881237039811	179.007340050402	299.371730936499	-0.743566357804292	4.9431019920833e-06	0.000551919806061519	Gm4673	7	30656334	30661044	+	4452	lncRNA	predicted gene 4673 [Source:MGI Symbol;Acc:MGI:3782854]	-	135	198	200	185	182	204	415	397	296	192	250	261	2.05156242348433	3.01297843079803	2.60641781353413	2.31160921959663	2.38475099888354	2.84200705693647	5.76960480475806	4.83989007558161	4.15422817766488	3.1231556931447	3.48620945773761
ENSMUSG00000086390	1016.57979368012	1260.55750093852	960.145340566024	919.87042904509	1228.14202602532	712.395145124596	1615.58547651309	1607.79691797167	1564.64959390796	1865.8334327977	2240.73306104667	1044.29629077175	1016.28170589661	1656.48246216814	-0.705131371582211	5.62626084722212e-06	0.000611519785182142	1810019D21Rik	8	106862013	106865358	+	3346	lncRNA	RIKEN cDNA 1810019D21 gene [Source:MGI Symbol;Acc:MGI:1917021]	-	955	1173	1037	1030	1332	729	1652	1889	1595	1618	2307	915	19.3100571017498	23.7496964706837	17.9813384246422	17.1241543319389	23.2222927284725	13.5129986043385	30.5588658538326	30.6412281249752	29.7843785196399	35.018709899311	42.8045840944304
ENSMUSG00000021775	1418.95378531477	1909.64252273466	1795.2958682329	1826.34468679341	1616.31604476156	1720.8886839018	2265.92708782133	2434.2504951821	2074.75479066793	2007.67367521681	2790.4751124348	2384.19120374009	1714.57359862318	2326.21206084384	-0.440253031557171	5.85007103336563e-06	0.00062478758636345	Nr1d2	14	4230569	4265642	+	5409	protein_coding	nuclear receptor subfamily 1, group D, member 2 [Source:MGI Symbol;Acc:MGI:2449205]	THR-like	1333	1777	1939	2045	1753	1761	2317	2860	2115	1741	2873	2089	16.673212721139	22.2564777126442	20.7984046156875	21.0316902083538	18.9056555787594	20.1926126664205	26.5132018384549	28.6978392497062	24.4313340605553	23.3093064442917	32.9751870921064
ENSMUSG00000109628	7730.26435780632	9909.29302314931	9522.75296790893	7069.60613235042	7531.12918061175	6720.35859125082	11213.2585191883	12832.5855649862	9724.37079900292	10477.7271757725	11341.586455935	11203.0736505087	8080.56737551292	11132.1003608989	-0.462285503008934	6.01195892934355e-06	0.000636542065260324	BC024386	7	140485908	140487904	+	1707	lncRNA	cDNA sequence BC023486 [Source:MGI Symbol;Acc:MGI:2669313]	-	7262	9221	10285	7916	8168	6877	11466	15077	9913	9086	11677	9816	287.825220828033	365.957362551852	349.574681044838	257.970538129227	279.131606440633	249.870878349869	415.749314663105	479.381820780649	362.848537411443	385.466617785428	424.684472911038
ENSMUSG00000037797	880.326166883204	1109.0326862477	1086.06604096813	760.902529656715	971.818089662681	937.156302022616	1560.81986713977	1383.09687226256	963.314044650546	1410.33021527292	1894.95890858346	1560.16724533878	957.550302573508	1462.11452554134	-0.610752472015751	6.06605773810387e-06	0.000636780522558904	Adh4	3	138121227	138136653	+	1450	protein_coding	alcohol dehydrogenase 4 (class II), pi polypeptide [Source:MGI Symbol;Acc:MGI:1349472]	-	827	1032	1173	852	1054	959	1596	1625	982	1223	1951	1367	38.5872323730999	48.2167221632812	46.9352575178161	32.6865766161746	42.4032764879467	41.0204806807453	68.1268031954957	60.8254751182057	42.3152856889998	61.0809828498975	83.5329638369908
ENSMUSG00000078234	433.243953955821	540.545970138174	566.643151809457	346.514297543199	572.579728349644	278.508390069286	1343.71334426694	855.392219460843	839.711631589478	568.514142379029	935.338507927154	568.371095961018	456.339248644264	851.840156930744	-0.901098345314906	7.16079645098105e-06	0.000726850429842555	Klhdc7a	4	139687531	139695337	-	7807	protein_coding	kelch domain containing 7A [Source:MGI Symbol;Acc:MGI:2444612]	-	407	503	612	388	621	285	1374	1005	856	493	963	498	3.52708846771545	4.36485472560765	4.54816736824812	2.76468331421901	4.64017358935792	2.26417932749024	10.8932050574741	6.98685980952047	6.85083293795642	4.57309582540704	7.65791834975354
ENSMUSG00000064294	3410.59859576032	4297.50165920986	3883.1721874001	3428.52677388747	3622.65016535548	3880.55023496539	5081.46618399638	4415.69635279886	4820.49410938165	4949.41723953507	5995.68495268361	4432.8380255273	3753.83326942977	4949.26614398715	-0.39894634014263	7.52237053563432e-06	0.000739118039349286	Aox3	1	58152289	58239857	+	7033	protein_coding	aldehyde oxidase 3 [Source:MGI Symbol;Acc:MGI:1918974]	-	3204	3999	4194	3839	3929	3971	5196	5188	4914	4292	6173	3884	30.8218010685758	38.5209309903222	34.5984787515651	30.3651436425408	32.5887887051928	35.0194571688773	45.727941408646	40.036812750809	43.6564408637184	44.1943405301479	54.4909379295315
ENSMUSG00000030103	2652.68779670247	2792.99995305987	2698.96207111857	2685.48580595979	2625.01527634692	3097.7950755075	3674.18561456397	4208.87017436206	3254.86354394146	3543.69971507253	3850.13691113524	3034.73643405692	2758.82432978252	3594.41539885536	-0.382054236258381	8.45231377662593e-06	0.000804738897709455	Bhlhe40	6	108637590	108643886	+	4705	protein_coding	basic helix-loop-helix family, member e40 [Source:MGI Symbol;Acc:MGI:1097714]	bHLH	2492	2599	2915	3007	2847	3170	3757	4945	3318	3073	3964	2659	35.8339376173587	37.4224864502618	35.9457977561788	35.5526228298269	35.2983696204565	41.7878257104617	49.423636059855	57.043585444789	44.0626431945793	47.2988404902695	52.3049319967531
ENSMUSG00000030909	611.012357667424	1115.48055070263	960.145340566024	931.48044416896	951.533461605206	851.160728948591	1561.79782445	1732.91398887789	1303.7111663346	1139.33463016325	1642.42722420023	1042.01367592853	903.46881394314	1403.69975165908	-0.636175510589992	9.67570843795133e-06	0.000893511661916679	Anks4b	7	119773081	119784809	+	3900	protein_coding	ankyrin repeat and sterile alpha motif domain containing 4B [Source:MGI Symbol;Acc:MGI:1919324]	-	574	1038	1037	1043	1032	871	1597	2036	1329	988	1691	913	9.95757092491584	18.0309552096886	15.4270662484238	14.8770748000095	15.436253329578	13.8517194929941	25.3450664834602	28.3343538688705	21.2918876408656	18.3459370674808	26.9182997121936
ENSMUSG00000003477	14484.3992173879	13431.9763036919	13741.0964313793	12778.1612609487	12463.9819127705	13683.068342983	14314.3611499529	18696.0651668427	15145.2194861098	18489.9711133983	23721.4666449687	23260.9865598022	13430.4472448602	18938.0116868457	-0.49576845816004	1.04460092492649e-05	0.000938556303499816	Inmt	6	55147611	55152028	-	1600	protein_coding	indolethylamine N-methyltransferase [Source:MGI Symbol;Acc:MGI:102963]	-	13607	12499	14841	14308	13518	14002	14637	21966	15439	16034	24423	20381	575.37173730813	529.226123402577	538.161193196807	497.458429009044	492.855113121378	542.775493491334	566.220013565195	745.128446287475	602.910678997631	725.720612516416	947.649309615805
ENSMUSG00000020571	2462.14561547866	2667.26659618876	2740.62700875162	1916.54557352501	2215.63460100515	2331.65269721164	3851.19588771704	3484.55298156487	3417.70481829175	3009.78075377133	2994.44301135972	2775.6596493518	2388.97868202681	3255.55618367609	-0.446914210488664	1.23970122066735e-05	0.00107985889306641	Pdia6	12	17316546	17334771	+	3745	protein_coding	protein disulfide isomerase associated 6 [Source:MGI Symbol;Acc:MGI:1919103]	-	2313	2482	2960	2146	2403	2386	3938	4094	3484	2610	3083	2432	41.7859166658394	44.8989250249513	45.8573637294094	31.8768750999927	37.4307695347819	39.5156160974241	65.0844164695115	59.3329802516922	58.1272953873839	50.4703419430731	51.1081694969601
ENSMUSG00000024664	521.595915081947	371.826850234211	276.840363384032	283.105753405139	348.526791169349	235.510603532274	926.125572795337	1984.85040376387	694.527844819335	442.818317796241	1537.52944761026	634.566926414309	339.567712801159	1036.73641886656	-1.61089326895345	1.31546995750936e-05	0.00111424841504345	Fads3	19	10018933	10037474	+	3792	protein_coding	fatty acid desaturase 3 [Source:MGI Symbol;Acc:MGI:1928740]	-	490	346	299	317	378	241	947	2332	708	384	1583	556	8.74246443894085	6.18149835775188	4.57479939299885	4.65038360398735	5.81500748681023	3.94183874670742	15.457340577164	33.3780041487668	11.6659126643312	7.3334858364347	25.9167900134569
ENSMUSG00000072115	4891.29230571744	4902.52627389732	4622.95630226245	4348.39720293256	5411.38554860558	4615.42149577979	8882.78624889129	7465.3185640707	6389.06758941854	4550.41948443742	7013.5818958899	6677.78972383116	4798.66318819919	6829.82725108984	-0.509363004343382	1.61489111922659e-05	0.00128792809911305	Ang	14	51328607	51339466	+	1202	protein_coding	angiogenin, ribonuclease, RNase A family, 5 [Source:MGI Symbol;Acc:MGI:88022]	-	4595	4562	4993	4869	5869	4723	9083	8771	6513	3946	7221	5851	258.634925762455	257.120557660592	241.005133629487	225.337334136986	284.830471570351	243.704539071986	467.711417930119	396.045232960238	338.5559122051	237.738859581441	372.95935153653
ENSMUSG00000044254	529.047285297403	832.8491587616	361.096126153085	336.690438592232	364.201276486489	430.955087791422	1367.18431971265	2499.78800851393	1445.95203850805	731.111493444836	2206.73841122585	619.729929933399	475.806562180372	1478.41736688979	-1.63613884981135	1.80816075724098e-05	0.00141715716702207	Pcsk9	4	106299526	106321526	-	3521	protein_coding	proprotein convertase subtilisin/kexin type 9 [Source:MGI Symbol;Acc:MGI:2140260]	-	497	775	390	377	395	441	1398	2937	1474	634	2272	543	9.54984860561092	14.9115114217759	6.42640034263424	5.95625346086854	6.54421980140611	7.76824125152335	24.5750421846987	45.2728743341528	26.1568384580788	13.0397959245835	40.0599982246933
ENSMUSG00000061983	1068.73938518832	1118.7044829301	914.776852921149	992.209754047665	848.266264221695	1059.30910468458	1325.13215537242	1496.29803165389	1627.43177197073	1222.36306475004	1223.80739354955	1222.34024854267	1000.33430733225	1352.89544430655	-0.436598086295739	1.81154270658252e-05	0.00141715716702207	Rps12	10	23661081	23663173	-	2027	protein_coding	ribosomal protein S12 [Source:MGI Symbol;Acc:MGI:98105]	-	1004	1041	988	1111	920	1084	1355	1758	1659	1060	1260	1071	33.5108996436611	34.7922863385788	28.27954326735	30.4900513257795	26.4765190024428	33.1684879435213	41.3750633918139	47.0722837459886	51.1383167810794	37.8703813482389	38.5909455892813
ENSMUSG00000021273	2163.02632540105	2409.35201799162	1816.59128080091	1542.34585530182	1608.01778782895	1381.79250371218	2516.28415924224	2467.4448201164	2990.00123023917	2408.97777571966	2885.6601319331	2427.56088576122	1820.18762850609	2615.98816716863	-0.523757915528485	1.90564614824678e-05	0.00148133835397259	Fdft1	14	63382599	63417027	-	4116	protein_coding	farnesyl diphosphate farnesyl transferase 1 [Source:MGI Symbol;Acc:MGI:102706]	-	2032	2242	1962	1727	1744	1414	2573	2899	3048	2089	2971	2127	33.4006147784684	36.9016877981866	27.6562206896081	23.3407505216656	24.7171231586458	21.3070921229425	38.6916763029286	38.2272446636965	46.2693489197942	36.7545098722259	44.81216325255
ENSMUSG00000021018	173.510477874199	165.495187676499	155.549100496714	172.364070685148	167.809195748205	138.765583823995	238.62158369806	254.489824496311	252.10968378329	176.43542349694	279.727404239896	292.174699931768	162.248936050793	248.926436607711	-0.618493028631161	2.05405287762413e-05	0.00154772254251408	Polr2h	16	20536415	20541017	+	1509	protein_coding	polymerase (RNA) II (DNA directed) polypeptide H [Source:MGI Symbol;Acc:MGI:2384309]	-	163	154	168	193	182	142	244	299	257	153	288	256	7.30810010664122	6.91381045706426	6.45935624182724	7.11485271939293	7.03572660505602	5.83645639003341	10.0081478425049	10.7542987153991	10.6413732216381	7.3425980206251	11.8487318692755
ENSMUSG00000022751	2199.21869501898	2552.27968007587	2189.72394449243	2099.62658124758	2173.22128779406	2188.00100128117	3006.24077167145	2889.60854235777	2557.39278452543	2526.60139138428	3108.08226933218	2790.49664583271	2233.67853165168	2813.07040085064	-0.333194481640263	2.15614386186968e-05	0.00159528668141467	Nit2	16	56977028	56987704	-	2563	protein_coding	nitrilase family, member 2 [Source:MGI Symbol;Acc:MGI:1261838]	-	2066	2375	2365	2351	2357	2239	3074	3395	2607	2191	3200	2445	54.5365717510491	62.7770633333786	53.5367167973948	51.027215280888	53.6460541189467	54.1820743149884	74.2349435535979	71.8937801586235	63.554486888564	61.9072244412137	77.5121879340041
ENSMUSG00000040093	303.37721591501	485.739122271282	368.503226176738	324.18734538191	331.008248756075	511.087326337673	912.434170452006	1225.63661295882	536.591428130192	576.586351297189	1216.03718787622	577.501555333886	387.317080806448	840.797884341385	-1.11891194300844	2.22661490196294e-05	0.00163756192969514	Bmf	2	118359238	118380168	-	5253	protein_coding	BCL2 modifying factor [Source:MGI Symbol;Acc:MGI:2176433]	-	285	452	398	363	359	523	933	1440	547	500	1252	506	3.67065512358425	5.82930826272298	4.39587026283064	3.84412117777624	3.98670274179653	6.17510616094506	10.9932819989039	14.8783660087936	6.50629450114049	6.89302994810514	14.7967232753257
ENSMUSG00000010064	41019.7930360874	50474.9575972562	43100.989150134	41943.4123301967	42201.2466450293	42560.9681146934	68606.6391851228	69548.0686931188	55439.6061440179	43404.2673529498	71304.2636370261	52386.0106518288	43550.2278122329	60114.809277344	-0.465066181119611	2.32923014484727e-05	0.00169275767094758	Slc38a3	9	107527833	107546729	-	5277	protein_coding	solute carrier family 38, member 3 [Source:MGI Symbol;Acc:MGI:1923507]	-	38535	46969	46551	46965	45770	43553	70153	81712	56515	37639	73413	45900	494.053968608551	602.990135957559	511.812767954905	495.091052550004	505.965174321221	511.895275536789	822.834095807993	840.424865310453	669.160704223308	516.533560697548	863.683258357255
ENSMUSG00000054263	3023.12734455659	2970.3162255704	3297.08539802856	3888.46198841002	3929.68567186181	3358.71346199346	4476.11060895909	5092.34989953654	3910.15252747157	4008.42831421806	4650.46809548828	4874.52399768978	3411.23168173681	4502.00557389389	-0.400147842810859	2.42048825011088e-05	0.00171840674496311	Lifr	15	7120095	7226970	+	10776	protein_coding	LIF receptor alpha [Source:MGI Symbol;Acc:MGI:96788]	-	2840	2764	3561	4354	4262	3437	4577	5983	3986	3476	4788	4271	17.8306378939209	17.3766656205218	19.1727136548561	22.4765001331963	23.0718632916656	19.7820861854788	26.2891446105163	30.1343318809163	23.1117857795849	23.3598337118169	27.5845042219746
ENSMUSG00000034837	38.3213325366328	116.061560188713	111.106500354795	51.7985290141895	95.8909689989742	89.9044627592082	329.571613550189	159.162532377291	168.72710354368	145.299760526892	211.738104598255	117.554664425672	83.8472256420856	188.675629836997	-1.17098903663738	2.50403372950712e-05	0.00175740241518894	Gnat1	9	107551673	107556911	-	3029	protein_coding	guanine nucleotide binding protein, alpha transducing 1 [Source:MGI Symbol;Acc:MGI:95778]	-	36	108	120	58	104	92	337	187	172	126	218	103	0.804098682456454	2.41551906850376	2.29853524711534	1.06518873635463	2.00290740876848	1.88381692399658	6.8862653459083	3.35075350144531	3.54799472406135	3.01244296863119	4.46813044869572
ENSMUSG00000047496	650.398171663407	671.652547388387	674.971989655383	550.136101254151	702.5857536271	557.994002559868	858.646518388919	977.955880756725	675.889385706951	832.590691273141	1246.14673486037	945.002545091813	634.623094358049	922.705292679654	-0.540385662673993	2.85766680422773e-05	0.00196077450779469	Rnf152	1	105204639	105284435	-	8532	protein_coding	ring finger protein 152 [Source:MGI Symbol;Acc:MGI:2443787]	-	611	625	729	616	762	571	878	1149	689	722	1283	828	4.84503017885974	4.96266727500954	4.95730770345026	4.01631447606899	5.20991852433792	4.15083434646369	6.36937464589932	7.30919130301754	5.0457086162738	6.12821385868733	9.33564724847763
ENSMUSG00000034177	514.144544866491	572.785292412816	470.350851501968	384.023577174164	591.020299310985	453.431203481224	931.993316656765	781.343340761248	818.130257880403	577.739523999784	802.27373577137	568.371095961018	497.625961457941	746.641878505098	-0.586815085271709	2.88584783027922e-05	0.00196911016952719	Rnf43	11	87553548	87626365	+	6558	protein_coding	ring finger protein 43 [Source:MGI Symbol;Acc:MGI:2442609]	-	483	533	508	430	641	464	953	918	834	501	826	498	4.9828962129569	5.50607071484557	4.49429416725663	3.64749653868351	5.70181896580129	4.38830402749468	8.99445004281209	7.59751236820266	7.94599760987613	5.53240385636339	7.81946893676751
ENSMUSG00000030157	1433.85652574568	1880.62713268748	1253.65167900328	1419.1010793715	1411.62570709067	1158.00856923545	2242.45611237562	2317.64478964366	1963.90500752586	1433.39366932481	2379.62548745745	2055.49466631685	1426.14511552234	2065.41995544071	-0.534940070044259	2.94191388514123e-05	0.00199565999610781	Clec2d	6	129157578	129163497	+	1213	protein_coding	C-type lectin domain family 2, member d [Source:MGI Symbol;Acc:MGI:2135589]	-	1347	1750	1354	1589	1531	1185	2293	2723	2002	1243	2450	1801	75.1299185362125	97.7379522943676	64.7630149683686	72.8720423623743	73.6276936910675	60.5909399387161	117.002833549529	121.839185583343	103.123362173364	74.2092238953399	125.393177376182
ENSMUSG00000025880	178.832885170953	233.197764453248	139.809012946451	152.716352783214	148.446596238797	322.483399027595	337.395272032092	543.876247000477	338.435178619591	304.437593484916	256.416787219905	392.609753033314	195.914335103376	362.195138565049	-0.888405396279534	2.95725549007996e-05	0.00199565999610781	Smad7	18	75500600	75529006	+	4521	protein_coding	SMAD family member 7 [Source:MGI Symbol;Acc:MGI:1100518]	MH1	168	217	151	171	161	330	345	639	345	264	264	344	2.51409044667466	3.25170556967494	1.93781197520896	2.10406643591785	2.07739066647678	4.52719887558365	4.72321498539352	7.67125638926358	4.76802341864288	4.22879840203169	3.62525068749731
ENSMUSG00000010406	768.555613651359	718.936886724529	635.158827028248	615.330801565113	678.613011377356	605.87790120336	917.323957003196	898.800182836468	781.834311187867	808.374064518659	942.137437891318	891.361096276215	670.412173591661	873.305174952287	-0.382590305058155	3.27562939763435e-05	0.00217466379793216	Mrpl52	14	54664366	54667213	+	1109	protein_coding	mitochondrial ribosomal protein L52 [Source:MGI Symbol;Acc:MGI:1916086]	-	722	669	686	689	736	620	938	1056	797	701	970	781	44.046537531659	40.8677341610318	35.8890336547151	34.5609380023339	38.7144483447801	34.6745060858498	52.350932011156	51.681191649301	44.9035386336313	45.7755987529212	54.3011230682504
ENSMUSG00000020889	411.954324768803	747.952276771708	474.054401513794	461.721370695448	524.634243850157	292.189503967427	3161.73598399929	3188.35746676649	1824.6070499491	530.459443193414	1992.0864795001	518.153569410245	485.417686927889	1869.23333213644	-1.94534726329465	3.33270209892793e-05	0.00218884576915516	Nr1d1	11	98658758	98666159	-	3077	protein_coding	nuclear receptor subfamily 1, group D, member 1 [Source:MGI Symbol;Acc:MGI:2444210]	THR-like	387	696	512	517	569	299	3233	3746	1860	460	2051	454	8.50921685845838	15.3238443286346	9.65409703964449	9.34675571150918	10.7872706992322	6.0268978726205	65.03263243419	66.0754947525428	37.7693264272777	10.8262461527477	41.3815532551108
ENSMUSG00000113019	76.6426650732657	139.703729856785	99.9958503193159	91.0939648180574	103.267197383511	102.608354236053	248.401156800439	188.101174627708	177.555847333756	144.146587824297	181.628557614099	128.967738641757	102.218626947831	178.133510473676	-0.804477210218778	3.34223763883242e-05	0.00218884576915516	Gm47467	13	74654928	74670607	-	3499	lncRNA	predicted gene, 47467 [Source:MGI Symbol;Acc:MGI:6096433]	-	72	130	108	102	112	105	254	221	181	125	187	113	1.39217771315267	2.51701264807068	1.79080792716808	1.62163860416599	1.86724320303023	1.86121051229696	4.49306705190044	3.42806050108893	3.23212705203465	2.58710248052274	3.31792288378799
ENSMUSG00000044197	1256.08812203408	1633.45899524856	1318.46380421024	1033.29134602444	1421.76802111941	1229.34580599004	2453.69489138701	1972.08335571221	1982.54346663824	1679.01945497742	2380.59676316662	1297.66653836883	1315.40268243779	1960.93407837506	-0.576617028840805	3.35045598926209e-05	0.00218884576915516	Gpr146	5	139363452	139382170	+	6786	protein_coding	G protein-coupled receptor 146 [Source:MGI Symbol;Acc:MGI:1933113]	-	1180	1520	1424	1157	1542	1258	2509	2317	2021	1456	2451	1137	11.7645216983066	15.1745464967591	12.1748979359976	9.48456350691034	13.2555369744104	11.4978576099519	22.8844211513692	18.5315747335809	18.6082807582355	15.537998726239	22.4232252542488
ENSMUSG00000029370	131.995700959513	164.420543600677	169.437413041063	116.993229325152	179.795566873077	145.606140773066	354.998503616375	240.020503371102	228.566367009753	237.553576734442	441.93044767067	159.783039025186	151.374765762091	277.142072904588	-0.873613568731302	3.59441881031673e-05	0.00229930478272448	Rassf6	5	90750935	90788516	-	4260	protein_coding	Ras association (RalGDS/AF-6) domain family member 6 [Source:MGI Symbol;Acc:MGI:1920496]	-	124	153	183	131	195	149	363	282	233	206	455	140	1.9693286954611	2.43314404136276	2.49235950160947	1.71064361905772	2.67024935790481	2.16933593068753	5.27412175714361	3.59285471662468	3.41743382529392	3.50191163445241	6.63086859170026
ENSMUSG00000021555	521.595915081947	504.008071560246	553.680726768064	499.230650326413	509.881787081084	511.087326337673	685.548074476802	657.928542928589	684.718129497028	622.713259400964	669.208963615586	600.327703766055	516.580746192571	653.407445614171	-0.3397553750657	3.83625476921805e-05	0.00240392250385388	Naa35	13	59733073	59783736	+	8861	protein_coding	N(alpha)-acetyltransferase 35, NatC auxiliary subunit [Source:MGI Symbol;Acc:MGI:1925939]	-	490	469	598	559	553	523	701	773	698	540	689	526	3.74127357549528	3.5857176936759	3.91550373507542	3.5093518779926	3.64056845604912	3.66074175188403	4.89652985782801	4.73474838132462	4.92182851257595	4.41325056119942	4.82730910936877
ENSMUSG00000041012	1416.82482239606	1235.84068719463	1278.6506415831	1144.92610683088	1242.8944827944	1128.69189659658	1540.28276362477	1757.59694844442	1642.14634495419	1542.94507607128	1456.91356374946	1472.28657387493	1241.30477289928	1568.69521178651	-0.338476412986632	3.88890152745599e-05	0.00242454256650835	Cmtm8	9	114618413	114673224	-	3401	protein_coding	CKLF-like MARVEL transmembrane domain containing 8 [Source:MGI Symbol;Acc:MGI:2447167]	-	1331	1150	1381	1282	1348	1155	1575	2065	1674	1338	1500	1290	26.4775347454405	22.9074736931202	23.5589668894212	20.96907332965	23.1211838641444	21.0632553389585	28.6633569364666	32.9544122991315	30.7540710600001	28.4903013776397	27.3812487606842
ENSMUSG00000032064	576.948950968194	552.36705497221	512.015789135016	470.652151559963	461.936302581597	524.768440235813	778.454018949407	831.560396431089	647.441211272261	588.118078323133	832.383282755525	617.447315090182	516.448114908799	715.900717136933	-0.473219505772721	3.90987868903097e-05	0.00242530959892315	Dixdc1	9	50574052	50650817	-	9971	protein_coding	DIX domain containing 1 [Source:MGI Symbol;Acc:MGI:2679721]	-	542	514	553	527	501	537	796	977	660	510	857	541	3.67761865177081	3.49229072724598	3.21777453341552	2.94015173595561	2.93106747753198	3.34030181604466	4.94114361775974	5.31809381521527	4.13579506887415	3.70406860332406	5.33593744318989
ENSMUSG00000057229	1041.06286724519	1457.21736681384	1149.02639116918	1219.05158800636	1172.8203131413	989.926312772586	1592.11450106738	1682.69693320805	1582.30708148812	1313.463708255	1654.08253271022	1522.5041004257	1171.51747319141	1557.86147619241	-0.411794664546057	4.09714700510418e-05	0.0024911465107272	Dmac2	7	25318839	25324976	+	3020	protein_coding	distal membrane arm assembly complex 2 [Source:MGI Symbol;Acc:MGI:1913599]	-	978	1356	1241	1365	1272	1013	1628	1977	1613	1139	1703	1334	21.9097809157383	30.4185658649839	23.8415251380211	25.1433738953003	24.5701029048497	20.8042777202773	33.3657263239405	35.5303817111777	33.3719217213543	27.3126816659036	35.0087277794158
ENSMUSG00000095532	136.253626796917	145.076950235892	104.625287834099	202.7287256245	213.910623151558	191.535594573965	535.920606010396	413.652356873602	321.758662571669	237.553576734442	312.750778351551	152.935194495535	165.688468036155	329.095195839532	-0.990777039011414	4.16848949366063e-05	0.00252203881581969	Mup-ps13	4	61452467	61455210	+	545	unprocessed_pseudogene	major urinary protein, pseudogene 13 [Source:MGI Symbol;Acc:MGI:3802118]	-	128	135	113	227	232	196	548	486	328	206	322	134	15.8898424246971	16.7812093084814	12.0295986051513	23.1700622242621	24.8323768092635	22.3053842581967	62.2353565325479	48.3993928759911	37.6037479655604	27.3727404821418	36.6798873459303
ENSMUSG00000116270	52.1595915081947	78.4490175349636	55.5532501773977	22.3269521612886	79.2944551337672	32.2483399027595	102.685517574985	120.010251685551	112.81172620653	110.70457944906	238.933824454912	84.4567491990268	53.3386010697285	128.267108095011	-1.26896863268451	4.44159963818219e-05	0.00267410425275263	Gm1600	16	10141969	10165455	-	4727	lncRNA	predicted gene 1600 [Source:MGI Symbol;Acc:MGI:2686446]	-	49	73	60	25	86	33	105	141	115	96	246	74	0.701320608260286	1.04622054915095	0.736435716470527	0.294206491908021	1.06130364546496	0.432990609615267	1.37485476258265	1.61895082428825	1.52007854704777	1.47073081720755	3.23085991828946
ENSMUSG00000036904	568.433099293387	673.80183554003	641.640039548944	496.551416067058	586.41015657065	580.470118249671	834.19758563297	776.236521540586	853.445233040708	614.641050482804	971.275709166307	845.708799411876	591.217777544957	815.917483212542	-0.4656621352164	4.55388232651993e-05	0.00271508654050086	Fzd8	18	9212163	9218136	+	5974	protein_coding	frizzled class receptor 8 [Source:MGI Symbol;Acc:MGI:108460]	-	534	627	693	556	636	594	853	912	870	533	1000	741	6.04758751577093	7.11030631359066	6.73034321171475	5.17734872789128	6.21038757722179	6.16696334277278	8.83765285874848	8.2857107255868	9.09929669720745	6.46114596825318	10.3921021130551
ENSMUSG00000031489	104.319183016389	131.106577250213	245.360188283507	140.213259572892	161.354995911736	131.925026874925	217.106522872825	231.509138003333	193.251391849448	425.520727257326	328.291189698212	302.446466726245	152.379871818277	283.020906067898	-0.890177454173192	4.62109204965172e-05	0.00274184794946002	Adrb3	8	27715804	27740644	-	3376	protein_coding	adrenergic receptor, beta 3 [Source:MGI Symbol;Acc:MGI:87939]	-	98	122	265	157	175	135	222	272	197	369	338	265	1.9639469877052	2.44818019773769	4.55420558064469	2.58699184476453	3.02386513597952	2.48017011859951	4.07008671497873	4.37287046784913	3.64600768726375	7.9153749118005	6.21559753907177
ENSMUSG00000057103	2252.44276798653	2738.19310519298	2388.7897576281	2449.71319113658	2342.8745406384	2078.55209009604	3175.42738634262	4599.54184474268	2510.30615097836	2865.63416594703	4196.88233930761	3084.95396060769	2375.09424211311	3405.457641321	-0.520169591551615	4.70459852977393e-05	0.00274392213128777	Nat8f1	6	85887136	85892669	-	1345	protein_coding	N-acetyltransferase 8 (GCN5-related) family member 1 [Source:MGI Symbol;Acc:MGI:1913366]	-	2116	2548	2580	2743	2541	2127	3247	5404	2559	2485	4321	2703	106.438685414784	128.340322832525	111.29268413793	113.449181898129	110.207001866506	98.0833624644014	149.421513106592	218.068633883322	118.878083051294	133.798631224877	199.448422512323
ENSMUSG00000068877	174.57495933355	252.541357818034	192.584600614979	158.967899388375	255.401907814576	210.102820578584	477.243167396119	233.211411076887	208.946936365139	404.763618610627	541.000570005633	392.609753033314	207.362257591349	376.29590941462	-0.859380595390804	4.70733278510146e-05	0.00274392213128777	Selenbp2	3	94600863	94611720	+	2271	protein_coding	selenium binding protein 2 [Source:MGI Symbol;Acc:MGI:104859]	-	164	235	208	178	277	215	488	274	213	351	557	344	4.88576795712043	7.01030181575667	5.31392469840955	4.36014280106314	7.11523816982203	5.87180285690516	13.3001277801319	6.54837550776361	5.86025158491221	11.1927690862229	15.2267313249798
ENSMUSG00000032518	6922.32293015898	7223.75747767158	6253.44419496907	6451.59609652595	5792.18333895727	6590.38800921848	8668.61359794918	8917.3574958122	7412.22089753516	7447.1893133545	7869.27579566542	8176.32636840308	6538.94867458356	8081.83057811992	-0.305827345713091	4.79974924737592e-05	0.002780532353868	Rpsa	9	119956755	119961435	+	3170	protein_coding	ribosomal protein SA [Source:MGI Symbol;Acc:MGI:105381]	-	6503	6722	6754	7224	6282	6744	8864	10477	7556	6458	8102	7164	138.790779480121	143.656484377915	123.614947638703	126.76995036326	115.602034371407	131.949709864992	173.070724150887	179.381573225817	148.931470913612	147.532037500155	158.67247660111
ENSMUSG00000047631	11927.514752027	14462.5599724047	12991.1275539845	12482.5524143332	11989.137210516	11814.6190734655	15507.4690684432	14471.0233982819	16774.6132011449	14770.9891475314	14750.7641951087	15617.6507572903	12611.2518294551	15315.4182946334	-0.280294921557966	5.25258068975819e-05	0.00294576237587261	Apof	10	128103866	128106022	+	1932	protein_coding	apolipoprotein F [Source:MGI Symbol;Acc:MGI:104539]	-	11205	13458	14031	13977	13003	12090	15857	17002	17100	12809	15187	13684	392.383613082938	471.910227766586	421.357470023904	402.443287732552	392.611708944	388.122945838274	508.003880525886	477.631583227143	553.022473181211	480.126487204482	488.015363623833
ENSMUSG00000034429	602.496505992616	603.949970611638	580.531464353806	425.998247237386	606.694784628125	498.383434860828	943.728804379621	712.401281282314	723.956990786256	731.111493444836	859.579002612182	655.110460003262	553.0090679474	770.981338751412	-0.480352331723532	6.14703927858729e-05	0.00340080794682924	Zfp707	15	75840972	75847717	+	3493	protein_coding	zinc finger protein 707 [Source:MGI Symbol;Acc:MGI:1916270]	zf-C2H2	566	562	627	477	658	510	965	837	738	634	885	574	10.9628625392444	10.8999302289124	10.4144934302468	7.59657165322502	10.9888973113345	9.05569382871541	17.0994386501785	13.0054989763633	13.2011439859057	13.1443233468247	15.7294417265106
ENSMUSG00000053317	539.692099890912	622.218919900602	719.414589797301	463.507526868351	508.959758533017	431.932310212718	863.536304940109	841.774034872412	815.187343283711	719.579766418892	788.675875843041	644.838693208786	547.620867533817	778.932003094492	-0.509242477468306	6.38229053881258e-05	0.00349943269632572	Sec61b	4	47474658	47483242	+	1271	protein_coding	Sec61 beta subunit [Source:MGI Symbol;Acc:MGI:1913462]	-	507	579	777	519	552	442	883	989	831	624	812	565	26.9878651749371	30.8616400229499	35.468650378633	22.7153614880359	25.3349664915585	21.5688434863959	42.9999824853996	42.2328984292261	40.8516182640481	35.5538471472153	39.6624102556993
ENSMUSG00000042659	283.152068187343	333.13966350464	304.616988472731	283.105753405139	401.082418409171	232.578936268387	532.008776769444	623.031944920734	474.790221599658	348.258156183502	494.37933596565	370.924912022753	306.279304707902	473.898891243624	-0.631280980452699	6.85604932441783e-05	0.00367536958633458	Arrdc4	7	68386743	68398989	-	4039	protein_coding	arrestin domain containing 4 [Source:MGI Symbol;Acc:MGI:1913662]	-	266	310	329	317	435	238	544	732	484	302	509	325	4.45567911361943	5.19964661709066	4.72597304137899	4.36599520334737	6.28264051794161	3.65471271446597	8.33639284529208	9.83642703494217	7.48730112980417	5.41477794892483	7.8237065545695
ENSMUSG00000086389	1.06448145935091	34.3886104262854	7.40710002365303	25.0061864206432	7.37622838453648	26.385005374985	60.6333532347528	142.139801641752	34.3340036280745	24.2166267544819	127.237117900786	50.2175265507727	16.9379353482423	73.1297382851034	-2.11397982057419	6.87759730346342e-05	0.00367536958633458	Gm15998	3	89222746	89226214	+	1844	lncRNA	predicted gene 15998 [Source:MGI Symbol;Acc:MGI:3802094]	-	1	32	8	28	8	27	62	167	35	21	131	44	0.0366897883399705	1.17564188294334	0.251708722469717	0.844685345834663	0.253078864556972	0.908140381821253	2.08105662994086	4.91536419151461	1.1859350901458	0.824718885754146	4.41041039103269
ENSMUSG00000022214	5859.97043372677	6490.85021796137	5558.10268024864	6011.30859990534	5868.71170844684	5829.1317430291	8355.66725867303	8762.45064611879	6941.35456206442	6274.41267481601	8137.34789139532	6835.29014801313	5936.34589721968	7551.08719684679	-0.347340383633988	7.13512873804223e-05	0.00377731255002736	Dcaf11	14	55797463	55807522	+	8070	protein_coding	DDB1 and CUL4 associated factor 11 [Source:MGI Symbol;Acc:MGI:90168]	-	5505	6040	6003	6731	6365	5965	8544	10295	7076	5441	8378	5989	46.1519347202571	50.7048371211705	43.1582676279066	46.3984957683988	46.0099414194091	45.8444802617266	65.5300999888473	69.239346959931	54.7858092790773	48.8261805831359	64.4518585130078
ENSMUSG00000049577	968.67812800933	799.535192411136	799.966802554527	769.83331052123	750.531238126587	678.192360379245	1597.98224492881	2004.42654410974	1144.79377811323	786.463783169366	1278.19883326286	886.795866589781	794.456172000343	1283.11017502896	-0.692589703992226	7.33301944232444e-05	0.00386541393951196	Zfpm1	8	123008880	123063990	+	3503	protein_coding	zinc finger protein, multitype 1 [Source:MGI Symbol;Acc:MGI:1095400]	zf-C2H2	910	744	864	862	814	694	1634	2355	1167	682	1316	777	17.5754874182141	14.3886081779703	14.310104338364	13.6887872476029	13.5553605824239	12.2876681328216	28.8712136484317	36.4880724056115	20.8153879969747	14.0991132563313	23.3229980356218
ENSMUSG00000022574	2812.36001560511	3085.30314168329	2643.40882094118	2798.01364485269	3074.04317925558	2793.87890248453	3721.1275654554	3967.99853445418	3438.3052204686	3176.99079564751	3387.80967357208	3398.81350155002	2867.83461747039	3515.1742151913	-0.294048420061471	7.45825667392962e-05	0.00389723160167151	Naprt	15	75762805	75766330	-	2344	protein_coding	nicotinate phosphoribosyltransferase [Source:MGI Symbol;Acc:MGI:2442664]	-	2642	2871	2855	3133	3334	2859	3805	4662	3505	2755	3488	2978	76.2572832527766	82.9777344802628	70.6671701412393	74.3533657909861	82.9726183390758	75.649609094933	100.47318726914	107.948051785655	93.4295391678711	85.1160689457567	92.3820281849783
ENSMUSG00000030256	18.0961848089655	21.4928815164284	12.0365375384362	10.7169370374185	10.1423140287377	17.5900035833234	108.553261436412	76.6022883099263	52.9724627404577	13.8380724311325	56.3339911316458	13.6956890593016	15.0124764188849	53.6659608514794	-1.84786588086943	7.48857399441846e-05	0.00389723160167151	Bhlhe41	6	145803969	145811284	-	6720	protein_coding	basic helix-loop-helix family, member e41 [Source:MGI Symbol;Acc:MGI:1930704]	bHLH	17	20	13	12	11	18	111	90	54	12	58	12	0.171153494774017	0.201626081858959	0.112238867095313	0.099336720517801	0.0954883126613396	0.166132030166507	1.02236702007204	0.726897848253283	0.502086192756626	0.129318165419273	0.535830393654271
ENSMUSG00000003379	2.12896291870182	3.22393222746426	3.70355001182652	6.2515466051608	5.53217128840236	2.93166726388722	38.14033509928	76.6022883099263	11.7716583867684	8.07220891816065	21.3680656016588	2.28261484321694	3.9619717192405	26.3728618598352	-2.73317704019192	7.63209377958757e-05	1	Cd79a	7	24596806	24601622	+	1457	protein_coding	CD79A antigen (immunoglobulin-associated alpha) [Source:MGI Symbol;Acc:MGI:101774]	-	2	3	4	7	6	3	39	90	12	7	22	2	0.0928702398063219	0.139491482850948	0.159283076264296	0.267261458084955	0.240225167935684	0.127706159084755	1.65675458408602	3.35261052866305	0.514606758991005	0.347925331807514	0.937414685322314
ENSMUSG00000027978	1.06448145935091	0	0	0	0	0	0	0	15.6955445156912	23.0634540518876	18.4542384741598	9.13045937286776	0.177413576558485	11.0572827357677	-5.46367835068711	7.7766818227012e-05	1	Prss12	3	123240562	123300246	+	2602	protein_coding	protease, serine 12 neurotrypsin (motopsin) [Source:MGI Symbol;Acc:MGI:1100881]	-	1	0	0	0	0	0	0	0	16	20	19	8	0.026001525633707	0	0	0	0	0	0	0	0.384208069613064	0.556634685893871	0.45333049286873
ENSMUSG00000032194	1125.15690253391	1235.84068719463	1053.65997836464	1046.68751732121	1101.82411494014	1084.71688763827	1272.32246061957	1392.4593741671	1278.2059064966	1353.8247528458	1562.78261604859	1406.09074342164	1107.98101466547	1377.61430893322	-0.314751012687003	7.83862887364158e-05	0.00402820250318267	Kank2	9	21678080	21710040	-	5235	protein_coding	KN motif and ankyrin repeat domains 2 [Source:MGI Symbol;Acc:MGI:2384568]	-	1057	1150	1138	1172	1195	1110	1301	1636	1303	1174	1609	1232	13.6604317042489	14.8822001968103	12.6123139030198	12.4539974040579	13.3161299990557	13.1509289973258	15.3820329103732	16.9615977753767	15.551830760083	16.2404841782706	19.0813009741426
ENSMUSG00000097194	30.8699623211765	69.8518649283923	51.8497001655712	44.6539043225772	44.2573703072189	41.0433416944212	100.729602954509	102.987520950012	84.3635517718401	73.8030529660402	75.7595053149719	92.4459011502861	47.0876906232262	88.3481891846099	-0.910617080268041	8.04946907652613e-05	0.0040925645709486	9330175E14Rik	8	95149524	95161731	-	6000	lncRNA	RIKEN cDNA 9330175E14 gene [Source:MGI Symbol;Acc:MGI:2443913]	-	29	65	56	50	48	42	103	121	86	64	78	81	0.32700385354471	0.73391893796661	0.54150936493985	0.463571362416404	0.466677426243056	0.434158372168472	1.06252485977937	1.09454662661428	0.895573001598485	0.772460508104455	0.807071434304088
ENSMUSG00000032812	1050.64320037935	1128.37627961249	1134.21219112187	1082.41064077927	1230.90811166953	1044.65076836515	1735.87422567236	1741.42535424566	1273.30104883545	1312.3105355524	1858.05043163515	1199.5141001105	1111.86686532128	1520.07928267525	-0.451732349112452	8.09715999625883e-05	0.0040925645709486	Arap1	7	100997274	101061793	+	8433	protein_coding	ArfGAP with RhoGAP domain, ankyrin repeat and PH domain 1 [Source:MGI Symbol;Acc:MGI:1916960]	-	987	1050	1225	1212	1335	1069	1775	2046	1298	1138	1913	1051	7.9184681718036	8.43515732003329	8.42797392960457	7.99499809674397	9.2347676395482	7.86223001216473	13.0277490034531	13.1681169787688	9.61714986866242	9.77254600479	14.0832047526085
ENSMUSG00000001123	6285.76301746714	7148.53239236408	6761.75643409226	5979.15778879308	6032.83279000277	5586.78058254776	9248.54228292028	8450.93467365842	9822.46795222599	6861.37758043655	8456.89759971103	6735.99640233319	6299.13716754452	8262.70274854758	-0.391628030151438	8.68077661680209e-05	0.00428213743672342	Lgals9	11	78853800	78875772	-	2137	protein_coding	lectin, galactose binding, soluble 9 [Source:MGI Symbol;Acc:MGI:109496]	-	5905	6652	7303	6695	6543	5717	9457	9929	10013	5950	8707	5902	186.948292499783	210.879181110279	198.2740937975	174.278536530341	178.607299947843	165.925757984301	273.90628180146	252.174480846784	292.761177863087	201.632254177359	252.948813163158
ENSMUSG00000119959	160.736700361988	221.376679619212	211.102350674111	134.854791054183	166.887167200138	147.560585615657	227.864053285442	321.72961090169	258.976484508904	229.481367816281	294.296539877391	264.783321813165	173.753045754215	266.188563033812	-0.617906536945582	8.68142176961515e-05	0.00428213743672342	ENSMUSG00000119959	16	24210357	24212419	-	2063	lncRNA	novel transcript, antisense to Lpp	-	151	206	228	151	181	151	233	378	264	199	303	232	4.95203656060821	6.76478472222477	6.41216684472782	4.07169805476745	5.11806920443488	4.53970737465821	6.99052541059332	9.94472363989368	7.99573681662514	6.98556294441286	9.11826110571381
ENSMUSG00000054191	107.512627394442	225.675255922498	145.364337964191	132.175556794828	148.446596238797	139.742806245291	230.797925216156	230.658001466556	208.946936365139	267.536067001896	240.876375873244	235.109328851345	149.819530093341	235.654105795723	-0.654199619378948	8.77025398393905e-05	0.00430753866865201	Klf1	8	85628557	85631924	+	1534	protein_coding	Kruppel-like factor 1 (erythroid) [Source:MGI Symbol;Acc:MGI:1342771]	zf-C2H2	101	210	157	148	161	143	236	271	213	232	248	206	4.45453255514306	9.27427401301704	5.93804504765016	5.36703220111822	6.12247927193058	5.78177008941064	9.52225415784352	9.58835440685947	8.67577011038828	10.9524224584563	10.0367924835731
ENSMUSG00000068246	2295.02202636057	2545.83181562094	2033.24895649276	1965.66486827985	2720.90624534589	1630.98422114259	3607.68451746779	3956.93375947608	2505.4012933172	2479.32131057791	4093.92711413598	2788.21403098949	2198.60968887377	3238.58033766074	-0.559079947709743	8.80306306653357e-05	0.00430753866865201	Apol9b	15	77613239	77620582	+	1821	protein_coding	apolipoprotein L 9b [Source:MGI Symbol;Acc:MGI:1919148]	-	2156	2369	2196	2201	2951	1669	3689	4649	2554	2150	4215	2443	80.1022903189678	88.1335173763984	69.9667313137157	67.2369402753546	94.5335725455285	56.8455576331042	125.386804680863	138.563787959475	87.6324066542481	85.5019611009359	143.699830844917
ENSMUSG00000022389	5220.21707665687	7235.57856250562	6168.26254469706	6034.52863015308	5423.37191973045	5256.47940414979	6983.59315240919	8210.06303375054	7307.25694358648	6654.95966667216	8684.17611565595	7756.32523725116	5889.73968964881	7599.39569155425	-0.367792634444895	9.86398986709815e-05	0.00473240326358201	Tef	15	81686622	81711064	+	7867	protein_coding	thyrotroph embryonic factor [Source:MGI Symbol;Acc:MGI:98663]	TF_bZIP	4904	6733	6662	6757	5882	5379	7141	9646	7449	5771	8941	6796	42.1742564387228	57.980966756901	49.1320260386418	47.7796114785455	43.6156829344359	42.4074866784254	56.1827520169752	66.5484974497801	59.1619685016934	53.1238431772452	70.5578873200893
ENSMUSG00000061286	618.46372788288	801.684480562779	734.228789844607	721.607093852847	635.277669618204	601.969011518177	856.690603768443	932.845644307547	811.263457154788	917.925471265125	851.808796938851	937.013393140554	685.538462213249	884.591227762551	-0.367681669939697	9.96454086964774e-05	0.00476204244984489	Exosc5	7	25358589	25370793	+	6268	protein_coding	exosome component 5 [Source:MGI Symbol;Acc:MGI:107889]	-	581	746	793	808	689	616	876	1096	827	796	877	821	6.27123777840844	8.06298455239936	7.34029298017085	7.17100818441202	6.41234737319452	6.09539514212277	8.65024173177425	9.49033872248319	8.24385441358039	9.19669199382498	8.68638809931625
ENSMUSG00000061479	463.049434817647	651.23430994778	537.014751714845	429.570559583192	476.68875935067	333.232845661848	633.716337034191	803.472890717449	770.062652801099	663.074303991768	715.830197655568	603.751626030881	481.798443512664	698.318001371826	-0.536698739520931	0.00010704329488219	0.00507608396811993	Snrpa	7	26886430	26895696	-	2964	protein_coding	small nuclear ribonucleoprotein polypeptide A [Source:MGI Symbol;Acc:MGI:1855690]	-	435	606	580	481	517	341	648	944	785	575	737	529	9.92926680803775	13.8509771537766	11.3532183221918	9.02744232074051	10.1751108876375	7.13553137215388	13.5316243295671	17.2859774404235	16.5479899786934	14.04873456984	15.4368225651955
ENSMUSG00000037003	1726.58892706718	1731.25160614831	1581.41585504992	1954.05485315598	1782.28118341363	1864.54037983228	2958.32086346979	2847.9028520557	2465.18146049575	1818.55335199133	2579.70828354571	1876.30940112432	1773.35546744455	2424.32936878044	-0.451568065866009	0.000117193339889268	0.00540893263009376	Tns2	15	102008848	102024836	+	5452	protein_coding	tensin 2 [Source:MGI Symbol;Acc:MGI:2387586]	-	1622	1611	1708	2188	1933	1908	3025	3346	2513	1577	2656	1644	20.1280232669891	20.0182303018942	18.176121383711	22.3248893829881	20.6824895663937	21.7056433837502	34.3417685947539	33.3096628061402	28.7998637540778	20.9470759803866	30.2441126687688
ENSMUSG00000032898	1473.24233974166	1159.54095781131	1176.80301625788	833.24185465929	1359.99210839891	867.773510110619	2045.88669301779	1752.49012922376	1606.83136979388	1263.87728204344	2256.27347239333	1414.07989537289	1145.09896449661	1723.23980697418	-0.590214413171588	0.000117343342270665	0.00540893263009376	Fbxo21	5	118114795	118148266	+	5545	protein_coding	F-box protein 21 [Source:MGI Symbol;Acc:MGI:1924223]	-	1384	1079	1271	933	1475	888	2092	2059	1638	1096	2323	1239	16.8865395966249	13.182745937146	13.2988226749688	9.36004503807766	15.5173400294975	9.93256819491441	23.3514178608397	20.1537071223316	18.4572136215528	14.3138534188878	26.0085585335146
ENSMUSG00000048772	613.141320586125	612.547123218209	490.720376567013	432.249793842547	443.495731620256	404.570082416437	652.297525928712	728.572875481077	621.935951434263	621.56008669837	786.733324424709	777.230354115368	499.454071375098	698.055019680416	-0.484359115803686	0.00011758549195856	0.00540893263009376	Tmem53	4	117109148	117125779	+	1713	protein_coding	transmembrane protein 53 [Source:MGI Symbol;Acc:MGI:1916027]	-	576	570	530	484	481	414	667	856	634	539	810	681	22.7494679197721	22.5425727948791	17.9509609343333	15.7175859481289	16.380023498461	14.9897061194018	24.1002527153127	27.1216775667401	23.1252100767091	22.786570373703	29.3559594856667
ENSMUSG00000030849	357.665770341906	376.125426537497	396.279851265437	338.476594765135	453.638045648994	391.866190939592	663.055056341329	831.560396431089	500.295481437656	427.827072662514	602.19093968311	448.533816692129	385.67531324976	578.910460541305	-0.587509596401132	0.000119650762800785	0.00546301363836148	Fgfr2	7	129764181	132725079	-	10328	protein_coding	fibroblast growth factor receptor 2 [Source:MGI Symbol;Acc:MGI:95523]	-	336	350	428	379	492	401	678	977	510	371	620	393	2.20104626441056	2.2958198321663	2.40434472371489	2.04136575936271	2.77891767176103	2.40812088137044	4.06318494128741	5.13426737330669	3.0853734540686	2.60138865680752	3.72686862650103
ENSMUSG00000108207	69.1912948578093	120.360136491999	86.1075377749665	38.4023577174164	64.5419983646942	79.1550161249551	147.67155384593	95.3272921190194	169.708075075911	119.929961069815	172.887076231603	167.772190976445	76.2930568886401	145.549358219787	-0.934407948270306	0.000122887928919236	0.00556940790769764	1810059H22Rik	5	148890558	148906932	-	5030	lncRNA	RIKEN cDNA 1810059H22 gene [Source:MGI Symbol;Acc:MGI:1917070]	-	65	112	93	43	70	81	151	112	173	104	178	147	0.874281914598183	1.50846773608675	1.07271451873202	0.4755523320216	0.811814608275694	0.998773875195859	1.85807007076012	1.2085098221987	2.14897770507011	1.49731410616669	2.19695236742816
ENSMUSG00000033350	23.4185921057201	9.67179668239277	14.8142000473061	27.6854206799978	18.4405709613412	36.1572295879424	66.5010970961805	136.181845884313	51.991491208227	34.5951810778314	50.506336876648	33.0979152266456	21.6979683441167	62.145644561641	-1.52156183152518	0.000125268785740603	0.00563571877826403	Chst2	9	95281345	95288775	-	7328	protein_coding	carbohydrate sulfotransferase 2 [Source:MGI Symbol;Acc:MGI:1891160]	-	22	9	16	31	20	37	68	160	53	30	52	29	0.203115629554574	0.083203776138304	0.126678734780065	0.235328257121865	0.159210366485759	0.313160085976167	0.57434993692233	1.18504452699225	0.451901934771247	0.296471776616236	0.440541175930179
ENSMUSG00000026638	368.310584935416	382.573290992425	292.580450934295	286.678065750945	335.61839149641	373.298964934973	429.32325919446	669.844454443466	366.883353054281	477.413498874073	650.754725141426	459.946890908213	339.843291507411	509.027696935987	-0.584710309718588	0.0001279471972835	0.00572535720039432	Irf6	1	192835419	192854331	+	7069	protein_coding	interferon regulatory factor 6 [Source:MGI Symbol;Acc:MGI:1859211]	IRF	346	356	316	321	364	382	439	787	374	414	670	403	3.31149604128184	3.4117563173916	2.59357192350392	2.52606717785824	3.0037944396745	3.35162577386893	3.84379010318383	6.04250331837953	3.30573025293371	4.24121141191175	5.88417316107968
ENSMUSG00000024165	261.862439000324	317.020002367319	297.209888449078	208.980272229661	253.557850718442	187.626704888782	427.367344573984	546.429656610807	338.435178619591	287.140002946	445.815550507335	343.53353390415	254.376192942268	398.120211193644	-0.648757422897419	0.000128193553990265	0.00572535720039432	Jpt2	17	25156393	25179663	-	4840	protein_coding	Jupiter microtubule associated homolog 2 [Source:MGI Symbol;Acc:MGI:1196260]	-	246	295	321	234	275	192	437	642	345	249	459	301	3.43871250948983	4.12916884997108	3.8479450888214	2.68948013567203	3.31447035683989	2.46040163684612	5.58842209408151	7.19929240782425	4.45376732968687	3.72564565827756	5.8875681555241
ENSMUSG00000120174	419.405694984259	404.066172508854	481.461501537447	273.281894454172	421.367046466646	428.023420527535	581.88459959158	676.653546737682	574.849317887189	772.625710738234	558.483532770627	431.414205368002	404.600955079819	599.318485515552	-0.567310055335017	0.00013151581093682	0.00578952397822947	4931408D14Rik	19	37235740	37241516	-	3244	lncRNA	RIKEN cDNA 4931408D14 gene [Source:NCBI gene (formerly Entrezgene);Acc:77059]	-	394	376	520	306	457	438	595	795	586	670	575	378	8.21715538266608	7.85222955540488	9.3001872611653	5.2473305881413	8.21792477624371	8.37420147127843	11.3524408000801	13.3010654353622	11.2867930548715	14.9568975540416	11.0041277322596
ENSMUSG00000020089	2189.63836188483	2524.33893410451	2228.61121961661	2329.14764946562	2168.61114505373	2445.98772050324	2921.15848568075	2929.61195958629	2741.8154325848	2509.30380084537	2850.69420640311	2750.55088607641	2314.38917177142	2783.85579519612	-0.266906010826336	0.000132859097396294	0.00582776940793314	Ppa1	10	61484331	61509947	+	2902	protein_coding	pyrophosphatase (inorganic) 1 [Source:MGI Symbol;Acc:MGI:97831]	-	2057	2349	2407	2608	2352	2503	2987	3442	2795	2176	2935	2410	47.9560060891277	54.8367360001135	48.122466331479	49.9928647766499	47.2788295366845	53.4950480229243	63.7075553416992	64.3744608529827	60.1780617890091	54.3011521892863	62.7883862503976
ENSMUSG00000013822	652.527134582109	577.083868716102	532.385314200062	584.073068539309	526.478300946291	527.7001074997	770.630360467504	680.05809288479	726.899905382948	714.967075608515	690.577029217244	705.327986554035	566.707965747262	714.743408352506	-0.335405224550376	0.000136808588575556	0.00593739605966422	Elof1	9	22024285	22028468	-	1702	protein_coding	ELF1 homolog, elongation factor 1 [Source:MGI Symbol;Acc:MGI:1913376]	-	613	537	575	654	571	540	788	799	741	620	711	618	24.3672793333896	21.3747339612078	19.6009663950235	21.3754879685308	19.570564804993	19.6781535144347	28.656278376307	25.4792928493889	27.2027270591839	26.3802979045661	25.9345471296306
ENSMUSG00000115852	147.962922849777	140.778373932606	169.437413041063	132.175556794828	164.121081555937	118.243912976785	272.850089556388	227.253455319448	182.46070499491	159.137832958024	299.152918423223	237.391943694562	145.453210191833	229.707824157759	-0.660108985220764	0.000141254734515083	0.0060358826114214	Gm52969	16	23941449	24201140	-	7593	transcribed_processed_pseudogene	predicted gene, 52969 [Source:MGI Symbol;Acc:MGI:6388851]	-	139	131	183	148	178	121	279	267	186	138	308	208	1.23853283131145	1.16880990637481	1.39832101631191	1.08429176827543	1.36751912734203	0.988375816680496	2.27427998357029	1.90852568191459	1.53057049146232	1.31617382109856	2.51829115648684
ENSMUSG00000040488	1199.67060468848	1142.34665259817	1010.14326572568	1151.17765343604	933.092890643865	1326.09082569832	1590.1585864469	1818.02764255558	1391.99860423536	1293.85977231089	1474.39652651445	1367.28629108695	1127.08698213176	1489.28790385836	-0.402934528402398	0.000141467150522956	0.0060358826114214	Ltbp4	7	27004561	27037117	-	6463	protein_coding	latent transforming growth factor beta binding protein 4 [Source:MGI Symbol;Acc:MGI:1321395]	-	1127	1063	1091	1289	1012	1357	1626	2136	1419	1122	1518	1198	11.7976601966063	11.1425629592141	9.79399301213573	11.0947266499411	9.13425567379647	13.0225439542145	15.5718248791967	17.9377199477363	13.7183548132833	12.5720547263248	14.5816355499781
ENSMUSG00000043648	21.2896291870182	16.1196611373213	9.25887502956629	10.7169370374185	21.2066566055424	2.93166726388722	44.9860362709456	57.0261479640562	41.2008043536893	28.8293175648595	28.1669955658229	37.6631449130795	13.5872377101257	39.6454077720755	-1.55259584716461	0.00014960883057228	1	Pld6	11	59674723	59678471	-	1757	protein_coding	phospholipase D family, member 6 [Source:MGI Symbol;Acc:MGI:2687283]	-	20	15	10	12	23	3	46	67	42	25	29	33	0.770130560033074	0.578369637204982	0.330215483945758	0.379933273693581	0.763629823818319	0.10590089572367	1.62046328582539	2.06967992915676	1.49358973675278	1.03042362883883	1.02469557352211
ENSMUSG00000037580	3419.11444743513	3711.82063788718	3145.23984754367	3492.82839611199	3655.84319308589	3530.70460814151	4712.77627803667	5010.64079200596	4055.33631424171	3805.46991856145	4777.70521338906	3850.77124050698	3492.59185503423	4368.78329279031	-0.323298291318162	0.000159192825158903	0.00654306430115112	Gch1	14	47391352	47426870	-	6251	protein_coding	GTP cyclohydrolase 1 [Source:MGI Symbol;Acc:MGI:95675]	-	3212	3454	3397	3911	3965	3613	4819	5887	4134	3300	4919	3374	34.7641936766733	37.4333609894295	31.5293663762485	34.8045611596972	37.0015996451311	35.8483030976687	47.715617999234	51.1145667209207	41.321375057477	38.2306782426517	48.8535297163754
ENSMUSG00000025137	13579.5899769396	13569.5307453971	11457.8578490883	11282.2554661423	10950.9330653925	11575.1995802481	13378.4560040551	18801.606097403	14709.6681257993	14892.0722813038	15916.2950461083	14145.3641834154	12069.2277805346	15307.2436230142	-0.343003180733292	0.000160558359507134	0.00657325923822205	Pcyt2	11	120500913	120508762	-	4346	protein_coding	phosphate cytidylyltransferase 2, ethanolamine [Source:MGI Symbol;Acc:MGI:1915921]	-	12757	12627	12375	12633	11877	11845	13680	22090	14995	12914	16387	12394	198.59346650919	196.832335934817	165.205568120044	161.701712510072	159.42038056514	169.04233509748	194.82716054198	275.871058200105	215.581028675969	215.188283802511	234.087571134219
ENSMUSG00000025151	1651.01074345326	1754.89377581638	1600.85949261201	1406.59798616118	1550.85201784879	1517.62642027229	1816.06672511187	1755.04353883409	2182.6616592133	2072.2513465621	2147.4905929667	1848.91802300572	1580.30673936065	1970.4053142823	-0.318493132644802	0.000163562544443933	0.00662995105894518	Maged1	X	93579080	93585749	-	4351	protein_coding	MAGE family member D1 [Source:MGI Symbol;Acc:MGI:1930187]	-	1551	1633	1729	1575	1682	1553	1857	2062	2225	1797	2211	1620	24.1173084355326	25.4262954730013	23.0555297299718	20.136747298713	22.5508914887618	22.1377007577121	26.4165407520685	25.7217033121897	31.9517554674407	29.9093211272632	31.5477421856397
ENSMUSG00000049091	12371.4035205763	12880.6838927955	12407.8184271218	11122.3944886675	12258.3695465516	10866.7133248086	14476.7020634524	14985.9610030319	14261.3641355699	13052.7618206658	16021.1928226982	13621.5040768971	11984.5638667536	14403.2476537192	-0.265325632906515	0.000172956125227565	0.00696474468867199	Sephs2	7	126871051	126873227	-	2177	protein_coding	selenophosphate synthetase 2 [Source:MGI Symbol;Acc:MGI:108388]	-	11622	11986	13401	12454	13295	11120	14803	17607	14538	11319	16495	11935	361.184051373762	372.993988500808	357.147795109207	318.235245615098	356.251514808305	316.80826159941	420.866575076079	438.962157828786	417.253537423127	376.527926528809	470.394802616372
ENSMUSG00000047875	45.7727027520892	79.523661610785	112.958275360709	84.8424182128966	110.643425768047	97.7222421295742	197.547376668066	239.169366834325	125.564356125529	117.623615664627	185.513660450765	123.261201533715	88.5771209723502	164.779929546171	-0.895845460460988	0.00017558979758334	0.00704769246378623	Gpr157	4	150171822	150190384	+	4900	protein_coding	G protein-coupled receptor 157 [Source:MGI Symbol;Acc:MGI:2442046]	-	43	74	122	95	120	100	202	281	128	102	191	108	0.593715652459783	1.02310834680432	1.444551221341	1.07851296562184	1.42860436605017	1.26576784888767	2.55157545086705	3.11250735785406	1.6321786075644	1.50748032831609	2.41994731478934
ENSMUSG00000000811	161.801181821339	136.47979762932	151.845550484887	158.967899388375	161.354995911736	175.900035833234	239.599541008297	283.428466746727	221.699566284138	182.201287009912	228.249791654082	210.000565575959	157.724910178148	227.529869713186	-0.531056502412303	0.000182333432919269	0.00724886643608817	Txnrd3	6	89620970	89652511	+	2836	protein_coding	thioredoxin reductase 3 [Source:MGI Symbol;Acc:MGI:2386711]	-	152	127	164	178	175	180	245	333	226	158	235	184	3.62613095706405	3.03377579869023	3.35511041142462	3.49149658011791	3.59963635369071	3.93655586290172	5.3470344662785	6.37291540866348	4.97915910948743	4.03458084495671	5.14434705059837
ENSMUSG00000004035	1104.93175480625	968.254312315099	1034.21634080255	909.153492007671	941.391147576468	882.431846430055	1346.64721619766	1523.53440083076	1373.36014512298	1088.59503124909	1181.07126234623	1086.52466537126	973.396482323016	1266.62212018633	-0.381058620492676	0.000196846988945126	0.00762673412688972	Gstm7	3	107833650	107839133	-	1601	protein_coding	glutathione S-transferase, mu 7 [Source:MGI Symbol;Acc:MGI:1915562]	-	1038	901	1117	1018	1021	903	1377	1790	1400	944	1216	952	43.8643950952304	38.1258422970979	40.4791175585223	35.3715662915603	37.2015655991693	34.9821549092647	53.234813141648	60.6822738362765	54.6374592436941	42.7000343330695	47.1531669684222
ENSMUSG00000061111	358.730251801257	277.258171561926	286.099238413598	199.156413278694	280.296678612386	295.121171231314	478.221124706357	365.137574277315	426.722616520354	336.726429157559	412.79217639568	408.588056935832	282.776987483196	404.697996332183	-0.518886314016779	0.000198842556784516	0.00767982478750762	Mcrip1	11	120433714	120440553	-	1282	protein_coding	MAPK regulated corepressor interacting protein 1 [Source:MGI Symbol;Acc:MGI:2384752]	-	337	258	309	223	304	302	489	429	435	292	425	358	17.7847595854377	13.6338235446095	13.98426513537	9.67641939022073	13.8328722287333	14.61063387507	23.6088025278515	18.1622401523004	21.2009354403734	16.4946227842117	20.5811448205471
ENSMUSG00000100094	1424.27619261152	1277.75180615167	1086.99192847108	936.838912687669	1156.22379927609	1130.64634143917	2784.24446224744	3390.9279625194	2515.21100863951	1116.27117611136	2870.11972058644	1309.07961258492	1168.78816343953	2330.97565711484	-0.996239448541429	0.000201494127382942	0.00773359647661656	1810008I18Rik	7	65452758	65457460	+	3968	lncRNA	RIKEN cDNA 1810008I18 gene [Source:MGI Symbol;Acc:MGI:1920875]	-	1338	1189	1174	1049	1254	1157	2847	3984	2564	968	2955	1147	22.8134292986733	20.300006604582	17.1658624650611	14.7062407008511	18.4354048799393	18.0847219397653	44.4087888906183	54.4938903013106	40.3738485107344	17.6665300177619	46.233252333448
ENSMUSG00000024191	411.954324768803	377.200070613318	263.877938342639	292.036534269655	277.530592968185	307.825062708159	485.066825878023	489.403508646751	375.712096844358	463.57542644294	409.878349268182	493.044806134859	321.737420611793	452.780168869185	-0.494642976483675	0.000204771382516483	0.00780507433476688	Bnip1	17	27000040	27011539	+	5110	protein_coding	BCL2/adenovirus E1B interacting protein 1 [Source:MGI Symbol;Acc:MGI:109328]	-	387	351	285	327	301	315	496	575	383	402	422	432	5.12384741163922	4.65341948925992	3.23588556767942	3.5597926147201	3.43615228226908	3.82331247506482	6.00777835712084	6.10726959263032	4.68308095770563	5.69708520532028	5.12696289743076
ENSMUSG00000027762	358.730251801257	485.739122271282	379.613876212218	461.721370695448	362.357219390355	371.344520092382	471.375423534691	665.588771759582	491.46673764758	521.234061572659	595.392009718946	562.664558852976	403.251060077157	551.286927181072	-0.452001854602734	0.000205262905889082	0.00780507433476688	Sucnr1	3	59989290	59994987	+	1640	protein_coding	succinate receptor 1 [Source:MGI Symbol;Acc:MGI:1934135]	-	337	452	410	517	393	380	482	782	501	452	613	493	13.9024767003239	18.6715587220023	14.5047151323174	17.5365654416547	13.9789808318233	14.3710959428588	18.1909891930023	25.8799272932583	19.087439327886	19.9591548969063	23.2051964928896
ENSMUSG00000032126	818.586242240851	931.71641373717	874.037802791058	737.682499408975	721.948353136508	706.531810596821	1047.39227926484	1069.87862672864	963.314044650546	923.691334778097	1060.63307440961	1000.92660875063	798.417186985231	1010.97266143039	-0.341616635088056	0.000222173646711507	0.0082940326106709	Hmbs	9	44247636	44255525	-	3909	protein_coding	hydroxymethylbilane synthase [Source:MGI Symbol;Acc:MGI:96112]	-	769	867	944	826	783	723	1071	1257	982	801	1092	877	13.3096548218108	15.0258626652589	14.011206021906	11.7547181997222	11.6848434621487	11.4715675575706	16.9580896187843	17.4529865555539	15.696383793566	14.8393339167227	17.3430546128277
ENSMUSG00000062727	0	0	0	0	0	0.977222421295742	4.88978655118974	17.8738672723161	5.88582919338419	2.30634540518876	5.82765425499784	2.28261484321694	0.16287040354929	6.51101625338227	-4.71441165398217	0.000222674264683177	1	H2bc12	13	22220040	22220515	+	476	protein_coding	H2B clustered histone 12 [Source:MGI Symbol;Acc:MGI:2448399]	-	0	0	0	0	0	1	5	21	6	2	6	2	0	0	0	0	0	0.130299631503143	0.650153907835955	2.39448702954023	0.787586184716275	0.304278036280641	0.782551487689808
ENSMUSG00000032310	5573.62492116138	6418.84906488134	6103.4504194901	5638.89503785504	6185.88952898191	4468.83813258543	6165.04288374003	10434.9339408855	7080.65251964118	6969.77581448042	9838.05165814552	6936.86650853628	5731.5911841592	7904.22055423816	-0.463803989508679	0.000228770113018616	0.00848868437490827	Cyp1a2	9	57584220	57590986	-	2013	protein_coding	cytochrome P450, family 1, subfamily a, polypeptide 2 [Source:MGI Symbol;Acc:MGI:88589]	-	5236	5973	6592	6314	6709	4573	6304	12260	7218	6044	10129	6078	175.979462167645	201.017898267778	189.995195533505	174.485221001322	194.419948625476	140.89888836324	193.832034958667	330.557368237638	224.040686429067	217.434394140431	312.385897744129
ENSMUSG00000060938	2809.16657122706	2954.19656443308	2868.39948415964	2776.57977077785	2624.09324779885	2787.03834553546	3223.34729454428	3799.47350017234	3438.3052204686	3150.46782348784	3129.45033493384	3297.23714102687	2803.24566398866	3339.71355243896	-0.253041162465405	0.000233663167140818	0.00864412957476965	Rpl26	11	68792409	68797815	+	1444	protein_coding	ribosomal protein L26 [Source:MGI Symbol;Acc:MGI:106022]	-	2639	2749	3098	3109	2846	2852	3296	4464	3505	2732	3222	2889	123.645501409565	128.971435785439	124.475366980386	119.770916821546	114.972641541529	122.498978771714	141.277543682576	167.786548197367	151.661246405464	137.012775372752	138.524619717013
ENSMUSG00000032301	1630.7855957256	1947.25506538841	1840.66435587778	1730.78533154309	1647.66501539584	1528.37586690654	2075.22541232493	2182.31408029612	1966.84792212255	2015.74588413497	2256.27347239333	2072.61427764098	1720.92187180621	2094.83684148548	-0.283953149395419	0.000238806418504959	0.00875528487187436	Psma4	9	54858074	54865314	+	2370	protein_coding	proteasome subunit alpha 4 [Source:MGI Symbol;Acc:MGI:1347060]	-	1532	1812	1988	1938	1787	1564	2122	2564	2005	1748	2323	1816	43.7337323116976	51.7959538693475	48.6672973553536	45.4886734361009	43.9848396991741	40.9296982562682	55.4179120671459	58.7178062692542	52.8591071005287	53.4122218420327	60.8512477081596
ENSMUSG00000050440	1495.59645038803	4860.61515494028	378.687988709261	2554.20332725141	48.8675130475542	6466.28076171392	27578.3961487102	22884.5080643221	14332.9750574227	17357.5555194506	17265.3970061403	16587.7620656575	2634.04186600841	19334.4323102839	-2.87583985830899	0.000240115066142517	0.00877706322131666	Hamp	7	30641793	30643457	-	410	protein_coding	hepcidin antimicrobial peptide [Source:MGI Symbol;Acc:MGI:1933533]	-	1405	4523	409	2860	53	6617	28200	26887	14611	15052	17776	14534	231.845457138932	747.358053978907	57.8773511133446	388.043150198317	7.5408242655128	1000.98465109365	4257.14435886029	3559.25117715518	2226.63932949894	2658.63008414366	2691.65137264343
ENSMUSG00000003355	34.0634066992292	49.4336274877853	49.997925159658	26.7923425935463	60.853884172426	35.1800071666467	84.1043286804636	43.4079633756249	98.0971532230699	85.334779991984	125.294566482454	87.8806714638522	42.7201988798819	87.3532438695747	-1.03028460083104	0.000245439280468839	0.00891004581307483	Fkbp11	15	98622247	98626079	-	2706	protein_coding	FK506 binding protein 11 [Source:MGI Symbol;Acc:MGI:1913370]	-	32	46	54	30	66	36	86	51	100	74	129	77	0.800070595109008	1.15163810835627	1.15780431211403	0.61672465066484	1.42279703122883	0.82513469528376	1.96708798013102	1.02292202740152	2.3090109874658	1.98039348668686	2.95958312084904
ENSMUSG00000020917	3531.94948212633	4436.13074499082	3504.48419869084	3502.65225506295	3725.91736273899	3388.03013463234	4749.93865582572	6963.99914390908	5412.01994331677	4169.87249258127	5787.83195092202	3568.86830736969	3681.52736304038	5108.75508232076	-0.472979893829952	0.000246211891310601	0.00891004581307483	Acly	11	100367179	100418826	-	5279	protein_coding	ATP citrate lyase [Source:MGI Symbol;Acc:MGI:103251]	-	3318	4128	3785	3922	4041	3467	4857	8182	5517	3616	5959	3127	42.5236801403615	52.9753719543533	41.5990504078965	41.3288929736042	44.6543729742421	40.7335554977428	56.9468317655236	84.1216843813521	65.2987869859801	49.6048706663024	70.0793955297195
ENSMUSG00000070348	602.496505992616	741.504412316779	779.597277489482	687.670126567688	754.219352318855	740.734595342172	961.332035963904	1326.0707242985	1764.76778648303	841.816072893896	840.153488428856	812.610884185231	717.703711671266	1091.12516537557	-0.604828330629782	0.000250855978705892	0.00901960621951669	Ccnd1	7	144483668	144493662	-	4709	protein_coding	cyclin D1 [Source:MGI Symbol;Acc:MGI:88313]	-	566	690	842	770	818	758	983	1558	1799	730	865	712	8.13193434902963	9.92673408753048	10.3741517446687	9.09619747022208	10.1333121327994	9.98368006867401	12.9204593207775	17.9572119953005	23.8702113697522	11.2264315190908	11.4039693332414
ENSMUSG00000035064	269.313809215781	357.856477248533	324.06062603482	244.703395687723	288.59493554499	236.487825953569	420.521643402318	451.102364491788	332.549349426207	345.951810778314	483.695303164821	407.446749514224	286.836178280903	406.877870129612	-0.505995375420822	0.00025115659722152	0.00901960621951669	Eef2k	7	120442054	120506673	+	7408	protein_coding	eukaryotic elongation factor-2 kinase [Source:MGI Symbol;Acc:MGI:1195261]	-	253	333	350	274	313	242	430	530	339	300	498	357	2.31060479668238	3.04529414781793	2.74117186625869	2.05753596061709	2.46473465196539	2.02611705617036	3.59269713433756	3.88306841903481	2.85925254478395	2.93270137559905	4.1734670863457
ENSMUSG00000006587	6.38688875610547	11.8210848340356	1.85177500591326	5.35846851870926	20.2846280574753	1.95444484259148	46.9419508914215	86.8159267512498	36.2959466925359	9.22538162075503	20.3967898924924	18.2609187457355	7.9428816691384	36.3228190990317	-2.19908493993071	0.000252536710874363	1	Snai3	8	123180947	123187472	-	1628	protein_coding	snail family zinc finger 3 [Source:MGI Symbol;Acc:MGI:1353563]	zf-C2H2	6	11	2	6	22	2	48	102	37	8	21	16	0.249346325671642	0.457745699355474	0.0712762414364492	0.205019275761555	0.788306463248406	0.0761948705104373	1.82490374523783	3.40052457757801	1.42004175729147	0.355863256190627	0.800817431505663
ENSMUSG00000062729	536.49865551286	589.979597625959	472.202626507881	468.86599538706	448.105874360591	451.476758638633	708.041092612275	743.042196606285	620.954979902032	544.297515624547	661.438757942255	619.729929933399	494.521584672164	649.584078770132	-0.395754322937007	0.000266004745578403	0.00936018536690479	Ppox	1	171103563	171108760	-	4516	protein_coding	protoporphyrinogen oxidase [Source:MGI Symbol;Acc:MGI:104968]	-	504	549	510	525	486	462	724	873	633	472	681	543	7.55062195045358	8.23577359699535	6.55217424046225	6.46700527728819	6.27782410191888	6.34509578457022	9.92288043994943	10.4920525554787	8.75797232597031	7.56894984136894	9.36185267358936
ENSMUSG00000005338	94.7388498822312	95.6433227481063	124.994812899145	129.496322535474	83.9045978741025	118.243912976785	227.864053285442	258.745507180195	181.479733462679	147.60610593208	156.375389175775	116.413357004064	107.836969819307	181.414024340039	-0.752423660239122	0.000266230132301385	0.00936018536690479	Cadm3	1	173160825	173195261	-	7248	protein_coding	cell adhesion molecule 3 [Source:MGI Symbol;Acc:MGI:2137858]	-	89	89	135	145	91	121	233	304	185	128	161	102	0.830764528587554	0.831874496676367	1.0806493062157	1.11287827070163	0.732402831610757	1.03542185100097	1.98971494509575	2.27643652845178	1.59480407068882	1.27890812600075	1.37903825907368
ENSMUSG00000006476	1097.48038459079	1460.44129904131	1226.80094141753	1306.57324047861	1045.58037350805	1335.86304991128	1675.24087243761	1964.42312688122	1883.46534188294	1688.24483659817	1453.0284609128	1288.53607899596	1245.45654815793	1658.82311961812	-0.414043483411366	0.000266482419034502	0.00936018536690479	Nsmf	2	24944367	24952893	+	4896	protein_coding	NMDA receptor synaptonuclear signaling and neuronal migration factor [Source:MGI Symbol;Acc:MGI:1861755]	-	1031	1359	1325	1463	1134	1367	1713	2308	1920	1464	1496	1129	14.2469985211543	18.804597222787	15.7015911358828	16.622669196451	13.5113409252355	17.3171829701885	21.6555430801693	25.5855373341613	24.5026813022841	21.6544535819723	18.9696277293696
ENSMUSG00000007872	338.50510407359	313.796070139854	308.320538484557	348.300453716102	292.283049737258	480.793431277505	1245.91761324315	880.926315564152	552.286972645883	478.566671576667	592.478182591447	405.164134671007	346.999774571478	692.556648382051	-0.997519653681465	0.000266577132122384	0.00936018536690479	Id3	4	135870808	135873066	+	1791	protein_coding	inhibitor of DNA binding 3 [Source:MGI Symbol;Acc:MGI:96398]	bHLH	318	292	333	390	317	492	1274	1035	563	415	610	355	12.0126177354841	11.0451915931581	10.7874263295627	12.113422535504	10.3250100585601	17.0380409274059	44.0277982585719	31.3649724807447	19.6411359082212	16.7803135920932	21.1447654909373
ENSMUSG00000000056	766.426650732657	1024.13580425781	965.700665583764	989.53051978831	770.815866184062	962.564084976306	1269.38858868886	1362.66959537991	1198.74721238591	961.746033963712	1356.87216570533	1092.23120247931	913.195598587152	1206.94246643384	-0.403083988821942	0.000266737085036368	0.00936018536690479	Narf	11	121128079	121146682	+	4806	protein_coding	nuclear prelamin A recognition factor [Source:MGI Symbol;Acc:MGI:1914858]	-	720	953	1043	1108	836	985	1298	1601	1222	834	1397	957	10.1357257975888	13.4336838160411	12.5912758077462	12.8248956194101	10.1472723766957	12.7116698349071	16.7164499229558	18.0803865953659	15.8869756983037	12.5669488092836	18.0460128961044
ENSMUSG00000021210	15678.7474147796	16770.8954472691	17252.0618425909	12218.2013007436	13721.628852334	14646.6096503806	18670.1830097527	18121.5480045182	16679.4589625186	18567.2336844721	22315.0594180959	19861.0317508306	15048.0240846829	19035.752471698	-0.339165725581098	0.000284280290089086	0.00983529724753284	Akr1c6	13	4484305	4507876	+	2033	protein_coding	aldo-keto reductase family 1, member C6 [Source:MGI Symbol;Acc:MGI:1933427]	-	14729	15606	18633	13681	14882	14988	19091	21291	17003	16101	22975	17402	490.164671763492	520.04414601719	531.758695642834	374.350406840265	427.022470323977	457.252876260351	581.225185355652	568.406228484011	522.566984734864	573.539103587209	701.595452084317
ENSMUSG00000067038	652.527134582109	628.66678435553	501.831026602493	476.903698165124	480.376873542938	477.861764013618	724.66636688632	1007.74565954392	706.299503206103	623.866432103559	663.381309360588	738.42590178068	536.361213543635	744.064195480195	-0.474171380788471	0.000292432396305381	0.0100889176725356	Rps12-ps3	19	59310803	59311198	+	396	processed_pseudogene	ribosomal protein S12, pseudogene 3 [Source:MGI Symbol;Acc:MGI:3704503]	-	613	585	542	534	521	489	741	1184	720	541	683	647	104.730074306639	100.079855177265	79.4096525425863	75.0142750092	76.7484024850481	76.5885440080745	115.818023109226	162.276885288167	113.603340583317	98.9349277662193	107.076493712061
ENSMUSG00000068747	79.8361094513184	124.658712795285	101.847625325229	72.339325002575	90.3587977105719	99.6766869721657	291.431278450909	158.311395840514	148.126701366836	121.08313377241	250.589132964907	94.728515993503	94.7862095428575	177.378359731513	-0.90688330887304	0.000308907831289397	0.0105398745363599	Sort1	3	108191398	108268827	+	7569	protein_coding	sortilin 1 [Source:MGI Symbol;Acc:MGI:1338015]	-	75	116	110	81	98	102	298	186	151	105	258	83	0.670392089763233	1.0382584445151	0.84318597677628	0.595311618798712	0.7552911179122	0.835818167359042	2.43686171274183	1.3337504712038	1.24649985935322	1.00461198661028	2.11616644867684
ENSMUSG00000030122	15263.5996456327	15574.8165908798	14017.0109072604	14074.9106424763	12606.8963377209	12657.9620230437	17018.4131127608	20157.4666004887	16215.4594277735	16182.4725355069	16450.4966861497	16693.9036558671	14032.532691169	17119.7020030911	-0.286982291218093	0.000311510703199693	0.0105398745363599	Ptms	6	124890644	124897066	-	1619	protein_coding	parathymosin [Source:MGI Symbol;Acc:MGI:1916452]	-	14339	14493	15139	15760	13673	12953	17402	23683	16530	14033	16937	14627	599.208739661894	606.453394856279	542.52472486264	541.510908339657	492.655995137531	496.219305982371	665.281491387372	793.944259790175	637.9399449742	627.698713146415	649.468754825312
ENSMUSG00000084910	54.2885544268965	55.8814919427138	96.2923003074894	74.1254811754781	62.6979412685601	70.3600143332934	109.53121874665	84.2625171409189	130.469213786683	108.398234043872	117.524360809123	151.793887073927	68.9409639090719	116.996571933529	-0.757567004170814	0.000319679012235485	0.0107865319458138	C630043F03Rik	4	72119481	72133589	+	4316	lncRNA	RIKEN cDNA C630043F03 gene [Source:MGI Symbol;Acc:MGI:1915535]	-	51	52	104	83	68	72	112	99	133	94	121	133	0.799456546488457	0.816221247043497	1.39804483203059	1.06978006711478	0.919082048903146	1.0346684362548	1.60616335192541	1.24495572156818	1.92541342995127	1.57722618806082	1.74049411047969
ENSMUSG00000019797	279.95862380929	297.676409002533	258.3226133249	221.483365439983	310.723620698599	207.171153314697	379.447436372324	327.687566659129	364.92140998982	416.295345636571	341.88904962654	343.53353390415	262.555964265	362.295723698089	-0.464532762010386	0.000323478883294424	0.0108848428619784	Mtres1	10	43401129	43416990	-	4141	protein_coding	mitochondrial transcription rescue factor 1 [Source:MGI Symbol;Acc:MGI:1915101]	-	263	277	279	248	337	212	388	385	372	361	352	301	4.29691379638062	4.53169347760856	3.9090224795137	3.33153435052214	4.7473524705358	3.17527080759361	5.79935401740675	5.04609759585954	5.61295423408518	6.3131997877711	5.27723041396614
ENSMUSG00000023043	2374.85813581188	2156.81066017359	1824.92426832752	1400.34643955602	2027.54077719947	1462.90196467973	3075.67574069835	2485.31868738872	2740.83446105257	2128.75680898922	3399.46498208207	2117.12526708371	1874.5637076247	2657.86265788244	-0.50416074953298	0.000329454284367634	0.011016350602665	Krt18	15	101936615	101940462	+	1437	protein_coding	keratin 18 [Source:MGI Symbol;Acc:MGI:96692]	-	2231	2007	1971	1568	2199	1497	3145	2920	2794	1846	3500	1855	105.038600137967	94.6186162517416	79.5791051518375	60.6997825694298	89.2678897275992	64.6122957685855	135.461851511285	110.287484246232	121.485214665542	93.0298863492187	151.209786417446
ENSMUSG00000028957	1710.62170517692	2358.84374642802	2124.91181928546	1914.75941735211	1956.5445789983	1604.59921576761	2287.44214864656	2304.02660505523	2029.63010018532	2952.12211864161	3299.42358403794	3030.17120437049	1945.04674716807	2650.46929348952	-0.446243631293526	0.000332733965964372	0.0110749012736434	Per3	4	151088109	151129122	-	9608	protein_coding	period circadian clock 3 [Source:MGI Symbol;Acc:MGI:1277134]	-	1607	2195	2295	2144	2122	1642	2339	2707	2069	2560	3397	2655	11.3158975131288	15.477026216967	13.8585850244248	12.4133680393935	12.8836581297846	10.5996200651337	15.0678175571164	15.2916872900932	13.4549252099069	19.2954331749656	21.9498307686783
ENSMUSG00000031897	1101.73831042819	1361.57404406574	1008.29149071977	904.688101575413	1056.64471608485	939.110746865208	1492.36285542311	1510.7673527791	1189.91846859584	1296.16611771608	1337.446651522	1459.73219223723	1062.0079016232	1381.06560637889	-0.379776489197128	0.00033482164416136	0.0110843111417515	Psmb10	8	106662367	106665076	-	1705	protein_coding	proteasome (prosome, macropain) subunit, beta type 10 [Source:MGI Symbol;Acc:MGI:1096380]	-	1035	1267	1089	1013	1146	961	1526	1775	1213	1124	1377	1279	41.0697528670775	50.3428988623702	37.0572076928884	33.0508708594359	39.2091151374298	34.9582065901886	55.3966211094721	56.5033400714575	44.4518877830851	47.7407777369542	50.1392900986569
ENSMUSG00000069744	1220.9602338755	1270.22929762092	1191.61721630518	1046.68751732121	1224.45391183306	1059.30910468458	1539.30480631453	1255.42639174601	1475.38118447497	1427.62780581184	1675.45059831188	1371.85152077338	1168.87621360674	1457.50705123877	-0.318638532746215	0.000352794760635101	0.0115667878183362	Psmb3	11	97594225	97604326	+	2300	protein_coding	proteasome (prosome, macropain) subunit, beta type 3 [Source:MGI Symbol;Acc:MGI:1347014]	-	1147	1182	1287	1172	1328	1084	1574	1475	1504	1238	1725	1202	33.7397379324542	34.8157398532388	32.4653363048566	28.3463810479318	33.6819359810206	29.2315326354424	42.35747056039	34.8068187047659	40.8576884045739	38.9798685747275	46.5618135175436
ENSMUSG00000008393	2048.06232779115	2093.40665970012	2089.72809417311	1867.42627877018	1957.46660754637	1842.06426414247	2637.55086571175	2463.18913743252	2325.88350291899	2188.72178952413	2809.90062661813	2163.91887136966	1983.0257053539	2431.52746559586	-0.294682700449488	0.000353162793671721	0.0115667878183362	Carhsp1	16	8476444	8490019	-	2858	protein_coding	calcium regulated heat stable protein 1 [Source:MGI Symbol;Acc:MGI:1196368]	CSD	1924	1948	2257	2091	2123	1885	2697	2894	2371	1898	2893	1896	45.5458662353724	46.1756179520576	45.8182533990769	40.6995543238363	43.3325829213615	40.9071544305493	58.4079343996067	54.9586997337626	51.8350022000262	48.0929641920352	62.8426995597171
ENSMUSG00000056394	124.544330744057	79.523661610785	61.1085751951375	90.2008867316059	97.7350260951084	102.608354236053	217.106522872825	165.12048813473	122.621441528837	132.614860798354	153.461562048277	130.109046063366	92.6201391021244	153.505653574398	-0.731825992404419	0.000354757878066035	0.0115881283468272	Lig1	7	13011239	13045350	+	4227	protein_coding	ligase I, DNA, ATP-dependent [Source:MGI Symbol;Acc:MGI:101789]	-	117	74	66	101	106	105	222	194	125	115	158	114	1.87266346221243	1.18600210535632	0.905901299960208	1.32918971196755	1.46285211680163	1.5406613632664	3.25067725331635	2.49097649189296	1.8477004175782	1.97021288218622	2.32056353151073
ENSMUSG00000009145	616.334764964178	710.339734117958	663.861339619903	637.657753726402	644.497955098875	510.110103916377	757.91691543441	703.038779377768	787.720140381251	995.188042338949	904.257685233832	804.621732233971	630.466941907282	825.457215833364	-0.388028880913886	0.000359116073950986	0.0116438140985951	Dqx1	6	83034825	83044299	+	3419	protein_coding	DEAQ RNA-dependent ATPase [Source:MGI Symbol;Acc:MGI:2136388]	-	579	661	717	714	699	522	775	826	803	863	931	705	11.4573870885248	13.0974981797448	12.1671608656	11.6170793599993	11.9262767235996	9.46937994701635	14.0299372097504	13.1123669177357	14.6747339481199	18.2792872137543	16.9051568235675
ENSMUSG00000029551	170.317033496146	178.390916586356	162.956200520367	121.45861975741	158.588910267534	122.152802661968	225.908138664966	198.314813069031	226.604423945291	190.273495928072	249.617857255741	227.120176900086	152.310747214963	219.639817627198	-0.530155746733667	0.000359306753246014	0.0116438140985951	Psmg3	5	139809347	139812640	-	2893	protein_coding	proteasome (prosome, macropain) assembly chaperone 3 [Source:MGI Symbol;Acc:MGI:1913756]	-	160	166	176	136	172	125	231	233	231	165	257	199	3.74177502655544	3.88727837599907	3.52966451889093	2.61510011567083	3.46822145324083	2.67985761300968	4.94215852678951	4.3712700191307	4.98904404462857	4.13031402860034	5.51509900864555
ENSMUSG00000001844	401.309510175294	397.618308053925	400.90928878022	358.124312667069	341.150562784812	356.686183772946	434.213045745649	511.533058602952	472.828278535197	450.890526714402	521.575055822307	480.490424497166	375.966361039044	478.588398319612	-0.349650777982652	0.000371790602089231	0.0119225383155612	Zdhhc4	5	143302244	143315011	-	2864	protein_coding	zinc finger, DHHC domain containing 4 [Source:MGI Symbol;Acc:MGI:1920131]	-	377	370	433	401	370	365	444	601	482	391	537	421	8.90583120687408	8.75214891644755	8.77170621828693	7.78877582383987	7.53625382812198	7.90441968483101	9.59539996492193	11.3894199165794	10.5154488787142	9.88669884783657	11.6404533793859
ENSMUSG00000026730	1038.93390432649	1157.39166965967	987.921965654723	896.650398797349	1072.31920140199	751.484041976425	1399.4569109505	1464.80597979315	1402.7892910899	976.737279097439	1468.56887225946	1220.05763369945	984.116863636108	1322.06932781498	-0.426818345371227	0.000376504062765493	0.0119504329627177	Pter	2	12928852	13008266	+	4682	protein_coding	phosphotriesterase related [Source:MGI Symbol;Acc:MGI:107372]	-	976	1077	1067	1004	1163	769	1431	1721	1430	847	1512	1069	14.1034229872131	15.5836893409793	13.2221538198912	11.928893153338	14.4902244425639	10.1869710196361	18.9173957815424	19.9503081370521	19.0835171654804	13.1008526744275	20.0488287166527
ENSMUSG00000017221	1868.16496116085	2177.2288976142	1781.40755568855	1933.51405716759	2010.02223478619	1902.65205426281	2602.34440254318	2502.34141812426	2362.17944961152	2299.42636897319	2519.4891895774	1993.86406555	1945.4982934467	2379.94081572993	-0.291338939065394	0.000377602511386938	0.0119504329627177	Psmd3	11	98573380	98586805	+	4967	protein_coding	proteasome (prosome, macropain) 26S subunit, non-ATPase, 3 [Source:MGI Symbol;Acc:MGI:98858]	-	1755	2026	1924	2165	2180	1947	2661	2940	2408	1994	2594	1747	23.9050184863256	27.6332056493538	22.4739858381951	24.2471995079086	25.6028988627407	24.3120696773567	33.159184425436	32.1257531001733	30.2911746061094	29.072244057535	32.4223459538307
ENSMUSG00000025470	118.157441987951	117.136204264535	130.550137916885	134.854791054183	164.121081555937	140.720028666587	203.415120529493	193.20799384837	219.737623219677	232.940885924064	146.662632084112	190.598339408615	134.256614241013	197.760432502388	-0.556032307321511	0.000378410034001952	0.0119504329627177	Zfp511	7	139616304	139620515	+	2170	protein_coding	zinc finger protein 511 [Source:MGI Symbol;Acc:MGI:1917002]	-	111	109	141	151	178	144	208	227	224	202	151	167	3.46074315049701	3.40292793640669	3.76988909429817	3.87092768985495	4.78505655940461	4.11578706993153	5.93275927253661	5.6776193222708	6.44973804602059	6.74123081669498	4.32002079333277
ENSMUSG00000034522	1457.2751178514	1573.27892700256	1150.87816617509	1300.32169387345	1504.75059044544	1346.61249654553	2164.21952755658	2262.32091475316	1511.67713116751	1620.2076471451	2379.62548745745	1479.13441840458	1388.85283198224	1902.8641877474	-0.454950279317805	0.000378442483052876	0.0119504329627177	Zfp395	14	65595838	65636379	+	4733	protein_coding	zinc finger protein 395 [Source:MGI Symbol;Acc:MGI:2682318]	-	1369	1464	1243	1456	1632	1378	2213	2658	1541	1405	2450	1296	19.5691997713504	20.9551396937987	15.2371526807273	17.1128646611862	20.1145562969752	18.0577174503684	28.9399672371646	30.4802566143544	20.3432307862646	21.4974714878267	32.1364724608724
ENSMUSG00000009927	2950.74260532073	2898.31507249037	3035.98512219479	2930.18920164751	2503.30750800207	2581.82163706335	3344.61400101378	3628.39505628017	3445.17202119421	3291.15489320436	3200.35346170298	3236.74784768162	2816.72685778647	3357.73954684619	-0.253724747205135	0.000378498487420387	0.0119504329627177	Rps25	9	44318436	44321724	+	2691	protein_coding	ribosomal protein S25 [Source:MGI Symbol;Acc:MGI:1922867]	-	2772	2697	3279	3281	2715	2642	3420	4263	3512	2854	3295	2836	69.6924370142572	67.897414482324	70.6963373004368	67.8250898590066	58.8549429696162	60.8932642814196	78.6620995647943	85.9808594167272	81.5444863139114	76.804706317242	76.0169332542084
ENSMUSG00000026669	706.815689009006	1120.85377108174	757.375977418523	675.167033357367	661.094468964082	518.905105708039	1125.62886408388	1065.62294404475	817.149286348172	950.214306937768	1213.12336074872	1302.23176805526	740.035340923126	1078.99508836976	-0.544489262861685	0.000397599672714368	0.0123360877671293	Mcm10	2	4994525	5017602	-	7692	protein_coding	minichromosome maintenance 10 replication initiation factor [Source:MGI Symbol;Acc:MGI:1917274]	-	664	1043	818	756	717	531	1151	1252	833	824	1249	1141	5.84029691628618	9.18609687146496	6.16997242757964	5.46739391555073	5.43759286622906	4.28159303954867	9.26166724933779	8.834158768718	6.76642882062491	7.75774496243749	10.0807254434758
ENSMUSG00000024414	648.269208744706	764.071937909029	703.674502247038	636.76467563995	646.342012195009	528.677329920996	823.440055220353	857.945629071174	735.728649173024	861.420008838001	891.63110101467	828.589188087749	654.633277776121	833.125771900829	-0.34821672496166	0.000398748318152609	0.0123360877671293	Mrpl27	11	94544593	94550915	+	985	protein_coding	mitochondrial ribosomal protein L27 [Source:MGI Symbol;Acc:MGI:2137224]	-	609	711	760	713	701	541	842	1008	750	747	918	726	41.8299345651101	48.9011821845461	44.7658213220761	40.2671733688808	41.5153395680688	34.065218178846	52.9089309704341	55.5423752801371	47.5750030361608	54.920177622528	57.8595530410897
ENSMUSG00000080921	104.319183016389	144.00230616007	84.2557627690532	73.2324030890265	82.9825693260354	46.9066762221956	111.487133367126	222.146636098786	110.849783142069	182.201287009912	146.662632084112	229.402791743302	89.2831500971284	167.125043907551	-0.906601112802573	0.000405290942013083	0.0124756474932448	Rpl38-ps2	6	140692686	140692898	-	213	processed_pseudogene	ribosomal protein L38, pseudogene 2 [Source:MGI Symbol;Acc:MGI:3646625]	-	98	134	91	82	90	48	114	261	113	158	151	201	31.1280987347077	42.6197779794261	24.7874005078101	21.4156911088142	24.648455611429	13.9769294863089	33.1267151688359	66.506034116244	33.1476413955548	53.7186444896584	44.0114794438127
ENSMUSG00000035875	5532.11014424669	6373.71401369684	5788.64866848485	5578.16572797634	5571.81851596924	6263.01849808441	7709.23747660575	7335.09467394383	6393.97244707969	6145.25733212544	7465.22510065224	7213.06290456553	5851.24592807639	7043.64165582875	-0.267732384540958	0.000421130473061624	0.0127101791874638	AI182371	2	34971873	34991555	-	3050	protein_coding	expressed sequence AI182371 [Source:MGI Symbol;Acc:MGI:2138853]	-	5197	5931	6252	6246	6043	6409	7883	8618	6518	5329	7686	6320	115.281335909906	131.738912113391	118.929152796392	113.920002478145	115.579167491262	130.328852797552	159.972308826499	153.358127540905	133.526759231847	126.529980974036	156.447693418946
ENSMUSG00000001700	740.879095708235	870.46170141535	918.480402932976	689.456282740591	814.151207943214	703.600143332934	1020.00947457818	1209.46501876006	939.770727877009	934.069889101447	1113.08196270459	906.198092757125	789.504805678883	1020.43252762973	-0.371113528073382	0.000421721586357243	0.0127101791874638	Gramd3	18	56533409	56636864	+	5679	protein_coding	GRAM domain containing 3 [Source:MGI Symbol;Acc:MGI:1914815]	-	696	810	992	772	883	720	1043	1421	958	810	1146	794	8.29169834661705	9.66271428750383	10.1346556867469	7.56211498754283	9.07017448874403	7.86340723873166	11.367515770928	13.5807062681466	10.5401655491019	10.3290579035362	12.527989268323
ENSMUSG00000004105	353.407844504503	298.751053078355	212.028238177068	340.262750938038	295.971163929526	433.886755055309	502.670057462306	566.856933493454	468.904392406274	397.844582395061	473.011270363992	398.316290141356	322.384634280467	467.93392104374	-0.539126492115214	0.000421845331080049	0.0127101791874638	Angptl2	2	33106081	33137729	+	6286	protein_coding	angiopoietin-like 2 [Source:MGI Symbol;Acc:MGI:1347002]	-	332	278	229	381	321	444	514	666	478	345	487	349	3.57330288578375	2.99610070860351	2.1136365035321	3.37169625989151	2.97891055170261	4.38085353490299	5.0610644513769	5.75042573941127	4.75124375427205	3.97458949395537	4.80975780741197
ENSMUSG00000015542	590.787209939756	573.859936488638	600.900989418852	492.0860256348	601.162613339723	480.793431277505	802.902951705356	641.756948729827	680.794243368105	681.525067233278	710.973819109737	721.306290456553	556.598367683212	706.543220100476	-0.344214280394398	0.000422165340167135	0.0127101791874638	Nat9	11	115073658	115078685	-	2066	protein_coding	N-acetyltransferase 9 (GCN5-related, putative) [Source:MGI Symbol;Acc:MGI:1913426]	-	555	534	649	551	652	492	821	754	694	591	732	632	18.1747643673246	17.5104347102913	18.2256730317019	14.836078646163	18.4095886925504	14.7701506781142	24.5960838883504	19.8080250046122	20.9885745888926	20.7159438660031	21.9962875087718
ENSMUSG00000034412	425.792583740365	415.887257342889	349.985476117606	313.470408344492	364.201276486489	296.09839365261	604.377617727052	811.984256085219	621.935951434263	336.726429157559	596.363285428112	381.196678817229	360.905899280742	558.764036441572	-0.632892301679403	0.000423927324585865	0.0127302577030895	Tbc1d10a	11	4136789	4165505	+	2733	protein_coding	TBC1 domain family, member 10a [Source:MGI Symbol;Acc:MGI:2144164]	-	400	387	378	351	395	303	618	954	634	292	614	334	9.90208118535024	9.5930635478537	8.0245624881317	7.14439289607719	8.43110059302997	6.876273418381	13.9959366820554	18.9456229516201	14.4945059866091	7.73732396976197	13.9475318940221
ENSMUSG00000023070	22211.4701308161	24908.1003893889	26009.1058455547	20798.89555537	22278.0537783963	22293.3750970198	24232.8041903861	26389.4883227696	30254.143025527	27846.8144222491	29448.1082262133	28694.7511940802	23083.1667994243	27811.0182302042	-0.268813444024166	0.000452163829628432	0.0134141936123102	Rgn	X	20416026	20428328	+	1607	protein_coding	regucalcin [Source:MGI Symbol;Acc:MGI:108024]	-	20866	23178	28091	23289	24162	22813	24779	31005	30841	24148	30319	25142	878.475086333144	977.115876359587	1014.19278850511	806.181465536949	877.089294717231	880.474259425668	954.379329528208	1047.16714039843	1199.13027057346	1088.21035020845	1171.29858870641
ENSMUSG00000032633	807.941427647342	800.609836486957	744.41355237713	776.977935212843	845.500178577494	679.169582800541	1098.24605939722	1412.88665104975	1256.62453278753	772.625710738234	1145.13406110708	786.360813488236	775.768752183718	1078.64630476134	-0.476678500579538	0.000472436979002917	0.0138483794179328	Flcn	11	59682234	59700842	-	4322	protein_coding	folliculin [Source:MGI Symbol;Acc:MGI:2442184]	-	759	745	804	870	917	695	1123	1660	1281	670	1179	689	11.8812774182021	11.6777049539414	10.7929578587535	11.1977904294939	12.3768856971565	9.97355948493051	16.0822985250298	20.8460354692658	18.5190267487219	11.2263247721682	16.9354860827345
ENSMUSG00000117375	0	0	0.925887502956629	0.893078086451543	2.76608564420118	0	11.7354877228554	21.278413419424	4.90485766115349	8.07220891816065	3.88510283666523	5.70653710804235	0.764175205601559	9.26376794438351	-3.5558222496393	0.000476749130423478	1	Gm33373	17	80860893	80871371	+	426	lncRNA	predicted gene, 33373 [Source:MGI Symbol;Acc:MGI:5592532]	-	0	0	1	1	3	0	12	25	5	7	4	5	0	0	0.136194508284671	0.130583482370818	0.410807593523817	0	1.74351132467557	3.18515489062471	0.733354898131743	1.18996997287218	0.582933502567055
ENSMUSG00000030805	535.434174053509	557.740275351317	429.611801371876	495.658337980607	485.909044831341	404.570082416437	647.407739377522	690.271731326113	634.688581353262	517.774543464876	720.6865762014	602.610318609272	484.820619334181	635.573248388741	-0.392445264844042	0.000486039136331289	0.0141557684527853	Stx4a	7	127423466	127448191	+	2364	protein_coding	syntaxin 4A (placental) [Source:MGI Symbol;Acc:MGI:893577]	-	503	519	464	555	527	414	662	811	647	449	742	528	14.395496090757	14.8732498557076	11.3877966521071	13.0600053878733	13.0043889398314	10.8618301956579	17.3325971409478	18.6197364220367	17.1005705357756	13.7545514014475	19.4861058262929
ENSMUSG00000068522	8.5158516748073	5.3732203791071	11.1106500354795	30.3646549393525	11.9863711248718	17.5900035833234	55.7435666835631	85.1136536776959	42.18177588592	28.8293175648595	33.9946498208207	14.8369964809101	14.1567919561569	43.4499933522949	-1.61467895215283	0.000493077968811244	1	Aard	15	51903503	51909118	+	1348	protein_coding	alanine and arginine rich domain containing protein [Source:MGI Symbol;Acc:MGI:2181621]	-	8	5	12	34	13	18	57	100	43	25	35	13	0.401519108005374	0.251284731100186	0.516488372664122	1.40309433134935	0.562574790537809	0.828195283916118	2.61720709605417	4.02633822969177	1.99311498872066	1.34306699990342	1.61193221870823
ENSMUSG00000040706	4256.8613559443	4455.4743383556	3718.36421187382	3471.39452203715	3831.9506457667	3541.45405477577	4749.93865582572	4722.10550603857	4609.58522995205	4488.14815849732	4905.91360699902	4457.94678880268	3879.24985479222	4655.60632435256	-0.263547191517931	0.000496433971734828	0.0144141892218609	Agmat	4	141473983	141486574	+	1407	protein_coding	agmatine ureohydrolase (agmatinase) [Source:MGI Symbol;Acc:MGI:1923236]	-	3999	4146	4016	3887	4156	3624	4857	5548	4699	3892	5051	3906	192.29297997578	199.627877107402	165.603229485108	153.680331404057	172.3091136697	159.751237764092	213.661922452167	214.014156529842	208.672461670614	200.320915347984	222.870144588593
ENSMUSG00000041939	277.829660890588	360.005765400175	251.841400804203	185.760241981921	248.025679430039	161.241699513797	573.082983799438	449.400091418234	474.790221599658	267.536067001896	475.92509749149	241.957173380996	247.450741336787	413.781939115285	-0.744070993234406	0.000507188779767134	0.0146097388200417	Mvk	5	114582330	114598652	+	2675	protein_coding	mevalonate kinase [Source:MGI Symbol;Acc:MGI:107624]	-	261	335	272	208	269	165	586	528	484	232	490	212	6.60119928651003	8.48412402768016	5.89948787437808	4.3255107311826	5.86617886258795	3.82569460121751	13.5589779765331	10.7129797269299	11.3051249582352	6.28075366402688	11.3721064790511
ENSMUSG00000070473	1875.61633137631	2014.95764216516	1698.07768042246	1466.43421795343	2226.69894358195	1530.33031174913	2461.51854986892	2119.32997657463	2181.68068768107	2324.79616843027	2319.40639348914	2391.03904826974	1802.01918787474	2299.62847071896	-0.351843515463415	0.000507926923640921	0.0146097388200417	Cldn3	5	135015068	135016326	+	1259	protein_coding	claudin 3 [Source:MGI Symbol;Acc:MGI:1329044]	-	1762	1875	1834	1642	2415	1566	2517	2490	2224	2016	2388	2095	94.686114860581	100.893114830138	84.5167515573317	72.5513115572107	111.89694046634	77.1464893697749	123.740142294995	107.343008695195	110.372999365777	115.961108841733	117.754419570976
ENSMUSG00000113986	48.966147130142	89.1954582931778	64.812125206964	59.8362317922534	37.8031704707495	45.9294538008999	161.362956189262	142.139801641752	139.297957576759	86.4879526945784	114.610533681624	45.6522968643388	57.7570977823644	114.925249774719	-0.997375452130345	0.000522593572146305	0.0148920980350369	Gm31333	12	29189166	29249767	+	3131	lncRNA	predicted gene, 31333 [Source:MGI Symbol;Acc:MGI:5590492]	-	46	83	70	67	41	47	165	167	142	75	118	40	0.993987418125089	1.79589529571467	1.29713198244934	1.19039085079141	0.76388432114202	0.931032691149252	3.26177501893554	2.89489989433182	2.8337339187343	1.7347055086584	2.33973980413931
ENSMUSG00000038502	948.452980281663	1139.1227203707	1011.9950407316	928.801209909605	940.469119028401	971.359086767967	1305.57300916766	1603.54123528779	1226.21441528837	1275.40900906938	1121.82344408708	1069.40505404714	990.033359514989	1266.9943611579	-0.356861879229458	0.000525190647013165	0.0149314618671659	Ptov1	7	44512491	44519212	-	4213	protein_coding	prostate tumor over expressed gene 1 [Source:MGI Symbol;Acc:MGI:1933946]	-	891	1060	1093	1040	1020	994	1335	1884	1250	1106	1155	937	14.3084426778364	17.0451329966501	15.0521278325402	13.7321875218531	14.12327838737	14.633393982417	19.6129504995697	24.271107075596	18.5384041421862	19.0112743731499	17.0199840534102
ENSMUSG00000109644	3293.50563523172	4286.75521845164	3758.17737450096	3203.47109610169	3051.91449410197	2973.68782800294	4589.55365694669	4148.4394802509	4189.72941415731	4079.92502177891	4601.90431002996	4061.91311350455	3427.91860773182	4278.57749944472	-0.320014824302465	0.00053741324347124	0.0151735849570431	0610005C13Rik	7	45217213	45224751	-	3588	lncRNA	RIKEN cDNA 0610005C13 gene [Source:MGI Symbol;Acc:MGI:1918911]	-	3094	3989	4059	3587	3310	3043	4693	4874	4271	3538	4738	3559	58.3410173490562	75.3177937625112	65.6350487425601	55.6130594310248	53.8148787926601	52.6016852408289	80.9564108021008	73.7281331451668	74.3756764763772	71.4090007753334	81.9806289283245
ENSMUSG00000008090	971.871572387383	1089.68909288292	919.406290435933	911.832726267026	824.293521971952	850.183506527295	1382.83163667646	1101.37067858938	1074.16382779262	1002.10707855451	1311.22220737451	1238.31855244519	927.879451745418	1185.00233023878	-0.353533067440505	0.000550884123435632	0.0154351435589936	Fgfrl1	5	108840248	108854790	+	2782	protein_coding	fibroblast growth factor receptor-like 1 [Source:MGI Symbol;Acc:MGI:2150920]	-	913	1014	993	1021	894	870	1414	1294	1095	869	1350	1085	22.2034149299428	24.6925997820542	20.7091044232799	20.4158027761531	18.7459390304319	19.3960040970818	31.4590359326887	25.2451117545295	24.5929589742282	22.6209173327228	30.1262632392446
ENSMUSG00000042439	31.9344437805274	38.6871867295711	66.6639002128773	66.9808564838658	47.9454844994871	39.0888968518297	85.0822859907015	78.3045613834802	80.4396656429173	87.6411253971728	98.098846625797	82.1741343558099	48.5501280930264	85.2901032326464	-0.806695795244746	0.000581934126147772	0.0161703957858528	Zfp532	18	65712983	65822514	+	8970	protein_coding	zinc finger protein 532 [Source:MGI Symbol;Acc:MGI:3036282]	zf-C2H2	30	36	72	75	52	40	87	92	82	76	101	72	0.226274146150186	0.271891759884723	0.465703228328586	0.465121768310774	0.338172048002215	0.276578036100316	0.600316022994483	0.556667070115334	0.571182905273981	0.613576490551197	0.699032800486347
ENSMUSG00000060126	15860.7737443286	14070.3148847298	14286.4441706208	14323.1863505099	13815.6757642368	13625.4122201265	17034.0604297246	18699.4697129898	16909.0063010606	15637.0218471798	15693.8729087092	16586.6207582359	14330.3011890921	16760.00865965	-0.22604394435596	0.000584587789456978	0.0162066796186079	Tpt1	14	76082533	76085965	+	2380	protein_coding	tumor protein, translationally-controlled 1 [Source:MGI Symbol;Acc:MGI:104890]	-	14900	13093	15430	16038	14984	13943	17418	21970	17237	13560	16158	14533	423.560482568778	372.690393851202	376.147486540601	374.861723215174	367.263369476153	363.353552409664	452.975230667466	501.017905133321	452.520768865148	412.60101719655	421.48223126973
ENSMUSG00000052562	1917.13110829099	2062.2419815013	1905.47648108474	2077.29962908629	1704.83078537599	1788.31703097121	2152.48403983373	2849.60512512926	2002.16289728286	2560.04339975952	2957.5345344114	2163.91887136966	1909.21616938509	2447.62481129774	-0.358667691807143	0.000587972908491368	0.0162280522743617	Slc22a30	19	8312735	8382475	-	3368	protein_coding	solute carrier family 22, member 30 [Source:MGI Symbol;Acc:MGI:2442750]	-	1801	1919	2058	2326	1849	1830	2201	3348	2041	2220	3045	1896	36.1782664571641	38.6001400134641	35.4521422117687	38.4180637403999	32.025184127205	33.6999415112107	40.4483756262436	53.9527410028945	37.8638450035044	47.7340686607006	56.1285519243548
ENSMUSG00000028066	397.05158433789	410.514036963782	337.023051076213	353.658922234811	363.279247938422	259.941164064667	490.93456973945	589.837619986432	521.876855146732	419.754863744354	416.677279232346	455.38166122178	353.578001102631	482.410474845182	-0.450170538679193	0.000594527569534251	0.0163721695269499	Pmf1	3	88301450	88317638	-	4063	protein_coding	polyamine-modulated factor 1 [Source:MGI Symbol;Acc:MGI:1914287]	-	373	382	364	396	394	266	502	693	532	364	429	399	6.21109443703957	6.36945873954248	5.19785016801727	5.42183390155736	5.65687010644118	4.06055085956237	7.647333329324	9.25734734433125	8.18122999130658	6.48786976102991	6.55509656215479
ENSMUSG00000064068	553.530358862474	668.428615160923	514.793451643886	478.689854338027	454.560074197061	457.340093166407	754.983043503696	703.889915914545	592.506805467342	657.308440478796	704.174889145573	666.523534219347	521.22374122813	679.897771454883	-0.384883947805769	0.000601537384810963	0.0165281480095039	Mtx1	3	89116388	89134395	-	3584	protein_coding	metaxin 1 [Source:MGI Symbol;Acc:MGI:103025]	-	520	622	556	536	493	468	772	827	604	570	725	584	9.81615631792156	11.7573208984005	9.0006937651434	8.31945034336583	8.02427354693871	8.09893647061721	13.332218572561	12.5238441771972	10.5298632092015	11.517399107654	12.558524851272
ENSMUSG00000025764	500.306285894929	554.516343123852	552.754839265108	572.463053415439	630.667526877869	546.26733350432	889.941152316533	934.547917381101	735.728649173024	565.054624271245	905.228960942998	578.642862755494	559.495897013586	768.190694473399	-0.458442461258907	0.000605166379865823	0.0165424197207076	Jade1	3	41510166	41571299	+	8492	protein_coding	jade family PHD finger 1 [Source:MGI Symbol;Acc:MGI:1925835]	-	470	516	597	641	684	559	910	1098	750	490	932	507	3.74450138465445	4.11647710414259	4.07881061422209	4.19900014096442	4.69864813280515	4.08274224551133	6.63261108615691	7.01766288167653	5.51829698429326	4.17862748363735	6.81356731015082
ENSMUSG00000039217	156.478774524584	206.331662557712	139.809012946451	123.244775930313	141.992396402327	119.22113539808	224.930181354728	340.454614710783	267.805228298981	161.444178363213	186.484936159931	220.272332370435	147.846292959911	233.565245209678	-0.663895230541082	0.000607444332685159	0.0165424197207076	Il18	9	50466127	50493140	+	1031	protein_coding	interleukin 18 [Source:MGI Symbol;Acc:MGI:107936]	-	147	192	151	138	154	122	230	400	273	140	192	193	9.64638947210389	12.6161996051262	8.49742768178441	7.44591829448657	8.71342430182234	7.33924364757566	13.807730325874	21.0572412555752	16.5446572149225	9.8336994848409	11.5614202332601
ENSMUSG00000001604	1768.10370398187	1726.95302984502	1651.78330527463	1446.7865000515	1691.00035715499	1454.10696288806	1825.84629821425	2323.6027454011	1856.97911051271	2019.20540224276	1839.59619316099	2120.54918934854	1623.12230986601	1997.62982314672	-0.299876045680283	0.00063984906537465	0.0173097493853116	Tcea3	4	135975040	136002209	+	1400	protein_coding	transcription elongation factor A (SII), 3 [Source:MGI Symbol;Acc:MGI:1196908]	-	1661	1607	1784	1620	1834	1488	1867	2730	1893	1751	1894	1858	80.2689754784872	77.7631472513633	73.9326051315837	64.370194895535	76.4184285473005	65.92118957007	82.5409395232215	105.836326705678	84.4843700345149	90.5744430596585	83.9886426687881
ENSMUSG00000055839	1468.98441390426	1336.85723032185	1111.99089105091	1129.7437793612	1083.3835439788	1109.14744817067	1658.61559816356	1978.89244800643	1551.89696398897	1482.98009553637	1379.21150701616	1349.02537234121	1206.68455113128	1566.77033084212	-0.377807289011914	0.000651008902021063	0.0175729479881818	Elob	17	24043712	24048110	-	1398	protein_coding	elongin B [Source:MGI Symbol;Acc:MGI:1914923]	-	1380	1244	1201	1265	1175	1135	1696	2325	1582	1286	1420	1182	66.784862792911	60.2836024318563	49.843098351683	50.3362895671031	49.0295042771451	50.3545628869012	75.0882187668577	90.2642821579184	70.7054840068272	66.6164306211326	63.0593945588096
ENSMUSG00000060992	2979.4836047232	3004.70483599669	2342.49538248027	2382.73233465272	2433.23333834897	2367.80992679958	3722.10552276563	3695.63484268555	3323.53155119761	2870.24685675741	3254.74490141629	2765.38788255732	2585.07657050024	3271.94192622997	-0.340544157572092	0.000660672828892451	0.0177557629856829	Copz1	15	103181141	103208295	+	3662	protein_coding	coatomer protein complex, subunit zeta 1 [Source:MGI Symbol;Acc:MGI:1929063]	-	2799	2796	2530	2668	2639	2423	3806	4342	3388	2489	3351	2423	51.7119222248052	51.7255140248198	40.0840298031273	40.5289479495456	42.0385625291994	41.0379080816184	64.3285214666551	64.353419114685	57.806789962576	49.2214177192788	56.8099898406293
ENSMUSG00000040883	8058.1246472864	7770.75131226468	7018.22727241125	6790.96576937754	6849.75008359019	6416.44241822784	8445.63933121492	8646.69607711712	7943.9074680042	8802.16723890289	8024.67990913203	8964.96979673453	7150.71025052632	8471.34330351762	-0.244573221029414	0.000662221567494767	0.017758526838364	Tmem205	9	21832304	21838852	-	2589	protein_coding	transmembrane protein 205 [Source:MGI Symbol;Acc:MGI:3045495]	-	7570	7231	7580	7604	7429	6566	8636	10159	8098	7633	8262	7855	197.819888227391	189.213578409361	169.865957053636	163.383390026157	167.388306274607	157.296467011984	206.458947430046	212.970306920399	195.433726776376	213.506339019456	198.11700954394
ENSMUSG00000084319	673.816763769127	632.965360658816	608.308089442505	650.160846936723	600.240584791656	640.080685948711	814.638439428211	805.175163791003	876.007578282014	710.354384798137	682.806823543914	794.349965439495	634.262055257923	780.555392547129	-0.300125849475603	0.000674287307005445	0.0180426943456228	Tpt1-ps3	6	99854777	99855295	-	519	processed_pseudogene	tumor protein, translationally-controlled, pseudogene 3 [Source:MGI Symbol;Acc:MGI:2664997]	-	633	589	657	728	651	655	833	946	893	616	703	696	82.5168185345033	76.883637965733	73.4458407856073	78.0300466680098	73.1712438545833	78.2751813295758	99.3415127892943	98.929069772809	107.507284638721	85.952975612779	84.0923696925706
ENSMUSG00000021636	222.476625004341	195.585221799498	134.253687928711	208.08719414321	171.497309940473	154.401142564727	299.254936932812	374.500076181862	253.09065531552	219.102813492932	260.30189005657	215.707102684001	181.050196896827	270.326245777283	-0.581729719738417	0.00069110908102198	0.0182935382179137	Marveld2	13	100732465	100753479	-	3382	protein_coding	MARVEL (membrane-associating) domain containing 2 [Source:MGI Symbol;Acc:MGI:2446166]	-	209	182	145	233	186	158	306	440	258	190	268	189	4.1809868915054	3.64572387872237	2.4875028908173	3.83248234570156	3.20823481967802	2.89756791427805	5.60016662328527	7.06121150441983	4.76650326102091	4.06843666487599	4.91960024549642
ENSMUSG00000019312	2291.82858198251	2559.80218860662	2098.06108169972	2289.85221366176	2360.39308305167	2169.43377527655	3028.73378980693	3755.21440025994	2961.55305580448	2623.46789840221	4433.87361234419	2097.72304091637	2294.89515404647	3150.09429958902	-0.457346553940482	0.000703293787028175	0.0185361680091846	Grb7	11	98337220	98346199	+	3365	protein_coding	growth factor receptor bound protein 7 [Source:MGI Symbol;Acc:MGI:102683]	-	2153	2382	2266	2564	2560	2220	3097	4412	3019	2275	4565	1838	43.2877571357336	47.9559696487315	39.0700558571546	42.3868162818066	44.3794283500083	40.9183437153049	56.9651522509566	71.1623992723665	56.0572561282524	48.9602801617097	84.2217647182115
ENSMUSG00000036867	238.443846894604	170.868408055606	155.549100496714	104.490136114831	175.185424132741	230.624491425795	393.138838715655	321.72961090169	272.710085960134	193.733014035856	237.962548745745	301.305159304636	179.193567853382	286.763209610619	-0.680788697378008	0.000716437727906004	0.018683003205715	Smad6	9	63860358	63929341	-	3205	protein_coding	SMAD family member 6 [Source:MGI Symbol;Acc:MGI:1336883]	MH1	224	159	168	117	190	236	402	378	278	168	245	264	4.72852955149917	3.36089603657817	3.04123824303192	2.03074631149027	3.45821805718333	4.56703257551858	7.76338537112173	6.40123708864295	5.41964142751614	3.7960227777364	4.74576986450262
ENSMUSG00000029482	1207.12197490393	1263.78143316599	1047.17876584395	983.278973183149	989.336632075955	1292.86526337427	1017.07560264747	2035.06745943371	1794.19693244995	1966.15945792342	1339.38920294034	1386.68851725429	1130.59384042454	1589.76286210819	-0.492070185424105	0.000716592843030684	0.018683003205715	Aacs	5	125552878	125594474	+	3854	protein_coding	acetoacetyl-CoA synthetase [Source:MGI Symbol;Acc:MGI:1926144]	-	1134	1176	1131	1101	1073	1323	1040	2391	1829	1705	1379	1215	19.9070756716551	20.6719573122526	17.0262924905563	15.8918132855359	16.2410767500908	21.291108546923	16.7022413355014	33.6719302161292	29.6521225894624	32.0376191858644	22.2137141811772
ENSMUSG00000030062	2092.77054908389	2334.12693268412	2336.94005746253	2121.06045532242	1948.2463220657	2121.54987663306	2365.6787334656	2539.79142574244	2746.72029024596	2596.94492624254	2611.7603819482	2448.10441935017	2159.11569887529	2551.50002949915	-0.24106042252114	0.000717991981199925	0.018683003205715	Rpn1	6	88061464	88082286	+	4512	protein_coding	ribophorin I [Source:MGI Symbol;Acc:MGI:98084]	-	1966	2172	2524	2375	2113	2171	2419	2984	2800	2252	2689	2145	29.479529350188	32.6119462615278	32.4555859875613	29.2814357909298	27.3185228737693	29.8428896269552	33.1833251885755	35.8946625397508	38.7741898267528	36.1448858097414	36.9990297129653
ENSMUSG00000019838	2512.17624406815	2777.95493599837	2101.76463171155	2978.4154183159	2681.25901777901	3030.36672843809	3834.570613443	4255.68268388479	3350.99875410007	2547.35850003098	3676.27855919447	3393.10696444198	2680.32282938518	3509.66601251588	-0.389216683939935	0.000720160119492072	0.0186998025107857	Slc16a10	10	39909528	40018254	-	7356	protein_coding	solute carrier family 16 (monocarboxylic acid transporters), member 10 [Source:MGI Symbol;Acc:MGI:1919722]	-	2360	2585	2270	3335	2908	3101	3921	5000	3416	2209	3785	2973	21.7058304091105	23.80700783842	17.904134502643	25.2203995702889	23.0610718378672	26.1462967469593	32.9919699012886	36.8916798098458	29.0154916106493	21.7471102977511	31.9442566909375
ENSMUSG00000023031	370.439547854117	520.127732697567	351.837251123519	308.111939825782	284.906821352722	373.298964934973	692.393775648468	800.919481107118	479.695079260812	450.890526714402	527.402710077305	388.04452334688	368.120376298113	556.557682692497	-0.598678840837294	0.000724108735625059	0.0187570946293994	Cela1	15	100572302	100585802	-	2306	protein_coding	chymotrypsin-like elastase family, member 1 [Source:MGI Symbol;Acc:MGI:95314]	-	348	484	380	345	309	382	708	941	489	391	543	340	10.2100075694792	14.2190979775505	9.56078360846595	8.32257346228931	7.81674570192457	10.2743463120032	19.0032149325221	22.1477935886412	13.2496177146068	12.2790570252402	14.6187133506945
ENSMUSG00000042682	1075.12627394442	926.343193358063	980.51486563107	875.216524722512	875.00509211564	881.454624008759	1169.63694304459	1260.53321096668	1174.22292408015	1101.27993097763	999.44270473213	1169.84010714868	935.610095630078	1145.82597015831	-0.29314344349377	0.000726073611601988	0.0187570946293994	Selenok	14	29690265	29697619	+	1891	protein_coding	selenoprotein K [Source:MGI Symbol;Acc:MGI:1931466]	-	1010	862	1059	980	949	902	1196	1481	1197	955	1029	1025	36.1356580623451	30.8817373564114	32.4917891594377	28.8291867901476	29.2753091951785	29.5845623401044	39.1464853638686	42.5073153130508	39.5509038990095	36.5729005109609	33.7825532237281
ENSMUSG00000024833	146.898441390426	179.465560662177	141.660787952364	172.364070685148	210.22250895929	134.856694138812	249.379114110677	276.619374452512	210.9088794296	224.868677005904	283.612507076562	184.891802300572	164.244677298036	238.380059062638	-0.538840464878457	0.000726948139032251	0.0187570946293994	Pola2	19	5990570	6014230	-	8294	protein_coding	polymerase (DNA directed), alpha 2 [Source:MGI Symbol;Acc:MGI:99690]	-	138	167	153	193	228	138	255	325	215	195	292	162	1.12569614401362	1.36407556128164	1.07027799143697	1.29446741663418	1.60360581720848	1.0319655406533	1.90295831524302	2.12676486427293	1.61967627489478	1.70262161367067	2.18568435770802
ENSMUSG00000025127	7101.15581532993	7379.58086866569	7015.44960990238	6397.1183332524	7032.31173610747	6489.73409982502	7858.86494507216	7958.12661886456	8404.96408815263	8474.66619136609	7574.97925578803	7633.06403571745	6902.55841051382	7984.11085582682	-0.210060641117669	0.000731431150509362	0.0188332020766373	Gcgr	11	120421525	120429812	+	2621	protein_coding	glucagon receptor [Source:MGI Symbol;Acc:MGI:99572]	-	6671	6867	7577	7163	7627	6641	8036	9350	8568	7349	7799	6688	172.198769119191	177.494955431575	167.725641446118	152.028767752249	169.751465564469	157.150801197516	189.769333720259	193.617557342194	204.251958094172	203.052709154174	184.73131559116
ENSMUSG00000033767	846.262760183975	799.535192411136	781.449052495395	651.053925023175	611.304927368461	762.233488610679	766.718531226552	993.276338418711	1034.92496650339	973.277760989655	1106.28303274042	889.078481432998	741.973224348803	960.593185218621	-0.37344875166311	0.000735582168390621	0.0189004606530828	Tmem131l	3	83804962	83947482	-	11726	protein_coding	transmembrane 131 like [Source:MGI Symbol;Acc:MGI:2443399]	-	795	744	844	729	663	780	784	1167	1055	844	1139	779	4.58694319551679	4.29842183587157	4.17601213429163	3.45840207949745	3.29830220875774	4.1256734764188	4.13827453422911	5.40158373745506	5.62155367333019	5.21242859489724	6.03034914963694
ENSMUSG00000004460	770.68457657006	893.029227007599	941.627590506892	824.311073794774	741.310952645916	900.021850013378	1268.41063137862	1251.17070906213	1080.049656986	951.367479640362	1043.15011164461	899.350248227474	845.164211756437	1082.24980615653	-0.357685953941822	0.00074633721465506	0.0190176632165839	Dnajb11	16	22676595	22698384	+	3236	protein_coding	DnaJ heat shock protein family (Hsp40) member B11 [Source:MGI Symbol;Acc:MGI:1915088]	-	724	831	1017	923	804	921	1297	1470	1101	825	1074	788	15.1368733195326	17.3971656589404	18.2339867608984	15.8668615887642	14.4935356419738	17.6522982856773	24.8075907533065	24.6552249147961	21.2584990390074	18.4626058169666	20.6046096900873
ENSMUSG00000097305	4.25792583740365	4.29857630328568	0	6.2515466051608	1.84405709613412	0.977222421295742	18.581188894521	20.427276882647	9.80971532230699	12.6848997285382	34.9659255299871	2.28261484321694	2.93822137721333	16.4586035335362	-2.49573303721388	0.000752145741893721	1	Gm17276	17	32332385	32360817	+	5435	lncRNA	predicted gene, 17276 [Source:MGI Symbol;Acc:MGI:4936910]	-	4	4	0	7	2	1	19	24	10	11	36	2	0.049792801986315	0.0498593291662265	0	0.0716467239061232	0.0214663029550624	0.011411706457313	0.216375048480897	0.23966898694938	0.114961982191029	0.146568518672073	0.411217488287413
ENSMUSG00000020877	870.745833749046	1019.83722795453	1008.29149071977	806.449512065744	820.605407779683	773.960157666227	1048.37023657508	1137.96954967079	1063.37314093808	1029.78322341678	1082.97241572043	1289.67738641757	883.314938322499	1108.69099212312	-0.328036026495481	0.000758711597426281	0.0192503512371779	Scrn2	11	96920764	96924784	+	2050	protein_coding	secernin 2 [Source:MGI Symbol;Acc:MGI:1343092]	-	818	949	1089	903	890	792	1072	1337	1084	893	1115	1130	26.9963820554657	31.3616092516464	30.8207507884755	24.5037038202154	25.3257871558732	23.9619115510404	32.3663741326115	35.3979158988096	33.0391764174506	31.5460625184731	33.7667785834544
ENSMUSG00000121092	75.5781836139148	89.1954582931778	83.3298752660966	105.383214201282	124.473853989053	171.013923726755	246.445242179963	254.489824496311	117.716583867684	206.417913764394	149.576459211611	149.51127223071	108.162418181713	187.359549291779	-0.792597851504585	0.00076396925513244	0.0193067292006926	ENSMUSG00000121092	8	129231424	129231957	+	534	lncRNA	novel transcript	-	71	83	90	118	135	175	252	299	120	179	154	131	8.9954566453601	10.5298654885443	9.77845963976455	12.2924541045249	14.7475310259393	20.325766487288	29.2087121920369	30.3899564822796	14.0408623192864	24.2750054337601	17.9039183063713
ENSMUSG00000026202	1430.66308136763	1505.57635022581	1368.4617293699	1486.08193585537	1219.84376909272	1466.81085436491	1894.30330993091	2470.84936626351	1484.20992826505	1649.03696470996	2012.48326939259	1571.58031955486	1412.90628671272	1847.07719301948	-0.387283546105128	0.000770981114918378	0.01944392208096	Tuba4a	1	75190872	75196509	-	3701	protein_coding	tubulin, alpha 4A [Source:MGI Symbol;Acc:MGI:1095410]	-	1344	1401	1478	1664	1323	1501	1937	2903	1513	1430	2072	1377	24.5689336058711	25.6451378735366	23.1699205247935	25.0110590778999	20.8529530842868	25.154271688149	32.393931633161	42.5723964315373	25.5431018282647	27.981082644624	34.7567603740792
ENSMUSG00000084934	6.38688875610547	5.3732203791071	9.25887502956629	8.93078086451543	7.37622838453648	2.93166726388722	24.4489327559487	20.427276882647	20.6004021768447	20.7571086466988	28.1669955658229	9.13045937286776	6.709610112953	20.5885292334716	-1.61400275349158	0.000774271285013408	1	Gm16035	5	141358934	141366728	-	679	lncRNA	predicted gene 16035 [Source:MGI Symbol;Acc:MGI:3801892]	-	6	5	10	10	8	3	25	24	21	18	29	8	0.597843620314334	0.498868656145878	0.854475118251394	0.819271921796296	0.687301069577402	0.27403221470764	2.27888998622912	1.91841081600866	1.93242795837602	1.91977482684281	2.65153184488711
ENSMUSG00000071604	44.7082212927383	31.1646781988212	11.1106500354795	25.0061864206432	23.9727422497436	22.4761156898021	78.2365848190359	119.159115148774	62.7821780627647	20.7571086466988	62.1616453866436	43.3696820211219	26.406432314538	64.4110523475065	-1.29626175241461	0.000774625616967435	0.0194958029253976	Fam189a2	19	23950114	24008383	-	2886	protein_coding	family with sequence similarity 189, member A2 [Source:MGI Symbol;Acc:MGI:2685813]	-	42	29	12	28	26	23	80	140	64	18	64	38	0.984598311626483	0.68075001442609	0.241242663323367	0.539708862688537	0.525537642165604	0.494289801003606	1.71572146988172	2.63288479108604	1.38559861002521	0.451672594395796	1.37674107882781
ENSMUSG00000090019	23.4185921057201	33.313966350464	32.406062603482	32.1508111122556	52.5556272398224	49.8383434860828	69.4349690268944	57.8772845008332	44.1437189503814	74.9562256686346	118.495636518289	76.4675972477675	37.2805671496378	73.5625719854668	-0.977327798935066	0.000792165216884471	0.019819542236316	Gimap1	6	48715988	48720729	+	3073	protein_coding	GTPase, IMAP family member 1 [Source:MGI Symbol;Acc:MGI:109368]	-	22	31	35	36	57	51	71	68	45	65	122	67	0.484357739464992	0.683415967667724	0.660807067531545	0.65168509132407	1.0820295027601	1.02933740786537	1.43004239955899	1.20100965664324	0.914963449214807	1.53178692523968	2.46471038036243
ENSMUSG00000027078	1728.71788998588	1658.17580899245	1513.82606733409	1095.80681207604	1333.25328050497	1195.14302124469	2319.71473988441	1844.41287519567	1981.56249510601	1715.92098146044	1694.87611249521	1695.98282851019	1420.82048002302	1875.41167210865	-0.401099782917856	0.000800260241020183	0.01993670645073	Ube2l6	2	84629172	84640679	+	1996	protein_coding	ubiquitin-conjugating enzyme E2L 6 [Source:MGI Symbol;Acc:MGI:1914500]	-	1624	1543	1635	1227	1446	1223	2372	2167	2020	1488	1745	1486	55.0467408772658	52.3710615669407	47.525469421521	34.1965167345648	42.2604933834832	38.0028406213886	73.5541656340839	58.9248548304825	63.2331219379086	53.9870946295448	54.2754606467024
ENSMUSG00000059851	336.376141154888	366.453629855104	329.61595105256	275.961128713527	341.150562784812	330.301178397961	401.940454507797	432.377360682695	408.084157407971	403.610445908032	457.470859017331	407.446749514224	329.976431993142	418.488337839675	-0.344563736220867	0.00080251904969279	0.0199525080330503	Kmt5c	7	4743114	4750513	+	4001	protein_coding	lysine methyltransferase 5C [Source:MGI Symbol;Acc:MGI:2385262]	-	316	341	356	309	370	338	411	508	416	350	471	357	5.34348573477984	5.7739340052667	5.16238799010747	4.2962324714822	5.39460908866317	5.23960187784994	6.3580859741762	6.89120719390465	6.49648695962584	6.33500635395587	7.30837762784738
ENSMUSG00000036073	827.102093915659	920.969972978956	796.263252542701	806.449512065744	749.60920957852	714.349589967187	1118.78316291221	1132.01159391336	965.275987715008	809.527237221254	1218.95101500372	937.013393140554	802.457271841461	1030.26039831768	-0.361796925235025	0.000819755463633962	0.0202988641216781	Galt	4	41755228	41758695	+	2471	protein_coding	galactose-1-phosphate uridyl transferase [Source:MGI Symbol;Acc:MGI:95638]	-	777	857	860	903	813	731	1144	1330	984	702	1255	821	21.2742567608456	23.4960070916434	20.1927236160145	20.3288518136146	19.1930770708015	18.3482551919496	28.6553953531867	29.2131939770158	24.8814762944926	20.5736775352588	31.5311350139038
ENSMUSG00000018449	415.147769146856	440.604071086782	444.426001419182	358.124312667069	414.912846630177	291.212281546131	686.52603178704	606.860350721971	497.352566840964	439.358799688458	537.115467168968	472.501272545907	394.071213749366	539.952414792218	-0.455851236965468	0.000829656325937844	0.0203796779903372	Rpain	11	70861039	70868659	+	2842	protein_coding	RPA interacting protein [Source:MGI Symbol;Acc:MGI:1916973]	-	390	410	480	401	450	298	702	713	507	381	553	414	9.2842463696598	9.77340219454264	9.79910381915885	7.84906895125875	9.23666615980715	6.50342791325045	15.288545292836	13.616503535096	11.1464783679303	9.70841793590992	12.0800764134185
ENSMUSG00000024785	2209.86350961249	2374.96340756534	2117.50471926181	2350.58152354046	2394.50813933015	2557.39107653096	2811.6272669341	3290.49385117972	3171.48096370185	2434.34757517673	2971.13239433973	2512.01763496024	2334.13539597354	2865.18328104873	-0.296221773264507	0.00083299137712698	0.020380079868274	Rcl1	19	29078775	29121329	+	1889	protein_coding	RNA terminal phosphate cyclase-like 1 [Source:MGI Symbol;Acc:MGI:1913275]	-	2076	2210	2287	2632	2597	2617	2875	3866	3233	2111	3059	2201	74.3535167257426	79.2585830308039	70.2430566598411	77.5089354714649	80.1986021673648	85.9254677429396	94.2017599654319	111.078508244533	106.93688727275	80.9289372324231	100.534736227398
ENSMUSG00000026768	42.5792583740365	41.9111189570353	52.7755876685279	30.3646549393525	77.4503980376331	24.4305605323935	71.3908836473703	108.094340170674	75.5348079817638	72.6498802634458	89.3573652433002	90.1632863070691	44.9185964181631	84.5317606022705	-0.912025675122725	0.000841317673199917	0.0204615122024582	Itga8	2	12111443	12306733	-	7368	protein_coding	integrin alpha 8 [Source:MGI Symbol;Acc:MGI:109442]	-	40	39	57	34	84	25	73	127	77	63	92	79	0.367296252437055	0.358592314967399	0.448842976407217	0.256700754432537	0.665053335444095	0.21044593035931	0.61323420166894	0.935522529275669	0.652972512717628	0.619210759499449	0.775187630042347
ENSMUSG00000046668	875.00375958645	951.060007101956	933.294602980282	940.411225033475	976.428232403017	934.224634758729	1374.03002088432	1074.9854459493	1331.17836923706	1051.69350476607	1209.23825791205	971.252615788808	935.070410310651	1168.72970242293	-0.322195639527049	0.000846411488581096	0.0204946487856638	Cxxc5	18	35962450	35994741	+	3008	protein_coding	CXXC finger 5 [Source:MGI Symbol;Acc:MGI:1914643]	-	822	885	1008	1053	1059	956	1405	1263	1357	912	1245	851	18.4884332089429	19.9320251667487	19.4424904965106	19.4736959291678	20.5373750993765	19.7119777637281	28.9102347395299	22.7890208383237	28.1874512115555	21.9565736179956	25.6956816619423
ENSMUSG00000120999	112.835034691197	109.613695733785	116.661825372535	150.930196610311	89.4367691625048	85.0183506527295	207.326949770445	160.864805450845	185.403619591602	128.002169987976	145.691356374946	192.880954251831	110.749312037177	170.028309237941	-0.617899805726406	0.000846560026532994	0.0204946487856638	ENSMUSG00000120999	11	120524511	120525957	+	1447	lncRNA	novel transcript	-	106	102	126	169	97	87	212	189	189	111	150	169	4.95613876163371	4.77548657738096	5.05209151809812	6.4970471525948	3.91047947007399	3.72907279876168	9.06818675156073	7.0891378262269	8.16106928378426	5.55522955249619	6.43563421113249
ENSMUSG00000036398	411.954324768803	408.364748812139	415.723488827526	384.916655260615	435.197474687652	363.526740722016	501.692100152068	532.811472022376	464.980506277351	487.792053197422	514.776125858143	487.338269026817	403.280572179792	498.231754422363	-0.305751317428717	0.000853713176787249	0.0205998138257387	Ppp1r11	17	37259248	37262633	-	1975	protein_coding	protein phosphatase 1, regulatory inhibitor subunit 11 [Source:MGI Symbol;Acc:MGI:1923747]	-	387	380	449	431	472	372	513	626	474	423	530	427	13.2571444422666	13.0347433578491	13.190110570958	12.1397017033805	13.9412496953622	11.6822361263415	16.0769399945971	17.2031263921466	14.9956409569979	15.5103225440594	16.6600919252645
ENSMUSG00000057143	256.54003170357	266.511730803712	312.949975999341	245.596473774174	256.323936362643	201.307818786923	560.369538766345	339.603478174007	276.633972089057	304.437593484916	442.901723379836	348.098763590583	256.53832790506	378.674178247457	-0.562256847523031	0.000870036536959266	0.020952526954772	Trim12c	7	103987961	104002569	-	3740	protein_coding	tripartite motif-containing 12C [Source:MGI Symbol;Acc:MGI:4821183]	-	241	248	338	275	278	206	573	399	282	264	456	305	4.35964938434124	4.49227223239127	5.24341573767197	4.09033555073298	4.33610710212465	3.41621942959149	9.48279027029096	5.79030499870636	4.71119735948463	5.11187100951477	7.5694071172905
ENSMUSG00000089873	59.6109617236511	61.2547123218209	20.3695250650458	44.6539043225772	45.1793988552859	54.7244555925615	166.252742740451	72.3466056260415	80.4396656429173	107.245061341277	93.2424680799655	52.5001413939896	47.6321596468237	95.3377808041071	-1.00473982471493	0.000883708922140445	0.0212401428213874	Mup13	4	61180306	61184285	-	984	protein_coding	major urinary protein 13 [Source:MGI Symbol;Acc:MGI:3702003]	-	56	57	22	50	49	56	170	85	82	93	96	46	3.8503397389621	3.92433203227925	1.29716964597961	2.82665464888051	2.90487727209219	3.52974286315831	10.6931817524564	4.68839262559028	5.20681977673538	6.84440046243467	6.05682127057477
ENSMUSG00000025492	6897.83985659391	6488.70092980973	5961.78963153773	6068.46559743824	6670.87654526518	5883.85619862166	9424.57459876311	7621.92768683766	7513.26096535492	6326.30544643276	8419.98912276272	7383.11771038519	6328.58812654441	7781.52925508939	-0.298319227609565	0.000889360164716133	0.0212871889969234	Ifitm3	7	140589499	140590683	-	678	protein_coding	interferon induced transmembrane protein 3 [Source:MGI Symbol;Acc:MGI:1913391]	-	6480	6038	6439	6795	7235	6021	9637	8955	7659	5486	8669	6469	646.623427210778	603.322334573505	551.008027946855	557.516355330879	622.494686369564	550.793838775046	879.762185212975	716.862798312795	705.823587079934	585.967691850254	793.79422101
ENSMUSG00000059734	1661.65555804677	1732.32625022413	1702.70711793724	1686.13142722051	1547.16390365653	1394.49639518902	1960.80440702709	2048.68564402214	1988.42929583163	2054.95375602318	1760.92286071851	1824.95056715194	1620.74677537903	1939.79108846242	-0.25941433530281	0.000896200422126352	0.0213730749214677	Ndufs8	19	3958863	3962774	-	1291	protein_coding	NADH:ubiquinone oxidoreductase core subunit S8 [Source:MGI Symbol;Acc:MGI:2385079]	-	1561	1612	1839	1888	1678	1427	2005	2407	2027	1782	1813	1599	81.8055528272591	84.5911215874761	82.6465410637699	81.3530037715419	75.8215260685368	68.5563790067953	96.1260862216078	101.192888987097	98.10277633564	99.9606379823397	87.1846815464048
ENSMUSG00000016344	1275.24878830239	1258.40821278688	1231.43037893232	1281.56705405796	1110.12237187274	1051.49132531422	1487.47306887192	1673.3344313035	1480.28604213612	1469.14202310524	1199.52550082039	1629.7869980569	1201.37802187775	1489.92467738234	-0.310684070420111	0.000905635926893324	0.0214730124596599	Ppdpf	2	180829040	180830564	+	1336	protein_coding	pancreatic progenitor cell differentiation and proliferation factor [Source:MGI Symbol;Acc:MGI:1913746]	-	1198	1171	1330	1435	1204	1076	1521	1966	1509	1274	1235	1428	60.6675536671323	59.3794847783672	57.7582967843778	59.7507399761264	52.5710723425	49.9523533418815	70.4653935116168	79.8688078855224	70.5726740397636	69.0574490544355	57.3890615710242
ENSMUSG00000032014	7102.22029678929	6372.63936962102	5604.39705539648	5763.92596995826	6660.73423123644	5230.09439877481	8366.42478908565	8243.25735868484	6947.24039125781	6348.21572778205	8087.81283022784	7481.27014864352	6122.33522029605	7579.03687428029	-0.308110486923337	0.000932195843218075	0.0218862528374044	Oaf	9	43132532	43151208	-	2629	protein_coding	out at first homolog [Source:MGI Symbol;Acc:MGI:94852]	-	6672	5930	6053	6454	7224	5352	8555	9685	7082	5505	8327	6555	171.700505831532	152.809408741856	133.582412622164	136.56399724772	160.292778964427	126.262870610534	201.410706763896	199.944372754482	168.313568621559	151.640182713782	196.637616919277
ENSMUSG00000004768	151.15636722783	183.764136965463	236.10131325394	186.653320068373	144.758482046528	140.720028666587	263.070516454008	333.645522416568	245.242883057675	185.660805117695	261.273165765737	247.663710489038	173.858941371453	256.092767216787	-0.560186954939585	0.000954979550601308	0.0223410644580672	Rab23	1	33758968	33781645	+	8285	protein_coding	RAB23, member RAS oncogene family [Source:MGI Symbol;Acc:MGI:99833]	-	142	171	255	209	157	144	269	392	250	161	269	217	1.15958330684907	1.39826531795876	1.78573439166732	1.40330353281876	1.10543687266385	1.07800337257108	2.00961513518279	2.56799220516694	1.88539038385107	1.4072813270008	2.01571158096467
ENSMUSG00000026158	342.763029910994	344.960748338676	312.949975999341	338.476594765135	358.669105198086	281.440057333174	443.014661537791	406.843264579386	402.198328214587	360.94305591204	463.298513272328	462.22950575143	329.876585257567	423.08788821126	-0.359380065169374	0.00096754624484744	0.0225920208730347	Ogfrl1	1	23405505	23436853	-	8109	protein_coding	opioid growth factor receptor-like 1 [Source:MGI Symbol;Acc:MGI:1917405]	-	322	321	338	379	389	288	453	478	410	313	477	405	2.68654855630134	2.68178353495867	2.41834688110657	2.59997848843237	2.79839559145007	2.20280131748709	3.45767386456656	3.19934255798806	3.15915073394229	2.79527537732027	3.65190694255244
ENSMUSG00000043251	51.0951100488438	73.0757971558565	52.7755876685279	54.4777632735441	38.7251990188165	67.4283470694062	92.9059444726051	104.689794023566	100.059096287531	106.091888638683	89.3573652433002	63.9132156100743	56.2629673724992	92.8362173792933	-0.726685837843231	0.000979983869040684	0.0226897520111552	Exoc3l	8	106016556	106022733	-	3693	protein_coding	exocyst complex component 3-like [Source:MGI Symbol;Acc:MGI:3041195]	-	48	68	57	61	42	69	95	123	102	92	92	56	0.879362725574727	1.24742830173666	0.89549825349807	0.918857940126748	0.663432571832127	1.1588305164065	1.59219928038678	1.80769830445658	1.72573718026648	1.8040812029247	1.54659692882535
ENSMUSG00000002010	1274.18430684304	1285.27431468242	1287.90951661267	1182.43538646184	1218.92174054465	1251.82192167985	1317.30849689052	1713.33784853202	1380.22694584859	1474.90788661821	1545.29965328359	1564.73247502521	1250.09119780408	1499.30221769969	-0.262698095746024	0.000981148604108668	0.0226897520111552	Idh3g	X	72822569	72830503	-	2701	protein_coding	isocitrate dehydrogenase 3 (NAD+), gamma [Source:MGI Symbol;Acc:MGI:1099463]	-	1197	1196	1391	1324	1322	1281	1347	2013	1407	1279	1591	1371	29.9830417362421	29.9980195303642	29.8793909649071	27.2684998373633	28.5518121757368	29.4153950784266	30.8671219100329	40.450075595654	32.5479248835247	34.2920558311365	36.5690955480251
ENSMUSG00000067889	2170.47769561651	2752.16347817865	2308.23754487088	2180.89668711467	2351.172797571	2153.79821653581	2761.75144411197	3110.05290538301	2689.82394137658	2992.48316323241	4137.63452104847	2393.32166311296	2319.45773664792	3014.1779397109	-0.37824569362666	0.000982816159414961	0.0226897520111552	Sptbn2	19	4761195	4802388	+	8896	protein_coding	spectrin beta, non-erythrocytic 2 [Source:MGI Symbol;Acc:MGI:1313261]	-	2039	2561	2493	2442	2550	2204	2824	3654	2742	2595	4260	2097	15.5070281268062	19.5029717777998	16.2591073852821	15.2703408321159	16.7213837247048	15.3662167950172	19.6482123787518	22.2932771734082	19.2586778252811	21.1246805291465	29.7292154653381
ENSMUSG00000112796	170.317033496146	137.554441705142	115.735937869579	100.024745682573	98.6570546431754	87.9500179166168	203.415120529493	262.150053327303	132.431156851144	153.371969445052	205.910450343257	172.337420662879	118.373205218872	188.269361859855	-0.674107716924204	0.000994814244096366	0.0229236558086146	Gm40770	10	117236621	117249836	-	2454	lncRNA	predicted gene, 40770 [Source:MGI Symbol;Acc:MGI:5623655]	-	160	128	125	112	107	90	208	308	135	133	212	151	4.4111471686328	3.53363265223721	2.95532093160502	2.53887494330745	2.5435250920949	2.2746683836979	5.24616447489994	6.81202612696149	3.43726488928741	3.92486428705274	5.3632732766744
ENSMUSG00000097534	32.9989252398783	52.6575597152495	27.7766250886989	53.5846851870926	62.6979412685601	34.202784745351	90.9500298521292	108.945476707451	87.3064663685322	61.1181532375021	83.5297109883024	54.7827562372066	43.9864202074717	81.1054322318539	-0.885582458048569	0.00100733236881915	0.0231253386053024	Gm16675	8	47121843	47192550	-	5627	lncRNA	predicted gene, 16675 [Source:MGI Symbol;Acc:MGI:4439599]	-	31	49	30	60	68	35	93	128	89	53	86	48	0.372727041170441	0.589936344717594	0.309323940977091	0.593160442402366	0.704950794929088	0.385781386323504	1.02296119396062	1.23461969700362	0.988250137116293	0.682097591904036	0.948833827974349
ENSMUSG00000042305	2098.09295638065	2147.1388634912	2238.79598214913	2345.22305502175	2200.88214423607	2488.98550704025	2807.71543769315	3104.09494962557	2689.82394137658	2375.53576734442	2651.58268602402	2549.68077987332	2253.18641805318	2696.40559365618	-0.259409986939896	0.00102432603998537	0.0234278816072632	Tmem183a	1	134273835	134289717	-	3564	protein_coding	transmembrane protein 183A [Source:MGI Symbol;Acc:MGI:1914729]	-	1971	1998	2418	2626	2387	2547	2871	3647	2742	2060	2730	2234	37.4158014243947	37.9790219647057	39.3629642984776	40.9878248385683	39.0698308235892	44.324249395266	49.8595807987084	55.5390203308883	48.0710431912741	41.8578663377309	47.5547141424968
ENSMUSG00000041355	1022.96668243623	1031.65831278856	900.8885403768	914.51196052638	889.757548884713	877.545734323576	1161.81328456268	1176.27069382576	1084.95451464715	1102.43310368023	1031.49480313462	1194.94887042407	939.554796556043	1125.31921171242	-0.260938746100399	0.00105293670774851	0.0239484604529021	Ssr2	3	88483183	88495726	+	1864	protein_coding	signal sequence receptor, beta [Source:MGI Symbol;Acc:MGI:1913506]	-	961	960	973	1024	965	898	1188	1382	1106	956	1062	1047	34.8805723608628	34.8908309894988	30.2855961882937	30.5598975395535	30.2000882728373	29.8799983298044	39.4478790809376	40.2403993362075	37.0734506849957	37.1415091410203	35.3709913845717
ENSMUSG00000034551	0	0	0	0	0.92202854806706	0	3.91182924095179	22.1295499562009	1.9619430644614	5.76586351297189	3.88510283666523	0	0.153671424677843	6.27571476854187	-4.65950579314614	0.00105911392340913	1	Hdx	X	110479628	110606776	-	9534	protein_coding	highly divergent homeobox [Source:MGI Symbol;Acc:MGI:2685226]	Homeobox	0	0	0	0	1	0	4	26	2	5	4	0	0	0	0	0	0.00611859432351395	0	0.025967968125019	0.148012484030037	0.013107161174916	0.0379789032068348	0.0260467455520837
ENSMUSG00000023348	294.861364240203	289.079256395962	310.172313490471	229.521068218047	255.401907814576	308.802285129454	421.499600712556	423.865995314925	338.435178619591	305.59076618751	393.366662212354	359.511837806668	281.306365881452	373.711673475601	-0.412195965155468	0.00106617018482297	0.0241914432601589	Trip6	5	137307916	137312666	-	2429	protein_coding	thyroid hormone receptor interactor 6 [Source:MGI Symbol;Acc:MGI:1343458]	-	277	269	335	257	277	316	431	498	345	265	405	315	7.7153987676397	7.50258204312069	8.00177780045506	5.88577225892215	6.65241082077638	8.06881406841363	10.9825422079863	11.1276120170647	8.87453020818627	7.90070635990945	10.3513294769343
ENSMUSG00000084106	631.237505395091	612.547123218209	471.276739004924	601.93463026834	522.790186754023	585.356230356149	612.201276208956	932.845644307547	784.777225784559	702.282175879977	688.634477798912	722.447597878162	570.857069166123	740.531399643019	-0.376763589718115	0.00107903866490404	0.0242724411764677	Gm6136	1	86836515	86837405	-	891	processed_pseudogene	predicted pseudogene 6136 [Source:MGI Symbol;Acc:MGI:3646897]	-	593	570	509	674	567	599	626	1096	800	609	709	633	45.0280471733457	43.3394244642287	33.1443322215469	42.08041727524	37.1220679966067	41.6964670400697	43.4860293695458	66.7625624158526	56.1004151028727	49.4979429119963	49.4011609187256
ENSMUSG00000045128	4498.49864721695	4360.90565968332	3866.50621234688	3925.97126804098	3593.14525181733	3977.29525467367	4529.89826102218	4673.59072344228	4834.22771083288	4647.28599145535	4649.49681977911	5008.05696601797	4037.05371562986	4723.75941209163	-0.226812244593914	0.00109685666299281	0.0245505156029432	Rpl18a	8	71347366	71350056	-	1739	protein_coding	ribosomal protein L18A [Source:MGI Symbol;Acc:MGI:1924058]	-	4226	4058	4176	4396	3897	4070	4632	5491	4928	4030	4787	4388	164.412954541446	158.087833871023	139.32533730318	140.622866648592	130.724693075704	145.159334159671	164.86258089957	171.376791831697	177.061813868328	167.823597307771	170.896224886702
ENSMUSG00000030603	1045.3207930826	1263.78143316599	1204.57964134657	1076.15909417411	974.584175306882	960.609640133714	1361.31657585122	1430.76051832207	1402.7892910899	1202.75912880594	1366.58492279699	1244.02508955323	1087.50579620164	1334.70592106989	-0.296318493036172	0.00109712242242402	0.0245505156029432	Psmc4	7	27741132	27749526	-	2163	protein_coding	proteasome (prosome, macropain) 26S subunit, ATPase, 4 [Source:MGI Symbol;Acc:MGI:1346093]	-	982	1176	1301	1205	1057	983	1392	1681	1430	1043	1407	1090	30.7157476857722	36.8329743326036	34.8971509702172	30.9904849770745	28.5065903570799	28.1868885702138	39.8323419418253	42.1804628406047	41.3079183397037	34.9200897171007	40.3837088113323
ENSMUSG00000074457	551.401395943773	511.530580090996	465.721413987184	425.105169150935	409.380675341775	488.611210647871	681.63624523585	588.135346912878	586.620976273958	528.153097788225	626.472832412268	593.479859236404	475.291740860422	600.749726309931	-0.339722180504266	0.00112351214555077	0.0249992902976882	S100a16	3	90444561	90450458	+	1617	protein_coding	S100 calcium binding protein A16 [Source:MGI Symbol;Acc:MGI:1915110]	-	518	476	503	476	444	500	697	691	598	458	645	520	21.6733409425065	19.9426524602316	18.0479201275341	16.3755078671769	16.0176853163201	19.1783007407223	26.6793892777428	23.1936006068926	23.1070740370149	20.5117644197496	24.7638587662879
ENSMUSG00000022841	2564.33583557635	2705.95378291833	2717.47982117771	2503.29787632368	2381.59973965722	2614.06997696611	3134.35317931263	2925.35627690241	2907.59962153179	3084.73697943996	3278.05551843629	2735.7138895955	2581.1228387699	3010.9692442031	-0.222434053177262	0.00112559128451078	0.0249992902976882	Ap2m1	16	20354228	20363659	+	4120	protein_coding	adaptor-related protein complex 2, mu 1 subunit [Source:MGI Symbol;Acc:MGI:1298405]	-	2409	2518	2935	2803	2583	2675	3205	3437	2964	2675	3375	2397	39.5590366516173	41.4042095399535	41.331397003254	37.8463260831024	36.5724451452007	40.2695438817844	48.1486310056493	45.2775024754064	44.9505256842048	47.0190805335122	50.8563497157636
ENSMUSG00000028713	184.155292467708	212.779527012641	144.438450461234	208.08719414321	168.731224296272	261.895608907259	482.132953947309	384.713714623185	197.17527797837	206.417913764394	341.88904962654	278.479010872467	196.681216214721	315.134653468711	-0.681805140192306	0.00113178159030577	0.0250460207065504	Cyp4b1	4	115481922	115504920	-	2256	protein_coding	cytochrome P450, family 4, subfamily b, polypeptide 1 [Source:MGI Symbol;Acc:MGI:103225]	-	173	198	156	233	183	268	493	452	201	179	352	244	5.18815725084692	5.94582445652164	4.01194248340695	5.74532592782033	4.73193533923312	7.36793590052877	13.5257373443305	10.8742543350988	5.56686582512665	5.74594543511874	9.68661841499724
ENSMUSG00000024953	3128.51100903233	3177.72253220394	2868.39948415964	2699.77505534302	2852.75632771948	2499.73495367451	3171.51555710167	3590.94504866199	3395.14247305045	3318.83103806662	3379.06819218958	3493.54201754353	2871.14989368882	3391.50738776897	-0.240605202305053	0.00113809751225687	0.0250953566347196	Prdx5	19	6884065	6887474	-	2139	protein_coding	peroxiredoxin 5 [Source:MGI Symbol;Acc:MGI:1859821]	-	2939	2957	3098	3023	3094	2558	3243	4219	3461	2878	3479	3061	92.9597451823671	93.6540424886079	84.0310565309385	78.6185822487961	84.3793803644236	74.1719839716123	93.8402788781031	107.053011201317	101.098475440567	97.4378218059529	100.974629407844
ENSMUSG00000025268	69.1912948578093	116.061560188713	96.2923003074894	67.8739345703173	110.643425768047	100.653909393461	138.869938053789	191.505720774816	144.202815237913	101.479197828305	156.375389175775	146.087349965884	93.4527375143063	146.42006850608	-0.65108805134973	0.00114541310331614	0.0252114045428832	Maged2	X	149589366	149597341	-	3239	protein_coding	MAGE family member D2 [Source:MGI Symbol;Acc:MGI:1933391]	-	65	108	104	76	120	103	142	225	147	88	161	128	1.35771473616204	2.25890931105215	1.86290876660823	1.30527039988812	2.16121068034759	1.97231563239768	2.71350434939474	3.77026361551564	2.83569931650547	1.96752059026297	3.08591210304601
ENSMUSG00000021611	398.116065797241	411.588681039604	351.837251123519	340.262750938038	325.476077467672	209.125598157289	504.625972082782	434.930770293026	409.065128940201	565.054624271245	538.086742878134	412.011979200658	339.401070753894	477.295869611008	-0.492341347836814	0.00117055561566633	0.0255359930224048	Tert	13	73775030	73797962	+	5730	protein_coding	telomerase reverse transcriptase [Source:MGI Symbol;Acc:MGI:1202709]	-	374	383	380	381	353	214	516	511	417	490	554	361	4.41593938348877	4.52824733372875	3.84767312410515	3.69886259854765	3.59374196037956	2.31637725365378	5.57375924003616	4.84023474708922	4.54710753277204	6.19282802636098	6.00238387172057
ENSMUSG00000040472	1006.99946054596	1124.0777033092	1127.73097860117	879.68191515477	1021.6076312583	901.97629485597	1233.20416821005	1272.44912248155	1228.17635835283	1248.88603690971	1152.90426678041	1194.94887042407	1010.34566395423	1221.76147052644	-0.274544308475785	0.00119003321139522	0.0256635614856984	Rabggta	14	55952873	55959720	-	3768	protein_coding	Rab geranylgeranyl transferase, a subunit [Source:MGI Symbol;Acc:MGI:1860443]	-	946	1046	1218	985	1108	923	1261	1495	1252	1083	1187	1047	16.9858140486106	18.8064480429465	18.7545042793658	14.5419678974573	17.1536155877557	15.1929093688012	20.7136826445766	21.5342844500229	20.7609501925882	20.8144588544269	19.5572797754155
ENSMUSG00000027796	23.4185921057201	12.895728909857	5.55532501773977	11.6100151238701	8.29825693260354	85.0183506527295	142.781767294741	125.117070906213	57.8773204016112	108.398234043872	121.409463645788	46.7936042859473	24.46604479042	100.396243429695	-2.03851579499099	0.00119043796029087	0.0256635614856984	Smad9	3	54663003	54708678	+	5368	protein_coding	SMAD family member 9 [Source:MGI Symbol;Acc:MGI:1859993]	MH1	22	12	6	13	9	87	146	147	59	94	125	41	0.277278564339777	0.151444925867236	0.0648496950774251	0.134718950329656	0.0978040433165869	1.00521019743073	1.68342384422383	1.4862948551468	0.686741505575381	1.26812746417111	1.44565988318255
ENSMUSG00000035960	30.8699623211765	68.7772208525708	56.4791376803544	43.7608262361256	68.2301125569624	50.8155659073786	84.1043286804636	127.670480516544	128.507270722222	71.4967075608515	95.1850194982981	62.7719081884659	53.1554709257614	94.9559525278074	-0.840335970503883	0.00119215589097068	0.0256635614856984	Apex1	14	51162425	51164596	+	1422	protein_coding	apurinic/apyrimidinic endonuclease 1 [Source:MGI Symbol;Acc:MGI:88042]	-	29	64	61	49	74	52	86	150	131	62	98	55	1.37976309512536	3.04906277376586	2.48885407333717	1.91687736357838	3.03570055748824	2.26805659561589	3.74327712674721	5.72521511985708	5.75606236921801	3.15747306846494	4.27853513803963
ENSMUSG00000028037	98.9967757196348	98.8672549755706	89.811087786793	116.100151238701	136.460225113925	187.626704888782	232.753839836632	225.551182245894	212.870822494062	130.308515393165	256.416787219905	133.532968328191	121.310366620568	198.572352586308	-0.71263418597112	0.00123489990153921	0.0263774618968776	Ifi44	3	151436559	151455597	-	6129	protein_coding	interferon-induced protein 44 [Source:MGI Symbol;Acc:MGI:2443016]	-	93	92	97	130	148	192	238	265	217	113	264	117	1.02659572230351	1.01691392436354	0.918229641269238	1.1799173199047	1.40863638203566	1.94295055022601	2.4034797164601	2.34669365705742	2.21219753607749	1.33516944162695	2.67413254334726
ENSMUSG00000055782	1326.34389835124	1527.06923174224	1364.75817935807	1243.16469634055	1235.51825440986	1352.47583107331	1736.8521829826	1363.52073191669	2145.38474098854	1534.87286715312	1792.974959121	1589.8412383006	1341.55501521254	1693.90778674376	-0.336710212072564	0.00125026886703808	0.026587270139808	Abcd2	15	91030074	91076002	-	5946	protein_coding	ATP-binding cassette, sub-family D (ALD), member 2 [Source:MGI Symbol;Acc:MGI:1349467]	-	1246	1421	1474	1392	1340	1384	1776	1602	2187	1331	1846	1393	14.1774870912944	16.1903098789188	14.3827447729807	13.0230340359967	13.1463957106815	14.4364803969335	18.4872018160353	14.6230428887764	22.9814628692639	16.2106605746567	19.274158034171
ENSMUSG00002076026	12.7737775122109	24.7168137438926	15.7400875502627	15.1823274696762	25.8167993458777	12.7038914768446	28.3607619969005	34.8965980078553	15.6955445156912	41.5142172933976	104.897776589961	51.3588339723812	17.8222828497941	46.1206220626978	-1.37157263895585	0.00125771079231627	0.026587270139808	U6	17	87010726	87010835	-	110	snRNA	U6 spliceosomal RNA [Source:RFAM;Acc:RF00026]	-	12	23	17	17	28	13	29	41	16	36	108	45	7.3806512398806	14.1651487327821	8.96655117270532	8.59714163026787	14.8488271986427	7.32994654310407	16.3176809886682	20.2297873889641	9.08826724666538	23.7004928622958	60.9536467866025
ENSMUSG00000062960	571.62654367144	459.947664451567	474.980289016751	600.148474095437	449.949931456725	811.094609675466	1039.56862078294	1187.33546880386	542.477257323576	682.678239935872	757.595053149719	787.502120909844	561.291252061231	832.859460150968	-0.569907897281132	0.00127800267631734	0.0269241278572155	Kdr	5	76093487	76139118	-	9030	protein_coding	kinase insert domain protein receptor [Source:MGI Symbol;Acc:MGI:96683]	-	537	428	513	672	488	830	1063	1395	553	592	780	690	4.02339487578209	3.21101257807012	3.29608808986881	4.13980007367208	3.15252746410038	5.7008613969282	7.28615892620375	8.38468215659601	3.82640709174042	4.74768086376492	5.36260089238597
ENSMUSG00000050493	61.7399246423529	76.2997293833208	68.5156752187905	64.3016222245111	54.3996843359565	74.2689040184764	131.046279571885	195.7614034587	105.944925480915	109.551406746466	78.6733324424709	69.6197527181167	66.587589970568	115.099516736426	-0.794260090307352	0.00131359409942533	0.0275316770121876	Fam167b	4	129470608	129472342	-	959	protein_coding	family with sequence similarity 167, member B [Source:MGI Symbol;Acc:MGI:2668032]	-	58	71	74	72	59	76	134	230	108	95	81	61	4.09181047188375	5.01563275164476	4.47695065606461	4.17649277505499	3.58889053028419	4.91524449349081	8.64847066890689	13.016954168234	7.03653642403446	7.17385443201804	5.24366617298718
ENSMUSG00000026630	26.6120364837728	24.7168137438926	15.7400875502627	19.647717901934	18.4405709613412	15.6355587407319	25.4268900661867	87.6670632880267	45.1246904826121	48.4332535089639	51.4776125858143	19.402226167344	20.1321308969892	46.2552893498246	-1.20929579882014	0.0013273607984339	0.0277255872897367	Batf3	1	190830044	190841142	+	1597	protein_coding	basic leucine zipper transcription factor, ATF-like 3 [Source:MGI Symbol;Acc:MGI:1925491]	TF_bZIP	25	23	17	22	20	16	26	103	46	42	53	17	1.05911035846753	0.975683381719496	0.617608408890159	0.766329616017099	0.730553265878297	0.621391354745106	1.00767749071732	3.50051913064073	1.79972731168311	1.90454805927445	2.06034324060097
ENSMUSG00000057058	0	2.14928815164284	2.77766250886989	0	0	1.95444484259148	8.80161579214154	25.5340961033088	9.80971532230699	2.30634540518876	7.77020567333046	4.56522968643388	1.14689925051737	9.7978679971184	-3.11339086497152	0.00134738522629996	1	Skap1	11	96355419	96649956	+	7462	protein_coding	src family associated phosphoprotein 1 [Source:MGI Symbol;Acc:MGI:1925723]	-	0	2	3	0	0	2	9	30	10	2	8	4	0	0.0181576959272608	0.0233257278997332	0	0	0.016623592762127	0.07465181831062	0.218205733059147	0.083733365479529	0.0194098559728739	0.0665584755008217
ENSMUSG00000024963	256.54003170357	256.839934121319	247.21196328942	206.301037970307	163.19905300787	212.057265421176	308.056552724954	278.321647526065	322.7396341039	275.608275920056	380.740077993192	278.479010872467	223.69154758561	307.324199856772	-0.46037991908213	0.00134751292317495	0.0280036442003971	Dnajc4	19	6965279	6969940	-	1240	protein_coding	DnaJ heat shock protein family (Hsp40) member C4 [Source:MGI Symbol;Acc:MGI:1927346]	-	241	239	267	231	177	217	315	327	329	239	392	244	13.1492650785776	13.0575652238725	12.492770775254	10.3630630372441	8.32680488357066	10.8539593042118	15.7232382162779	14.312853115284	16.5778423214123	13.958018757835	19.6260547299753
ENSMUSG00000103857	7.45137021545639	2.14928815164284	12.9624250413928	16.9684836425793	15.67448531714	6.84055694907019	14.6693596535692	30.6409153239705	41.2008043536893	35.7483537804257	26.2244441474903	25.1087632753863	10.3411015528803	28.9321067557552	-1.47037363518527	0.00135983783149795	1	Gm37249	9	99189636	99192504	+	2869	TEC	predicted gene, 37249 [Source:MGI Symbol;Acc:MGI:5610477]	-	7	2	14	19	17	7	15	36	42	31	27	22	0.165072076644245	0.0472264646250333	0.283117479055342	0.368401082715023	0.345656859800103	0.151327421459906	0.32360396667471	0.681039183027126	0.914687057328208	0.782489840250461	0.584254195410097
ENSMUSG00000029352	14.9027404309128	2.14928815164284	12.0365375384362	16.0754055561278	8.29825693260354	0.977222421295742	74.3247555780841	13.6181845884313	24.5242883057675	21.9102813492932	29.1382712749892	26.2500706969948	9.07324183850314	31.6276419655934	-1.79648475321452	0.00136377629551722	1	Crybb3	5	113223705	113229450	-	2333	protein_coding	crystallin, beta B3 [Source:MGI Symbol;Acc:MGI:102717]	-	14	2	13	18	9	1	76	16	25	19	30	23	0.405993817310192	0.0580766082336993	0.32329412210909	0.429195946343521	0.225037335843737	0.0265849226727372	2.01628527817175	0.372224873287579	0.669543906138282	0.589775087895868	0.798316562666842
ENSMUSG00000040188	349.149918667099	458.873020375746	424.982363857093	429.570559583192	410.302703889842	446.590646532154	662.077099031091	568.559206567008	567.982517161575	517.774543464876	491.465508838151	443.968587005695	419.911535484188	541.971243678066	-0.36892345994774	0.00137329770991158	0.0284432419445768	Scamp2	9	57468226	57496078	+	3238	protein_coding	secretory carrier membrane protein 2 [Source:MGI Symbol;Acc:MGI:1346518]	-	328	427	459	481	445	457	677	668	579	449	506	389	6.85335332342218	8.93381631144798	8.22441537459382	8.26353892485326	8.01696474205374	8.75365640523213	12.9409139659019	11.1969506722087	11.1726324301289	10.0419269651087	9.70157613336506
ENSMUSG00000020708	1012.32186784272	1126.22699146085	1066.62240340604	1037.75673645669	1024.3737169025	1132.60078628176	1184.30630269816	1286.91844360676	1290.9585364156	1186.61471096962	1237.40525347788	1289.67738641757	1066.65041705843	1245.9801055976	-0.224549230988807	0.00138435045529252	0.028623892747311	Psmc5	11	106146980	106153946	+	1394	protein_coding	protease (prosome, macropain) 26S subunit, ATPase 5 [Source:MGI Symbol;Acc:MGI:105047]	-	951	1048	1152	1162	1111	1159	1211	1512	1316	1029	1274	1130	46.1555431733566	50.9312689762062	47.9467197487221	46.3704381458705	46.4919853439774	51.5668736773169	53.7693139192721	58.8693396530865	58.9857230374498	53.4564559836454	56.7381639611195
ENSMUSG00000002102	2009.74099525452	2002.0619132553	1774.0004556649	1661.12524079987	1622.77024459803	1633.91588840648	2222.89696617086	2143.16179960438	2184.62360227777	2149.51391763592	1992.0864795001	2057.77728116007	1783.93578966318	2125.01000772485	-0.252957902422376	0.00138998420642017	0.0286811413240276	Psmc3	2	90884354	90896714	+	2607	protein_coding	proteasome (prosome, macropain) 26S subunit, ATPase 3 [Source:MGI Symbol;Acc:MGI:1098754]	-	1888	1863	1916	1860	1760	1672	2273	2518	2227	1864	2051	1803	48.9967283435112	48.4125336436858	42.6406355098123	39.6889635946841	39.3820612863339	39.7782233692632	53.964919085178	52.4221515338186	53.374396514567	51.7788545420995	48.8419790433355
ENSMUSG00000047150	193.735625601866	139.703729856785	144.438450461234	154.502508956117	156.7448531714	128.016137189742	221.018352113776	179.589809259938	248.185797654367	206.417913764394	214.651931725754	197.446183938265	152.856884206191	211.218331409416	-0.4670989570352	0.00139178962946755	0.0286811413240276	1700001C19Rik	17	47723659	47748301	-	1896	protein_coding	RIKEN cDNA 1700001C19 gene [Source:MGI Symbol;Acc:MGI:1922712]	-	182	130	156	173	170	131	226	211	253	179	221	173	6.49440215464177	4.64505656940893	4.77370371443358	5.07581301886316	5.23043001459122	4.28531847152424	7.37773805794944	6.04010195144922	8.33750255388639	6.8369477329261	7.23639999112315
ENSMUSG00000037921	104.319183016389	127.882645022749	146.290225467147	107.169370374185	160.432967363668	102.608354236053	244.489327559487	201.719359216139	150.088644431297	155.678314850241	199.111520379093	163.206961290011	124.783790913365	185.715687954378	-0.574380127606019	0.00140374848339756	0.0287827026261916	Ddx60	8	62381121	62491278	+	8684	protein_coding	DExD/H box helicase 60 [Source:MGI Symbol;Acc:MGI:2384570]	-	98	119	158	120	174	105	250	237	153	135	205	143	0.763505876381016	0.928352977550508	1.05561722289551	0.768704239842955	1.16884316222783	0.749928095638769	1.78185893672222	1.48125107354791	1.10084305735677	1.12580070309731	1.4655568510819
ENSMUSG00000021364	11685.8774607543	11338.5696439918	11494.8933492065	10358.8127247515	12459.3717700302	12083.3552393218	13706.0717029849	14584.2245576732	21110.5073736046	13632.8076900707	13645.4524380774	12015.684534694	11570.1466980094	14782.4580495175	-0.353521029764935	0.00141505164448534	0.0289179106448735	Elovl2	13	41335857	41373881	-	3966	protein_coding	elongation of very long chain fatty acids (FEN1/Elo2, SUR4/Elo3, yeast)-like 2 [Source:MGI Symbol;Acc:MGI:1858960]	-	10978	10551	12415	11599	13513	12365	14015	17135	21520	11822	14049	10528	187.273634733884	180.229924694186	181.619806724882	162.691807342447	198.758574786385	193.371092567652	218.72252852853	234.493897888694	339.034074418594	215.866776825143	219.918278066219
ENSMUSG00000030630	15654.2643412145	16184.1397818706	16305.8048145692	16061.1163067446	14480.4583473932	15033.5897292137	16821.843693403	16987.8341375313	17649.6398078947	19184.1810803601	17942.3761754292	18194.7229152822	15619.8955535009	17796.7663016501	-0.188177955745818	0.00143315524131914	0.029142405089208	Fah	7	84234367	84255930	-	2218	protein_coding	fumarylacetoacetate hydrolase [Source:MGI Symbol;Acc:MGI:95482]	-	14706	15060	17611	17984	15705	15384	17201	19959	17992	16636	18473	15942	448.579211177685	459.991088538967	460.671845257425	451.047829487644	413.050551124166	430.187581955415	480.00446776327	488.401943242613	506.840945480737	543.168944974035	517.064250742159
ENSMUSG00000079334	1665.91348388418	1484.08346870938	1544.38035493166	1571.81743215472	1387.65296484093	1532.28475659172	1913.86245613567	1961.86971727089	1752.99612809626	1925.79841333261	1531.70179335527	1911.68993119419	1531.0220768521	1832.98640656415	-0.259711311006308	0.00143774827126246	0.0291874781283398	Naa80	9	107456086	107461249	+	3154	protein_coding	N(alpha)-acetyltransferase 80, NatH catalytic subunit [Source:MGI Symbol;Acc:MGI:1888902]	-	1565	1381	1668	1760	1505	1568	1957	2305	1787	1670	1577	1675	33.5705746920695	29.6631984780808	30.6834049977241	31.0419377749983	27.8356660786224	30.8343295389149	38.4045130040737	39.6651761794689	35.4010917223568	38.3444350983208	31.0412090116957
ENSMUSG00000000673	11069.5426957901	9902.84515869438	9175.54515430019	9805.99738923795	9278.37327919883	9321.72467674008	10852.3922717105	11812.9239939274	11018.2722500152	10729.1188249381	11229.8897493808	12186.8806479352	9759.00472566026	11304.9129563179	-0.212221626272239	0.00145151669864068	0.0293755970727396	Haao	17	84138585	84155392	-	4681	protein_coding	3-hydroxyanthranilate 3,4-dioxygenase [Source:MGI Symbol;Acc:MGI:1349444]	-	10399	9215	9910	10980	10063	9539	11097	13879	11232	9304	11562	10678	150.30002753662	133.36525094958	122.82993117818	130.485286716482	125.405226988995	126.390475542926	146.730389560421	160.923578497703	149.924374447234	143.939046826343	153.342644132974
ENSMUSG00000060512	580.142395346247	594.278173929245	437.018901395529	542.098398476087	461.936302581597	532.586219606179	606.333532347528	823.900167600096	582.697090145035	633.091813724314	707.088716273071	698.480142024384	524.676731889147	675.265243685738	-0.36549737882284	0.00145419011726312	0.0293755970727396	0610040J01Rik	5	63969706	64056968	+	2403	protein_coding	RIKEN cDNA 0610040J01 gene [Source:MGI Symbol;Acc:MGI:1923511]	-	545	553	472	607	501	545	620	968	594	549	728	612	15.3443626657942	15.5904032534538	11.3961307406639	14.0518260667544	12.1621613892931	14.0667209340596	15.9694899109902	21.8636030284999	15.444948551215	16.5449757704957	18.8081566046729
ENSMUSG00000026259	1508.37022790024	1699.01228387366	1421.23731703843	1426.24570406311	1439.28656353268	1330.9769378048	1554.95212327834	1983.14813069031	1643.12731648642	1646.73061930477	2089.21405041673	1953.9183057937	1470.85483903549	1811.84842432838	-0.301264400741376	0.00146522347410693	0.0295498763694274	Ngef	1	87404556	87501592	-	3905	protein_coding	neuronal guanine nucleotide exchange factor [Source:MGI Symbol;Acc:MGI:1858414]	-	1417	1581	1535	1597	1561	1362	1590	2330	1675	1428	2151	1712	24.5501943824198	27.4281691935439	22.8063894782148	22.7500168741305	23.3189328542065	21.6324749549463	25.2016636930379	32.384338451588	26.8007880953601	26.4822408508281	34.1969990187746
ENSMUSG00000072893	111.770553231846	83.8222379140707	103.699400331142	109.84860463354	113.409511412248	130.947804453629	177.988230463307	132.777299737206	152.050587495758	151.065624039864	165.116870558272	149.51127223071	108.916351996079	154.751647420853	-0.505170096716337	0.0014909258099628	0.0300189357343657	4933439C10Rik	11	59396488	59404473	+	5616	lncRNA	RIKEN cDNA 4933439C10 gene [Source:MGI Symbol;Acc:MGI:1921726]	-	105	78	112	123	123	134	182	156	155	131	170	131	1.26493533090902	0.940921715341809	1.15707129260652	1.21836063199183	1.27762917173914	1.47988456121732	2.00584520454574	1.50763998156236	1.7244809089615	1.6892415625281	1.8792754743548
ENSMUSG00000032609	413.018806228154	416.961901418711	386.095088732914	325.973501554813	318.099849083136	345.936737138693	469.419508914215	439.186452976911	435.55136031043	508.549161844121	456.499583308164	481.631731918774	367.680980692737	465.139633212103	-0.339773535946002	0.00149611346583498	0.0300740844310724	Klhdc8b	9	108324835	108338780	-	8419	protein_coding	kelch domain containing 8B [Source:MGI Symbol;Acc:MGI:1925517]	-	388	388	417	365	345	354	480	516	444	441	470	422	3.11800881852659	3.122174728565	2.87372191955166	2.41173841000576	2.3904815306725	2.60791175992464	3.52885532396624	3.32651387308498	3.29515806751943	3.79337381303522	3.46581974949447
ENSMUSG00000025347	15601.040268247	15797.2679145749	14701.2417719454	13039.833140279	13888.5160195341	12523.1053289049	15838.9965966138	17389.57058289	17671.2211816038	16821.3302127442	16140.6597349257	16445.0986379564	14258.5007405809	16717.8128244557	-0.229633366292827	0.00150284571088911	0.0301299234063541	Mettl7b	10	128794143	128796857	-	1230	protein_coding	methyltransferase like 7B [Source:MGI Symbol;Acc:MGI:1918914]	-	14656	14700	15878	14601	15063	12815	16196	20431	18014	14587	16618	14409	806.151131631837	809.651661396561	748.962168685971	660.35175245287	714.386389379996	646.195068448196	814.996572530747	901.5392916088	915.079526420596	858.832426198147	838.76879895343
ENSMUSG00000117438	141.576034093671	126.808000946927	70.3674502247038	64.3016222245111	86.6706835183036	51.7927883286743	178.966187773545	200.017086142585	128.507270722222	130.308515393165	116.553085099957	170.054805819662	90.2527632227986	154.067825158523	-0.776187092001607	0.00155568135996019	0.0310084959934276	Rpsa-ps7	17	82717364	82718248	-	885	processed_pseudogene	ribosomal protein SA, pseudogene 7 [Source:MGI Symbol;Acc:MGI:3643805]	-	133	118	76	72	94	53	183	235	131	113	120	149	10.167507310683	9.03284846728136	4.98241062172259	4.52571363986185	6.19599972695583	3.71434926956077	12.7985551646948	14.4120160949351	9.24872394240453	9.24661413303002	8.41795498622256
ENSMUSG00000033105	717.460503602515	896.253159235064	621.270514483898	590.32461514447	603.006670435857	539.426776555249	896.786853488199	934.547917381101	1337.06419843044	659.614785883984	1434.57422243864	642.556078365569	661.290373242842	984.190675997988	-0.574669218101586	0.00155727662609784	0.0310084959934276	Lss	10	76367422	76392972	+	10787	protein_coding	lanosterol synthase [Source:MGI Symbol;Acc:MGI:1336155]	-	674	834	671	661	654	552	917	1098	1363	572	1477	563	4.22732210782074	5.23782953210762	3.60903452444053	3.40877727513388	3.53674604573745	3.17386565094222	5.26164790097583	5.52461232884001	7.89494245557465	3.84010334171701	8.50057767873821
ENSMUSG00000000154	2841.10101500758	2571.62327344066	2467.49019537942	2726.56739793656	2546.64284976122	2229.04434297559	2918.22461375004	3166.22791681029	3155.78541918616	2813.74139433028	2925.48243600892	3090.66049771574	2563.74484575017	3011.68704630024	-0.232536798772154	0.0015601494288527	0.0310084959934276	Slc22a18	7	143027473	143053071	+	1699	protein_coding	solute carrier family 22 (organic cation transporter), member 18 [Source:MGI Symbol;Acc:MGI:1336884]	-	2669	2393	2665	3053	2762	2281	2984	3720	3217	2440	3012	2708	106.282391481094	95.4190982145569	91.0066293764001	99.961156171203	94.8324787583373	83.2687502662309	108.707264064469	118.836460465469	118.307281142491	104.002555167095	110.060178391086
ENSMUSG00000052776	39.3858139959838	90.2701023689992	46.2943751478315	109.84860463354	118.019654152584	86.972795495321	248.401156800439	344.710297394668	124.583384593299	74.9562256686346	150.547734920778	89.0219788854607	81.7985576323765	172.036796377213	-1.07402929877432	0.00156569679316144	0.0310660549492873	Oas1a	5	121034319	121045584	-	1885	protein_coding	2'-5' oligoadenylate synthetase 1A [Source:MGI Symbol;Acc:MGI:2180860]	-	37	84	50	123	128	89	254	405	127	65	155	78	1.32799516119868	3.01893609251313	1.53896181775251	3.62987443462394	3.96118770285883	2.92838917188283	8.34018122790433	11.6612153481057	4.20965163912186	2.49717836671699	5.10492031492078
ENSMUSG00000074466	113.899516150548	117.136204264535	118.513600378449	112.527838892894	89.4367691625048	86.972795495321	224.930181354728	207.677314973578	115.754640803222	163.750523768402	160.260492012441	114.130742160847	106.414454057375	164.417315845536	-0.630407058436503	0.00161175107026583	0.0315718128309489	Gm15417	3	89296640	89306097	+	4019	lncRNA	predicted gene 15417 [Source:MGI Symbol;Acc:MGI:3642531]	-	107	109	128	126	97	89	230	244	118	142	165	100	1.80124129330254	1.83736094103073	1.84782636171847	1.7440156754755	1.40792828892686	1.37347937024114	3.54211743368402	3.29512555313357	1.83450032442331	2.55869134464806	2.54879297682498
ENSMUSG00000028452	3551.11014839464	4143.82755636739	3938.7254375775	3864.34888007583	3690.88027791244	3912.79857486815	5303.4624934204	4636.14071582409	4505.6022475356	4239.06285473694	4760.22225062407	3956.91283071657	3850.28181253266	4566.90056547628	-0.24648009283505	0.00163185466300925	0.0318804598038605	Vcp	4	42979963	43000507	-	4851	protein_coding	valosin containing protein [Source:MGI Symbol;Acc:MGI:99919]	-	3336	3856	4254	4327	4003	4004	5423	5447	4593	3676	4901	3467	46.5265543012881	53.850747819785	50.8786297034659	49.6196236283434	48.137232973896	51.1932774439014	69.192887639024	60.9433393660126	59.1587464058023	54.8771804999995	62.7223110147684
ENSMUSG00000020140	179.897366630304	130.031933174392	144.438450461234	155.395587042569	139.226310758126	141.697251087883	228.84201059568	239.169366834325	200.118192575063	162.597351065807	167.059421976605	271.631166342816	148.447816525751	211.569584898383	-0.51177655765114	0.00165672285036969	0.0321418969808887	Lgr5	10	115286216	115423685	-	10264	protein_coding	leucine rich repeat containing G protein coupled receptor 5 [Source:MGI Symbol;Acc:MGI:1341817]	-	169	121	156	174	151	145	234	281	204	141	172	238	1.11397689780934	0.798646724869236	0.881814326048916	0.94304072946751	0.858197235029003	0.876196469831149	1.41108228508184	1.48590082360531	1.24184477917461	0.994832652134232	1.040352289558
ENSMUSG00000024856	798.361094513184	769.445158288136	620.344626980941	635.871597553499	624.2133270414	683.078472485723	783.343805500597	974.551334609618	822.054144009326	827.978000462764	978.074639130471	779.512968958585	688.552379477147	860.91914877856	-0.323998210166741	0.0016581784795618	0.0321418969808887	Cdk2ap2	19	4147182	4149019	+	1636	protein_coding	CDK2-associated protein 2 [Source:MGI Symbol;Acc:MGI:1098779]	-	750	716	670	712	677	699	801	1145	838	718	1007	683	31.0158785294493	29.6493864726778	23.7607802901043	24.2099860665389	24.1397171123586	26.4998866700805	30.3041664259244	37.9858924449882	32.0047553024761	31.782547647788	38.2133220963051
ENSMUSG00000058254	141.576034093671	354.632545021068	199.991700638632	212.552584575467	202.846280574753	211.08004299988	523.207160977303	503.87282977196	298.215345798132	249.085303760386	359.372012391534	223.69625463526	220.446531317245	359.574817889096	-0.707999280858049	0.00165917299184851	0.0321418969808887	Tspan7	X	10351397	10462844	+	7067	protein_coding	tetraspanin 7 [Source:MGI Symbol;Acc:MGI:1298407]	-	133	330	216	238	220	216	535	592	304	216	370	196	1.27327635063739	3.16347813167134	1.77332303301574	1.87343966472513	1.81599394675025	1.89569646421779	4.68567126558665	4.54660015382158	2.68777112572954	2.21343219033751	3.25038837818803
ENSMUSG00000025810	830.295538293712	936.014990040456	1065.69651590308	999.354378739277	911.886234038322	1244.98136473077	1610.6956899619	1128.60704776625	970.180845376161	1433.39366932481	1377.26895559782	1344.46014265478	998.038170290937	1310.76772511362	-0.392733695539538	0.00167170900402339	0.0322322291796159	Nrp1	8	129085085	129229844	+	9785	protein_coding	neuropilin 1 [Source:MGI Symbol;Acc:MGI:106206]	-	780	871	1151	1119	989	1274	1647	1326	989	1243	1418	1178	5.39311766634096	6.03036102325146	6.82470193859881	6.36161088863309	5.89606508117505	8.07530135254592	10.4180369838318	7.35500277566285	6.3152311814303	9.19936521053114	8.99671627564323
ENSMUSG00000046364	3473.40300186203	3537.72829760411	3091.53837237218	2982.88080874815	2860.13255610402	2594.52552854019	4113.28844686081	3895.65192882814	3728.67279400889	3487.1942526454	3865.6773224819	3354.30251210729	3090.03476087178	3740.79787615541	-0.276142856074838	0.00168579530313846	0.0323514654892915	Rpl27a	7	109118354	109121574	+	2774	protein_coding	ribosomal protein L27A [Source:MGI Symbol;Acc:MGI:1347076]	-	3263	3292	3339	3340	3102	2655	4206	4577	3801	3024	3980	2939	79.5823464771192	80.3969101143392	69.8359680271202	66.9788760117141	65.232217745402	59.3619568496906	93.846036921876	89.5518583424635	85.6140820679358	78.9446842276903	89.0728275894368
ENSMUSG00000029580	6645.55775072774	5119.60437721324	6135.85648209358	6079.18253447566	6622.00903221763	6127.1845815243	10159.998496062	9915.74065345157	7564.27148503092	6611.13910397357	7347.70073984311	6021.53795640629	6121.56579304202	7936.73140579459	-0.374767971570732	0.00169023189862465	0.0323860033992324	Actb	5	142888870	142892509	-	2679	protein_coding	actin, beta [Source:MGI Symbol;Acc:MGI:87904]	-	6243	4764	6627	6807	7182	6270	10389	11650	7711	5733	7565	5276	157.661895793306	120.471696803271	143.520339203983	141.345140603291	156.386584326131	145.159334159671	240.023717767054	236.022474157244	179.842272333288	154.973267530894	175.309254328838
ENSMUSG00000017404	3798.06984696405	3745.13460423765	3520.2242862411	3418.70291493651	3504.6305112029	3299.10289429442	4079.05994100248	4083.75310345585	4250.54964915562	3998.04975989471	3750.09551309111	4298.1637497775	3547.64417631277	4076.61195272955	-0.200629892807875	0.00169320150585349	0.0323923689951597	Rpl19	11	97917536	97921318	+	1022	protein_coding	ribosomal protein L19 [Source:MGI Symbol;Acc:MGI:98020]	-	3568	3485	3802	3828	3801	3376	4171	4798	4333	3467	3861	3766	236.200097735514	231.013773790183	215.839244356442	208.362173228571	216.957056892106	204.880998663791	252.605277495474	254.805908742959	264.905871928701	245.669084662256	234.540328755689
ENSMUSG00000032207	3215.79848869911	3833.255418455	3281.34531047829	3336.53973098297	2997.51480976601	3210.17565395651	3161.73598399929	4503.36341608689	4018.05939601694	3980.75216935579	4075.47287566182	4554.9579196394	3312.43823538965	4049.05696012669	-0.289782546277934	0.00173628094191206	0.0330620194241302	Lipc	9	70705410	70859508	-	2150	protein_coding	lipase, hepatic [Source:MGI Symbol;Acc:MGI:96216]	-	3021	3567	3544	3736	3251	3285	3233	5291	4096	3452	4196	3991	95.0645044001831	112.395943544625	95.6366705654566	96.664331720243	88.2074600416381	94.7648008354438	93.0722837209315	133.567085175848	119.035165426092	116.273270667583	121.161779547047
ENSMUSG00000049685	69.1912948578093	188.062713268748	70.3674502247038	63.4085441380596	66.3860554608283	32.2483399027595	105.619389505698	174.482990039277	136.355042980067	152.218796742458	198.140244669927	174.620035506096	81.6107329754848	156.906083240587	-0.946386060090638	0.00175035124734653	0.0332603565642235	Cyp2g1	7	26508317	26520630	+	2145	protein_coding	cytochrome P450, family 2, subfamily g, polypeptide 1 [Source:MGI Symbol;Acc:MGI:109612]	-	65	175	76	71	72	33	108	205	139	132	204	153	2.05018089996683	5.52709259361622	2.05567990686457	1.84131841854908	1.95808710311772	0.954194224546091	3.11637408802152	5.18712497152925	4.04893957463618	4.45650293137186	5.90434185397289
ENSMUSG00000021807	968.67812800933	896.253159235064	991.62551566655	936.838912687669	930.326804999664	959.632417712418	1142.25413835792	1025.61952681624	1118.307546743	1048.23398665829	1151.93299107124	1152.72049582455	947.225823051782	1106.51144757854	-0.223906824846229	0.00175211290482434	0.0332603565642235	Rtraf	14	19861419	19873892	-	1927	protein_coding	RNA transcription, translation and transport factor [Source:MGI Symbol;Acc:MGI:1915295]	-	910	834	1071	1049	1009	982	1168	1205	1140	909	1186	1010	31.9496276211749	29.3204292490114	32.2460817990907	30.2824925277514	30.5447277555296	31.6067552427488	37.5158036151261	33.939503061845	36.9638269567929	34.1609335365991	38.2095214196898
ENSMUSG00000047676	356.601288882556	375.050782461675	299.061663454991	350.979687975456	276.608564420118	331.278400819256	429.32325919446	582.17739115544	414.950958133586	402.457273205438	359.372012391534	453.099046378563	331.596731335675	440.229990076503	-0.410772057070571	0.00177558139087645	0.0335451946076593	Rpsa-ps10	3	149778295	149779179	-	885	processed_pseudogene	ribosomal protein SA, pseudogene 10 [Source:MGI Symbol;Acc:MGI:3704228]	-	335	349	323	393	300	339	439	684	423	349	370	397	25.6098868351789	26.7157975854339	21.175245142321	24.7028536175792	19.7744672136888	23.757818912851	30.7025449032842	41.9481659954708	29.8642002109704	28.5581268356414	25.9553612075196
ENSMUSG00000001911	2322.69854430369	2863.92646206408	2873.95480917738	2293.42452600756	2270.0342853411	2574.98108011428	3304.51775129403	3336.45522416568	2742.79640411703	2867.94051135222	3770.4923029836	2798.48579778397	2533.16995116802	3136.78133194942	-0.308655260844944	0.00178034568456975	0.0335451946076593	Nfix	8	85426505	85526973	-	7351	protein_coding	nuclear factor I/X [Source:MGI Symbol;Acc:MGI:97311]	CTF/NFI	2182	2665	3104	2568	2462	2635	3379	3920	2796	2487	3882	2452	20.0823460594493	24.5604759542629	24.4987815375939	19.4332949316065	19.5374748913482	22.2322970764701	28.4508269889534	28.9427498569012	23.765367589311	24.5006115280546	32.785192050987
ENSMUSG00000031444	9321.66413953594	10482.0783155621	9898.66329410932	9706.86572164182	9405.61321883208	9022.69461582358	10738.9492237229	10945.6158629517	10780.8771392154	10432.7534403713	11519.3299107124	11176.8235798117	9639.59655091748	10932.3915261309	-0.181612103717728	0.00178184827134638	0.0335451946076593	F10	8	13087308	13106676	+	2731	protein_coding	coagulation factor X [Source:MGI Symbol;Acc:MGI:103107]	-	8757	9754	10691	10869	10201	9233	10981	12860	10990	9047	11860	9793	216.940068346143	241.961929558392	227.125462438089	221.393942355353	217.895295912917	209.686888645263	248.870440826554	255.575615475691	251.437346084167	239.900112715844	269.607278563684
ENSMUSG00000068328	2463.21009693801	2645.77371467233	2517.48812053907	2564.02718620238	2404.65045335889	2442.07883081806	2801.84769383172	3299.00521654749	2780.0733223418	2783.75890406283	2799.2165938173	2920.60569189608	2506.20473375479	2897.41790374954	-0.209618836003089	0.0017980020790399	0.0336632035590976	Aup1	6	83031502	83034789	+	3276	protein_coding	ancient ubiquitous protein 1 [Source:MGI Symbol;Acc:MGI:107789]	-	2314	2462	2719	2871	2608	2499	2865	3876	2834	2414	2882	2559	47.7887405016079	50.9131706191546	48.1542374173029	48.7514059156592	46.439817141403	47.3121303004104	54.1294804805986	64.2155227311618	54.0517481584911	53.3630856960896	54.6158512647784
ENSMUSG00000025207	10996.0934750949	13125.7027420828	12250.4175516192	11045.5897732327	10278.7742538516	11668.0357102712	14293.8240464379	13006.2174184887	12317.0785586887	15691.2209642017	15993.0258271324	12479.055347867	11560.7689176921	13963.4036938027	-0.272424779868509	0.00180464273132099	0.0337361065846033	Sema4g	19	44977540	44991836	+	8661	protein_coding	sema domain, immunoglobulin domain (Ig), transmembrane domain (TM) and short cytoplasmic domain, (semaphorin) 4G [Source:MGI Symbol;Acc:MGI:1347047]	-	10330	12214	13231	12368	11148	11940	14616	15281	12556	13607	16466	10934	80.6934726924944	95.5379383264414	88.6326687060117	79.4381795686331	75.0854397263248	85.5039992691631	104.451245123169	95.7599441285258	90.5809894238855	113.77370685159	118.028991475945
ENSMUSG00000115869	9.58033313415821	17.1943052131427	22.2213000709591	12.5030932103216	3.68811419226824	5.86333452777445	27.3828046866626	33.1943249343014	37.2769182247666	18.4507632415101	57.3052668408121	19.402226167344	11.8417467247707	32.1687173492328	-1.44651947375138	0.00181227053248779	1	Gm31814	16	24004770	24081909	-	3142	lncRNA	predicted gene, 31814 [Source:MGI Symbol;Acc:MGI:5590973]	-	9	16	24	14	4	6	28	39	38	16	59	17	0.193794948214561	0.344984664568352	0.443173982400532	0.2478675648821	0.0742643899177365	0.118439130354225	0.551575511370949	0.673687630208007	0.755668306235306	0.368774908388505	1.16577424041378
ENSMUSG00000041459	1532.85330146531	1653.87723268916	1580.48996754697	1574.49666641407	1541.63173236812	1425.76751267049	1842.4715724883	1793.34468298905	1929.57100389778	1810.48114307317	1733.72714086186	1669.73275781319	1551.51940219235	1796.55471685389	-0.211821058135688	0.0018354248734854	0.0341555883274965	Tardbp	4	148696839	148711476	-	7796	protein_coding	TAR DNA binding protein [Source:MGI Symbol;Acc:MGI:2387629]	-	1440	1539	1707	1763	1672	1459	1884	2107	1967	1570	1785	1463	12.4967414528507	13.373736971985	12.7037192051646	12.5799329698325	12.5109776917392	11.6073639411017	14.9576095968384	14.668741390645	15.7647221665036	14.5839572904854	14.2146121308047
ENSMUSG00000071655	1454.08167347335	1447.54557013145	1315.68614170137	1264.59857041539	1291.76199584195	1098.39800153641	1889.41352337972	1735.46739848822	1698.06172229134	1451.84443256632	1546.27092899276	1388.97113209751	1312.01199218332	1618.33818963598	-0.30358165648918	0.00186449458873297	0.0346440583038098	Ubxn1	19	8848860	8853227	+	3047	protein_coding	UBX domain protein 1 [Source:MGI Symbol;Acc:MGI:1289301]	-	1366	1347	1421	1416	1401	1124	1932	2039	1731	1259	1592	1217	30.3308351193649	29.9489175059764	27.0576963610411	25.8516724324895	26.8220821367953	22.879366604968	39.2453126728582	36.3199229427646	35.4959174277477	29.9227040850686	32.4368918586279
ENSMUSG00000038224	15929.9650391864	16937.4652790214	15630.8328249138	12782.6266513809	14980.1978204455	14936.8447095054	21651.9748486682	16138.3998738279	19157.3930529333	15904.5579141817	20302.5761487033	17824.9393106811	15199.6553874089	18496.6401914992	-0.283277835024464	0.00188322734553056	0.0349392722927588	Serpinf2	11	75322558	75330417	-	2324	protein_coding	serine (or cysteine) peptidase inhibitor, clade F, member 2 [Source:MGI Symbol;Acc:MGI:107173]	-	14965	15761	16882	14313	16247	15285	22140	18961	19529	13792	20903	15618	435.659030354613	459.44510980902	421.460586684652	342.603971270189	407.815627375803	407.924189734146	589.650428509149	442.817995204193	525.046385988977	429.772563244002	558.394485345504
ENSMUSG00000032492	281.023105268641	195.585221799498	174.066850555846	192.904866673533	177.029481228876	276.553945226695	399.006582577083	428.12167799881	278.595915153518	292.905866458972	326.348638279879	205.435335889525	216.193911792182	321.735669392965	-0.576350007303534	0.0019123181155319	0.0353189339773876	Pth1r	9	110551153	110576213	-	2925	protein_coding	parathyroid hormone 1 receptor [Source:MGI Symbol;Acc:MGI:97801]	-	264	182	188	216	192	283	408	503	284	254	336	180	6.10638495743968	4.2153292847313	3.72907548017186	4.10795545772075	3.82914811276354	6.00082145658986	8.6335104364448	9.33345120893377	6.06661258089373	6.28862080315806	7.13151878832804
ENSMUSG00000075602	123.479849284706	106.389763506321	95.3664128045328	139.320181486441	121.707768344852	125.084469925855	392.160881405417	325.985293585575	134.393099915606	95.7133343153334	218.537034562419	126.68512379854	118.558074225451	215.579127930482	-0.86472570610034	0.00194097230687463	0.0356871584925662	Ly6a	15	74866726	74869880	-	1205	protein_coding	lymphocyte antigen 6 complex, locus A [Source:MGI Symbol;Acc:MGI:107527]	-	116	99	103	156	132	128	401	383	137	83	225	111	6.51293982163738	5.56588380660283	4.95928849337326	7.20170614475941	6.39018882407504	6.58829539271658	20.5973074376922	17.2509046189061	7.10374416012693	4.98813969185709	11.5921527429569
ENSMUSG00000031983	374.697473691521	380.424002840782	349.985476117606	384.916655260615	402.926475505305	378.185077041452	489.956612429212	525.151243191384	555.229887242576	461.269081037751	412.79217639568	410.870671779049	378.52252674288	475.878278679275	-0.331375217575656	0.00197843133025468	0.036224212019706	2310022B05Rik	8	125362495	125390108	-	3307	protein_coding	RIKEN cDNA 2310022B05 gene [Source:MGI Symbol;Acc:MGI:1916801]	-	352	354	378	431	437	387	501	617	566	400	425	360	7.20136115331562	7.25195424270699	6.6317294466477	7.25004864353687	7.70857405761323	7.25816622874416	9.37684326126926	10.126307611268	10.6938977694547	8.75937981672726	7.97853875414011
ENSMUSG00000028789	53.2240729675456	49.4336274877853	43.5167126389616	33.9369672851586	32.2709991823471	42.9977865370126	97.7957310237949	101.285247876458	67.6870357239182	36.9015264830201	107.81160371746	55.924063658815	42.5633610164685	77.9008680805777	-0.880036491754831	0.001982534103807	0.0362343509865441	Azin2	4	128824026	128856235	-	4024	protein_coding	antizyme inhibitor 2 [Source:MGI Symbol;Acc:MGI:2442093]	-	50	46	47	38	35	44	100	119	69	32	111	49	0.840655687113637	0.774436560937393	0.677655677155983	0.525319436535488	0.507384130172309	0.678179791799657	1.5381374757948	1.60505210760765	1.07138339342368	0.575890040833341	1.71251202798122
ENSMUSG00000021990	639.753357069898	494.336274877853	470.350851501968	444.752887052869	621.447241397198	564.834559508939	787.255634741549	1084.34794785385	616.050122240879	619.253741293181	777.020567333046	578.642862755494	539.245861901454	743.761812702999	-0.465423331208117	0.00199676812703929	0.0363323053871061	Spata13	14	60871450	61002005	+	9102	protein_coding	spermatogenesis associated 13 [Source:MGI Symbol;Acc:MGI:104838]	-	601	460	508	498	674	578	805	1274	628	537	800	507	4.46728606779194	3.42378897078891	3.23814339143804	3.04361949219999	4.31966305877582	3.93859338784846	5.47409304338785	7.59683587281655	4.31098591930101	4.27252897219113	5.45659573925655
ENSMUSG00000023927	5.32240729675456	4.29857630328568	14.8142000473061	11.6100151238701	6.45419983646942	5.86333452777445	24.4489327559487	24.6829595665318	18.6384591123833	11.5317270259438	28.1669955658229	25.1087632753863	8.06045552257671	22.0963062170028	-1.4459537055134	0.00200742441451609	1	Satb1	17	52043215	52140318	-	19027	protein_coding	special AT-rich sequence binding protein 1 [Source:MGI Symbol;Acc:MGI:105084]	CUT	5	4	16	13	7	6	25	29	19	10	29	22	0.0177789377460728	0.0142421534670963	0.0487886565653185	0.038007637849876	0.0214612260452344	0.019558298605822	0.0813247648420441	0.0827232953566568	0.0623931733376605	0.0380607413858163	0.0946229107414911
ENSMUSG00000085826	46.8371842114401	54.8068478668924	46.2943751478315	46.4400604954803	83.9045978741025	50.8155659073786	80.1924994395118	127.670480516544	75.5348079817638	96.8665070179278	102.955225171629	66.1958304532913	54.8497719171875	91.5692250967778	-0.741187487476887	0.00202518423470154	0.0367948413766337	Gm15638	16	45765926	45791733	+	6489	lncRNA	predicted gene 15638 [Source:MGI Symbol;Acc:MGI:3783082]	-	44	51	50	52	91	52	82	150	77	84	106	58	0.458755226807188	0.532449458889678	0.447055482580287	0.445782909767046	0.818069921947105	0.497022111105839	0.78214847682703	1.25462411780502	0.741424175328015	0.9374520729423	1.01413720303275
ENSMUSG00000119987	137.318108256268	171.943052131427	119.439487881405	109.84860463354	128.161968181321	134.856694138812	242.533412939011	233.211411076887	153.031559027989	160.291005660619	162.203043430773	208.85925815435	133.594652537129	193.354948381605	-0.536771760315768	0.00204093417980687	0.0370262239237637	ENSMUSG00000119987	3	57213269	57295213	-	2953	lncRNA	novel transcript	-	129	160	129	123	139	138	248	274	156	139	167	183	2.95550968207207	3.67064617701918	2.53451845861016	2.31707189612805	2.74585854418324	2.89844977791346	5.19806085419701	5.03601787271628	3.30076756588169	3.4087795449496	3.51092577375766
ENSMUSG00000038520	938.872647147504	911.298176296563	787.930265016091	774.298700953488	807.697008106745	733.894038393102	1141.27618104769	1144.77864196501	1016.286507391	951.367479640362	938.252335054652	900.491555649083	825.665139318916	1015.40878345797	-0.299874358655382	0.00204443444030631	0.0370350203478497	Tbc1d17	7	44484047	44498503	-	9726	protein_coding	TBC1 domain family, member 17 [Source:MGI Symbol;Acc:MGI:2449973]	-	882	848	851	867	876	751	1167	1345	1036	825	966	789	6.13536554333073	5.90673619698843	5.07650116290443	4.95886947828529	5.25407959835643	4.78912102315623	7.42659458300659	7.50564753313281	6.65547845613553	6.14281229937322	6.16611307943616
ENSMUSG00000022193	1147.51101318028	1182.10848340356	1078.65894094447	1073.47985991476	1064.94297301745	839.434059893042	1139.32026642721	1363.52073191669	1309.59699552798	1381.50089770807	1272.37117900786	1313.64484227135	1064.35588839226	1296.65915214319	-0.285003812836921	0.00207332894201638	0.0373967422772753	Psmb5	14	54851576	54855479	-	899	protein_coding	proteasome (prosome, macropain) subunit, beta type 5 [Source:MGI Symbol;Acc:MGI:1194513]	-	1078	1100	1165	1202	1155	859	1165	1602	1335	1198	1310	1151	81.1269581039156	82.89321452177	75.1857313866509	74.3776788820269	74.9461105826933	59.2629972497564	80.2083087989656	96.7170333889485	92.7844858991109	96.5038607524823	90.4649250396471
ENSMUSG00000043424	22.3541106463692	26.8661018955355	48.1461501537447	17.8615617290309	24.8947707978106	25.4077829536893	60.6333532347528	27.2363691768627	36.2959466925359	81.8752618842009	66.0467482233089	70.7610601397251	27.5884130293634	57.1414565585644	-1.04456762834332	0.00207487590443134	0.0373967422772753	Eif3j2	18	43608483	43610861	-	2379	protein_coding	eukaryotic translation initiation factor 3, subunit J2 [Source:MGI Symbol;Acc:MGI:3704486]	-	21	25	52	20	27	26	62	32	37	71	68	62	0.597215369347211	0.711920591683588	1.26817181484742	0.467663417317936	0.662058139373819	0.677842891754054	1.61305944750355	0.73005517392175	0.971764598936741	2.16128215934018	1.77452897250551
ENSMUSG00000052656	1742.55614895744	1723.72909761756	1783.25933069447	1780.79770438438	1909.52112304688	1760.95480317493	1955.9146204759	2195.08112834778	2066.90701841008	1910.80716819889	2243.64688817417	2002.99452492287	1783.46970131261	2062.55855808828	-0.210027177729609	0.00208631868468932	0.0374075417304441	Rnf103	6	71470878	71487865	+	6602	protein_coding	ring finger protein 103 [Source:MGI Symbol;Acc:MGI:109483]	-	1637	1604	1926	1994	2071	1802	2000	2579	2107	1657	2310	1755	16.7756471367931	16.4594315451976	16.9258293516167	16.8014776732804	18.2991697544185	16.9289260104641	18.7502732584014	21.2019579594329	19.9408105475579	18.175842480438	21.722263804004
ENSMUSG00000113902	451.340138764787	397.618308053925	345.356038602823	288.464221923848	435.197474687652	275.576722805399	480.177039326833	577.921708471555	499.314509905426	475.107153468884	485.637854583153	421.142438573526	365.592150806406	489.883450721563	-0.424052197032697	0.00209763776573116	0.0375556662371867	Ndufb1	12	101934349	101943327	-	1153	protein_coding	NADH:ubiquinone oxidoreductase subunit B1 [Source:MGI Symbol;Acc:MGI:3780865]	-	424	370	373	323	472	282	491	679	509	412	500	369	24.8795586750529	21.7399431888168	18.7693278208305	15.58371726562	23.8802846039378	15.1694537171985	26.3575664742043	31.9624906412059	27.5830487392018	25.8770920429615	26.9221240344282
ENSMUSG00000024608	4084.41535952945	3773.075350209	3410.04367338926	3610.71470352359	3488.03399733769	3702.69575428957	4388.09445103768	4640.39639850798	4067.10797262848	4167.56614717608	4046.33460438683	4171.47862597896	3678.16313971309	4246.82969995267	-0.207755066367673	0.00210865670278951	0.0376979936297828	Rps14	18	60880170	60911618	+	2394	protein_coding	ribosomal protein S14 [Source:MGI Symbol;Acc:MGI:98107]	-	3837	3511	3683	4043	3783	3789	4487	5452	4146	3614	4166	3655	108.436071735464	99.3556734606042	89.2579211901839	93.9458154511039	92.1804878590999	98.1636276492624	116.007227920044	123.603807210196	108.207893705989	109.323005807076	108.034817663095
ENSMUSG00000032744	27.6765179431237	10.7464407582142	11.1106500354795	2.67923425935463	11.0643425768047	7.81777937036593	44.0080789607077	27.2363691768627	31.3910890313824	27.6761448622651	33.9946498208207	20.5435335889525	11.8491608238905	30.8083109068318	-1.39159592410671	0.00212484427854479	1	Heyl	4	123127349	123143668	+	5113	protein_coding	hairy/enhancer-of-split related with YRPW motif-like [Source:MGI Symbol;Acc:MGI:1860511]	bHLH	26	10	12	3	12	8	45	32	32	24	35	18	0.344035832617161	0.132498266193253	0.136167871377124	0.0326394857167819	0.136909082606021	0.0970430269438622	0.544740727785885	0.339683406759211	0.391046116617716	0.339924925334446	0.424972546610346
ENSMUSG00000031848	476.887693789209	407.290104736318	425.908251360049	384.023577174164	412.146760985976	413.365084208099	566.237282627772	573.66602578767	549.344058049191	453.196872119591	487.580406001486	490.762191291642	419.936912042302	520.131139312892	-0.310730378385469	0.00212576914413234	0.0379172144151358	Lsm4	8	71125898	71131402	+	1038	protein_coding	LSM4 homolog, U6 small nuclear RNA and mRNA degradation associated [Source:MGI Symbol;Acc:MGI:1354692]	-	448	379	460	430	447	423	579	674	560	393	502	430	29.2002643787184	24.7359072911823	25.7116337605627	23.0445879582721	25.1210030744998	25.2751158033668	34.5250515636263	35.2421739042671	33.7088910401365	27.4184410842712	30.0244449400217
ENSMUSG00000060450	1079.38419978182	1269.1546535451	1288.83540411563	1210.12080714184	1275.16548197674	1154.09967955027	1490.40694080263	1444.3787029105	1419.46580713782	1334.2208169017	1579.29430310442	1327.34053133065	1212.79337101857	1432.51785036462	-0.24046452762358	0.00212709336688068	0.0379172144151358	Rnf14	18	38417590	38450902	+	4778	protein_coding	ring finger protein 14 [Source:MGI Symbol;Acc:MGI:1929668]	-	1014	1181	1392	1355	1383	1181	1524	1697	1447	1157	1626	1163	14.3581317025304	16.7451769148063	16.902941368092	15.7757855857906	16.8850690794827	15.3304143255087	19.7420363515274	19.2768400488924	18.9223982007604	17.5361711466001	21.12725234534
ENSMUSG00000015671	961.226757793874	1044.55404169842	1052.73409086169	1044.90136114831	894.367691625048	1014.35687330498	1205.82136352339	1091.15704014806	1171.28000948345	1352.67158014321	1109.19685986792	1231.47070791554	1002.02346940539	1193.5995935136	-0.25157681512145	0.00214943587211871	0.0381493806089047	Psma2	13	14787825	14848821	+	3673	protein_coding	proteasome subunit alpha 2 [Source:MGI Symbol;Acc:MGI:104885]	-	903	972	1137	1170	970	1038	1233	1282	1194	1173	1142	1079	16.6330902908009	17.9279785805829	17.9600992163843	17.7199616888819	15.4055643702615	17.5277659488497	20.7775948674209	18.9438062698247	20.3112751867859	23.1272846448712	19.3025105860912
ENSMUSG00000028467	357.665770341906	344.960748338676	371.280888685608	267.923425935463	220.364822988027	288.280614282244	428.345301884222	494.510327867413	382.578897569973	378.240646450956	383.653905120691	416.577208887092	308.412711761987	413.984381296724	-0.426684952754985	0.00215362121446357	0.0381685075844756	Gba2	4	43566928	43578873	-	4481	protein_coding	glucosidase beta 2 [Source:MGI Symbol;Acc:MGI:2654325]	-	336	321	401	300	239	295	438	581	390	328	395	365	5.07306534676015	4.85306464739564	5.1920471038244	3.72429570341231	3.11135641798958	4.08316765357539	6.04995706033932	7.03722335513466	5.4380532370278	5.30086155416469	5.47256307057344
ENSMUSG00000021715	109.641590313144	90.2701023689992	96.2923003074894	79.4839496941874	84.8266264221695	80.1322385462508	124.200578400219	187.250038090931	105.944925480915	123.389479177599	135.978599283283	123.261201533715	90.1078012753734	133.337470327777	-0.56978095946464	0.00216118197953271	0.0382473156666005	Cwc27	13	104767648	104953650	-	2873	protein_coding	CWC27 spliceosome-associated protein [Source:MGI Symbol;Acc:MGI:1914535]	-	103	84	104	89	92	82	127	220	108	107	140	108	2.42553598294023	1.98074992495206	2.10023024540343	1.72326562847449	1.86800918962588	1.77022457947465	2.73603230327178	4.15611160945838	2.34877773430179	2.69709170620356	3.02524835477717
ENSMUSG00000067144	254.411068784868	611.472479142388	384.243313727001	379.558186741906	306.113477958264	365.481185564607	1283.07999103219	503.021693235183	816.168314815941	506.242816438932	645.898346595594	499.89265066451	383.546618653172	709.050635463725	-0.886865652631757	0.00218122812891271	0.0385465379558358	Slc22a7	17	46743109	46749383	-	2101	protein_coding	solute carrier family 22 (organic anion transporter), member 7 [Source:MGI Symbol;Acc:MGI:1859559]	-	239	569	415	425	332	374	1312	591	832	439	665	438	7.69622882343571	18.3473016821148	11.460174735672	11.2528031809789	9.21804530656204	11.0406766295647	38.6510154488765	15.2672766528895	24.7429265354241	15.1316410217392	19.6500751954095
ENSMUSG00000035545	2260.95861966134	2868.22503836737	2672.11133353283	2395.23542786304	2637.00164747179	2078.55209009604	2757.83961487102	3815.64509437111	2886.01824782272	3107.80043349185	3567.49567976785	2594.19176931605	2485.34735949873	3121.49847327343	-0.329076495161316	0.00218940951986289	0.0386355283375805	Leng8	7	4140038	4151176	+	6395	protein_coding	leukocyte receptor cluster (LRC) member 8 [Source:MGI Symbol;Acc:MGI:2142195]	-	2124	2669	2886	2682	2860	2127	2820	4483	2942	2695	3673	2273	22.4708803190735	28.2744400615801	26.1833356508948	23.3300715058789	26.0886911465039	20.628948008541	27.2936542163052	38.0476937207798	28.7445762936459	30.5186826037164	35.6573450195335
ENSMUSG00000027358	175.639440792901	198.809154026963	183.325725585413	191.11871050063	162.277024459803	324.437843870186	417.587771471604	674.951273664128	240.338025396521	196.039359441044	245.732754419076	324.131307736806	205.934649872649	349.796748688196	-0.766007955809562	0.00221305014939068	0.0389408050642068	Bmp2	2	133394079	133404805	+	3555	protein_coding	bone morphogenetic protein 2 [Source:MGI Symbol;Acc:MGI:88177]	-	165	185	198	214	176	332	427	793	245	170	253	284	3.14015049235426	3.52547883216678	3.2314302066935	3.34866739433285	2.88801782766448	5.79226761341903	7.43432247963283	12.1069215734578	4.30606192506386	3.46303497831639	4.41824240785317
ENSMUSG00000022505	545.014507187667	438.454782935139	365.725563667868	303.646549393525	435.197474687652	424.114530842352	565.259325317534	566.005796956678	531.686570469039	462.422253740346	611.903696774773	572.936325647452	418.692234785701	551.70232815097	-0.399814386292655	0.00221690660220427	0.0389528567786449	Emp2	16	10099613	10131832	-	8644	protein_coding	epithelial membrane protein 2 [Source:MGI Symbol;Acc:MGI:1098726]	-	512	408	395	340	472	434	578	665	542	401	630	502	4.00738737689028	3.1976534370524	2.65125519540277	2.18807399197007	3.18532718051137	3.11404663054665	4.13872152603171	4.17548602019933	3.91776444098645	3.35951957734288	4.52474819004357
ENSMUSG00000059534	1950.13003353087	1930.06076017527	1530.49204238731	1502.1573414115	1647.66501539584	1594.82699155465	1908.97266958448	2441.05958747632	1990.39123889609	1997.29512089346	2079.50129332506	1947.07046126405	1692.55536407591	2060.71506190658	-0.284779676267837	0.00227229007631114	0.0395118558598081	Uqcr10	11	4651973	4654342	-	584	protein_coding	ubiquinol-cytochrome c reductase, complex III subunit X [Source:MGI Symbol;Acc:MGI:1913402]	-	1832	1796	1653	1682	1787	1632	1952	2868	2029	1732	2141	1706	212.235850151361	208.343268586096	164.221192559731	160.217883202272	178.500120012059	173.323498869605	206.880754716984	266.542487699231	217.081588910878	214.774443499077	227.60009758233
ENSMUSG00000118642	827.102093915659	593.203529853423	558.310164282847	502.802962672219	638.965783810473	436.818422319197	810.72661018726	839.220625262081	734.747677640793	756.481292901912	709.031267691404	836.578340039009	592.867159475636	781.130968953743	-0.398643881482648	0.00230197253829494	0.0398770475533687	AY036118	17	40158994	40159718	-	714	pseudogene	cDNA sequence AY036118 [Source:MGI Symbol;Acc:MGI:2158419]	-	777	552	603	563	693	447	829	986	749	656	730	733	73.6256140841031	52.3753398523037	48.9991217074925	43.863979334527	56.6189524486061	38.8292901879365	71.8636786128009	74.9512447976718	65.54467248361	66.5354639333669	63.4736206681733
ENSMUSG00000028952	483.274582545314	600.726038384173	451.833101442835	475.117541992221	449.949931456725	455.385648323816	665.988928272043	601.75353150131	615.069150708648	605.415668862049	535.172915750635	590.055936971579	486.047807357514	602.242688677711	-0.310329575827223	0.0023105630655575	0.0399132708455375	Zbtb48	4	152104231	152112128	-	3199	protein_coding	zinc finger and BTB domain containing 48 [Source:MGI Symbol;Acc:MGI:2140248]	ZBTB	454	559	488	532	488	466	681	707	627	525	551	517	9.60169122954145	11.8381422941785	8.85064205635624	9.25113966135144	8.89881931879538	9.03486810300129	13.1760731571411	11.9951399845968	12.2463619881704	11.8848204542876	10.6931579652669
ENSMUSG00000031320	3743.78129253716	4246.99338764625	3761.88092451278	3971.51825045001	3626.33827954775	3967.52303046071	4618.89237625383	4456.55090656416	4698.85363938505	3993.43706908433	4462.04060791001	4597.18629423892	3886.33919419244	4471.16014890605	-0.202441796270129	0.00231946169284492	0.0399925010071903	Rps4x	X	101228547	101233000	-	1631	protein_coding	ribosomal protein S4, X-linked [Source:MGI Symbol;Acc:MGI:98158]	-	3517	3952	4063	4447	3933	4060	4723	5236	4790	3463	4594	4028	145.889666113458	164.15305246488	144.531349068316	151.673955757137	140.668479262258	154.391082684067	179.23264348174	174.239182075156	183.499693909718	153.760963724272	174.8661118329
ENSMUSG00000058152	60.675443183002	61.2547123218209	91.6628627927063	129.496322535474	68.2301125569624	92.8361300230955	127.134450330933	133.628436273983	120.659498464376	123.389479177599	132.093496446618	143.804735122667	84.0259305688435	130.118349302696	-0.626702318980255	0.00232297951790569	0.0399925010071903	Chsy3	18	59308473	59669071	+	7228	protein_coding	chondroitin sulfate synthase 3 [Source:MGI Symbol;Acc:MGI:1926173]	-	57	57	99	145	74	95	130	157	123	107	136	126	0.533534902163477	0.534247747615216	0.79466895301573	1.11595762396865	0.597228305582218	0.815183914855024	1.11321316593494	1.17891272492951	1.06326314201182	1.07204544437228	1.16812518693708
ENSMUSG00000036390	47.901665670791	52.6575597152495	28.7025125916555	77.6977935212843	46.101427403353	36.1572295879424	188.745760875924	111.498886317782	57.8773204016112	94.560161612739	102.955225171629	35.3805300698626	48.203031415046	98.5029807415912	-1.03241293110024	0.00232721623183549	0.0399925010071903	Gadd45a	6	67012080	67014441	-	1764	protein_coding	growth arrest and DNA-damage-inducible 45 alpha [Source:MGI Symbol;Acc:MGI:107799]	-	45	49	31	87	50	37	193	131	59	82	106	31	1.72591759435983	1.88184343068362	1.01960582562776	2.74358561430117	1.65347727552103	1.30092806691233	6.77192054479291	4.03062933846265	2.08981201923393	3.36637763948583	3.7305761397276
ENSMUSG00000001155	10982.2552161234	10199.4469236211	10030.1393195292	10883.0495614985	9744.91972452076	9882.65034656384	11618.1328456268	13413.0606830681	11097.7309441259	11146.5673432773	12206.021837093	11588.8355590124	10287.0768486428	11845.0582020339	-0.203565997174844	0.0023337596460779	0.0399925010071903	Ftcd	10	76411482	76426172	+	3192	protein_coding	formiminotransferase cyclodeaminase [Source:MGI Symbol;Acc:MGI:1339962]	-	10317	9491	10833	12186	10569	10113	11880	15759	11313	9666	12567	10154	218.673759205391	201.435067676145	196.904234371422	212.371451970162	193.151383065588	196.502131119753	230.359795134297	267.957501535052	221.446436594764	219.296383674156	244.420346898484
ENSMUSG00000020131	910.13164774503	1219.72102605731	1135.13807862483	851.103416388321	709.961982011636	730.962371129215	1202.88749159268	1262.23548404023	1463.6095260882	1028.63005071419	1224.77866925871	1172.1227219919	926.16975365939	1225.71065728098	-0.40494415977992	0.00236085749058223	0.0401607364256662	Pcsk4	10	80157117	80165332	-	2958	protein_coding	proprotein convertase subtilisin/kexin type 4 [Source:MGI Symbol;Acc:MGI:97514]	-	855	1135	1226	953	770	748	1230	1483	1492	892	1261	1027	19.5557316066816	25.9946323792199	24.0470327954309	17.9222518613726	15.1851596605457	15.6838820816197	25.7371271101957	27.2109139065759	31.5155176750068	21.8380696383486	26.4658313480381
ENSMUSG00000038213	442.824287089979	473.918037437246	449.055438933965	329.545813900619	434.275446139585	383.071189147931	497.780270911116	515.788741286837	549.344058049191	478.566671576667	685.720650671413	514.72964714542	418.781702108221	540.321673273441	-0.368916139185381	0.0023858577482674	0.0403122804710792	Tapbpl	6	125200896	125208823	-	2352	protein_coding	TAP binding protein-like [Source:MGI Symbol;Acc:MGI:2384853]	-	416	441	485	369	471	392	509	606	560	415	706	451	11.9663619875615	12.7024431571144	11.9639231958741	8.72744044549251	11.6818169515561	10.3371040992493	13.3947184869155	13.9841300330632	14.8766279335296	12.7778663449996	18.6352836413751
ENSMUSG00000100691	95.8033313415821	84.8968819898921	74.0710002365303	96.4524333367667	100.50111173931	117.266690555489	150.605425776644	183.845491943823	141.259900641221	131.461688095759	112.667982263292	116.413357004064	94.8319081999283	139.375640954134	-0.558200741704971	0.00238617716190153	0.0403122804710792	2010320M18Rik	8	71229401	71230472	+	1072	lncRNA	RIKEN cDNA 2010320M18 gene [Source:MGI Symbol;Acc:MGI:1919343]	-	90	79	80	108	109	120	154	216	144	114	116	102	5.6800720829305	4.99250253438825	4.32976571113953	5.60437020234758	5.93141784753884	6.94283111143611	8.89158247388187	10.9360153886464	8.39308262518538	7.70118626899847	6.7178735920834
ENSMUSG00000035637	4246.21654135079	4673.62708574735	4641.47405232158	3628.57626525262	4337.22229010745	4207.91974609946	5161.65868343589	5225.12719927375	5410.0580002523	5969.9750813311	5115.70916017894	4179.46777793022	4289.17266347988	5176.99931706703	-0.271516949269305	0.0024043971263307	0.0405642932769144	Grhpr	4	44981395	44990734	+	1603	protein_coding	glyoxylate reductase/hydroxypyruvate reductase [Source:MGI Symbol;Acc:MGI:1923488]	-	3989	4349	5013	4063	4704	4306	5278	6139	5515	5177	5267	3662	168.359116112872	183.798462184373	181.440142129276	140.997413262472	171.182986045488	166.606002188525	203.792871736206	207.856810034441	214.964025467465	233.879525720725	203.985087791143
ENSMUSG00000019302	1041.06286724519	1239.0646194221	1036.06811580847	862.713431512191	896.211748721182	1103.28411364289	1366.20636240241	1409.48210490264	1463.6095260882	1203.91230150853	1255.85949195203	1048.86152045818	1029.734149392	1291.321884552	-0.327739712113311	0.00242713782398337	0.0408740319664064	Atp6v0a1	11	100900278	100954545	+	6556	protein_coding	ATPase, H+ transporting, lysosomal V0 subunit A1 [Source:MGI Symbol;Acc:MGI:103286]	-	978	1153	1119	966	972	1129	1397	1656	1492	1044	1293	919	10.0926690612461	11.9145145089713	9.90285310131982	8.19664312558108	8.64876560227751	10.6808333081627	13.1889610860735	13.7094974284353	14.2194785360998	11.5321190101775	12.2441376608061
ENSMUSG00000024975	1041.06286724519	1199.3027886167	992.551403169506	1094.91373398959	1353.53790856244	1012.40242846239	1530.50319052239	1536.30144888241	1309.59699552798	1224.66941015523	1764.80796355518	1151.57918840295	1115.6285216743	1419.57636617436	-0.348167070279239	0.00246556957529161	0.0412947368701606	Pdcd4	19	53880662	53918291	+	3135	protein_coding	programmed cell death 4 [Source:MGI Symbol;Acc:MGI:107490]	-	978	1116	1072	1226	1468	1036	1565	1805	1335	1062	1817	1009	21.1060728438691	24.1164088265215	19.839304142704	21.7545833616273	27.3158876285808	20.4961528168848	30.8979682362562	31.2492650723835	26.6070981892506	24.5320891030781	35.9820585481666
ENSMUSG00000034006	1447.69478471724	1264.85607724181	1047.17876584395	1104.73759294056	1288.07388164968	963.541307397601	1495.29672735382	1600.13668914068	1380.22694584859	1424.16828770406	1567.63899459442	1343.31883523317	1186.01373496514	1468.46441331246	-0.308968702595219	0.00246838278004763	0.0412947368701606	Slc66a2	18	80296507	80335940	+	6105	protein_coding	solute carrier family 66 member 2 [Source:MGI Symbol;Acc:MGI:1914193]	-	1360	1177	1131	1237	1397	986	1529	1880	1407	1235	1614	1177	15.0716001294859	13.0610106216095	10.7484572086165	11.2715041829797	13.3486561110063	10.0170856431055	15.5015434803813	16.7136894270501	14.3999910090745	14.6497040465142	16.4129439295256
ENSMUSG00000019188	2471.72594861282	2609.23581609441	2376.75322008967	2173.75206242306	2008.17817769006	2523.18829178561	2620.9255914377	3138.14041109665	2869.34173177479	2691.50508785528	2818.64210800062	2667.23544429899	2360.4722527826	2800.96506241067	-0.247420800715726	0.00247459097349277	0.0412947368701606	H13	2	152511381	152550590	+	8884	protein_coding	histocompatibility 13 [Source:MGI Symbol;Acc:MGI:95886]	-	2322	2428	2567	2434	2178	2582	2680	3687	2925	2334	2902	2337	17.6831564206279	18.515102497658	16.7643420732368	15.2408738782737	14.3013202718001	18.025936144256	18.6715069146369	22.5249966268275	20.5717440526128	19.0256657957684	20.2795111553221
ENSMUSG00000026921	332.118215317485	400.842240281389	360.170238650129	409.922841681258	464.702388225798	411.410639365507	522.229203667065	550.685339294692	467.923420874043	452.043699416996	506.034644475646	478.207809653949	396.527760586928	496.187352897065	-0.323777506570274	0.00252914234509796	0.0419769274087745	Egfl7	2	26470026	26483132	+	3581	protein_coding	EGF-like domain 7 [Source:MGI Symbol;Acc:MGI:2449923]	-	312	373	389	459	504	421	534	647	477	392	521	419	5.89462791009733	7.0565187342138	6.30252352579891	7.13027384582395	8.2101864991099	7.29168527079134	9.2297526338662	9.80618554888316	8.32276917119053	7.9273732680365	9.03237637257384
ENSMUSG00000022150	212.896291870182	220.302035543391	253.693175810116	240.238005255465	283.984792804654	192.512816995261	377.491521751848	539.620564316592	358.054609264205	212.183777277366	317.607156897382	267.065936656382	233.937853046512	345.337261027296	-0.56369073001124	0.00254533945221086	0.0420544558851453	Dab2	15	6329269	6470193	+	7342	protein_coding	disabled 2, mitogen-responsive phosphoprotein [Source:MGI Symbol;Acc:MGI:109175]	-	200	205	274	269	308	197	386	634	365	184	327	234	1.84298473709903	1.89158329044471	2.16523669095885	2.03814813113614	2.44716438441265	1.66418646762636	3.25406369954092	4.68678492770082	3.10622046065118	1.8148929126671	2.76504367933111
ENSMUSG00000042726	1214.57334511939	1424.9780445392	1249.94812899145	1173.50460559733	1187.57276991037	1268.43470284187	1589.18062913667	1753.34126576053	1327.25448310814	1316.92322636278	1772.57816922851	1436.90604380506	1253.16859949994	1532.69730290028	-0.291401545665724	0.00255557424048694	0.0420544558851453	Trafd1	5	121509788	121523695	-	4486	protein_coding	TRAF type zinc finger domain containing 1 [Source:MGI Symbol;Acc:MGI:1923551]	-	1141	1326	1350	1314	1288	1298	1625	2060	1353	1142	1825	1259	17.2080832426329	20.0248947853574	17.4599780906184	16.2942337106149	16.7487885923166	17.9459132244658	22.4205995412889	24.9234465075044	18.8448341273017	18.4354777416258	25.2564451388072
ENSMUSG00000021180	20.2251477276673	18.2689492889641	27.7766250886989	33.0438891987071	32.2709991823471	42.0205641157169	53.7876520630872	17.0227307355392	65.7250926594568	81.8752618842009	79.6446081516372	66.1958304532913	28.9343624336836	60.7085293245354	-1.06180081380348	0.00256594605703132	0.0421322853909875	Rps6ka5	12	100514698	100693242	-	11932	protein_coding	ribosomal protein S6 kinase, polypeptide 5 [Source:MGI Symbol;Acc:MGI:1920336]	-	19	17	30	37	35	43	55	20	67	71	82	58	0.107732435826283	0.0965209671118315	0.145873769349488	0.172498897848545	0.171112448861328	0.223514319276427	0.285300524759392	0.0909739177610545	0.350845046974123	0.430916045681384	0.426647525806076
ENSMUSG00000059027	196.929069979919	186.988069192927	188.881050603152	172.364070685148	177.029481228876	150.492252879544	235.687711767346	204.27276882647	250.147740718828	266.382894299301	244.761478709909	208.85925815435	178.780665761594	235.018642079367	-0.394375780948893	0.00257827656097764	0.042168197176918	9630013D21Rik	4	109508726	109515050	-	3142	lncRNA	RIKEN cDNA 9630013D21 gene [Source:MGI Symbol;Acc:MGI:2442649]	-	185	174	204	193	192	154	241	240	255	231	252	183	3.98356282441041	3.75170822718083	3.76697885040452	3.41703143016038	3.56469071605135	3.03993767909178	4.74748922287138	4.14577003204928	5.07093205500008	5.32418773985904	4.97923912854699
ENSMUSG00000029189	229.927995219797	154.748746918284	149.993775478974	113.420916979346	194.54802364215	112.38057844901	261.114601833532	288.535285967389	463.01856321289	174.129078091751	232.134894490747	158.641731603577	159.170006114594	262.929025866648	-0.726478413082869	0.00257843316071205	0.042168197176918	Sel1l3	5	53264425	53371269	-	9850	protein_coding	sel-1 suppressor of lin-12-like 3 (C. elegans) [Source:MGI Symbol;Acc:MGI:1916941]	-	216	144	162	127	211	115	267	339	472	151	239	139	1.48362329492016	0.990403689813591	0.954218822917938	0.717241376977259	1.24960579869651	0.724122013043861	1.6777535117703	1.86794297817128	2.99405352440905	1.110166910442	1.50636526980615
ENSMUSG00000069565	998.483608871156	1090.76373695874	1038.84577831734	912.725804353477	996.712860460492	800.345163041212	1162.79124187292	1445.22983944728	1185.01361093468	1074.75695881796	1368.52747421533	1036.30713882049	972.979492000403	1212.10437735144	-0.318107253519048	0.00258759702798383	0.0422261992883036	Dazap1	10	80097320	80124242	+	2944	protein_coding	DAZ associated protein 1 [Source:MGI Symbol;Acc:MGI:1917498]	-	938	1015	1122	1022	1081	819	1189	1698	1208	932	1409	908	21.5561479543388	23.356847471868	22.1118075794295	19.3112744180529	21.4197646810778	17.254255959141	24.9975343950046	31.304013856299	25.6379278137079	22.9258617172645	29.7126790064397
ENSMUSG00000031955	829.231056834361	764.071937909029	693.489739714515	613.54464539221	813.229179395147	707.509033018117	944.706761689858	1184.78205919353	1031.00108037446	901.781053428804	903.286409524665	703.045371710818	736.845932043896	944.767122653689	-0.360012093244069	0.00263362830342743	0.0428221294613555	Bcar1	8	112437106	112470441	-	4547	protein_coding	breast cancer anti-estrogen resistance 1 [Source:MGI Symbol;Acc:MGI:108091]	-	779	711	749	687	882	724	966	1392	1051	782	930	616	11.5909391676814	10.5932844626738	9.55709842454871	8.40484343910455	11.3154137328562	9.87560593955115	13.1493806591378	16.6155387631522	14.4421400976878	12.4545878602173	12.6977454941179
ENSMUSG00000024308	2399.34120937696	2503.92069666391	2067.50679410215	2295.21068218047	2267.2681996969	2121.54987663306	3260.50967233332	2900.67331733588	2495.5915779949	2255.6058062746	3025.52383405305	2654.6810626613	2275.79957644224	2765.43087844217	-0.281602693124413	0.00263683458746901	0.0428221294613555	Tapbp	17	34134873	34148266	+	3628	protein_coding	TAP binding protein [Source:MGI Symbol;Acc:MGI:1201689]	-	2254	2330	2233	2570	2459	2171	3334	3408	2544	1956	3115	2326	42.0332292451304	43.5085520853753	35.7100649288476	39.4061213255841	39.538305923776	37.114420616544	56.8789332565124	50.9838296741795	43.8130634355506	39.0435351911947	53.3039504252658
ENSMUSG00000024863	10508.5609667122	11321.3753387787	10099.5808822509	9211.20738366122	9720.02495372295	8820.40957461537	11373.6435180673	11234.1511489191	13430.4812477705	10491.5652482037	11595.0894160274	12475.6314256022	9946.85984995688	11766.7603340984	-0.242475015611019	0.00264042662964802	0.0428221294613555	Mbl2	19	30210342	30217087	+	1089	protein_coding	mannose-binding lectin (protein C) 2 [Source:MGI Symbol;Acc:MGI:96924]	-	9872	10535	10908	10314	10542	9026	11630	13199	13691	9098	11938	10931	613.314722559775	655.379191479402	581.147594722933	526.862262475239	564.705398008988	514.064471624377	661.005328799064	657.829425343525	785.526937336463	605.014265042556	680.569243676076
ENSMUSG00000091337	84.0940352887221	80.5983056866065	66.6639002128773	68.7670126567688	79.2944551337672	79.1550161249551	139.847895364027	108.945476707451	123.602413061068	100.326025125711	116.553085099957	83.3154417774183	76.4287875172828	112.098389522605	-0.556720241079935	0.00266024324377165	0.042990930947373	Eid1	2	125515015	125516705	+	1691	protein_coding	EP300 interacting inhibitor of differentiation 1 [Source:MGI Symbol;Acc:MGI:1889651]	-	79	75	72	77	86	81	143	128	126	87	120	73	3.1607460710902	3.00471748246349	2.47034769846683	2.53305700102163	2.9667547794872	2.97092406400661	5.23414266097904	4.10834123893517	4.65565434797391	3.72583147204433	4.40561216014605
ENSMUSG00000101122	39.3858139959838	25.7914578197141	49.997925159658	27.6854206799978	32.2709991823471	49.8383434860828	95.839816403319	51.0681922066175	74.5538364495331	43.8205626985864	68.9605753508078	67.3371378748997	37.4949933872973	66.9300201639606	-0.836202207170033	0.00269144276297094	0.0433241153536162	Gm17971	1	55105423	55106228	+	806	processed_pseudogene	predicted gene, 17971 [Source:MGI Symbol;Acc:MGI:5010156]	-	37	24	54	31	35	51	98	60	76	38	71	59	3.10579513506142	2.01726144430601	3.88711968806521	2.13956013422956	2.53314359778334	3.9245085041815	7.52565247958601	4.04032550890162	5.89158763819189	3.41425627806715	5.46879861000098
ENSMUSG00000045917	83.0295538293712	89.1954582931778	135.179575431668	104.490136114831	86.6706835183036	197.39892910174	231.775882526394	183.845491943823	145.183786770143	170.669559983968	191.341314705762	168.913498398054	115.994056048182	181.954922388024	-0.649037872603872	0.00270922068901332	0.0435227501260298	Tmem268	4	63477018	63504594	+	3974	protein_coding	transmembrane protein 268 [Source:MGI Symbol;Acc:MGI:1913920]	-	78	83	146	117	94	202	237	216	148	148	197	148	1.32792290803086	1.41493411446468	2.13154344168932	1.63778105896485	1.37983385967688	3.15263466741072	3.69125126576697	2.95002730161775	2.32695317651787	2.69700290637879	3.07756324876903
ENSMUSG00000057842	87.2874796667748	88.1208142173564	70.3674502247038	80.3770277806389	64.5419983646942	65.4739022268147	133.002194192361	125.117070906213	86.3254948363015	96.8665070179278	121.409463645788	110.706819896022	76.0281120801638	112.237925082436	-0.565865069153395	0.00272098162034582	0.0435711815659549	Zfp595	13	67461062	67480634	-	5440	protein_coding	zinc finger protein 595 [Source:MGI Symbol;Acc:MGI:3040707]	zf-C2H2	82	82	76	90	70	67	136	147	88	84	125	97	1.01981424913791	1.02117680282685	0.810557610335385	0.920325498914921	0.750630051401975	0.763881589687174	1.54736630064957	1.46662330559339	1.01073560371922	1.11822178333136	1.42652614943455
ENSMUSG00000106659	0	3.22393222746426	2.77766250886989	1.78615617290309	1.84405709613412	0	11.7354877228554	6.80909229421567	7.84777225784559	14.9912451337269	25.253168438324	0	1.60530133422856	11.1061276411613	-2.78718529835476	0.00272988759221548	1	Gm42161	5	113293194	113302234	+	726	lncRNA	predicted gene, 42161 [Source:MGI Symbol;Acc:MGI:5625046]	-	0	3	3	2	2	0	12	8	8	13	26	0	0	0.279943650845497	0.239747357558966	0.153246731377324	0.160701593058904	0	1.02305209960302	0.598072058801599	0.688505094444347	1.29674413808857	2.22333728458427
ENSMUSG00000045312	73.4492206952129	77.3743734591422	79.6263252542701	74.1254811754781	70.9961982011636	149.515030458248	183.855974324734	171.078443892169	137.336014512298	111.857752151655	153.461562048277	92.4459011502861	87.5144382072526	141.672608013236	-0.697749888040332	0.00273301507851484	0.0437068895759366	Lhfpl2	13	94194304	94331917	+	8415	protein_coding	lipoma HMGIC fusion partner-like 2 [Source:MGI Symbol;Acc:MGI:2145236]	-	69	72	86	83	77	153	188	201	140	97	158	81	0.554754831755731	0.57964802998597	0.592943791505311	0.548683395088222	0.533781369885849	1.12768408355447	1.3827919882216	1.29640913922582	1.03950769161205	0.834766814685073	1.16565918570361
ENSMUSG00000015839	1409.37345218061	1301.39397581974	1395.31246695564	1277.99474171216	1380.27673645639	1382.76972613347	1607.76181803119	1762.70376766508	1825.58802148133	1395.3389701392	1598.71981728774	1467.72134418849	1357.853516543	1609.63895646551	-0.246202101276146	0.00274339693935252	0.0438158663317654	Nfe2l2	2	75505857	75534985	-	3796	protein_coding	nuclear factor, erythroid derived 2, like 2 [Source:MGI Symbol;Acc:MGI:108420]	TF_bZIP	1324	1211	1507	1431	1497	1415	1644	2071	1861	1210	1646	1286	23.5976037622105	21.6124463129829	23.0333042196021	20.9706202197431	23.0050087949768	23.1196032146014	26.8057976635184	29.6110659813919	30.6319018055992	23.0837694647258	26.9198261502904
ENSMUSG00000037548	5.32240729675456	11.8210848340356	5.55532501773977	6.2515466051608	8.29825693260354	1.95444484259148	27.3828046866626	28.0875057136396	7.84777225784559	5.76586351297189	43.7074069124838	17.1196113241271	6.5338442548143	21.6518274012884	-1.73771712663044	0.00275828099309792	1	H2-DMb2	17	34362281	34370529	+	1747	protein_coding	histocompatibility 2, class II, locus Mb2 [Source:MGI Symbol;Acc:MGI:95923]	-	5	11	6	7	9	2	28	33	8	5	45	15	0.193634715795379	0.426565540097717	0.199263401932237	0.222896362009032	0.300522097609295	0.0710047219181408	0.992015029609343	1.02522970698116	0.286121750753633	0.207264375028027	1.59914642876509
ENSMUSG00000029864	3419.11444743513	3172.34931182483	2658.22302098848	3125.7733025804	2801.12272902773	2767.49389710954	3738.73079703968	4345.05202024637	3248.97771474807	3687.84630289682	3110.02482075051	3631.64021555815	2990.67945149435	3627.04531187327	-0.278588315962412	0.00276574354434777	0.0439096458582075	Gstk1	6	42222869	42227381	+	1469	protein_coding	glutathione S-transferase kappa 1 [Source:MGI Symbol;Acc:MGI:1923513]	-	3212	2952	2871	3500	3038	2832	3823	5105	3312	3198	3202	3182	147.931228504346	136.138369683873	113.391523879873	132.539123359353	120.640403414432	119.56982495197	161.077777192194	188.614074752574	140.871235674997	157.653720957159	135.321921382505
ENSMUSG00000021928	2161.9618439417	2337.35086491159	2137.87424432686	1610.21978987213	1824.69449662471	1616.32588482316	2538.77717737771	2358.49934340895	2597.61261734689	2172.57737168781	2324.26277203497	2412.72388928031	1948.07118741669	2400.74219518944	-0.301876835425781	0.00277071938935929	0.0439096458582075	Ebpl	14	61569191	61597888	-	14296	protein_coding	emopamil binding protein-like [Source:MGI Symbol;Acc:MGI:1915427]	-	2031	2175	2309	1803	1979	1654	2596	2771	2648	1884	2393	2114	9.61172876738089	10.3069628303391	9.37084142152236	7.01582960075638	8.07528877426385	7.17581289038544	11.2394037954289	10.5201548685461	11.5733005893637	9.54363718830088	10.3919436436748
ENSMUSG00000025290	3373.34174468304	3259.39548196636	2656.37124598257	2763.18359948107	2754.09927307631	2775.31167647991	3859.01954619895	3733.93598684052	3368.65624168022	3191.98204078124	3446.08621612206	3289.24798907561	2930.28383694488	3481.48800344977	-0.249192829352536	0.00279641426232209	0.0442027798839638	Rps24	14	24537193	24547027	+	6256	protein_coding	ribosomal protein S24 [Source:MGI Symbol;Acc:MGI:98147]	-	3169	3033	2869	3094	2987	2840	3946	4387	3434	2768	3548	2882	34.2713823490779	32.8444246338687	26.6074346001398	27.5119525955823	27.8525709756236	28.1560508074182	39.0403287874886	38.060197820989	34.2970954858874	32.0418001683354	35.2091462830871
ENSMUSG00000047963	1463.6620066075	1495.90455354342	1274.02120406832	985.065129356052	1334.17530905304	1191.23413155951	1681.10861629903	1509.06507970555	1619.58399971288	1547.55776688166	1456.91356374946	1715.38505467753	1290.67705569797	1588.26901350435	-0.299749511476548	0.00286601780742611	0.0451287573215481	Stbd1	5	92750900	92754438	+	2221	protein_coding	starch binding domain 1 [Source:MGI Symbol;Acc:MGI:1261768]	-	1375	1392	1376	1103	1447	1219	1719	1773	1651	1342	1500	1503	41.8851680936493	42.4596749204941	35.9450482162427	27.6264320258601	38.0055288031125	34.0412334002294	47.9049558003893	43.327170077966	46.4464265721212	43.7574010247149	41.92869294691
ENSMUSG00000054499	580.142395346247	697.444005208101	447.203663928052	571.569975328988	646.342012195009	471.998429485843	1047.39227926484	843.476307945966	1036.88690956785	540.837997516763	884.832171050506	512.447032302203	569.116746915373	810.978782941355	-0.512064058149402	0.00288838029941127	0.0453774356161828	Dedd2	7	24899340	24920040	-	5981	protein_coding	death effector domain-containing DNA binding protein 2 [Source:MGI Symbol;Acc:MGI:1914629]	-	545	649	483	640	701	483	1071	991	1057	469	911	449	6.16493955624536	7.35117704639559	4.68535523083719	5.95256322246779	6.83708568375653	5.00868210660835	11.0832924794897	8.99290486243419	11.0421839237772	5.67866961473295	9.45612486529168
ENSMUSG00000091086	352.343363045152	306.273561609104	248.137850792377	241.131083341917	281.218707160453	279.485612490582	319.792040447809	433.228497219472	336.47323555513	312.509802403077	435.131517706506	434.838127632827	284.765029739931	378.662203494137	-0.413195774382564	0.00289089046514217	0.0453774356161828	Rpl6l	10	110961712	110962582	+	871	processed_pseudogene	ribosomal protein L6-like [Source:MGI Symbol;Acc:MGI:3647789]	-	331	285	268	270	305	286	327	509	343	271	448	381	25.7108220095726	22.1672946025418	17.8519570859291	17.2442160072233	20.4271835539799	20.3656379268793	23.2371426090659	31.7175603009745	24.6053618840905	22.5319457910778	31.9321736790808
ENSMUSG00000011256	17.0317033496146	25.7914578197141	12.9624250413928	9.82385895096698	32.2709991823471	16.6127811620276	45.9639935811836	81.709107530588	41.2008043536893	21.9102813492932	53.4201640041469	20.5435335889525	19.0822042510105	44.1246474013089	-1.21833715995779	0.0028949568220402	0.0453774356161828	Adam19	11	45946819	46038170	+	7115	protein_coding	a disintegrin and metallopeptidase domain 19 (meltrin beta) [Source:MGI Symbol;Acc:MGI:105377]	-	16	24	14	11	35	17	47	96	42	19	55	18	0.152142728767743	0.228519005496928	0.114162199214304	0.0860034010386021	0.286959063923172	0.148191794535971	0.408861369672691	0.732312547614832	0.368831646869238	0.193386546740838	0.479906253167467
ENSMUSG00000018166	2816.61794144251	2658.66944358219	2739.70112124867	2462.21628434691	3393.98708543485	2654.13609623923	3652.67055373874	3888.84283653392	3339.2270957133	3175.83762294492	4507.69056624083	2625.00706969948	2787.55466204906	3531.54595747853	-0.341545071861476	0.00290338878308657	0.0453774356161828	Erbb3	10	128403392	128425521	-	6016	protein_coding	erb-b2 receptor tyrosine kinase 3 [Source:MGI Symbol;Acc:MGI:95411]	-	2646	2474	2959	2757	3681	2716	3735	4569	3404	2754	4641	2300	29.7569308216928	27.8597911087775	28.5368697317335	25.4933426765032	35.6931434092564	28.000905651823	38.4269490221154	41.2205210650439	35.3537523670357	33.151537140329	47.8930355795478
ENSMUSG00000029713	2427.01772732008	2534.01073078691	2211.94524456339	2367.55000718304	2130.80797458298	2132.29932326731	2602.34440254318	2925.35627690241	2563.27861371882	2674.20749731636	2563.19659648988	2654.6810626613	2300.60516795062	2663.84407493866	-0.211908049670496	0.00293517791535543	0.0456327280460701	Gnb2	5	137526389	137531772	-	3402	protein_coding	guanine nucleotide binding protein (G protein), beta 2 [Source:MGI Symbol;Acc:MGI:95784]	-	2280	2358	2389	2651	2311	2182	2661	3437	2613	2319	2639	2326	45.3426251950337	46.9564741751531	40.7428153452161	43.3484191099079	39.6271139053389	39.780531119157	48.4131890185598	54.8334245146015	47.9908997411271	49.364415737826	48.1585835284333
ENSMUSG00000028687	9.58033313415821	4.29857630328568	5.55532501773977	1.78615617290309	9.2202854806706	8.79500179166168	14.6693596535692	10.2136384413235	17.6574875801526	14.9912451337269	42.7361312033175	19.402226167344	6.53927965006984	19.9450146965723	-1.61283080335626	0.00293565284858071	1	Mutyh	4	116664920	116676637	+	2612	protein_coding	mutY DNA glycosylase [Source:MGI Symbol;Acc:MGI:1917853]	-	9	4	6	2	10	9	15	12	18	13	44	17	0.23311781289822	0.10374634533631	0.133274564768613	0.0425946121668978	0.223333377796256	0.213707358866563	0.355444020057329	0.249349338451356	0.430579277096034	0.360427352317115	1.04579877221639
ENSMUSG00000109702	57.4819988049493	65.5532886251066	55.5532501773977	88.4147305587028	79.2944551337672	83.0639058101381	97.7957310237949	145.54434778886	100.059096287531	101.479197828305	100.04139804413	105.000282787979	71.5602715183436	108.3200089601	-0.598268144752094	0.00295691080484	0.0458545183144506	Gm45674	7	45621836	45623414	+	450	processed_pseudogene	predicted gene 45674 [Source:MGI Symbol;Acc:MGI:5791510]	-	54	61	60	99	86	85	100	171	102	88	103	92	8.11871636386866	9.18339594173605	7.73584807056929	12.2382839677931	11.148405182473	11.7153846458159	13.7543671168851	20.6245149477731	14.1625497927202	14.161775981915	14.2099756809096
ENSMUSG00000074794	1128.35034691197	1695.7883516462	1473.087017204	1055.61829818572	1416.235849831	1405.24584182328	4079.05994100248	3638.6086947215	3338.24612418107	1808.17479766799	4151.2323809768	663.099611954521	1362.38761760036	2946.40359175073	-1.11292852460466	0.00296767462276943	0.045883605749755	Arrdc3	13	81031503	81044161	+	6266	protein_coding	arrestin domain containing 3 [Source:MGI Symbol;Acc:MGI:2145242]	-	1060	1578	1591	1182	1536	1438	4171	4275	3403	1568	4274	581	11.4451528695882	17.0609258873723	14.731568321428	10.4936102848935	14.2997232426854	14.2337271254905	41.2005415895906	37.0293318165413	33.9332416857271	18.1218791400183	42.346034891793
ENSMUSG00000029195	408.76088039075	373.976138385854	403.68695128909	380.451264828357	473.922673706469	410.433416944212	576.016855730152	724.317192797192	485.580908454196	424.367554554731	605.104766810609	427.990283103176	408.538554257455	540.562926908343	-0.405694255884036	0.00298285874075694	0.0459091115964621	Klb	5	65505657	65541350	+	4549	protein_coding	klotho beta [Source:MGI Symbol;Acc:MGI:1932466]	-	384	348	436	426	514	420	589	851	495	368	623	375	5.71112164528022	5.18261914697832	5.56083165327799	5.20944560270974	6.59134417149184	5.72642390198028	8.01405804425235	10.1534531710584	6.79896888850475	5.85840570006676	8.50238435448953
ENSMUSG00000100975	75.5781836139148	60.1800682459995	18.5177500591326	41.9746700632225	59.0098270762918	44.9522313796041	89.9720725418913	94.4761555822424	105.944925480915	54.1991170219358	101.983949462462	91.3045937286776	50.0354550730275	89.6468023030208	-0.846981760414329	0.00299980392131289	0.0459774323145768	Gm28875	12	104891760	104892948	-	1189	lncRNA	predicted gene 28875 [Source:MGI Symbol;Acc:MGI:5579581]	-	71	56	20	47	64	46	92	111	108	47	105	80	4.04001164728536	3.19074546363177	0.975927006379641	2.19894237512912	3.13996586202225	2.39952963111254	4.78915726357479	5.06688760834584	5.67538976505387	2.86261910330972	5.48246752939958
ENSMUSG00000028837	1038.93390432649	1033.80760094021	926.813390459586	815.380292930259	752.375295222721	848.229061684704	1224.40255241791	1263.08662057701	1143.81280658099	1025.1705326064	1091.71389710293	962.12215641594	902.589924260661	1118.3847609502	-0.310730845731436	0.00300227167532084	0.0459774323145768	Psmb2	4	126571423	126603507	+	1204	protein_coding	proteasome (prosome, macropain) subunit, beta type 2 [Source:MGI Symbol;Acc:MGI:1347045]	-	976	962	1001	913	816	868	1252	1484	1166	889	1124	843	54.8440418821693	54.1295695111587	48.2366107888696	42.1834538756987	39.5357952465048	44.7139851734971	64.3622129040952	66.8971415074649	60.5098191994031	53.4715577012713	57.9573404138637
ENSMUSG00000043866	1219.89575241615	1155.24238150803	1030.51279079073	1015.4297842954	1048.34645915225	996.766869721657	1226.35846703839	1298.83435512164	1257.60550431976	1322.68908987575	1243.23290773287	1220.05763369945	1077.69900631403	1261.46299296464	-0.227862868372137	0.00301055402126139	0.0460083436246068	Taf10	7	105388600	105393568	-	4584	protein_coding	TATA-box binding protein associated factor 10 [Source:MGI Symbol;Acc:MGI:1346320]	-	1146	1075	1113	1137	1137	1020	1254	1526	1282	1147	1280	1069	16.9139924247264	15.8872907433368	14.0870400892402	13.7979224886767	14.4691381336811	13.8008457869559	16.9319139704587	18.0679995696139	17.47419621407	18.1203411893777	17.3354046836695
ENSMUSG00000079435	1119.83449523716	1008.01614312049	1046.25287834099	902.008867316059	948.767375961005	824.775723573606	1061.08368160817	1179.67523997286	1167.35612335453	1147.40683908141	1224.77866925871	1239.4598598668	974.942580591552	1169.96006885708	-0.263416950819018	0.00301552814018959	0.0460083436246068	Rpl36a	X	133486403	133488811	+	1655	protein_coding	ribosomal protein L36A [Source:MGI Symbol;Acc:MGI:1201789]	-	1052	938	1130	1010	1029	844	1085	1386	1190	995	1261	1086	43.0054864793043	38.396428379048	39.6140860411328	33.9485493201621	36.2697183991016	31.6296647483979	40.5774606937713	45.4532957824989	44.9265174693542	43.5384179888935	47.3026762099677
ENSMUSG00000051339	2055.51369800661	2172.93032131091	2064.72913159328	2337.18535224369	2287.55282775438	2359.01492500792	3277.13494660737	3101.54154001524	2713.36725815011	2419.35633004301	3133.33543777051	1982.45099133391	2212.8210426528	2771.19775065336	-0.324978129928977	0.00304871537323943	0.0463022172178495	2900026A02Rik	5	113234189	113369102	-	10814	protein_coding	RIKEN cDNA 2900026A02 gene [Source:MGI Symbol;Acc:MGI:1920194]	-	1931	2022	2230	2617	2481	2414	3351	3644	2766	2098	3226	1737	12.0809762796917	12.6672042728243	11.9643109839348	13.4621740940677	13.3834230454622	13.8452576080569	19.1796725484621	18.2890922268612	15.9815759228223	14.0496880144068	18.5202404793287
ENSMUSG00000023004	388.535732663083	321.318578670604	276.840363384032	350.979687975456	325.476077467672	378.185077041452	743.247555780841	691.974004399667	412.008043536893	328.654220239398	346.745428172372	467.936042859473	340.222586200383	498.427549164774	-0.55227261240384	0.00304986921749228	0.0463022172178495	Tuba1b	15	98829306	98832446	-	1875	protein_coding	tubulin, alpha 1B [Source:MGI Symbol;Acc:MGI:107804]	-	365	299	299	393	353	387	760	813	420	285	357	410	13.1703621013869	10.8032867668685	9.25207429240087	11.6597469074974	10.9824754309199	12.8014697165104	25.0879656211984	23.5336570561959	13.9959315598647	11.0075622404885	11.8204923916537
ENSMUSG00000042745	72.384739235862	105.315119430499	37.0355001182652	139.320181486441	58.0877985282248	168.082256462868	204.393077839731	276.619374452512	178.536818865987	164.903696470996	154.432837757443	99.2937456799369	96.7042658770266	179.696591844434	-0.895574638117676	0.00306837807653705	0.0465257031308989	Id1	2	152578171	152579330	+	1160	protein_coding	inhibitor of DNA binding 1, HLH protein [Source:MGI Symbol;Acc:MGI:96396]	bHLH	68	98	40	156	63	172	209	325	182	143	159	87	3.96603960303929	5.72339967538948	2.00065036307826	7.48108267623715	3.16817649281385	9.19645812967698	11.1517088564055	15.2063687795514	9.80318482102592	8.92741266101323	8.5095728152752
ENSMUSG00000031015	175.639440792901	198.809154026963	173.14096305289	134.854791054183	173.341367036607	179.808925518416	221.996309424014	276.619374452512	241.318996928752	243.319440247414	228.249791654082	179.18526519253	172.59910691366	231.781529649884	-0.428744868717243	0.00307333488463686	0.04654340203836	Swap70	7	109820918	109882713	+	8090	protein_coding	SWA-70 protein [Source:MGI Symbol;Acc:MGI:1298390]	-	165	185	187	151	188	184	227	325	246	211	235	157	1.37988071697397	1.54920608755907	1.3411034510474	1.03830816897222	1.35561427895078	1.41065054704218	1.73672262174266	2.18039404008401	1.89994214844534	1.88878052236604	1.80338297101322
ENSMUSG00000006395	1661.65555804677	1312.14041657795	1244.39280397371	1100.2722025083	1457.72713449402	1104.26133606419	1524.63544666096	1647.80033520019	1539.14433406997	1537.17921255831	1680.30697685771	1870.60286401628	1313.40824194416	1633.2781948939	-0.31471947923025	0.00310726818368582	0.0468010579359401	Hyi	4	118217187	118219941	+	2209	protein_coding	hydroxypyruvate isomerase (putative) [Source:MGI Symbol;Acc:MGI:1915430]	-	1561	1221	1344	1232	1581	1130	1559	1936	1569	1333	1730	1639	47.8094018560396	37.4460433857533	35.299840901466	31.025074793862	41.7506230698434	31.7272819343189	43.6821016335479	47.5674405409554	44.3793584229849	43.7000561893067	48.6204541333034
ENSMUSG00000038618	399.180547256592	595.352818005066	305.542875975688	372.413562050294	387.251990188165	307.825062708159	414.65389954089	544.727383537254	585.640004741727	560.441933460868	575.96649553562	554.675406901717	394.594476030661	539.350853953013	-0.451934812526837	0.00310940101577325	0.0468010579359401	Rassf7	7	140795773	140798571	+	2154	protein_coding	Ras association (RalGDS/AF-6) domain family (N-terminal) member 7 [Source:MGI Symbol;Acc:MGI:1914235]	-	375	554	330	417	420	315	424	640	597	486	593	486	11.7785462567732	17.42408792087	8.88868336799396	10.7693180015399	11.3744498039742	9.07016097844996	12.1835341035361	16.1262883821712	17.3173894524291	16.3394762769309	17.0913992051398
ENSMUSG00000050002	649.333690204056	814.580209472636	694.415627217472	740.361733668329	697.975610886764	701.645698490343	918.301914313434	886.033134784814	868.159806024168	838.356554786113	759.537604568052	851.415336519919	716.385428323267	853.634058499417	-0.253251286703222	0.00318392025217616	0.0475897016116271	Idnk	13	58305463	58312507	+	3377	protein_coding	idnK gluconokinase homolog (E. coli) [Source:MGI Symbol;Acc:MGI:1922981]	-	610	758	750	829	757	718	939	1041	885	727	782	746	12.2209480356329	15.2063202654707	12.8854442987718	13.6559310432881	13.0765032449657	13.1869246252787	17.2102689524424	16.7309197361656	16.3744228690938	15.5901721958822	14.376206957149
ENSMUSG00000062480	2458.95217110061	2845.65751277512	2650.81592096483	2504.19095441013	2377.91162546495	2032.62263629514	3002.3289424305	3084.5188092797	2669.22353919973	2963.65384566755	3475.22448739705	2730.00735248746	2478.35847016846	2987.49282941033	-0.269782917257417	0.00319416415300957	0.0476679515519606	Acat3	17	13142700	13159487	-	2427	protein_coding	acetyl-Coenzyme A acetyltransferase 3 [Source:MGI Symbol;Acc:MGI:109182]	-	2310	2648	2863	2804	2579	2080	3070	3624	2721	2570	3578	2392	64.3944334587852	73.9152742316472	68.4416966194063	64.2696712096711	61.9881068335827	53.1549481494156	78.2927819199701	81.0435692437381	70.0507125463385	76.6850859791583	91.5248832664584
ENSMUSG00000045282	2115.12465973026	2074.06306633534	1779.55578068264	1808.48312506438	1681.78007167432	1463.87918710102	2117.27757666516	2280.19478202547	2274.87298324299	2194.4876530371	2290.26812221415	2016.69021398217	1820.48098176466	2195.63188852784	-0.270845332303119	0.00321550983209169	0.0478424928882566	Tmem86b	7	4631039	4634421	-	1917	protein_coding	transmembrane protein 86B [Source:MGI Symbol;Acc:MGI:1915505]	-	1987	1930	1922	2025	1824	1498	2165	2679	2319	1903	2358	1767	70.1264537254696	68.2057806801762	58.1701877606971	58.7625670668682	55.5046704138846	48.4662971539139	69.9018892207892	75.8491551287432	75.5844448341117	71.8892970912939	76.3642888362843
ENSMUSG00000031628	296.990327158905	313.796070139854	305.542875975688	271.495738281269	278.452621516252	344.959514717397	442.036704227553	507.277375919067	413.969986601355	242.166267544819	542.943121423966	366.359682336319	301.872857964894	419.125523008847	-0.475642550938754	0.00321754593109428	0.0478424928882566	Casp3	8	47070326	47092724	+	3357	protein_coding	caspase 3 [Source:MGI Symbol;Acc:MGI:107739]	-	279	292	330	304	302	353	452	596	422	210	559	321	5.62288220017713	5.89274296793154	5.70337324237682	5.03755832616933	5.24786203177699	6.52189052195712	8.33374522363547	9.63596170521361	7.8544341225463	4.53018059377613	10.3378229595102
ENSMUSG00000099338	25.5475550244219	24.7168137438926	46.2943751478315	29.4715768529009	37.8031704707495	21.4988932685063	71.3908836473703	67.2397864053797	59.8392634660726	28.8293175648595	53.4201640041469	60.4892933452489	30.8887307513838	56.8681180721796	-0.88002749230892	0.00322161652685872	0.0478450957471328	2810030D12Rik	8	13250720	13271158	+	3023	lncRNA	RIKEN cDNA 2810030D12 gene [Source:MGI Symbol;Acc:MGI:1925585]	-	24	23	50	33	41	22	73	79	61	25	55	53	0.537129762743544	0.515437102416816	0.959623892313425	0.607258549510077	0.791174928711764	0.451372061230867	1.49464425997246	1.41836854368619	1.26079790822702	0.598893256986377	1.12951802556617
ENSMUSG00000032715	159.672218902637	136.47979762932	107.402950342969	70.5531688296719	113.409511412248	60.587790120336	237.643626387822	286.833012893835	189.327505720525	73.8030529660402	319.549708315715	102.717667944762	108.017572872864	201.64576237145	-0.904282202620071	0.00323428057441676	0.0479751618538486	Trib3	2	152179342	152185952	-	2125	protein_coding	tribbles pseudokinase 3 [Source:MGI Symbol;Acc:MGI:1345675]	-	150	127	116	79	123	62	243	337	193	64	329	90	4.77571550815804	4.048841489452	3.16714721006837	2.0680736544506	3.37654843693505	1.80960128231565	7.07783550226534	8.60738270885393	5.674820989609	2.18106496405964	9.61181907279801
ENSMUSG00000035509	144.769478471724	219.22739146757	191.658713112022	112.527838892894	135.538196565858	104.562799078644	247.423199490201	229.806864929779	211.889850961831	227.175022411093	200.082796088259	199.728798781482	151.380736264785	219.351088777107	-0.537116586986488	0.00324540082968713	0.0480186768742409	Fbxl21	13	56670285	56685711	+	4795	protein_coding	F-box and leucine-rich repeat protein 21 [Source:MGI Symbol;Acc:MGI:2442921]	-	136	204	207	126	147	107	253	270	216	197	206	175	1.91891801440066	2.88222276432544	2.50467239406858	1.46177247126925	1.78836239983653	1.38402937053557	3.26576578990066	3.05615445688971	2.81461456961378	2.97526173285801	2.66714872008731
ENSMUSG00000002625	1158.15582777379	1247.66177202867	1166.61825372535	1176.18383985668	1134.09511412248	1123.8057844901	1250.80739979434	2068.26178436801	1376.30305971967	1331.91447149651	1521.9890362636	1281.68823446631	1167.75343199951	1471.82733101807	-0.334737724558216	0.00326694517262414	0.0482267074641462	Akap8l	17	32540398	32569581	-	5073	protein_coding	A kinase (PRKA) anchor protein 8-like [Source:MGI Symbol;Acc:MGI:1860606]	-	1088	1161	1260	1317	1230	1150	1279	2430	1403	1155	1567	1123	14.5100916681272	15.5043422095116	14.4103615743899	14.4417145902402	14.1438309254622	14.0599286979736	15.6048215929888	25.9980969026366	17.2801138894376	16.4878749050238	19.1766507081913
ENSMUSG00000108606	10.6448145935091	1.07464407582142	0.925887502956629	8.03770277806389	3.68811419226824	2.93166726388722	15.6473169638072	20.427276882647	18.6384591123833	23.0634540518876	8.74148138249676	10.2717667944762	4.55047173441775	16.1316258646163	-1.82855395067859	0.00332423242981852	1	Cyp2b27-ps	7	25704030	25728331	-	1279	unprocessed_pseudogene	cytochrome P450, family 2, subfamily b, polypeptide 27, pseudogene [Source:MGI Symbol;Acc:MGI:3643081]	-	10	1	1	9	4	3	16	24	19	20	9	9	0.52897552540192	0.0529682279160361	0.0453626743778496	0.391444152783203	0.182438399625902	0.145479182006636	0.774288062873907	1.01845265369029	0.928189921106853	1.13241864948855	0.436858297271714
ENSMUSG00000054435	112.835034691197	105.315119430499	149.067887976017	108.062448460637	141.992396402327	177.854480675825	275.783961487102	346.412570468222	143.221843705682	157.98466025543	187.456211869097	152.935194495535	132.521227939417	210.632407046845	-0.670485733993831	0.00334767871751583	0.0492365350573672	Gimap4	6	48661483	48668994	+	1837	protein_coding	GTPase, IMAP family member 4 [Source:MGI Symbol;Acc:MGI:1349656]	-	106	98	161	121	154	182	282	407	146	137	193	134	3.90393728257158	3.61412282169396	5.08494096092129	3.66415687658475	4.89033231093023	6.14486536547646	9.50151979930712	12.025008715216	4.96589452849231	5.40081091506075	6.52254038024744
ENSMUSG00000070960	59.6109617236511	110.688339809606	53.7014751714845	62.515466051608	57.1657699801577	83.0639058101381	115.398962608078	173.6318535025	85.3445233040708	88.7942980997671	102.955225171629	128.967738641757	71.1243197577743	115.848766887967	-0.708896229525212	0.00335138766552344	0.0492365350573672	Gm19680	1	31654230	31655742	+	1513	processed_pseudogene	predicted gene, 19680 [Source:MGI Symbol;Acc:MGI:5011865]	-	56	103	58	70	62	85	118	204	87	77	106	113	2.50412049116901	4.61194675543612	2.22412023178958	2.57369427911289	2.39044947348558	3.48441711210651	4.82721013817976	7.31798283185327	3.59280888758211	3.68552497877002	4.34946220124223
ENSMUSG00000071042	104.319183016389	84.8968819898921	96.2923003074894	92.8801209909605	73.7622838453648	95.7677972869827	171.142529291641	175.334126576053	115.754640803222	153.371969445052	106.840328008294	95.8698234151115	91.3197612395132	136.385569589896	-0.581234347707594	0.00335570066026157	0.0492409982190354	Rasgrp3	17	75742891	75836049	+	5840	protein_coding	RAS, guanyl releasing protein 3 [Source:MGI Symbol;Acc:MGI:3028579]	-	98	79	104	104	80	98	175	206	118	133	110	84	1.13532277919396	0.916431972065789	1.03321258476782	0.99064565119122	0.799105181923042	1.04079061821209	1.85471988091558	1.91449625055933	1.26247548011255	1.64924947952524	1.16936061345429
ENSMUSG00000052566	750.459428842393	815.654853548457	803.670352566354	666.236252492851	661.094468964082	595.128454569107	785.299720121073	1067.32521711831	913.284496506781	855.654145325029	976.132087712139	773.806431850543	715.373968497207	895.250349772312	-0.324838213994464	0.00336283991294676	0.0492868732825921	Hook2	8	85717232	85729978	+	3978	protein_coding	hook microtubule tethering protein 2 [Source:MGI Symbol;Acc:MGI:2181664]	-	705	759	868	746	717	609	803	1254	931	742	1005	678	11.990311371978	12.9259652840621	12.6597212014595	10.4321036610147	10.5143198408833	9.49516801876748	12.4940687724646	17.1093261256037	14.6230745464273	13.5078642772791	15.6844721250649
ENSMUSG00000073616	384.277806825679	367.528273930925	344.430151099866	334.904282419329	355.903019553885	283.394502175765	419.54368609208	401.736445358724	462.037591680659	435.899281580675	398.223040758186	446.251201848912	345.073006000908	427.281874553206	-0.30832688993218	0.00337979350910107	0.0494073789751676	Cops9	1	92564867	92569707	-	1499	protein_coding	COP9 signalosome subunit 9 [Source:MGI Symbol;Acc:MGI:1914165]	-	361	342	372	375	386	290	429	472	471	378	410	391	16.2933989735189	15.4564751958484	14.3982762621003	13.9164184848153	15.0214715251684	11.999040115206	17.7136795991639	17.0899390038077	19.6323851755226	18.2615538732166	16.9805146027955
ENSMUSG00000020994	921.84094379789	1095.06231326203	1048.1046533469	1119.02684232378	1083.3835439788	957.677972869827	1126.60682139412	1370.3298242109	1297.82533714121	1248.88603690971	1199.52550082039	1141.30742160847	1037.51604492987	1230.7468236808	-0.246538163827226	0.00338313024899169	0.0494073789751676	Pnn	12	59113670	59120784	+	5762	protein_coding	pinin [Source:MGI Symbol;Acc:MGI:1100514]	-	866	1019	1132	1253	1175	980	1152	1610	1323	1083	1235	1000	10.1683564316647	11.980830338632	11.3983599651394	12.0969437787106	11.8957388024035	10.5487976576859	12.3746336573989	15.1653615639283	14.3463156500262	13.6113989870671	13.3064537068532
ENSMUSG00000060601	1243.31434452187	924.193905206421	1010.14326572568	1116.34760806443	1050.19051624838	962.564084976306	1493.34081273335	1200.10251685551	1201.69012698261	1256.95824582787	1178.15743521873	1310.22092000652	1051.12562079051	1273.41167627077	-0.276630949395943	0.00339208606044436	0.0494793360978356	Nr1h2	7	44199040	44203375	-	3354	protein_coding	nuclear receptor subfamily 1, group H, member 2 [Source:MGI Symbol;Acc:MGI:1352463]	THR-like	1168	860	1091	1250	1139	985	1527	1410	1225	1090	1213	1148	23.5605762099945	17.3708624370795	18.8725631596402	20.7321718433097	19.810136720738	18.214754092595	28.1792288740834	22.8168770018204	22.8205875724538	23.5348265271091	22.4525858862176
ENSMUSG00000038745	5828.03598994624	7332.29652932954	7080.26173510934	6005.95013138663	6468.95229323849	6335.33295726029	7637.84659295838	8790.53815183243	6373.37204490285	8646.48892405265	7363.24115118977	7993.71718094572	6508.47160604509	7800.8673409803	-0.261315559751547	0.0034001899241747	0.0495387101408229	Nlrp6	7	140500815	140509105	+	5081	protein_coding	NLR family, pyrin domain containing 6 [Source:MGI Symbol;Acc:MGI:2141990]	-	5475	6823	7647	6725	7016	6483	7810	10328	6497	7498	7581	7004	72.9022700455634	90.9729262334099	87.3194698813866	73.6276499645815	80.5503056121158	79.1365233718953	95.1382075030361	110.323284051317	79.8946067847662	106.867045545301	92.6287760352943
ENSMUSG00000002032	1709.55722371756	1994.53940472455	1712.89188046976	1901.36324605534	2057.04569073761	1448.24362836029	2006.76840060827	2885.35285967389	2234.65315042153	2096.46797331658	2550.57001227072	1863.75501948663	1803.94017901085	2272.9279026296	-0.333813423988433	0.00343536708892563	0.0499327557232954	Tmem25	9	44705066	44710604	-	3212	protein_coding	transmembrane protein 25 [Source:MGI Symbol;Acc:MGI:1918937]	-	1606	1856	1850	2129	2231	1482	2052	3390	2278	1818	2626	1633	33.8279848494528	39.146092983984	33.4168405912668	36.8721082410159	40.5182650197797	28.6169145860912	39.541664370273	57.2828092621018	44.3130838782186	40.9888660803403	50.756049106297
ENSMUSG00000025823	2174.73562145391	2195.49784690316	2249.90663218461	1834.38238957147	2264.5021140527	1911.44705605447	2605.2782744739	2223.16863406142	2621.15593412043	2546.20532732839	2664.20927024318	2265.49523189281	2105.07861003672	2487.58544535335	-0.240962106693641	0.0034456113553284	0.0499871843864248	Pdia4	6	47773075	47790364	-	2399	protein_coding	protein disulfide isomerase associated 4 [Source:MGI Symbol;Acc:MGI:104864]	-	2043	2043	2430	2054	2456	1956	2664	2612	2672	2208	2743	1985	57.6161509357499	57.6931307377735	58.7685831955504	47.6286241802398	59.7207044004245	50.5695096743602	68.7317019579902	59.09395695968	69.5921089292385	66.6524906951322	70.9846071855618
ENSMUSG00000120333	0	4.29857630328568	0.925887502956629	0	7.37622838453648	0	16.6252742740451	15.3204576619853	5.88582919338419	10.3785543233494	7.77020567333046	15.9783039025186	2.1001153651298	11.9931041714355	-2.51271712582141	0.00345592732342891	1	ENSMUSG00000120333	16	91130921	91164032	-	1042	lncRNA	novel transcript	-	0	4	1	0	8	0	17	18	6	9	8	14	0	0.260062815756661	0.0556802884158058	0	0.447867011749574	0	1.00979758583657	0.937572656480242	0.359780253286897	0.625492853851376	0.476640445477093
ENSMUSG00000027566	1678.68726139639	1802.17811515252	1537.89914241096	1536.09430869665	1472.4795912631	1301.66026516593	1923.64202923805	1915.05720774816	1899.16088639863	1721.68684497341	1732.75586515269	1886.5811679188	1554.83311401426	1846.48066690496	-0.248571935771089	0.00346663207711136	0.0499871843864248	Psma7	2	179678167	179684226	-	3071	protein_coding	proteasome subunit alpha 7 [Source:MGI Symbol;Acc:MGI:1347070]	-	1577	1677	1661	1720	1597	1332	1967	2250	1936	1493	1784	1653	34.7422547102488	36.9946765214039	31.3804387297678	31.1563429510732	30.3355523327158	26.9013793426247	39.6440184093482	39.7651704677797	39.389396630777	35.2068810627631	36.0648107306188
ENSMUSG00000026946	353.407844504503	402.991528433032	321.28296352595	291.143456183203	371.577504871025	291.212281546131	466.485636983502	437.484179903357	374.731125312127	385.159682666522	421.533657778177	534.131873312764	338.602596510641	436.587692659408	-0.367266989935196	0.00347284295145625	0.0499871843864248	Nmi	2	51838499	51863506	-	2001	protein_coding	N-myc (and STAT) interactor [Source:MGI Symbol;Acc:MGI:1928368]	-	332	375	347	326	403	298	477	514	382	334	434	468	11.2252783308529	12.6960951095596	10.0612416809878	9.06292438667153	11.7485633918011	9.2367526883847	14.7544972595671	13.9417142522888	11.9280668948301	12.0877909345431	13.4651521350084
ENSMUSG00000009092	35.1278881585801	27.9407459713569	22.2213000709591	8.03770277806389	12.9083996729388	30.293895060168	33.2505485480903	61.281830647941	35.3149751603052	74.9562256686346	34.9659255299871	50.2175265507727	22.7549886186778	48.3311720176218	-1.09245586814679	0.00347767391660027	0.0499871843864248	Derl3	10	75729247	75731775	+	1993	protein_coding	Der1-like domain family, member 3 [Source:MGI Symbol;Acc:MGI:1917627]	-	33	26	24	9	14	31	34	72	36	65	36	44	1.12024435527541	0.883796011600535	0.698671677221512	0.251207762874921	0.409776967348394	0.964727226523018	1.05590475107046	1.9607640904213	1.1286232531609	2.36185711051757	1.12140845401008
ENSMUSG00000024620	133.060182418864	142.927662084249	91.6628627927063	110.741682719991	150.290653334931	106.517243921236	147.67155384593	242.573912981433	205.023050236216	161.444178363213	184.542384741598	132.391660906583	122.533381211996	178.941123512496	-0.550321302204193	0.00348525255250847	0.0499871843864248	Pdgfrb	18	61178222	61218133	+	5478	protein_coding	platelet derived growth factor receptor, beta polypeptide [Source:MGI Symbol;Acc:MGI:97531]	-	125	133	99	124	163	109	151	285	209	140	190	116	1.54381091864972	1.64480948267856	1.04853362402295	1.2592080819197	1.73577082141334	1.23411209947226	1.70611399341428	2.82372877160092	2.38384519898728	1.85077476613198	2.15327846375399
ENSMUSG00000027165	221.41214354499	258.989222272962	242.582525774637	217.911053094177	194.54802364215	191.535594573965	253.290943351629	324.283020512021	256.033569912212	320.582011321237	289.440161331559	277.337703450858	221.163093817147	286.827901646586	-0.376030811351795	0.00348683086183089	0.0499871843864248	Iftap	2	101391126	101479877	-	4289	protein_coding	intraflagellar transport associated protein [Source:MGI Symbol;Acc:MGI:1915420]	-	208	241	262	244	211	196	259	381	261	278	298	243	3.28105425445846	3.80668538228283	3.54416914401228	3.16469328317844	2.86981047264178	2.83432837974288	3.73763461756343	4.82135462511294	3.80222885071933	4.69392678770631	4.31349045720929
ENSMUSG00000024645	341.698548451643	365.378985779283	424.982363857093	423.319012978032	378.953733255562	350.822849245171	426.389387263746	515.788741286837	437.513303374892	498.170607520772	529.345261495637	434.838127632827	380.859248927797	473.674238095785	-0.31411315114303	0.00348795123100196	0.0499871843864248	Timm21	18	84964316	84969649	-	3722	protein_coding	translocase of inner mitochondrial membrane 21 [Source:MGI Symbol;Acc:MGI:1920595]	-	321	340	459	474	411	359	436	606	446	432	545	381	5.83491839692334	6.18854475861566	7.15493202120763	7.08434688184983	6.44157785417437	5.9823004378783	7.25042135500498	8.83682800584754	7.48707669131857	8.40533330957292	9.09052064017956
ENSMUSG00000030123	451.340138764787	466.395528906496	466.647301490141	554.601491686408	616.837098656863	706.531810596821	1043.48045002389	1252.87298213568	596.430691596265	575.433178594595	722.629127619732	566.088481117801	543.725561683586	792.822485181328	-0.544875992554555	0.00350084909188625	0.0501135530845536	Plxnd1	6	115931772	115971966	-	7301	protein_coding	plexin D1 [Source:MGI Symbol;Acc:MGI:2154244]	-	424	434	504	621	669	723	1067	1472	608	499	744	496	3.9290687785695	4.02710885645813	4.00513706434076	4.73158990922757	5.34528143673135	6.14194734728716	9.04555454207968	10.9427281061434	5.20325395028918	4.94955049236564	6.32643733863898
ENSMUSG00000024391	2904.96990256864	2896.16578433872	2303.60810735609	2599.75030966044	2969.853953324	3079.22784950288	3932.36634446679	3819.04964051821	2846.77938653349	2855.25561162368	3896.75814517522	3328.0524414103	2792.26265112513	3446.37692828795	-0.303973958267712	0.00351982340893444	0.0502096063978314	Apom	17	35347973	35351026	-	1013	protein_coding	apolipoprotein M [Source:MGI Symbol;Acc:MGI:1930124]	-	2729	2695	2488	2911	3221	3151	4021	4487	2902	2476	4012	2916	182.263713038809	180.233415246717	142.498445209105	159.856612358636	185.484697671383	192.925261698329	245.684497331172	240.406812933595	178.99535232481	177.006313369937	245.878243938644
ENSMUSG00000006058	679.139171065882	663.055394781816	631.455277016421	682.311658048979	625.135355589467	555.062335295981	779.431976259645	838.369488725304	795.567912639097	855.654145325029	663.381309360588	712.175831083685	639.359865299758	774.096777232225	-0.276139188496625	0.00353431304566072	0.0502994586637369	Snf8	11	95925711	95938256	+	2677	protein_coding	SNF8, ESCRT-II complex subunit, homolog (S. cerevisiae) [Source:MGI Symbol;Acc:MGI:1343161]	-	638	617	682	764	678	568	797	985	811	742	683	624	16.1242094388875	15.6143094069273	14.781047023146	15.8760636930654	14.7743413799399	13.1598247180582	18.4273581115833	19.9704571334335	18.9289391360436	20.0725753063191	15.8394813261025
ENSMUSG00000044783	2564.33583557635	2773.65635969508	2867.47359665668	2667.62424423076	2792.82447209512	2779.22056616509	3314.29732439641	3447.10297394668	3275.4639461183	2563.5029178673	3389.75222499041	3308.65021524295	2740.85584573651	3216.46160042701	-0.231125959045067	0.00358657825492914	0.0508015841408753	Hjurp	1	88190193	88205355	-	8331	protein_coding	Holliday junction recognition protein [Source:MGI Symbol;Acc:MGI:2685821]	-	2409	2581	3097	2987	3029	2844	3389	4050	3339	2223	3490	2899	19.5634654908971	20.9882804231664	21.5681684142538	19.9450869216824	21.2094275010536	21.173009764685	25.1783670286948	26.3850569333565	25.0422344033409	19.323682363119	26.0073987398435
ENSMUSG00000043587	140.51155263432	130.031933174392	160.178538011497	150.037118523859	166.887167200138	101.631131814757	196.569419357828	189.803447701262	173.631961204834	185.660805117695	203.967898924924	200.870106203091	141.546240226494	191.750606418272	-0.436298297539415	0.00362074660538732	0.0511149538015713	Pxylp1	9	96705389	96774722	-	6148	protein_coding	2-phosphoxylose phosphatase 1 [Source:MGI Symbol;Acc:MGI:2442444]	-	132	121	173	168	181	104	201	223	177	161	210	176	1.45260052053603	1.33332953546809	1.63260619251198	1.52010388196401	1.71740025516414	1.04917907578588	2.02355645042657	1.96866196681566	1.79884274654944	1.8964420615162	2.12057706325833
ENSMUSG00000108461	0	6.44786445492852	5.55532501773977	10.7169370374185	7.37622838453648	3.90888968518297	9.77957310237949	12.7670480516544	19.619430644614	29.9824902674538	14.5691356374946	22.8261484321694	5.66754076330104	18.2573043559609	-1.6686686581544	0.00367223604843064	1	AV356131	7	116042777	116043561	+	785	lncRNA	expressed sequence AV356131 [Source:MGI Symbol;Acc:MGI:2142184]	-	0	6	6	12	8	4	10	15	20	26	15	20	0	0.517806600035237	0.443456258822443	0.850372945069583	0.594493536615358	0.316038851442018	0.788466904789591	1.03710266247602	1.59189394447961	2.39856367962371	1.18628824248519
ENSMUSG00000036835	951.646424659715	779.116954970529	715.711039785474	777.871013299294	741.310952645916	639.103463527415	946.662676310334	1050.30248638277	930.941984086933	925.997680183286	892.602376723836	876.524099795305	767.459974814724	937.171883913744	-0.289299301190753	0.00369407476031672	0.0520902711896785	Psenen	7	30261288	30263052	-	1275	protein_coding	presenilin enhancer gamma secretase subunit [Source:MGI Symbol;Acc:MGI:1913590]	-	894	725	773	871	804	654	968	1234	949	803	919	768	47.4387740477032	38.5224419928176	35.1753562267651	38.0019441566765	36.7851618332762	31.8139580278073	46.9913907146286	52.5297243458247	46.5060891117353	45.6092491182263	44.7480330694092
ENSMUSG00000058444	358.730251801257	413.737969191246	397.205738768394	423.319012978032	335.61839149641	351.800071666467	535.920606010396	601.75353150131	411.027072004663	407.069964015816	557.51225706146	427.990283103176	380.068572650301	490.212285616137	-0.368808189505153	0.00378503112005592	0.0530682102928388	Map2k5	9	63071050	63285184	-	3240	protein_coding	mitogen-activated protein kinase kinase 5 [Source:MGI Symbol;Acc:MGI:1346345]	-	337	385	429	474	364	360	548	707	419	353	574	375	7.03705610757135	8.05010800903547	7.68212690341256	8.13825280686577	6.55364904137625	6.89140273283288	10.4686016389625	11.8433496329399	8.08021291278564	7.89000461113636	10.9985518350082
ENSMUSG00000017830	223.541106463692	225.675255922498	199.991700638632	182.187929636115	265.544221843313	198.376151523036	351.086674375424	268.959145621519	272.710085960134	244.472612950008	303.038021259888	263.642014391557	215.886061004548	283.984759093088	-0.396944946436951	0.00381694229580907	0.0533329752868339	Dhx58	11	100585710	100595097	-	3272	protein_coding	DEXH (Asp-Glu-X-His) box polypeptide 58 [Source:MGI Symbol;Acc:MGI:1931560]	-	210	210	216	204	288	203	359	316	278	212	312	231	4.34222299412291	4.3480245525575	3.8300959273601	3.46828452076821	5.13459270927568	3.84798068242227	6.79100858109042	5.2417214028892	5.30866466234389	4.69213098978485	5.91983937142363
ENSMUSG00000028234	2665.46157421468	2558.7275445308	2204.53814453973	2172.8589843366	2158.46883102499	2172.36544254043	2866.39287630743	3054.7290304925	2443.60008678667	2506.99745544018	2958.50581012057	2722.0182005362	2322.07008686454	2758.70724328059	-0.249180609055767	0.00386955238605337	0.0538841750629337	Rps20	4	3831334	3835665	-	4080	protein_coding	ribosomal protein S20 [Source:MGI Symbol;Acc:MGI:1914677]	-	2504	2381	2381	2433	2341	2223	2931	3589	2491	2174	3046	2385	41.5221931681518	39.5353165452149	33.8585556176939	33.1726213164445	33.4709514348957	33.7932094303401	44.464025756901	47.7434108278882	38.1476119524936	38.58752630099	46.3487856125613
ENSMUSG00000063882	2352.50402516552	2571.62327344066	2178.61329445695	2344.3299769353	2224.85488648582	1982.78429280906	2715.78745053078	2791.72784062842	2330.78836058014	2701.88364217863	2710.83050428316	2711.74643374173	2275.78495821555	2660.46070532381	-0.225518522354273	0.0038905372594399	0.0540206818138834	Uqcrh	4	115924162	115932268	-	1237	protein_coding	ubiquinol-cytochrome c reductase hinge protein [Source:MGI Symbol;Acc:MGI:1913826]	-	2210	2393	2353	2625	2413	2029	2777	3280	2376	2343	2791	2376	120.872831879209	131.056627216275	110.36247277718	118.047679192536	113.792707106356	101.733148992936	138.950241452025	143.9144131147	120.013618006693	137.167161263799	140.074396688185
ENSMUSG00000054716	578.013432427545	484.66447819546	519.422889158669	564.425350637375	425.055160658915	460.271760430294	564.281368007296	703.889915914545	590.544862402881	658.46161318139	632.300486667266	590.055936971579	505.308845251376	623.255697190826	-0.303221764912383	0.00389097238440656	0.0540206818138834	Zfp771	7	126843446	126853975	+	2009	protein_coding	zinc finger protein 771 [Source:MGI Symbol;Acc:MGI:2442050]	zf-C2H2	543	451	561	632	461	471	577	827	602	571	651	517	18.2863073899979	15.2083673173615	16.2013841497861	17.4998766180488	13.3859067631937	14.5408940689291	17.7766123539035	22.342188915418	18.7227805212227	20.582765840949	20.1172992201233
ENSMUSG00000052962	343.827511370345	473.918037437246	432.389463880746	411.708997854161	410.302703889842	367.435630407199	461.595850432312	566.856933493454	589.56389087065	456.656390227374	482.724027455655	497.610035821293	406.597057473256	509.16785471679	-0.325391353940152	0.00390005526884271	0.0540206818138834	Mrpl35	6	71789981	71803953	-	4171	protein_coding	mitochondrial ribosomal protein L35 [Source:MGI Symbol;Acc:MGI:1913473]	-	323	441	467	461	445	376	472	666	601	396	497	436	5.23924195942136	7.16282577452244	6.49599805014839	6.14834998055035	6.22367102248142	5.59110689232953	7.00414187395443	8.66630932580658	9.00301707739523	6.8754726356696	7.39749742450864
ENSMUSG00000023952	1032.54701557038	932.791057812992	913.850965418193	990.423597874762	996.712860460492	834.547947786563	1245.91761324315	1272.44912248155	1143.81280658099	1095.51406746466	1077.14476146543	981.524382583284	950.145574153898	1136.06045896985	-0.258645792992085	0.00390979299670844	0.0540206818138834	Gtpbp2	17	46471958	46480296	+	5305	protein_coding	GTP binding protein 2 [Source:MGI Symbol;Acc:MGI:1860138]	-	970	868	987	1109	1081	854	1274	1495	1166	950	1109	860	12.3706485594606	11.0846076384546	10.7944609504975	11.6290437154336	11.8868590426188	9.9844149678706	14.8640502697648	15.2952278619579	13.7330485044451	12.968381527437	12.9782095358984
ENSMUSG00000038612	2290.76410052316	2429.77025543223	2122.13415677659	2127.31200192758	2393.58611078209	2468.46383619304	3234.1048249569	2776.40738296644	2680.01422605427	2392.83335788334	3043.97807252721	2399.028200221	2305.33841027245	2754.39434410152	-0.257225564646796	0.00391157177904702	0.0540206818138834	Mcl1	3	95566099	95570487	+	3418	protein_coding	myeloid cell leukemia sequence 1 [Source:MGI Symbol;Acc:MGI:101769]	-	2152	2261	2292	2382	2596	2526	3307	3262	2732	2075	3134	2102	42.5967369198492	44.8140807150157	38.9055670956952	38.7674775404052	44.3056830941696	45.8364978725052	59.8846150526406	51.797887160571	49.9415972968088	43.9636361080148	56.9240193344964
ENSMUSG00000078812	6040.93228181643	6211.4427582478	5639.58078050883	5689.80048878278	5675.08571335275	5559.41835475147	6466.25373529332	6591.20134080077	6323.34249675908	6897.12593421698	6484.23663439426	6250.94074814959	5802.71006291001	6502.18348160233	-0.164307850079229	0.00391742822185787	0.0540206818138834	Eif5a	11	69807540	69812784	-	2377	protein_coding	eukaryotic translation initiation factor 5A [Source:MGI Symbol;Acc:MGI:106248]	-	5675	5780	6091	6371	6155	5689	6612	7744	6446	5981	6676	5477	161.526137165035	164.734531365859	148.671804578789	149.099527974165	151.051722682268	148.442032529986	172.16972620774	176.822004467767	169.439597547343	182.218380533738	174.363577082104
ENSMUSG00000057367	474.758730870507	541.620614213995	405.538726295004	482.262166683833	495.129330312011	422.16008599976	615.13514813967	554.0898854418	541.496285791346	529.30627049082	628.415383830601	579.784170177103	470.244942395852	574.704523978556	-0.290251909506385	0.00397252319965092	0.0545755368435264	Birc2	9	7818228	7837065	-	4580	protein_coding	baculoviral IAP repeat-containing 2 [Source:MGI Symbol;Acc:MGI:1197009]	-	446	504	438	540	537	432	629	651	552	459	647	508	6.5883324204611	7.45505834199204	5.54852858336684	6.55882626300939	6.8396773442282	5.85016895747909	8.50037906645049	7.71463987071956	7.53056205264086	7.25762909156546	8.77015817928695
ENSMUSG00000024331	1043.19183016389	1041.33010947096	1239.76336645893	1077.05217226056	1278.85359616901	1201.98357819376	1312.41871033933	1935.4844846308	1270.35813423875	1334.2208169017	1821.14195468683	1160.70964777581	1147.02910878619	1472.38895809554	-0.360725461891209	0.00398372088420885	0.0546682233517912	Dsc2	18	20163690	20192611	-	5277	protein_coding	desmocollin 2 [Source:MGI Symbol;Acc:MGI:103221]	-	980	969	1339	1206	1387	1230	1342	2274	1295	1157	1875	1017	12.5644969310077	12.4400656122735	14.7218598159356	12.7132930772981	15.3326129950521	14.456666335505	15.740500856333	23.3885615786662	15.3333294164237	15.8779279398247	22.0588466541328
ENSMUSG00000020894	607.818913289371	612.547123218209	627.751727004594	488.513713288994	635.277669618204	544.312888661728	761.828744675362	847.731990629851	556.210858774806	725.345629931864	733.313160420562	765.817279899283	586.03700584685	731.707944055288	-0.320858868184649	0.00400994757433849	0.0548213737151941	Vamp2	11	68979316	68983210	+	3809	protein_coding	vesicle-associated membrane protein 2 [Source:MGI Symbol;Acc:MGI:1313277]	-	571	570	678	547	689	557	779	996	567	629	755	671	10.142178707817	10.1379436066232	10.3273267101194	7.98866480152607	10.5520066514002	9.06973008655585	12.6584231893517	14.1921604565241	9.30091933864728	11.9587898627683	12.3056512490576
ENSMUSG00000087054	0	1.07464407582142	0	0	0.92202854806706	0	12.7134450330933	0	3.9238861289228	1.15317270259438	3.88510283666523	12.5543816376932	0.33277877064808	5.70499805649482	-4.02742269477552	0.00401080958472908	1	Gm12405	4	41642185	41643077	+	660	lncRNA	predicted gene 12405 [Source:MGI Symbol;Acc:MGI:3649392]	-	0	1	0	0	1	0	13	0	4	1	4	11	0	0.102646005310015	0	0	0.088385876182397	0	1.21913708536027	0	0.378677801944391	0.10972450399211	0.376257078929645
ENSMUSG00000068551	657.849541878864	767.295870136493	562.939601797631	695.707829345752	610.382898820394	630.308461735753	848.86694528654	947.314965432755	811.263457154788	879.870772079511	891.63110101467	585.490707285145	654.080700619148	827.406324708901	-0.340345358708799	0.00401205823339692	0.0548213737151941	Zfp467	6	48404631	48422759	-	4255	protein_coding	zinc finger protein 467 [Source:MGI Symbol;Acc:MGI:1916160]	zf-C2H2	618	714	608	779	662	645	868	1113	827	763	918	513	9.82641346038158	11.3680149335586	8.29035656916474	10.1844068058015	9.07580658557295	9.40178445689657	12.6262180866165	14.1969726865431	12.1439434698759	12.9859143878606	13.3940445935307
ENSMUSG00000028536	150.091885768479	213.854171088462	138.883125443494	95.5593552503151	172.41933848854	82.0866833888423	241.555455628773	244.276186054987	211.889850961831	184.507632415101	223.393413108251	179.18526519253	142.149093238022	214.134633893579	-0.594304114605692	0.00402261558793115	0.0548343669822091	2610528J11Rik	4	118384196	118387425	+	1202	protein_coding	RIKEN cDNA 2610528J11 gene [Source:MGI Symbol;Acc:MGI:1913701]	-	141	199	150	107	187	84	247	287	216	160	230	157	7.93634919096978	11.2159120943573	7.24029041546627	4.95196031067108	9.07536176242216	4.33435978870354	12.7187845677353	12.9591816052432	11.2280173554893	9.63969020097074	11.8793312357571
ENSMUSG00000019433	270.378290675132	253.616001893855	226.842438224374	197.370257105791	222.208880084161	199.353373944331	366.733991339231	312.367108997144	282.519801282441	274.455103217462	355.486909554868	229.402791743302	228.294873654607	303.494284355741	-0.413800731439844	0.00405942744810622	0.0552136078822156	Gipc1	8	84379306	84391323	+	1729	protein_coding	GIPC PDZ domain containing family, member 1 [Source:MGI Symbol;Acc:MGI:1926252]	-	254	236	245	221	241	204	375	367	288	238	366	201	9.93904933691267	9.24704556800926	8.22129602641473	7.11041788969523	8.13109165157436	7.31788051907529	13.4242304856817	11.5204970713719	10.4076166271819	9.96849339912126	13.1417958337543
ENSMUSG00000025381	1494.53196892868	1512.02421468074	1323.09324172502	1286.92552257667	1383.96485064866	1280.16137189742	1788.68392042521	1715.04012160557	1647.05120261534	1457.61029607929	1440.40187669363	1754.18950701222	1380.11686174287	1633.82948740521	-0.244045254227851	0.00407027721927335	0.0552743592885841	Cnpy2	10	128158328	128163422	+	1740	protein_coding	canopy FGF signaling regulator 2 [Source:MGI Symbol;Acc:MGI:1928477]	-	1404	1407	1429	1441	1501	1310	1829	2015	1679	1264	1483	1537	54.5913686535996	54.7811111787279	47.6488228139807	46.0694022925544	50.3220414361227	46.6951943793676	65.0605279054728	62.8529909554792	60.2913821044048	52.6072242588379	52.9127735222353
ENSMUSG00000027954	426.857065199716	585.681021322673	386.095088732914	384.023577174164	551.373071744102	391.866190939592	1153.01166877054	776.236521540586	637.631495949954	537.37847940898	1200.49677652956	394.892367876531	454.31600251886	783.274551679358	-0.78637336203444	0.00407289489954149	0.0552743592885841	Efna1	3	89179040	89188449	-	1830	protein_coding	ephrin A1 [Source:MGI Symbol;Acc:MGI:103236]	-	401	545	417	430	598	401	1179	912	650	466	1236	346	14.8251605733667	20.1758295683129	13.2206911697844	13.0711925140363	19.0623702796002	13.5907499796688	39.8763905675595	27.0485441938008	22.1930023270688	18.4409117201166	41.9310757797332
ENSMUSG00000078348	587.593765561704	579.233156867745	552.754839265108	440.287496620611	542.152786263431	537.472331712658	659.143227100377	770.278565783148	613.107207644187	676.9123764229	622.587729575603	615.164700246965	539.915729381876	659.532301128863	-0.290269524719051	0.00409578594284921	0.0554501170333276	Sf3b5	10	12881087	12884927	+	3841	protein_coding	splicing factor 3b, subunit 5 [Source:MGI Symbol;Acc:MGI:1913375]	-	552	539	597	493	588	550	674	905	625	587	641	539	9.72301360942355	9.50671437880367	9.01777134495548	7.14003691761377	8.93017204604651	8.88113603944878	10.8609725242157	12.7880527464988	10.1669222404362	11.0672916783711	10.3605389099177
ENSMUSG00000048938	68.1268133984584	95.6433227481063	66.6639002128773	92.8801209909605	74.6843123934319	152.446697722136	103.663474885223	195.7614034587	152.050587495758	163.750523768402	134.03604786495	119.837279268889	91.7408612443283	144.849886123654	-0.660215943300007	0.00409938986046747	0.0554501170333276	Nr1h5	3	102846974	102871449	-	2835	protein_coding	nuclear receptor subfamily 1, group H, member 5 [Source:MGI Symbol;Acc:MGI:3026618]	THR-like	64	89	72	104	81	156	106	230	155	142	138	105	1.52733053288535	2.12678178197894	1.47349487058463	2.0406950980447	1.6667050937252	3.41288516292676	2.31422684823781	4.40326597789643	3.41611456251422	3.62729471398256	3.02200130060953
ENSMUSG00000044708	25.5475550244219	9.67179668239277	12.9624250413928	21.433874074837	31.34897063428	29.3166726388723	73.3467982678462	123.414797832659	19.619430644614	33.442008375237	40.7935797849849	25.1087632753863	21.7135490160328	52.6208963634546	-1.28086413813701	0.0041168918672608	0.0556255950645733	Kcnj10	1	172168777	172201652	+	5407	protein_coding	potassium inwardly-rectifying channel, subfamily J, member 10 [Source:MGI Symbol;Acc:MGI:1194504]	-	24	9	14	24	34	30	75	145	20	29	42	22	0.300303915807977	0.112764429728406	0.150224532533711	0.246917981091038	0.366816915393562	0.344124049910279	0.85853502902695	1.45549855812013	0.231114619274365	0.388408915555574	0.482238127794052
ENSMUSG00000035242	6590.2047148415	6340.40004734637	5590.50874285213	6077.39637830275	5758.06828267879	5696.22949373288	7621.22131868433	8223.68121833897	6812.8472913422	6047.23765240492	6788.24593136332	6870.67067808299	6008.80127662574	7060.65068170279	-0.232982831043021	0.00413311186905259	0.0557833845886856	Oaz1	10	80662490	80665124	+	2558	protein_coding	ornithine decarboxylase antizyme 1 [Source:MGI Symbol;Acc:MGI:109433]	-	6191	5900	6038	6805	6245	5829	7793	9662	6945	5244	6989	6020	163.744373888164	156.256272352307	136.949913946728	147.987636649428	142.415975707969	141.333025319447	188.563339811761	205.006032082408	169.638921107555	148.460084947949	169.622368868445
ENSMUSG00000020381	37.2568510772819	18.2689492889641	27.7766250886989	24.1131083341917	14.752456769073	20.5216708472106	46.9419508914215	100.434111339681	29.429145966921	38.0546991856145	38.8510283666523	38.804452334688	23.7816102342367	48.7525646808297	-1.04318430656694	0.00414166416159172	0.0557991822149013	Mrnip	11	50065271	50090942	+	2039	protein_coding	MRN complex interacting protein [Source:MGI Symbol;Acc:MGI:1915317]	-	35	17	30	27	16	21	48	118	30	33	40	34	1.16133346712197	0.564829906610286	0.853636986698426	0.73662148809669	0.45775127635415	0.638781322464647	1.45705899815948	3.1409782450598	0.919301186672259	1.17204497152926	1.21789932365653
ENSMUSG00000026810	275.700697971886	306.273561609104	312.949975999341	214.33874074837	268.310307487514	277.531167647991	286.541491899719	452.804637565342	352.168780070821	318.275665916048	367.142218064864	396.033675298139	275.850741910701	362.161078135822	-0.394450856777753	0.00414336868425256	0.0557991822149013	Dpm2	2	32460870	32463591	+	1971	protein_coding	dolichol-phosphate (beta-D) mannosyltransferase 2 [Source:MGI Symbol;Acc:MGI:1330238]	-	259	285	338	240	291	284	293	532	359	276	378	347	8.89035827093685	9.79589731040787	9.94945451998638	6.77364547823057	8.61257807183723	8.93679623801159	9.20098074257381	14.6495793642224	11.3805071528037	10.1407486794535	11.906217155171
ENSMUSG00000040563	340.634066992292	371.826850234211	356.466688638302	356.338156494166	366.045333582623	246.260050166527	437.146917676363	450.251227955011	415.931929665816	417.448518339165	502.149541638981	374.348834287578	339.59519101802	432.879494927152	-0.350989504839468	0.00415285120598463	0.0558656281619969	Plppr2	9	21848329	21860203	+	2750	protein_coding	phospholipid phosphatase related 2 [Source:MGI Symbol;Acc:MGI:2384575]	-	320	346	385	399	397	252	447	529	424	362	517	328	7.87269465587264	8.52372428094369	8.12264047409776	8.07119884818089	8.42140628265879	5.68352778111454	10.0606943474961	10.4405439304995	9.6335632814653	9.53286490683452	11.6714945883976
ENSMUSG00000032607	872.874796667748	856.491328429671	885.148452826537	746.61328027349	824.293521971952	697.73680880516	999.472371063184	1087.75249400095	1134.98406279092	872.951735863944	960.591676365478	875.382792373697	813.859698162426	988.522522076362	-0.281668742923773	0.00416420688543899	0.055952086916158	Amt	9	108174052	108179501	+	2437	protein_coding	aminomethyltransferase [Source:MGI Symbol;Acc:MGI:3646700]	-	820	797	956	836	894	714	1022	1278	1157	757	989	767	22.7648318231853	22.1558685733173	22.7599633426269	19.0830853826892	21.3997547733531	18.1715855400838	25.9566411040437	28.4626591184741	29.66413039811	22.4950991729742	25.1947112946796
ENSMUSG00000019977	1090.02901437533	1153.09309335638	1122.17565358343	1119.02684232378	1088.9157152672	1234.23191809652	1613.62956189262	1538.85485849274	1321.36865391475	1112.81165800358	1317.04986162951	1297.66653836883	1134.57870616711	1366.89685538367	-0.269566126012221	0.00416838947470156	0.055952086916158	Hbs1l	10	21171878	21244797	+	6051	protein_coding	Hbs1-like (S. cerevisiae) [Source:MGI Symbol;Acc:MGI:1891704]	-	1024	1073	1212	1253	1181	1263	1650	1808	1347	965	1356	1137	11.4492997804791	12.0131958420834	11.621031062878	11.5191852673823	11.3854329944028	12.9457238248407	16.8775699624643	16.2170337332558	13.9089464338375	11.549088843592	13.9123713170912
ENSMUSG00000057346	1530.72433854661	1494.82990946759	1000.88439069612	1012.75055003605	1615.39401621349	936.179079601321	2200.40394803538	2249.5538667015	1246.81481746522	1354.97792554839	2093.09915325339	1462.01480708045	1265.12704742686	1767.81075301406	-0.483255483927171	0.00419887658115072	0.0562997840280493	Apol9a	15	77287989	77295335	-	5953	protein_coding	apolipoprotein L 9a [Source:MGI Symbol;Acc:MGI:3606001]	-	1438	1391	1081	1134	1752	958	2250	2643	1271	1175	2155	1281	16.3429001221277	15.8298658886129	10.5355935212734	10.5968068196916	17.1682103724558	9.98113125524695	23.3937455162878	24.0969139871822	13.340234375066	14.2938607165935	22.4739813271306
ENSMUSG00000020248	639.753357069898	569.561360185352	643.491814554857	554.601491686408	638.965783810473	612.71845815243	813.660482117973	703.038779377768	725.918933850717	755.328120199318	747.882296058056	628.860389306267	609.848710909903	729.114833485017	-0.258022833010144	0.00433762287380499	0.0575581169058441	Nfyb	10	82584535	82599978	-	5068	protein_coding	nuclear transcription factor-Y beta [Source:MGI Symbol;Acc:MGI:97317]	NF-YB	601	530	695	621	693	627	832	826	740	655	770	551	8.02313294969262	7.08476177139767	7.95641437802731	6.81636502116623	7.97670324552185	7.67328050934806	10.1610794170517	8.84593182552061	9.12323591503752	9.35949153034514	9.43241157813958
ENSMUSG00000119996	15.9672218902637	30.0900341229997	46.2943751478315	34.8300453716102	24.8947707978106	32.2483399027595	27.3828046866626	114.052295928112	49.0485766115349	53.0459443193414	72.845678187473	50.2175265507727	30.7207978722125	61.0988043806495	-0.992803802115024	0.00434302874448937	0.0575581169058441	ENSMUSG00000119996	5	23621532	23623540	-	2009	lncRNA	novel transcript	-	15	28	50	39	27	33	28	134	50	46	75	44	0.505146612983366	0.944200188217564	1.44397363188825	1.07989744953149	0.783990200881192	1.01878875642179	0.862643233811608	3.62013701894318	1.55504821604839	1.65815626739694	2.31766120047504
ENSMUSG00000102918	8.5158516748073	24.7168137438926	31.4801751005254	11.6100151238701	23.9727422497436	7.81777937036593	37.1623777890421	97.8807017293502	25.5052598379982	29.9824902674538	29.1382712749892	39.9457597562965	18.0188962105341	43.2691434425217	-1.26688707379902	0.00434427408986464	0.0575581169058441	Pcdhgc3	18	37939417	37974926	+	5499	protein_coding	protocadherin gamma subfamily C, 3 [Source:MGI Symbol;Acc:MGI:1935201]	-	8	23	34	13	26	8	38	115	26	26	30	35	0.0984265789400335	0.283354493654489	0.358727270048221	0.131509606359264	0.275814081703934	0.0902311323447841	0.427713543732924	1.13504810395857	0.295422398680021	0.342402707493109	0.33869295157333
ENSMUSG00000108591	38.3213325366328	24.7168137438926	15.7400875502627	22.3269521612886	23.9727422497436	22.4761156898021	46.9419508914215	45.9613729859558	56.8963488693805	49.5864262115583	22.3393413108251	55.924063658815	24.5923406552704	46.274917321326	-0.914865577058149	0.00439148352624196	0.0579725186477734	Particl	6	72416034	72417593	+	1560	TEC	promoter of Mat2a antisense radiation induced circulating long non-coding RNA [Source:MGI Symbol;Acc:MGI:1925358]	-	36	23	17	25	26	23	48	54	58	43	23	49	1.56129160843628	0.998824590132074	0.63225681345999	0.891483389262316	0.972244638006367	0.914436131856671	1.9044508315687	1.87875136163925	2.3230426696204	1.99614193801031	0.915317701626925
ENSMUSG00000030246	27.6765179431237	13.9703729856785	21.2954125680025	22.3269521612886	19.3625995094083	38.1116744305339	44.9860362709456	77.4534248467032	31.3910890313824	27.6761448622651	41.7648554941512	59.3479859236405	23.7905882663392	47.1032560715147	-0.988721712616296	0.00439443208443877	0.0579725186477734	Ldhb	6	142435975	142453683	-	1570	protein_coding	lactate dehydrogenase B [Source:MGI Symbol;Acc:MGI:96763]	-	26	13	23	25	21	39	46	91	32	24	43	52	1.12041733259334	0.560957150038174	0.849957829409683	0.885805151114149	0.780272766807658	1.54068940077984	1.81347388101606	3.14587807617726	1.27351515558368	1.10702939059556	1.70034648089543
ENSMUSG00000037709	539.692099890912	572.785292412816	539.792414223715	495.658337980607	471.156588062268	374.276187356269	650.341611308236	763.469473488932	683.737157964797	471.647635361101	732.341884711395	579.784170177103	498.893486654431	646.886988835261	-0.376481563639298	0.00440474691665779	0.0580462463845397	Fam13a	6	58909075	59001534	-	10505	protein_coding	family with sequence similarity 13, member A [Source:MGI Symbol;Acc:MGI:1889842]	-	507	533	583	555	511	383	665	897	697	409	754	508	3.26526193596812	3.4372976437846	3.21989487754062	2.93896741903213	2.83760310340554	2.26127227225844	3.91812885266812	4.63443220224768	4.14562975845928	2.81951762090721	4.45598697664323
ENSMUSG00000028964	3271.15152458535	3241.1265326774	2928.58217185182	2824.80598744623	2729.2045022785	2529.05162631338	3133.37522200239	3699.03938883266	3303.91212055299	3639.41304938786	3266.40020992629	3519.79208824052	2920.65372419211	3426.98867982379	-0.230847721502694	0.00442600482271509	0.0580547081745466	Park7	4	150981590	150998894	-	2479	protein_coding	Parkinson disease (autosomal recessive, early onset) 7 [Source:MGI Symbol;Acc:MGI:2135637]	-	3073	3016	3163	3163	2960	2588	3204	4346	3368	3156	3363	3084	83.8672024545126	82.4215539854395	74.0272915909964	70.9774692693709	69.6533472004562	64.7497186176456	79.9961537278133	95.1509967548694	84.8885954403134	92.1951403127897	84.2207227965572
ENSMUSG00000060073	1196.47716031043	1150.94380520474	1150.87816617509	1132.42301362056	1119.34265735341	1092.53466700864	1560.81986713977	1235.85025140014	1483.22895673282	1322.68908987575	1169.41595383623	1318.21007195778	1140.43324494548	1348.36903182375	-0.241674495404499	0.00442921313875551	0.0580547081745466	Psma3	12	71021395	71043121	+	3894	protein_coding	proteasome subunit alpha 3 [Source:MGI Symbol;Acc:MGI:104883]	-	1124	1071	1243	1268	1214	1118	1596	1452	1512	1147	1204	1155	19.5288417929044	18.6328596079706	18.5201447452189	18.114283129245	18.1865175738017	17.807214765733	25.368224096936	20.2381502609728	24.2610523957593	21.3311874710085	19.1954882640378
ENSMUSG00000066026	3399.95378116681	2999.33161561758	2715.62804617179	2653.33499484754	3098.01592150532	2482.14495009118	3538.2495484409	3462.42343160867	3175.40484983077	3344.2008375237	3205.20984024881	3919.24968580349	2891.4015515667	3440.78969890939	-0.251048933634796	0.00443125244634591	0.0580547081745466	Dhrs3	4	144619397	144654779	+	2927	protein_coding	dehydrogenase/reductase (SDR family) member 3 [Source:MGI Symbol;Acc:MGI:1315215]	-	3194	2791	2933	2971	3360	2540	3618	4068	3237	2900	3300	3434	73.8275255272649	64.5985994333335	58.1377922556707	56.4647974474535	66.9643044147877	53.8221614187085	76.5066112162645	75.4324769456252	69.0993192372767	71.7501539599927	69.9938433471786
ENSMUSG00000028737	7013.86833566316	6872.34886487798	5830.31360611789	6490.89153232982	6509.52154935344	6255.20071871404	8102.37631532141	7930.8902496877	6656.87281771752	6772.58328233678	8327.71793039192	7602.24873533402	6495.35743450939	7565.44822179822	-0.220183986496481	0.00444320352418774	0.0580547081745466	Aldh4a1	4	139350177	139377001	+	4907	protein_coding	aldehyde dehydrogenase 4 family, member A1 [Source:MGI Symbol;Acc:MGI:2443883]	-	6589	6395	6297	7268	7060	6401	8285	9318	6786	5873	8574	6661	90.8467871094535	88.2897889977547	74.4537935098454	82.3942122366194	83.9296573587726	80.9062196934521	104.503197887766	103.063952829658	86.4075296635653	86.674531869602	108.476595095284
ENSMUSG00000032363	213.960773329533	209.555594785177	159.25265050854	102.703979941927	147.52456769073	145.606140773066	165.274785430213	408.54553765294	144.202815237913	234.094058626659	332.176292534877	275.055088607641	163.100617838162	259.891429681707	-0.674772607744235	0.00451167269411658	0.0587617858209331	Adamts7	9	90045122	90090124	+	6282	protein_coding	a disintegrin-like and metallopeptidase (reprolysin type) with thrombospondin type 1 motif, 7 [Source:MGI Symbol;Acc:MGI:1347346]	-	201	195	172	115	160	149	169	480	147	203	342	241	2.16473255483604	2.10291959302754	1.58854568784374	1.01835160798255	1.4857606693507	1.47108740285401	1.66510604781775	4.14708992063	1.46208692871079	2.3401606247792	3.37984510729065
ENSMUSG00000006289	319.344437805274	320.243934594783	291.654563431338	282.212675318688	313.4897063428	251.146162273006	406.830241058987	370.244393497977	376.693068376588	336.726429157559	359.372012391534	346.957456168975	296.348579960981	366.13726677527	-0.306776181044707	0.00459337130610881	0.0596179115947851	Osgep	14	51143935	51162350	-	4933	protein_coding	O-sialoglycoprotein endopeptidase [Source:MGI Symbol;Acc:MGI:1913496]	-	300	298	315	316	340	257	416	435	384	292	370	304	4.11449237982397	4.09252307406727	3.70483297521183	3.56347578812691	4.0206346270687	3.23126181249594	5.21957738552785	4.7860616483411	4.86377975495573	4.28666256017828	4.6564959798611
ENSMUSG00000039145	1121.96345815586	771.594446439779	789.782040022005	734.110187063169	835.357864548756	900.021850013378	1792.59574966616	1803.55832143038	1533.25850487658	819.905791544603	1521.9890362636	752.121590839982	858.804974373825	1370.57149910355	-0.674890566431775	0.00460271130901207	0.0596179115947851	Camk1d	2	5298268	5719326	-	7427	protein_coding	calcium/calmodulin-dependent protein kinase ID [Source:MGI Symbol;Acc:MGI:2442190]	-	1054	718	853	822	906	921	1833	2119	1563	711	1567	659	9.60137229872713	6.54933203127913	6.66353682933446	6.1568169097555	7.11609243598036	7.69123970007429	15.2757367932714	15.4852306925412	13.1492004486938	6.93272125263735	13.0985793783027
ENSMUSG00000028195	204.380440195375	146.151594311713	98.1440753134027	134.854791054183	158.588910267534	162.218921935093	224.930181354728	261.298916790526	254.071626847751	191.426668630667	238.933824454912	140.380812857842	150.72312217955	218.507005156071	-0.539578052052752	0.0046065297267099	0.0596179115947851	Ccn1	3	145352731	145355736	-	2019	protein_coding	cellular communication network factor 1 [Source:MGI Symbol;Acc:MGI:88613]	-	192	136	106	151	172	166	230	307	259	166	246	123	6.43385150182757	4.56340041437691	3.04606201887201	4.16043243535674	4.96957140377697	5.09943322578124	7.05090141950276	8.25281677871582	8.01525302926872	5.95414396105774	7.56427678739687
ENSMUSG00000078974	321.473400723975	416.961901418711	207.398800662285	201.835647538049	274.764507323984	306.847840286863	443.992618848029	476.636460595097	351.18780853859	349.411328886097	465.241064690661	333.261767109673	288.213682992311	403.288508111358	-0.487596714066826	0.00463483503811488	0.0596388996896297	Sec61g	11	16450530	16458484	-	2464	protein_coding	SEC61, gamma subunit [Source:MGI Symbol;Acc:MGI:1202066]	-	302	388	224	226	298	314	454	560	358	303	479	292	8.29224953290157	10.6678526947195	5.27444186629724	5.1022951902325	7.05508690241633	7.90385719277018	11.4042905924498	12.335236212783	9.07812409125616	8.90531911864536	12.0687817504888
ENSMUSG00000093916	6.38688875610547	2.14928815164284	0	4.46539043225772	5.53217128840236	2.93166726388722	23.4709754457108	26.3852326400857	2.9429145966921	1.15317270259438	18.4542384741598	23.9674558537779	3.57756764871594	16.0623316188368	-2.17204452461769	0.00464293051702208	1	Gm379	X	107588109	107708497	-	2627	transcribed_processed_pseudogene	predicted gene 379 [Source:MGI Symbol;Acc:MGI:2685225]	-	6	2	0	5	6	3	24	31	3	1	19	21	0.15452448351482	0.0515769802090675	0	0.105878499219582	0.133234895196914	0.070829034558998	0.565463132327213	0.64047438881751	0.0713534495479534	0.0275668719584289	0.449016346571921
ENSMUSG00000086866	0	0	0	0	0	0	3.91182924095179	4.25568268388479	0.980971532230699	3.45951810778314	5.82765425499784	2.28261484321694	0	3.45304511051087	-4.27159393027828	0.00464997334067147	1	4930512H18Rik	8	62302040	62375868	+	1611	lncRNA	RIKEN cDNA 4930512H18 gene [Source:MGI Symbol;Acc:MGI:1922361]	-	0	0	0	0	0	0	4	5	1	3	6	2	0	0	0	0	0	0	0.153680079518269	0.168451394587974	0.0387845048546397	0.134856932280806	0.231219433979111
ENSMUSG00000030970	32.9989252398783	35.4632545021068	9.25887502956629	24.1131083341917	24.8947707978106	16.6127811620276	87.0382006111774	80.8579709938111	30.4101174991517	40.3610445908032	35.9372012391534	30.8153003834287	23.8902858442636	50.9033058862542	-1.10006175596083	0.00469104512571046	0.0600656700987505	Ctbp2	7	132589292	132726083	-	6220	protein_coding	C-terminal binding protein 2 [Source:MGI Symbol;Acc:MGI:1201686]	-	31	33	10	27	27	17	89	95	31	35	37	27	0.337192131939883	0.359426044317064	0.0932779108187615	0.241474471741021	0.253221272278186	0.16951521191695	0.885630873040591	0.828959604010175	0.311404655457485	0.40749775598356	0.369300557373872
ENSMUSG00000072676	1397.66415612775	1856.98496301941	1414.75610451773	1502.1573414115	1244.73853989053	1434.56251446215	1763.25703035902	1474.16848169769	2108.10782276377	2568.11560867768	1762.86541213685	1664.02622070515	1475.14393657151	1890.09009605669	-0.357410353402215	0.00469492291929657	0.0600656700987505	Tmem254	14	25923724	25928096	-	2569	protein_coding	transmembrane protein 254 [Source:MGI Symbol;Acc:MGI:1196450]	-	1313	1728	1528	1682	1350	1468	1803	1732	2149	2227	1815	1458	34.5785473782261	45.5685932798624	34.5086877729561	36.4216597081071	30.654657718379	35.4414997688548	43.4394930334166	36.5918132076203	52.2668230449404	62.7774505479499	43.861264582505
ENSMUSG00000067713	309.764104671115	240.720272983998	245.360188283507	233.093380563853	280.296678612386	251.146162273006	318.814083137571	376.202349255416	294.29145966921	388.619200774306	259.330614347404	414.294594043875	260.063464564644	341.925383537964	-0.39418888088034	0.00472879710518638	0.0603732703179824	Prkag1	15	98710678	98729402	-	2175	protein_coding	protein kinase, AMP-activated, gamma 1 non-catalytic subunit [Source:MGI Symbol;Acc:MGI:108411]	-	291	224	265	261	304	257	326	442	300	337	267	363	9.05190215281908	6.97709674714147	7.06896461620987	6.67542761879622	8.15344468838443	7.32865035450228	9.27708347607836	11.029686154768	8.61818445804476	11.2206547944483	7.62115200563012
ENSMUSG00000022894	30.8699623211765	23.6421696680712	49.0720376567013	32.1508111122556	42.4133132110848	36.1572295879424	48.8978655118974	66.3886498686028	63.7631495949954	68.0371894530683	57.3052668408121	50.2175265507727	35.7175872595386	59.1016079700248	-0.722826359797338	0.00475497227953883	0.0604391037481521	Adamts5	16	85653061	85698716	-	10791	protein_coding	a disintegrin-like and metallopeptidase (reprolysin type) with thrombospondin type 1 motif, 5 (aggrecanase-2) [Source:MGI Symbol;Acc:MGI:1346321]	-	29	22	53	36	46	37	50	78	65	59	59	44	0.18182032446189	0.138116949040999	0.284959652307598	0.185583197631254	0.248669743387784	0.212662136042383	0.286788305189431	0.392313322975361	0.376361729761245	0.395947751408838	0.339436814324909
ENSMUSG00000025731	1999.09618066101	1983.79296396634	1972.14038129762	1671.84217783729	1698.37658553952	1652.4831144111	2137.81468018016	2096.34929008165	2252.31063800168	2103.38700953215	1968.7758624801	2240.38646861743	1829.62190061881	2133.17065814886	-0.22168972212979	0.00475712942292346	0.0604391037481521	Mettl26	17	26094048	26096143	+	1766	protein_coding	methyltransferase like 26 [Source:MGI Symbol;Acc:MGI:1915597]	-	1878	1846	2130	1872	1842	1691	2186	2463	2296	1824	2027	1963	71.9467220240909	70.8152814436639	69.9774478637284	58.9675372894797	60.8451174362762	59.3885946721312	76.6147844443933	75.6961618828832	81.2334646028387	74.7965724155503	71.2576791242437
ENSMUSG00000047786	0	0	0.925887502956629	0.893078086451543	0.92202854806706	0	8.80161579214154	0	5.88582919338419	1.15317270259438	12.626584219162	9.13045937286776	0.456832356245872	6.26627688002498	-3.70076784973017	0.00480199301648401	1	Lix1	17	17622934	17679649	+	3434	protein_coding	limb and CNS expressed 1 [Source:MGI Symbol;Acc:MGI:1913893]	-	0	0	1	1	1	0	9	0	6	1	13	8	0	0	0.0168954165781216	0.0161993487157742	0.0169873844730291	0	0.162216618588773	0	0.1091703622379	0.0210885767719256	0.235023714124662
ENSMUSG00000045092	844.133797265273	986.523261604063	833.298752660966	854.675728734127	939.547090480334	919.566298439293	1060.10572429794	1132.86273045013	868.159806024168	1073.60378611537	1115.99578983209	1169.84010714868	896.290821530676	1070.0946573114	-0.255776150772672	0.0048256807012238	0.0610391455946764	S1pr1	3	115504082	115508721	-	3046	protein_coding	sphingosine-1-phosphate receptor 1 [Source:MGI Symbol;Acc:MGI:1096355]	-	793	918	900	957	1019	941	1084	1331	885	931	1149	1025	17.6136519931819	20.4173216340224	17.14280186354	17.4775230662836	19.5151139749538	19.1606335339336	22.0268558096407	23.7163747066783	18.1537839884864	22.1343790948759	23.4184827015354
ENSMUSG00000104213	9.58033313415821	18.2689492889641	9.25887502956629	14.2892493832247	0	11.7266690555489	97.7957310237949	74.0488786995954	18.6384591123833	5.76586351297189	23.3106170199914	9.13045937286776	10.5206793152437	38.1150014569341	-1.86448190552538	0.00488439834520906	1	Ighd	12	113370224	113379944	-	1900	IG_C_gene	immunoglobulin heavy constant delta [Source:MGI Symbol;Acc:MGI:96447]	-	9	17	10	16	0	12	100	87	19	5	24	8	0.320475645942184	0.606151673462302	0.305362423838261	0.468451060968156	0	0.391721839550501	3.25761326452542	2.48522548539649	0.624818373208245	0.190574138512612	0.784198964505997
ENSMUSG00000028044	59.6109617236511	73.0757971558565	57.405025183311	58.0500756193503	45.1793988552859	52.7700107499701	111.487133367126	125.117070906213	87.3064663685322	96.8665070179278	69.9318510599741	55.924063658815	57.6818782145708	91.1055153964314	-0.664775340294549	0.004888919509484	0.0614797195073365	Cks1b	3	89322779	89325690	-	1126	protein_coding	CDC28 protein kinase 1b [Source:MGI Symbol;Acc:MGI:1889208]	-	56	68	62	65	49	54	114	147	89	84	72	49	3.36477291575374	4.09125463438143	3.19464418544824	3.21124034355946	2.53854283813385	2.97444203211082	6.26642125307465	7.08564012649026	4.93861769232094	5.40242140437174	3.96974609030567
ENSMUSG00000048758	2101.2864007587	1948.32970946423	1492.53065476609	1562.8866512902	1476.16770545536	1603.62199334631	2256.14751471895	2282.7481916358	2013.93455566962	1923.49206792742	2010.54071797426	1909.40731635097	1697.47051918015	2066.04506071284	-0.284313706877047	0.00489054599891449	0.0614797195073365	Rpl29	9	106306653	106308767	+	1126	protein_coding	ribosomal protein L29 [Source:MGI Symbol;Acc:MGI:99687]	-	1974	1813	1612	1750	1601	1641	2307	2682	2053	1668	2070	1673	118.608245280319	109.080068413729	83.0607488216543	86.4564707881394	82.9430017112714	90.3899884202565	126.812577463537	129.276781083312	113.921147441965	107.276653601096	114.130200096288
ENSMUSG00000113948	1269.92638100564	1069.27085544231	1070.32595341786	1053.83214201282	982.882432239486	1142.37301049472	1356.42678930003	1164.35478231088	1225.23344375614	1236.20113718117	1386.01043698032	1456.30826997241	1098.10179576881	1304.08914325016	-0.248068493874487	0.00490664259432228	0.0616190023961823	Rpl17-ps3	12	67557530	67558085	+	556	processed_pseudogene	ribosomal protein L17, pseudogene 3 [Source:MGI Symbol;Acc:MGI:3642206]	-	1193	995	1156	1180	1066	1169	1387	1368	1249	1072	1427	1276	145.168294695673	121.236747638646	120.629141675964	118.060620356408	111.843106199437	130.403683726861	154.402666115177	133.540024841697	140.359379161349	139.626404792262	159.33742899169
ENSMUSG00000045294	3231.76571058937	4574.75983077178	3270.23466044281	3282.06196770942	2721.82827389396	2981.50560737331	5935.22291583411	9450.16896783457	5004.91675744102	3206.97328591497	11631.0266172665	3272.12837775148	3343.69267513011	6416.73948700711	-0.940473544152819	0.00491424316225368	0.0616514142173643	Insig1	5	28276361	28283660	+	3093	protein_coding	insulin induced gene 1 [Source:MGI Symbol;Acc:MGI:1916289]	-	3036	4257	3532	3675	2952	3051	6069	11103	5102	2781	11975	2867	66.4091574542118	93.2416002066362	66.2536745520144	66.0960138459859	55.6753864480077	61.1804163080692	121.447993257578	194.83212471721	103.065740061703	65.113138731768	240.361123773072
ENSMUSG00000024299	204.380440195375	239.645628908176	220.361225703678	240.238005255465	271.076393131716	212.057265421176	346.196887824234	394.076216527732	326.663520232823	220.255986195526	273.899749984899	286.468162823726	231.293159769264	307.92675393149	-0.414724476548526	0.00497463420025958	0.0621550938429177	Adamts10	17	33743178	33772756	+	8254	protein_coding	a disintegrin-like and metallopeptidase (reprolysin type) with thrombospondin type 1 motif, 10 [Source:MGI Symbol;Acc:MGI:2449112]	-	192	223	238	269	294	217	354	463	333	191	282	251	1.57377588831959	1.83031730815702	1.67294509401093	1.81294930685747	2.07782837587016	1.63059238396203	2.65455619302132	3.04450487190229	2.52077196848008	1.67577792261272	2.12106153169329
ENSMUSG00000022587	5905.74313647886	6954.0218146404	5087.75182874668	5607.63730482924	5923.11139278279	5663.98115383012	11031.3584594841	10191.5088913673	7626.07269156145	4694.56607226171	8052.84690469785	5817.24392793837	5857.04110521802	7902.26615788513	-0.432263717688733	0.00498646558560938	0.0621703774202277	Ly6e	15	74826900	74831752	+	3782	protein_coding	lymphocyte antigen 6 complex, locus E [Source:MGI Symbol;Acc:MGI:106651]	-	5548	6471	5495	6279	6424	5796	11280	11974	7774	4071	8291	5097	99.2478370940052	115.913992130707	84.2976305151605	92.3563591098658	99.0856618913734	95.0510661437056	184.603827301186	171.837472504548	128.43305217665	77.9519780000637	136.098711748265
ENSMUSG00000046330	2408.92154251111	2486.72639145076	2008.24999391293	1839.74085809018	2282.94268501404	1633.91588840648	2811.6272669341	2477.65845855773	2546.60209767089	2418.20315734041	2636.04227467736	2509.73502011703	2110.08289323092	2566.64471254959	-0.282943366627937	0.00499104316368218	0.0621703774202277	Rpl37a	1	72750449	72752972	+	1410	protein_coding	ribosomal protein L37a [Source:MGI Symbol;Acc:MGI:98068]	-	2263	2314	2169	2060	2476	1672	2875	2911	2596	2097	2714	2199	108.585432218882	111.180911453665	89.2502897077915	81.272936730025	102.437349944841	73.5473959742335	126.203634450142	112.052935821142	115.037482046	107.702771641958	119.497647174102
ENSMUSG00000028617	312.957549049168	314.870714215676	375.910326200391	360.803546926424	316.255791987002	312.711174814637	477.243167396119	451.953501028565	310.967975717132	423.214381852137	520.60378011314	383.479293660446	332.251517198883	427.910349961256	-0.365062151002388	0.00500823456908485	0.0622582358071864	Lrrc42	4	107090711	107110729	-	2139	protein_coding	leucine rich repeat containing 42 [Source:MGI Symbol;Acc:MGI:1925059]	-	294	293	406	404	343	320	488	531	317	367	536	336	9.29913749017215	9.27988990502608	11.0124625408525	10.5067506544868	9.35427519877094	9.278747017559	14.1208930288357	13.4736072405545	9.25981413310022	12.4251843651094	15.5568845537811
ENSMUSG00000032198	541.821062809614	650.159665871959	702.748614744081	651.053925023175	602.08464188779	670.374581008879	698.261519509895	866.456994438944	698.451730948258	841.816072893896	844.038591265521	695.056219759558	636.373748557583	774.013521469345	-0.282474842198637	0.00504571749818026	0.0623501804958003	Dock6	9	21711156	21763931	-	8782	protein_coding	dedicator of cytokinesis 6 [Source:MGI Symbol;Acc:MGI:1914789]	-	509	605	759	729	653	686	714	1018	712	730	869	609	3.92130364116863	4.66710884995322	5.01438341399632	4.61776620179766	4.33757058951144	4.84485543982125	5.03220013055703	6.29150421820742	5.06571033619074	6.01972967699825	6.14320442522513
ENSMUSG00000028861	461.984953358296	601.800682459995	476.832064022664	500.123728412864	484.064987735207	485.679543383984	580.906642281342	617.925125700072	553.267944178114	616.947395887992	676.00789357975	588.914629549971	501.747659895501	605.661605196207	-0.272292505380552	0.00506650587075205	0.0625006030419842	Mrps15	4	125940718	125949325	+	1693	protein_coding	mitochondrial ribosomal protein S15 [Source:MGI Symbol;Acc:MGI:1913657]	-	434	560	515	560	525	497	594	726	564	535	696	516	17.3435858531158	22.4087203559254	17.6489741125658	18.4004699080817	18.0896078542236	18.2074686497114	21.7161389860802	23.2744705009533	20.814977111013	22.8846558532865	25.5223644089075
ENSMUSG00000024217	331.053733858134	364.304341703461	373.132663691522	298.288080874815	395.550247120769	421.182863578465	403.896369128273	460.464866396335	485.580908454196	441.665145093647	435.131517706506	477.06650223234	363.918655137861	450.634218168549	-0.308285795175804	0.00508475220843621	0.062638843153474	Snrpc	17	28057124	28070942	+	6521	protein_coding	U1 small nuclear ribonucleoprotein C [Source:MGI Symbol;Acc:MGI:109489]	-	311	339	403	334	429	431	413	541	495	383	448	418	3.22665336242288	3.52185511854974	3.58558515462286	2.84924707953527	3.83769007549209	4.09933310851997	3.92002626694233	4.50280574772406	4.74290898233525	4.25335993239159	4.26513161700343
ENSMUSG00000032679	1636.10800302235	1523.84529951477	1451.79160463599	1475.36499881795	1404.24947870613	1303.61471000852	1662.52742740451	1846.11514826922	1742.20544124172	1539.4855579635	1677.39314973021	1746.20035506096	1465.82901578429	1702.32117994502	-0.216474317339176	0.00509552200621866	0.0627086185174124	Cd59a	2	103926146	103945699	+	1811	protein_coding	CD59a antigen [Source:MGI Symbol;Acc:MGI:109177]	-	1537	1418	1568	1652	1523	1334	1700	2169	1776	1335	1727	1530	57.419782124361	53.0449163166965	50.2338891827139	50.7445537743943	49.0578216571076	45.6864611874056	58.1009985887195	65.0041746661047	61.2742921489698	53.3839097004131	59.2028359615665
ENSMUSG00000092545	971.871572387383	1164.91417819042	1124.9533160923	832.348776572838	851.032349865896	1025.10631993923	1201.90953428244	1084.34794785385	1169.31806641899	1215.44402853447	1332.59027297617	1239.4598598668	995.037752174679	1207.17828498879	-0.279064385810353	0.00512520360720623	0.0629477507037069	Gm20319	16	26492212	26574275	-	2615	lncRNA	predicted gene, 20319 [Source:MGI Symbol;Acc:MGI:5012504]	-	913	1084	1215	932	923	1049	1229	1274	1192	1054	1372	1086	23.6213768011858	28.0830049862323	26.9571378749762	19.82631784805	20.5900221999207	24.8802039008318	29.0893029980623	26.4422180169699	28.481204621959	29.1888160447692	32.5724961866513
ENSMUSG00000041025	325.731326561379	320.243934594783	269.433263360379	275.068050627075	380.797790351696	270.69061069892	404.874326438511	566.005796956678	414.950958133586	393.231891584683	298.181642714056	380.055371395621	306.994162699039	409.549997870522	-0.417316168868404	0.00518344915189825	0.0635995229606537	Iffo2	4	139257859	139347693	+	6216	protein_coding	intermediate filament family orphan 2 [Source:MGI Symbol;Acc:MGI:2140675]	-	306	298	291	308	413	277	414	665	423	341	307	333	3.33055449289979	3.24781472399837	2.71613391473898	2.75637026301646	3.87584011097133	2.76387821958693	4.12232721022473	5.80645128034154	4.25190109181286	3.97274724396144	3.06616832901885
ENSMUSG00000109783	96.867812800933	123.584068719463	81.4781002601834	85.7354962993482	91.280826258639	96.7450197082784	153.539297707358	115.754569001666	116.735612335453	118.776788367221	166.088146267438	139.239505436233	95.9485540078075	135.022319852562	-0.495403238280941	0.00520133217292244	0.0637552512453427	Gm45338	16	23338960	23378831	+	5216	lncRNA	predicted gene 45338 [Source:MGI Symbol;Acc:MGI:5791174]	-	91	115	88	96	99	99	157	136	119	103	171	122	1.18034763086664	1.49364106653186	0.978845806475409	1.02383859183991	1.10719577257627	1.17719321989151	1.86301003989251	1.41514673115977	1.42548670267985	1.43003676790331	2.0352939957822
ENSMUSG00000030814	215.025254788884	249.317425590569	302.765213466818	189.332554327727	232.351194112899	210.102820578584	284.585577279243	304.706880166151	276.633972089057	359.789883209446	307.894399805719	287.609470245334	233.149077144247	303.536697132492	-0.379961606954892	0.00526475503813827	0.0642036891760491	Bcl7c	7	127260628	127308105	-	7222	protein_coding	B cell CLL/lymphoma 7C [Source:MGI Symbol;Acc:MGI:1332237]	-	202	232	327	212	252	215	291	358	282	312	317	252	1.8923436553834	2.17628860884375	2.62699631585034	1.63296253944521	2.03549417428085	1.84642263750092	2.49395510101925	2.69045473308997	2.43975050186548	3.12856132124831	2.72502444107104
ENSMUSG00000008683	1362.53626796917	1455.0680786622	1341.61099178416	1435.17648492763	1238.28434005406	1234.23191809652	1802.37532276854	1523.53440083076	1558.76376471458	1464.52933229486	1489.93693786111	1572.72162697647	1344.48468024896	1568.64356424105	-0.222736036638197	0.0052904587215755	0.0643916545120891	Rps15a	7	117703595	117715411	-	6270	protein_coding	ribosomal protein S15A [Source:MGI Symbol;Acc:MGI:2389091]	-	1280	1354	1449	1607	1343	1263	1843	1790	1589	1270	1534	1378	13.8117450103029	14.6297569673433	13.4081864285346	14.2575919502997	12.4949717592589	12.4935526099061	18.1932765046071	15.4947879444783	15.8347112444641	14.6684336915768	15.1889041862651
ENSMUSG00000033854	31.9344437805274	73.0757971558565	74.996887739487	78.5908716077358	57.1657699801577	85.0183506527295	188.745760875924	118.307978611997	75.5348079817638	102.6323705309	117.524360809123	74.1849824045506	66.797020152749	112.821710202376	-0.756184226326323	0.00529928398371372	0.0643916545120891	Kcnk10	12	98395696	98544569	-	8774	protein_coding	potassium channel, subfamily K, member 10 [Source:MGI Symbol;Acc:MGI:1919508]	-	30	68	81	88	62	87	193	139	77	89	121	65	0.231328822768084	0.525045899055561	0.535619751865836	0.557934076489313	0.412212224000876	0.61499525185869	1.36148482345734	0.859839351235249	0.54833616066828	0.734581418337878	0.856162819789191
ENSMUSG00000073889	974.000535306085	793.087327956207	712.933377276604	771.619466694133	772.659923280196	753.438486819017	930.037402036289	1334.58208966627	877.969521346475	837.203382083519	1078.1160371746	956.415619307898	796.289852888707	1002.38734193584	-0.333421168846432	0.00530043663179629	0.0643916545120891	Il11ra1	4	41699989	41769474	+	4471	protein_coding	interleukin 11 receptor, alpha chain 1 [Source:MGI Symbol;Acc:MGI:107426]	-	915	738	770	864	838	771	951	1568	895	726	1110	838	13.8459432508384	11.1824684111837	9.99206499833095	10.7499617211659	10.933674882344	10.6954693722047	13.1652458234645	19.0345027240511	12.5075473947971	11.7592469990739	15.4129912784532
ENSMUSG00000018293	3253.05533977639	3437.78639855272	2975.80243450261	3047.18243097267	3132.1309777838	2805.60557154007	3666.36195608207	4117.79856492693	3574.66026344867	3400.70629995082	3478.13831452455	3336.04159336156	3108.59385885471	3595.6178320491	-0.210466705429419	0.0053238629855305	0.0646123371425747	Pfn1	11	70542676	70545470	-	2405	protein_coding	profilin 1 [Source:MGI Symbol;Acc:MGI:97549]	-	3056	3199	3214	3412	3397	2871	3749	4838	3644	2949	3581	2923	85.9694982951581	90.1125225992715	77.5353919921301	78.9208559782838	82.3962170970718	74.0403140181575	96.4835968587983	109.181971022351	94.6710250299728	88.7988320582135	92.4395588115445
ENSMUSG00000029859	793.03868721643	941.388210419563	787.930265016091	760.009451570263	847.344235673628	871.682399795802	957.420206722952	1006.04338647037	930.941984086933	935.223061804041	1081.0298643021	958.698234151115	833.565541615296	978.226122922918	-0.23176104711564	0.0053459156348959	0.0646882126382182	Epha1	6	42335421	42350202	-	3928	protein_coding	Eph receptor A1 [Source:MGI Symbol;Acc:MGI:107381]	-	745	876	851	851	919	892	979	1182	949	811	1113	840	12.8318985299604	15.108404895631	12.5697684089635	12.0519112856322	13.6480573675334	14.0845674997918	15.4263911235838	16.3322547086155	15.0955355441605	14.9519190445053	17.5910721130434
ENSMUSG00000018983	4.25792583740365	19.3435933647855	12.0365375384362	2.67923425935463	12.9083996729388	14.6583363194361	42.0521643402318	23.8318230297548	16.6765160479219	23.0634540518876	51.4776125858143	14.8369964809101	10.9806711653925	28.6564277560867	-1.39032390968222	0.00535249474882721	1	E2f2	4	135899705	135923368	+	4882	protein_coding	E2F transcription factor 2 [Source:MGI Symbol;Acc:MGI:1096341]	E2F	4	18	13	3	14	15	43	28	17	20	53	13	0.0554329944276162	0.249781758107944	0.154495122261472	0.0341838776054702	0.167285025793803	0.190565212808775	0.545159778188706	0.311286583657285	0.217572968958217	0.296674201699273	0.673979548389952
ENSMUSG00000047459	1127.28586545262	1210.04922937492	1029.58690328777	1062.76292287734	926.638690807395	1088.62577732346	1342.7353869567	1379.69232611545	1363.55042980067	1246.57969150452	1068.40328008294	1270.27516025023	1074.15823152058	1278.53937911842	-0.252030252097957	0.00538159090226006	0.0649918382119549	Dynlrb1	2	155078453	155092197	+	1009	protein_coding	dynein light chain roadblock-type 1 [Source:MGI Symbol;Acc:MGI:1914318]	-	1059	1126	1112	1190	1005	1114	1373	1621	1390	1081	1100	1113	71.0085945601001	75.6019874194163	63.9414994138235	65.6075228474356	58.1034208838295	68.4769115950272	84.2233471077052	87.1950830169012	86.0750781723945	77.5857726642328	67.6815260909124
ENSMUSG00000039463	868.616870830344	812.430921320993	737.932339856433	742.147889841232	794.788608433806	815.003499360649	979.913224858425	1048.60021330921	842.65454618617	894.862017213238	1118.90961695959	843.426184568659	795.153354940576	954.727633849215	-0.26515387920708	0.00540106089221366	0.0650989498313721	Slc9a8	2	167263632	167318920	+	9095	protein_coding	solute carrier family 9 (sodium/hydrogen exchanger), member 8 [Source:MGI Symbol;Acc:MGI:1924281]	-	816	756	797	831	862	834	1002	1232	859	776	1152	739	6.07006830943451	5.63125352495716	5.08422560108059	5.0827197647239	5.52880623174154	5.68739625207736	6.8189600142974	7.35204491063815	5.90125324448469	6.17883474047269	7.86354541648674
ENSMUSG00000047617	150.091885768479	293.377832699247	141.660787952364	167.89868025289	166.887167200138	208.148375735993	313.924296586382	271.51255523185	240.338025396521	204.111568359205	339.946498208207	244.239788224213	188.010788268185	269.012122001063	-0.519558567180786	0.00544535796582208	0.0655042963136403	Paxx	2	25345153	25351106	-	2066	protein_coding	non-homologous end joining factor [Source:MGI Symbol;Acc:MGI:2442831]	-	141	273	153	188	181	213	321	319	245	177	350	214	4.61737256899597	8.95196381256466	4.29665327249674	5.06203772319171	5.11063735176629	6.39439450089092	9.61673925476307	8.38031827118209	7.40951120213069	6.20426745225474	10.5173505847953
ENSMUSG00000031147	283.152068187343	320.243934594783	297.209888449078	251.848020379335	313.4897063428	241.373938060048	327.615698929713	395.778489601286	370.807239183204	471.647635361101	408.907073559015	267.065936656382	284.552926002231	373.637012215117	-0.393532147343808	0.00545092812252428	0.0655071420751891	Magix	X	7539403	7547490	-	2910	protein_coding	MAGI family member, X-linked [Source:MGI Symbol;Acc:MGI:1859644]	-	266	298	321	282	340	247	335	465	378	409	421	234	6.18436011680717	6.93760011146867	6.40001863570294	5.39080924541963	6.81573560664257	5.26446332477234	7.12532935694305	8.67281556403917	8.11619742517927	10.1783617208351	8.98168315733601
ENSMUSG00000025498	872.874796667748	757.624073454101	679.601427170166	722.500171939299	987.492574979821	752.461264397721	1307.52892378814	1742.27649078243	847.559403847324	673.452858315117	1183.01381376456	917.61116697321	795.425718101476	1111.90710957846	-0.484122334860971	0.00547701189207688	0.0656024943118364	Irf7	7	140842619	140846394	-	3776	protein_coding	interferon regulatory factor 7 [Source:MGI Symbol;Acc:MGI:1859212]	IRF	820	705	734	809	1071	770	1337	2047	864	584	1218	804	14.6922391824954	12.6486192454317	11.2780306219502	11.9183018705997	16.5456674889537	12.6476220705858	21.9155587284796	29.4229357842409	14.2966915903582	11.2002682252963	20.0255257289435
ENSMUSG00000033318	2150.25254788884	2367.44089903459	1806.40651826838	2298.78299452627	2081.94046153542	1571.37365344355	2075.22541232493	3109.20176884623	2422.0187130776	2143.74805412295	2900.22926757059	2815.6054091081	2046.03284578284	2577.6714375084	-0.333507277674326	0.00548741585578194	0.0656245779364302	Gstt2	10	75666948	75673258	-	4156	protein_coding	glutathione S-transferase, theta 2 [Source:MGI Symbol;Acc:MGI:106188]	-	2020	2203	1951	2574	2258	1608	2122	3653	2469	1859	2986	2467	32.8837966294007	35.910788931823	27.2364766344093	34.4533018342587	31.6938651484848	23.9972041264575	31.602611068127	47.7061402057997	37.1192628356871	32.3930180288931	44.6049326799439
ENSMUSG00000086447	65.9978504797566	40.8364748812139	58.3309126862676	42.8677481496741	51.6335986917554	39.0888968518297	130.068322261647	62.132967184718	52.9724627404577	77.2625710738234	146.662632084112	55.924063658815	49.7925802900829	87.5038365005956	-0.814923531876885	0.00559052152508299	0.0664692985199121	Gm13522	2	52257075	52280319	+	1276	lncRNA	predicted gene 13522 [Source:MGI Symbol;Acc:MGI:3651428]	-	62	38	63	48	56	40	133	73	54	67	151	49	3.28735902925716	2.01752493195548	2.86456756531661	2.09261053880759	2.56014262045564	1.94428290268012	6.45140181775527	3.10507670183847	2.64421568599101	3.8025216038645	7.34674382565212
ENSMUSG00000036986	554.594840321825	472.843393361424	456.462538957618	514.412977796089	610.382898820394	541.381221397841	667.944842892519	611.967169942633	597.411663128496	625.019604806153	786.733324424709	584.349399863537	525.012978442532	645.571000843008	-0.298434854705391	0.00566059041000262	0.0670589836854155	Pml	9	58125359	58157069	-	5571	protein_coding	promyelocytic leukemia [Source:MGI Symbol;Acc:MGI:104662]	-	521	440	493	576	662	554	683	719	609	542	810	512	6.32718725778671	5.35063721809881	5.13432027300843	5.75158007004521	6.93188961077238	6.16774978027369	7.58823323169024	7.00480224066779	6.83027085413429	7.04553034788326	9.02652281438647
ENSMUSG00000029106	1050.64320037935	1020.91187203035	874.037802791058	798.41180928768	882.381320500176	979.176866138333	1209.73319276434	1035.83316525756	1089.85937230831	1095.51406746466	1054.80542015461	1160.70964777581	934.260478521158	1107.74247762088	-0.246311626283038	0.00566195783111674	0.0670589836854155	Add1	5	34731008	34789652	+	8561	protein_coding	adducin 1 (alpha) [Source:MGI Symbol;Acc:MGI:87918]	-	987	950	944	894	957	1002	1237	1217	1111	950	1086	1017	7.8000750020815	7.51770182564884	6.39759424595615	5.80912694311784	6.52100071420694	7.25927693548498	8.94331089313642	7.71553823994981	8.10855288674641	8.03612475213795	7.87542412958802
ENSMUSG00000094156	39.3858139959838	164.420543600677	147.216112970104	194.691022846436	103.267197383511	150.492252879544	332.505485480903	89.3693363615807	186.384591123833	530.459443193414	537.115467168968	276.19639602925	133.245490612709	325.338453226325	-1.28704021095374	0.00568103388898526	0.0671553977136833	Sult2a7	7	14198976	14228155	-	1278	protein_coding	sulfotransferase family 2A, dehydroepiandrosterone (DHEA)-preferring, member 7 [Source:MGI Symbol;Acc:MGI:3645246]	-	37	153	159	218	112	154	340	105	190	460	553	242	1.95874090677582	8.11048013787587	7.21830893908754	9.48906638561279	5.11227227496306	7.47377479476242	16.4664958441582	4.4592168468746	9.28916204300208	26.0660089295811	26.8635189099651
ENSMUSG00000000120	73.4492206952129	29.0153900471783	27.7766250886989	20.5407959883855	45.1793988552859	79.1550161249551	220.040394803538	117.45684207522	99.0781247553006	33.442008375237	76.7307810241383	49.0762191291642	45.8527411332861	99.3040616937665	-1.11898580540219	0.00570080095759082	0.067269196749245	Ngfr	11	95459644	95478561	-	3446	protein_coding	nerve growth factor receptor (TNFR superfamily, member 16) [Source:MGI Symbol;Acc:MGI:97323]	-	69	27	30	23	49	81	225	138	101	29	79	43	1.35469004910751	0.530804357116795	0.505097450922255	0.37128756827315	0.829483237300847	1.45787364835611	4.04129329827224	2.17352159849153	1.83130167423194	0.609439061639288	1.42324754029249
ENSMUSG00000074657	134.124663878215	161.196611373213	91.6628627927063	133.961712967732	118.019654152584	93.8133524443912	149.627468466406	190.654584238039	154.01253056022	151.065624039864	188.427487578264	188.315724565398	122.129809601473	170.350569908032	-0.482714601824324	0.00571806117186839	0.0672693748207735	Kif5a	10	127061565	127099217	-	6990	protein_coding	kinesin family member 5A [Source:MGI Symbol;Acc:MGI:109564]	-	126	150	99	150	128	96	153	224	157	131	194	165	1.21954966839229	1.45378462456245	0.821726350843734	1.19374599763881	1.06821728467652	0.85181286998106	1.35477564520392	1.73928595297838	1.40338318445915	1.35719322105262	1.72303134428297
ENSMUSG00000063320	169.252552036795	162.271255449034	154.623212993757	112.527838892894	193.625995094083	147.560585615657	189.723718186162	314.920518607475	196.19430644614	197.192532143639	234.07744590908	181.467880035747	156.643573347037	218.929400221374	-0.486279003522096	0.00572840144153532	0.0673265325406094	1190007I07Rik	10	82455685	82459062	-	1197	protein_coding	RIKEN cDNA 1190007I07 gene [Source:MGI Symbol;Acc:MGI:3698433]	-	159	151	167	126	210	151	194	370	200	171	241	159	8.9868831930877	8.54611603107447	8.09452774301423	5.85563826210195	10.2341540842775	7.82407377938169	10.031380528856	16.776745659491	10.4397389007226	10.3454532335418	12.4994676220863
ENSMUSG00000019189	372.568510772819	395.469019902282	511.089901632059	451.897511744481	463.780359677731	574.606783721896	581.88459959158	695.378550546775	513.048111356655	600.802978051671	620.64517815727	503.316572929335	461.568681241878	585.845998438881	-0.343979709647681	0.00574654077235047	0.0674751565640616	Rnf145	11	44409791	44456347	+	7786	protein_coding	ring finger protein 145 [Source:MGI Symbol;Acc:MGI:1921565]	-	350	368	552	506	503	588	595	817	523	521	639	441	3.04130354413267	3.20198584249892	4.11333303521152	3.61521360466531	3.76860302787467	4.68395880582476	4.72994065700743	5.69518457972158	4.19702041083884	4.84586025465283	5.09512780849565
ENSMUSG00000026281	292.732401321501	366.453629855104	316.653526011167	220.590287353531	281.218707160453	312.711174814637	403.896369128273	343.008024321114	428.684559584815	384.006509963928	376.854975156527	349.240071012192	298.393287752732	380.948418194475	-0.353776505681738	0.00575785418261745	0.067494659599328	Dtymk	1	93720298	93729656	-	2631	protein_coding	deoxythymidylate kinase [Source:MGI Symbol;Acc:MGI:108396]	-	275	341	342	247	305	320	413	403	437	333	388	306	7.07160458654467	8.7805054941361	7.5417903082517	5.22244590726805	6.76247695762696	7.54361074517624	9.71588418347812	8.31350849582166	10.3780170692514	9.16581204385631	9.15544591146935
ENSMUSG00000046031	9.58033313415821	22.5675255922498	25.9248500827856	18.7546398154824	32.2709991823471	22.4761156898021	66.5010970961805	45.9613729859558	36.2959466925359	12.6848997285382	86.4435381158013	38.804452334688	21.9290772494709	47.7818844922833	-1.12412290575808	0.00575919257939226	0.067494659599328	Calhm6	10	34002063	34003980	-	1094	protein_coding	calcium homeostasis modulator family member 6 [Source:MGI Symbol;Acc:MGI:2443082]	-	9	21	28	21	35	23	68	54	37	11	89	34	0.556584759863025	1.30043293747424	1.48494341391184	1.06782434487143	1.866283125972	1.30394914597478	3.8471995774834	2.67902387948559	2.11318828233136	0.7281534725619	5.05058062530332
ENSMUSG00000024387	1355.08489775371	1373.39512889977	1255.50345400919	1316.39709942957	1159.91191346836	1170.7124607123	1494.31877004359	1624.81964870721	1535.22044794104	1323.84226257835	1471.48269938696	1425.49296958898	1271.83415904548	1479.19613304102	-0.218892458987973	0.00581949702161963	0.0681363798088964	Csnk2b	17	35335172	35341029	-	2067	protein_coding	casein kinase 2, beta polypeptide [Source:MGI Symbol;Acc:MGI:88548]	-	1273	1278	1356	1474	1258	1198	1528	1909	1565	1148	1515	1249	41.6671743718949	41.8867211218635	38.0617198247168	39.6693287780424	35.5031568827869	35.9473170127741	45.7547306703928	50.1262941910459	47.3072449961734	40.2206396636391	45.5030785222245
ENSMUSG00000091813	9.58033313415821	16.1196611373213	25.9248500827856	3.57231234580617	9.2202854806706	5.86333452777445	24.4489327559487	22.9806864929779	17.6574875801526	70.3435348582571	26.2244441474903	22.8261484321694	11.7134627847527	30.7468723778327	-1.38884522181832	0.00583222750928046	1	Ces2h	8	105727485	105747810	+	2445	protein_coding	carboxylesterase 2H [Source:MGI Symbol;Acc:MGI:3648740]	-	9	15	28	4	10	6	25	27	18	61	27	20	0.249040379259775	0.415621861991474	0.664428668637853	0.0910078748302144	0.238587641228556	0.152202759743548	0.632869652617412	0.599356262608842	0.459988986410978	1.80675195530567	0.685572714368739
ENSMUSG00000036188	192.671144142515	159.04732322157	244.43430078055	197.370257105791	190.859909449881	183.717815203599	256.224815282343	251.93641488598	244.261911525444	224.868677005904	295.267815586557	239.674558537779	194.683458317318	252.039032137334	-0.372079878343314	0.00585643962956123	0.0684767849129318	Ankmy2	12	36207113	36247290	+	6020	protein_coding	ankyrin repeat and MYND domain containing 2 [Source:MGI Symbol;Acc:MGI:2144755]	-	181	148	264	221	207	188	262	296	249	195	304	210	2.0341745042362	1.66552521572796	2.54434870095136	2.0421781613427	2.00586020000649	1.93691917341416	2.6937539586059	2.66867303048647	2.58438164333643	2.34577137272169	3.13505898324103
ENSMUSG00000036435	182.026329549006	256.839934121319	199.065813135675	208.980272229661	204.690337670887	226.715601740612	240.577498318535	307.260289776482	287.424658943595	223.715504303309	298.181642714056	291.03339251016	213.053048074527	274.698831094356	-0.368575430031105	0.00591301433483696	0.0690338802856156	Exoc1	5	76677158	76718141	+	12042	protein_coding	exocyst complex component 1 [Source:MGI Symbol;Acc:MGI:2445020]	-	171	239	215	234	222	232	246	361	293	194	307	255	0.960734995724368	1.34457572476348	1.03587900795491	1.08097358052256	1.07542755175592	1.19492184904128	1.26441491433249	1.62707932240363	1.52027722429842	1.16667708778855	1.58273561976259
ENSMUSG00000031842	606.75443183002	657.682174402709	570.346701821284	630.51312903479	540.308729167297	497.406212439533	670.878714823233	711.550144745537	698.451730948258	826.824827760169	708.059991982238	626.57777446305	583.835229782605	707.057197453747	-0.27642422999874	0.00595182306047658	0.0693551146383049	Pde4c	8	71176369	71203835	+	5596	protein_coding	phosphodiesterase 4C, cAMP specific [Source:MGI Symbol;Acc:MGI:99556]	-	570	612	616	706	586	509	686	836	712	717	729	549	6.89133358262619	7.40900187005387	6.38663654146357	7.01818545816973	6.10867074201284	5.64144315924007	7.58751452641606	8.10827964351339	7.94979774346445	9.27874013208476	8.08757733006654
ENSMUSG00000020153	2062.96506822207	2033.22659145413	1701.78123043428	1954.94793124243	1814.55218259597	1866.49482467487	2067.40175384302	2309.13342427589	2061.0211892167	2340.94058626659	2116.40977027338	2267.77784673603	1905.66130477062	2193.7807617686	-0.203294647839149	0.00596194771424672	0.0694072434373253	Ndufs7	10	80084955	80092628	+	1718	protein_coding	NADH:ubiquinone oxidoreductase core subunit S7 [Source:MGI Symbol;Acc:MGI:1922656]	-	1938	1892	1838	2189	1968	1910	2114	2713	2101	2030	2179	1987	76.3197143634918	74.6077530562995	62.0714002635609	70.8794676830856	66.8234265749661	68.9541402662382	76.1614053451268	85.7090696852346	76.4111409843145	85.569784894429	78.7413206478288
ENSMUSG00000113063	254.411068784868	289.079256395962	249.98962579829	242.024161428368	238.805393949369	194.467261837853	275.783961487102	303.004607092597	257.014541444443	339.032774562747	405.993246431516	338.968304217716	244.796128032451	319.96623920602	-0.386433993678046	0.00597638126439979	0.0695093889103771	Gm34667	12	109943803	109990307	-	2288	lncRNA	predicted gene, 34667 [Source:MGI Symbol;Acc:MGI:5593826]	-	239	269	270	271	259	199	282	356	262	294	418	297	7.06721012152029	7.96493521972908	6.84663126875123	6.5888726860933	6.60344478785793	5.39445030354182	7.628624069636	8.44489248413604	7.15482577712239	9.30548197317703	11.3419802158119
ENSMUSG00000027048	5367.1155180473	5824.57089095209	5194.22889158669	7010.66297864461	5702.74656979477	5813.49618428837	7526.35945959125	9305.47575658249	8092.03416937103	5042.82422844522	7876.07472562958	6157.3535395777	5818.80350555231	7333.35364653288	-0.333894699232197	0.00599468109891312	0.0695247150678479	Abcb11	2	69068626	69172960	-	5146	protein_coding	ATP-binding cassette, sub-family B (MDR/TAP), member 11 [Source:MGI Symbol;Acc:MGI:1351619]	-	5042	5420	5610	7850	6185	5949	7696	10933	8249	4373	8109	5395	66.288651228504	71.3535348221895	63.2502540942874	84.8589629607954	70.1127060171323	71.700853812399	92.5653404570471	115.310727761984	100.157923835888	61.5399667570828	97.8286684321183
ENSMUSG00000049299	483.274582545314	491.112342650389	463.869638981271	458.149058349642	350.370848265483	379.162299462748	682.614202546088	441.739862587242	550.325029581422	488.945225900016	568.19628986229	619.729929933399	437.656461709141	558.591756735076	-0.3521468915839	0.00604718732736567	0.0698161380351097	Trappc1	11	69214806	69216619	+	1112	protein_coding	trafficking protein particle complex 1 [Source:MGI Symbol;Acc:MGI:1098727]	-	454	457	501	513	380	388	698	519	561	424	585	543	27.6221315137618	27.8418058647544	26.1397923787447	25.6631772215412	19.9345123620011	21.6409877185723	38.8511394911296	25.3316055894885	31.5218621735455	27.612684529813	32.6602648774136
ENSMUSG00000051154	876.068241045801	969.32895639092	943.479365512805	876.109602808964	924.794633711261	893.181293064308	1095.3121874665	1153.29000733278	1026.09622271331	990.575351528571	1055.77669586378	996.361379064194	913.827015422343	1052.90197399486	-0.205381509801221	0.00609095460479256	0.070177396300246	Commd3	2	18677195	18681042	+	2330	protein_coding	COMM domain containing 3 [Source:MGI Symbol;Acc:MGI:88218]	-	823	902	1019	981	1003	914	1120	1355	1046	859	1087	873	23.8973661211156	26.2262746271066	25.3739136821141	23.4212964736735	25.1114516374348	24.329905098834	29.7519357378115	31.5633812448979	28.0497861963873	26.6983735164321	28.9629134727152
ENSMUSG00000036860	301.248252996308	367.528273930925	315.727638508211	304.539627479976	275.686535872051	279.485612490582	333.483442791141	424.717131851702	379.63598297328	366.708919425012	395.309213630687	378.914063974012	307.369323546342	379.794792440972	-0.30697384028839	0.00613592789611542	0.0705631708053274	Mrpl55	11	59093312	59096960	+	1027	protein_coding	mitochondrial ribosomal protein L55 [Source:MGI Symbol;Acc:MGI:1914462]	-	283	342	341	341	299	286	341	499	387	318	407	332	18.6432711049564	22.5601327347387	19.2642954629805	18.4706330575261	16.9835139297315	17.2721233050748	20.551194100156	26.3712216443878	23.5447624568248	22.4235432306369	24.6032562176439
ENSMUSG00000041126	712.13809630576	603.949970611638	586.086789371546	557.280725945763	530.16641513856	585.356230356149	669.900757512995	798.366071496787	686.680072561489	682.678239935872	688.634477798912	762.393357634458	595.829704621569	714.775496156752	-0.263812811456184	0.0061529708815119	0.070692973214901	H2az2	11	6377229	6394443	-	1633	protein_coding	H2A.Z histone variant 2 [Source:MGI Symbol;Acc:MGI:1924855]	-	669	562	633	624	575	599	685	938	700	592	709	668	27.7169894234953	23.3150375318989	22.4898583680513	21.2567199128845	20.5403796761909	22.7504912018996	25.9631577696254	31.1757421294537	26.7833962795941	26.2532505816272	26.9543382600028
ENSMUSG00000046229	1142.18860588353	1003.71756681721	890.703777844277	762.688685829618	809.541065202879	789.595716406959	1089.44444360507	1418.84460680719	1037.86788110008	1156.63222070216	969.333157747974	1088.80728021448	899.739236330745	1126.82159836283	-0.32572975547029	0.00616377480795686	0.0707509179358189	Scand1	2	156153766	156154667	-	803	protein_coding	SCAN domain-containing 1 [Source:MGI Symbol;Acc:MGI:1343132]	-	1073	934	962	854	878	808	1114	1667	1058	1003	998	954	90.4045522875786	78.7983854462091	69.5070284298349	59.1616353928183	63.7831227025846	62.4088177747954	85.8663043050373	112.673089132653	82.3235166692806	90.455077400619	77.1584722133806
ENSMUSG00000021876	19594.9747037316	18835.286716922	20955.6118544174	18207.1829484876	22903.1891339858	23117.1735981721	32717.5618140106	25637.9347607955	26394.0200461992	17412.9078091751	25095.821773439	26448.6581883547	20602.2364926194	25617.8173986624	-0.314365676636574	0.00617139941469339	0.0707722946883886	Rnase4	14	51328534	51343608	+	1637	protein_coding	ribonuclease, RNase A family 4 [Source:MGI Symbol;Acc:MGI:1926217]	-	18408	17527	22633	20387	24840	23656	33455	30122	26906	15100	25838	23174	760.788692863441	725.345457022177	802.163024043348	692.791401264501	885.176181114655	896.278074179018	1264.92705163669	998.700510010003	1026.96170736353	667.999026747324	979.893412882338
ENSMUSG00000042638	55.3530358862474	50.5082715636067	37.0355001182652	81.2701058670904	42.4133132110848	59.6105676990402	93.8839017828431	72.3466056260415	59.8392634660726	85.334779991984	111.696706554125	97.01113083672	54.3651323908891	86.6853980429644	-0.671012369586451	0.00618134899863773	0.0708202690310342	Gucy2c	6	136674282	136758763	-	3959	protein_coding	guanylate cyclase 2c [Source:MGI Symbol;Acc:MGI:106903]	-	52	47	40	91	46	61	96	85	61	74	115	85	0.888636126381179	0.804263471764759	0.58619712583248	1.27865604384621	0.677796211391153	0.955640338551466	1.50085541664419	1.16528879605477	0.962715856673477	1.35361070345407	1.80335389560243
ENSMUSG00000022178	96.867812800933	135.405153553499	59.2568001892243	119.672463584507	115.253568508383	73.2916815971806	122.244663779744	171.929580428946	135.374071447836	184.507632415101	144.72008066578	134.674275749799	99.9579133722877	148.908384081201	-0.575880090223555	0.00621156014635796	0.0711000761580322	Ajuba	14	54804929	54815015	-	3646	protein_coding	ajuba LIM protein [Source:MGI Symbol;Acc:MGI:1341886]	-	91	126	64	134	125	75	125	202	138	160	149	118	1.68861580981909	2.34120729610008	1.01843309760649	2.04449465377284	1.99995468597031	1.27583566776253	2.12200534921774	3.00700985900206	2.36491869179204	3.17797795435184	2.53710375356152
ENSMUSG00000028757	1606.30252216053	1603.36896112556	1601.78538011497	1378.91256548118	1275.16548197674	1477.56030099916	1916.79632806638	1932.93107502047	1767.71070107972	1563.70218471798	1863.87808589014	1560.16724533878	1490.51586864302	1767.53093668558	-0.246858467044359	0.0062475606885051	0.0713004085736199	Ddost	4	138032041	138039939	+	2120	protein_coding	dolichyl-di-phosphooligosaccharide-protein glycotransferase [Source:MGI Symbol;Acc:MGI:1194508]	-	1509	1492	1730	1544	1383	1512	1960	2271	1802	1356	1919	1367	48.1570086205889	47.6781011079615	47.3455795828474	40.5143877492978	38.0551226706454	44.2350039567877	57.2233575334559	58.1408558172701	53.1095617227008	46.3203028739523	56.1963019749472
ENSMUSG00000036833	1536.04674584337	1850.53709856448	1884.18106851674	1691.48989573922	1658.72935797264	1664.20978346665	2011.65818715946	2126.13906886884	2598.59358887912	1937.33014035856	2042.59281637674	1678.86321718606	1714.19899168385	2065.86283647146	-0.269543308025269	0.00625221892303586	0.0713004085736199	Pnpla7	2	24866045	24944069	+	7496	protein_coding	patatin-like phospholipase domain containing 7 [Source:MGI Symbol;Acc:MGI:2385325]	-	1443	1722	2035	1894	1799	1703	2057	2498	2649	1680	2103	1471	13.0239546792317	15.5628652554614	15.7508512776232	14.0555628668624	14.0000115029892	14.0907857105296	16.9846984014737	18.0868527563955	22.0803611343202	16.2303268445106	17.4171991866585
ENSMUSG00000073002	137.318108256268	127.882645022749	156.47498799967	128.603244449022	117.097625604517	130.947804453629	268.938260315436	208.528451510355	133.412128383375	142.993415121703	209.795553179922	165.489576133228	133.054069297643	188.19289744067	-0.502229635569764	0.00629528102599353	0.0715583823122485	Vamp5	6	72345777	72357451	-	2707	protein_coding	vesicle-associated membrane protein 5 [Source:MGI Symbol;Acc:MGI:1858622]	-	129	119	169	144	127	134	275	245	136	124	216	145	3.22409312565896	2.97813714704419	3.62216011431347	2.95918475897875	2.73679502830015	3.07020010927095	6.28778326824725	4.91222188303659	3.13909489310385	3.31727129911869	4.95375038531679
ENSMUSG00000069379	67.0623319391075	68.7772208525708	35.1837251123519	22.3269521612886	28.5828849900789	22.4761156898021	84.1043286804636	103.838657486789	51.0105196759963	64.5776713452852	70.9031267691404	71.9023675613336	40.7348717908666	74.389445253168	-0.877723951590945	0.00630748422917195	0.0715865795295481	Gm4950	18	51998339	51998953	-	615	processed_pseudogene	predicted pseudogene 4950 [Source:MGI Symbol;Acc:MGI:3649015]	-	63	64	38	25	31	23	86	122	52	56	73	63	6.93061153013178	7.05002807202448	3.58490520343455	2.26132371910441	2.94044719787292	2.31954531007546	8.65518711257647	10.7667557707673	5.28301713932175	6.59417506918437	7.36913254586597
ENSMUSG00000097043	0	0	0	1.78615617290309	0	0	0	21.278413419424	6.86680072561489	0	10.6840328008294	1.14130742160847	0.297692695483848	6.66175906124612	-4.26343242645245	0.00631773380357175	1	Gm10556	18	4812486	4850959	+	3906	lncRNA	predicted gene 10556 [Source:MGI Symbol;Acc:MGI:3642809]	-	0	0	0	2	0	0	0	25	7	0	11	1	0	0	0	0.0284836474603013	0	0	0	0.34738248423096	0.111974618854524	0	0.174835278611701
ENSMUSG00000027531	1426.40515553022	1525.99458766642	1371.23939187877	1427.13878214957	1419.92396402327	1353.4530534946	1652.74785430213	1674.18556784028	1452.81883923366	1610.98226552435	1755.09520646352	1596.68908283025	1420.69248912381	1623.75313603236	-0.193131202786818	0.00632494269832644	0.071663234521075	Impa1	3	10377016	10396499	-	5437	protein_coding	inositol (myo)-1(or 4)-monophosphatase 1 [Source:MGI Symbol;Acc:MGI:1933158]	-	1340	1420	1481	1598	1540	1385	1690	1967	1481	1397	1807	1399	16.6744527122555	17.6935508877224	15.803923568852	16.3499070180191	16.5229730645187	15.7993994969214	19.2389115181003	19.6356450936903	17.0196065977821	18.6073546387356	20.6332406415796
ENSMUSG00000025017	1030.41805265168	864.013836960421	923.109840447759	1085.08987503862	1046.50240205611	1139.44134323083	1595.04837299809	1401.82187607165	2120.86045268277	929.457198291069	1217.97973929455	971.252615788808	1014.76255839757	1372.73670918782	-0.436307643593667	0.00637434293679859	0.0720389006040082	Pik3ap1	19	41260816	41373541	-	5572	protein_coding	phosphoinositide-3-kinase adaptor protein 1 [Source:MGI Symbol;Acc:MGI:1933177]	-	968	804	997	1215	1135	1166	1631	1647	2162	806	1254	851	11.7535855471178	9.77531878279013	10.3813359561525	12.1300618521737	11.882602269963	12.9788909329412	18.117404424691	16.0428912036604	24.2436705469531	10.4754212389883	13.9718866118688
ENSMUSG00000032399	8814.9709648849	8598.22725064718	8298.72968900027	8146.65830461098	8040.08893914476	8358.18336934248	8943.41960212604	10009.365672497	8980.79437757205	8940.54796321422	9764.23470424888	9371.27523882715	8376.14308627176	9334.9395930809	-0.156516935083552	0.00638001456061089	0.0720389006040082	Rpl4	9	64080657	64085948	+	2007	protein_coding	ribosomal protein L4 [Source:MGI Symbol;Acc:MGI:1915141]	-	8281	8001	8963	9122	8720	8553	9145	11760	9155	7753	10053	8211	279.152508757667	270.074067962325	259.104657161856	252.836948757097	253.452114900315	264.314652797846	282.026204672453	318.024146783379	285.013064609939	279.749921493546	310.968883103714
ENSMUSG00000049600	235.250402516552	298.751053078355	307.394650981601	246.489551860626	378.031704707495	205.216708472106	332.505485480903	409.396674189717	328.625463297284	419.754863744354	528.373985786471	288.750777666943	278.522345269456	384.567875027612	-0.465538937855128	0.00638340996720542	0.0720389006040082	Zbtb45	7	12737825	12743961	-	4210	protein_coding	zinc finger and BTB domain containing 45 [Source:MGI Symbol;Acc:MGI:2685003]	ZBTB	221	278	332	276	410	210	340	481	335	364	544	253	3.55153665165276	4.47351283949683	4.57535907261699	3.64690820029247	5.68104942873079	3.09376512234065	4.99861797834541	6.20101993366601	4.97183266092071	6.2613336909892	8.0220511650178
ENSMUSG00000032515	228.863513760446	227.824544074141	226.842438224374	190.225632414179	151.212681882998	208.148375735993	396.072710646369	375.351212718639	265.843285234519	185.660805117695	209.795553179922	325.272615158414	205.519531015355	292.999363675926	-0.513737618110532	0.00639283125853268	0.0720389006040082	Csrnp1	9	119800229	119813724	-	3473	protein_coding	cysteine-serine-rich nuclear protein 1 [Source:MGI Symbol;Acc:MGI:2387989]	CSRNP	215	212	245	213	164	213	405	441	271	161	216	285	4.18831946019715	4.13539564151378	4.09289399069135	3.41171437470869	2.75464648372665	3.80386381769094	7.21777543061419	6.89182042824189	4.87549032938193	3.35713383075198	3.86115816097108
ENSMUSG00000032125	185.219773927059	229.973832225784	203.695250650458	232.200302477401	163.19905300787	238.442270796161	306.100638104478	427.270541462033	282.519801282441	211.030604574771	246.704030128242	253.37024759708	208.788413847455	287.832643858174	-0.465843062683827	0.00646205055639191	0.0727469339446429	Robo4	9	37313193	37326411	+	5302	protein_coding	roundabout guidance receptor 4 [Source:MGI Symbol;Acc:MGI:1921394]	-	174	214	220	260	177	244	313	502	288	183	254	222	2.22032039374001	2.73438736137054	2.40742159872488	2.72791899422705	1.94742324700634	2.85430411190136	3.65390910677719	5.13882869611374	3.3939587228211	2.49953330670823	2.97414827950611
ENSMUSG00000092981	160.736700361988	163.345899524856	214.805900685938	145.571728091602	133.694139469724	160.264477092502	220.040394803538	365.137574277315	205.023050236216	167.210041876185	270.014647148233	180.326572614138	163.069807537768	234.625380159271	-0.527986426963719	0.00647491031124062	0.0728249527863162	Mir5125	17	24042265	24042343	+	79	miRNA	microRNA 5125 [Source:MGI Symbol;Acc:MGI:4950450]	-	151	152	232	163	145	164	225	429	209	145	278	158	129.31710663968	130.347433578491	170.384501807476	114.77792213753	107.06997912222	128.755828274194	176.282236782863	294.734074370242	165.300050633574	132.919430785379	218.467243170922
ENSMUSG00000081214	7.45137021545639	7.52250853074993	4.62943751478315	2.67923425935463	3.68811419226824	2.93166726388722	3.91182924095179	16.1715941987622	10.7906868545377	16.1444178363213	32.0520984024881	11.4130742160847	4.81705532941659	15.0806167915243	-1.66075382499287	0.00650179490455412	1	Rpl35a-ps2	1	181069553	181069885	-	333	processed_pseudogene	ribosomal protein L35A, pseudogene 2 [Source:MGI Symbol;Acc:MGI:3705461]	-	7	7	5	3	4	3	4	19	11	14	33	10	1.42219756123825	1.42409773132814	0.871154062001046	0.501158229639356	0.700716856220805	0.558762383743207	0.74347930361541	3.09677401618215	2.06396459618339	3.04460785851981	6.15231169601176
ENSMUSG00000038900	1959.71036666503	2125.64598197477	2101.76463171155	1817.41390592889	1725.11541343347	1866.49482467487	2245.38998430633	2462.33800089574	2191.49040300338	2004.21415710903	2228.10647682751	2305.44099164911	1932.69085406476	2239.49666896518	-0.213125832481004	0.00658930571392888	0.0735800220156609	Rpl12	2	32851571	32855357	+	3598	protein_coding	ribosomal protein L12 [Source:MGI Symbol;Acc:MGI:98002]	-	1841	1978	2270	2035	1871	1910	2296	2893	2234	1738	2294	2020	34.6177432506073	37.2435539222121	36.6044506396448	31.4630702340428	30.3346812291814	32.924739571261	39.4969763901214	43.6402692606329	38.7950040507843	34.9813185211978	39.5822865329794
ENSMUSG00000062461	0	2.14928815164284	0	0	0.92202854806706	0	0.977957310237949	16.1715941987622	0.980971532230699	4.61269081037751	7.77020567333046	4.56522968643388	0.511886116618316	5.84644153522879	-3.58457182106428	0.00661011147950701	1	Rpl27a-ps4	13	99040732	99041178	+	447	processed_pseudogene	ribosomal protein L27A, pseudogene 4 [Source:MGI Symbol;Acc:MGI:3648523]	-	0	2	0	0	1	0	1	19	1	4	8	4	0	0.303115720378569	0	0	0.130502635974009	0	0.13846678305589	2.30699272346456	0.139780396690883	0.648037339013805	1.11109472972513
ENSMUSG00000112793	6.38688875610547	27.9407459713569	6.4812125206964	8.93078086451543	4.6101427403353	13.6811138981404	34.2285058583282	22.1295499562009	33.3530320958438	14.9912451337269	28.1669955658229	30.8153003834287	11.3384807918583	27.2807714988919	-1.27854299337232	0.00661157165602506	1	Gm32872	10	68365924	68369766	+	205	lncRNA	predicted gene, 32872 [Source:MGI Symbol;Acc:MGI:5592031]	-	6	26	7	10	5	14	35	26	34	13	29	27	1.9801747228948	8.59222171277983	1.98113182295067	2.71358846292529	1.42279703122883	4.23569143578997	10.5673796141922	6.88366352557255	10.3628413117465	4.59237192318197	8.78239084233342
ENSMUSG00000021495	1745.7495933355	1838.71601373045	1865.66331845761	1766.50845500115	1732.49164181801	1666.16422830924	2011.65818715946	2458.08231821186	1840.30259446479	1938.48331306115	2029.96623215758	2053.21205147364	1769.21554177533	2055.28411608808	-0.21669687213062	0.00664080787652438	0.0740130692735685	Fam193b	13	55687129	55718933	-	11540	protein_coding	family with sequence similarity 193, member B [Source:MGI Symbol;Acc:MGI:2385851]	-	1640	1711	2015	1978	1879	1705	2057	2888	1876	1681	2090	1799	9.61488650833666	10.0445431504669	10.1306762535943	9.53494788415579	9.49834146350415	9.16365467377128	11.0326949061912	13.5828694630048	10.1573593426228	10.5489556498342	11.2436961584825
ENSMUSG00000030826	1031.48253411103	1114.40590662681	1063.84474089717	828.776464227032	951.533461605206	839.434059893042	1292.85956413457	1248.6172994518	1086.91645771161	1037.85543233494	1282.08393609953	1092.23120247931	971.579527893382	1173.42731536863	-0.273368569066384	0.00667264441458356	0.0742896885981461	Bcat2	7	45219577	45239135	+	3900	protein_coding	branched chain aminotransferase 2, mitochondrial [Source:MGI Symbol;Acc:MGI:1276534]	-	969	1037	1149	928	1032	859	1322	1467	1108	900	1320	957	16.8099063174973	18.0135843472515	17.0932489097771	13.2367453637669	15.436253329578	13.6608806480849	20.9806999944486	20.4157647964799	17.7512501926855	16.7118859926445	21.0125107156094
ENSMUSG00000062997	1324.21493543253	1201.45207676835	823.113990128443	868.0719000309	970.896061114614	848.229061684704	1280.14611910148	1322.66617815139	1120.26948980746	1211.98451042669	1418.06253538281	1218.91632627785	1005.99633752659	1262.00752652461	-0.328056248807445	0.00669724890432816	0.0742896885981461	Rpl35	2	38891592	38895636	-	1241	protein_coding	ribosomal protein L35 [Source:MGI Symbol;Acc:MGI:1913739]	-	1244	1118	889	972	1053	868	1309	1554	1142	1051	1460	1068	67.8195215998698	61.0317763079405	41.5622618940538	43.5704784143831	49.4975150920566	43.3808526582518	65.2861398082285	67.9640702083198	57.4973877682366	61.3307811757994	73.0381388510487
ENSMUSG00000037997	131.995700959513	162.271255449034	124.994812899145	133.961712967732	145.680510594595	163.196144356389	246.445242179963	170.227307355392	153.031559027989	183.354459712506	240.876375873244	176.902650349313	143.683356204401	195.139599083068	-0.44270838308476	0.00670796813673213	0.0742896885981461	Parp11	6	127423803	127471224	+	7026	protein_coding	poly (ADP-ribose) polymerase family, member 11 [Source:MGI Symbol;Acc:MGI:2141505]	-	124	151	135	150	158	167	252	200	156	159	248	155	1.19404216377231	1.45597792331286	1.11479450205685	1.18762945110949	1.31182453292063	1.4742069893891	2.21996190016335	1.5449769238897	1.38729954768697	1.63883994433988	2.19135207369785
ENSMUSG00000036817	370.439547854117	368.602918006747	347.207813608736	355.445078407714	371.577504871025	328.346733555369	439.102832296839	396.629626138063	417.893872730278	454.350044822185	651.726000850592	383.479293660446	356.936599383951	457.196945083067	-0.357584748021908	0.00673777515808128	0.0745525716140129	Sun1	5	139186392	139235595	+	7596	protein_coding	Sad1 and UNC84 domain containing 1 [Source:MGI Symbol;Acc:MGI:1924303]	-	348	343	375	398	403	336	449	466	426	394	671	336	3.09956259284085	3.0591104110165	2.86428023939917	2.91471409544596	3.09490196774539	2.74349682254958	3.65859646651742	3.32966934316617	3.50411567912997	3.75628752213116	5.48411038621586
ENSMUSG00000050447	0	0	0	2.67923425935463	1.84405709613412	1.95444484259148	3.91182924095179	20.427276882647	1.9619430644614	13.8380724311325	0	13.6956890593016	1.07962269968004	8.97246844641573	-3.02552181012076	0.00674151107873766	1	Lypd6	2	49956441	50083581	+	3729	protein_coding	LY6/PLAUR domain containing 6 [Source:MGI Symbol;Acc:MGI:2443848]	-	0	0	0	3	2	2	4	24	2	12	0	12	0	0	0	0.0447534702252361	0.0312870358167777	0.0332650172139962	0.0663927616261549	0.349316423724828	0.0335113099065833	0.233043194319526	0
ENSMUSG00000032714	76.6426650732657	77.3743734591422	49.997925159658	61.6223879651565	69.1521411050295	85.0183506527295	133.002194192361	138.735255494644	107.906868545377	70.3435348582571	103.926500880795	81.0328269342014	69.9679739024969	105.824530150939	-0.603398487728948	0.0067467938833118	0.0745851687442264	Syde1	10	78420337	78427798	-	3288	protein_coding	synapse defective 1, Rho GTPase, homolog 1 (C. elegans) [Source:MGI Symbol;Acc:MGI:1918959]	-	72	72	54	69	75	87	136	163	110	61	107	71	1.48151758464757	1.48349701104986	0.95286449774348	1.16738773747197	1.33062678559266	1.64110959239907	2.56011942686547	2.6906421568759	2.09032910744851	1.34352449231215	2.02032199771985
ENSMUSG00000035811	1500.91885768479	1436.79912937324	1436.05151708573	1335.15173924506	1587.73315977148	1494.17308216119	1943.2011754428	1565.24009113283	1263.49133351314	1974.23166684158	2112.52466743672	2007.5597546093	1465.13791422025	1811.04144816273	-0.305466349245177	0.00677513390320732	0.0748311102510723	Ugt2b35	5	87148719	87161134	+	3359	protein_coding	UDP glucuronosyltransferase 2 family, polypeptide B35 [Source:MGI Symbol;Acc:MGI:3576100]	-	1410	1337	1551	1495	1722	1529	1987	1839	1288	1712	2175	1759	28.3997967476799	26.9654325709032	26.7898936233692	24.7587682100336	29.9054230422203	28.2323885104237	36.6134782898565	29.7147357366343	23.9585014793754	36.9097682497068	40.199243584661
ENSMUSG00000037287	1279.5067141398	1184.2577715552	1139.76751613961	1216.372353747	1268.71128214027	1195.14302124469	1780.8602619433	1583.96509494192	1371.39820205852	1063.22523179202	1766.75051497351	1412.93858795129	1213.95977649443	1496.52298227676	-0.30253762223861	0.00681165707277236	0.0750994364163287	Tbcel	9	42323612	42419105	-	8483	protein_coding	tubulin folding cofactor E-like [Source:MGI Symbol;Acc:MGI:1925543]	-	1202	1102	1231	1362	1376	1223	1821	1861	1398	922	1819	1238	9.58652311423841	8.80071821078397	8.41933482394565	8.93152227671073	9.46227953716913	8.94184485209142	13.2865921654267	11.9068546746142	10.2970185753286	7.87098375212529	13.3122619809677
ENSMUSG00000024357	1167.73616090795	1286.34895875824	1166.61825372535	1072.5867818283	980.116346595285	923.475188124476	1149.09983952959	1437.56961061628	1361.58848673621	1266.18362744863	1329.67644584867	1337.61229812513	1099.4802816566	1313.62171805075	-0.257390931976015	0.00686697392808984	0.0753710221490611	Sil1	18	35399449	35632833	-	3436	protein_coding	endoplasmic reticulum chaperone SIL1 homolog (S. cerevisiae) [Source:MGI Symbol;Acc:MGI:1932040]	-	1097	1197	1260	1201	1063	945	1175	1689	1388	1098	1369	1172	21.6002906751162	23.600814061414	21.275833605029	19.444093350248	18.0470788742858	17.0580268459673	21.1659534722148	26.6794358087654	25.2400437140001	23.1417792645525	24.7353987991917
ENSMUSG00000059355	646.140245826004	559.889563502959	509.238126626146	481.369088597382	465.624416773865	539.426776555249	638.606123585381	607.711487258748	575.83028941942	682.678239935872	668.237687906419	712.175831083685	533.614702980268	647.539943198254	-0.2795495654749	0.00691221381391243	0.0756647148506885	Wdr83os	8	85807369	85808968	+	1031	protein_coding	WD repeat domain 83 opposite strand [Source:MGI Symbol;Acc:MGI:3041257]	-	607	521	550	539	505	552	653	714	587	592	688	624	39.8323701331093	34.2345833034936	30.9508955296783	29.0822460922338	28.5732420287031	33.2070696185391	39.2019474034596	37.5871756412018	35.5740431690824	41.5825006787558	41.4284225025153
ENSMUSG00000033916	1620.14078113209	1520.62136728731	1449.93982963008	1435.17648492763	1304.67039551489	1287.97915126779	1692.84410402189	1675.88784091383	1780.46333099872	1665.18138254628	1508.39117633527	1672.01537265641	1436.42133495996	1665.7972012454	-0.214118381448167	0.00692988968552602	0.0757906546016301	Chmp2a	7	12765937	12768734	-	1162	protein_coding	charged multivesicular body protein 2A [Source:MGI Symbol;Acc:MGI:1916203]	-	1522	1415	1566	1607	1415	1318	1731	1969	1815	1444	1553	1465	88.6165110858298	82.4966474690391	78.1906502485683	76.9321011431837	71.0357743259385	70.3492420110703	92.2027905825959	91.9686337806081	97.594263973577	89.9929787303275	82.9724571345326
ENSMUSG00000001524	253.346587325517	277.258171561926	277.766250886989	258.992645070948	205.612366218954	217.92059994895	384.337222923514	294.493241724828	258.976484508904	294.059039161566	357.429460973201	328.696537423239	248.482770168881	319.665331119209	-0.363891843750039	0.00695186885317658	0.075963392575369	Gtf2h4	17	35978622	35984631	-	3313	protein_coding	general transcription factor II H, polypeptide 4 [Source:MGI Symbol;Acc:MGI:1338799]	-	238	258	300	290	223	223	393	346	264	255	368	288	4.86028396871099	5.27575061400224	5.25374529392723	4.86938829220974	3.92654188244044	4.17477974186405	7.34216669067651	5.66832587091482	4.97893300715293	5.57399155504743	6.89596433220889
ENSMUSG00000025854	919.711980879188	1184.2577715552	1002.73616570203	1017.21594046831	1220.76579764079	972.336309189263	1497.2526419743	1449.48552213116	1111.44074601738	1097.82041286985	1620.0878828894	1109.35081380343	1052.83732757246	1314.23966994759	-0.320543932506859	0.00698543578731087	0.0761946024331724	Fam20c	5	138740269	138795832	+	6590	protein_coding	FAM20C, golgi associated secretory pathway kinase [Source:MGI Symbol;Acc:MGI:2136853]	-	864	1102	1083	1139	1324	995	1531	1703	1133	952	1668	972	8.87022121697335	11.3287545648074	9.53481425693461	9.61470922838758	11.7200476545107	9.36456926745348	14.3794707514082	14.025856144101	10.7423249900598	10.4616237250869	15.7137288714745
ENSMUSG00000042066	92.6098869635294	64.4786445492851	30.5542875975688	104.490136114831	76.528369489566	77.2005712823636	161.362956189262	157.460259303737	93.1922955619164	103.785543233494	121.409463645788	89.0219788854607	74.3103159995239	121.038749469943	-0.706121531919154	0.00703224788673296	0.0765013893222801	Tmcc2	1	132284053	132319019	-	5692	protein_coding	transmembrane and coiled-coil domains 2 [Source:MGI Symbol;Acc:MGI:1916125]	-	87	60	33	117	83	79	165	185	95	90	125	78	1.03409510959325	0.714121892177901	0.336370765542147	1.14345430926323	0.850628653772261	0.8608199829663	1.79420547861686	1.76403413162427	1.04282757299338	1.1450519214918	1.36337003740758
ENSMUSG00000002699	59.6109617236511	72.0011530800351	49.997925159658	56.2639194464472	83.9045978741025	95.7677972869827	187.767803565686	200.868222679362	72.5918933850717	57.6586351297189	181.628557614099	59.3479859236405	69.5910590951461	126.643849716263	-0.867405232917413	0.00704976205024179	0.0766240508859024	Lcp2	11	33996920	34042295	+	4459	protein_coding	lymphocyte cytosolic protein 2 [Source:MGI Symbol;Acc:MGI:1321402]	-	56	67	54	63	91	98	192	236	74	50	187	52	0.849682507992534	1.01794266759562	0.702628048571555	0.785960865635348	1.19050363837514	1.36313460649442	2.665120697239	2.87259683412286	1.03692665659139	0.812044994783501	2.60359097788163
ENSMUSG00000092274	4159.99354314337	4192.18653977936	3731.32663691522	3463.35681925908	4316.01563350191	2845.6716908132	5335.73508465825	3880.33147116615	4767.5216466412	4882.5332227846	5677.10652007706	3760.60795419991	3784.75847723535	4717.30598325453	-0.317837475583765	0.00706982586198858	0.0767620922787023	Neat1	19	5874736	5895898	-	21163	lncRNA	nuclear paraspeckle assembly transcript 1 (non-protein coding) [Source:MGI Symbol;Acc:MGI:1914211]	-	3908	3901	4030	3878	4681	2912	5456	4559	4860	4234	5845	3295	12.4934805832501	12.4877646851337	11.048339457211	10.1936194875064	12.902926287883	8.53422873988018	15.9569636371858	11.6920996235856	14.3487090383786	14.4884252202293	17.1465167200644
ENSMUSG00000025935	1574.36807838	1800.02882700088	2011.0276564218	1617.36441456374	1736.17975601027	1891.90260762856	2301.13355098989	1978.89244800643	2048.2685592977	1929.2579314404	2118.35232169172	1993.86406555	1771.81189000087	2061.62814616269	-0.218607602313332	0.00707496242138829	0.0767620922787023	Tram1	1	13634922	13660134	-	3162	protein_coding	translocating chain-associating membrane protein 1 [Source:MGI Symbol;Acc:MGI:1919515]	-	1479	1675	2172	1811	1883	1936	2353	2325	2088	1673	2181	1747	31.6455342140042	35.8871470177805	39.8535626405989	31.8606351930212	34.7388359272484	37.9746366909804	46.0588602837248	39.9081171590038	41.2593536767494	38.3161299234687	42.8215539876713
ENSMUSG00000039167	193.735625601866	145.076950235892	129.624250413928	126.817088276119	166.887167200138	240.396715638752	336.417314721854	332.794385879791	171.670018140372	185.660805117695	237.962548745745	208.85925815435	167.089632894449	245.560721793301	-0.558012946272885	0.00726324175469265	0.0784027237047834	Adgrl4	3	151143524	151250723	+	5704	protein_coding	adhesion G protein-coupled receptor L4 [Source:MGI Symbol;Acc:MGI:2655562]	-	182	135	140	142	181	246	344	391	175	161	245	183	2.15872834593282	1.60339394690084	1.42402532855851	1.3848625553253	1.8510828837218	2.67488878865568	3.73277705065535	3.72046640611358	1.91695679017256	2.04406132436915	2.66658352309448
ENSMUSG00000118346	287.409994024746	233.197764453248	233.323650745071	200.942569451597	240.649451045503	196.421706680444	294.365150381623	301.302334019043	329.606434829515	274.455103217462	262.244441474903	300.163851883028	231.990856066768	293.689552634262	-0.341893755293685	0.00726447643511183	0.0784027237047834	Tmem179b	19	8749889	8751831	-	845	protein_coding	transmembrane protein 179B [Source:MGI Symbol;Acc:MGI:1914956]	-	270	217	252	225	261	201	301	354	336	238	270	263	21.6178838091177	17.3975868408289	17.3026660986698	14.81233939082	18.0181669008044	14.7533107025973	22.0476807808531	22.7377087870187	24.8448489228367	20.3970711089712	19.8369856406103
ENSMUSG00000031853	147.962922849777	160.121967297391	166.659750532193	164.326367907084	219.44279443996	188.603927310078	310.01246734543	304.706880166151	251.128712251059	185.660805117695	303.038021259888	140.380812857842	174.519621722747	249.154616499677	-0.515600865457932	0.00727471891507615	0.0784266946688436	Map3k21	8	126637189	126674179	+	5693	protein_coding	mitogen-activated protein kinase kinase kinase 21 [Source:MGI Symbol;Acc:MGI:2385307]	-	139	149	180	184	238	193	317	358	256	161	312	123	1.65188473355838	1.77309119307692	1.83442734854533	1.79793705992521	2.43872359577216	2.10264650394005	3.44644382438724	3.4130448063193	2.80965226666627	2.04801085441799	3.40237386673074
ENSMUSG00000060036	4695.42771719687	4735.95644214499	4439.63057667704	4212.64933379193	4067.98995407187	4890.02099616389	5200.77697584541	5323.0079010031	5058.87019171371	4904.44350413389	5149.70380999976	4889.36099417069	4506.94583667443	5087.69389614443	-0.175178557147119	0.00750575493707013	0.0803011168441597	Rpl3	15	79961992	79976069	-	3175	protein_coding	ribosomal protein L3 [Source:MGI Symbol;Acc:MGI:1351605]	-	4411	4407	4795	4717	4412	5004	5318	6254	5157	4253	5302	4284	93.9938527061015	94.0340862881314	87.6221846418419	82.6456484983249	81.0622364009592	97.751563299484	103.671105346198	106.909006616969	101.486247264092	97.006138020716	103.672749719692
ENSMUSG00000025279	702.557763171602	595.352818005066	494.42392657884	626.047738602532	591.020299310985	940.087969286503	1606.78386072095	1946.5492596089	774.967510462252	689.597276151438	1037.32245738962	725.871520142987	658.248419159255	1130.18198074602	-0.780287419855583	0.00754488427112709	0.0804394692864435	Dnase1l3	14	14475200	14505240	+	5151	protein_coding	deoxyribonuclease 1-like 3 [Source:MGI Symbol;Acc:MGI:1314633]	-	660	554	534	701	641	962	1643	2287	790	598	1068	636	8.66879052635947	7.28625225811572	6.0147683018113	7.5704956331718	7.25927563147445	11.5833362183784	19.7423632845447	24.097653846242	9.58273179643785	8.40731260640769	12.8720680351353
ENSMUSG00000041481	95.8033313415821	111.762983885428	107.402950342969	88.4147305587028	115.253568508383	91.8589076017997	269.916217625674	259.596643716972	113.792697738761	95.7133343153334	146.662632084112	98.1524382583284	101.749412039811	163.972327289864	-0.691833652885727	0.00755658441827973	0.0804943363619355	Serpina3g	12	104202504	104208198	+	2105	protein_coding	serine (or cysteine) peptidase inhibitor, clade A, member 3G [Source:MGI Symbol;Acc:MGI:105046]	-	90	104	116	99	125	94	276	305	116	83	151	86	2.89265428641401	3.34708874322065	3.19723887002151	2.6162602306446	3.4640545297139	2.7696563952383	8.11540330601961	7.86407933375523	3.44317963383166	2.85544338655002	4.4534181099915
ENSMUSG00000020048	6316.63297978831	6815.39272885944	7594.12929925027	6938.32365364204	6287.31266926928	6857.16973023222	7972.30799305976	7195.50828191241	8105.76777082226	7563.65975631653	7898.41406694041	7396.8133994445	6801.49351017359	7688.74521141598	-0.176847842793149	0.00758013836702238	0.0806054194145185	Hsp90b1	10	86526073	86541373	-	4032	protein_coding	heat shock protein 90, beta (Grp94), member 1 [Source:MGI Symbol;Acc:MGI:98817]	-	5934	6342	8202	7769	6819	7017	8152	8454	8263	6559	8132	6481	99.5710625479428	106.55938426246	118.023485630226	107.187080792055	98.6567884905568	107.939671822072	125.140179393803	113.799896465431	128.04747564037	117.805256525696	125.211860953923
ENSMUSG00000106037	203.315958736024	208.480950709355	141.660787952364	132.175556794828	168.731224296272	152.446697722136	237.643626387822	217.039816878124	189.327505720525	208.724259169582	304.009296969054	207.717950732742	167.80186270183	227.410409309641	-0.441632053243446	0.00760270795917188	0.0807056691050554	Gm4332	3	119503165	119503510	+	346	processed_pseudogene	predicted gene 4332 [Source:MGI Symbol;Acc:MGI:3782515]	-	191	194	153	148	183	156	243	255	193	181	313	182	37.3476595736733	37.9849552598103	25.6557389045614	23.7948768685415	30.8533125008957	27.963957910108	43.4693654402134	40.0003902622616	34.8525855575697	37.8834949332297	56.161262547172
ENSMUSG00000025197	2697.39601799521	5107.78329237921	3788.73166209853	3105.23250659202	2634.23556182759	2885.73781008633	4334.30679897459	5738.36253095025	5107.91876832525	3317.67786536403	6746.48107586917	4869.95876800334	3369.85280849648	5019.1176345811	-0.574857173134559	0.00761898121817532	0.0808085728166056	Cyp2c23	19	43993461	44017647	-	2158	protein_coding	cytochrome P450, family 2, subfamily c, polypeptide 23 [Source:MGI Symbol;Acc:MGI:1888897]	-	2534	4753	4092	3477	2857	2953	4432	6742	5207	2877	6946	4267	79.4440348549706	149.211522584528	110.015374089792	89.6295251411588	77.229923932832	84.8715525627894	127.116356709526	169.56548433965	150.761319244455	96.5463775117231	199.825984981685
ENSMUSG00000028393	3938.58139959837	4464.07149096218	4077.60856302099	3559.80925259585	3268.59120289773	3310.82956334997	4408.63155455267	4425.05885470341	4163.24318278709	4190.62960122797	4330.91838717256	5390.3949522568	3769.91524540418	4484.81275545008	-0.250566426205292	0.00764707983930552	0.0809667539537503	Alad	4	62427406	62438155	-	1871	protein_coding	aminolevulinate, delta-, dehydratase [Source:MGI Symbol;Acc:MGI:96853]	-	3700	4154	4404	3986	3545	3388	4508	5199	4244	3634	4459	4723	133.793205711358	150.410686263042	136.566040497543	118.511733870131	110.527223144818	112.310343201251	149.129391412684	150.815568951971	141.727908920139	140.656140756193	147.955906983593
ENSMUSG00000033762	26.6120364837728	53.732203791071	62.0344626980941	34.8300453716102	60.853884172426	27.3622277962808	88.0161579214154	59.5795575743871	53.9534342726884	93.4069889101447	103.926500880795	57.0653710804235	44.2374767188758	75.9913351066423	-0.778332195042843	0.00766232913976329	0.0810583346206483	Recql4	15	76587753	76594748	-	4342	protein_coding	RecQ protein-like 4 [Source:MGI Symbol;Acc:MGI:1931028]	-	25	50	67	39	66	28	90	70	55	81	107	50	0.38954381448011	0.780128552563452	0.895270302962015	0.499657755897921	0.886708605828009	0.399961651007344	1.28293843444	0.875000634163325	0.791455792870877	1.35096084371677	1.5298983713733
ENSMUSG00000020515	751.523910301744	900.551735538349	941.627590506892	849.317260215418	857.486549702366	810.11738725417	1006.31807223485	1138.82068620757	853.445233040708	1029.78322341678	1080.05858859293	952.991697043073	851.770738919823	1010.23625008932	-0.246372802185451	0.00768018017397952	0.0811767187694519	Cnot8	11	57994979	58009420	+	2636	protein_coding	CCR4-NOT transcription complex, subunit 8 [Source:MGI Symbol;Acc:MGI:1916375]	-	706	838	1017	951	930	829	1029	1338	870	893	1112	835	18.1203014443958	21.5369698850013	22.3843631101166	20.0693337932322	20.5808993933063	19.5055977957762	24.161455589809	27.5493181456358	20.6218507090733	24.5331669813618	26.1895481191241
ENSMUSG00000005947	4.25792583740365	6.44786445492852	5.55532501773977	0.893078086451543	5.53217128840236	10.7494466342532	18.581188894521	31.4920518607475	24.5242883057675	9.22538162075503	3.88510283666523	15.9783039025186	5.57263521986317	17.2810529034958	-1.64306363985923	0.0076904151776517	1	Itgae	11	72981409	73038272	+	4581	protein_coding	integrin alpha E, epithelial-associated [Source:MGI Symbol;Acc:MGI:1298377]	-	4	6	6	1	6	11	19	37	25	8	4	14	0.0590752846093914	0.0887313208966735	0.075990649023274	0.0121433231805214	0.0764042937529562	0.148930117998353	0.256712156405517	0.43837076084721	0.340983613407687	0.126467011804921	0.0542086164797131
ENSMUSG00000032519	524.78935946	506.157359711888	436.093013892572	508.161431190928	503.427587244615	492.520100333054	581.88459959158	611.116033405856	500.295481437656	608.875186969832	608.018593938108	616.306007668574	495.19147530551	587.749317168601	-0.247340500587721	0.00772070435506636	0.0813954428231116	Slc25a38	9	119939440	119953570	+	2747	protein_coding	solute carrier family 25, member 38 [Source:MGI Symbol;Acc:MGI:2384782]	-	493	471	471	569	546	504	595	718	510	528	626	540	12.1421161490937	11.6157761960944	9.9479007314474	11.522625637347	11.5947340156857	11.379469528988	13.4063771224826	14.1861952105657	11.6001954982237	13.9194740266365	14.147649684253
ENSMUSG00000109482	1651.01074345326	1816.1484881382	1793.44409322699	1662.91139697277	1671.63775764558	1765.84091528141	2209.20556382753	1897.18334047584	1957.03820680024	1766.66058037459	2289.29684650499	1890.00509018363	1726.83223245304	2001.5649380278	-0.213372929353446	0.00772891409321437	0.0814121122580265	Gm4756	12	72622776	72696435	-	3391	protein_coding	predicted gene 4756 [Source:MGI Symbol;Acc:MGI:3644906]	-	1551	1690	1937	1862	1813	1807	2259	2229	1995	1532	2357	1656	30.944974639635	33.7633011863141	33.1414134017091	30.5456753813982	31.1886675677772	33.0506878926751	41.2326803086686	35.6765150930376	36.7594413019891	32.71738144397	43.1519490655068
ENSMUSG00000028671	127.737775122109	138.629085780963	88.8852002838364	81.2701058670904	82.9825693260354	69.3827919119977	172.120486601879	187.250038090931	248.185797654367	106.091888638683	114.610533681624	101.576360523154	98.1479213820054	154.972517531773	-0.66386145199128	0.0077818273779238	0.0818992320956814	Gale	4	135691038	135695489	+	2370	protein_coding	galactose-4-epimerase, UDP [Source:MGI Symbol;Acc:MGI:1921496]	-	120	129	96	91	90	71	176	220	253	92	118	89	3.42561871893192	3.68746029202309	2.35013105941346	2.13594906227305	2.21524094735628	1.85806174948532	4.59639609981983	5.03818930547423	6.67000204310911	2.8111695706333	3.09102334462455
ENSMUSG00000020484	2446.1783935884	2656.52015543055	3088.76070986331	2728.35355410946	2990.13858138148	2754.7900056327	4349.9541159384	2810.45284443752	3128.3182162837	2935.97770080529	3605.37543242533	3334.90028593995	2777.45690000098	3360.8297659717	-0.274938375110394	0.00786306343426797	0.0822607709537302	Xbp1	11	5470659	5475893	+	3248	protein_coding	X-box binding protein 1 [Source:MGI Symbol;Acc:MGI:98970]	TF_bZIP	2298	2472	3336	3055	3243	2819	4448	3302	3189	2546	3712	2922	47.8674317635729	51.5606559677945	59.5908001002597	52.3230484796348	58.2448773593839	53.8305969010785	84.7621343015924	55.1773952858009	61.3468532069302	56.7662153719772	70.9513348838759
ENSMUSG00000021903	38.3213325366328	52.6575597152495	35.1837251123519	79.4839496941874	27.6608564420118	52.7700107499701	113.443047987602	74.9000152363724	76.5157795139945	43.8205626985864	115.581809390791	70.7610601397251	47.6795723750673	82.5037124945118	-0.792301372034927	0.0078850481662222	0.0824205630447158	Galnt15	14	31750946	31784154	+	6326	protein_coding	polypeptide N-acetylgalactosaminyltransferase 15 [Source:MGI Symbol;Acc:MGI:1926004]	-	36	49	38	89	30	54	116	88	78	38	119	62	0.385016583806607	0.524750523510259	0.348516708838484	0.782633915682453	0.276642483150721	0.529437516306794	1.13496358441575	0.755011612644573	0.770405202501472	0.435012734764799	1.16784820499266
ENSMUSG00000068706	431.114991037119	472.843393361424	458.314313963531	411.708997854161	332.852305852209	343.005069874805	456.706063881122	618.776262236849	480.676050793042	477.413498874073	514.776125858143	509.023110037378	408.306511990542	509.561851946768	-0.321129107842361	0.00795700865928232	0.0828959679014322	Gm10250	15	5150136	5150617	-	482	processed_pseudogene	predicted pseudogene 10250 [Source:MGI Symbol;Acc:MGI:3642408]	-	405	440	495	461	361	351	467	727	490	414	530	446	56.8478583569642	61.8431534066981	59.5836845684409	53.2049123835591	43.6904955585434	45.1658531805375	59.9684699089917	81.8629742685689	63.5188802639087	62.2015009767721	68.2648994863018
ENSMUSG00000039648	1974.61310709594	2783.32815637748	2613.78042084656	2259.4875587224	1958.38863609444	2065.8481986192	3246.81826998999	2518.51301232302	3112.62267176801	2392.83335788334	3688.90514341363	2266.63653931442	2275.907679626	2871.05483244873	-0.335368993171814	0.00795752696269244	0.0828959679014322	Kyat1	2	30075136	30095859	-	2923	protein_coding	kynurenine aminotransferase 1 [Source:MGI Symbol;Acc:MGI:1917516]	-	1855	2590	2823	2530	2124	2114	3320	2959	3173	2075	3798	1986	42.9359643487751	60.0284233585154	56.0339525399002	48.1492526957305	42.3889348845472	44.8565954139167	70.3011442785711	54.9434968853744	67.8258193017366	51.4087267250068	80.6667887967296
ENSMUSG00000029675	24.483073565071	17.1943052131427	22.2213000709591	12.5030932103216	35.0370848265483	31.2711174814637	30.3166766173764	59.5795575743871	41.2008043536893	31.1356629700482	68.9605753508078	37.6631449130795	23.7849957279177	44.8094036298981	-0.917502942307432	0.00799535907420479	0.0831490263754303	Eln	5	134731447	134776177	-	8098	protein_coding	elastin [Source:MGI Symbol;Acc:MGI:95317]	-	23	16	24	14	38	32	31	70	42	27	71	33	0.192156989759796	0.133853027423285	0.171950191739006	0.0961718805704568	0.27373645031545	0.245088168320063	0.23693927053661	0.4691593916445	0.324059912012179	0.241453526937442	0.54431361813544
ENSMUSG00000052302	95.8033313415821	198.809154026963	159.25265050854	58.9431537058019	200.080194930552	99.6766869721657	171.142529291641	219.593226488455	146.164758302374	307.897111592699	299.152918423223	183.750494878964	135.427528580934	221.283506496226	-0.708514360540299	0.00802041134025569	0.083338994992403	Tbc1d30	10	121099725	121187183	-	6733	protein_coding	TBC1 domain family, member 30 [Source:MGI Symbol;Acc:MGI:1921944]	-	90	185	172	66	217	102	175	258	149	267	308	161	0.904357236432719	1.86144025669878	1.48213931546627	0.545297072677547	1.8800869132397	0.939597164524073	1.60872777432749	2.07975050479003	1.382711088787	2.87177366604628	2.83995020810999
ENSMUSG00000032641	78.7716279919675	94.5686786722849	80.5522127572267	91.0939648180574	67.3080840088954	42.0205641157169	119.31079184903	114.903432464889	121.640469996607	74.9562256686346	136.949874992449	112.989434739239	75.7191887273581	113.458371618475	-0.585915767465654	0.00802786129896384	0.0833458938916939	Gpr19	6	134846056	134875541	-	2920	protein_coding	G protein-coupled receptor 19 [Source:MGI Symbol;Acc:MGI:892973]	-	74	88	87	102	73	43	122	135	124	65	141	99	1.71456909510925	2.04167122890606	1.72864413220769	1.94318954656739	1.45836695700955	0.913346869043262	2.5860094339623	2.50929120218941	2.6533382971857	1.61204836344573	2.99781539085554
ENSMUSG00000030007	1559.46533794909	1779.61058956027	1499.93775478974	1724.53378493793	1589.57721686761	1530.33031174913	1600.91611685952	1903.99243277006	2082.60256292577	2046.88154710502	1780.34837490184	1876.30940112432	1613.90916597563	1881.84173928109	-0.221491830618998	0.00804444626907387	0.0834475414499707	Cct7	6	85428496	85445457	+	6778	protein_coding	chaperonin containing Tcp1, subunit 7 (eta) [Source:MGI Symbol;Acc:MGI:107184]	-	1465	1656	1620	1931	1724	1566	1637	2237	2123	1775	1833	1644	14.6231920343607	16.5517819362105	13.8670041394832	15.8481493212053	14.8375605422512	14.3298067448431	14.9485903461986	17.9128449387991	19.5705135190485	18.9646291570901	16.7891815044079
ENSMUSG00000025217	331.053733858134	329.915731277176	333.319501064386	250.954942292884	310.723620698599	299.030060916497	358.910332857327	319.17620129136	360.997523860897	431.286590770298	502.149541638981	385.761908503663	309.166265017946	393.047016487087	-0.346169011523915	0.00806365576654231	0.0835057505267055	Btrc	19	45352173	45518452	+	16908	protein_coding	beta-transducin repeat containing protein [Source:MGI Symbol;Acc:MGI:1338871]	-	311	307	360	281	337	306	367	375	368	374	517	338	1.24444089048732	1.23007650792023	1.23531995449119	0.92451066599723	1.16269142302394	1.12248185037981	1.34346683780079	1.20375796966477	1.35990750733756	1.60186873464706	1.89830909144153
ENSMUSG00000071072	1438.11445158308	1453.99343458638	1420.31142953547	1570.03127598181	1470.63553416696	1270.38914768446	1710.44733560617	1789.94013684194	1784.38721712764	1546.40459417906	1469.54014796862	1685.71106171571	1437.24587892303	1664.40508223986	-0.211865241259783	0.008072545954103	0.0835273878755628	Ptges3	10	127894823	127913141	+	2217	protein_coding	prostaglandin E synthase 3 [Source:MGI Symbol;Acc:MGI:1929282]	-	1351	1353	1534	1758	1595	1300	1749	2103	1819	1341	1513	1477	41.22833336185	41.3445330725023	40.1447596084347	44.111418410178	41.968340936946	36.3687018376837	48.8289338716482	51.4841712783597	51.2649806434731	43.8036849360654	42.368380004236
ENSMUSG00000031523	613.141320586125	656.607530326887	611.085751951375	808.235668238647	647.264040743076	766.142378295861	959.376121343428	1234.14797832659	644.498296675569	757.634465604507	1073.25965862877	706.469293975643	683.746115023662	895.897635759084	-0.390611386714964	0.00814400544738702	0.0839837740594521	Dlc1	8	37034905	37420297	-	14694	protein_coding	deleted in liver cancer 1 [Source:MGI Symbol;Acc:MGI:1354949]	-	576	611	660	905	702	784	981	1450	657	657	1105	619	2.65209191143117	2.81700204854477	2.60599210217218	3.42615012647486	2.786916030545	3.30922401543955	4.13220727082409	5.35584640244695	2.79369587040845	3.23797056084516	4.66864515556333
ENSMUSG00000020849	3389.3089665733	3684.95453599165	3399.85891085674	3368.69054209522	2991.06060992954	3571.74794983594	3742.64262628063	3882.88488077649	3959.2011040831	3950.76967908834	3661.70942355698	3818.81463270194	3400.93691921373	3836.00372441458	-0.173811715691003	0.00815663088828709	0.0840434065184078	Ywhae	11	75623695	75656671	+	2568	protein_coding	tyrosine 3-monooxygenase/tryptophan 5-monooxygenase activation protein, epsilon polypeptide [Source:MGI Symbol;Acc:MGI:894689]	-	3184	3429	3672	3772	3244	3655	3827	4562	4036	3426	3770	3346	83.8849717762131	90.4603895861793	82.9615482334417	81.7098681791905	73.690691721791	88.2759707541035	92.2394210683164	96.4185083535632	98.1996477518878	96.6139639590341	91.1412445281097
ENSMUSG00000035443	261.862439000324	280.48210378939	301.839325963861	275.068050627075	235.1172797571	227.692824161908	304.144723484002	467.27395869055	314.891861846054	292.905866458972	309.836951224052	353.805300698626	263.677003883277	340.476443733709	-0.37045505246219	0.00818580833758989	0.0840788020032683	Thyn1	9	26911006	26918632	+	2813	protein_coding	thymocyte nuclear protein 1 [Source:MGI Symbol;Acc:MGI:1925112]	-	246	261	326	308	255	233	311	549	321	254	319	310	5.91659031138669	6.28574506743806	6.72383524086097	6.0908629772166	5.28807072929165	5.13731657687542	6.84295655175282	10.5926045487375	7.12999281193909	6.53900314583624	7.0402742088382
ENSMUSG00000070394	1212.44438220069	1197.15350046506	966.626553086721	848.424182128966	1100.90208639207	780.800714615298	1273.30041792981	1507.36280663199	1118.307546743	1173.92981124108	1260.71587049787	1241.74247471002	1017.72523648147	1262.55982129229	-0.311923148630475	0.00819429457726039	0.0840788020032683	Tmem256	11	69729340	69730444	+	1105	protein_coding	transmembrane protein 256 [Source:MGI Symbol;Acc:MGI:1916436]	-	1139	1114	1044	950	1194	799	1302	1771	1140	1018	1298	1088	69.7376918434872	68.2981438408469	54.8160094050295	47.8254618239549	63.0331274812454	44.8471285536663	72.929264197131	86.9874159859639	64.4609000413936	66.7164703549493	72.9257724835856
ENSMUSG00000026104	388.535732663083	372.901494310032	424.982363857093	438.501340447708	451.793988552859	436.818422319197	697.283562199657	556.643295052131	499.314509905426	389.7723734769	587.621804045616	463.370813173039	418.922223691662	532.334392975461	-0.346420501735921	0.00820715887526266	0.0841405052637529	Stat1	1	52158599	52201024	+	7105	protein_coding	signal transducer and activator of transcription 1 [Source:MGI Symbol;Acc:MGI:103063]	STAT	365	347	459	491	490	447	713	654	509	338	605	406	3.47564094864187	3.30865420634761	3.74815721082826	3.84428214969381	4.023081260716	3.90205674795027	6.21124375714649	4.99590087627084	4.47617947871917	3.44508688959323	5.28639871979617
ENSMUSG00000020620	836.682427049817	847.8941758231	1025.88335327594	935.945834601217	971.818089662681	882.431846430055	1216.57889393601	1034.130892184	950.561414731547	1042.46812314532	1263.62969762537	1036.30713882049	916.775954473803	1090.61269340712	-0.25015256799804	0.00821760113740391	0.0841772953874853	Abca8b	11	109823016	109886671	-	7423	protein_coding	ATP-binding cassette, sub-family A (ABC1), member 8b [Source:MGI Symbol;Acc:MGI:1351668]	-	786	789	1108	1048	1054	903	1244	1215	969	904	1301	908	7.16389494588977	7.20084612759497	8.66023137093235	7.85379692004405	8.2830056456315	7.54498585608687	10.3727532157245	8.88376300599998	8.15639234324114	8.81934905858178	10.8809411085049
ENSMUSG00000062619	670.623319391075	718.936886724529	628.677614507551	509.947587363831	520.024101109822	423.137308421056	795.079293223452	714.954690892645	741.614478366408	808.374064518659	641.041968049763	673.371378748997	578.557802919644	729.072645633321	-0.334327067271651	0.00823203124565604	0.0841846858943776	2310039H08Rik	17	47083561	47084322	+	762	protein_coding	RIKEN cDNA 2310039H08 gene [Source:MGI Symbol;Acc:MGI:1914351]	-	630	669	679	571	564	433	813	840	756	701	660	590	55.93603794004	59.4781065414491	51.6992208653204	41.6849209353964	43.1768484909914	35.2438273620075	66.0372074765408	59.8307520242072	61.9898543497944	66.6209173451308	53.7721730911264
ENSMUSG00000060548	137.318108256268	95.6433227481063	99.0699628163593	61.6223879651565	127.239939633254	71.3372367545891	143.759724604978	93.6250190454655	195.213334913909	147.60610593208	147.633907793279	167.772190976445	98.7051596956222	149.26838054436	-0.596712118151877	0.00824311235404757	0.0842110723638947	Tnfrsf19	14	61201324	61283939	-	4738	protein_coding	tumor necrosis factor receptor superfamily, member 19 [Source:MGI Symbol;Acc:MGI:1352474]	-	129	89	107	69	138	73	147	110	199	128	152	147	1.84204729657214	1.27256782437955	1.31026130785814	0.810124711018959	1.6990682994286	0.955603966963108	1.92032795437304	1.26007900527374	2.6242899170207	1.9564217174448	1.99166896149335
ENSMUSG00000037849	6.38688875610547	7.52250853074993	9.25887502956629	16.9684836425793	26.7388278939447	16.6127811620276	51.8317374426113	13.6181845884313	50.0295481437656	23.0634540518876	26.2244441474903	28.5326855402118	13.9147275024956	32.2166756523996	-1.20323362858557	0.00827833253348204	1	Ifi206	1	173296051	173318607	-	3054	protein_coding	interferon activated gene 206 [Source:MGI Symbol;Acc:MGI:3646410]	-	6	7	10	19	29	17	53	16	51	20	27	25	0.132919390371131	0.155279811569179	0.189976622558185	0.34608471064486	0.553931129708932	0.345247091723455	1.07413770706519	0.284348601630623	1.04340985702752	0.474251294268452	0.548862241857095
ENSMUSG00000021731	315.08651196787	283.706036016855	348.133701111693	304.539627479976	318.099849083136	307.825062708159	445.948533468505	383.862578086408	335.492264022899	348.258156183502	363.257115228199	429.131590524785	312.898464727948	384.325039585716	-0.296000926168143	0.00827950452224553	0.0844591981247671	Mrps30	13	118514917	118523788	-	6666	protein_coding	mitochondrial ribosomal protein S30 [Source:MGI Symbol;Acc:MGI:1926237]	-	296	264	376	341	345	315	456	451	342	302	374	376	3.00422547717912	2.68302429721229	3.27259099295011	2.845685591071	3.01912151316109	2.93086209834702	4.23401760033726	3.67207361845883	3.20563881844014	3.28087130748686	3.48317196830909
ENSMUSG00000037321	735.55668841148	930.641769661349	878.667240305841	669.808564838658	1063.09891592132	636.171796263528	1230.27029627934	1096.26385936872	916.227411103473	1028.63005071419	1083.9436914296	874.241484952088	818.990829233696	1038.26279897457	-0.342582747023527	0.00832585080625304	0.084791127365174	Tap1	17	34406527	34416199	+	5476	protein_coding	transporter 1, ATP-binding cassette, sub-family B (MDR/TAP) [Source:MGI Symbol;Acc:MGI:98483]	-	691	866	949	750	1153	651	1258	1288	934	892	1116	766	8.53730370013581	10.7137236659957	10.0547660047986	7.61895957221994	12.2826669206137	7.37339821250326	14.2190416816447	12.7659332843469	10.6570555255022	11.7963860464271	12.6522970259505
[truncated: 827 more rows]
[truncated: 1 more columns]
