# Supplementary material for: Loss of CTRP10 results in female obesity with preserved metabolic health
Source: eLife. 2025 Mar 24;13:RP93373. doi: 10.7554/eLife.93373 (PMC11932693; doi:10.7554/eLife.93373)
Supplement: Figure 8—source data 7. [file elife-93373-fig8-data7.xls]

gene_id	KO_Muscle1	KO_Muscle2	KO_Muscle3	KO_Muscle4	KO_Muscle5	KO_Muscle6	WT_Muscle1	WT_Muscle2	WT_Muscle3	WT_Muscle4	WT_Muscle5	WT_Muscle6	KO_Muscle	WT_Muscle	log2FoldChange	pvalue	padj	gene_name	gene_chr	gene_start	gene_end	gene_strand	gene_length	gene_biotype	gene_description	tf_family	KO_Muscle1_count	KO_Muscle2_count	KO_Muscle3_count	KO_Muscle4_count	KO_Muscle5_count	KO_Muscle6_count	WT_Muscle1_count	WT_Muscle2_count	WT_Muscle3_count	WT_Muscle4_count	WT_Muscle5_count	WT_Muscle6_count	KO_Muscle1_fpkm	KO_Muscle2_fpkm	KO_Muscle3_fpkm	KO_Muscle4_fpkm	KO_Muscle5_fpkm	KO_Muscle6_fpkm	WT_Muscle1_fpkm	WT_Muscle2_fpkm	WT_Muscle3_fpkm	WT_Muscle4_fpkm	WT_Muscle5_fpkm
ENSMUSG00000027074	794.170589837991	724.212129710269	872.36126364491	843.049612580662	746.539910356229	767.981019443176	393.79937192067	380.343308142474	524.724033839931	551.476900424439	334.163767123583	476.417611931355	791.385754262206	443.487498897075	0.835079399036211	1.02075313608113e-13	1.93310228911044e-09	Slc43a3	2	84766923	84788853	+	4464	protein_coding	solute carrier family 43, member 3 [Source:MGI Symbol;Acc:MGI:1931054]	-	756	690	820	1028	876	742	372	413	482	533	293	553	15.9757260600161	14.647251765497	17.4850675032963	16.7553231528441	15.0248965607335	15.3805883011694	7.94812887836196	7.73303567076386	10.645581878531	11.0672165746559	6.68847764492804
ENSMUSG00000024413	938.087746991172	1023.34322676451	909.596195629754	1248.99276260734	1239.97211137935	1440.74067259421	611.871067124052	617.021831611278	747.895044083055	789.450046949056	622.707907336096	694.380823176623	1133.45545266106	680.554453380027	0.736529980747529	1.03323534558398e-10	4.89185274366736e-07	Npc1	18	12322749	12369457	-	11317	protein_coding	NPC intracellular cholesterol transporter 1 [Source:MGI Symbol;Acc:MGI:1097712]	-	893	975	855	1523	1455	1392	578	670	687	763	546	806	7.4436019055938	8.16402905263071	7.1913834401064	9.79157302090833	9.84381057526819	11.3815431019832	4.87127524081634	4.94843231774226	5.98510775044096	6.24926019982694	4.91637693180168
ENSMUSG00000056749	414.943628288368	504.849325203825	576.609518165294	724.957059845627	468.717980246491	690.354905618057	173.610475792983	230.232026720626	369.048646206922	296.949100228544	179.057035625947	328.237088871332	563.405402894611	262.855728907726	1.09929579927649	9.40371303601924e-10	2.49558910148558e-06	Nfil3	13	53121245	53135109	-	2026	protein_coding	nuclear factor, interleukin 3, regulated [Source:MGI Symbol;Acc:MGI:109495]	TF_bZIP	395	481	542	884	550	667	164	250	339	287	157	381	18.3916481553986	22.4976355457651	25.4646371580522	31.7465622481657	20.7852292547978	30.4634875324768	7.7205911315974	10.3139427258861	16.4970697063214	13.1303965192819	7.89667122710653
ENSMUSG00000024066	1166.04412000022	1177.6318978767	1263.85997708555	1386.76740746488	1164.97723453991	1255.47301426492	694.441903171934	694.379792589408	877.443093931503	990.175222713298	629.550851372756	891.667682367003	1235.79227520537	796.276424357651	0.633813483530145	9.54427188047352e-10	2.49558910148558e-06	Xdh	17	74190890	74257191	-	9175	protein_coding	xanthine dehydrogenase [Source:MGI Symbol;Acc:MGI:98973]	-	1110	1122	1188	1691	1367	1213	656	754	806	957	552	1035	11.4124766311178	11.5882545307716	12.3250308374614	13.4097726311045	11.4075928463297	12.2334219631745	6.81936463547306	6.86893522129024	8.66114922374859	9.6681025981822	6.13079578623512
ENSMUSG00000069094	2706.06275055908	3028.04636842627	2796.87531966155	3026.12166383525	3272.50371663005	3535.61073102141	1986.99306745994	2205.6228159836	2349.28312246176	2133.48099188592	2033.49486956091	2487.19284926912	3060.87009168894	2199.34461943688	0.476633610757448	1.04583465761347e-09	2.49558910148558e-06	Pde7a	3	19277272	19365486	-	7748	protein_coding	phosphodiesterase 7A [Source:MGI Symbol;Acc:MGI:1202402]	-	2576	2885	2629	3690	3840	3416	1877	2395	2158	2062	1783	2887	31.3631187218489	35.2847826979566	32.2982224160074	34.6513878597706	37.9466273913845	40.7963658717685	23.1057892173754	25.8368791277931	27.4604962055354	24.6680281046835	23.4501473818664
ENSMUSG00000025612	763.706374090237	833.36874056515	786.188992479986	929.158765616624	822.387001705207	1122.99111333672	488.014813052228	605.049766221805	645.562971093525	598.036863874907	492.691970639548	553.953932137182	876.300164632321	563.885052836533	0.635785887027271	1.05421442664931e-09	2.49558910148558e-06	Bach1	16	87495833	87530234	+	6179	protein_coding	BTB and CNC homology 1, basic leucine zipper transcription factor 1 [Source:MGI Symbol;Acc:MGI:894680]	TF_bZIP	727	794	739	1133	965	1085	461	657	593	578	432	643	11.0988814098316	12.1768105419374	11.3842359933437	13.3412214860453	11.9575082357435	16.2481818474399	7.11588427821627	8.88733031976559	9.4620023251413	8.67051769434949	7.12441807874308
ENSMUSG00000024481	111.35196100903	164.784499079003	174.472252728982	177.958916274323	160.216327793346	158.357272203243	48.6956212590076	71.8323923368353	101.243433915173	99.3279220276663	55.8840429660599	74.0902615300119	157.856871514654	75.1789456724591	1.07079011984212	2.83068359526536e-09	5.95638732523726e-06	Lvrn	18	46983105	47040309	+	5275	protein_coding	laeverin [Source:MGI Symbol;Acc:MGI:1921824]	-	106	157	164	217	188	153	46	78	93	96	49	86	1.89559867599054	2.82038522023354	2.95936839183752	2.99309946600075	2.72877015093543	2.68387444334954	0.831728367934749	1.23593686527873	1.73822918252774	1.68687986618508	0.946580299332597
ENSMUSG00000115186	170.179412108141	130.148266788512	164.897555932879	186.979875163804	136.354321526252	237.018400879363	56.1058244940739	65.3858955886578	75.1160961306125	118.986573262309	92.3797444949153	66.3366295094292	170.929638733159	79.0517939133329	1.11526025895085	4.84283465446008e-09	8.33760024419682e-06	Gm49417	14	70442773	70492736	+	2128	lncRNA	predicted gene, 49417 [Source:MGI Symbol;Acc:MGI:6155048]	-	162	124	155	228	160	229	53	71	69	115	81	77	7.18135484008244	5.52180802091242	6.93326374637858	7.7955561305895	5.75678393304447	9.95765526163803	2.37547460838262	2.78875828072896	3.19686295734566	5.00912192015452	3.87879869377527
ENSMUSG00000030852	14862.335324111	14634.3329341308	13936.5031143272	15321.6886301989	17036.6202601956	16469.1563091372	8077.12152622234	8203.62757610935	9601.79663582612	13538.6027055418	9917.70689046646	11303.0724566716	15376.7727620168	10106.9879651396	0.605408829280329	1.81597849993127e-08	2.86591673597487e-05	Tacc2	7	130179168	130366515	+	15793	protein_coding	transforming, acidic coiled-coil containing protein 2 [Source:MGI Symbol;Acc:MGI:1928899]	-	14148	13943	13100	18683	19991	15912	7630	8908	8820	13085	8696	13120	84.5071413942928	83.6609580670276	78.9558488775331	86.0727855222462	96.9173329420024	93.2295016539959	46.0793186920041	47.1454429813825	55.061812353026	76.7970392893231	56.1098026415802
ENSMUSG00000008348	3877.3593215503	3064.78176631012	3068.15839555112	3491.11109022945	4158.80680655068	3510.77037459738	2509.94169576319	2213.91116894554	2544.14951677161	1826.18523311282	2542.15370961934	2750.81633796893	3528.49795913151	2397.85961036357	0.557429087871146	2.41252029634326e-08	3.51448533631913e-05	Ubc	5	125463029	125467266	-	2893	protein_coding	ubiquitin C [Source:MGI Symbol;Acc:MGI:98889]	-	3691	2920	2884	4257	4880	3392	2371	2404	2337	1765	2229	3193	120.35346741811	95.6457461503986	94.8908789126474	107.062922979807	129.152542132844	108.492730119275	78.1680479941771	69.4560654022801	79.6446908842542	56.549876620769	78.5137065192209
ENSMUSG00000064357	5546.58824648756	6489.57043188202	6084.18788632347	8791.33448138589	7115.99115465127	5862.32411607298	3882.94649517478	4988.66755498253	4078.04197254021	4358.01257896386	5175.54667306081	4129.23980829473	6648.3327194672	4435.40918050282	0.584148401679907	3.53909279497279e-08	4.46822262341298e-05	mt-Atp6	MT	7927	8607	+	681	protein_coding	mitochondrially encoded ATP synthase 6 [Source:MGI Symbol;Acc:MGI:99927]	-	5280	6183	5719	10720	8350	5664	3668	5417	3746	4212	4538	4793	731.391326901179	860.366270874729	799.375128206785	1145.33241711099	938.7953593014	769.607623051646	513.722233054302	664.868674382667	542.334476199226	573.292996372675	679.049173676428
ENSMUSG00000054027	2039.0014747031	2280.74341718901	2209.62724950058	2265.0807684317	2547.26916901229	2411.58460283369	1623.89310894169	1702.79606962575	1845.24323103461	1782.72926722572	1763.19858011283	1956.49981319369	2292.2177802784	1779.06001168905	0.365687930749699	3.98942012888064e-08	4.72197740004635e-05	Nt5dc3	10	86614869	86674253	+	6004	protein_coding	5'-nucleotidase domain containing 3 [Source:MGI Symbol;Acc:MGI:3513266]	-	1941	2173	2077	2762	2989	2330	1534	1849	1695	1723	1546	2271	30.4963488708236	34.2965380996729	32.9286146536866	33.4708599220114	38.1168323516106	35.9094261936469	24.3686136563769	25.7407013210733	27.8339966897129	26.5998985047809	26.2393245594849
ENSMUSG00000017707	3562.21226209078	3449.97865269225	3663.91730730862	3815.8656102508	3549.47343223025	3695.00301807566	2589.33673042462	2854.87713133576	3259.38538862397	2940.5203583607	2474.86475992551	2868.84384761558	3622.74171377473	2831.30470271436	0.355565505310146	8.6787943067309e-08	9.13105592115944e-05	Serinc3	2	163465192	163487051	-	3840	protein_coding	serine incorporator 3 [Source:MGI Symbol;Acc:MGI:1349457]	-	3391	3287	3444	4653	4165	3570	2446	3100	2994	2842	2170	3330	83.3027926168132	81.1147289754807	85.3708420848441	88.1628676143856	83.0453561403729	86.026097066564	60.7535101139792	67.4768215460418	76.871813003681	68.6006506562147	57.5853956281112
ENSMUSG00000022462	2657.74020144195	2429.78417431779	2837.30181724509	2778.45533796039	2979.3419253486	3207.51102325391	1215.27333055088	1429.28042188165	2144.6189764827	2281.43820907296	1406.22499953371	1934.96194646984	2815.02241326129	1735.29964733196	0.697918572082357	1.23130748854436e-07	0.000116592506090266	Slc38a2	15	96585273	96597611	-	8838	protein_coding	solute carrier family 38, member 2 [Source:MGI Symbol;Acc:MGI:1915010]	-	2530	2315	2667	3388	3496	3099	1148	1552	1970	2205	1233	2246	27.0040882959313	24.8215123929488	28.7241155624664	27.8915907359222	30.2864936838631	32.4459733423738	12.3889367988588	14.6778304765899	21.9765128435284	23.1254388053817	14.2165077064754
ENSMUSG00000021699	2969.73579030688	3107.81466097407	3073.47767154896	3833.90752802976	3674.74896513249	3640.14723097258	2193.42015757965	2468.08732644511	2595.31555326638	2671.50723620244	2679.01259035254	2690.51031114218	3383.30530782745	2549.64219583138	0.408501781085423	2.7310080542949e-07	0.000224868828401029	Pde4d	13	108586482	110089995	+	12006	protein_coding	phosphodiesterase 4D, cAMP specific [Source:MGI Symbol;Acc:MGI:99555]	-	2827	2961	2889	4675	4312	3517	2072	2680	2384	2582	2349	3123	22.2121432096909	23.3706779098578	22.9048182327526	28.3313425924306	27.4986886428891	27.1061138009689	16.4602928895212	18.6578072763249	19.5773752082703	19.9339463266927	19.9374000491637
ENSMUSG00000028834	6091.79265935253	5605.82171707615	6440.5793781784	8770.01221491984	6654.94310499063	11034.2933265279	2390.31984353998	2622.80324840137	4406.81097299593	4097.27678364123	2826.13588714074	4068.93378146798	7432.90706684091	3402.04675286454	1.12751997680534	5.01135591232063e-07	0.000365019454875108	Trim63	4	134042431	134056940	+	2842	protein_coding	tripartite motif-containing 63 [Source:MGI Symbol;Acc:MGI:2447992]	-	5799	5341	6054	10694	7809	10661	2258	2848	4048	3960	2478	4723	192.482845620659	178.08598638302	202.766399667171	273.778907259521	210.379258357079	347.109977781683	75.7785010865924	83.7606539023413	140.430998086882	129.153594610384	88.8507450466837
ENSMUSG00000008730	1384.54608122549	1221.71437533732	1417.0551258232	1466.31586312668	1230.59775177442	1327.92405383503	792.891746152101	1010.25813325011	936.229603946764	1146.40976673598	923.797444949153	1104.46180559855	1341.35887518702	985.674750105443	0.443776454609885	5.78629830030048e-07	0.000405855248929965	Hipk1	3	103647131	103698879	-	10914	protein_coding	homeodomain interacting protein kinase 1 [Source:MGI Symbol;Acc:MGI:1314873]	-	1318	1164	1332	1788	1444	1283	749	1097	860	1108	810	1282	11.3918552031927	10.1064881842616	11.6171052014016	11.9197581736556	10.1301252328116	10.8776713931989	6.54551789982749	8.40130643761106	7.76892724008141	9.41003408646765	7.56284004063935
ENSMUSG00000026121	250.016667171219	242.453626033438	298.943311078317	277.189464058622	194.304908174909	348.800004787534	139.735261004109	126.167150642903	198.13231153292	175.893195257326	99.2226885315757	176.610507135493	268.617996884007	152.626852350721	0.813344739714071	9.56207499725985e-07	0.000584150246122926	Sema4c	1	36587720	36597430	-	4593	protein_coding	sema domain, immunoglobulin domain (Ig), transmembrane domain (TM) and short cytoplasmic domain, (semaphorin) 4C [Source:MGI Symbol;Acc:MGI:109252]	-	238	231	281	338	228	337	132	137	182	170	87	205	4.88813854917106	4.76592030864618	5.82354614791725	5.35431767326359	3.80075584553975	6.78932632790363	2.74109212787401	2.49314920172645	3.90680284089571	3.43074043835155	1.93021929498399
ENSMUSG00000040170	876.108825297466	667.534658689465	924.490168423691	1060.3727131	728.643405655909	821.801791695259	353.572554358881	489.01282475461	481.178470865663	655.978151724379	445.931853055702	680.596588473365	846.491927143631	517.711740538767	0.708494578123947	1.00766575822848e-06	0.000596349191541591	Fmo2	1	162701886	162726295	-	5609	protein_coding	flavin containing monooxygenase 2 [Source:MGI Symbol;Acc:MGI:1916776]	-	834	636	869	1293	855	794	334	531	442	634	391	790	14.0263155831413	10.7449133448649	14.7472819423198	16.772467709744	11.6711122293841	13.0987028606022	5.67946167667583	7.91285538824361	7.76932665919511	10.4770545114921	7.10354543856617
ENSMUSG00000036391	710.131373982119	798.732508274659	793.635978876955	866.012053390252	876.076515806169	941.863514411442	558.941044016435	481.64539989955	734.831375190774	643.562161470921	554.278466969492	592.722092240095	831.075324123599	594.330089964545	0.484925776616392	1.13020091690114e-06	0.00064859833225072	Sec24a	11	51583091	51654461	-	10683	protein_coding	Sec24 related gene family, member A (S. cerevisiae) [Source:MGI Symbol;Acc:MGI:1924621]	-	676	761	746	1056	1028	910	528	523	675	622	486	688	5.96920457181544	6.75029371622214	6.64696276460402	7.19208099064777	7.36769190734412	7.88209004513837	4.71397028674542	4.09197157519927	6.22955603570525	5.3967530041368	4.63582343181903
ENSMUSG00000033416	1377.1926498381	1662.53914994357	1457.48162340674	1899.3218898218	1517.79404148909	1563.9074398634	1109.41328433565	1071.03938830435	1281.32819051784	1247.80702047256	1125.66429403063	1302.61017945788	1579.70613239378	1189.64372618649	0.40956551333564	1.1694023031434e-06	0.000651357082850876	Gucd1	10	75186945	75353806	-	8206	protein_coding	guanylyl cyclase domain containing 1 [Source:MGI Symbol;Acc:MGI:1916028]	-	1311	1584	1370	2316	1781	1511	1048	1163	1177	1206	987	1512	15.0707260147654	18.2917352272792	15.8915661991165	20.5348210234978	16.617434567049	17.0382968205781	12.180802921555	11.8460169537199	14.1413705547612	13.6223232247699	12.2565851143084
ENSMUSG00000020593	6463.66618951476	7457.28577042241	6968.25155716361	7618.60982575326	7729.58560151941	8014.11999130527	4259.80825970101	4689.36592024571	6463.25018445574	5876.90205330359	4304.21179905939	5889.31427696699	7375.25315594645	5247.14208228874	0.491141149643089	1.43847231590572e-06	0.00075671635329507	Lpin1	12	16585670	16696967	-	9930	protein_coding	lipin 1 [Source:MGI Symbol;Acc:MGI:1891340]	-	6153	7105	6550	9290	9070	7743	4024	5092	5937	5680	3774	6836	58.4521731331829	67.8025574697919	62.7869950313636	68.069152758944	69.9341996603311	72.1528082350062	38.6504780743547	42.8610981775586	58.9473590552356	53.0193590032703	38.729018665492
ENSMUSG00000031442	681.768138630762	659.137996316013	748.954060495142	934.079288647251	628.934308039837	730.720484807119	400.150974693584	338.901543332762	547.585454401422	603.210193147182	407.155170181293	514.324257365315	730.599046156021	468.554598853593	0.641463230826582	1.52160707567826e-06	0.000778816075653914	Mcf2l	8	12923806	13070905	+	12984	protein_coding	mcf.2 transforming sequence-like [Source:MGI Symbol;Acc:MGI:103263]	-	649	628	704	1139	738	706	378	368	503	583	357	597	4.71518986887106	4.58334320293651	5.16109435812549	6.38262158853872	4.35190519226777	5.03140668263412	2.77670306471425	2.36899126625183	3.81949574474657	4.16193634511357	2.80184144252214
ENSMUSG00000073490	140.765686558586	109.156610854881	136.173465544571	160.73708566713	119.31003133547	157.322257352241	39.1682170996365	74.5951766574829	99.06615576646	66.2186146851109	37.6361922016322	89.5975255711771	137.244189552147	67.7136469969166	1.01450862544697	1.65076497902325e-06	0.000822689136124797	Ifi207	1	173550993	173569313	-	3422	protein_coding	interferon activated gene 207 [Source:MGI Symbol;Acc:MGI:2138302]	-	134	104	128	196	140	152	37	81	91	64	33	104	3.69392257678923	2.87994753286177	3.56047229934123	4.1673497023841	3.13241720728486	4.11014185160545	1.0312592700154	1.97846859728143	2.62185059150117	1.73354593690363	0.982692813644735
ENSMUSG00000042628	584.072550198311	598.262194108483	576.609518165294	676.571916711134	663.875102930939	594.09852447491	517.655625992493	501.905818250965	488.79894438616	476.980958903689	473.303629202344	453.156715869607	615.581634431512	485.300282100876	0.345642757054829	1.7466973372692e-06	0.000848178312133439	Zfyve1	12	83593332	83643996	-	8343	protein_coding	zinc finger, FYVE domain containing 1 [Source:MGI Symbol;Acc:MGI:3026685]	-	556	570	542	825	779	574	489	545	449	461	415	526	6.28659587724954	6.47416634482639	6.18378939017306	7.19474795703454	7.14902448700633	6.36623809188862	5.59026971811434	5.46007246297094	5.30604158928855	5.12169918718316	5.06885302300712
ENSMUSG00000049550	10888.3309043264	11505.5266172231	10675.7869276545	11193.3698075034	12311.0908048015	11065.3437720579	8135.34455164072	9433.98752690438	10389.9713256604	9273.71005347888	9182.09040652547	8728.86662583814	11273.2414722611	9190.66174834133	0.294773334361485	2.18465280949115e-06	0.00103432387265358	Clip1	5	123715858	123822681	-	12388	protein_coding	CAP-GLY domain containing linker protein 1 [Source:MGI Symbol;Acc:MGI:1928401]	-	10365	10962	10035	13649	14446	10691	7685	10244	9544	8963	8051	10132	78.9280012757981	83.8532390019184	77.1070036595074	80.164763683663	89.2848933860925	79.8565163892309	59.1682632517388	69.1182161218397	75.9583961783049	67.0637115801365	66.2266024343235
ENSMUSG00000022246	121.856862991014	137.495346365283	112.768651154098	144.335342231709	161.068542302885	143.86706428922	97.3912425180151	93.9346669020155	93.6229603946764	76.5652732296594	87.8177818038084	86.1514668953626	136.898634889035	89.2472319572562	0.621352413059026	3.33414381401765e-06	0.00154004915975284	Rai14	15	10569055	10714710	-	8462	protein_coding	retinoic acid induced 14 [Source:MGI Symbol;Acc:MGI:1922896]	-	116	131	106	176	189	139	92	102	86	74	77	100	1.2931471995097	1.46699798184456	1.19236849120022	1.51329475346825	1.71009545881516	1.51996996856764	1.03695749015736	1.00751448460875	1.00200983098852	0.810576641364024	0.927260051132355
ENSMUSG00000040183	120.806372792816	109.156610854881	91.4915471627589	125.473337280974	112.492315259158	169.74243556426	53.9886235697693	75.5161047643654	60.9637881639754	80.7039366474789	72.9914030577109	78.39783487478	121.527103152475	70.4269485130133	0.784278044621182	3.51323799990485e-06	0.00158413574386186	Ankrd6	4	32804035	32950841	-	5477	protein_coding	ankyrin repeat domain 6 [Source:MGI Symbol;Acc:MGI:2154278]	-	115	104	86	153	132	164	51	82	56	78	64	91	1.98069723272064	1.79937565409038	1.4946288369513	2.03250943116338	1.84528206551997	2.77073081721624	0.888123949891824	1.25139743139449	1.00807266461055	1.32004047406931	1.19075133882576
ENSMUSG00000007659	359.267647783853	260.296533577024	293.624035080482	371.499488812296	224.132416008777	278.418994919426	129.149256382585	181.422837055853	239.500596358475	181.0665245296	112.908576604896	199.871403197241	297.87318603031	173.986532354775	0.774126086992828	4.73159091871562e-06	0.00199126375152526	Bcl2l1	2	152622588	152673648	-	4586	protein_coding	BCL2-like 1 [Source:MGI Symbol;Acc:MGI:88139]	-	342	248	276	453	263	269	122	197	220	175	99	232	7.03485339182568	5.12446902246037	5.72865513502953	7.1870063934	4.39089719132059	5.42764528908943	2.53730062754512	3.5905115121161	4.72971729368824	3.53703521694674	2.19980907651043
ENSMUSG00000030087	1118.7720610813	999.202822440835	1107.47326274921	1204.7080553317	911.017310697271	1356.90446966308	576.937251873024	675.961230451758	857.847590593082	946.719256826194	629.550851372756	846.868919581415	1116.34633032723	755.647516783038	0.562491008326217	4.84019450175431e-06	0.00199230708910843	Klf15	6	90439558	90452220	+	2791	protein_coding	Kruppel-like factor 15 [Source:MGI Symbol;Acc:MGI:1929988]	zf-C2H2	1065	952	1041	1469	1069	1311	545	734	788	915	552	983	35.9958776251169	32.3227537534632	35.5032850929547	38.2953319913302	29.3257710228758	43.4646396326306	18.6244223806833	21.9816541806973	27.8363913308641	30.3876169463065	20.1540850371577
ENSMUSG00000022091	1987.52745499137	1984.76106852481	1998.98391998632	2411.05628500695	1977.98987664019	2618.58757303401	1254.44154765052	1342.71317983469	2010.71637033683	1482.67616943381	1507.72866941084	1628.26272432235	2163.15102969728	1537.75644349817	0.492527714135164	5.83259334219056e-06	0.00224545938626049	Sorbs3	14	70417917	70449438	-	3630	protein_coding	sorbin and SH3 domain containing 3 [Source:MGI Symbol;Acc:MGI:700013]	-	1892	1891	1879	2940	2321	2530	1185	1458	1847	1433	1322	1890	49.1674293518072	49.3646594751102	49.2717289417217	58.9283912461091	48.9553416706142	64.49218990679	31.1356453582113	33.5718324292415	50.1656937651563	36.59105665887	37.111514288024
ENSMUSG00000029722	134.462745369395	123.850770008423	119.1517823515	128.753685968058	74.1426623298995	136.621960332209	80.4536351235777	62.6231112680103	65.3183444614022	77.5999390841143	53.6030616205064	76.6748055368728	119.497267726581	69.3788161824139	0.779302489781889	5.92844911358245e-06	0.00224545938626049	Agfg2	5	137648725	137682988	-	3822	protein_coding	ArfGAP with FG repeats 2 [Source:MGI Symbol;Acc:MGI:2443267]	-	128	118	112	157	87	132	76	68	60	75	47	89	3.15923754733966	2.92565132527133	2.78936268506083	2.98877243590367	1.74285052038874	3.19577707134868	1.89657078416172	1.48710754731541	1.54777247815429	1.8188880359854	1.25311526560533
ENSMUSG00000035828	835.139707567729	587.766366141668	743.634784497308	834.848740862951	597.402371186891	819.731761993255	508.128221833122	507.43138689226	569.358235888556	579.41287849472	460.7582318018	552.230902799275	736.420622041634	529.553309618289	0.475277901548687	6.31521245917946e-06	0.00234031218539039	Pim3	15	88746389	88749929	+	2427	protein_coding	proviral integration site 3 [Source:MGI Symbol;Acc:MGI:1355297]	-	795	560	699	1018	701	792	480	551	523	560	404	641	30.9001329290794	21.8650005394982	27.4147977493872	30.5184084530041	22.1146368532977	30.1959455295295	18.8632972144066	18.9760567406963	21.2460629942143	21.3871855029818	16.9627176905031
ENSMUSG00000022018	919.178923423601	1242.70603127095	1192.58167871457	1075.95436936365	699.66811233158	1112.6409648267	551.530840781368	529.53366145744	903.570431716063	623.903510236279	624.988888681649	765.02502603082	1040.45501332184	666.425393150603	0.642311437063494	6.42603409231705e-06	0.00234031218539039	Rgcc	14	79526196	79539085	-	918	protein_coding	regulator of cell cycle [Source:MGI Symbol;Acc:MGI:1913464]	-	875	1184	1121	1312	821	1075	521	575	830	603	548	888	89.9142171133805	122.219432520784	116.235979111822	103.986038494312	68.4750008715604	108.357508617191	54.1303940604782	52.353932804013	89.1419157870323	60.884958813977	60.8305471362042
ENSMUSG00000074794	2233.3421613698	2215.66928379475	1961.74898800148	2838.32170149968	1839.93112609486	2398.12940977067	497.542217211599	991.839571112457	1185.52795197445	1333.68428639231	695.699310393807	1499.03552397931	2247.85711175521	1033.88814351066	1.12021502383118	8.09444894348259e-06	0.00264297713951161	Arrdc3	13	81031503	81044161	+	6266	protein_coding	arrestin domain containing 3 [Source:MGI Symbol;Acc:MGI:2145242]	-	2126	2111	1844	3461	2159	2317	470	1077	1089	1289	610	1740	32.0063289927932	31.9248661053599	28.0122615706161	40.1878792160425	26.3811560169473	34.2159711657327	7.15407706255369	14.3664498281321	17.1349973458073	19.0676825296056	9.92026537183981
ENSMUSG00000024471	25931.3505425275	27050.8974188736	25349.5416952816	25938.5371559472	23021.7227606886	22301.4649945312	17789.78076647	19746.5404677747	22177.7552227947	20706.7677452051	17645.6716892016	21551.6509585439	24932.2524279749	19936.361141665	0.322566880117132	8.54804607828124e-06	0.00269804827717484	Myot	18	44467141	44488791	+	2209	protein_coding	myotilin [Source:MGI Symbol;Acc:MGI:1889800]	-	24685	25773	23828	31629	27014	21547	16805	21442	20372	20013	15472	25016	1054.14514057526	1105.60628691165	1026.76137382746	1041.77426526688	936.320970359711	902.577127667702	725.586088551594	811.322879882369	909.252500190088	839.753582264552	713.731042894745
ENSMUSG00000021846	278.379902522576	262.395699170387	228.728867906897	228.804320924129	288.048504224207	284.629084025436	176.786277179441	186.027477590266	216.639175796984	203.829173327607	183.618998317054	156.79566974956	261.831063128939	187.282795326819	0.485534622112199	9.3575351714029e-06	0.00290513116518079	Peli2	14	48358280	48519032	+	9089	protein_coding	pellino 2 [Source:MGI Symbol;Acc:MGI:1891445]	-	265	250	215	279	338	275	167	202	199	197	161	182	2.75038040924472	2.6064845019373	2.25164543403627	2.23342811795083	2.8472930457265	2.79968917709472	1.7524535451906	1.85763084539744	2.15865642698067	2.00902577399293	1.80506821144126
ENSMUSG00000090185	52.52450990992	37.7849806805358	38.2987871844107	64.7868865699147	68.177160763126	46.5756682950713	16.9376073944374	21.1813464582976	14.1523079666371	35.1786390514651	12.5453974005441	30.1530134133769	51.3579989004964	21.691385280793	1.2379227309772	9.80610812442067e-06	0.00294774723270283	Gm15523	12	103303165	103314316	+	439	lncRNA	predicted gene 15523 [Source:MGI Symbol;Acc:MGI:3782970]	-	50	36	36	79	80	45	16	23	13	34	11	35	10.7440613485302	7.77086245988058	7.80576778723742	13.0932195602612	13.9526608308868	9.48508487784324	3.47617481696013	4.3791262245179	2.91961364273251	7.17876575551193	2.55335976331988
ENSMUSG00000030711	480.074020576669	357.907733668408	451.074604616393	425.625242149186	353.669021458716	386.060539423591	238.185103984276	176.818196521441	300.46438452245	333.162405134464	228.098134555346	317.898912843888	409.068526982161	265.771189593644	0.62154081453346	1.00417004207675e-05	0.00297140191513272	Sult1a1	7	126272037	126275604	-	1507	protein_coding	sulfotransferase family 1A, phenol-preferring, member 1 [Source:MGI Symbol;Acc:MGI:102896]	-	457	341	424	519	415	373	225	192	276	322	200	369	28.606580224634	21.442349395076	26.7812134639317	25.0575141981258	21.084650908055	22.902811966264	14.2401778179013	10.6490808462585	18.0568662859497	19.8051440272387	13.5238575869871
ENSMUSG00000040451	1343.57696349575	1305.68099907185	1263.85997708555	1316.23991069257	1335.42013644773	1323.78399443103	1019.4322450527	982.630290043632	1051.62534582858	1119.50845452016	1003.63179204352	1251.78081398962	1314.76033020408	1071.4348235797	0.294382845591713	1.08309263319482e-05	0.00315563204422207	Sgms1	19	32100127	32367114	-	10546	protein_coding	sphingomyelin synthase 1 [Source:MGI Symbol;Acc:MGI:2444110]	-	1279	1244	1188	1605	1567	1279	963	1067	966	1082	880	1453	11.4405202162604	11.1779935603287	10.7227534547419	11.0731491405491	11.3766081573083	11.2221483496561	8.7093284011332	8.45669758245493	9.03100144369827	9.50987655296308	8.50312866373926
ENSMUSG00000020546	661.808824864993	812.377084631519	832.998621260933	921.777981070685	1071.23363849062	1003.96440547154	474.253007044248	509.273243106025	544.319537178351	722.19676640949	648.939192809961	715.05717523151	884.026759298381	602.339820296598	0.553870982257199	1.24058939851405e-05	0.00351008719570681	Stxbp4	11	90367318	90528910	-	11834	protein_coding	syntaxin binding protein 4 [Source:MGI Symbol;Acc:MGI:1342296]	-	630	774	783	1124	1257	970	448	553	500	698	569	830	5.02194532222917	6.19784395196745	6.2980752302256	6.91064566903027	8.13270994347057	7.58461249794751	3.6107098909983	3.90586936736278	4.16567123789203	5.46712801681962	4.89964423494274
ENSMUSG00000026380	186.987255279315	298.08151425756	263.836089492607	436.28637538221	241.176706199558	436.776267122669	88.9224388207964	52.4929020923027	134.991245220231	188.309185510784	87.8177818038084	149.903552397931	310.52403462232	117.072850974309	1.40746894783125	1.32942565131138e-05	0.00364879173688913	Tfcp2l1	1	118555675	118612898	+	9438	protein_coding	transcription factor CP2-like 1 [Source:MGI Symbol;Acc:MGI:2444691]	CP2	178	284	248	532	283	422	84	57	124	182	77	174	1.77911091734869	2.85147526561675	2.50120538288512	4.1012433467988	2.29582104742383	4.13738281250614	0.84887835445951	0.50479963291832	1.29535338529828	1.78742077189176	0.831370476020554
ENSMUSG00000037762	78.7867648648801	53.528722630759	60.6397463753169	104.971157986697	123.571103883166	84.87121778213	17.9962078565898	38.6789804890652	45.7228411229815	49.6639610138331	51.322080274953	35.3221014270987	84.3947855871582	39.7843620307535	1.09305005655659	1.40573208133367e-05	0.00374954283891508	Slc16a9	10	70080930	70121798	+	3869	protein_coding	solute carrier family 16 (monocarboxylic acid transporters), member 9 [Source:MGI Symbol;Acc:MGI:1914109]	-	75	51	57	128	145	82	17	42	42	48	45	41	1.82862868906879	1.24911576070666	1.40234145587463	2.40710546842705	2.8694644132531	1.96113888419403	0.419079423930173	0.907349717685292	1.07027926804187	1.14994718197549	1.18521633789291
ENSMUSG00000003477	243.713725982029	180.528241029226	315.964994271388	295.231381837586	307.649437943606	423.321074059648	136.559459617652	140.902000353023	155.675387633009	198.655844055333	95.8012165132455	237.778048631201	294.401475853914	160.89532613391	0.868960202271247	1.57173319980164e-05	0.00408174448385595	Inmt	6	55147611	55152028	-	1600	protein_coding	indolethylamine N-methyltransferase [Source:MGI Symbol;Acc:MGI:102963]	-	232	172	297	360	361	409	129	153	143	192	84	276	13.6782645028138	10.1868451843865	17.669087177142	16.370667874238	17.275029186079	23.6535621514115	7.68981468981519	7.99273834571179	8.81175892547204	11.1228641176579	5.34986901319227
ENSMUSG00000022358	9209.64756760538	6521.05791578246	7267.19486824193	9955.85826530081	11642.1024148133	10940.1069750868	3571.71795930199	4369.80386715748	4412.25416836772	6881.56259797925	4912.09332764939	6624.18628958443	9255.99466780511	5128.60303500671	0.851812141802977	2.0238894995059e-05	0.00497771679761594	Fbxo32	15	58039275	58078328	-	6976	protein_coding	F-box protein 32 [Source:MGI Symbol;Acc:MGI:1914981]	-	8767	6213	6831	12140	13661	10570	3374	4745	4053	6651	4307	7689	118.551630117218	84.3968278357603	93.2084874023544	126.618188069093	149.936576349479	140.204432348097	46.1301379052636	56.8530662745135	57.2818036263203	88.3722396389319	62.9147166880163
ENSMUSG00000021215	1001.11715888308	1086.3181945654	1224.49733470158	1128.43994835699	945.958105588373	1085.73057870066	760.075131825379	834.360864835549	1029.85256434144	777.034056695598	671.749006265495	806.377730140594	1078.67688679935	813.241559017343	0.407087531406612	2.07803040835071e-05	0.00502159413570946	Net1	13	3932018	3968220	-	5217	protein_coding	neuroepithelial cell transforming gene 1 [Source:MGI Symbol;Acc:MGI:1927138]	-	953	1035	1151	1376	1110	1049	718	906	946	751	589	936	17.2319751359039	18.7996928928058	21.0006208306467	19.1902873042842	16.2904736828705	18.605779916855	13.1265245190659	14.5154835761216	17.8779143354559	13.3430307206585	11.5047796079493
ENSMUSG00000019577	27735.0422128342	18107.4024083501	20380.2740581043	34554.3729825741	29344.302206959	26449.8045173455	4383.66451377283	6228.23678684638	11695.2495758141	11930.731967719	2106.48627261862	12149.941376253	26095.1997310279	8082.38508217064	1.69091767554038	2.09476152033503e-05	0.00502159413570946	Pdk4	6	5483351	5496309	-	3511	protein_coding	pyruvate dehydrogenase kinase, isoenzyme 4 [Source:MGI Symbol;Acc:MGI:1351481]	-	26402	17252	19157	42135	34433	25555	4141	6763	10743	11531	1847	14103	709.363752154883	465.628829316595	519.366958183385	873.164455686593	750.888760328886	673.501060409454	112.491717523088	161.002531895608	301.676373392224	304.418841120083	53.6068034740672
ENSMUSG00000034898	1806.84314090125	1711.86954138761	1785.14902487336	1938.68607406681	2121.16191424276	2292.55789496851	1170.81211114049	1118.92764986224	1224.71895865129	1920.33982586822	1354.90291925876	1461.9903932143	1942.71126507338	1375.28197633255	0.49847209315923	2.24923202979838e-05	0.00532449452254021	Filip1	9	79712376	79920133	-	5221	protein_coding	filamin A interacting protein 1 [Source:MGI Symbol;Acc:MGI:1917848]	-	1720	1631	1678	2364	2489	2215	1106	1215	1125	1856	1188	1697	31.0769042062754	29.6027126510281	30.5925663151277	32.9441008361093	36.5008328451109	39.2566526588844	20.2044754785711	19.4512149202175	21.2444445921724	32.9503221004486	23.1871084272213
ENSMUSG00000087442	27.3127451531584	27.2891527137203	23.4048143904732	39.3641842450114	17.8965047003206	41.4005940400634	5.29300231076169	4.60464053441252	5.44319537178351	21.727982943552	10.2644160549906	9.47666135848989	29.4446658737912	9.46831642899837	1.64084002987917	2.47991955896891e-05	0.00572740446436015	Gm14453	2	172867478	172876373	-	553	lncRNA	predicted gene 14453 [Source:MGI Symbol;Acc:MGI:3702165]	-	26	26	22	48	21	40	5	5	5	21	9	11	4.43517961056505	4.45532570409267	3.78682465788321	6.31538724503453	2.90754023960094	6.6931119330893	0.862364796928965	0.755734103531472	0.891438579190131	3.51989370811959	1.65844557370982
ENSMUSG00000003810	2811.11177037892	3171.83921157164	3267.09931787015	3414.02289608297	2940.14005790981	3405.19885979521	2253.76038392233	2360.33873793986	3002.46656707579	2575.28331173814	2287.82428959012	2619.86610828798	3168.23535226812	2516.58989975904	0.332227940131518	2.69748528284086e-05	0.00615481642005305	Mast2	4	116163959	116321380	-	8049	protein_coding	microtubule associated serine/threonine kinase 2 [Source:MGI Symbol;Acc:MGI:894676]	-	2676	3022	3071	4163	3450	3290	2129	2563	2758	2489	2006	3041	31.3622474494838	35.5781837954344	36.3174657719803	37.6312256100565	32.8177451568823	37.8222358606805	25.2278291196908	26.6152669540364	33.7830523935328	28.6627829428609	25.3964402332468
ENSMUSG00000041775	549.406373657764	428.229781046072	546.821572577419	629.006860748412	592.289084129657	675.864697704035	370.510161753318	302.985347164344	443.076103263178	503.882271119515	330.742295105252	408.357953084019	570.26972831056	393.259021914938	0.537005477971824	2.84415858064621e-05	0.00641222323812831	Mapk1ip1	7	138437552	138448002	-	1883	protein_coding	mitogen-activated protein kinase 1 interacting protein 1 [Source:MGI Symbol;Acc:MGI:1916796]	-	523	408	514	767	695	653	350	329	407	487	290	474	26.2007886716781	20.5324646975	25.9830689520118	29.6366371854382	28.2596029129562	32.0889930569031	17.7281685019226	14.6039294311424	21.31035288974	23.9725386143538	15.6939232109426
ENSMUSG00000022010	2174.51471027069	2259.75176125538	2381.97179183043	2067.43976003487	1776.01503787943	2038.97925647312	1712.81554776248	1614.38697136503	1795.1658336142	1698.92133301488	1572.73663775911	1850.53350891239	2116.44538629065	1707.42663873802	0.308999428296349	2.93740188906282e-05	0.00654453140883196	Tsc22d1	14	76652401	76745205	+	8994	protein_coding	TSC22 domain family, member 1 [Source:MGI Symbol;Acc:MGI:109127]	TSC22	2070	2153	2239	2521	2084	1970	1618	1753	1649	1642	1379	2148	21.7110315082274	22.6841436223468	23.6962082104094	20.3940670130476	17.7409308015322	20.2677981738571	17.1582021683651	16.29120394864	18.0764991338168	16.9221544744591	15.6241078585557
ENSMUSG00000021948	112.402451207229	139.594511958646	167.025266332013	153.35630112119	121.866674864088	276.348965217423	89.9810392829488	58.9393988404803	125.193493551021	94.154592755392	53.6030616205064	80.9823788816409	161.765695116765	83.8089941553315	0.948810261362415	3.20402750108808e-05	0.00690648946051144	Prkcd	14	30317311	30348167	-	5544	protein_coding	protein kinase C, delta [Source:MGI Symbol;Acc:MGI:97598]	-	107	133	157	187	143	267	85	64	115	91	47	94	1.82063778399895	2.27331522789927	2.69559149631115	2.45415655963003	1.97489671036387	4.45637026529838	1.46231808368131	0.96489687561998	2.04513118483392	1.5214355379793	0.863890069470338
ENSMUSG00000004328	36.767156936944	24.1404043236756	53.1927599783482	44.2847072756379	23.8620062670941	53.8207722520824	5.29300231076169	2.76278432064751	15.2409470409938	19.6586512346423	7.98343470943713	23.2608960617479	39.3446345056304	12.3666192797051	1.66037538341571	3.36202730820633e-05	0.00715394080481027	Hif3a	7	16765432	16796352	-	6710	protein_coding	hypoxia inducible factor 3, alpha subunit [Source:MGI Symbol;Acc:MGI:1859778]	bHLH	35	23	50	54	28	52	5	3	14	19	7	27	0.492049188137605	0.324815359568696	0.7092921134702	0.585538046172445	0.3194972185791	0.717090636169582	0.0710711971239519	0.0373699814533148	0.205708419674814	0.262462019666542	0.106306388737054
ENSMUSG00000021200	20479.3064138778	17903.7833457939	14886.5258075405	17727.0043050035	21668.4061195405	17089.1302048872	12810.1241925054	13325.8297065898	16382.929429994	12599.1261096968	14772.775684477	14781.0071752374	18292.3593661072	14111.9653830834	0.374370254907307	3.62991945069878e-05	0.00763815717303706	Asb2	12	103287401	103322260	-	3542	protein_coding	ankyrin repeat and SOCS box-containing 2 [Source:MGI Symbol;Acc:MGI:1929743]	-	19495	17058	13993	21616	25426	16511	12101	14470	15049	12177	12953	17157	519.203579669299	456.363387273686	376.04509141062	444.028303870415	549.618137816242	431.338326040107	325.850844349152	341.463369869538	418.895444695791	318.659694054019	372.653885767414
ENSMUSG00000039633	554.658824648756	489.105583253602	402.137265436312	533.876748822968	698.815897822041	559.943034391858	339.810748350901	384.947948676887	315.705331563444	280.394446557266	395.750263453526	479.002155938216	539.756225729256	365.93514909004	0.56027261051747	3.90201200295219e-05	0.00768576112153326	Lonrf1	8	36683218	36716670	-	3930	protein_coding	LON peptidase N-terminal domain and ring finger 1 [Source:MGI Symbol;Acc:MGI:3609241]	-	528	466	378	651	820	541	321	418	290	271	347	556	12.6737275730204	11.2363331698304	9.15539099625214	12.0523661703465	15.9754416218277	12.7379031574944	7.79037975558531	8.89012524008722	7.27531831779752	6.39163735344633	8.99747751158472
ENSMUSG00000024750	7074.00099466803	6523.15708137583	6519.30466294635	6831.32614085303	7564.25598666883	7184.038080802	5671.98127621223	5769.61458961889	6618.92557208875	5915.18468991842	5748.07299079473	5635.16744962567	6949.34715788568	5893.15776137645	0.238054531997955	3.92579252059386e-05	0.00768576112153326	Zfand5	19	21249642	21264204	+	10751	protein_coding	zinc finger, AN1-type domain 5 [Source:MGI Symbol;Acc:MGI:1278334]	-	6734	6215	6128	8330	8876	6941	5358	6265	6080	5717	5040	6541	59.0863612763837	54.7801873019597	54.2559711631058	56.3741516106624	63.2120685260019	59.7401640078778	47.5335219387183	48.7075585474736	55.7572402287457	49.2895344314096	47.7711306172875
ENSMUSG00000025723	50.4235295135232	57.7270538174852	58.512035976183	70.5274967723122	57.9505866486571	80.7311583781236	13.7618060079804	11.9720653894726	32.6591722307011	53.8026244316526	17.107360091651	30.1530134133769	62.6453101843807	26.5760069274724	1.23796383525071	3.96955694769818e-05	0.00768576112153326	Nmb	7	80551975	80554824	-	793	protein_coding	neuromedin B [Source:MGI Symbol;Acc:MGI:1915289]	-	48	55	55	86	68	78	13	13	30	52	15	35	5.70993343597045	6.57235092103883	6.6018727484534	7.89058392705318	6.56549229387821	9.10153499753701	1.56356633672694	1.37023265328821	3.72987793915871	6.07806782385677	1.92753342215538
ENSMUSG00000026170	1395.05098320748	1495.65548527121	1572.37798495997	1268.67485472985	1469.21781444536	1571.15254382041	935.802808542667	887.774695034734	1377.12842906123	1216.76704483891	1097.15202721122	1101.01574692273	1462.02161107238	1102.60679193525	0.407185589498699	4.0707034559967e-05	0.0077869678838046	Cyp27a1	1	74752733	74777051	+	2173	protein_coding	cytochrome P450, family 27, subfamily a, polypeptide 1 [Source:MGI Symbol;Acc:MGI:88594]	-	1328	1425	1478	1547	1724	1518	884	964	1265	1176	962	1278	57.6502697993771	62.142164996418	64.7429306975342	51.7981760013215	60.7447998884322	64.6405842692078	38.8006217863155	37.080147696254	57.3954349636042	50.1629398771502	45.1127385067031
ENSMUSG00000031626	2722.87059373025	3017.55054045945	2983.04997958577	2436.47898733185	3199.21326880969	3247.87660244297	1712.81554776248	1739.63319390105	3026.41662671163	1919.30516001376	1779.1654495317	2218.40027255559	2934.50666206	2065.95604174604	0.506294892776108	4.15373949949859e-05	0.00778707121460124	Sorbs2	8	45960825	46280943	+	28634	protein_coding	sorbin and SH3 domain containing 2 [Source:MGI Symbol;Acc:MGI:1924574]	-	2592	2875	2804	2971	3754	3138	1618	1889	2780	1855	1560	2575	8.53917614008266	9.51452409157797	9.32123882671206	7.54926222196782	10.0379220355462	10.1406115466377	5.38942761410476	5.51409298057369	9.5721462969348	6.00478246672237	5.55170553859045
ENSMUSG00000086938	167.027941513546	204.668645352902	170.216831930714	202.561531427455	165.32961485058	252.543623644387	49.7542217211599	84.7253858331904	138.257162443301	139.679890351406	67.2889496938272	145.595979053163	193.724698119931	104.216931516008	0.89162862113004	5.06221996638183e-05	0.00904418129465463	4930481A15Rik	19	5456768	5472875	+	2652	lncRNA	RIKEN cDNA 4930481A15 gene [Source:MGI Symbol;Acc:MGI:1922181]	-	159	195	160	247	194	244	47	92	127	135	59	169	5.65570306326363	6.96774636414945	5.74280552806641	6.7765291854144	5.60092530318301	8.51352733178361	1.69032605105435	2.89960243222226	4.72146477036969	4.71840955217388	2.26705646612328
ENSMUSG00000019961	1069.39902176597	1237.45811728755	1204.2840859098	1143.20151744887	1419.7893728921	1597.02791509545	768.543935522598	911.718825813679	1077.75268361314	933.268600718281	788.079054888722	1121.69209897762	1278.52667173329	933.50919992234	0.453144464468	5.91336276469353e-05	0.0101806603670696	Tmpo	10	90983433	91017177	-	10998	protein_coding	thymopoietin [Source:MGI Symbol;Acc:MGI:106920]	-	1018	1179	1132	1394	1666	1543	726	990	990	902	691	1302	8.73166485684824	10.1585408530022	9.79738914735018	9.22216605713673	11.5982603229326	12.9821146052794	6.29606281035546	7.52394525659893	8.87499325239536	7.60200599664137	6.40247921806711
ENSMUSG00000031596	1809.99461149584	1954.32316742104	2056.43210076294	2753.03263563549	2842.98760382235	2497.49083546683	1311.60597260675	1330.74111444522	1477.28322390205	2294.88886518087	1510.00965075639	1603.2787989227	2319.04349243408	1587.96793763566	0.54672021626306	6.11926969702429e-05	0.0103469152714714	Slc7a2	8	41315433	41375345	+	9135	protein_coding	solute carrier family 7 (cationic amino acid transporter, y+ system), member 2 [Source:MGI Symbol;Acc:MGI:99828]	-	1723	1862	1933	3357	3336	2413	1239	1445	1357	2218	1324	1861	17.7926125272998	19.3153404191165	20.1419238255441	26.7378614869874	27.9607657327273	24.4422959476823	12.9362649330581	13.2215826189479	14.6459601540107	22.5054849598296	14.7694144936358
ENSMUSG00000032942	5453.0946188479	4846.97335507539	5329.91454983049	7416.0482943258	6125.71789456687	7990.31464973224	1112.58908572211	1911.84674988808	4373.06316169087	3039.84828038837	997.929338679641	3006.68619464816	6193.67722706311	2406.9938018362	1.36354429105047	6.37819511008394e-05	0.0105956367539272	Ucp3	7	100122197	100135639	+	3135	protein_coding	uncoupling protein 3 (mitochondrial, proton carrier) [Source:MGI Symbol;Acc:MGI:1099787]	-	5191	4618	5010	9043	7188	7720	1051	2076	4017	2938	875	3490	156.198363381414	139.587852265114	152.117026524651	209.874108930333	175.550509318222	227.862565711862	31.9750562723767	55.3495318283272	126.331263237738	86.8659616631549	28.4416215480716
ENSMUSG00000057335	390.782353729805	374.701058415313	367.030043850602	402.662801339596	381.792100273505	386.060539423591	248.7711086058	231.152954827509	401.707818437623	267.978456303808	193.883414372044	246.393195320737	383.838149505402	264.98115797792	0.535743059679132	6.54286502047869e-05	0.0107746763267674	Cep170	1	176561219	176641633	-	18049	protein_coding	centrosomal protein 170 [Source:MGI Symbol;Acc:MGI:1918348]	-	372	357	345	491	448	373	235	251	369	259	170	286	1.94425305635301	1.87433110683242	1.81946454438234	1.97930274407344	1.90044996324739	1.91226869262341	1.24182633037735	1.16237088783289	2.01567158461744	1.33009299059661	0.959797516541146
ENSMUSG00000035860	25.2117647567616	28.3387355104018	58.512035976183	59.8663635392882	20.4531482289378	49.6807128480761	5.29300231076169	2.76278432064751	26.1273377845609	11.3813243990034	11.4049067277673	18.9533227169798	40.3437934766081	12.6537797099534	1.67532595918986	7.08237217525855e-05	0.0114637576286365	Cdhr3	12	33083795	33142874	-	4569	protein_coding	cadherin-related family member 3 [Source:MGI Symbol;Acc:MGI:1916014]	-	24	27	55	73	24	48	5	3	24	11	10	22	0.495510747945346	0.559981716987454	1.14582733410452	1.16248024592726	0.402181096832522	0.97210529192341	0.104374640556296	0.0548812815827845	0.517888939505862	0.22315514936572	0.223029693407634
ENSMUSG00000073375	1879.32696457694	1689.82830265729	2226.64893269365	1826.33413153418	1620.05978263378	2449.88015232075	757.957930901074	898.825832317324	1141.98238900018	1144.34043502707	965.995599841892	1796.25808476831	1948.67971106943	1117.56004530931	0.801669306611807	7.28651475612509e-05	0.0115959677690334	Lrrc30	17	67937959	67939718	-	1760	protein_coding	leucine rich repeat containing 30 [Source:MGI Symbol;Acc:MGI:2685172]	-	1789	1610	2093	2227	1901	2367	716	976	1049	1106	847	2085	95.8872068790513	86.6850990848957	113.196815003851	92.0643367573937	82.6991450081496	124.445391447858	38.8013200698216	46.3512336625948	58.763732440052	58.2475744040229	49.0404659542624
ENSMUSG00000021356	43.0700981261344	34.6362322904911	70.2144431714196	31.9833996990718	15.3398611717033	33.1204752320507	13.7618060079804	11.9720653894726	16.3295861153505	22.7626487980069	9.12392538221386	13.784234703258	38.0607516151452	14.6223777327137	1.37288808903899	7.71292727726314e-05	0.012149996577558	Irf4	13	30933209	30950959	+	4903	protein_coding	interferon regulatory factor 4 [Source:MGI Symbol;Acc:MGI:1096873]	IRF	41	33	66	39	18	32	13	13	15	22	8	16	0.788832797112768	0.637798198700851	1.28132614877182	0.578744122279131	0.281087920369334	0.603922643116195	0.252887641245047	0.221618293709474	0.301630961223012	0.415906945727911	0.166269250528979
ENSMUSG00000033478	513.689706919018	512.196404780596	500.011943796473	601.123896908196	537.747355519156	607.553717537931	422.381584398783	395.078157852594	464.848884750312	462.495636941321	353.552108560787	460.048833221237	545.387170910228	426.400867620839	0.355118277326557	7.87555360353542e-05	0.0122251831265372	Fhip2a	19	57349112	57378018	+	5951	protein_coding	FHF complex subunit HOOK interacting protein 2A [Source:MGI Symbol;Acc:MGI:2147545]	-	489	488	470	733	631	587	399	429	427	447	310	534	7.75143133507084	7.7707173701205	7.51770975718692	8.96185481567349	8.11840998173233	9.12728011137645	6.39483130055403	6.02547778590139	7.07431635499058	6.96230361926998	5.30830158705492
ENSMUSG00000073489	54.6254903063168	69.2724645809822	51.0650495792143	54.9458405086618	40.9062964578756	31.0504455300476	25.4064110916561	29.4696994202401	25.0386987102042	32.0746414881006	18.2478507644277	25.8454400686088	50.3109311605164	26.0137902572063	0.945567719316538	8.13786944155498e-05	0.0125296724783877	Ifi204	1	173574859	173594509	-	3561	protein_coding	interferon activated gene 204 [Source:MGI Symbol;Acc:MGI:96429]	-	52	66	48	67	48	30	24	32	23	31	16	30	1.37750874734202	1.75631820737449	1.28305983659917	1.36894723401534	1.0320502282661	0.779547367101597	0.64281413001074	0.751107593153211	0.636799061427648	0.806910015087978	0.457859104377188
ENSMUSG00000054204	8.40392158558721	10.4958279668155	8.51084159653571	5.7406102023975	11.931003133547	5.17507425500793	0	0	1.0886390743567	2.06933170890971	1.14049067277673	1.72302933790725	8.37621312331515	1.00358179899173	3.05731039218586	8.28351376482386e-05	0.0126510631998576	Alkal2	12	30934321	30943853	+	1509	protein_coding	ALK and LTK ligand 2 [Source:MGI Symbol;Acc:MGI:3697448]	-	8	10	8	7	14	5	0	0	1	2	1	2	0.500107931822904	0.627974490075762	0.50463619153188	0.337514689992388	0.710346698696409	0.306601300447182	0	0	0.0653367176000189	0.122850277420564	0.0675296666122916
ENSMUSG00000019278	210.09803963968	194.172817386087	292.560179880915	237.825279813611	267.595355995269	269.103861260412	168.317473482222	162.083346811321	202.486867830347	183.13585623851	116.330048623227	179.195051142354	245.225922329329	168.591440687997	0.539542705693144	8.70410731313184e-05	0.0131870707436873	Dpep1	8	123912981	123928551	+	2486	protein_coding	dipeptidase 1 [Source:MGI Symbol;Acc:MGI:94917]	-	200	185	275	290	314	260	159	176	186	177	102	208	7.5891278069264	7.05183018994369	10.5295355782855	8.48751887642622	9.67074861672579	9.67755062087268	6.10017292836469	5.91746490977563	7.37663631362337	6.59944673111239	4.18102623718049
ENSMUSG00000063145	58.8274510991104	59.8262194108483	63.8313119740178	95.1301119254443	75.8470913489776	76.5910989741173	49.7542217211599	50.6510458785377	33.7478113050578	30.0053097791909	42.1981548927391	44.7987627855886	71.6755474554193	41.8592177270457	0.777938847425681	8.96517207864481e-05	0.0132642522519825	Bbs5	2	69477515	69497915	+	2445	protein_coding	Bardet-Biedl syndrome 5 (human) [Source:MGI Symbol;Acc:MGI:1919819]	-	56	57	60	116	89	74	47	55	31	29	37	52	2.16058899134778	2.20916031962726	2.33587734055707	3.45193814753302	2.78703686770746	2.80056775588835	1.83343340997797	1.88021699459384	1.25005575157926	1.09939693051152	1.54207929487283
ENSMUSG00000033209	600.880393369485	627.650512415566	630.866133343209	647.868865699147	678.362749593103	662.409504641014	436.143390406763	514.79881174732	428.923795296541	609.418188273911	513.22080274953	530.693036075434	641.339693176921	505.533004091583	0.34292032051547	9.09051963429516e-05	0.0132826037776696	Ttc28	5	111027669	111437646	+	12315	protein_coding	tetratricopeptide repeat domain 28 [Source:MGI Symbol;Acc:MGI:2140873]	-	572	598	593	790	796	640	412	559	394	589	450	616	4.38151807893905	4.60148498825454	4.58350726473622	4.6674164733696	4.94891759174626	4.80882293008316	3.19086879209269	3.79403680426104	3.15433894455711	4.43318917668189	3.72359075217837
ENSMUSG00000041653	91.3926472432609	95.512034498021	122.343347950201	114.81220404795	101.41352663515	167.672405862257	37.0510161753318	39.5999085959477	88.1797650228929	97.2585903187566	31.9337388377485	52.5523948061712	115.524361039473	57.7625689594748	1.00060854366998	9.11785030677499e-05	0.0132826037776696	Pnpla3	15	84052038	84071437	+	1548	protein_coding	patatin-like phospholipase domain containing 3 [Source:MGI Symbol;Acc:MGI:2151796]	-	87	91	115	140	119	162	35	43	81	94	28	61	5.30165290806737	5.57059618880579	7.07138577983565	6.58022825837873	5.88582812069088	9.68360991017019	2.15646907552456	2.32178310696058	5.15894163794103	5.62849497771233	1.84319345846417
ENSMUSG00000022807	409.691177297376	390.444800365536	426.605935026352	406.763237198452	429.516112807694	454.371519589696	333.459145577987	319.562053088229	280.868881184029	393.173024692846	309.072972322494	342.882838243543	419.565463714184	329.836485851521	0.345987270579649	9.81897966890921e-05	0.0139791073680113	Osbpl11	16	33005441	33063682	+	5091	protein_coding	oxysterol binding protein-like 11 [Source:MGI Symbol;Acc:MGI:2146553]	-	390	372	401	496	504	439	315	347	258	380	271	398	7.22644173436204	6.92422361137398	7.49754226138441	7.08863245869358	7.57982205067446	7.97911365478438	5.9013803103925	5.69705648637822	4.99646858563633	6.91856276551758	5.42437916612923
ENSMUSG00000074165	175.431863099133	189.97448619936	218.090315911228	235.365018298298	217.314699932464	196.652821690301	146.086863777023	142.743856566788	175.270890971429	151.061214750409	148.263787460975	155.072640411653	205.471534188464	153.083208989713	0.428517700711143	9.93912240760142e-05	0.0139791073680113	Zfp788	7	41282627	41300954	+	4346	protein_coding	zinc finger protein 788 [Source:MGI Symbol;Acc:MGI:1914857]	zf-C2H2	167	181	205	287	255	190	138	155	161	146	130	180	3.62484753633132	3.94657258398304	4.48995290696702	4.80480818111806	4.4924373467373	4.04535935808613	3.02855532042508	2.98102847143121	3.65243677041118	3.11385596176187	3.04815800720967
ENSMUSG00000022579	570.416177621732	468.113927319971	479.798695004701	552.738753773702	421.846182221842	451.266475036691	286.880725243284	279.962144492281	376.669119727419	397.311688110665	304.511009631388	453.156715869607	490.696701829773	349.748567179107	0.487250577845739	0.000100768687433862	0.0139791073680113	Gpihbp1	15	75468477	75471330	+	2554	protein_coding	GPI-anchored HDL-binding protein 1 [Source:MGI Symbol;Acc:MGI:1915703]	-	543	446	451	674	495	436	271	304	346	384	267	526	20.0558896795504	16.5479883893441	16.808667867695	19.2009573605436	14.8393841124504	15.7964255282233	10.1203269821586	9.94894061181541	13.3567795509069	13.9362432171125	10.6530560951809
ENSMUSG00000024843	70.3828432792929	76.6195441577531	74.4698639696875	99.2305477842997	63.0638737058915	92.1163217391411	55.0472240319216	42.3626929165952	39.1910066768413	43.455965887104	25.0907948010881	63.7520855025684	79.3138324393443	44.8166283026864	0.815651717645895	0.000101126713983396	0.0139791073680113	Chka	19	3901773	3944369	+	12024	protein_coding	choline kinase alpha [Source:MGI Symbol;Acc:MGI:107760]	-	67	73	70	121	74	89	52	46	36	42	22	74	0.525640513047769	0.57531425401926	0.554149211072776	0.732184081016778	0.471209809289951	0.684911198459032	0.412477746182457	0.319766535689181	0.295188942689906	0.323769331435484	0.186447926829246
ENSMUSG00000074170	162.825980720752	205.718228149584	232.984288705165	235.365018298298	121.866674864088	246.333534538377	130.207856844738	100.381163650193	145.877635963798	130.367897661312	118.61102996878	144.734464384209	200.848954212711	128.363341412172	0.644821095632032	0.000106892315883742	0.0145635012820598	Plekhf1	7	37916396	37927440	-	5263	protein_coding	pleckstrin homology domain containing, family F (with FYVE domain) member 1 [Source:MGI Symbol;Acc:MGI:1919537]	-	155	196	219	287	143	238	123	109	134	126	104	168	2.77818603253178	3.52901856512954	3.96084996322753	3.96764133671653	2.08033960901715	4.1844348943645	2.22904013385184	1.7310805456419	2.51025580828984	2.21907796381166	2.01364920377476
ENSMUSG00000085411	111.35196100903	134.346597975238	137.237320744138	143.515255059938	155.955255245651	138.691990034212	50.8128221833122	37.7580523821827	113.218463733097	105.535917154395	23.9503041283114	70.6442028541974	136.849730011368	66.9866270725827	1.03151255750431	0.000110026819810608	0.0148834850969521	Gm14319	2	167700505	167704462	+	703	lncRNA	predicted gene 14319 [Source:MGI Symbol;Acc:MGI:3649450]	-	106	128	129	175	183	134	48	41	104	102	21	82	14.2237311747512	17.2538447663035	17.4667470981129	18.1120080796058	19.9309195087296	17.6377304575314	6.51226491313867	4.87475372101538	14.5856089804788	13.4486977240529	3.04402219811793
ENSMUSG00000027397	255.269118162211	278.139441120611	257.452958295205	287.850597291646	329.807015191622	249.438579091382	193.723884573878	247.729660751394	220.993732094411	193.482514783058	193.883414372044	205.040491210963	276.32628485878	209.142282964291	0.402932618324157	0.000144795048244703	0.0187302275632103	Slc20a1	2	129040684	129053536	+	5580	protein_coding	solute carrier family 20, member 1 [Source:MGI Symbol;Acc:MGI:108392]	-	243	265	242	351	387	241	183	269	203	187	170	238	4.10804384400415	4.50031503519617	4.12818179102215	4.57674585731384	5.31016892146473	3.9964655316246	3.12797330051664	4.02941713401545	3.5868101599034	3.10629568399347	3.1045493505468
ENSMUSG00000051726	63.029411891904	37.7849806805358	78.7252847679553	116.452378391492	98.8568831065326	96.2563811431474	23.2892101673514	16.5767059238851	52.2546755691217	64.1492829762011	14.8263787460975	34.4605867581451	81.8508866635946	34.2594733568003	1.26012411515401	0.000145387234755091	0.0187302275632103	Kcnf1	12	17222101	17226889	-	4789	protein_coding	potassium voltage-gated channel, subfamily F, member 1 [Source:MGI Symbol;Acc:MGI:2687399]	-	60	36	74	142	116	93	22	18	48	62	13	40	1.18186918321272	0.71234258089112	1.4708369430883	2.15738366918799	1.85457637333494	1.7969307454941	0.438151184775017	0.314160670977334	0.988195683692747	1.20000274116863	0.276619225294075
ENSMUSG00000074623	27.3127451531584	18.8924903402679	23.4048143904732	30.3432253555297	6.8177160763126	17.5952524670269	6.35160277291403	6.44649674817753	7.62047352049692	10.3466585445486	6.84294403666039	4.30757334476813	20.7277072971281	6.98595816126093	1.57662502151115	0.00015976364037288	0.0203060659153128	Gm826	2	160153313	160176082	-	1493	protein_coding	predicted gene 826 [Source:MGI Symbol;Acc:MGI:2685672]	-	26	18	22	37	8	17	6	7	7	10	6	5	1.64276913907734	1.14246772266831	1.40262159129901	1.80312483842168	0.410262431665058	1.0536159625414	0.383298914428708	0.391888374383165	0.462258371070998	0.620834121324955	0.409520161760005
ENSMUSG00000045094	113.452941405427	157.437419502232	104.257809557562	145.975516575251	126.127747411783	152.147183097233	103.742845290929	84.7253858331904	111.041185584384	84.8426000652983	80.974837767148	73.2287468610582	133.233102924915	89.7592669003346	0.574253281023654	0.000169764860753046	0.0214333795529412	Arhgef37	18	61624728	61669665	-	5870	protein_coding	Rho guanine nucleotide exchange factor (GEF) 37 [Source:MGI Symbol;Acc:MGI:3045339]	-	108	150	98	178	148	147	98	92	102	82	71	85	1.7355960363084	2.4214995882223	1.58915266771971	2.20630617574435	1.93043500746248	2.31724770933885	1.59233382639756	1.31000777687452	1.71320219753998	1.29482518121514	1.23254871399903
ENSMUSG00000039911	169.128921909943	144.842425942054	189.36622552292	192.720485366202	111.640100749619	191.477747435293	93.1568406694058	116.036941467196	142.611718740728	82.7732683563886	104.925141895459	112.858421632925	166.529317821005	108.72705546035	0.613653711250958	0.000172757039758566	0.0216667074102498	Spsb1	4	149980740	150039500	-	4396	protein_coding	splA/ryanodine receptor domain and SOCS box containing 1 [Source:MGI Symbol;Acc:MGI:1921896]	-	161	138	178	235	131	185	88	126	131	80	92	131	3.45486584191431	2.97476487175516	3.85425074834639	3.88950252800113	2.28162981040568	3.89410154865048	1.90928664593954	2.39572524412493	2.93805664205053	1.68681591107945	2.1326225105667
ENSMUSG00000022416	22.0602941621664	29.3883183070834	68.0867327722857	23.7825279813611	43.4629399864928	91.0813068881395	16.9376073944374	9.20928106882504	28.3046159332743	22.7626487980069	4.56196269110693	13.784234703258	46.3103533495881	15.9267250981514	1.53956886765939	0.000182874640281474	0.022679102555623	Cacna1i	15	80171439	80282480	+	9862	protein_coding	calcium channel, voltage-dependent, alpha 1I subunit [Source:MGI Symbol;Acc:MGI:2178051]	-	21	28	64	29	51	88	16	10	26	22	4	16	0.200871023265261	0.269044596985207	0.617721365257843	0.213952260462336	0.395946718899216	0.825678359135717	0.154739479278594	0.0847537942106883	0.259929099403685	0.206772637893323	0.0413312784092265
ENSMUSG00000043065	141.816176756784	155.338253908869	146.812017540241	152.536213949419	187.487192098596	129.376856375198	87.8638383586441	130.771791177316	118.661659104881	100.362587882121	82.1153284399247	110.273877626064	152.227785104851	105.008180431492	0.534126185846982	0.000185862055969738	0.0228562052984085	Spice1	16	44167484	44208860	+	5416	protein_coding	spindle and centriole associated protein 1 [Source:MGI Symbol;Acc:MGI:1196252]	-	135	148	138	186	220	125	83	142	109	97	72	128	2.35135448973649	2.58949037698671	2.42537042552118	2.49872330921406	3.11010889735748	2.13562297994275	1.46165737866479	2.19146145546205	1.9842408876604	1.66007788560564	1.35468301663446
ENSMUSG00000038335	413.89313809017	407.238125112441	410.648107032848	442.026985584608	483.205626908655	479.211876013734	357.80695620749	370.213098966767	339.655391199291	369.375710040384	356.973580579117	361.836160960523	439.370643123743	359.310149658929	0.291112178540224	0.000188179007798815	0.0229918325786707	Tsr1	11	74788897	74800168	+	3837	protein_coding	TSR1 20S rRNA accumulation [Source:MGI Symbol;Acc:MGI:2144566]	-	394	388	386	539	567	463	338	402	312	357	313	420	9.68651193750261	9.58233099148914	9.57575778688885	10.2207048147734	11.3141733952259	11.165609110218	8.4017750144999	8.75706153868478	8.01695317691678	8.6240606593777	8.31259044704657
ENSMUSG00000027272	955.946080360545	1043.28529990146	967.04437640637	1115.31855360866	1113.84436396757	1071.24037078664	783.36434199273	876.723557752144	873.088537634076	950.857920244014	874.756346019754	902.8673730634	1044.44650750521	876.943012784353	0.252924142981129	0.000191400275567515	0.0232355026839589	Ubr1	2	120690750	120801196	-	9889	protein_coding	ubiquitin protein ligase E3 component n-recognin 1 [Source:MGI Symbol;Acc:MGI:1277977]	-	910	994	909	1360	1307	1035	740	952	802	919	767	1048	8.68064529906832	9.52500580939609	8.74961922131459	10.006228383485	10.1194004233497	9.68458914061919	7.13716093031188	8.04653156454171	7.99592190317116	8.61387410601645	7.90363421236385
ENSMUSG00000059890	939.13823718937	1099.96277092226	990.449190796843	1193.22683492691	1159.01173297314	1083.66054899866	804.536351235777	847.253858331904	995.016113962026	937.407264136101	849.665551218666	863.237698291534	1077.57488596786	882.852806196001	0.288899541273187	0.000202325739336616	0.0241531333634863	Ube4a	9	44834425	44876898	-	8639	protein_coding	ubiquitination factor E4A [Source:MGI Symbol;Acc:MGI:2154580]	-	894	1048	931	1455	1360	1047	760	920	914	906	745	1002	9.76196036858955	11.4955313553593	10.2580273776351	12.2541558344028	12.0533288321459	11.2144101494713	8.3906627353468	8.90119880802574	10.431079947749	9.72075750530352	8.78772877113916
ENSMUSG00000023977	2638.83137787438	2496.95747330541	2513.88983657673	3209.0011031402	3177.90790607121	2995.33297879859	2205.06476266332	2306.00397963379	2144.6189764827	2468.71272872929	2420.12120763223	2417.41016108388	2838.65344596109	2326.98863603753	0.287214129313711	0.000202785310211972	0.0241531333634863	Ubr2	17	47239221	47321482	-	9814	protein_coding	ubiquitin protein ligase E3 component n-recognin 2 [Source:MGI Symbol;Acc:MGI:1861099]	-	2512	2379	2363	3913	3729	2894	2083	2504	1970	2386	2122	2806	24.1455207768412	22.9709856291254	22.9189815412938	29.0099963280996	29.0922894750452	27.2863660630256	20.243675305027	21.3261479920373	19.7909537916348	22.5351146191934	22.0334838394014
ENSMUSG00000028841	1284.74951239664	1307.78016466521	1413.86356022449	1464.67568878313	1268.94740470368	1617.72821211548	962.267820096476	957.765231157805	1274.7963560717	1288.1589887963	1056.09436299125	1050.18638145447	1392.95742381477	1098.211523428	0.343365884480263	0.000206523052336124	0.0244445847821344	Cnksr1	4	133955352	133965710	-	2804	protein_coding	connector enhancer of kinase suppressor of Ras 1 [Source:MGI Symbol;Acc:MGI:2670958]	-	1223	1246	1329	1786	1489	1563	909	1040	1171	1245	926	1219	41.1444672313967	42.1086457875645	45.1153798727583	46.3433393935473	40.6582104047192	51.57915188244	30.9194685467804	31.0012694452939	41.1742254390941	41.1553905922613	33.6524604729029
ENSMUSG00000031785	710.131373982119	638.146340382382	661.717934130651	697.894183177182	540.303999047773	690.354905618057	423.440184860935	499.143033930317	580.244626632123	386.965029566117	351.271127215234	607.367841612307	656.424789389694	474.738640636172	0.465591786427779	0.00022252875862194	0.025696644090136	Adgrg1	8	95701379	95740845	+	5421	protein_coding	adhesion G protein-coupled receptor G1 [Source:MGI Symbol;Acc:MGI:1340051]	-	676	608	622	851	634	667	400	542	533	374	308	705	11.7633300942085	10.628094657052	10.9216592902472	11.4217863542819	8.95450165656107	11.3851735363951	7.03763486739299	8.35687732577288	9.69380666953374	6.39480904507786	5.78968791933739
ENSMUSG00000027868	4188.30442021702	4669.59386243621	4887.35078681063	5358.44958035218	5008.46467256114	5480.40363605339	3472.20951585967	3974.72570930489	4034.49640956594	4441.8205131747	3809.23884707429	4461.78447051083	4932.09449307176	4032.37924424839	0.29053198747232	0.000228887083071803	0.025969595627727	Tbx15	3	99147697	99261575	+	3747	protein_coding	T-box 15 [Source:MGI Symbol;Acc:MGI:1277234]	T-box	3987	4449	4594	6534	5877	5295	3280	4316	3706	4293	3340	5179	100.374995302391	112.514878197964	116.7037858227	126.875952780323	120.089093947393	130.760176876144	83.4903529896788	96.2768540237808	97.5142925052938	106.197081347534	90.8336192970233
ENSMUSG00000025316	97.6955884324513	142.743260348691	112.768651154098	141.875080716395	206.235911308456	170.777450415262	85.7466374343394	96.697451222663	101.243433915173	85.8772659197531	110.627595259343	81.8438935505945	145.349323729226	93.6727128836444	0.639365870654397	0.00024148840816087	0.0270609909689382	Banp	8	122676489	122755997	+	6632	protein_coding	BTG3 associated nuclear protein [Source:MGI Symbol;Acc:MGI:1889023]	-	93	136	106	173	242	165	81	105	93	83	97	95	1.32282205270339	1.94323638044795	1.52138452541259	1.89795305069238	2.79384571274079	2.3021448972208	1.16489464260673	1.32333234986595	1.38256316915468	1.16002930459088	1.49042821034996
ENSMUSG00000071036	9.45441178378561	8.39666237345239	11.7024071952366	16.4017434354214	5.96550156677352	3.10504455300476	2.11720092430468	0	3.26591722307011	1.03466585445486	2.28098134555346	0	9.17096181794572	1.44979422456385	2.73646028281364	0.000245830630978012	0.0273855322909505	Gm10309	17	86805160	86812660	-	2005	protein_coding	predicted gene 10309 [Source:MGI Symbol;Acc:MGI:3641941]	-	9	8	11	20	7	3	2	0	3	1	2	0	0.423439265716138	0.378100151830155	0.522222951573421	0.725770811825457	0.267310017040619	0.138452278017396	0.0951396972971007	0	0.147520858142287	0.0462296929245964	0.101648146551569
ENSMUSG00000055322	7450.07648562306	8097.53127639815	8111.8958966981	8440.33717186787	7646.92079409412	9137.11110464199	5799.01333167051	6032.0791000804	6921.56723475992	7719.64194008769	5426.45462107169	7311.67499540943	8147.31212155388	6535.07187051327	0.318017191687991	0.000257504230443047	0.0283524134658745	Tns1	1	73949390	74163608	-	16465	protein_coding	tensin 1 [Source:MGI Symbol;Acc:MGI:104552]	-	7092	7715	7625	10292	8973	8828	5478	6550	6358	7461	4758	8487	40.632167232041	44.4022969639853	44.0814386523667	45.4801535274574	41.7260720118474	49.6128090743361	31.7326571483754	33.2509235725056	38.0719692320612	42.002069633488	29.4473723653566
ENSMUSG00000066687	2433.98578922569	1975.31482335468	2340.48143904732	2742.37150240246	2618.00297330404	3295.48728558905	628.808674518489	593.077700832333	1563.28571077623	1746.5159623198	1294.45691360159	1623.95515097759	2567.60730215387	1241.683352171	1.04816708135508	0.00026345743867951	0.028519180882944	Zbtb16	9	48565597	48747522	-	5283	protein_coding	zinc finger and BTB domain containing 16 [Source:MGI Symbol;Acc:MGI:103222]	ZBTB	2317	1882	2200	3344	3072	3184	594	644	1436	1688	1135	1885	41.3721812358699	33.7574979632175	39.6387286732807	46.0542312839521	44.5217443162517	55.7680779027581	10.723880871657	10.1889493756907	26.7991106281854	29.6160556353816	21.8926884254914
ENSMUSG00000026473	9067.8313908486	9583.74051649923	10877.9194155722	11157.2859719454	10895.5625044571	13725.331939132	3758.0316406408	4821.97956763679	8934.46088324546	6072.45389979556	3489.9014586968	8137.86756293595	10884.6119564091	5869.11583549189	0.89104365398526	0.000263536627654198	0.028519180882944	Glul	1	153775690	153785469	+	3782	protein_coding	glutamate-ammonia ligase (glutamine synthetase) [Source:MGI Symbol;Acc:MGI:95739]	-	8632	9131	10225	13605	12785	13261	3550	5236	8207	5869	3060	9446	215.304398673004	228.785270199435	257.347195040518	261.734457287746	258.827715062625	324.450149468651	89.5267821835588	115.718357622856	213.948606025151	143.83943571861	82.4486876702593
ENSMUSG00000032495	2072.61716104544	2072.92602344606	1803.234563266	1995.27208891902	1905.55164332937	1554.59230620438	1548.73247612887	1714.76813501522	1544.77884651216	1677.19335007132	1399.38205549705	1420.63768910453	1900.69896436838	1550.91542538819	0.293416293586817	0.000296862739649831	0.0317626359519125	Lrrc2	9	110780613	110813134	+	3757	protein_coding	leucine rich repeat containing 2 [Source:MGI Symbol;Acc:MGI:1921499]	-	1973	1975	1695	2433	2236	1502	1463	1862	1419	1621	1227	1649	49.5391882078541	49.8146572640549	42.9443619267907	47.1177771129695	45.5682315751991	36.9932055516075	37.1406309791117	41.4250107068889	37.2381204770056	39.9923758644385	33.2802985116641
ENSMUSG00000020427	300.440196684743	241.404043236756	382.987871844107	292.771120322273	289.752933243285	253.578638495388	226.5404989006	255.097085606454	224.259649317481	214.175831872155	188.180961008161	186.948683162937	293.489133971092	215.867118311298	0.442450728014562	0.00031930053928871	0.0334083625030364	Igfbp3	11	7156086	7163923	-	3130	protein_coding	insulin-like growth factor binding protein 3 [Source:MGI Symbol;Acc:MGI:96438]	-	286	230	360	357	340	245	214	277	206	207	165	217	8.61955193963809	6.96329413005096	10.948025746317	8.29865591920901	8.31698943936968	7.2429414557077	6.52102075387652	7.39706745770316	6.48887540346207	6.13001297219165	5.37184474168096
ENSMUSG00000021271	204.845588648688	213.065307726354	224.473447108629	228.804320924129	216.462485422925	262.893772154403	140.793861466261	145.506640887436	152.409470409938	194.517180637513	187.040470335384	189.533227169798	225.090820330855	168.300141817722	0.419082681475423	0.000324400711299828	0.0337554981900887	Zfp839	12	110816687	110836430	+	3749	protein_coding	zinc finger protein 839 [Source:MGI Symbol;Acc:MGI:1920055]	-	195	203	211	279	254	254	133	158	140	188	164	220	4.90661708050642	5.13111607419147	5.35728390062546	5.41467809123901	5.18740130237685	6.26919103991457	3.38362595088442	3.52261998196633	3.68179113368365	4.64812495358692	4.4577145304197
ENSMUSG00000001173	494.780883351447	678.030486656281	625.546857345375	694.613834490098	709.894686446049	772.121078847183	427.674586709545	391.394445425064	509.483086798937	584.586207766994	407.155170181293	592.722092240095	662.497971189405	485.502598186988	0.448178249693628	0.000328403896600274	0.0339853169060983	Ocrl	X	47001264	47054745	+	9486	protein_coding	OCRL, inositol polyphosphate-5-phosphatase [Source:MGI Symbol;Acc:MGI:109589]	-	471	646	588	847	833	746	404	425	468	565	357	688	4.68382631451453	6.45328193726243	5.90026955061017	6.49657070746576	6.72346969384423	7.27694236414926	4.06204183030769	3.74481146283964	4.86417604994144	5.52078345849736	3.83503155067546
ENSMUSG00000026991	443.306863639725	411.436456299167	513.842061390843	503.533523467438	447.412617508014	436.776267122669	285.822124781131	373.896811394297	389.7327886197	376.618371021568	261.172364065872	401.46583573239	459.38463157131	348.11804926916	0.398349939911957	0.000377583037527423	0.0378342199190176	Pkp4	2	58991194	59185552	+	5707	protein_coding	plakophilin 4 [Source:MGI Symbol;Acc:MGI:109281]	-	422	392	483	614	525	422	270	406	358	364	229	466	6.97537521396884	6.50892753049826	8.05595265221298	7.82788394352518	7.04341051559191	6.84223216829033	4.51234231047709	5.94623828479688	6.18474369288898	5.91192473983335	4.08894675384792
ENSMUSG00000021180	203.79509845049	241.404043236756	234.048143904732	288.670684463417	214.758056403847	271.173890962415	125.973454996128	105.906732291488	177.448169120143	236.938480670162	144.842315442645	178.333536473401	242.308319570276	161.573781498994	0.58566932552216	0.000382556872193747	0.0380270098482092	Rps6ka5	12	100514698	100693242	-	11932	protein_coding	ribosomal protein S6 kinase, polypeptide 5 [Source:MGI Symbol;Acc:MGI:1920336]	-	194	230	220	352	252	262	119	115	163	229	127	207	1.53373906940819	1.82661000897247	1.75504025796968	2.14641304120824	1.61703293915453	2.03180149081792	0.951217569418444	0.805580125948441	1.34685521437511	1.77892493780287	1.08461179170126
ENSMUSG00000032411	1037.88431582002	1082.11986337868	1172.36842992279	1388.40758180842	1356.72549918621	1530.78696463134	727.258517498656	802.128381094661	888.32948467507	1216.76704483891	850.806041891442	1081.2009095368	1261.38210912458	927.748396589257	0.443223751713388	0.000386126016704539	0.0380857005434925	Tfdp2	9	96078328	96205699	+	14029	protein_coding	transcription factor Dp 2 [Source:MGI Symbol;Acc:MGI:107167]	E2F	988	1031	1102	1693	1592	1479	687	871	816	1176	746	1255	6.64344317744772	6.9640710257009	7.47708858747782	8.78039638877717	8.68856228417638	9.75516651154503	4.67063757026274	5.1893813601722	5.73469065482056	7.7699100686469	5.41871060808248
ENSMUSG00000044951	53442.6383431454	65657.701429211	59843.9826860408	63897.9120757148	66754.8147467052	66172.6394839353	47659.2514065604	51353.7140240891	54607.2246088066	53781.9311145635	57586.7955405155	54638.9833343769	62628.2814607921	53271.3166714853	0.233472192062544	0.00039853760140743	0.038705154335661	Mylk4	13	32884810	32967937	-	7696	protein_coding	myosin light chain kinase family, member 4 [Source:MGI Symbol;Acc:MGI:3643758]	-	50874	62556	56252	77916	78331	63934	45021	55763	50161	51980	50493	63422	623.582361026014	770.256112936327	695.745740067753	736.623329919799	779.291936336899	768.705601405154	557.951211381601	605.626986767663	642.610295364557	626.046514245341	668.57473538045
ENSMUSG00000039109	146.018137549578	118.602856025015	164.897555932879	99.2305477842997	114.196744278236	150.07715339523	74.1020323506637	88.4090982607204	81.6479305767527	118.986573262309	31.9337388377485	63.7520855025684	132.170499160873	76.4719097984604	0.785167732636574	0.000419726690059151	0.0405550206956133	F13a1	13	37051152	37234220	-	6741	protein_coding	coagulation factor XIII, A1 subunit [Source:MGI Symbol;Acc:MGI:1921395]	-	139	113	155	121	134	145	70	96	75	115	28	74	1.94515166161893	1.58849319276441	2.18869385140092	1.30600524998453	1.52199085083398	1.99038414313442	0.990421044032643	1.19034007085829	1.09694155383209	1.58128044000724	0.423270059887634
ENSMUSG00000026048	328.803432036099	418.783535875938	379.796306245406	382.160622045319	373.269955178115	431.601192867661	276.29472062176	333.375974691467	322.237166009584	322.815746589915	203.007339754258	287.745899430511	385.73584070809	290.912807849583	0.405053926209696	0.000430058103592447	0.0410098216443223	Ercc5	1	44186904	44220420	+	5864	protein_coding	excision repair cross-complementing rodent repair deficiency, complementation group 5 [Source:MGI Symbol;Acc:MGI:103582]	-	313	399	357	466	438	417	261	362	296	312	178	334	5.03516111090549	6.44777947994894	5.79497946471507	5.78197000863641	5.71888968682764	6.5801428414151	4.24514659737886	5.15986996076232	4.97673254264919	4.93169282160821	3.09321342281629
ENSMUSG00000022270	4043.33677286564	3353.41703539755	3460.72096419133	3851.12935863695	3170.23797548536	3924.77631499801	2805.2912247037	2591.49169276737	3364.98337883657	3166.07751463186	2428.10464234166	3182.4351871147	3633.93640359581	2923.06394006598	0.313901447628524	0.000436198339287408	0.0410098216443223	Retreg1	15	25843266	25973773	+	4142	protein_coding	reticulophagy regulator 1 [Source:MGI Symbol;Acc:MGI:1913520]	-	3849	3195	3253	4696	3720	3792	2650	2814	3091	3060	2129	3694	87.6598679154337	73.095730327142	74.7569570967916	82.4901082004629	68.7645200075587	84.7132731108273	61.0213660868928	56.7855905039919	73.5758795990832	68.4773140995356	52.3780604220935
ENSMUSG00000034066	182.785294486522	165.834081875685	178.72767352725	210.762403145165	209.644769346612	205.967955349315	145.02826331487	158.399634383791	149.143553186868	153.130546459319	101.503669877129	146.457493722116	192.287029621758	142.277193490682	0.433830553179747	0.00043860581823215	0.0410098216443223	Farp2	1	93439801	93549698	+	5235	protein_coding	FERM, RhoGEF and pleckstrin domain protein 2 [Source:MGI Symbol;Acc:MGI:2385126]	-	174	158	168	257	246	199	137	172	137	148	89	170	3.1354187972066	2.86003694121955	3.05471180008667	3.57190843143725	3.59790748273828	3.51746365282081	2.49603130392112	2.74622368639922	2.58018254815754	2.62047737888152	1.73243586546273
ENSMUSG00000034255	169.128921909943	171.081995859093	186.174659924219	168.11787021307	137.206536035791	170.777450415262	99.5084434423198	116.957869574078	134.991245220231	152.095880604864	83.2558191127015	119.750538984554	167.081239059563	117.759966156458	0.501003531438101	0.000439228015813826	0.0410098216443223	Arhgap27	11	103222323	103254518	-	6415	protein_coding	Rho GTPase activating protein 27 [Source:MGI Symbol;Acc:MGI:1916903]	-	161	163	175	205	161	165	94	127	124	147	73	139	2.36751211863684	2.40780984256376	2.59668359857329	2.32509702206203	1.92159024720625	2.38001947909093	1.39758213169015	1.65474549727572	1.905774785728	2.12400756728463	1.15960490802965
ENSMUSG00000054203	95.5946080360545	90.2641205146132	113.832506353665	104.151070814926	100.561312125611	141.797034587217	31.7580138645702	44.2045491303602	86.0024868741795	76.5652732296594	18.2478507644277	75.8132908679191	107.700108738681	55.4319107885194	0.954274204905535	0.000439592026285638	0.0410098216443223	Ifi205	1	173839564	173859376	-	4177	protein_coding	interferon activated gene 205 [Source:MGI Symbol;Acc:MGI:101847]	-	91	86	107	127	118	137	30	48	79	74	16	88	2.05513290309999	1.95103570684922	2.43835508119799	2.21219356798151	2.16296306069428	3.03493448146264	0.6850194867633	0.960507830698558	1.86470084793293	1.6421114530099	0.390336670023262
ENSMUSG00000028211	360.318137982051	358.95731646509	340.433663861428	476.470646798993	242.881135218636	437.811281973671	182.079279490202	241.283164003216	209.018702276487	277.290448993902	150.544768806529	354.08252893994	369.478697049978	235.716482085046	0.6455998277753	0.00044194048412454	0.0410268082762281	Trp53inp1	4	11156431	11174379	+	6475	protein_coding	transformation related protein 53 inducible nuclear protein 1 [Source:MGI Symbol;Acc:MGI:1926609]	-	343	342	320	581	285	423	172	262	192	268	132	411	4.99709197120504	5.00515550408215	4.70422247426475	6.52860268378018	3.37005243215522	6.0449654450823	2.53358115906395	3.38209394051771	2.92353305279047	3.83645763646373	2.07738984296048
ENSMUSG00000034158	657.606864072199	674.881738266236	934.064865219794	1062.83297461531	825.795859743363	1039.15491040559	602.343662964681	629.914825107633	713.05859370364	676.671468813477	521.204237458967	703.857484535113	865.722868720415	641.175045430585	0.433257564675585	0.000446027442135222	0.0412042326788139	Lrrc58	16	37688751	37709220	+	8604	protein_coding	leucine rich repeat containing 58 [Source:MGI Symbol;Acc:MGI:2443542]	-	626	643	878	1296	969	1004	569	684	655	654	457	817	6.86336233248484	7.081769921573	9.71341090529071	10.9594429283601	8.62293169385137	10.7975827016341	6.30751092299575	6.64476838979513	7.50563516879017	7.04551481185908	5.41252161570226
ENSMUSG00000039178	331.954902630695	390.444800365536	347.880650258397	351.81739668979	382.644314783044	373.640361211572	247.712508143647	315.878340660699	329.857639530081	263.839792885989	291.965612230843	295.499531451094	363.063737656506	290.792237483726	0.319900116423151	0.00045512928612741	0.0418409632071888	Tbc1d19	5	53966948	54061307	+	3117	protein_coding	TBC1 domain family, member 19 [Source:MGI Symbol;Acc:MGI:1914499]	-	316	372	327	429	449	361	234	343	303	255	256	343	9.5634210235066	11.309343088067	9.98593183582232	10.0139258090729	11.0291262794231	10.7167630296633	7.16020079898632	9.19774713017299	9.58412299586263	7.5829599775499	8.36925900898129
ENSMUSG00000086801	79.8372550630785	51.4295570373959	89.3638367636249	127.113511624516	103.117955654228	145.937093991224	35.9924157131795	32.2324837408877	48.9887583460516	78.6346049385691	65.0079683482737	62.0290561646611	99.4665350223445	53.8142145419371	0.889675296946118	0.000472922363149489	0.0428526493460528	Gm15943	15	58077871	58187449	+	3821	lncRNA	predicted gene 15943 [Source:MGI Symbol;Acc:MGI:3802102]	-	76	49	84	155	121	141	34	35	45	76	57	72	1.87628821163236	1.21520706021178	2.09256952021117	2.95147113380079	2.42459889647958	3.41456435984541	0.848687930481989	0.765623322368576	1.16113316111732	1.84362224753991	1.52013326729208
ENSMUSG00000034235	175.431863099133	162.68533348564	256.389103095638	253.406936077261	209.644769346612	331.204752320507	102.684244828777	87.4881701538379	189.423198938066	162.442539149413	93.5202351676921	192.117771176659	231.460459570799	137.946026569074	0.745593113416379	0.000508992420552499	0.0452549223494048	Usp54	14	20598980	20691131	-	9068	protein_coding	ubiquitin specific peptidase 54 [Source:MGI Symbol;Acc:MGI:1926037]	-	167	155	241	309	246	320	97	95	174	157	82	223	1.7372725400194	1.61976282924868	2.52978246496205	2.47931008829071	2.07708928894297	3.26536471018825	1.02024945019997	0.875661471747373	1.89183950081237	1.60480964791234	0.921480578658109
ENSMUSG00000024456	1868.82206259496	2153.74389879054	2066.00679755904	1920.64415628785	1667.78379516797	1925.12762286295	1563.552882599	1661.35430481604	1654.73139302219	1815.83857456827	1456.40658913589	1579.156388192	1933.68805554388	1621.84002205556	0.253068888512394	0.000511388891196791	0.0452555272032001	Diaph1	18	37976654	38068529	-	6339	protein_coding	diaphanous related formin 1 [Source:MGI Symbol;Acc:MGI:1194490]	-	1779	2052	1942	2342	1957	1860	1477	1804	1520	1755	1277	1833	26.4739163149912	30.6752313193866	29.1612489605608	26.8812845779848	23.6375055825327	27.1509744129082	22.2231639438535	23.7870140555999	23.6411929996547	25.6620741001336	20.5283475081589
ENSMUSG00000047248	188.037745477514	217.263638913081	196.813211919888	237.825279813611	236.915633651863	226.668252369347	132.325057769042	178.660052735206	175.270890971429	178.99719282069	164.230656879849	169.718389783864	217.253960357551	166.53370682668	0.385131783326513	0.000514874261899558	0.0453520407993202	C2cd3	7	100021440	100119359	+	11994	protein_coding	C2 calcium-dependent domain containing 3 [Source:MGI Symbol;Acc:MGI:2142166]	-	179	207	185	290	278	219	125	194	161	173	144	197	1.40783572591104	1.63545102254073	1.46820037528136	1.75921059919923	1.77464840037007	1.68955875204403	0.994013116353421	1.35195374512362	1.3234525766389	1.33695701486494	1.22343892247661
ENSMUSG00000020190	5205.17893207308	5093.62531229556	4971.39534757642	5221.49502266641	4706.78073618431	5209.22974509098	4011.03715109521	4060.37202324496	4962.01690091785	4747.04694023888	3941.53576511639	4210.22218717637	5067.95084931446	4322.03849463161	0.229715176732312	0.000560832206522982	0.0487203684730837	Mknk2	10	80501161	80513946	-	3892	protein_coding	MAP kinase-interacting serine/threonine kinase 2 [Source:MGI Symbol;Acc:MGI:894279]	-	4955	4853	4673	6367	5523	5033	3789	4409	4558	4588	3456	4887	120.097460062094	118.159515475579	114.287990392149	119.027112430368	108.651013593865	119.659539405568	92.8534233919222	94.6872306960973	115.464383623	109.266231097581	90.4866995037071
ENSMUSG00000020108	1169.19559059482	974.012835320478	1894.72611042876	2027.25548861809	471.274623775108	3888.55079521296	196.899685960335	327.850406050172	536.699063657854	340.405066115648	110.627595259343	1064.83213082668	1737.5025739917	429.552324645006	2.01573856553164	0.000617065912367982	0.0526347170777618	Ddit4	10	59785491	59787656	-	1755	protein_coding	DNA-damage-inducible transcript 4 [Source:MGI Symbol;Acc:MGI:1921997]	-	1113	928	1781	2472	553	3757	186	356	493	329	97	1236	59.8247701802997	50.1074263889786	96.5971794295927	102.48380116522	24.125680996666	198.087605520469	10.1083895478655	16.9549699708301	27.6959553739061	17.3761742388863	5.6322050661202
ENSMUSG00000044641	17.8583333693728	44.0824774606251	50.0011943796473	34.443661214385	24.7142207766332	33.1204752320507	6.35160277291403	12.8929934963551	11.9750298179237	25.8666463613714	7.98343470943713	21.5378667238407	34.036727072119	14.4345956469737	1.22346670154842	0.0006185426561493	0.0526347170777618	Pard6b	2	167922924	167943123	+	3399	protein_coding	par-6 family cell polarity regulator beta [Source:MGI Symbol;Acc:MGI:2135605]	-	17	42	47	42	29	32	6	14	11	25	7	25	0.471803058806007	1.17092577911214	1.31620743645247	0.899046190994729	0.653248473955649	0.871148196292647	0.168362835905284	0.344271458048877	0.31907154323116	0.681748560707677	0.209860508510043
ENSMUSG00000051495	782.615197657809	634.997591992337	706.399852512464	812.706387225132	602.515658244126	1048.47004406461	334.517746040139	209.050680262329	463.760245675955	539.060910170981	485.849026602888	573.768769523115	764.617455282746	434.334563045901	0.815943827511001	0.000653619379017789	0.054115989247287	Irf2bp2	8	127315035	127320725	-	5080	protein_coding	interferon regulatory factor 2 binding protein 2 [Source:MGI Symbol;Acc:MGI:2443921]	-	745	605	664	991	707	1013	316	227	426	521	426	666	13.8342479698565	11.2855545441381	12.4417655670853	14.1936411753017	10.655829724569	18.4518094521917	5.93293399739145	3.73496290355942	8.26784714993908	9.50625361761772	8.54534758012713
ENSMUSG00000038594	1486.44363045074	2319.57798066622	2181.96701431184	2791.57673270873	1458.13902582136	2667.23327103108	629.867274980641	781.867962743246	1808.22950250648	1291.26298635966	724.211577213225	1263.84201935497	2150.82294249833	1083.2135538597	0.989566989455181	0.000689946250815763	0.0560781205920555	Cep85l	10	53149539	53256043	-	7986	protein_coding	centrosomal protein 85-like [Source:MGI Symbol;Acc:MGI:3642684]	-	1415	2210	2051	3404	1711	2577	595	849	1661	1248	635	1467	16.7143745273898	26.2237145906431	24.4463486524436	31.0130247065175	16.4040949430929	29.859211891807	7.10614077028605	8.88592272491148	20.5062798011332	14.4850722293566	8.10267211280953
ENSMUSG00000037896	255.269118162211	300.180679850923	260.644523893906	259.96763345143	290.605147752824	279.454009770428	213.837293354772	197.999542979738	237.323318209761	230.730485543433	220.114699845909	229.162901941665	274.35351881362	221.528040312547	0.309315571697936	0.000701768875063908	0.056795294683591	Rcor1	12	111005785	111082335	+	5684	protein_coding	REST corepressor 1 [Source:MGI Symbol;Acc:MGI:106340]	MYB	243	286	245	317	341	270	202	215	218	223	193	266	4.03287907275565	4.76807640006962	4.102888001194	4.05778537503591	4.59337476628019	4.39544573684713	3.3895609432001	3.16161176070986	3.78136827852523	3.63652166642873	3.4600875290577
ENSMUSG00000022637	450.660295027114	411.436456299167	471.287853408165	461.709077707113	427.811683788615	449.196445334688	235.009302597819	256.018013713336	341.832669348005	445.940983270043	237.22205993756	391.127659704946	445.350301927477	317.858448095285	0.48538063437243	0.000706077677357737	0.0569008470374503	Cblb	16	51851588	52028411	+	10475	protein_coding	Casitas B-lineage lymphoma b [Source:MGI Symbol;Acc:MGI:2146430]	-	429	392	443	563	502	434	222	278	314	431	208	454	3.86336958058242	3.54620042162803	4.02556961537675	3.91055359881027	3.66928339927109	3.83379534645656	2.02136661880251	2.21827258562878	2.95544014830993	3.8138062328644	2.02345312829911
ENSMUSG00000041638	1476.98921866695	1490.4075712878	1563.86714336344	1613.93155404547	1565.51805402328	1846.46649418683	1339.12958462271	1307.71791177316	1287.86002496398	1404.04156449524	1397.1010741515	1452.51373185581	1592.86333926229	1364.7273153104	0.222855840885428	0.000719641911584938	0.0577482140745575	Gcn1	5	115703313	115760713	+	17815	protein_coding	GCN1 activator of EIF2AK4 [Source:MGI Symbol;Acc:MGI:2444248]	-	1406	1420	1470	1968	1837	1784	1265	1420	1183	1357	1225	1686	7.44496206836788	7.55324826182735	7.8543301932484	8.03753999476104	7.89505027956979	9.26621241062744	6.77252856432975	6.66233805376507	6.54704717448896	7.06040163142565	7.0070321063422
ENSMUSG00000021750	137.614215963991	111.255776448244	156.386714336344	173.858480415467	98.0046685969936	161.462316756247	29.6408129402655	34.9952680615352	128.459410774091	57.941287849472	23.9503041283114	68.0596588473365	139.763695419548	57.1744571001686	1.28963577885447	0.000737902902322989	0.0581063926774491	Fam107a	14	14151750	14173499	+	3870	protein_coding	family with sequence similarity 107, member A [Source:MGI Symbol;Acc:MGI:3041256]	-	131	106	147	212	115	156	28	38	118	56	21	79	3.19317945267506	2.59553053192709	3.61563029438553	3.98573825936083	2.27519406346034	3.72998307651	0.69007010416786	0.820723330832576	3.00619809025699	1.34125837766762	0.552958037539252
ENSMUSG00000044452	413.89313809017	377.849806805358	411.711962232415	457.608641848258	455.934762603405	407.795851294625	376.861764526232	338.901543332762	358.162255463355	342.474397824558	343.287692505796	346.328896919358	420.799027145705	351.002758428677	0.2646388209997	0.000743690209572507	0.058198368549108	Zfp507	7	35471768	35502428	-	8231	protein_coding	zinc finger protein 507 [Source:MGI Symbol;Acc:MGI:1916378]	zf-C2H2	394	360	387	558	535	394	356	368	329	331	301	402	4.51550799467835	4.14458585820383	4.47544279308956	4.93248163383673	4.9766001792708	4.4293178660107	4.12518607318215	3.7369678776593	3.94084949051427	3.72744099840518	3.72647094427194
ENSMUSG00000074764	17.8583333693728	9.44624517013394	24.4686695900402	15.5816562636504	15.3398611717033	24.840356424038	4.23440184860935	10.1302091757075	1.0886390743567	5.17332927227429	11.4049067277673	6.03060268267538	17.9225203314898	6.3436814635651	1.4912294056615	0.000750355599894869	0.0584783306617656	Sel1l2	2	140071775	140231626	-	2739	protein_coding	sel-1 suppressor of lin-12-like 2 (C. elegans) [Source:MGI Symbol;Acc:MGI:2684964]	-	17	9	23	19	18	24	4	11	1	5	10	7	0.585490542855647	0.311373550555638	0.799306694938707	0.504714112385739	0.503166876075519	0.810797568236228	0.139288129303167	0.335679485343698	0.035996022949408	0.169205064464797	0.372041865344826
ENSMUSG00000029313	1307.86029675701	1169.23523550325	1272.37081868209	1456.47481706542	1407.85836975855	1883.72702882288	931.568406694058	1040.64876077723	1302.01233293062	1146.40976673598	1058.37534433681	1132.03027500507	1416.25442776487	1101.84081441329	0.362329214679212	0.000763936269516032	0.0592927257053058	Aff1	5	103840240	104003188	+	9458	protein_coding	AF4/FMR2 family, member 1 [Source:MGI Symbol;Acc:MGI:1100819]	AF-4	1245	1114	1196	1776	1652	1820	880	1130	1196	1108	928	1314	12.4174676471684	11.1613601729129	12.0367576598361	13.6624168344948	13.3734144494904	17.8059564288884	8.87420606423158	9.98626948521424	12.4674725949123	10.8586500338029	9.99844615139096
ENSMUSG00000003526	276.278922126179	251.899871203572	306.390297475286	345.256699315621	258.22099639034	338.449856277518	118.563251761062	122.483438215373	189.423198938066	305.226427064183	169.933110243733	236.055019293294	296.082773798086	190.280740919285	0.637584839160908	0.000772526224107238	0.0594719578542393	Prodh	16	17878221	17908067	-	7797	protein_coding	proline dehydrogenase [Source:MGI Symbol;Acc:MGI:97770]	-	263	240	288	421	303	327	112	133	174	295	149	274	3.18193431093306	2.91685573074052	3.51594927135794	3.92860568882857	2.97540894854122	3.88073016535998	1.37005068776689	1.42576600181188	2.20023093412422	3.50695236919016	1.94734356429066
ENSMUSG00000027630	662.859315063191	744.154202847218	610.652884551437	820.907258942843	661.318459402322	696.564994724067	587.523256494548	545.189439274443	622.701550532034	589.759537039269	541.733069568948	591.860577571141	699.40951925518	579.79457174673	0.271784421845674	0.000787352137415131	0.060247791247914	Tbl1xr1	3	22130816	22270758	+	8903	protein_coding	transducin (beta)-like 1X-linked receptor 1 [Source:MGI Symbol;Acc:MGI:2441730]	-	631	709	574	1001	776	673	555	592	572	570	475	687	6.68584003166349	7.54642227807196	6.13695820895207	8.18053267543384	6.67354999619964	6.9947455212454	5.94569676849271	5.55788403634099	6.3344105495924	5.93435971682298	5.43677151364992
ENSMUSG00000095545	12.6058823783808	22.0412387303125	11.7024071952366	22.96244080959	10.2265741144689	21.7353118710333	4.23440184860935	6.44649674817753	8.70911259485362	10.3466585445486	3.4214720183302	4.30757334476813	16.878975849837	6.24428584988123	1.43826267152779	0.000791088148628758	0.060247791247914	Zfp969	2	175484016	175495439	-	1758	protein_coding	zinc finger protein 969 [Source:MGI Symbol;Acc:MGI:3782422]	zf-C2H2	12	21	11	28	12	21	4	7	8	10	3	5	0.643910297884609	1.13196152537035	0.595595573324635	1.15883883321619	0.522629531122809	1.10533431284081	0.217013757770975	0.332815325912438	0.448660327000812	0.527249910772558	0.173894653443597
ENSMUSG00000023067	277.329412324378	221.461970099807	328.731256666192	363.298617094585	192.600479155831	371.570331509569	173.610475792983	187.869333804031	246.032430804615	174.858529402871	200.726358408705	227.439872603757	292.498677808394	201.756166802827	0.535386219618499	0.000792148063192026	0.060247791247914	Cdkn1a	17	29309950	29319701	+	3553	protein_coding	cyclin-dependent kinase inhibitor 1A (P21) [Source:MGI Symbol;Acc:MGI:104556]	-	264	211	309	443	226	359	164	204	226	169	176	264	7.0092526543724	5.62753869027956	8.27829538501535	9.07177767556358	4.87017763747398	9.34958790276118	4.40245359769669	4.79909235505727	6.27133187447364	4.40886583141989	5.04779031172498
ENSMUSG00000001151	2276.41225949593	2417.18918075761	2488.35731178713	2614.43790360618	2179.96471540095	2809.0303056183	1814.44119212911	1786.60052735206	2165.30311889548	2344.55282619471	1862.4212686444	2178.77059778372	2464.23194611102	2025.34825516658	0.282823421270054	0.000832153435293665	0.0623509277582535	Pcnt	10	76187097	76278620	-	12154	protein_coding	pericentrin (kendrin) [Source:MGI Symbol;Acc:MGI:102722]	-	2167	2303	2339	3188	2558	2714	1714	1940	1989	2266	1633	2529	16.8190969782036	17.95584912969	18.3184463392457	19.0845955362005	16.1143532087937	20.6625462808162	13.4504784243993	13.3415609832258	16.1347449022062	17.281286058508	13.6914926671885
ENSMUSG00000056492	2227.03922018061	1859.86071571971	2370.26938463519	2570.15319633054	2230.24537146376	2173.53118710333	1841.96480414507	2026.96276324839	1824.55908862183	1961.72646004641	1821.36360442444	1878.96349298786	2238.51651257219	1892.590035579	0.2424172073182	0.000835247354553908	0.0623509277582535	Adgrf5	17	43671342	43770448	+	9010	protein_coding	adhesion G protein-coupled receptor F5 [Source:MGI Symbol;Acc:MGI:2182928]	-	2120	1772	2228	3134	2617	2100	1740	2201	1676	1896	1597	2181	22.1959667388459	18.6367495204118	23.5379178275824	25.3080148565109	22.2387566317358	21.566900354874	18.4191932275469	20.4182914831441	18.3398498440318	19.5051335248607	18.0619223382867
ENSMUSG00000026034	1036.83382562182	1111.50818168576	990.449190796843	1123.51942532637	1006.46533576565	1015.34956883256	985.557030263827	970.65822465416	823.011140213667	836.010010399525	815.450831035364	907.174946408169	1047.3542546715	889.643697162452	0.234862912626912	0.000849654875103481	0.06271177135547	Clk1	1	58449348	58463225	-	8132	protein_coding	CDC-like kinase 1 [Source:MGI Symbol;Acc:MGI:107403]	-	987	1059	931	1370	1181	981	931	1054	756	808	715	1053	11.4494013130563	12.3404169005197	10.8975772891527	12.2576460554769	11.1194702744109	11.1625872230614	10.9193920104599	10.8334651021289	9.165812688757	9.20978255356163	8.95968037952936
ENSMUSG00000020009	463.266177405495	422.981867062664	474.479419006866	486.311692860246	436.333828884006	477.141846311731	333.459145577987	329.692262263937	400.619179363267	420.074336908672	265.734326756979	410.080982421926	460.085805255168	359.943372215461	0.352712587768284	0.000883699300066133	0.0644264191109342	Ifngr1	10	19467697	19485977	+	2847	protein_coding	interferon gamma receptor 1 [Source:MGI Symbol;Acc:MGI:107655]	-	441	403	446	593	512	461	315	358	368	406	233	476	14.6121498631127	13.4137071558238	14.9116272307533	15.1548312834923	13.769369817513	14.9832727822116	10.5528370776987	10.5104111986329	12.7440334822275	13.2182497124725	8.33973592970912
ENSMUSG00000032202	68.281862882896	57.7270538174852	60.6397463753169	50.0253174780354	53.6895141009617	57.9608316560888	12.7032055458281	30.3906275271226	31.5705331563444	42.4213000326491	14.8263787460975	50.829365468264	58.0540543851307	30.456901746051	0.916465758854457	0.000884510981563148	0.0644264191109342	Rab27a	9	72952136	73004911	+	3879	protein_coding	RAB27A, member RAS oncogene family [Source:MGI Symbol;Acc:MGI:1861441]	-	65	55	57	61	63	56	12	33	29	41	13	59	1.58072591173142	1.34361285908322	1.39872624201571	1.14417890100944	1.24351875676668	1.3358616289244	0.295058148616685	0.711079745055212	0.737097215492247	0.979714335361291	0.341513139967343
ENSMUSG00000021275	731.141177946087	967.715338540388	810.657662070026	982.464431781744	1238.26768236028	1248.22791030791	570.58564910011	658.463596420991	846.961199849515	884.639305558903	695.699310393807	736.595041955351	996.412367167739	732.157350546446	0.445174277187152	0.000914454560625057	0.0655982593527172	Tecpr2	12	110855698	110938828	+	9553	protein_coding	tectonin beta-propeller repeat containing 2 [Source:MGI Symbol;Acc:MGI:2144865]	-	696	922	762	1198	1453	1206	539	715	778	855	610	855	6.87278023798872	9.14581442576602	7.59264055692536	9.12432865223819	11.6454803546207	11.6815576891868	5.38139826078144	6.25590884257985	8.0294606025183	8.2958658890728	6.50689655814385
ENSMUSG00000034593	161.775490522554	171.081995859093	153.195148737643	185.339700820262	188.339406608135	182.162613776279	117.50465129891	97.6183793295455	113.218463733097	169.685200130597	134.577899387654	134.396288356766	173.649059387328	127.833480372761	0.444938959100241	0.000934321054728569	0.0667065541884998	Myo5a	9	74978297	75130970	+	14803	protein_coding	myosin VA [Source:MGI Symbol;Acc:MGI:105976]	-	154	163	144	226	221	176	111	106	104	164	118	156	0.981372710300254	1.04344390596815	0.92595610581564	1.11081715855728	1.14307336448001	1.10016077522076	0.715186628789984	0.598522214156695	0.692676019271537	1.02690317013212	0.812299364744839
ENSMUSG00000022181	16.8078431711744	14.6941591535417	28.724090388308	10.6611332330239	19.6009337193987	11.3851633610174	3.17580138645702	5.52556864129503	5.44319537178351	1.03466585445486	2.28098134555346	13.784234703258	16.9788871710774	5.20740788380032	1.66358280450869	0.000969645424364861	0.0685191979351557	C6	15	4756657	4844449	+	3556	protein_coding	complement component 6 [Source:MGI Symbol;Acc:MGI:88233]	-	16	14	27	13	23	11	3	6	5	1	2	16	0.424444808279394	0.373076183277294	0.722735951616401	0.265990104193343	0.495219405263865	0.286235938477097	0.0804647468000648	0.141030694910991	0.138629227866182	0.0260659545314443	0.0573128610337165
ENSMUSG00000000631	5965.73383556872	5858.77117107641	6016.10115355118	6195.75858273045	6064.35844988005	6914.93421954159	4935.1953545542	5532.93606615009	5488.9182129065	5843.79274596103	5478.91719201942	5111.36653090187	6169.2762353914	5398.52101708218	0.192596735482443	0.000986445309285031	0.0694472166068398	Myo18a	11	77654072	77756806	+	16037	protein_coding	myosin XVIIIA [Source:MGI Symbol;Acc:MGI:2667185]	-	5679	5582	5655	7555	7116	6681	4662	6008	5042	5648	4804	5933	33.4050199050384	32.9835916183624	33.5650367403285	34.276401319135	33.9738199425292	38.5488627801462	27.726515057123	31.3134516828764	30.9974711467354	32.6442687413127	30.5255652724214
ENSMUSG00000045534	209.047549441482	142.743260348691	171.280687130281	219.783362034647	161.068542302885	188.372702882289	100.567043904472	99.4602355433105	133.902606145874	142.78388791477	69.5699310393807	171.441419121772	182.049350690046	119.62085394493	0.602670078650936	0.000995796594980335	0.0698459107990281	Kcna5	6	126509514	126512375	-	2862	protein_coding	potassium voltage-gated channel, shaker-related subfamily, member 5 [Source:MGI Symbol;Acc:MGI:96662]	-	199	136	161	268	189	182	95	108	123	138	61	199	6.55913307804995	4.50298521143635	5.35468457793844	6.81316715629439	5.05619419024944	5.88430244250267	3.16592135616095	3.15412044719173	4.2372299593245	4.46935490402047	2.17192113277248
ENSMUSG00000020681	682.818628828961	559.427630631266	696.825155716361	718.396362471459	664.727317440478	692.424935320061	602.343662964681	579.263779229095	505.12853050151	595.967532165998	361.535543270224	434.203393152628	669.103338401431	513.073740214023	0.382991659466988	0.00102190486875766	0.0711501264872518	Ace	11	105858771	105880790	+	5287	protein_coding	angiotensin I converting enzyme (peptidyl-dipeptidase A) 1 [Source:MGI Symbol;Acc:MGI:87874]	-	650	533	655	876	780	669	569	629	464	576	317	504	11.5975710452169	9.55320594750266	11.7926018661139	12.0553181243994	11.2957965805567	11.7087365775956	10.2647671612361	9.94409999508517	8.65277124689064	10.0983067457458	6.10989570890666
ENSMUSG00000069601	2050.55686688328	2210.42136981134	2216.01038069799	2630.8396470416	2451.82114394392	2634.11279579903	1467.22024054314	1684.3775074881	1753.79754878865	2421.11809942437	1921.72678362879	1952.19223984892	2365.62703402953	1866.73873662033	0.341917705748059	0.00103981711064717	0.07206877694392	Ank3	10	69234603	69863268	+	34838	protein_coding	ankyrin 3, epithelial [Source:MGI Symbol;Acc:MGI:88026]	-	1952	2106	2083	3208	2877	2545	1386	1829	1611	2340	1685	2266	5.28554279997319	5.72844033134574	5.69132913458008	6.69984914819135	6.32292772525423	6.75970588003824	3.79451402218601	4.38818206827924	4.55920245562111	6.22584104409923	4.92867902166434
ENSMUSG00000026490	565.16372663074	543.683888681043	557.460124573089	670.831306508737	648.535241759236	623.078940302954	552.589441243521	461.384981548135	498.59669605537	527.679585771977	508.658840058423	452.295201200654	601.4588714093	500.20079097968	0.269257165038513	0.00105429610028113	0.0720883387488529	Cdc42bpa	1	179788037	179993168	+	21522	protein_coding	CDC42 binding protein kinase alpha [Source:MGI Symbol;Acc:MGI:2441841]	-	538	518	524	818	761	602	522	501	458	510	446	525	2.35810231151246	2.28075362820184	2.31753502708462	2.76537833557944	2.70728265131136	2.58825518213575	2.31331099777248	1.94571508768428	2.09811555344114	2.19645815909516	2.1117187550137
ENSMUSG00000057137	167.027941513546	121.75160441506	98.9385335597276	124.653250109203	191.748264646292	126.271811822193	103.742845290929	92.0928106882504	113.218463733097	78.6346049385691	101.503669877129	70.6442028541974	138.39856767767	93.3060995636954	0.574859268318219	0.0010619274021183	0.0723409393572531	Tmem140	6	34840081	34851881	+	5853	protein_coding	transmembrane protein 140 [Source:MGI Symbol;Acc:MGI:1915737]	-	159	116	93	152	225	122	98	100	104	76	89	82	2.56260456582524	1.87806537913586	1.51245363939453	1.88950890664553	2.94330700830951	1.92874376250556	1.59695874952224	1.42805726722332	1.75186795032916	1.20356750518537	1.54951337018578
ENSMUSG00000045912	34.6661765405472	22.0412387303125	30.8518007874419	25.4227023249032	36.6452239101802	21.7353118710333	11.6446050836757	9.20928106882504	15.2409470409938	20.6933170890971	10.2644160549906	18.9533227169798	28.5604090274031	14.334314842427	0.991332516725154	0.00111102444612033	0.0740865526782632	C2cd4c	10	79442688	79449859	-	6754	protein_coding	C2 calcium-dependent domain containing 4C [Source:MGI Symbol;Acc:MGI:2685084]	-	33	21	29	31	43	21	11	10	14	20	9	22	0.460909732769195	0.294638490020889	0.40870936440677	0.333952360149624	0.487459983907038	0.287707687588711	0.155338023681341	0.123755096018035	0.204368299676932	0.274475967763742	0.135789221537094
ENSMUSG00000067279	10676.1318842903	16745.0439382574	19548.339292043	17682.7195977278	13494.8167585512	27786.0086899886	2982.07750188314	4994.19312362382	13960.7074895504	7421.65817400469	2806.74754570354	9388.78686225662	17655.5100268097	6925.69511617036	1.3500768792446	0.00111962017457087	0.0743977784772744	Ppp1r3c	19	36709131	36714053	-	2725	protein_coding	protein phosphatase 1, regulatory subunit 3C [Source:MGI Symbol;Acc:MGI:1858229]	-	10163	15954	18375	21562	15835	26846	2817	5423	12824	7173	2461	10898	351.81829077405	554.797279527893	641.857304553762	575.71350165842	444.921232517724	911.604178665235	98.5976325152835	166.340210057138	463.984588019261	243.988698213945	92.0299005082825
ENSMUSG00000056367	45.1710785225312	73.4707957677084	78.7252847679553	102.510896471384	48.5762270437273	107.641544504165	24.3478106295038	26.7069150995926	55.5205927921918	48.6292951593783	55.8840429660599	40.4911894408204	76.0159711795785	41.9299743479245	0.863605896050599	0.00116098536281435	0.0766088529650806	Actr3b	5	25964995	26055686	+	2425	protein_coding	ARP3 actin-related protein 3B [Source:MGI Symbol;Acc:MGI:2661120]	-	43	70	74	125	57	104	23	29	51	47	49	47	1.67270635939138	2.73537919120424	2.90467551358757	3.75043937554134	1.79967748438805	3.96839436593641	0.904611781619753	0.999563531409007	2.07350451537313	1.79647633515437	2.05905611504307
ENSMUSG00000035168	262.6225495496	210.966142132991	254.261392696504	253.406936077261	276.11750109066	272.208905813417	214.895893816925	184.185621376501	217.727814871341	207.967836745426	184.759488989831	213.655637900499	254.930571226739	203.86538228342	0.323434026344729	0.0011733262123375	0.0771543465598874	Tanc1	2	59442386	59676493	+	14570	protein_coding	tetratricopeptide repeat, ankyrin repeat and coiled-coil containing 1 [Source:MGI Symbol;Acc:MGI:1914110]	-	250	201	239	309	324	263	203	200	200	201	162	248	1.61861459574631	1.30727738236369	1.56140654694719	1.54305997807962	1.7026172494355	1.67028055325425	1.32887041507822	1.14734649074236	1.35337140505736	1.27870949876987	1.13302451892296
ENSMUSG00000099137	48.3225491171264	32.537066697128	38.2987871844107	79.548455661794	66.4727317440478	44.5056385930682	10.5860046215234	18.4185621376501	32.6591722307011	33.1093073425554	17.107360091651	41.3527041097741	51.6142048329292	25.5388517556425	1.0147258980527	0.0012408762848254	0.0807550346461288	Gm10603	7	100095944	100124053	-	7007	lncRNA	predicted gene 10603 [Source:MGI Symbol;Acc:MGI:3642592]	-	46	31	36	97	78	43	10	20	30	32	15	48	0.619282360131922	0.419238171417926	0.489044107121054	1.00721804151473	0.852303075801389	0.567844686231377	0.136117520394382	0.238573403312633	0.422119766769353	0.423304852011147	0.218143856681778
ENSMUSG00000020134	345.611275207274	270.79236154384	295.751745479616	334.595566082597	301.683936376832	311.539470151477	250.888309530104	275.357503957869	252.564265250755	253.49313434144	185.899979662607	254.14682734132	309.995725806939	245.391670014016	0.335247549225964	0.00128237454819944	0.0831698944993186	Peli1	11	21041291	21100323	+	6553	protein_coding	pellino 1 [Source:MGI Symbol;Acc:MGI:1914495]	-	329	258	278	408	354	301	237	299	232	245	163	295	4.73607668130495	3.73087569701322	4.03814839806208	4.53005917065235	4.13613461217152	4.25029971233982	3.44948550741056	3.81377588330897	3.49055406548991	3.46546328504271	2.53472753053953
ENSMUSG00000024697	21.009803963968	13.6445763568601	17.0216831930714	13.1213947483371	12.7832176430861	15.5252227650238	6.35160277291403	9.20928106882504	4.35455629742681	8.27732683563886	4.56196269110693	5.16908801372176	15.5176497783911	6.32063627993891	1.28081265845179	0.0012880041941926	0.0832499093161071	Gna14	19	16413126	16588184	+	3434	protein_coding	guanine nucleotide binding protein, alpha 14 [Source:MGI Symbol;Acc:MGI:95769]	-	20	13	16	16	15	15	6	10	4	8	4	6	0.549405117298167	0.358735456372051	0.443503793256614	0.339003023345379	0.334443329831791	0.404188726594174	0.166646848934788	0.243401839984219	0.11484345586305	0.215936014708948	0.118698039508384
ENSMUSG00000031145	663.909805261389	791.385428697888	910.660050829321	981.644344609973	590.584655110579	1254.43799941392	370.510161753318	500.984890144082	674.956226101156	566.996888241262	377.502412689098	671.981441783829	865.437047320512	527.155336785458	0.714692182967189	0.00131543243870653	0.084161011906163	Prickle3	X	7523499	7534425	+	4902	protein_coding	prickle planar cell polarity protein 3 [Source:MGI Symbol;Acc:MGI:1859635]	-	632	754	856	1197	693	1212	350	544	620	548	331	780	12.1620495023542	14.5756952910106	16.6218019978196	17.7666162976226	10.8240925810848	22.8782362789986	6.80990234376177	9.2757650686895	12.4699563958029	10.3619773161916	6.88079362501852
ENSMUSG00000039943	534.699510882986	454.469350963111	484.054115802968	512.55448235692	507.919847685288	473.001786907724	383.213367299147	454.938484799957	413.682848255547	459.391639377957	390.047810089642	381.650998346457	494.449849099833	413.820858028118	0.257233269886253	0.00132408167115459	0.0844291538327462	Plcb4	2	135500931	135856513	+	8970	protein_coding	phospholipase C, beta 4 [Source:MGI Symbol;Acc:MGI:107464]	-	509	433	455	625	596	457	362	494	380	444	342	443	5.35289019485044	4.57432160414753	4.82832616952105	5.06957384932428	5.08727702123265	4.71429749398624	3.84912729627696	4.60318737727836	4.17674254249753	4.58802644764038	3.88523693265755
ENSMUSG00002076726	2.1009803963968	0	68.0867327722857	2.46026151531322	69.8815897822041	1.03501485100159	2.11720092430468	0	0	1.03466585445486	1.14049067277673	0	23.9274298862002	0.715392908589378	5.09209634508752	0.00138900851687986	0.086907425425895	ENSMUSG00002076726	13	50833573	50833681	-	109	miRNA	-	-	2	0	64	3	82	1	2	0	0	1	1	0	1.73087814018523	0	55.8896156346133	2.00252818033492	57.5995280493422	0.848919930962932	1.75004672551089	0	0	0.850371874438677	0.934883182733467
ENSMUSG00000024991	3197.69216331593	2946.17891028511	2934.11264040569	3213.10153899906	3237.56292173894	3243.73654303897	2523.70350177117	2761.86339254063	2730.30679848661	3086.40824383884	2741.73957735526	2656.04972438403	3128.73078629728	2750.01187306276	0.186418406552839	0.00139048209441579	0.086907425425895	Eif3a	19	60749555	60779096	-	8731	protein_coding	eukaryotic translation initiation factor 3, subunit A [Source:MGI Symbol;Acc:MGI:95301]	-	3044	2807	2758	3918	3799	3134	2384	2999	2508	2983	2404	3083	32.8884688695968	30.4655951209115	30.0682339353108	32.6500855094945	33.314774338536	33.2145392207678	26.0428439986461	28.7102269339013	28.3210986142411	31.6682927337204	28.0578455698943
ENSMUSG00000112280	120.806372792816	128.049101195149	129.79033434717	127.933598796287	129.536605449939	122.131752418187	95.2740415937105	117.878797680961	91.445682245963	85.8772659197531	88.9582724765851	93.0435842469917	126.374627499925	95.412940693994	0.402786942081948	0.00140456385342457	0.0874987837373504	A830082N09Rik	10	33863212	33871051	-	7840	lncRNA	RIKEN cDNA A830082N09 gene [Source:MGI Symbol;Acc:MGI:3041184]	-	115	122	122	156	152	118	90	128	84	83	78	108	1.38370902341976	1.47460264890265	1.48122630083922	1.44774613853805	1.48442785702075	1.39270512143434	1.09489530467231	1.36463986694826	1.05635471634031	0.981290095414121	1.01382357392856
ENSMUSG00000039046	144.967647351379	109.156610854881	119.1517823515	146.795603747022	123.571103883166	102.466470249157	88.9224388207964	75.5161047643654	75.1160961306125	96.2239244643017	117.470539296003	81.8438935505945	124.351536406184	89.1821661711123	0.486293662651404	0.00143634777379616	0.0888939677782732	Usp6nl	2	6327478	6451201	+	8059	protein_coding	USP6 N-terminal like [Source:MGI Symbol;Acc:MGI:2138893]	-	138	104	112	179	145	99	84	82	69	93	103	95	1.61532876192246	1.22287882584105	1.32286191615616	1.61605357680914	1.37758503721011	1.13670368222124	0.994132511402017	0.850465781331136	0.844140014050324	1.06963887469722	1.30238658550051
ENSMUSG00000048445	110.301470810832	151.139922722143	178.72767352725	150.896039605877	129.536605449939	170.777450415262	59.2816258805309	63.5440393748928	133.902606145874	135.541226933586	69.5699310393807	101.658730936528	148.563193755217	93.9163600517988	0.661417575026199	0.0014916953646497	0.0914230641285956	Ccdc57	11	120717355	120823698	-	3743	protein_coding	coiled-coil domain containing 57 [Source:MGI Symbol;Acc:MGI:1918526]	-	105	144	168	184	152	165	56	69	123	131	61	118	2.64625972674592	3.64564105785474	4.27235273135285	3.57669473548821	3.10924776891336	4.07903418604551	1.42696836929181	1.54082533734707	3.23990172150326	3.24404488247659	1.66071020090698
ENSMUSG00000071637	831.988236973133	668.584241486147	1006.40701879035	935.719462990793	579.505866486571	1120.92108363472	112.211648988148	221.943673758684	496.419417906657	521.471590645248	150.544768806529	582.383916212651	857.187651726951	347.495836052986	1.30220233112523	0.00154455841483737	0.0941958707636609	Cebpd	16	15705150	15708895	+	3746	protein_coding	CCAAT/enhancer binding protein (C/EBP), delta [Source:MGI Symbol;Acc:MGI:103573]	TF_bZIP	792	637	946	1141	680	1083	106	241	456	504	132	676	19.9443737434478	16.113982995702	24.0381483021369	22.1616326090117	13.8986529339173	26.751855603412	2.698884125274	5.37741330378803	12.0017236325263	12.4709101159005	3.59078997148135
ENSMUSG00000058740	12.6058823783808	4.1983311867262	5.31927599783482	18.0419177789636	13.6354321526252	21.7353118710333	2.11720092430468	0.920928106882504	3.26591722307011	3.10399756336457	2.28098134555346	8.61514668953626	12.5893585609273	3.3840286421186	1.87468569866562	0.00159174033331776	0.0956964394678465	Kcnt1	2	25753746	25808285	+	9499	protein_coding	potassium channel, subfamily T, member 1 [Source:MGI Symbol;Acc:MGI:1924627]	-	12	4	5	22	16	21	2	1	3	3	2	10	0.119169839317943	0.0399037164132783	0.0501036959825775	0.168511161751873	0.128965535419714	0.204566556687457	0.0200815973345286	0.00879926222240034	0.031137943001925	0.0292737764966257	0.0214553672845453
ENSMUSG00000052684	2013.78970994633	1846.21613936285	1838.34178485171	1485.17786807741	1838.22669707578	2000.68370698606	1098.82727971413	1344.55503604846	1729.8474891528	1660.63869640005	1295.59740427437	1596.38668157107	1837.07265105003	1454.30876452681	0.336577648928582	0.00163083343117102	0.0971717443670264	Jun	4	94937271	94940459	-	3189	protein_coding	jun proto-oncogene [Source:MGI Symbol;Acc:MGI:96646]	TF_bZIP	1917	1759	1728	1811	2157	1933	1038	1460	1589	1605	1136	1853	56.7062057112143	52.26880389518	51.5782812206544	41.3188105226228	51.7877683128169	56.0880786121345	31.0448081871673	38.2668297591245	49.1265120094208	46.650457062927	36.3000863025365
ENSMUSG00000115338	65.1303922883009	51.4295570373959	60.6397463753169	47.5650559627222	57.9505866486571	64.1709207620983	22.2306097051991	25.7859869927101	44.6342020486248	40.3519683237394	10.2644160549906	47.3833067924495	57.8143765124152	31.7750816529523	0.853829139133549	0.00164213097412588	0.0971717443670264	Pnp	14	51168539	51202694	+	3979	protein_coding	purine-nucleoside phosphorylase [Source:MGI Symbol;Acc:MGI:97365]	-	62	49	57	58	68	62	21	28	41	39	9	55	1.46987615875494	1.16695304776808	1.36357353424955	1.06056657083667	1.30847835864424	1.44181977719213	0.503374837232273	0.588177273640679	1.01591288796069	0.908502346880828	0.230490173978771
ENSMUSG00000099719	3.1514705945952	3.14874839004465	10.6385519956696	0	2.55664352861722	5.17507425500793	1.05860046215234	0	0	0	0	0	4.11174812732244	0.176433410358723	3.96960589314747	0.0016620881866551	0.097753497139361	Gm28802	1	58889244	58931951	-	944	unprocessed_pseudogene	predicted gene 28802 [Source:MGI Symbol;Acc:MGI:5579508]	-	3	3	10	0	3	5	1	0	0	0	0	0	0.299786627034201	0.301148359806459	1.00833688164937	0	0.243321693780164	0.490107375397032	0.101035536589347	0	0	0	0
ENSMUSG00000024065	176.482353297331	134.346597975238	178.72767352725	136.954557685769	158.511898774268	168.707420713258	92.0982402072534	121.562510108491	92.5343213203197	106.57058300885	100.363179204352	163.687787101189	158.955083662186	112.802770158409	0.4865442679231	0.00171251389685804	0.0997895020883001	Ehd3	17	74111129	74139089	+	6558	protein_coding	EH-domain containing 3 [Source:MGI Symbol;Acc:MGI:1928900]	-	168	128	168	167	186	163	87	132	85	103	88	190	2.41657826342421	1.84956585402735	2.43845932806553	1.85280169089339	2.17156634546591	2.29990247231144	1.26530139509147	1.68238995490648	1.27789174793633	1.45579826689891	1.36739851917954
ENSMUSG00000041912	127.109313982006	156.387836705551	130.854189546737	164.017434354214	155.955255245651	141.797034587217	87.8638383586441	112.353229039666	104.509351138243	133.471895224677	86.6772911310317	123.196597660369	146.020177403563	108.012033758772	0.433409434524829	0.00174647522160643	0.101456281431848	Tdrkh	3	94320580	94341975	+	6142	protein_coding	tudor and KH domain containing protein [Source:MGI Symbol;Acc:MGI:1919884]	-	121	149	123	200	183	137	83	122	96	129	76	143	1.85839724771272	2.29883445657969	1.90621966789437	2.36921276084344	2.28124982328833	2.06397286373648	1.2888857640587	1.66025258967288	1.54101892842871	1.94677286331524	1.26092026795247
ENSMUSG00000038970	1050.4901981984	937.277437436623	985.129914799008	1037.41027229041	1061.85927888569	1011.20950942855	821.473958630215	805.812093522191	803.415636875247	790.484712803511	1034.4250402085	907.174946408169	1013.89610183978	860.464398074638	0.237624468030158	0.00177647238118301	0.102247716433082	Lmtk2	5	144037254	144125022	+	8114	protein_coding	lemur tyrosine kinase 2 [Source:MGI Symbol;Acc:MGI:3036247]	-	1000	893	926	1265	1246	977	776	875	738	764	907	1053	11.625937717537	10.4291207842399	10.8630963159047	11.3432995705152	11.7574897685021	11.1417340655701	9.12163866345903	9.01357750422211	8.96742825505549	8.72757803990082	11.3908499007368
ENSMUSG00000027340	412.842647891972	326.420249767962	314.901139071821	263.247982138514	307.649437943606	337.414841426517	237.126503522124	238.520379682569	207.93006320213	290.741105101815	233.80058791923	298.084075457955	327.079383040065	251.033785814304	0.377741410160763	0.00178169534390733	0.102247716433082	Slc23a2	2	131894416	131987028	-	7951	protein_coding	solute carrier family 23 (nucleobase transporters), member 2 [Source:MGI Symbol;Acc:MGI:1859682]	-	393	311	296	321	361	326	224	259	191	281	205	346	4.66266047611086	3.70655012222444	3.54362375572877	2.93742751443166	3.47629816346704	3.79392791181447	2.68702935794704	2.72271483955483	2.36841698024901	3.27581941166925	2.62733803523825
ENSMUSG00000068114	211.148529837879	228.809049676578	311.70957347312	234.544931126527	255.664352861722	417.110984953639	114.328849912453	117.878797680961	191.60047708678	257.631797759259	155.106731497636	232.608960617479	276.497903654911	178.192602425761	0.632456343873377	0.0019519039760933	0.110482603509736	Ccdc134	15	82012123	82026404	+	5349	protein_coding	coiled-coil domain containing 134 [Source:MGI Symbol;Acc:MGI:1923707]	-	201	218	293	286	300	403	108	128	176	249	136	270	3.54475688664407	3.86202550391294	5.21401971899726	3.89024823915752	4.29417982666806	6.97149108383038	1.92573846071361	2.0001451779537	3.24404314957626	4.31481455302676	2.59089704633407
ENSMUSG00000070304	78.7867648648801	43.0328946639435	42.5542079826785	53.3056661651197	26.4186497957113	50.7157276990777	22.2306097051991	13.8139216032376	25.0386987102042	36.21330490592	6.84294403666039	37.9066454339596	49.1356518619018	23.6743540658635	1.04373306647126	0.00202430581148467	0.113421016147623	Scn2b	9	45029080	45041368	+	4656	protein_coding	sodium channel, voltage-gated, type II, beta [Source:MGI Symbol;Acc:MGI:106921]	-	75	41	40	65	31	49	21	15	23	35	6	44	1.51953702706339	0.834453473507246	0.817757745942447	1.01574399754245	0.509777065204947	0.973814723211559	0.430182233107219	0.269278968590789	0.487036395563543	0.696771628218117	0.131317354275706
ENSMUSG00000026675	156.523039531562	171.081995859093	177.663818327683	184.519613648491	199.418195232143	203.897925647312	111.153048525996	145.506640887436	175.270890971429	133.471895224677	132.296918042101	142.149920377348	182.184098041047	139.974885671498	0.381389952694127	0.00205625012014241	0.114870987537631	Hsd17b7	1	169777104	169796810	-	5104	protein_coding	hydroxysteroid (17-beta) dehydrogenase 7 [Source:MGI Symbol;Acc:MGI:1330808]	-	149	163	167	225	234	197	105	158	161	129	116	165	2.75383932942284	3.02627353841037	3.11446498272454	3.20741925435696	3.51023960744926	3.57148465469574	1.96211645508152	2.58744167562535	3.11000983624745	2.34268787744558	2.31596061177154
ENSMUSG00000032712	204.845588648688	217.263638913081	179.791528726817	232.084669611213	204.531482289378	223.563207816342	171.493274868679	204.446039727916	146.966275038155	154.165212313774	167.65212889818	124.058112329322	210.34668600092	161.463507196004	0.383433296760247	0.00208378478062307	0.115388058992514	Resf1	6	149210912	149237161	+	9629	protein_coding	retroelement silencing factor 1 [Source:MGI Symbol;Acc:MGI:1914496]	-	195	207	169	283	240	216	162	222	135	149	147	144	1.91036529596205	2.03713776761383	1.67064111279275	2.13840089932465	1.90836580270827	2.07570576950787	1.60464872152203	1.92706310009647	1.38228989779706	1.43430154873388	1.55567901515613
ENSMUSG00000034610	544.153922666772	507.99807359387	609.58902935187	546.998143571305	578.653651977032	799.031464973224	396.975173307127	427.310641593482	459.405689378529	493.535612574967	420.841058254614	584.106945550559	597.737381022345	463.695853443213	0.364643923928306	0.00213413101634842	0.117488875545368	Tut4	4	108316623	108416618	+	8684	protein_coding	terminal uridylyl transferase 4 [Source:MGI Symbol;Acc:MGI:2445126]	-	518	484	573	667	679	772	375	464	422	477	369	678	5.62694850018071	5.28149397367312	6.28076369560946	5.58843107227428	5.98661776418064	8.22603804130226	4.11867572001714	4.46603696668235	4.79114360827462	5.09136168444152	4.33002493006941
ENSMUSG00000031833	87.1906864504673	76.6195441577531	114.896361553232	81.1886300053361	86.0736654634465	114.886648461176	75.160632812816	64.4649674817753	59.8751490896187	63.1146171217463	69.5699310393807	66.3366295094292	93.4759226819018	66.4203211757944	0.490046710949157	0.00214731143718467	0.117871837673633	Mast3	8	71230761	71257698	-	5955	protein_coding	microtubule associated serine/threonine kinase 3 [Source:MGI Symbol;Acc:MGI:2683541]	-	83	73	108	99	101	111	71	70	55	61	61	77	1.31479886937496	1.16164208065954	1.72631337964596	1.20958755074134	1.29858738157156	1.72478291263149	1.13716302340292	0.982517788335962	0.910599643528726	0.949474826724225	1.04383514391181
ENSMUSG00000089703	37.8176471351424	64.0245505975745	80.8529951670892	79.548455661794	54.5417286105008	76.5910989741173	13.7618060079804	46.0464053441252	42.4569238999114	36.21330490592	23.9503041283114	54.2754241440785	65.5627460243697	36.1173614050545	0.851704886281282	0.00219798243465684	0.119613193527389	Gm15833	1	44251322	44252278	+	957	processed_pseudogene	predicted gene 15833 [Source:MGI Symbol;Acc:MGI:3801794]	-	36	61	76	97	64	74	13	50	39	35	21	63	3.54857148489386	6.04016967993562	7.55926031735137	7.37468841890668	5.12034951286045	7.15505555187775	1.29561975446653	4.36699016983181	4.01790090645633	3.38993594669128	2.2360999010208
ENSMUSG00000020022	1429.71715974802	685.377566233052	675.548051725022	1692.65992253549	1101.91336083402	1364.14957362009	744.196124893094	567.291713839623	708.704037406214	659.082149287744	854.227513909772	690.073249831855	1158.22760578262	703.92913152805	0.718899886760679	0.00230149278848671	0.124114211927962	Ndufa12	10	94034582	94057305	+	1569	protein_coding	NADH:ubiquinone oxidoreductase subunit A12 [Source:MGI Symbol;Acc:MGI:1913664]	-	1361	653	635	2064	1293	1318	703	616	651	637	749	801	81.8272916565772	39.4385990508212	38.5237387084704	95.7129339067407	63.0967734978792	77.7294678916486	42.73449025995	32.8157184066015	40.907656191738	37.6315298648188	48.6455053674589
ENSMUSG00000086765	45.1710785225312	67.1732989876191	65.9590223731517	52.4855789933486	34.088580381563	60.0308613580919	20.1134087808944	23.9441307789451	33.7478113050578	36.21330490592	4.56196269110693	43.9372481166349	54.1514034360509	27.0863110964265	0.98732659273441	0.00239449964240231	0.127243809601865	Gm11827	4	11122805	11126998	+	1423	lncRNA	predicted gene 11827 [Source:MGI Symbol;Acc:MGI:3649801]	-	43	64	62	64	40	58	19	26	31	35	4	51	2.85053613599726	4.26193003187328	4.14729030282322	3.27234401171618	2.15221999464488	3.77151918731388	1.27348797207767	1.52718832615257	2.14784702221453	2.27980934714234	0.286443476930282
ENSMUSG00000048003	79.8372550630785	53.528722630759	60.6397463753169	52.4855789933486	65.6205172345087	96.2563811431474	31.7580138645702	26.7069150995926	43.5455629742681	58.9759537039269	51.322080274953	41.3527041097741	68.0613669066932	42.2768716711808	0.688879210572635	0.00239867145569044	0.127243809601865	Catsper4	4	133939281	133954694	-	2101	protein_coding	cation channel, sperm associated 4 [Source:MGI Symbol;Acc:MGI:3043288]	-	76	51	57	64	77	93	30	29	40	57	45	48	3.41232615737612	2.30025172687961	2.58241746443548	2.21634722925851	2.80605541448398	4.09590734896299	1.36188786111866	1.15370850245923	1.87707009725709	2.51468846067944	2.18258068125067
ENSMUSG00000042073	157.57352972976	126.999518398467	132.98189994587	126.293424452745	117.605602316392	140.762019736216	105.860046215234	102.223019863958	95.8002385433899	108.63991471776	94.6607258404688	108.550848288157	133.702665763242	102.622465578161	0.376470465178693	0.00241665922753014	0.127715996268556	Abhd14b	9	106324658	106330122	+	2671	protein_coding	abhydrolase domain containing 14b [Source:MGI Symbol;Acc:MGI:1923741]	-	150	121	125	154	138	136	100	111	88	105	83	126	5.29761467465903	4.29282044808848	4.45465189197402	4.19498789905178	3.95582225035935	4.71148972541913	3.5708553553105	3.47354747113982	3.24829404849933	3.64376866452664	3.16656239393099
ENSMUSG00000068699	21504.5848473195	20175.0805178127	18662.1479108037	21087.7215349213	16068.5045773593	20646.4762477796	16148.9500501339	17895.4749729408	14864.2779212664	19445.5100686246	14021.1923311171	15853.5929380846	19690.7526059993	16371.4997136946	0.266277416768874	0.00242780434347238	0.127715996268556	Flnc	6	29433255	29461882	+	9402	protein_coding	filamin C, gamma [Source:MGI Symbol;Acc:MGI:95557]	-	20471	19222	17542	25714	18855	19948	15255	19432	13654	18794	12294	18402	205.391187962283	193.73566053168	177.597360407693	198.990925674516	153.545771332212	196.32352385987	154.752656080934	172.751331210432	143.181267926503	185.282482651973	133.2468059444
ENSMUSG00000030287	183.83578468472	123.850770008423	160.642135134611	180.419177789636	202.8270532703	148.007123693227	130.207856844738	108.669516612136	83.8252087254661	154.165212313774	112.908576604896	131.811744349905	166.597007430153	120.264685908486	0.471321579646252	0.00253560727839061	0.131921238016927	Itpr2	6	146009797	146403721	-	14802	protein_coding	inositol 1,4,5-triphosphate receptor 2 [Source:MGI Symbol;Acc:MGI:99418]	-	175	118	151	220	238	143	123	118	77	149	99	153	1.11527160262239	0.755427602025878	0.971033458031538	1.08139949025878	1.23108524940271	0.893941019046022	0.792557642511975	0.666324458746692	0.51288131523436	0.933042130303915	0.681551440675371
ENSMUSG00000042529	1069.39902176597	1288.88767432494	1197.9009547124	1398.24862786968	1268.94740470368	1675.68904377157	941.095810853429	915.402538241209	1207.30073346158	1108.12713012115	967.136090514669	1193.19781650077	1316.51212119137	1055.37668661547	0.318947729150727	0.00255145639282606	0.132382140184493	Kcnj12	11	60913390	60961957	+	2750	protein_coding	potassium inwardly-rectifying channel, subfamily J, member 12 [Source:MGI Symbol;Acc:MGI:108495]	-	1018	1228	1126	1705	1489	1619	889	994	1109	1071	848	1385	34.9203091256789	42.3152503557772	38.9747504846513	45.1102848090112	41.4565898090301	54.4762724134398	30.8329595906783	30.2118860725372	39.7599110930899	36.0987499091261	31.4229535805163
ENSMUSG00000038068	738.494609333476	748.352534033945	975.555218002906	1194.86700927045	705.633613898354	1394.16500429914	443.55359364183	445.729203731132	916.634100608344	630.111505363008	391.188300762419	573.768769523115	959.511331473044	566.830912271641	0.759491421132761	0.00257477283986066	0.133226907216615	Rnf144b	13	47276132	47401467	+	4936	protein_coding	ring finger protein 144B [Source:MGI Symbol;Acc:MGI:2384986]	-	703	713	917	1457	828	1347	419	484	842	609	343	666	13.4351701021043	13.6881772576751	17.6836467772694	21.476736082086	12.8435995511059	25.2514122819632	8.0962706645875	8.19585673737462	16.8183541277951	11.4360890188642	7.08113402610538
ENSMUSG00000032643	2946.62500594651	2951.42682426852	3096.88248593943	2630.01955986983	2442.44678433899	2759.34959277023	2505.70729391459	1752.52618739741	2615.99969567916	2355.93415059371	2485.1291759805	2182.21665645954	2804.45837552225	2316.25219333748	0.276098491615135	0.00264255120795326	0.135255769665456	Fhl3	4	124594494	124602404	+	1683	protein_coding	four and a half LIM domains 3 [Source:MGI Symbol;Acc:MGI:1341092]	-	2805	2812	2911	3207	2866	2666	2367	1903	2403	2277	2179	2533	157.221431066825	158.329719401925	164.640143635316	138.643247831732	130.383801903151	146.578157111255	134.140613583478	94.5102300009835	140.771976102676	125.404840542221	131.934069883665
ENSMUSG00000033502	489.528432360455	307.527759427694	421.286659028518	579.801630442148	726.086762127292	639.63917791898	311.228535872787	357.320105470412	397.353262140197	428.351663744311	393.469282107973	388.543115698086	527.311736884181	379.377660838961	0.476417493145164	0.00265196129351795	0.135371544411437	Cdc14a	3	116066202	116222394	-	12456	protein_coding	CDC14 cell division cycle 14A [Source:MGI Symbol;Acc:MGI:2442676]	-	466	293	396	707	852	618	294	388	365	414	345	451	3.52915158367729	2.22905232111936	3.02617635232575	4.12975886215879	5.23712048937755	4.59095571527979	2.25120413317766	2.60361805058007	2.88908831112126	3.08075475320486	2.82243754710116
ENSMUSG00000017009	324.601471243306	301.230262647605	307.454152674852	343.616524972079	278.674144619277	369.500301807566	222.306097051991	268.911007209691	255.830182473825	244.181141651346	210.990774463695	318.760427512842	320.846142994114	253.496605060565	0.335938333944429	0.00274857789612399	0.138070472670547	Sdc4	2	164266167	164285807	-	2547	protein_coding	syndecan 4 [Source:MGI Symbol;Acc:MGI:1349164]	-	309	287	289	419	327	357	210	292	235	236	185	370	11.444386855041	10.67785928879	10.8005667335711	11.9693056568611	9.82992893726098	12.9697767073265	7.86387309519911	9.58248292908111	9.09673345572465	8.58852222146075	7.40161734582661
ENSMUSG00000030029	1909.79118032469	2140.09932243368	2113.88028153956	2183.07205125459	2195.30457657266	2856.64098876437	1647.18231910904	1612.54511515127	2249.12832762095	1905.85450390585	1618.35626467018	1823.82655417483	2233.13140014826	1809.48218077202	0.303561929838387	0.0027703012461597	0.138793558200456	Lrig1	6	94581510	94677139	-	5585	protein_coding	leucine-rich repeats and immunoglobulin-like domains 1 [Source:MGI Symbol;Acc:MGI:107935]	-	1818	2039	1987	2662	2576	2760	1556	1751	2066	1842	1419	2117	30.7067389449764	34.5959523323921	33.8650979828543	34.6791746791775	35.3145967722918	45.7276762812692	26.5725089376499	26.2051781433065	36.4715055988385	30.5704501711815	25.8906565365386
ENSMUSG00000047298	7.35343138738881	8.39666237345239	0	4.10043585885536	3.4088580381563	9.31513365901427	0	0	2.17727814871341	0	1.14049067277673	0	5.42908688614452	0.552961470248356	3.39922940744608	0.00286079455277399	0.141701869145774	Kcnv2	19	27299988	27314579	+	5108	protein_coding	potassium channel, subfamily V, member 2 [Source:MGI Symbol;Acc:MGI:2670981]	-	7	8	0	5	4	9	0	0	2	0	1	0	0.129273690383842	0.148412451922369	0	0.0712201682512745	0.059957107525052	0.163036502011479	0	0	0.0386034091066674	0	0.0199495432494025
ENSMUSG00000037486	317.248039855917	326.420249767962	412.775817431982	424.805154977415	389.462030859357	394.340658231604	269.943117848846	275.357503957869	268.893851366106	344.543729533467	306.791990976941	349.774955595172	377.508658520706	302.550858213067	0.319563698879016	0.00286256050458389	0.141701869145774	Asxl2	12	3476857	3556852	+	15941	protein_coding	ASXL transcriptional regulator 2 [Source:MGI Symbol;Acc:MGI:1922552]	-	302	311	388	518	457	381	255	299	247	333	269	406	1.78712272186869	1.84874098374045	2.31682809306492	2.36427547661314	2.19498829580563	2.21157993933628	1.52570568771016	1.5677607027993	1.52766434941546	1.93626171046363	1.71957278721084
ENSMUSG00000039810	86.1401962522689	76.6195441577531	103.193954357995	102.510896471384	111.640100749619	95.2213662921458	63.5160277291403	70.9114642299528	67.4956226101156	56.9066219950171	62.7269870027203	90.4590402401308	95.8876763801943	68.6692939678462	0.478710900278654	0.00294183010804882	0.14508431923497	Zc3h10	10	128377832	128383643	-	4384	protein_coding	zinc finger CCCH type containing 10 [Source:MGI Symbol;Acc:MGI:2143670]	-	82	73	97	125	131	92	60	77	62	55	55	105	1.76443759317696	1.57791482443604	2.10609926046692	2.07454732793972	2.28787514747796	1.94182688587963	1.30534963330762	1.46806176379898	1.39433682144675	1.16286026169249	1.27842716251988
ENSMUSG00000030056	316.197549657719	326.420249767962	365.966188651036	321.47417133426	319.580441077153	324.994663214498	265.708716000237	270.752863423456	252.564265250755	271.082453867173	261.172364065872	321.344971519703	329.105543950438	273.770939021199	0.261710675268133	0.00296759760008668	0.145405070440222	Isy1	6	87791251	87815780	-	6732	protein_coding	ISY1 splicing factor homolog [Source:MGI Symbol;Acc:MGI:1923310]	-	301	311	344	392	375	314	251	294	232	262	229	373	4.2177941845913	4.37771539242521	4.86398225786231	4.23668172357647	4.26499700921855	4.3159734933359	3.55611470315303	3.65029001843	3.39774224467549	3.60738561946223	3.46637241892604
ENSMUSG00000026605	17.8583333693728	1.04958279668155	5.31927599783482	0.820087171771072	3.4088580381563	6.21008910600951	2.11720092430468	0	1.0886390743567	0	0	0	5.77770441330434	0.534306666443563	3.4807563178485	0.00301940255664609	0.145405070440222	Cenpf	1	189372803	189420283	-	15433	protein_coding	centromere protein F [Source:MGI Symbol;Acc:MGI:1313302]	-	17	1	5	1	4	6	2	0	1	0	0	0	0.103911008675022	0.00614017692946495	0.0308387875421826	0.00471447702232243	0.0198445477378323	0.035974446630581	0.0123602081954699	0	0.00638846023834825	0	0
ENSMUSG00000026510	233.208824000045	270.79236154384	278.730062286544	246.846238703093	294.014005790981	268.068846409411	215.954494279077	240.362235896334	203.575506904703	217.27982943552	230.3791159009	200.732917866195	265.276723122319	218.047350047122	0.283568119691855	0.00302814004382917	0.145405070440222	Trp53bp2	1	182236737	182289997	+	4418	protein_coding	transformation related protein 53 binding protein 2 [Source:MGI Symbol;Acc:MGI:2138319]	-	222	258	262	301	345	259	204	261	187	210	202	233	4.74013006294729	5.53382264430231	5.64486066692114	4.95706557028884	5.97895044743652	5.42459451584756	4.40403338484157	4.9378619449981	4.1731351250625	4.40584250925788	4.65918015333307
ENSMUSG00000043079	4088.50785138818	4361.01652021184	3791.57993125666	3984.80356763564	3562.25664987333	3748.82379032774	3422.45529413851	3619.24746004824	3744.91841578706	3395.77333432084	3094.15119524327	3365.07629693286	3922.83138511556	3440.27033274513	0.189123780089843	0.00308611006471128	0.146846111571614	Synpo	18	60727045	60793214	-	9533	protein_coding	synaptopodin [Source:MGI Symbol;Acc:MGI:1099446]	-	3892	4155	3564	4859	4180	3622	3233	3930	3440	3282	2713	3906	38.5129010623362	41.3021516359338	35.5865387392348	37.0852478296081	33.5720807692934	35.1570220187038	32.3461248258607	34.4577650238941	35.5774979117795	31.9112906344218	29.0004038758411
ENSMUSG00000029174	3289.08481055919	3703.97768948919	4524.5761637583	4003.66557258637	3777.01470627718	6015.50631402121	1347.59838831993	1540.71272281443	2233.88738057995	3997.94886161357	2025.51143485148	3039.42375206839	4218.97087611524	2364.18042337463	0.835503301933346	0.00312163206340415	0.148157451585347	Tbc1d1	5	64313648	64508829	+	7405	protein_coding	TBC1 domain family, member 1 [Source:MGI Symbol;Acc:MGI:1889508]	-	3131	3529	4253	4882	4432	5812	1273	1673	2052	3864	1776	3528	39.8860473196675	45.1604059553727	54.6698606242554	47.9685501160055	45.8253994603195	72.6262751687326	16.3964371027491	18.8840449650266	27.3211418330176	48.3668095325569	24.4400305261682
ENSMUSG00000073557	7551.9740348483	7041.65098293651	6650.15885249309	8031.93376032588	6927.65174804314	8228.3680654626	5129.97783959023	5359.80158205618	4672.43890713897	7782.75655720944	6270.41771892647	6567.32632143349	7405.28957401825	5963.7864877258	0.312308134435523	0.00313713898435547	0.148157451585347	Ppp1r12b	1	134682396	134883680	-	14983	protein_coding	protein phosphatase 1, regulatory subunit 12B [Source:MGI Symbol;Acc:MGI:1916417]	-	7189	6709	6251	9794	8129	7950	4846	5820	4292	7522	5498	7623	45.2618915279747	42.4316826307328	39.712604096293	47.5603672785561	41.5403273489859	49.0977485267255	30.8482674053597	32.4674628959741	28.2427827962608	46.5339517525544	37.3929562514101
ENSMUSG00000038007	93.4936276396577	85.0162065312055	135.109610345004	185.339700820262	78.4037348775949	171.812465266263	57.1644249562263	40.5208367028302	66.4069835357589	130.367897661312	44.4791362382926	86.1514668953626	124.862557579998	70.8484576649638	0.817238632473806	0.00316715053720146	0.148832498445462	Acer2	4	86792633	86853059	+	7159	protein_coding	alkaline ceramidase 2 [Source:MGI Symbol;Acc:MGI:1920932]	-	89	81	127	226	92	166	54	44	61	126	39	100	1.17273703296109	1.07217060968669	1.68860863342897	2.29688872721378	0.983936418560304	2.14560095416165	0.719428343788036	0.513717619978426	0.840086536997365	1.631374119785	0.555131779550212
ENSMUSG00000018906	467.468138198288	555.229299444539	428.733645425486	487.131780032017	472.979052794186	487.491994821747	458.374000111963	374.817739501179	463.760245675955	375.583705167113	371.799959325215	335.990720891914	483.172318452711	396.72106177889	0.286134553446776	0.00318329273241191	0.149220786550536	P4ha2	11	53990921	54022491	+	6239	protein_coding	procollagen-proline, 2-oxoglutarate 4-dioxygenase (proline 4-hydroxylase), alpha II polypeptide [Source:MGI Symbol;Acc:MGI:894286]	-	445	529	403	594	555	471	433	407	426	363	326	390	6.72834141606706	8.0347418564252	6.1484791883256	6.9271619150486	6.81097942006215	6.98552658049462	6.61940657989561	5.45259914780997	6.73195440322015	5.39295783874261	5.32459352704777
ENSMUSG00000065947	1575.7352972976	344.263157311548	325.539691067491	1253.91328563797	939.14038951206	1808.17094469977	394.857972382822	361.924746004824	276.514324886603	359.029051495835	703.682745103244	441.95702517321	1041.12712758774	422.99431084109	1.29959217716913	0.00325471861841723	0.15144437640193	mt-Nd4l	MT	9877	10173	+	297	protein_coding	mitochondrially encoded NADH dehydrogenase 4L [Source:MGI Symbol;Acc:MGI:102497]	-	1500	328	306	1529	1102	1747	373	393	254	347	617	513	476.42857899038	104.652265929959	98.0714562224796	374.57166000314	284.090503006935	544.289158295469	119.783922086021	110.60130436794	84.3186839799355	108.295001370014	211.69595517971
ENSMUSG00000048756	890.815688072244	968.76492133707	934.064865219794	1159.6032608843	1074.64249652877	1214.07242022486	726.199917036504	718.323923368353	1076.66404453878	825.663351854976	648.939192809961	922.682210449334	1040.32727537784	819.745440009651	0.343995483048229	0.00332667850908913	0.154413327463554	Foxo3	10	42057837	42152751	-	7571	protein_coding	forkhead box O3 [Source:MGI Symbol;Acc:MGI:1890081]	Fork_head	848	923	878	1414	1261	1173	686	780	989	798	569	1071	10.5658782362701	11.5525989380393	11.0387250599817	13.5887667116761	12.7524435842384	14.336330156271	8.64205480473856	8.61123624930036	12.8792210649829	9.76978554780412	7.65848499224837
ENSMUSG00000026435	60.9284314955072	27.2891527137203	41.4903527831116	38.5440970732404	50.2806560628054	49.6807128480761	20.1134087808944	24.8650588858276	21.7727814871341	31.0399756336457	15.9668694188743	40.4911894408204	44.7022338294102	25.7082139411994	0.785336678017058	0.00338737403092968	0.156093725317429	Slc45a3	1	131890705	131910707	+	3563	protein_coding	solute carrier family 45, member 3 [Source:MGI Symbol;Acc:MGI:1922082]	-	58	26	39	47	59	48	19	27	20	30	14	47	1.53558961580845	0.691494559181377	1.04190094400234	0.959767224984169	1.26784966383946	1.24657566062253	0.508608864514882	0.633391293843862	0.553427487277174	0.780442332139903	0.400401834648126
ENSMUSG00000059439	702.77794259473	678.030486656281	706.399852512464	684.772788428845	691.998181745729	753.490811529154	567.409847713653	628.993897000751	607.46060349104	601.140861438272	623.848398008873	668.535383108014	702.911677244534	616.231498460101	0.188169254099664	0.0033937666147372	0.156093725317429	Bcas3	11	85243993	85716884	+	6085	protein_coding	BCAS3 microtubule associated cell migration factor [Source:MGI Symbol;Acc:MGI:2385848]	-	669	646	664	835	812	728	536	683	558	581	547	776	10.3711885670047	10.060120370891	10.3868807034993	9.98411954714777	10.2170852528031	11.070418136692	8.40137468292919	9.3817589209444	9.04107701347627	8.85015619331585	9.1603188174392
ENSMUSG00000044702	13.6563725765792	9.44624517013394	7.44698639696875	36.0838355579272	15.3398611717033	23.8053415730365	4.23440184860935	7.36742485506003	9.79775166921033	6.20799512672914	4.56196269110693	9.47666135848989	17.6297737410581	6.94103292486761	1.34739137615175	0.0034390496100425	0.157315752451654	Palb2	7	121706485	121732208	-	7342	protein_coding	partner and localizer of BRCA2 [Source:MGI Symbol;Acc:MGI:3040695]	-	13	9	7	44	18	23	4	8	9	6	4	11	0.167029033277205	0.116160740257681	0.0907530661119457	0.43603582824327	0.187710987955713	0.289872278251712	0.0519627058242133	0.0910751205127549	0.120857799199926	0.0757481893057606	0.055517443158784
ENSMUSG00000001930	829.887256576737	690.625480216459	914.915471627589	843.049612580662	1048.22384673306	811.451643185243	738.903122582332	812.258590270369	701.083563885717	631.146171217463	695.699310393807	646.13600171522	856.358885153292	704.204460010818	0.28295773585142	0.0034622863935445	0.157645427335896	Vwf	6	125523737	125663642	+	16064	protein_coding	Von Willebrand factor [Source:MGI Symbol;Acc:MGI:98941]	-	790	658	860	1028	1230	784	698	882	644	610	610	750	4.63912838182739	3.88153440385338	5.09591766682163	4.6561107167764	5.86250176548023	4.51601728214444	4.1442683942455	4.58922168900724	3.95256230184437	3.51974763019345	3.86954574327367
ENSMUSG00000002831	9864.10296108298	10434.952164608	12338.5926045776	12702.3302035621	9204.76891753154	16204.1925072808	4294.74207495204	3965.51642823606	8790.76052543038	9801.38963925086	4599.59888330856	9306.08145403707	11791.4898931072	6793.01483420249	0.795603095710316	0.00347311568339709	0.157645427335896	Plin4	17	56407591	56416803	-	6350	protein_coding	perilipin 4 [Source:MGI Symbol;Acc:MGI:1929709]	-	9390	9942	11598	15489	10801	15656	4057	4306	8075	9473	4033	10802	139.493786241023	148.364936565714	173.854936201271	177.473508104337	130.233229821861	228.139410687869	60.9364891833344	56.6792960800946	125.376273682175	138.276760874768	64.719975193714
ENSMUSG00000022003	226.905882810855	198.371148572813	231.920433505598	243.565890016008	294.014005790981	258.753712750396	160.907270247155	200.762327300386	223.171010243124	187.274519656329	174.49507293484	201.594432535149	242.255178907775	191.367438819497	0.341360093407913	0.00347955373462902	0.157645427335896	Slc25a30	14	75997557	76024477	-	4571	protein_coding	solute carrier family 25, member 30 [Source:MGI Symbol;Acc:MGI:1914804]	-	216	189	218	297	345	250	152	218	205	181	153	234	4.45764547500778	3.91815691411283	4.53965573284594	4.72747354933146	5.77882368776516	5.06083310407786	3.17160076003767	3.98629486401807	4.42169916997984	3.67030993454401	3.41086126415358
ENSMUSG00000033863	4528.66324443331	4622.36263658554	4457.55328618558	5262.49938125497	4458.78631390844	4905.97039374751	3752.73863833004	4056.68831081743	4364.35404909602	4615.64437672312	3350.76159661804	4037.91925338565	4705.97254268589	4029.68437082838	0.223823476828604	0.00351763357231987	0.158990321223374	Klf9	19	23118590	23145498	+	4815	protein_coding	Kruppel-like factor 9 [Source:MGI Symbol;Acc:MGI:1333856]	zf-C2H2	4311	4404	4190	6417	5232	4740	3545	4405	4009	4461	2938	4687	84.458765025431	86.6726869850287	82.8314718214053	96.9660327670335	83.1961088372293	91.0909598195864	70.2208520219144	76.4669501769072	82.08925553384	85.8759031306194	62.1783717974935
ENSMUSG00000020848	40.9691177297376	61.9253850042114	71.2782983709866	66.4270609134568	28.1230788147895	84.87121778213	8.46880369721871	1.84185621376501	51.166036494765	16.5546536712777	7.98343470943713	21.5378667238407	58.9323597692186	17.925441918384	1.71893684110343	0.00354381455381226	0.159412731639184	Doc2b	11	75659792	75686875	-	4361	protein_coding	double C2, beta [Source:MGI Symbol;Acc:MGI:1100497]	-	39	59	67	81	33	82	8	2	47	16	7	25	0.843609604898811	1.28202698523126	1.46240062120063	1.3513965683847	0.579374562763866	1.73988680186808	0.174964543068734	0.0383325805322544	1.06257189230592	0.340070751896595	0.163567041601843
ENSMUSG00000031822	621.890197333453	616.105101652069	631.929988542776	546.178056399534	594.845727658274	647.919296726992	526.124429689712	430.07342591413	625.967467755104	497.674275992786	504.096877367316	476.417611931355	609.81139471885	510.059014775067	0.258371543706107	0.00364497655053586	0.163188099087584	Gse1	8	120955195	121308129	+	10351	protein_coding	genetic suppressor element 1, coiled-coil protein [Source:MGI Symbol;Acc:MGI:1098275]	-	592	587	594	666	698	626	497	467	575	481	442	553	5.39513595932145	5.37386849331252	5.46237841434202	4.6814005320978	5.16303042836683	5.59609724367933	4.57952281234187	3.7710189927757	5.47686565970403	4.30723089604341	4.35134788694165
ENSMUSG00000021690	810.978433009165	750.451699627308	742.570929297741	987.38495481237	931.470458926208	901.497935222381	661.625288845211	721.086707689001	654.272083688378	761.514068878775	769.831204124294	745.210188644887	854.059068482529	718.923256978424	0.24982581317225	0.00368141083853466	0.16347075104198	Jmy	13	93566609	93636316	-	8858	protein_coding	junction-mediating and regulatory protein [Source:MGI Symbol;Acc:MGI:1913096]	-	772	715	698	1204	1093	871	625	783	601	736	675	865	8.22137806165652	7.64894622318687	7.50062397111483	9.88950810094202	9.44748163877559	9.09862376672949	6.72961916772575	7.38839717983797	6.68937200518351	7.70153908952003	7.76518742036745
ENSMUSG00000046836	572.517158018128	521.64264995073	548.949282976553	524.035702761715	542.860642576391	577.538286858884	458.374000111963	482.566328006432	390.821427694056	482.154288175963	460.7582318018	526.385462730666	547.923953857067	466.84328975348	0.228388922057061	0.00377167795931153	0.166111714403353	Brox	1	183057916	183078813	-	5010	protein_coding	BRO1 domain and CAAX motif containing [Source:MGI Symbol;Acc:MGI:1918928]	-	545	497	516	639	637	558	433	524	359	466	404	611	10.2617580756191	9.40047729033114	9.80369118560751	9.2799793937796	9.73493995192536	10.3059896289476	8.2432091121694	8.7421390278851	7.06485536171174	8.62151476851061	8.21726862971077
ENSMUSG00000049999	168.078431711744	137.495346365283	237.239709503433	127.933598796287	242.028920709097	176.987539521271	145.02826331487	118.799725787843	124.104854476664	141.749222060315	139.139862078761	118.027509646647	181.627257767853	131.141572894184	0.471210922664673	0.00382807798762512	0.16760143499741	Ppp1r3d	2	178052999	178056265	-	3267	protein_coding	protein phosphatase 1, regulatory subunit 3D [Source:MGI Symbol;Acc:MGI:1917664]	-	160	131	223	156	284	171	137	129	114	137	122	137	4.61991349324005	3.79973581951903	6.49730681450177	3.47423621859146	6.65580785794171	4.84328698904747	3.9996093896624	3.30038590410925	3.44034716310402	3.88693088490749	3.8053494227088
ENSMUSG00000028980	1100.91372771192	1142.99566558621	1140.45277393578	1248.99276260734	1327.75020586188	1531.82197948235	940.037210391277	1023.15112674646	1099.52546510027	1101.91913499442	1150.75508883172	975.234605255505	1248.82118586425	1048.43710521994	0.253150129447089	0.00383205308659196	0.16760143499741	H6pd	4	150063932	150093480	-	5236	protein_coding	hexose-6-phosphate dehydrogenase (glucose 1-dehydrogenase) [Source:MGI Symbol;Acc:MGI:2140356]	-	1048	1089	1072	1523	1558	1480	888	1111	1010	1065	1009	1132	18.8809846934339	19.7087682871656	19.4882478504384	21.1633368750228	22.7823954526714	26.1550350005615	16.1755655706312	17.735301211993	19.0181508645937	18.8532121933181	19.637010565357
ENSMUSG00000028149	1504.30196382011	1529.24213476502	1670.25266332013	1464.67568878313	1473.47888699306	1516.29675671732	1298.90276706092	1525.05694499743	1404.34440592015	1285.05499123293	1192.95324372446	1293.99503276835	1526.3746823998	1333.38456428404	0.194034461924395	0.00386899289566707	0.168827160041804	Rap1gds1	3	138631663	138780962	-	7559	protein_coding	RAP1, GTP-GDP dissociation stimulator 1 [Source:MGI Symbol;Acc:MGI:2385189]	-	1432	1457	1570	1786	1729	1465	1227	1656	1290	1242	1046	1502	17.8707042694293	18.2652847936095	19.7702860901561	17.1909940017868	17.5130673751966	17.9335598856748	15.4819750767299	18.311340349856	16.8256525793587	15.2297451538245	14.1010413012533
ENSMUSG00000041798	105.04901981984	258.197367983661	210.643329514259	300.151904868212	111.640100749619	415.040955251636	52.9300231076169	24.8650588858276	161.118583004792	144.85321962368	61.5864963299435	88.7360109022235	233.453779697871	89.0148986423473	1.39161337270758	0.00390073389566279	0.169820916128878	Gck	11	5850820	5900081	-	3033	protein_coding	glucokinase [Source:MGI Symbol;Acc:MGI:1270854]	-	100	246	198	366	131	401	50	27	148	140	54	103	3.11021624266717	7.68588599930709	6.2139882368232	8.77996035017927	3.30697152869877	12.2339074389907	1.57233014408743	0.744072924485882	4.81100554403146	4.27849482490412	1.81428368399907
ENSMUSG00000004031	13.6563725765792	27.2891527137203	25.5325247896071	12.3013075765661	11.078788624008	8.28011880801268	6.35160277291403	8.28835296194254	4.35455629742681	3.10399756336457	3.4214720183302	12.0612053653508	16.3563775147489	6.26353116322149	1.34975129005115	0.00392850244986745	0.170087856016822	Brinp2	1	158072839	158183896	-	8767	protein_coding	bone morphogenic protein/retinoic acid inducible neural-specific 2 [Source:MGI Symbol;Acc:MGI:2443333]	-	13	26	24	15	13	8	6	9	4	3	3	14	0.139879909013487	0.28103058222462	0.2605780813351	0.124487037559317	0.113533471201482	0.0844368860271104	0.0652749263421993	0.0858056035879123	0.0449837375879678	0.0317179882447185	0.0348701723227836
ENSMUSG00000029501	678.616668036167	722.112964116906	672.356486126321	718.396362471459	777.219632699636	673.794668002032	573.761450486567	673.198446131111	581.333265706479	609.418188273911	581.650243116133	659.058721749524	707.082796908753	613.070052577288	0.205142145653957	0.00393380932175351	0.170087856016822	Ankle2	5	110378870	110404517	+	5520	protein_coding	ankyrin repeat and LEM domain containing 2 [Source:MGI Symbol;Acc:MGI:1261856]	-	646	688	632	876	912	651	542	731	534	589	510	765	11.0396787466488	11.8108349963901	10.8982219254904	11.546461399221	12.6499069554812	10.9127734386229	9.36496924363517	11.0688485947055	9.53781142434797	9.89034867949955	9.41488335654954
ENSMUSG00000079477	3303.79167333397	4469.12354827004	4288.40030945443	3746.97828782203	4169.03338066515	4940.12588383057	2823.28743256029	2710.29141855521	3911.48019416363	3977.25554452447	2887.72238347069	3595.10071354348	4152.90884722936	3317.52294780296	0.323949468939317	0.00395990610948344	0.170437958866812	Rab7	6	87976088	88022252	-	2610	protein_coding	RAB7, member RAS oncogene family [Source:MGI Symbol;Acc:MGI:105068]	-	3145	4258	4031	4569	4892	4773	2667	2943	3593	3844	2532	4173	113.669287518429	154.595337414658	147.011035847227	127.369232043241	143.508462492733	169.217063801909	97.4605044532935	94.2483818453101	135.72606626143	136.51433482847	98.8569118146529
ENSMUSG00000059436	386.580392937011	387.296051975492	452.13845981596	456.788554676487	390.314245368896	519.577455202796	341.927949275205	381.264236249357	397.353262140197	370.410375894839	311.353953668048	323.929515526564	432.115859996107	354.373215459035	0.285985540335529	0.00398841856277449	0.170583338928733	Max	12	76984043	77008975	-	3598	protein_coding	Max protein [Source:MGI Symbol;Acc:MGI:96921]	bHLH	368	369	425	557	458	502	323	414	365	358	273	376	9.64827459131602	9.71843756360412	11.2436008037167	11.2636180667662	9.7462127987068	12.9102837082906	8.56224222694023	9.61752513233476	10.0018021132091	9.22268240254198	7.7318840657587
ENSMUSG00000021360	136.563725765792	102.859114074792	137.237320744138	177.138829102551	121.014460354549	127.306826673195	93.1568406694058	105.906732291488	116.484380956167	100.362587882121	70.7104217121574	101.658730936528	133.686712785836	98.0466157413112	0.447937107791976	0.0040175269460754	0.171360192127874	Gcnt2	13	41013230	41114368	+	7051	protein_coding	glucosaminyl (N-acetyl) transferase 2, I-branching enzyme [Source:MGI Symbol;Acc:MGI:1100870]	-	130	98	129	216	142	123	88	115	107	97	62	118	1.73922445372463	1.31706316184065	1.74147258686334	2.22888117419776	1.54194612621583	1.61416387950929	1.19035939519929	1.36323671292253	1.49616542814521	1.27513570109774	0.89603468286949
ENSMUSG00000006764	24.1612745585632	4.1983311867262	17.0216831930714	3.28034868708429	16.1920756812424	5.17507425500793	8.46880369721871	0.920928106882504	4.35455629742681	0	0	1.72302933790725	11.6714645936159	2.57788623990588	2.18742966514054	0.00405018161569247	0.171624593408424	Tph2	10	114914546	115020927	-	2879	protein_coding	tryptophan hydroxylase 2 [Source:MGI Symbol;Acc:MGI:2651811]	-	23	4	16	4	19	5	8	1	4	0	0	2	0.753614362182073	0.13165870170536	0.529000356388751	0.101088605606811	0.505293261507585	0.160702105722403	0.265029653463962	0.0290323695208686	0.136982433981839	0	0
ENSMUSG00000020668	841.442648756919	988.706994474019	1148.96361553232	978.363995922889	1121.51429455342	1231.66767269189	737.84452212018	827.914368087371	1021.14345174659	864.980654324261	823.434265744801	912.34403442189	1051.77653698858	864.610216074182	0.282608607425225	0.00408271547367155	0.172356137973107	Kif3c	12	3415132	3456494	+	7406	protein_coding	kinesin family member 3C [Source:MGI Symbol;Acc:MGI:107979]	-	801	942	1080	1193	1316	1190	697	899	938	836	722	1059	10.2026221672585	12.0530910370499	13.8809022087384	11.7203509310564	13.6051630871308	14.8681345186608	8.97625573030238	10.1461232073551	12.4872176928444	10.4630416805766	9.9343014737724
ENSMUSG00000019841	497.932353946042	539.485557494316	548.949282976553	695.433921661869	724.382333108213	754.525826380156	423.440184860935	422.70600105907	420.214682701687	563.892890677897	579.36926177058	528.970006737527	626.784879261192	489.765504634616	0.35715645632224	0.00408638219188536	0.172356137973107	Rev3l	10	39608114	39751207	+	13293	protein_coding	REV3 like, DNA directed polymerase zeta catalytic subunit [Source:MGI Symbol;Acc:MGI:1337131]	-	474	514	516	848	850	729	400	459	386	545	508	614	3.36370834239112	3.66413406935608	3.69491407807821	4.64148260399501	4.89584310261549	5.0745525189382	2.87000817092736	2.88611630628275	2.86293080924948	3.80022125938687	3.89425649547262
ENSMUSG00000029414	10.504901981984	0	11.7024071952366	2.46026151531322	0.852214509539075	2.07002970200317	1.05860046215234	0	0	0	1.14049067277673	0	4.59830248401268	0.366515189154845	3.65272330714439	0.00413762021492168	0.173863454761149	Kntc1	5	123887779	123959656	+	7983	protein_coding	kinetochore associated 1 [Source:MGI Symbol;Acc:MGI:2673709]	-	10	0	11	3	1	2	1	0	0	0	1	0	0.118167178554547	0	0.131160844031656	0.027342549374484	0.00959103423643886	0.0231823305712037	0.0119475819291424	0	0	0	0.0127649087959349
ENSMUSG00000042807	93.4936276396577	95.512034498021	86.1722711649241	148.435778090564	98.8568831065326	131.446886077201	58.2230254183786	93.9346669020155	51.166036494765	92.0852610464823	63.867477675497	85.289952226409	108.986246762817	74.0944032939246	0.554409754934299	0.00418201316694618	0.175218949901829	Hecw2	1	53846035	54234327	-	12947	protein_coding	HECT, C2 and WW domain containing E3 ubiquitin protein ligase 2 [Source:MGI Symbol;Acc:MGI:2685817]	-	89	91	81	181	116	127	55	102	47	89	56	99	0.648460988566345	0.666044867557841	0.595516114300129	1.01716944645677	0.685994149370588	0.907669622639983	0.405172245286081	0.658499078455182	0.357911178060256	0.637171356602271	0.440760558230098
ENSMUSG00000120748	2.1009803963968	11.545410763497	2.12771039913393	3.28034868708429	5.96550156677352	0	0	0	1.0886390743567	0	1.14049067277673	0	4.16999196881426	0.371521624522239	3.52395412719148	0.00420945796527237	0.175979503192778	ENSMUSG00000120748	19	46677950	46678570	-	621	lncRNA	novel transcript, antisense to Borcs7	-	2	11	2	4	7	0	0	0	1	0	1	0	0.303809528631547	1.67854244134744	0.306560391715622	0.468653938070866	0.863054080783318	0	0	0	0.158765067404877	0	0.164093827565134
ENSMUSG00000023987	23.1107843603648	25.1899871203572	36.1710767852768	22.1423536378189	19.6009337193987	17.5952524670269	7.41020323506637	3.68371242753002	11.9750298179237	23.7973146524617	11.4049067277673	10.3381760274435	23.9683980150406	11.4348904813654	1.07248417751755	0.00441218255336991	0.182840072638335	Pgc	17	48037767	48045407	+	1388	protein_coding	progastricsin (pepsinogen C) [Source:MGI Symbol;Acc:MGI:98909]	-	22	24	34	27	23	17	7	4	11	23	10	12	1.49518940207644	1.63852479341382	2.33167006869008	1.41533151650472	1.26873213625238	1.13332034011118	0.481010681399427	0.240876633575161	0.781357475102819	1.53593824871597	0.734166188169654
ENSMUSG00000020385	657.606864072199	752.550865220671	648.951671735848	838.949176721806	721.825689579596	730.720484807119	593.874859267462	653.858955886578	593.308295524403	689.087459066935	585.071715134464	606.506326943353	725.100792022873	620.284601970532	0.226146200562498	0.00447371977984329	0.183781573081718	Clk4	11	51152557	51172593	+	5797	protein_coding	CDC like kinase 4 [Source:MGI Symbol;Acc:MGI:1098551]	-	626	717	610	1023	847	706	561	710	545	666	513	704	10.1867120077108	11.7205258489036	10.0162275302566	12.8397395092062	11.1869495746316	11.2692400150632	9.2300851490655	10.2371530470782	9.26914666859471	10.6489383910646	9.01774416575941
ENSMUSG00000054641	67.2313726846976	50.3799742407144	58.512035976183	41.0043585885536	68.177160763126	69.3459950171062	28.5822124781131	39.5999085959477	54.4319537178351	38.2826366148297	19.3883414372044	42.2142187787277	59.1084828783968	37.0832119371096	0.665731640162735	0.00449905183674407	0.184422172476751	Mmrn1	6	60901960	60966362	+	5868	protein_coding	multimerin 1 [Source:MGI Symbol;Acc:MGI:1918195]	-	64	48	55	50	80	67	27	43	50	37	17	49	1.0288519006418	0.775143971799039	0.892175373129438	0.619960155806936	1.04383403284924	1.05652049349391	0.438853741750047	0.612494930057085	0.840091230900038	0.584449517656984	0.295217883027457
ENSMUSG00000037095	102.948039423443	137.495346365283	215.962605512094	123.013075765661	127.832176430861	149.042138544228	101.625644366624	65.3858955886578	93.6229603946764	132.437229370222	78.6938564215945	112.858421632925	142.715563673595	97.4373346291167	0.548189695874775	0.00455944171145688	0.185293362943284	Lrg1	17	56426678	56429001	-	1408	protein_coding	leucine-rich alpha-2-glycoprotein 1 [Source:MGI Symbol;Acc:MGI:1924155]	-	98	131	203	150	150	144	96	71	86	128	69	131	6.56578135421117	8.81657451872775	13.7236941267211	7.75126319802933	8.15680678013048	9.46352786675723	6.5030145368416	4.21482785610173	6.02202215186424	8.42641221034689	4.99379006913239
ENSMUSG00000068740	508.437255928026	417.733953079257	443.627618219424	447.767595787005	394.575317916592	492.667069076755	314.404337259244	234.836667255039	342.921308422361	429.386329598766	425.403020945721	360.113131622616	450.80146833451	351.177465850625	0.361209277187384	0.00461881851110025	0.186271172385994	Celsr2	3	108298167	108323383	-	12028	protein_coding	cadherin, EGF LAG seven-pass G-type receptor 2 [Source:MGI Symbol;Acc:MGI:1858235]	-	484	398	417	546	463	476	297	255	315	415	373	418	3.79590152825125	3.1356017226362	3.30004819410968	3.30280628878318	2.94726469748042	3.66190236931167	2.35509904576671	1.77202934169422	2.58204428503533	3.19808544564629	3.16008858998957
ENSMUSG00000067430	80.8877452612769	60.8758022075299	75.5337191692544	54.9458405086618	53.6895141009617	52.7857574010808	52.9300231076169	34.9952680615352	39.1910066768413	52.7679585771977	38.7766828744089	37.9066454339596	63.1197297747942	42.7612641219266	0.560131505713234	0.00462284565537106	0.186271172385994	Zfp763	17	33235837	33252376	-	3557	protein_coding	zinc finger protein 763 [Source:MGI Symbol;Acc:MGI:1920701]	zf-C2H2	77	58	71	67	63	51	50	38	36	51	34	44	2.0420663804575	1.54516680687126	1.89999356636681	1.37048667425601	1.35608919243687	1.32672080298649	1.34070208800033	0.89294329219063	0.997849830447969	1.32898994939685	0.974044721734672
ENSMUSG00000044167	798.372550630785	1110.45859888908	1118.11181474488	1627.05294879381	738.017765260839	2163.18103859331	402.268175617889	459.54312533437	1292.21458126141	558.719561405623	250.907948010881	437.649451828442	1259.19911948545	566.883807243102	1.15149217300338	0.00471615136906291	0.187249446159886	Foxo1	3	52175757	52260642	+	8665	protein_coding	forkhead box O1 [Source:MGI Symbol;Acc:MGI:1890077]	Fork_head	760	1058	1051	1984	866	2090	380	499	1187	540	220	508	8.27385719174522	11.5703991788198	11.5454747502266	16.6593088734952	7.65210455672471	22.3188054786688	4.18274295272135	4.81344624736755	13.5060609164402	5.77644414650439	2.58724740010947
ENSMUSG00000029169	939.13823718937	862.757058872233	838.317897258767	916.037370868287	881.189802863403	824.906836248263	777.012739219816	765.291256819361	832.808891882878	743.924749353042	780.095620179285	782.255319409893	877.057867216721	780.231429477379	0.169663342863206	0.00477205830049401	0.189054319866499	Dhx15	5	52307545	52347856	-	8496	protein_coding	DEAH (Asp-Glu-Ala-His) box polypeptide 15 [Source:MGI Symbol;Acc:MGI:1099786]	-	894	822	788	1117	1034	797	734	831	765	719	684	908	9.92626831735465	9.16829450966332	8.82854958599673	9.56582758711226	9.31831968032182	8.68034618203187	8.24000931739785	8.17543119442475	8.87755729127799	7.84422012377984	8.20399606542801
ENSMUSG00000001240	355.065686991059	335.866494938096	294.687890280049	282.93007426102	299.127292848215	249.438579091382	242.419505832885	201.683255407268	334.212195827508	198.655844055333	184.759488989831	224.855328596896	302.85266973497	231.097603118287	0.390396486198652	0.00478176255233145	0.189054319866499	Ramp2	11	101136854	101150372	+	3301	protein_coding	receptor (calcitonin) activity modifying protein 2 [Source:MGI Symbol;Acc:MGI:1859650]	-	338	320	277	345	351	241	229	219	307	192	162	261	9.65904459871317	9.18619575182624	7.98751876730479	7.6042686278395	8.14128883206044	6.75561274355203	6.61661864820923	5.54527052871166	9.16936801137157	5.39127009641097	5.00095947916012
ENSMUSG00000024286	2041.10245509949	2276.54508600228	2152.17906872397	2170.77074367803	2069.17682916087	2252.19231577945	1903.3636309499	2077.61380912693	1976.96855903177	1834.46255994846	1975.3298452493	1943.57709315938	2160.32774974068	1951.88591624429	0.146023720341365	0.00481836922930374	0.190104742634488	Ccny	18	9312304	9450154	-	6095	protein_coding	cyclin Y [Source:MGI Symbol;Acc:MGI:1915224]	-	1943	2169	2023	2647	2428	2176	1798	2256	1816	1773	1732	2256	30.0719843047916	33.7222919357221	31.5936512375453	31.5983285848932	30.5004707923618	33.0353117154244	28.1359850171514	30.9378075168023	29.3757312641355	26.9631365608524	28.9572971783242
ENSMUSG00000035963	464.316667603693	1142.99566558621	1059.5997787687	1499.93943716929	539.451784538234	2131.09557821226	51.8714226454646	69.9905361230703	903.570431716063	303.157095355273	100.363179204352	375.620395663781	1139.56648531306	300.762176784667	1.92185517169443	0.00485133595341239	0.190996709766385	Odf3l2	10	79475360	79481572	-	1248	protein_coding	outer dense fiber of sperm tails 3-like 2 [Source:MGI Symbol;Acc:MGI:2686003]	-	442	1089	996	1829	633	2059	49	76	830	293	88	436	33.4095541017004	82.6883900253198	75.9665493759535	106.630881559762	38.834766229093	152.663420693864	3.74479149076669	5.09006296525973	65.5707361318074	21.7614796105353	7.18541625703479
ENSMUSG00000046157	92.4431374414593	96.5616172947025	93.6192575618928	102.510896471384	80.9603784062121	91.0813068881395	57.1644249562263	74.5951766574829	75.1160961306125	79.669270793024	65.0079683482737	67.1981441783829	92.8627656772984	69.7918468440004	0.411028372526576	0.00488809732830208	0.191261957031787	Tmem229b	12	79008569	79054401	-	4732	protein_coding	transmembrane protein 229B [Source:MGI Symbol;Acc:MGI:2444389]	-	88	92	88	125	95	88	54	81	69	77	57	78	1.75428815729678	1.84235930913436	1.77017247321168	1.92198129452404	1.53712943774338	1.72080303841852	1.08841663423046	1.43075222736624	1.43764251336255	1.50827792522481	1.2274787012517
ENSMUSG00000024182	339.308334018083	349.511071294956	290.432469481781	326.394694364887	370.713311649497	408.830866145626	275.236120159608	276.278432064751	269.982490440462	291.77577095627	329.601804432476	286.022870092604	347.531791159138	288.149581357695	0.2715250551324	0.00492421537600319	0.191794479765115	Axin1	17	26357662	26414785	+	3828	protein_coding	axin 1 [Source:MGI Symbol;Acc:MGI:1096327]	-	323	333	273	398	435	395	260	300	248	282	289	332	7.95964298347721	8.24334632548591	6.78841469288462	7.56475770805376	8.70059389880585	9.54813156416119	6.47809877233263	6.55048525474771	6.38743221026391	6.82829954976386	7.69324846898823
ENSMUSG00000026933	960.148041153338	1020.19447837447	919.170892425857	937.359637334335	1031.17955654228	982.229093600504	783.36434199273	905.272329065502	821.922501139311	839.114007962889	968.276581187446	811.546818154316	975.04694990513	854.916096583699	0.190315243199217	0.00493563896573153	0.191794479765115	Camsap1	2	25816850	25873294	-	8368	protein_coding	calmodulin regulated spectrin-associated protein 1 [Source:MGI Symbol;Acc:MGI:3036242]	-	914	972	864	1143	1210	949	740	983	755	811	849	942	10.3035651048096	11.0071740842453	9.8281034185389	9.93821615692266	11.0712146073715	10.4939204802506	8.43443886709538	9.81874529028692	8.89553007625639	8.98327238629357	10.3387935723396
ENSMUSG00000057738	1391.89951261288	1180.78064626674	1342.58526185351	1487.63812959272	1407.85836975855	1279.27835583796	1116.82348757072	1160.36941467196	1211.65528975901	1297.47098148639	1017.31768011685	1199.22841918345	1348.34004598706	1167.14421213139	0.208500827937509	0.00494221703059332	0.191794479765115	Sptan1	2	29855572	29921463	+	13431	protein_coding	spectrin alpha, non-erythrocytic 1 [Source:MGI Symbol;Acc:MGI:98386]	-	1325	1125	1262	1814	1652	1236	1055	1260	1113	1254	892	1392	9.30616020386614	7.93734787964311	8.94393537742226	9.82681574925922	9.41744872781475	8.51536659809769	7.49187041918415	7.84126883565869	8.17021278634732	8.6541530808968	6.76768833972225
ENSMUSG00000042010	8543.63678194759	8920.40418899649	8761.91142363351	9339.15271212897	8124.160919436	9373.09449067036	7096.85749826928	7367.42485506004	7199.17019872088	8723.2678189089	7316.24766586274	8713.35936179698	8843.72675280215	7736.05456643647	0.192920154270382	0.00495867634601371	0.192039698651958	Acacb	5	114284596	114388822	+	9632	protein_coding	acetyl-Coenzyme A carboxylase beta [Source:MGI Symbol;Acc:MGI:2140940]	-	8133	8499	8236	11388	9533	9056	6704	8000	6613	8431	6415	10114	79.6521116403545	83.6146925192197	81.3912111094003	86.02305544104	75.7782705988769	86.9987810977195	66.3840398677806	69.4220862546352	67.6906370073492	81.1330870846948	67.8678407681308
ENSMUSG00000020808	15.757352972976	1.04958279668155	2.12771039913393	4.10043585885536	4.26107254769537	5.17507425500793	1.05860046215234	0	0	0	0	2.58454400686088	5.41187147172502	0.607190744835536	3.05847695929698	0.0050712481542365	0.194508503361286	Pimreg	11	71932858	71938196	+	2529	protein_coding	PICALM interacting mitotic regulator [Source:MGI Symbol;Acc:MGI:1924434]	-	15	1	2	5	5	5	1	0	0	0	0	3	0.559506872123934	0.0374698895027412	0.0752763951187827	0.143848406258407	0.151374508322443	0.182942412959588	0.0377135415343391	0	0	0	0
ENSMUSG00000040423	726.939217153293	554.179716647858	536.18302058175	690.513398631242	826.648074252902	642.744222471984	393.79937192067	390.473517318182	523.635394765574	699.434117611483	505.237368040092	530.693036075434	662.867941623172	507.212134288573	0.387181522687649	0.00509301238239608	0.194508503361286	Rc3h1	1	160733988	160802548	+	11423	protein_coding	RING CCCH (C3H) domains 1 [Source:MGI Symbol;Acc:MGI:2685397]	-	692	528	504	842	970	621	372	424	481	676	443	616	5.71464047789074	4.38010969900065	4.19979417144018	5.36309875790884	6.50164313404593	5.03042468764334	3.10605334089186	3.10248597957159	4.15156127102373	5.48531919777112	3.95191317908176
ENSMUSG00000055116	193.290196468506	89.2145377179317	103.193954357995	110.711768189095	182.373905041362	172.847480117265	113.2702494503	77.3579609781304	119.750298179237	100.362587882121	75.2723844032643	88.7360109022235	141.938640315359	95.7915819658795	0.568908312085727	0.00517164373573922	0.196273725586031	Arntl	7	112806672	112913333	+	7523	protein_coding	aryl hydrocarbon receptor nuclear translocator-like [Source:MGI Symbol;Acc:MGI:1096381]	bHLH	184	85	97	135	214	167	107	84	110	97	66	103	2.30722397843646	1.07067855868095	1.22732143531663	1.30564943832816	2.17798197929432	2.05408606982829	1.35655954802828	0.933280887338666	1.44161129262623	1.19513250411274	0.893998353925902
ENSMUSG00000036617	1824.70147427062	1907.09194157037	1856.42732324435	2137.14716963541	1968.61551703526	1986.19349907204	1841.96480414507	1781.99588681765	1553.48795910702	1659.60403054559	1750.65318271228	1793.67354076145	1946.69615413801	1730.22990068151	0.17034162685221	0.00520188225399688	0.197026492252386	Etl4	2	19914591	20815524	+	16148	protein_coding	enhancer trap locus 4 [Source:MGI Symbol;Acc:MGI:95454]	-	1737	1817	1745	2606	2310	1919	1740	1935	1427	1604	1535	2082	10.1471498301861	10.6627058430623	10.2861851523618	11.7419317095379	10.9527912295594	10.9963729799014	10.277243682202	10.0158168956449	8.71268042401396	9.20706075299483	9.68664724542049
ENSMUSG00000012705	122.907353189213	33.5866494938096	140.428886342839	50.0253174780354	111.640100749619	69.3459950171062	77.2778337371207	39.5999085959477	46.8114801973382	44.4906317415589	53.6030616205064	31.8760427512842	87.989050378437	48.9431597739593	0.848721361501705	0.00523497310921528	0.197242670030798	Retn	8	3705770	3710110	+	1579	protein_coding	resistin [Source:MGI Symbol;Acc:MGI:1888506]	-	117	32	132	61	131	67	73	43	43	43	47	37	6.98983183083669	1.9204326901063	7.95736809047277	2.81081061242281	6.35214987114844	3.92632188462463	4.40947491921791	2.27620028472133	2.68492944579634	2.52418807821031	3.03318970560073
ENSMUSG00000036745	2659.84118183835	3686.1347819456	3154.33066671605	3354.15653254368	3415.67575423261	3464.19470630231	2521.58630084687	2844.74692216006	3213.66254750099	2909.48038272706	2671.02915564311	2724.97089790032	3289.05560392977	2814.24603446307	0.225068897678033	0.00528916257783882	0.198742382736332	Ttll7	3	146558122	146689764	+	8266	protein_coding	tubulin tyrosine ligase-like family, member 7 [Source:MGI Symbol;Acc:MGI:1918142]	-	2532	3512	2965	4090	4008	3347	2382	3089	2952	2812	2342	3163	28.8955719908929	40.2615367941136	34.1434139639648	36.000769742524	37.1247794638812	37.4673984966961	27.4847950470721	31.2353700249751	35.2101199426665	31.5322746782543	28.8718980307082
ENSMUSG00000023805	797.322060432586	836.517488955195	735.123942900772	994.76573935831	656.205172345087	1043.2949698096	554.706642167825	467.831478296312	824.099779288024	855.668661634167	433.386455655158	592.722092240095	843.871562300258	621.402518213597	0.441720991276583	0.00531759650632333	0.199033645933941	Synj2	17	5991555	6094565	+	8342	protein_coding	synaptojanin 2 [Source:MGI Symbol;Acc:MGI:1201671]	-	759	797	691	1213	770	1008	524	508	757	827	380	688	8.58291053798037	9.05355986457549	7.88470608064508	10.579727819841	7.06727694297632	11.1810753601965	5.99110937270918	5.08999873652542	8.94689305823907	9.18905201121142	4.64191577904822
ENSMUSG00000031770	2772.24363304558	2973.46806299883	2992.62467638187	2798.95751725467	3094.39088413638	3086.41428568673	2411.49185278303	2726.8681244791	2901.22313316061	2542.17400439558	2478.28623194384	2731.86301525195	2953.01650991734	2631.98439366902	0.165767311782845	0.00533320931270515	0.199211672512841	Herpud1	8	95113066	95122005	+	2333	protein_coding	homocysteine-inducible, endoplasmic reticulum stress-inducible, ubiquitin-like domain member 1 [Source:MGI Symbol;Acc:MGI:1927406]	-	2639	2833	2813	3413	3631	2982	2278	2961	2665	2457	2173	3171	106.705706794347	115.070255514377	114.771125408797	106.440138028812	119.163453377524	118.273140385911	93.1290402995724	106.083494243279	112.623501833567	97.617077929295	94.9136845318049
ENSMUSG00000026213	399.186275315392	351.610236888319	362.774623052335	365.758878609898	357.930094006411	372.605346360571	312.28713633494	348.110824401587	261.273377845609	305.226427064183	320.477879050262	324.791030195517	368.310909038821	312.027779148683	0.236893366582257	0.00535720945806337	0.199714237631504	Stk11ip	1	75498173	75513979	+	5743	protein_coding	serine/threonine kinase 11 interacting protein [Source:MGI Symbol;Acc:MGI:1918978]	-	380	335	341	446	420	360	295	378	240	295	281	377	6.24177020428977	5.52760794620667	5.65188360700783	5.6504094816183	5.59940711300477	5.80038622514112	4.8992471233504	5.50144950714253	4.12020645063953	4.76122368493395	4.98598937906031
ENSMUSG00000121135	274.177941729783	358.95731646509	409.584251833281	215.682926175792	394.575317916592	336.379826575515	58.2230254183786	84.7253858331904	326.591722307011	155.199878168229	96.9417071860222	215.378667238407	331.559596782675	156.176731025206	1.08586642585501	0.00541968299309452	0.200407314113418	Hmga2-ps1	1	176662183	176663734	-	1552	lncRNA	high mobility group AT-hook 2, pseudogene 1 [Source:NCBI gene (formerly Entrezgene);Acc:15365]	-	261	342	385	263	463	325	55	92	300	150	85	250	15.8639665625418	20.8816893614252	23.6127549140881	12.3295694470922	22.8413014054733	19.3769256149239	3.38000326012815	4.95473302207051	19.057945913356	8.95849236280436	5.58098755671751
ENSMUSG00000015522	994.814217693886	999.202822440835	1044.70580597476	1030.84957491624	1018.39633889919	1105.39586086969	857.466374343394	941.18852523392	802.32699780089	980.863230023205	850.806041891442	991.603383965624	1032.2274367991	904.042425543079	0.189852534644625	0.00542871222622153	0.200407314113418	Arnt	3	95341699	95404551	+	8007	protein_coding	aryl hydrocarbon receptor nuclear translocator [Source:MGI Symbol;Acc:MGI:88071]	bHLH	947	952	982	1257	1195	1068	810	1022	737	948	746	1151	11.1568898628912	11.2667423162128	11.6739897088051	11.4221886504404	11.4269321143802	12.3422588988706	9.6485341198549	10.6685455315716	9.07494938861768	10.9742258685522	9.4940790709116
ENSMUSG00000031548	49.3730393153248	48.2808086473513	69.1505879718526	36.0838355579272	69.029375272665	42.435608891065	39.1682170996365	27.6278432064751	32.6591722307011	34.1439731970103	15.9668694188743	43.0757334476813	52.392209276031	32.1069681000631	0.698691058938459	0.00546173303375733	0.20123404706867	Sfrp1	8	23901518	23939648	+	4372	protein_coding	secreted frizzled-related protein 1 [Source:MGI Symbol;Acc:MGI:892014]	-	47	46	65	44	81	41	37	30	30	33	14	50	1.01409980697266	0.997031593186619	1.41517728860946	0.732244979634512	1.41852317728015	0.867754613786217	0.807175027903181	0.573542030081753	0.676530925378054	0.699631205936853	0.326311010258754
ENSMUSG00000096054	1132.42843365788	909.988284722903	1045.76966117433	1084.15524108136	1122.36650906296	1187.16203409882	871.228180351374	796.602812453366	756.604156677908	1098.81513743106	1027.58209617184	816.715906168038	1080.31169396637	894.591381542264	0.27297300681378	0.0055022858270935	0.201552618108803	Syne1	10	4970917	5501482	-	40491	protein_coding	spectrin repeat containing, nuclear envelope 1 [Source:MGI Symbol;Acc:MGI:1927152]	-	1078	867	983	1322	1317	1147	823	865	695	1062	901	948	2.51144258264855	2.0290457368047	2.31085482205996	2.3755098312374	2.49034113876171	2.62118783257461	1.93859674502242	1.78559003113661	1.69228246441451	2.43109203134702	2.26751481793661
ENSMUSG00000007613	615.587256144263	666.485075892784	669.16492052762	737.258367422193	863.293298163083	830.081910503271	555.765242629978	605.970694328688	619.435633308964	687.018127358025	532.609144186734	640.105399032544	730.311804775536	606.817373474155	0.267609825834007	0.0055402358997035	0.202180768916057	Tgfbr1	4	47353222	47414931	+	6534	protein_coding	transforming growth factor, beta receptor I [Source:MGI Symbol;Acc:MGI:98728]	-	586	635	629	899	1013	802	525	658	569	664	467	743	8.46021658449584	9.20928337936864	9.16324212179734	10.0106998734414	11.8703052114348	11.3576496058949	7.66348514442613	8.41726327482127	8.58577866581662	9.41942375028676	7.28318926395496
ENSMUSG00000015468	482.175000973066	376.800224008676	430.86135582462	437.926549725752	310.206081472223	369.500301807566	291.115127091893	329.692262263937	412.59420918119	319.711749026551	250.907948010881	280.853782078882	401.244918968651	314.145846275556	0.35259250901775	0.00565498921440987	0.204768997595591	Notch4	17	34783242	34807477	+	8061	protein_coding	notch 4 [Source:MGI Symbol;Acc:MGI:107471]	-	459	359	405	534	364	357	275	358	379	309	220	326	5.37139090879589	4.22023630422073	4.78237633782643	4.81987988523236	3.4573554616865	4.09800536826207	3.25379299076969	3.71208791496191	4.6355027291086	3.55307965549796	2.78110640391373
ENSMUSG00000033400	18286.9333702378	21786.1901107189	21135.6112497969	21100.8429296697	22430.2858910684	23821.9018106525	16467.5887892418	19209.6393814622	19418.0551693005	20437.7546230468	17360.5490210074	19296.2055552233	21426.9608936907	18698.298756547	0.196502067435605	0.00569332085951443	0.205763569537184	Agl	3	116533648	116601815	-	14023	protein_coding	amylo-1,6-glucosidase, 4-alpha-glucanotransferase [Source:MGI Symbol;Acc:MGI:1924809]	-	17408	20757	19867	25730	26320	23016	15556	20859	17837	19753	15222	22398	117.10378686492	140.266801213495	134.855605885868	133.500450657774	143.706536152451	151.873549403385	105.804258288639	124.330218769968	125.408632035498	130.565223154874	110.615154177067
ENSMUSG00000035021	59.8779412973088	62.974967800893	55.3204703774821	106.611332330239	63.0638737058915	73.4860544211125	59.2816258805309	59.8603269473628	35.9250894537712	47.5946293049234	22.8098134555346	42.2142187787277	70.2224399888212	44.6142839701418	0.653896872785672	0.00575870773321683	0.20773029914602	Baz1a	12	54939774	55061133	-	7159	protein_coding	bromodomain adjacent to zinc finger domain 1A [Source:MGI Symbol;Acc:MGI:1309478]	-	57	60	52	130	74	71	56	65	33	46	20	49	0.751078773918903	0.794200451619773	0.691398810537846	1.32121917937076	0.791427119276766	0.917696793647455	0.746073838002407	0.758901029513585	0.454473044605132	0.595581027858014	0.284682963871904
ENSMUSG00000005397	1491.69608144173	1108.35943329572	1289.39250187516	1230.13075765661	1497.34089326015	1199.58221231084	1007.78763996903	1349.15967658287	1004.81386563124	1174.34574480626	683.153912993263	889.083138360142	1302.7503133067	1018.0573297238	0.355366879111518	0.00588862392297168	0.211209772449314	Nid1	13	13612136	13686854	+	6943	protein_coding	nidogen 1 [Source:MGI Symbol;Acc:MGI:97342]	-	1420	1056	1212	1500	1757	1159	952	1465	923	1135	599	1032	19.2931959194779	14.4127878702821	16.6162532007451	15.7191107343012	19.3756449122536	15.4464790146159	13.077837290279	17.6365895234194	13.1069332608857	15.1524926467206	8.79151056947297
ENSMUSG00000040181	512.63921672082	471.262675710016	537.246875781317	503.533523467438	386.053172821201	455.406534440697	300.642531251264	311.273700126286	352.719060091572	485.258285739328	293.10610290362	471.248523917634	477.690333156915	369.041367338284	0.370300727754359	0.00599010211373586	0.213797878063086	Fmo1	1	162657130	162694179	-	6304	protein_coding	flavin containing monooxygenase 1 [Source:MGI Symbol;Acc:MGI:1310002]	-	488	449	505	614	453	440	284	338	324	469	257	547	7.30241672213935	6.74934111644071	7.62522776364037	7.08656942666533	5.50191109108497	6.45847079457205	4.29683109413984	4.48151282447594	5.06728531442431	6.89591697226834	4.15432782327294
ENSMUSG00000056708	303.591667279338	263.445281967069	313.837283872254	244.385977187779	188.339406608135	320.854603810491	186.313681338812	133.534575497963	236.234679135405	243.146475796891	131.156427369324	241.224107307015	272.409036787511	195.268324407568	0.477757734264447	0.00600953340040488	0.213925833715917	Ier5	1	154972107	154975382	-	3276	protein_coding	immediate early response 5 [Source:MGI Symbol;Acc:MGI:1337072]	-	289	251	295	298	221	310	176	145	217	235	115	280	8.32179369566163	7.26040872669737	8.5714790843015	6.61844936443211	5.16511447325934	8.75610636973061	5.12406843440185	3.69954451109103	6.53073998421214	6.64904626487995	3.57715527947619
ENSMUSG00000022032	311.995588864925	196.27198297945	217.026460711661	255.047110420803	280.378573638356	200.792881094308	225.481898438448	199.841399193503	131.725327997161	219.34916114443	144.842315442645	165.410816439096	243.585432951584	181.108486442547	0.427753216701283	0.00609159389870211	0.216034841298915	Scara5	14	65903852	66002275	+	6093	protein_coding	scavenger receptor class A, member 5 [Source:MGI Symbol;Acc:MGI:1918395]	-	297	187	204	311	329	194	213	217	121	212	127	192	4.5982043354847	2.90831651949859	3.18696017266551	3.71375363997885	4.13424576658833	2.94621054655213	3.33422245414298	2.9768208815979	1.95794615622351	3.22507685450992	2.12400917422934
ENSMUSG00000029648	1333.07206151377	1262.6481044079	1379.82019383835	1606.55076949953	1237.41546785074	1435.5655983392	1023.66664690131	1252.46222536021	1127.83008103354	1329.54562297449	1004.7722827163	1249.19626998276	1375.84536590825	1164.5788548281	0.240072514971505	0.00613729048375142	0.217248611553803	Flt1	5	147498414	147662821	-	13504	protein_coding	FMS-like tyrosine kinase 1 [Source:MGI Symbol;Acc:MGI:95558]	-	1269	1203	1297	1959	1452	1387	967	1360	1036	1285	881	1450	8.86466214560729	8.44178796760785	9.14229421735248	10.5549428533544	8.23257617012601	9.50401821110552	6.82983467894788	8.41783922665802	7.56386690649673	8.8201522951165	6.64809664948994
ENSMUSG00000037904	3215.55049668531	3715.52310025268	4014.98952316572	3738.77741610432	3408.00582364676	5207.15971538898	1800.67938612113	1825.27950784112	3149.43284211394	3515.7945734376	2247.90711604294	3308.21632878193	3883.33434587396	2641.21829238978	0.556029750258632	0.00615693505563147	0.21753738075289	Ankrd9	12	110941787	110945474	-	3160	protein_coding	ankyrin repeat domain 9 [Source:MGI Symbol;Acc:MGI:1921501]	-	3061	3540	3774	4559	3999	5031	1701	1982	2893	3398	1971	3840	91.3774937649783	106.156702834054	113.682197513589	104.970288099368	96.8937784847013	147.319576842254	51.3408881851659	52.4252747619782	90.2626133358967	99.6716568349196	63.5599266124289
ENSMUSG00000017677	215.350490630672	138.544929161964	172.344542329848	122.19298859389	155.103040736112	178.022554372273	106.918646677386	123.404366322256	91.445682245963	131.402563515767	124.313483332664	149.903552397931	163.593090970793	121.231382415328	0.426194296443721	0.00623719388158749	0.219962714580082	Wsb1	11	79130198	79145497	-	3987	protein_coding	WD repeat and SOCS box-containing 1 [Source:MGI Symbol;Acc:MGI:1926139]	-	205	132	162	149	182	172	101	134	84	127	109	174	4.85032255360409	3.13732086102862	3.86764340699461	2.71909206394276	3.49507679667104	3.99186126553625	2.41613549048776	2.80920032806065	2.07720616406019	2.95252015496729	2.78589091900083
ENSMUSG00000039218	6864.95344522655	6411.90130492758	6589.51910611777	7748.18359889309	7790.09283169668	7886.81316463208	5061.16880955033	4870.78875730157	4555.9545261828	7197.13568358799	7039.10843237799	6382.10066760846	7215.24390858229	5851.04281276819	0.302443315613355	0.00631918961214237	0.221172876373826	Srrm2	17	24009506	24043715	+	12842	protein_coding	serine/arginine repetitive matrix 2 [Source:MGI Symbol;Acc:MGI:1923206]	-	6535	6109	6194	9448	9141	7620	4781	5289	4185	6956	6172	7408	48.0038336094862	45.0784216262896	45.9109397353978	53.5292426156536	54.4995120460257	54.9054599173954	35.5084916686951	34.4242945567452	32.1298981624765	50.206771272925	48.9752991292302
ENSMUSG00000032528	60.9284314955072	55.6278882241221	50.0011943796473	54.1257533368907	46.01958351511	61.0658762090935	23.2892101673514	32.2324837408877	44.6342020486248	32.0746414881006	43.3386455655158	45.6602774545422	54.6281211933952	36.8715767441704	0.563825096270316	0.00634157502660173	0.221172876373826	Vipr1	9	121471782	121502020	+	5800	protein_coding	vasoactive intestinal peptide receptor 1 [Source:MGI Symbol;Acc:MGI:109272]	-	58	53	47	66	54	59	22	35	41	31	38	53	0.943328586400952	0.865922686082573	0.771342944224472	0.827941823524678	0.712848658743541	0.941276564831485	0.361776900670268	0.504387364615574	0.696951272619925	0.49541492478074	0.667635541876211
ENSMUSG00000035247	3236.56030064927	3427.93741396194	3201.14029549699	4174.24370431475	3602.31073182167	3509.73535974638	2641.20815307008	2871.45383725965	2852.23437481456	3417.50131726439	3184.24995839264	3224.64940589342	3525.3213009985	3031.88284111579	0.217846507580455	0.00634630444650062	0.221172876373826	Hectd1	12	51790505	51876319	-	14950	protein_coding	HECT domain E3 ubiquitin protein ligase 1 [Source:MGI Symbol;Acc:MGI:2384768]	-	3081	3266	3009	5090	4227	3391	2495	3118	2620	3303	2792	3743	19.4407717371327	20.7017104283776	19.1583737724249	24.7719656573381	21.648241579279	20.9884238102066	15.9175236533884	17.4324755980007	17.2785244126477	20.4787180494002	19.030844764877
ENSMUSG00000024222	1011.62206086506	1596.41543375264	2111.75257114042	2190.45283580053	1566.37026853282	3072.95909262371	280.52912247037	257.859869927101	1705.89742951695	928.095271446007	168.792619570956	689.211735162901	1924.92871045253	671.731008015715	1.51889250523698	0.00636493915005465	0.221172876373826	Fkbp5	17	28618068	28736501	-	9468	protein_coding	FK506 binding protein 5 [Source:MGI Symbol;Acc:MGI:104670]	-	963	1521	1985	2671	1838	2969	265	280	1567	897	148	800	9.59469189590322	15.2230686723965	19.9562947012026	20.5257728451812	14.8634226823875	29.0165100314908	2.66952364102144	2.47186034201126	16.3176381967847	8.78151766788052	1.59289559609805
ENSMUSG00000029056	642.900001297421	557.328465037903	622.355291746674	720.036536815001	623.821020982603	759.700900635164	531.417432000474	570.975426267153	582.421904780836	549.407568715529	486.989517275665	606.506326943353	654.357036085794	554.619695997168	0.237957757556054	0.00639438809520863	0.221789233968976	Pank4	4	155048580	155065395	+	3487	protein_coding	pantothenate kinase 4 [Source:MGI Symbol;Acc:MGI:2387466]	-	612	531	585	878	732	734	502	620	535	531	427	704	16.5562688522335	14.430248678905	15.9691413685704	18.3200412880616	16.0727690446079	19.4776851151765	13.7308656046035	14.8615425716547	15.1268460479665	14.1149049958808	12.4784249997028
ENSMUSG00000038485	1671.32990533366	1935.43067708078	1804.29841846557	1955.08781750223	1831.40898099947	2000.68370698606	1583.6662913799	1720.29370365652	1664.5291446914	1754.79328915544	1643.44705947127	1677.36906045271	1866.3732510613	1674.01642480121	0.156956477623439	0.00653973068382887	0.225180763073366	Socs7	11	97253261	97289368	+	7381	protein_coding	suppressor of cytokine signaling 7 [Source:MGI Symbol;Acc:MGI:2651588]	-	1591	1844	1696	2384	2149	1933	1496	1868	1529	1696	1441	1947	20.3337729435566	23.6742894484061	21.871989535372	23.5003821898167	22.2921922963145	24.2331503446819	19.3313656177149	21.153674349937	20.4239073819993	21.2983533662419	19.8944813207916
ENSMUSG00000112709	6.3029411891904	2.0991655933631	9.57469679610267	8.20087171771072	0.852214509539075	7.2451039570111	1.05860046215234	0	2.17727814871341	1.03466585445486	2.28098134555346	0	5.71249896048618	1.09192096847901	2.45266479380912	0.00657108917410208	0.225440736918741	Gm19395	10	53156377	53159782	+	646	lncRNA	predicted gene, 19395 [Source:MGI Symbol;Acc:MGI:5011580]	-	6	2	9	10	1	7	1	0	2	1	2	0	0.87615658179655	0.293378794279977	1.32613469759955	1.12629293940406	0.118522022150916	1.0026716831652	0.147643260898364	0	0.305241816899159	0.143483799247393	0.315486894482811
ENSMUSG00000028580	1004.26862947767	847.01331692201	910.660050829321	975.903734407575	997.943190670256	1007.06945002454	865.935178040613	943.030381447684	832.808891882878	744.959415207497	769.831204124294	836.530743553971	957.143062055229	832.18263570949	0.201469021228277	0.00659952862217142	0.226007003701053	Pum1	4	130390632	130508875	+	6008	protein_coding	pumilio RNA-binding family member 1 [Source:MGI Symbol;Acc:MGI:1931749]	-	956	807	856	1190	1171	973	818	1024	765	720	675	971	15.0103550033174	12.7284304087572	13.5619296593395	14.4112256031537	14.9230825579918	14.985669293964	12.9858244124502	14.2460406882481	12.5538826142972	11.1080533798181	11.4487400415471
ENSMUSG00000031431	5557.09314846954	6134.81144660365	5476.72656737073	5856.24249361722	5969.76263932122	7230.61374909707	3239.31741418616	4350.46437691295	6385.95681017642	3848.95697857207	2999.49046940281	4920.97178906311	6037.54167407991	4290.85963971892	0.492645154117413	0.00672728229527765	0.229966195140737	Tsc22d3	X	139440277	139501408	-	4341	protein_coding	TSC22 domain family, member 3 [Source:MGI Symbol;Acc:MGI:1196284]	TSC22	5290	5845	5148	7141	7005	6986	3060	4724	5866	3720	2630	5712	114.955268879545	127.592742220449	112.882442842526	119.688693634271	123.552041073022	148.912797859956	67.2322719220113	90.9587012905192	133.22901746868	79.4307274009202	61.737609305276
ENSMUSG00000039262	4706.19608792884	4643.35429251917	4693.72914048944	4757.32568344399	5314.40968148567	5905.79473981504	3605.59317409086	3737.1262577292	3760.15936282805	4997.43607701696	4437.64920777427	4715.0697831832	5003.46827094703	4208.83897710376	0.249470075034961	0.00675082460233862	0.230355164538899	Prrc2b	2	32041094	32124549	+	11262	protein_coding	proline-rich coiled-coil 2B [Source:MGI Symbol;Acc:MGI:1923304]	-	4480	4424	4412	5801	6236	5706	3406	4058	3454	4830	3891	5473	37.5254134885124	37.2246683399007	37.2904502913706	37.4775525714613	42.3957335522988	46.8823607478351	28.8453137556748	30.1176212510795	30.2380208745349	39.7527331500382	35.2070432052686
ENSMUSG00000060131	12.6058823783808	5.24791398340775	4.25542079826785	1.64017434354214	3.4088580381563	5.17507425500793	0	0	1.0886390743567	2.06933170890971	1.14049067277673	1.72302933790725	5.38888729946046	1.00358179899173	2.4068999477847	0.00687611617341728	0.232951499270441	Atp8b4	2	126162893	126342594	-	6660	protein_coding	ATPase, class I, type 8B, member 4 [Source:MGI Symbol;Acc:MGI:1859664]	-	12	5	4	2	4	5	0	0	1	2	1	2	0.169969114666838	0.0711421550693938	0.0571693703469674	0.0218494065722228	0.0459851209066015	0.0694686730292489	0	0	0.0148037697985628	0.0278349952894342	0.0153006406783706
ENSMUSG00000022812	1710.198042667	1519.79588959488	1613.86833774308	1765.64768082312	1849.30548569979	1709.84453385462	1388.88380634387	1520.45230446301	1445.7126907457	1532.34013044764	1676.5212889818	1426.66829178721	1694.77666173042	1498.4297521282	0.1786825819612	0.00689919334270819	0.233145243069546	Gsk3b	16	37909363	38066446	+	9831	protein_coding	glycogen synthase kinase 3 beta [Source:MGI Symbol;Acc:MGI:1861437]	-	1628	1448	1517	2153	2170	1652	1312	1651	1328	1481	1470	1656	15.621390892694	13.9573223069802	14.6880969859854	15.9341981411337	16.9002686493334	15.5491113954464	12.7286482617161	14.0369749512063	13.3182428957373	13.9634504443862	15.2371409184603
ENSMUSG00000030022	133.412255171197	103.908696871473	126.598768748469	104.151070814926	132.093248978557	130.4118712262	89.9810392829488	65.3858955886578	96.8888776177466	76.5652732296594	110.627595259343	108.550848288157	121.76265196847	91.3332548777521	0.415572769292731	0.00690645693114453	0.233145243069546	Adamts9	6	92749680	92920473	-	15048	protein_coding	a disintegrin-like and metallopeptidase (reprolysin type) with thrombospondin type 1 motif, 9 [Source:MGI Symbol;Acc:MGI:1916320]	-	127	99	119	127	155	126	85	71	89	74	97	126	0.796137230681292	0.623429937844951	0.75274144030412	0.614057185902363	0.788650324160764	0.774791755173107	0.538748767672062	0.394369857880864	0.583119784051046	0.45581469558894	0.656866021467368
ENSMUSG00000090946	251.067157369418	261.346116373706	260.644523893906	237.00519264184	283.787431676512	234.94837117736	212.77869289262	176.818196521441	269.982490440462	205.898505036517	179.057035625947	192.979285845612	254.799798855457	206.2523677271	0.307138120629708	0.00694544091628417	0.233439330467848	Ccdc71l	12	32428703	32432942	+	4240	protein_coding	coiled-coil domain containing 71 like [Source:MGI Symbol;Acc:MGI:1919373]	-	239	249	245	289	333	227	201	192	248	199	157	224	5.31734745636386	5.56499440744238	5.5001923110346	4.95924844408257	6.01325951911808	4.95396836127732	4.52143557891723	3.78494453663007	5.76676662756846	4.35033403972862	3.77326790238628
ENSMUSG00000038612	3322.70049690154	3410.09450641835	3260.71618667274	3731.39663155838	3444.65104755694	3640.14723097258	2871.98305381929	2891.71425561106	3372.60385235707	3344.0400415981	2785.07822292078	3177.26609910097	3468.28435001342	3073.78092090121	0.174344224051256	0.00695215774667345	0.233439330467848	Mcl1	3	95566099	95570487	+	3418	protein_coding	myeloid cell leukemia sequence 1 [Source:MGI Symbol;Acc:MGI:101769]	-	3163	3249	3065	4550	4042	3517	2713	3140	3098	3232	2442	3688	87.2951526853777	90.0759590242403	85.3563955497083	96.8552614625612	90.5431962384331	95.2124055864344	75.7048811480257	76.785945702406	89.3626228927476	87.6465204512149	72.8043697523782
ENSMUSG00000026628	108.200490414435	43.0328946639435	46.8096287809464	46.7449687909511	55.3939431200399	85.9062326331316	47.6370207968552	23.9441307789451	42.4569238999114	49.6639610138331	43.3386455655158	22.3993813927943	64.3480264005746	38.2400105746425	0.755509308700686	0.00696447469185415	0.233439330467848	Atf3	1	190902493	190950236	-	2154	protein_coding	activating transcription factor 3 [Source:MGI Symbol;Acc:MGI:109384]	TF_bZIP	103	41	44	57	65	83	45	26	39	48	38	26	4.51080986069165	1.803721157219	1.94439557642471	1.92536483819574	2.31046411797444	3.56554253269343	1.99256712828016	1.00890853672939	1.78511196261779	2.06552722704882	1.79771872928599
ENSMUSG00000075605	2.1009803963968	2.0991655933631	3.19156559870089	1.64017434354214	1.70442901907815	5.17507425500793	0	0	0	1.03466585445486	0	0	2.65189820101483	0.17244430907581	3.34071469217373	0.00704856063256491	0.235424411392441	Slurp2	15	74614613	74618542	-	545	protein_coding	secreted Ly6/Plaur domain containing 2 [Source:MGI Symbol;Acc:MGI:1916712]	-	2	2	3	2	2	5	0	0	0	1	0	0	0.346175628037047	0.347748075421771	0.5239651465745	0.267003757377989	0.280973307557767	0.848919930962932	0	0	0	0.170074374887735	0
ENSMUSG00000022867	2624.12451509961	3332.42537946392	2956.45359959659	2920.33041867679	2943.54891594796	2953.93238475852	2620.03614382704	2584.12426791231	2863.12076555813	2589.76863370051	2658.48375824256	2511.31525999982	2955.1358689239	2637.80813820673	0.164102835476781	0.00712602870389709	0.237175275209847	Usp25	16	76810594	76913668	+	5411	protein_coding	ubiquitin specific peptidase 25 [Source:MGI Symbol;Acc:MGI:1353655]	-	2498	3175	2779	3561	3454	2854	2475	2806	2630	2503	2331	2915	43.5489707785914	55.6028992799803	48.8864678476031	47.8826655990155	48.8738295459219	48.8056007472805	43.6258413763353	43.3445282448216	47.920878033204	42.876438253092	43.8983892414963
ENSMUSG00000038611	397.085294918995	388.345634772173	408.520396633714	417.424370431475	427.811683788615	457.476564142701	353.572554358881	357.320105470412	414.771487329904	357.994385641381	322.758860395815	335.129206222961	416.110657447946	356.924433236559	0.222459855000133	0.00717986614836981	0.23805199739948	Phrf1	7	140808697	140842663	+	9493	protein_coding	PHD and ring finger domains 1 [Source:MGI Symbol;Acc:MGI:2141847]	-	378	370	384	509	502	442	334	388	381	346	283	389	3.75622253934014	3.69342670435058	3.85039593648342	3.90119969005799	4.04885111212101	4.30836031116951	3.35574639676337	3.41627161466611	3.95701819372814	3.37837615849365	3.03785331694715
ENSMUSG00000026504	190.138725873911	273.941109933884	248.942116698669	223.063710721731	228.393488556472	261.858757303401	168.317473482222	173.134484093911	213.373258573914	184.170522092965	226.95764388257	183.502624487122	237.722984848011	191.576001102117	0.31276601256104	0.00728782290524904	0.24060928171744	Sdccag8	1	176642226	176848003	+	4129	protein_coding	serologically defined colon cancer antigen 8 [Source:MGI Symbol;Acc:MGI:1924066]	-	181	261	234	272	268	253	159	188	196	178	199	213	4.13520160180606	5.99000060406512	5.39446800215112	4.79300520631062	4.96960054515469	5.66981470965483	3.67280937270879	3.80572246740353	4.68012810468684	3.99586222035825	4.91124996770929
ENSMUSG00000028019	23.1107843603648	36.7353978838542	36.1710767852768	19.6820921225057	19.6009337193987	27.9454009770428	10.5860046215234	20.2604183514151	14.1523079666371	20.6933170890971	15.9668694188743	5.16908801372176	27.2076143080738	14.4713342435448	0.910051890340735	0.00740746749097539	0.243124123646606	Pdgfc	3	80943723	81121347	+	5089	protein_coding	platelet-derived growth factor, C polypeptide [Source:MGI Symbol;Acc:MGI:1859631]	-	22	35	34	24	23	27	10	22	13	20	14	6	0.407805637665965	0.651728683304213	0.635951671318889	0.343133144675191	0.346040519771724	0.490935617375498	0.187419034270669	0.361338616764154	0.251858987848216	0.36427798905017	0.280336360159417
ENSMUSG00000020107	538.90147167578	605.609273685254	635.121554141477	633.107296607267	672.39724802633	719.335321446102	509.186822295275	554.398720343268	639.031136647385	505.951602828425	499.534914676209	529.83152140648	634.078694263702	539.655786366174	0.233138588880687	0.00743970853095947	0.243759861867319	Anapc16	10	59823231	59838957	-	4890	protein_coding	anaphase promoting complex subunit 16 [Source:MGI Symbol;Acc:MGI:1289325]	-	513	577	597	772	789	695	481	602	587	489	438	615	9.89626921929833	11.1814517932011	11.6209897692714	11.4866217667909	12.3537757787707	13.1513147996108	9.38171776807878	10.289914824959	11.8352052609197	9.26905343138158	9.12744231289595
ENSMUSG00000042190	153.371568936967	109.156610854881	146.812017540241	152.536213949419	182.373905041362	136.621960332209	110.094448063843	109.590444719018	113.218463733097	152.095880604864	86.6772911310317	80.1208642126873	146.81204610918	108.63289874409	0.43847971538726	0.00766105727787817	0.249287118090132	Cmklr1	5	113750415	113788487	-	3408	protein_coding	chemokine-like receptor 1 [Source:MGI Symbol;Acc:MGI:109603]	-	146	104	138	186	214	132	104	119	104	147	76	93	4.04125509432333	2.89177830324325	3.8544032349245	3.97097577544113	4.80779296661713	3.58399646910055	2.91058240616072	2.91857946896101	3.00870983370791	3.99809523008536	2.27246839371011
ENSMUSG00000026556	37.8176471351424	36.7353978838542	27.6602351887411	20.5021792942768	23.8620062670941	18.6302673180285	7.41020323506637	16.5767059238851	9.79775166921033	25.8666463613714	12.5453974005441	16.3687787101189	27.5346221811895	14.760913883366	0.88666471299112	0.00775392290483386	0.251017893389606	Vangl2	1	171828527	171856011	-	6990	protein_coding	VANGL planar cell polarity 2 [Source:MGI Symbol;Acc:MGI:2135272]	-	36	35	26	25	28	18	7	18	9	25	11	19	0.485834465099203	0.474484587887717	0.354057516784009	0.26022361904686	0.306699046733299	0.238280529978437	0.0955139951047789	0.215238262276174	0.126943914409994	0.331511209992188	0.160361221187043
ENSMUSG00000024006	700.676962198333	720.013798523543	751.081770894276	668.371044993423	680.919393121721	691.389920469059	577.995852335177	593.077700832333	578.067348483409	642.527495616466	700.261273084914	615.121473632889	702.075481700059	617.841857330865	0.184241908164214	0.00775401138625618	0.251017893389606	Stk38	17	29189854	29226969	-	11560	protein_coding	serine/threonine kinase 38 [Source:MGI Symbol;Acc:MGI:2442572]	-	667	686	706	815	799	668	546	644	531	621	614	714	5.44290802015082	5.6233811833018	5.81332380183017	5.129601813727	5.29200828903838	5.34702058938348	4.5048564369401	4.65642037645104	4.52880101572885	4.97930984505879	5.41245604564187
ENSMUSG00000037820	919.178923423601	803.980422258067	967.04437640637	853.710745813686	908.460667168653	927.37330649742	775.954138757664	821.467871339194	907.92498801349	733.578090808494	727.633049231555	690.073249831855	896.6247402613	776.105231330375	0.208506135617653	0.00777036278860862	0.251117970120597	Tgm2	2	157958322	157988356	-	4608	protein_coding	transglutaminase 2, C polypeptide [Source:MGI Symbol;Acc:MGI:98731]	-	875	766	909	1041	1066	896	733	892	834	709	638	801	17.9125979405563	15.7524293670059	18.7771233679644	16.4369842371544	17.7123548710759	17.9923863145755	15.1718189266649	16.1799260266315	17.8443253298458	14.2616295200728	14.1088642130319
ENSMUSG00000070369	4.2019607927936	16.7933247469048	23.4048143904732	1.64017434354214	10.2265741144689	2.07002970200317	2.11720092430468	0.920928106882504	3.26591722307011	2.06933170890971	5.70245336388366	0	9.72281301503097	2.34597188784178	2.08575510635495	0.00780063886307832	0.251273845258521	Itgad	7	127753548	127822988	+	4510	protein_coding	integrin, alpha D [Source:MGI Symbol;Acc:MGI:3578624]	-	4	16	22	2	12	2	2	1	3	2	5	0	0.0836655065544082	0.336182174908852	0.464326837208297	0.0322654207917969	0.20372122299643	0.0410342671729311	0.0422960295079128	0.0185330802329447	0.0655829979102628	0.0411044498065702	0.1129736883791
ENSMUSG00000028532	98.7460786306497	67.1732989876191	62.7674567744509	97.5903734407575	119.31003133547	73.4860544211125	52.9300231076169	63.5440393748928	62.0524272383321	56.9066219950171	65.0079683482737	69.7826881852437	86.5122155983434	61.7039613748961	0.492020544958509	0.00787171763779274	0.252241266708154	Cachd1	4	100633872	100886417	+	6020	protein_coding	cache domain containing 1 [Source:MGI Symbol;Acc:MGI:2444177]	-	94	64	59	119	140	71	50	69	57	55	57	81	1.47297154687192	1.00742964042453	0.932895863128629	1.43824989075992	1.78058665836027	1.0913274660668	0.792172313458002	0.958024790313966	0.933522772579805	0.846840429777387	0.964855351216451
ENSMUSG00000000881	44.1205883243328	46.1816430539882	58.512035976183	36.9039227296982	34.088580381563	47.6106831460729	29.6408129402655	23.0232026720626	23.9500596358475	28.970643924736	27.3717761466416	40.4911894408204	44.569575601973	28.9079474600623	0.611214147919367	0.00792183291760743	0.253066057768165	Dlg3	X	99811328	99862016	+	5844	protein_coding	discs large MAGUK scaffold protein 3 [Source:MGI Symbol;Acc:MGI:1888986]	-	42	44	55	45	40	46	28	25	22	28	24	47	0.67795688961054	0.713466705049116	0.895839337700812	0.560255574067007	0.524060412795972	0.728351220713234	0.456976609022864	0.357564133515489	0.371158170924953	0.444102491578857	0.418489802537774
ENSMUSG00000020265	412.842647891972	477.560172490105	491.501102199937	427.265416492728	376.678813216271	570.293182901873	354.631154821033	273.515647744104	378.846397876133	429.386329598766	386.626338071312	391.9891743739	459.356889198814	369.165840414208	0.314818126918926	0.00792418271499216	0.253066057768165	Sumo3	10	77441931	77454165	+	3660	protein_coding	small ubiquitin-like modifier 3 [Source:MGI Symbol;Acc:MGI:1336201]	-	393	455	462	521	442	551	335	297	348	415	339	455	10.1291840015184	11.7804411205893	12.0154084021852	10.3571559957231	9.24640164721181	13.9304049545636	8.72991204672543	6.78265163377664	9.37442655375222	10.5099922787523	9.4384886571542
ENSMUSG00000007476	82.9887256576737	71.3716301743453	90.4276919631919	88.5694145512757	50.2806560628054	83.8362029311284	48.6956212590076	43.2836210234777	63.1410663126888	56.9066219950171	26.2312854738648	71.505717523151	77.9123868900701	51.6273222645345	0.58623386766232	0.00802370403878675	0.254256077141998	Lrrc8a	2	30127727	30153802	+	4308	protein_coding	leucine rich repeat containing 8A VRAC subunit A [Source:MGI Symbol;Acc:MGI:2652847]	-	79	68	85	108	59	81	46	47	58	55	23	83	1.72987368444	1.49576876452308	1.87810936359205	1.82402984671175	1.04859525354225	1.73981292257932	1.01842319889875	0.911898100505408	1.32739094656194	1.18337497383005	0.544046457547076
ENSMUSG00000038332	741.646079928071	471.262675710016	646.823961336714	683.132614085303	619.559948434907	635.499118514973	516.597025530341	513.877883640438	643.385692944811	506.98626868288	431.105474309605	491.063361303567	632.987399668331	517.16928440194	0.291979446722011	0.00808757192924898	0.254343427732038	Sesn1	10	41685931	41784420	+	3982	protein_coding	sestrin 1 [Source:MGI Symbol;Acc:MGI:2155278]	-	706	449	608	833	727	614	488	558	591	490	378	570	16.7250121044468	10.6850442988554	14.5338264665098	15.2204546450586	13.9786337335511	14.2679094172841	11.6886596463304	11.7127019218041	14.6329799480993	11.4059170803038	9.67329404695739
ENSMUSG00000067158	36.767156936944	31.4874839004465	21.2771039913393	36.0838355579272	34.9407948911021	43.4706237420666	14.8204064701327	22.1022745651801	14.1523079666371	18.6239853801874	17.107360091651	33.5990720891914	34.0044998366376	20.0675677604966	0.746707935950352	0.00809010067199764	0.254343427732038	Col4a4	1	82426144	82564570	-	10612	protein_coding	collagen, type IV, alpha 4 [Source:MGI Symbol;Acc:MGI:104687]	-	35	30	20	44	41	42	14	24	13	18	15	39	0.311124203958098	0.26788923073624	0.179395027568226	0.301674995379013	0.295813633498789	0.366222714280843	0.12582789781048	0.189033226951935	0.120779343117185	0.157221034456152	0.144038258930383
ENSMUSG00000039713	283.632353513568	248.751122813527	247.878261499103	233.724843954755	224.984630518316	242.193475134371	238.185103984276	210.892536476094	207.93006320213	217.27982943552	149.404278133752	160.241728425375	246.86078123894	197.322256609524	0.322178944404436	0.00809167679373186	0.254343427732038	Plekhg5	4	152156955	152199857	+	5430	protein_coding	pleckstrin homology domain containing, family G (with RhoGef domain) member 5 [Source:MGI Symbol;Acc:MGI:2652860]	-	270	237	233	285	264	234	225	229	191	210	131	186	4.69058413127545	4.13599264842109	4.08445145105972	3.81881755200149	3.72250824046146	3.98757859284356	3.95210828205843	3.52500551266722	3.46800799446774	3.58471679666691	2.45841564756007
ENSMUSG00000056679	17.8583333693728	5.24791398340775	8.51084159653571	4.10043585885536	3.4088580381563	4.14005940400634	0	0.920928106882504	1.0886390743567	2.06933170890971	5.70245336388366	0.861514668953626	7.21107370838904	1.77381115383103	2.05429551318198	0.00812235469071678	0.254435231428857	Gpr173	X	151126594	151151700	-	5109	protein_coding	G-protein coupled receptor 173 [Source:MGI Symbol;Acc:MGI:1918021]	-	17	5	8	5	4	4	0	1	1	2	5	1	0.313888940473991	0.0927396266905779	0.149049914468899	0.0712062281126463	0.0599453719393161	0.072446484615353	0	0.0163601863085889	0.0192979265724072	0.0362851964430674	0.0997281923252573
ENSMUSG00000066170	26.26225495496	22.0412387303125	25.5325247896071	14.7615690918793	11.078788624008	48.6456979970745	0	4.60464053441252	8.70911259485362	14.485321962368	0	20.676352054887	24.7203456979736	8.07923785775353	1.59139053874079	0.00814745412907289	0.254435231428857	E230001N04Rik	17	28741690	28744372	+	2683	lncRNA	RIKEN cDNA E230001N04 gene [Source:MGI Symbol;Acc:MGI:2443549]	-	25	21	24	18	13	47	0	5	8	14	0	24	0.878986755871181	0.741702706522953	0.851467774530309	0.488130238516227	0.370983206121278	1.62095296545773	0	0.155766291186323	0.293978701031468	0.483662870068364	0
ENSMUSG00000004655	6864.95344522655	6236.62097788177	6865.05760280562	5829.17961694878	6483.64798857328	6474.01789301491	5049.52420446665	5387.42942526265	5705.55738870348	5771.36613614919	4966.83687994267	6789.59710602353	6458.91292074182	5611.7185234247	0.202518891261297	0.00818607519387232	0.254435231428857	Aqp1	6	55313417	55325540	+	2627	protein_coding	aquaporin 1 [Source:MGI Symbol;Acc:MGI:103201]	-	6535	5942	6453	7108	7608	6255	4770	5850	5241	5578	4355	7881	234.665105143899	214.340291200059	233.818698707101	196.866230596935	221.738957656114	220.323321024314	173.182678719999	186.131527341415	196.698314824904	196.813018805658	168.932003208094
ENSMUSG00000003929	103.998529621642	96.5616172947025	88.299981564058	78.7283684900229	88.6303089920638	61.0658762090935	46.5784203347029	59.8603269473628	65.3183444614022	54.8372902861074	71.8509123849341	75.8132908679191	86.2141136952637	62.3764308804048	0.463777005588621	0.00819532554054298	0.254435231428857	Zfp81	17	33548316	33577852	-	6790	protein_coding	zinc finger protein 81 [Source:MGI Symbol;Acc:MGI:1890752]	zf-C2H2	99	92	83	96	104	59	44	65	60	53	63	88	1.37539808621052	1.28395349791219	1.16355244994097	1.02869194300562	1.17272217027792	0.804035946395083	0.618057738994862	0.800143220955486	0.871220384610561	0.723504907015057	0.945484950785084
ENSMUSG00000044791	580.921079603716	549.981385461132	541.502296579584	610.964942969448	587.175797072422	627.218999706961	426.615986247392	481.64539989955	452.873854932388	582.516876058085	540.592578896171	510.016684020547	582.960750232211	499.043563342356	0.224840083889737	0.00821184193205737	0.254526779884292	Setd2	9	110361665	110447701	+	10754	protein_coding	SET domain containing 2 [Source:MGI Symbol;Acc:MGI:1918177]	-	553	524	509	745	689	606	403	523	416	563	474	592	4.85085278296194	4.61734681880925	4.5053174473219	5.04045939136126	4.90547153870556	5.2142976678283	3.57421901206606	4.06495558283929	3.81390482175063	4.85259166995335	4.49150776632949
ENSMUSG00000003123	681.768138630762	468.113927319971	722.357680505968	504.353610639209	559.052718257633	614.798821494942	454.139598263353	414.417648097127	513.837643096364	573.204883367991	341.006711160243	504.847596006825	591.740816141414	466.909013331984	0.340477474441872	0.00827587843181554	0.255674691258928	Lipe	7	25078952	25098135	-	5886	protein_coding	lipase, hormone sensitive [Source:MGI Symbol;Acc:MGI:96790]	-	649	446	679	615	656	594	429	450	472	554	299	586	10.4012954905576	7.18035377954212	10.9806276087681	7.60219031423441	8.53326341471736	9.33811924059225	6.95157449300159	6.39022873475388	7.90620904471258	8.72418552664865	5.17648280809827
ENSMUSG00000113864	3.1514705945952	5.24791398340775	3.19156559870089	6.56069737416857	5.96550156677352	10.3501485100159	1.05860046215234	0	1.0886390743567	4.13866341781943	1.14049067277673	0.861514668953626	5.7445496046103	1.38131804934314	2.08372176547943	0.00831563994558088	0.256187805264398	Gm48381	12	100406956	100410919	-	3964	TEC	predicted gene, 48381 [Source:MGI Symbol;Acc:MGI:6097859]	-	3	5	3	8	7	10	1	0	1	4	1	1	0.0713921735419489	0.119527435106499	0.0720385986082498	0.146838595127148	0.135206000041988	0.233431565274873	0.0240609350505407	0	0.0248721258472322	0.0935323252409846	0.0257069290913088
ENSMUSG00000107325	0	1.04958279668155	1.06385519956696	7.38078454593965	1.70442901907815	5.17507425500793	0	0	0	0	0	0	2.72895430271237	0	3.88572833589149	0.00835823386062277	0.256187805264398	Gm43425	18	44954836	44958126	+	3291	TEC	predicted gene 43425 [Source:MGI Symbol;Acc:MGI:5663562]	-	0	1	1	9	2	5	0	0	0	0	0	0	0	0.0287940901101284	0.0289234280242178	0.198974996952148	0.0465300676447836	0.140583823267942	0	0	0	0	0
ENSMUSG00000079487	727.989707351492	815.525833021564	768.103454087348	855.350920157228	842.840149934145	890.112771861363	652.09788468584	636.361321855811	602.017408119257	781.172720113417	725.352067886002	795.178039444197	816.653806068857	698.696573684087	0.224995746059686	0.0083626830384924	0.256187805264398	Med12	X	100317636	100341071	+	7704	protein_coding	mediator complex subunit 12 [Source:MGI Symbol;Acc:MGI:1926212]	-	693	777	722	1043	989	860	616	691	553	755	636	923	8.48554920010202	9.55731689761683	8.92069252014538	9.85035571295153	9.82905098910787	10.3294073635079	7.62624203905135	7.49697255565308	7.07710125814005	9.08376861460682	8.41249244026673
ENSMUSG00000026672	1104.06519830652	1293.08600551167	1108.53711794878	1444.17350948886	1083.16464162416	1371.3946775771	1099.88588017628	993.681427326222	1146.33694529761	1076.05248863305	1048.11092828182	988.157325289809	1234.07019174285	1058.70416583413	0.221983392046168	0.00837915935674352	0.256187805264398	Optn	2	5025453	5068862	-	3753	protein_coding	optineurin [Source:MGI Symbol;Acc:MGI:1918898]	-	1051	1232	1042	1761	1271	1325	1039	1079	1053	1040	919	1147	26.4172220705409	31.1073764669856	26.4281523304195	34.1400907440365	25.9297635596492	32.668601393371	26.4048150427436	24.0307335483018	27.6628141545231	25.6856263486193	24.9528865701024
ENSMUSG00000056501	1468.58529708136	1422.1846895035	1319.18044746303	1680.35861495893	1303.03598508525	2133.16560791427	746.313325817399	618.863687825043	1248.66901828714	1477.50284016154	658.063118192175	1202.67447785926	1554.41844033439	992.014411357092	0.647871576247687	0.00838599364354042	0.256187805264398	Cebpb	2	167530835	167532338	+	1504	protein_coding	CCAAT/enhancer binding protein (C/EBP), beta [Source:MGI Symbol;Acc:MGI:88373]	TF_bZIP	1398	1355	1240	2049	1529	2061	705	672	1147	1428	577	1396	87.6843991880672	85.373424201161	78.4786449590086	99.1238134583734	77.8379195659657	126.80120583171	44.708224940786	37.3461282736638	75.1903547650382	88.0067041224262	39.0941542630691
ENSMUSG00000103039	6.3029411891904	24.1404043236756	3.19156559870089	13.1213947483371	0.852214509539075	9.31513365901427	5.29300231076169	0.920928106882504	4.35455629742681	0	2.28098134555346	0.861514668953626	9.48727567140957	2.28516378826302	2.07723522474159	0.00838718128967824	0.256187805264398	Gm37123	3	32508736	32509906	+	1171	TEC	predicted gene, 37123 [Source:MGI Symbol;Acc:MGI:5610351]	-	6	23	3	16	1	9	5	1	4	0	2	1	0.483345133937294	1.86123916541926	0.243860806902735	0.994138669656731	0.065384480195979	0.71117886616109	0.407248277285839	0.0713784729723149	0.336782602419909	0	0.174043154428605
ENSMUSG00000029802	447.508824432519	438.725609012888	390.434858241076	471.550123768366	422.698396731381	406.760836443623	328.166143267225	391.394445425064	348.364503794145	377.653036876023	379.783394034652	396.296747718668	429.613108104975	370.276378519296	0.214156206833121	0.00842582181844457	0.256632068798344	Abcg2	6	58561508	58672661	+	8153	protein_coding	ATP binding cassette subfamily G member 2 (Junior blood group) [Source:MGI Symbol;Acc:MGI:1347061]	-	426	418	367	575	496	393	310	425	320	365	333	460	4.92895839331296	4.85836434820518	4.28475770849579	5.13138123809195	4.65796053593864	4.46034380996677	3.62652268214234	4.3570810176005	3.8697159566659	4.14964369244974	4.16208204141747
ENSMUSG00000038827	50.4235295135232	56.6774710208037	54.2566151779151	36.9039227296982	57.098372139118	53.8207722520824	28.5822124781131	29.4696994202401	29.393255007631	45.5252975960137	39.9171735471856	37.9066454339596	51.5301138055234	35.1323805805239	0.549455104925521	0.00842882811239678	0.256632068798344	Abitram	4	56802345	56809601	+	5574	protein_coding	actin binding transcription modulator [Source:MGI Symbol;Acc:MGI:2677850]	-	48	54	51	45	67	52	27	32	27	44	35	44	0.812338933391562	0.91803245960376	0.870925203267445	0.587393895738714	0.920321163031203	0.863236126425888	0.462001032757315	0.479851836960636	0.477576943878287	0.73167985464799	0.639859946560491
ENSMUSG00000098470	13.6563725765792	4.1983311867262	0	0	1.70442901907815	1.03501485100159	0	0	0	0	0	0	3.43235793889752	0	4.19528436851252	0.00844910661150801	0.256836566627189	C1rb	6	124547253	124558130	+	2429	protein_coding	complement component 1, r subcomponent B [Source:MGI Symbol;Acc:MGI:3779804]	-	13	4	0	0	2	1	0	0	0	0	0	0	0.504869148753083	0.156049980325126	0	0	0.0630425906212363	0.0380948013482748	0	0	0	0	0
ENSMUSG00000045248	168.078431711744	197.321565776131	175.536107928549	232.084669611213	182.373905041362	303.259351343464	132.325057769042	106.827660398371	217.727814871341	181.0665245296	118.61102996878	147.31900839107	209.775671902077	150.646182654701	0.479051810043054	0.00848398118414874	0.257071417064654	Med26	8	73248405	73302114	-	2997	protein_coding	mediator complex subunit 26 [Source:MGI Symbol;Acc:MGI:1917875]	-	160	188	165	283	214	293	125	116	200	175	104	171	5.03612191605446	5.94432229024268	5.24052561513868	6.8704245110434	5.46711993000706	9.04636497669775	3.97804248166264	3.23515724213126	6.5794532438057	5.41236019516775	3.53614806789009
ENSMUSG00000001138	426.499020468551	355.808568075045	319.156559870089	392.001668106572	374.122169687654	432.636207718663	375.80316406408	286.408641240459	287.40071563017	349.717058805742	280.560705503076	322.206486188656	383.370698987762	317.01612857203	0.274170195296995	0.0085125459544773	0.25715102790953	Cnnm3	1	36550948	36567318	+	6420	protein_coding	cyclin M3 [Source:MGI Symbol;Acc:MGI:2151055]	-	406	339	300	478	439	418	355	311	264	338	246	374	5.96559822552627	5.00375355720789	4.44799073026639	5.4172234294813	5.23553494546211	6.02468689945998	5.27399205947382	4.04901614727891	4.05429598296341	4.8799689405093	3.90466630246343
ENSMUSG00000113440	44.1205883243328	22.0412387303125	36.1710767852768	45.92488161918	38.3496529292584	21.7353118710333	21.1720092430468	20.2604183514151	17.4182251897072	28.970643924736	18.2478507644277	20.676352054887	34.723791709899	21.12424992137	0.721995774374031	0.00863438649519914	0.258099684694022	Gm46404	13	23625992	23630105	-	4114	lncRNA	predicted gene, 46404 [Source:MGI Symbol;Acc:MGI:5826041]	-	42	21	34	56	45	21	20	22	16	28	16	24	0.963048143627613	0.48371131784178	0.786669434939676	0.990393130186707	0.837490321810188	0.472332941656332	0.463673050755194	0.44697428797102	0.383444265856795	0.630854390079446	0.396314115383366
ENSMUSG00000108852	4.2019607927936	3.14874839004465	6.38313119740178	4.10043585885536	8.52214509539075	9.31513365901427	0	0.920928106882504	2.17727814871341	1.03466585445486	4.56196269110693	0	5.9452591655834	1.44913913352628	2.10281745999494	0.00863668781819204	0.258099684694022	Gm44911	8	7090157	7091218	+	1062	processed_pseudogene	predicted gene 44911 [Source:MGI Symbol;Acc:MGI:5753487]	-	4	3	6	5	10	9	0	1	2	1	4	0	0.355302669077571	0.267687430939075	0.537779670212999	0.34255425558146	0.72095316675604	0.78417180063525	0	0.0787045121003586	0.18567440086333	0.0872792225177173	0.383812681423533
ENSMUSG00000037685	2269.05882810855	2505.35413567886	2062.81523196034	2668.56365694307	2914.57362262363	2310.15314743554	1910.77383418497	2081.29752155446	1929.06843976008	1863.4332038732	2601.45922460373	1990.09888528288	2455.086437125	2062.68851820988	0.251919568707375	0.00868819355898686	0.258865687872469	Atp8a1	5	67775483	68004777	-	14278	protein_coding	ATPase, aminophospholipid transporter (APLT), class I, type 8A, member 1 [Source:MGI Symbol;Acc:MGI:1330848]	-	2160	2387	1939	3254	3420	2232	1805	2260	1772	1801	2281	2310	14.270834477	15.8422288673944	12.9267121554918	16.5818907916671	18.3396185725214	14.4650533803131	12.0574640359518	13.230163439019	12.2360964668115	11.6918092379312	16.2795259027762
ENSMUSG00000035686	219.552451423466	178.429075435863	197.877067119455	215.682926175792	128.6843909404	185.267658329284	116.446050836757	132.613647391081	157.852665781722	132.437229370222	172.214091589287	155.072640411653	187.58226157071	144.439387563453	0.37666850441564	0.00869355673708365	0.258865687872469	Thrsp	7	97062145	97066937	-	2189	protein_coding	thyroid hormone responsive [Source:MGI Symbol;Acc:MGI:109126]	-	209	170	186	263	151	179	110	144	145	128	151	180	9.00665484503421	7.35926431882756	8.08806866274662	8.74165910547603	5.28156654761682	7.56659514527993	4.79284153469063	5.49845757262843	6.53083622406219	5.42000383379096	7.02934778648248
ENSMUSG00000029055	2.1009803963968	4.1983311867262	10.6385519956696	10.6611332330239	11.078788624008	10.3501485100159	0	0	2.17727814871341	7.242660981184	2.28098134555346	0	8.17132232430673	1.95015341257515	2.10652516647281	0.00880991633215004	0.261532807737163	Plch2	4	155067572	155141241	-	8112	protein_coding	phospholipase C, eta 2 [Source:MGI Symbol;Acc:MGI:2443078]	-	2	4	10	13	13	10	0	0	2	7	2	0	0.0232576081459801	0.0467265042171758	0.117340978337895	0.116600198534458	0.122700683188288	0.1140683832285	0	0	0.0243079652017822	0.0799844354285886	0.0251238330665552
ENSMUSG00000001228	22.0602941621664	3.14874839004465	12.7662623948036	23.7825279813611	12.7832176430861	10.3501485100159	6.35160277291403	12.8929934963551	1.0886390743567	3.10399756336457	3.4214720183302	3.44605867581451	14.1485331802463	5.05079393352251	1.47484382192331	0.00881310880405144	0.261532807737163	Uhrf1	17	56610321	56630486	+	4259	protein_coding	ubiquitin-like, containing PHD and RING finger domains, 1 [Source:MGI Symbol;Acc:MGI:1338889]	-	21	3	12	29	15	10	6	14	1	3	3	4	0.465130319662362	0.0667490142421455	0.268195355607516	0.495420801286583	0.269659167561017	0.217262907900821	0.134366113933332	0.27475432869409	0.0231493559188609	0.0652903505380247	0.0717790093340793
ENSMUSG00000020647	704.878922991127	712.666718946772	684.058893321558	896.355278745781	748.244339375308	824.906836248263	626.691473594184	633.598537535163	542.142259029638	647.700824888741	740.178446632099	690.934764500808	761.851831604801	646.874384363439	0.23698222253158	0.00882455719421518	0.261532807737163	Ncoa1	12	4297362	4527182	-	8576	protein_coding	nuclear receptor coactivator 1 [Source:MGI Symbol;Acc:MGI:1276523]	bHLH	671	679	643	1093	878	797	592	688	498	626	649	802	7.38075421496081	7.50267689191951	7.13680527595751	9.27297884874693	7.83865073457713	8.59937280346814	6.5838978022252	6.70544822681898	5.7252060652399	6.76589021460456	7.71158713033445
ENSMUSG00000098882	1.0504901981984	0	2.12771039913393	4.10043585885536	0.852214509539075	11.3851633610174	0	0	0	1.03466585445486	0	0	3.25266905445737	0.17244430907581	3.64342276306631	0.00886011824434215	0.262176436423987	Mir6392	15	84052471	84052578	+	108	miRNA	microRNA 6392 [Source:MGI Symbol;Acc:MGI:5530813]	-	1	0	2	5	1	11	0	0	0	1	0	0	0.873452394815696	0	1.76272225236483	3.36845017988435	0.708937280643439	9.42458330763477	0	0	0	0.858245688090887	0
ENSMUSG00000074480	12.6058823783808	6.2974967800893	9.57469679610267	7.38078454593965	10.2265741144689	13.4551930630206	2.11720092430468	0.920928106882504	9.79775166921033	3.10399756336457	4.56196269110693	0.861514668953626	9.92343794633365	3.56055927063711	1.51631547406294	0.00901384503680448	0.265480866729398	Mex3a	3	88439702	88448703	+	5778	protein_coding	mex3 RNA binding family member A [Source:MGI Symbol;Acc:MGI:1919890]	-	12	6	9	9	12	13	2	1	9	3	4	1	0.195914555846511	0.0984022331800961	0.148266357675546	0.113331034089567	0.159013969490117	0.208189605776129	0.0330140348010881	0.0144659383611251	0.153571817536493	0.048125926435003	0.0705450099812724
ENSMUSG00000041769	583.022060000112	640.245505975745	680.867327722857	699.534357520724	651.944099797392	655.164400684003	503.893819984513	563.608001412093	592.219656450046	601.140861438272	569.104845715589	603.921782936492	651.796291950139	572.314827989501	0.187918350980577	0.00908517235260293	0.265859380867578	Ppp2r2d	7	138447808	138484786	+	5903	protein_coding	protein phosphatase 2, regulatory subunit B, delta [Source:MGI Symbol;Acc:MGI:1289252]	-	555	610	640	853	765	633	476	612	544	581	499	701	8.86917441051209	9.79238079569437	10.3201221483531	10.5138100752724	9.92247977753023	9.92256962165838	7.69095581114747	8.66568277359909	9.08599866694648	9.12302226602185	8.61413369338574
ENSMUSG00000008305	458.013726414503	438.725609012888	505.331219794308	439.566724069294	453.378119074788	608.588732388932	396.975173307127	293.776066095519	364.694089909495	470.77296377696	428.824492964051	402.327350401344	483.934021792452	392.895022742416	0.300825256504815	0.00908792373407584	0.265859380867578	Tle1	4	72035379	72119156	-	8711	protein_coding	transducin-like enhancer of split 1 [Source:MGI Symbol;Acc:MGI:104636]	-	436	418	475	536	532	588	375	319	335	455	376	467	4.72151605637487	4.5471523970746	5.19042885698058	4.47693362445518	4.67600739256681	6.24600806052993	4.10590976381917	3.06088361845199	3.79160725491603	4.84148698344463	4.39849068547221
ENSMUSG00000013539	606.132844360477	531.088895120864	505.331219794308	682.312526913532	369.008882630419	630.324044259965	394.857972382822	385.868876783769	425.657878073471	580.447544349175	369.518977979661	428.172790469952	554.033068846594	430.754006673142	0.362868085727401	0.00909862802505328	0.265859380867578	Tango2	16	18118689	18165967	-	7910	protein_coding	transport and golgi organization 2 [Source:MGI Symbol;Acc:MGI:101825]	-	577	506	475	832	433	609	373	419	391	561	324	497	6.8811705986517	6.06185124899253	5.71603359964069	7.65298253764067	4.19124437319972	7.12416611090397	4.49757583559395	4.42753178070712	4.8735657119653	6.57387986726304	4.17399930232808
ENSMUSG00000014444	456.963236216304	537.386391900953	640.440830139312	428.905590836271	599.959014715508	648.954311577994	450.963796876896	390.473517318182	581.333265706479	468.70363206805	356.973580579117	339.436779567729	552.10156256439	431.314095352742	0.356660801431659	0.00916008278131907	0.266882534942493	Piezo1	8	123208437	123278068	-	9935	protein_coding	piezo-type mechanosensitive ion channel component 1 [Source:MGI Symbol;Acc:MGI:3603204]	-	435	512	602	523	704	627	426	424	534	453	313	394	4.13032647291811	4.88352405463971	5.76774785907155	3.83016688395748	5.4254574053228	5.83973174049317	4.0896663136574	3.56715625009021	5.29931746979374	4.2263524956375	3.21040861050002
ENSMUSG00000060791	16.8078431711744	7.34707957677084	8.51084159653571	6.56069737416857	13.6354321526252	12.420178212019	1.05860046215234	3.68371242753002	8.70911259485362	3.10399756336457	6.84294403666039	1.72302933790725	10.8803453472156	4.1868994037447	1.40194436831704	0.00918634498874298	0.26723656128543	Gmfg	7	28136872	28147658	+	2817	protein_coding	glia maturation factor, gamma [Source:MGI Symbol;Acc:MGI:1927135]	-	16	7	8	8	16	12	1	4	8	3	6	2	0.535791884359788	0.235473714542786	0.270321623365852	0.20662697589067	0.434875264803643	0.394173684664364	0.033857843997282	0.118685398438879	0.279994623666109	0.0987119641254694	0.21704423198711
ENSMUSG00000022096	1668.17843473906	2334.27213981977	2995.81624198057	3069.58628393912	1627.72971321963	4865.60481455845	1097.76867925197	1143.79270874807	1994.38678422148	2499.75270436293	1118.82134999397	1442.17555582837	2760.19793804277	1549.44963040113	0.833010568212036	0.00922822299411766	0.267632598870751	Hr	14	70789652	70810988	+	6919	protein_coding	lysine demethylase and nuclear receptor corepressor [Source:MGI Symbol;Acc:MGI:96223]	-	1588	2224	2816	3743	1910	4701	1037	1242	1832	2416	981	1674	21.650611290717	30.4594946709944	38.7406556704156	39.3604791015225	21.1359419354139	62.8695205817004	14.2949148377419	15.0038396124326	26.1053001538721	32.3659966616822	14.4480595239929
ENSMUSG00000036904	162.825980720752	129.098683991831	130.854189546737	125.473337280974	153.398611717033	163.53234645825	104.801445753081	97.6183793295455	133.902606145874	135.541226933586	94.6607258404688	108.550848288157	144.197191619263	112.512538715119	0.358081088684947	0.00928868231991158	0.268563459197688	Fzd8	18	9212163	9218136	+	5974	protein_coding	frizzled class receptor 8 [Source:MGI Symbol;Acc:MGI:108460]	-	155	123	123	153	180	158	99	106	123	131	83	126	2.44753818031717	1.95106228957971	1.9598261131917	1.86341716680311	2.3069535881668	2.44728809023161	1.58057869224875	1.48308073923026	2.02995516297066	2.03255105375123	1.41578308573647
ENSMUSG00000042129	75.6352942702849	40.9337290705804	80.8529951670892	74.6279326311675	49.4284415532663	53.8207722520824	46.5784203347029	36.8371242753002	51.166036494765	53.8026244316526	21.6693227827579	32.7375574202378	62.5498608240785	40.4651809565694	0.629182368202114	0.00930541930193167	0.26863724198168	Rassf4	6	116609969	116650913	-	9209	protein_coding	Ras association (RalGDS/AF-6) domain family member 4 [Source:MGI Symbol;Acc:MGI:2386853]	-	72	39	76	91	58	52	44	40	47	52	19	38	0.737535652306098	0.401313136230304	0.785558923195272	0.718973360145584	0.482222079047725	0.522497357877934	0.455707682460106	0.363054367903489	0.503189925328064	0.52339100709289	0.210244659728636
ENSMUSG00000047842	7.35343138738881	3.14874839004465	5.31927599783482	0.820087171771072	4.26107254769537	5.17507425500793	1.05860046215234	0.920928106882504	2.17727814871341	0	0	0	4.34628162495711	0.692801119624708	2.66604661228468	0.00937881175269597	0.269759316811535	Diras2	13	52658416	52685315	-	4786	protein_coding	DIRAS family, GTP-binding RAS-like 2 [Source:MGI Symbol;Acc:MGI:1915453]	-	7	3	5	1	5	5	1	1	2	0	0	0	0.137971168090403	0.0593990914453192	0.0994431692725666	0.0152023660437739	0.0799887445774044	0.0966697372283322	0.0199284468324997	0.0174643108755915	0.0412006296942869	0	0
ENSMUSG00000037369	535.750001081184	452.370185369748	493.628812599071	509.274133669836	593.993513148735	565.118108646865	435.084789944611	479.803543685785	372.314563429992	452.148978396773	445.931853055702	491.924875972521	525.022459085907	446.201434080897	0.233881585035993	0.00943485420508796	0.270723134751448	Kdm6a	X	18028814	18146175	+	8383	protein_coding	lysine (K)-specific demethylase 6A [Source:MGI Symbol;Acc:MGI:1095419]	-	510	431	464	621	697	546	411	521	342	437	391	571	5.73896670719892	4.87201981248938	5.26861132712074	5.38984174315839	6.36597432156931	6.02679479557771	4.67615073697736	5.19472312467525	4.02228826739622	4.83189353395413	4.75292691935079
ENSMUSG00000024395	600.880393369485	515.345153170641	510.650495792143	508.454046498064	493.432201023124	554.76796013685	432.967589020306	431.915282127895	495.3307788323	512.159597955154	356.973580579117	464.356406566005	530.588374998384	448.950539180129	0.239406408379453	0.00946773854740413	0.271005411154555	Lims2	18	32055343	32091672	+	3060	protein_coding	LIM and senescent cell antigen like domains 2 [Source:MGI Symbol;Acc:MGI:2385067]	-	572	491	480	620	579	536	409	469	455	495	313	539	17.6334624647498	15.205170954655	14.9312943729727	14.7419231401998	14.4873418409136	16.2082673354831	12.7481753382355	12.8107797313472	14.660086150518	14.9940570213526	10.4233364527182
ENSMUSG00000038954	130.260784576602	138.544929161964	131.918044746303	108.251506673781	89.4825235016028	110.74658905717	81.5122355857301	88.4090982607204	84.9138477998228	101.397253736576	100.363179204352	89.5975255711771	118.200729619571	91.0321900263965	0.372562153292148	0.00957147909299384	0.27175654005095	Supt3	17	45088039	45430177	+	4121	protein_coding	SPT3, SAGA and STAGA complex component [Source:MGI Symbol;Acc:MGI:1923723]	-	124	132	124	132	105	107	77	96	78	98	88	104	2.83845534369614	3.03530654523686	2.8641563217265	2.33053267480861	1.9508247421734	2.40256082378565	1.78210897442525	1.94712021782474	1.86611558722578	2.20423983565978	2.1760251125405
ENSMUSG00000005102	156.523039531562	137.495346365283	168.08912153158	180.419177789636	192.600479155831	193.547777137296	146.086863777023	122.483438215373	116.484380956167	152.095880604864	151.685259479305	136.119317694673	171.445823585198	137.492523454568	0.322342649191666	0.00958566737533186	0.27175654005095	Eif2ak4	2	118219099	118305715	+	7457	protein_coding	eukaryotic translation initiation factor 2 alpha kinase 4 [Source:MGI Symbol;Acc:MGI:1353427]	-	149	131	158	220	226	187	138	133	107	147	133	158	1.88488613884594	1.66470925605051	2.01683602751465	2.14655696054854	2.32046951132427	2.32044186037514	1.7650665713514	1.49077343651968	1.41470597208688	1.82721047929877	1.81748712620183
ENSMUSG00000022139	5027.64608857755	5162.89777687654	4868.20139321843	4986.95009153989	5152.48892467324	4853.18463634643	4032.20916033826	3970.12106877048	5237.4425867301	4337.31926187476	3905.04006358753	4838.26638084357	5008.56148520535	4386.73308702411	0.191207328938852	0.00972032067127472	0.274496470591286	Mbnl2	14	120513081	120669109	+	11993	protein_coding	muscleblind like splicing factor 2 [Source:MGI Symbol;Acc:MGI:2145597]	-	4786	4919	4576	6081	6046	4689	3809	4311	4811	4192	3424	5616	37.6450480656629	38.8669293227229	36.319162798996	36.8919022552937	38.5986290558814	36.1780893550476	30.2920932854305	30.0451472582218	39.550690994405	32.3987926159856	29.0930844598561
ENSMUSG00000031146	452.761275423511	513.245987577278	486.181826202102	493.692477406185	396.27974693567	508.192291841778	388.506369609908	347.189896294704	495.3307788323	360.06371735029	367.237996634108	420.41915844937	475.058934231087	396.457986195113	0.260480493012943	0.00975479653098493	0.274905262952072	Plp2	X	7534180	7537629	-	1334	protein_coding	proteolipid protein 2 [Source:MGI Symbol;Acc:MGI:1298382]	-	431	489	457	602	465	491	367	377	455	348	322	488	30.4778576265975	34.7363571365364	32.6090402877506	32.8340565060511	26.688778286292	34.0579803487295	26.2395499102744	23.6216194360337	33.6280836736019	24.1801393862128	24.5970989112288
ENSMUSG00000036257	2574.75147578428	3201.22752987872	3110.7126035338	2885.8867574624	2982.75078338676	3308.94247865207	2426.31225925316	2778.44009846452	2905.57768945804	2583.56063857378	2311.77459371844	2776.66177803754	3010.71193811634	2630.38784291758	0.194448524150388	0.00978982786345802	0.27524765315746	Pnpla8	12	44268153	44369315	+	14174	protein_coding	patatin-like phospholipase domain containing 8 [Source:MGI Symbol;Acc:MGI:1914702]	-	2451	3050	2924	3519	3500	3197	2292	3017	2669	2497	2027	3223	16.3122503546545	20.3910060099421	19.6364323944827	18.0638666257289	18.9063279302399	20.8710085439852	15.4229812805466	17.791273233611	18.5653310431174	16.3290718344573	14.5728725160632
ENSMUSG00000041669	128.159804180205	214.114890523036	124.471058349335	258.327459107888	198.565980722604	250.473593942384	66.6918291155973	44.2045491303602	192.689116161136	141.749222060315	100.363179204352	80.1208642126873	195.685464470909	104.303126647408	0.910122999555841	0.00983107084202013	0.275513070649917	Prima1	12	103163167	103208409	-	1253	protein_coding	proline rich membrane anchor 1 [Source:MGI Symbol;Acc:MGI:1926097]	-	122	204	117	315	233	242	63	48	177	137	88	93	9.1848433791633	15.4280251497975	8.88817174017637	18.2912490214949	14.2375879729541	17.871356695084	4.79551909979381	3.20194829116351	13.9273582713023	10.1345596177117	7.1567434068471
ENSMUSG00000029321	69.3323530810945	48.2808086473513	93.6192575618928	74.6279326311675	41.7585109674147	73.4860544211125	15.8790069322851	19.3394902445326	33.7478113050578	47.5946293049234	28.5122668194183	78.39783487478	66.8508195516722	37.2451732468329	0.835128751699441	0.00983455675147026	0.275513070649917	Slc10a6	5	103753577	103777269	-	2124	protein_coding	solute carrier family 10 (sodium/bile acid cotransporter family), member 6 [Source:MGI Symbol;Acc:MGI:1923000]	-	66	46	88	91	49	71	15	21	31	46	25	91	2.93124701988996	2.05227030386624	3.94371758156199	3.11724372579128	1.7663352585523	3.09312210250571	0.673570243928979	0.826397377053765	1.43897660669081	2.0074221179075	1.19941462944854
ENSMUSG00000020312	134.462745369395	152.189505518825	129.79033434717	150.075952434106	193.45269366537	189.40771773329	95.2740415937105	125.246222536021	170.916334674002	120.021239116763	84.3963097854782	108.550848288157	158.229824844693	117.400832665689	0.431867105122151	0.00997460203839702	0.278789714589634	Shc2	10	79453885	79473752	-	5426	protein_coding	SHC (Src homology 2 domain containing) transforming protein 2 [Source:MGI Symbol;Acc:MGI:106180]	-	128	145	122	183	227	183	90	136	157	116	74	126	2.22532360964471	2.5323250700521	2.14021640224465	2.453890503326	3.20315266720504	3.12078987521519	1.58200869676206	2.09499633093973	2.85276774359994	1.98158901223786	1.38974709766461
ENSMUSG00000059201	584.072550198311	201.519896962857	708.527562911598	236.185105470069	590.584655110579	428.496148314656	265.708716000237	167.608915452616	272.159768589176	335.231736843374	71.8509123849341	222.270784590036	458.230986494678	222.471805643395	1.04218939653768	0.0100049355595268	0.279047819773666	Lep	6	29060219	29073876	+	3354	protein_coding	leptin [Source:MGI Symbol;Acc:MGI:104663]	-	556	192	666	288	693	414	251	182	250	324	63	258	15.6377666678273	5.42462114074748	18.9011756362697	6.24760133542772	15.8198276185085	11.4216937402007	7.13767566536261	4.5355763019695	7.3489197121667	8.9540051036602	1.91408551455895
ENSMUSG00000033685	322.500490846909	220.412387303125	332.98667746446	260.787720623201	215.610270913386	251.508608793385	194.78248503603	158.399634383791	259.096099696895	248.319805069166	130.015936696547	206.76352054887	267.301025990744	199.562913571883	0.420355463275126	0.0100678856728799	0.280216252092321	Ucp2	7	100142544	100151227	+	6989	protein_coding	uncoupling protein 2 (mitochondrial, proton carrier) [Source:MGI Symbol;Acc:MGI:109354]	-	307	210	313	318	253	243	184	172	238	240	114	240	4.14368115646147	2.84731486850921	4.26291765767211	3.31051804200739	2.77164147321524	3.21724741900346	2.51101281491246	2.05701545261123	3.35744161286393	3.18296297543508	1.66216317479555
ENSMUSG00000015850	943.340197982164	940.426185826668	900.021498833651	1102.19715886032	576.949222957953	875.622563947341	641.511880064317	601.366053794275	845.872560775158	745.994081061952	476.725101220674	811.546818154316	889.75947140135	687.169415845116	0.372168462213456	0.0100764213578451	0.280216252092321	Adamtsl4	3	95583511	95595228	-	4198	protein_coding	ADAMTS-like 4 [Source:MGI Symbol;Acc:MGI:2389008]	-	898	896	846	1344	677	846	606	653	777	721	418	942	20.1788725723691	20.2253859206716	19.1825162880026	23.2938199385695	12.3474650337127	18.6475232286364	13.7681737025841	13.001542943885	18.248414489995	15.9194557504195	10.1465334853983
ENSMUSG00000023087	638.698040504628	899.492456756088	894.702222835816	852.890658641915	654.500743326009	881.832653053351	390.623570534213	410.733935669597	774.022381867616	578.378212640265	274.858252139192	717.641719238371	803.686129186301	524.376345348209	0.615559981373947	0.0100958654909656	0.280345308897222	Noct	3	51131868	51159065	+	10658	protein_coding	nocturnin [Source:MGI Symbol;Acc:MGI:109382]	-	608	857	841	1040	768	852	369	446	711	559	241	833	5.38134528552992	7.61967324295691	7.51100284939917	7.09972460507807	5.51717900222269	7.39702534703186	3.30214999750298	3.4977059078025	6.57719074651367	4.86151329343432	2.30422652723076
ENSMUSG00000036707	4088.50785138818	4570.93307954815	4363.93402862368	4715.50123768366	4199.71310300856	4845.93953238942	3820.48906790779	3946.17693799153	4299.03570463462	4256.61532522728	3681.50389172329	4039.64228272355	4464.08813877361	4007.24386836801	0.155723675119707	0.0103688648426016	0.286665054582759	Cab39	1	85721162	85779297	+	7077	protein_coding	calcium binding protein 39 [Source:MGI Symbol;Acc:MGI:107438]	-	3892	4355	4102	5750	4928	4682	3609	4285	3949	4114	3228	4689	51.8784069276884	58.3136472595512	55.1726834360363	59.1156580954693	53.3154493787161	61.2174791193671	48.6389099143846	50.6087695463811	55.0154272974331	53.882839927517	46.4802200948334
ENSMUSG00000026749	195.391176864903	227.759466879896	274.474641488277	168.11787021307	247.142207766332	245.298519687376	105.860046215234	142.743856566788	248.209708953328	178.99719282069	101.503669877129	188.671712500844	226.363980483309	160.997697822336	0.48975306406022	0.0104725771796252	0.286996501745994	Nek6	2	38401655	38484618	+	10714	protein_coding	NIMA (never in mitosis gene a)-related expressed kinase 6 [Source:MGI Symbol;Acc:MGI:1891638]	-	186	217	258	205	290	237	100	155	228	173	89	219	1.63766209698131	1.91928440077262	2.29216412357166	1.39215021434832	2.07242072332952	2.04686845030478	0.890214173421164	1.20921688788875	2.09811726374106	1.49668307226901	0.846490736951406
ENSMUSG00000058812	0	0	2.12771039913393	4.10043585885536	8.52214509539075	8.28011880801268	1.05860046215234	0	0	1.03466585445486	0	0	3.83840169356545	0.348877719434533	3.41347485831823	0.0104930270351924	0.286996501745994	0610039K10Rik	2	163486770	163487721	+	952	lncRNA	RIKEN cDNA 0610039K10 gene [Source:MGI Symbol;Acc:MGI:1915636]	-	0	0	2	5	10	8	1	0	0	1	0	0	0	0	0.19997269249517	0.382135104440662	0.804256578881213	0.777582121638316	0.100186498466747	0	0	0.0973640066321594	0
ENSMUSG00000084224	15.757352972976	14.6941591535417	15.9578279935045	6.56069737416857	14.4876466621643	11.3851633610174	9.52740415937105	7.36742485506003	5.44319537178351	3.10399756336457	5.70245336388366	5.16908801372176	13.1404745862287	6.05226055453076	1.11054131456569	0.0105020897512923	0.286996501745994	Gm12337	11	75318579	75318978	+	400	processed_pseudogene	predicted gene 12337 [Source:MGI Symbol;Acc:MGI:3650615]	-	15	14	15	8	17	11	9	8	5	3	5	6	3.53748219900357	3.31664726933514	3.56951256103878	1.45517047771004	3.25402211815339	2.54463749306139	2.14599479715773	1.67168383701162	1.23241383573036	0.695179007353618	1.27377833647435
ENSMUSG00000029314	117.654902198221	71.3716301743453	79.7891399675223	77.9082813182518	96.3002395779154	90.0462920371379	60.3402263426833	67.2277518024228	74.0274570562558	66.2186146851109	52.4625709477297	74.9517761989655	88.8450808788989	65.871399505528	0.427140135095402	0.0105392427048287	0.287596798766638	Gpat3	5	100993579	101046968	+	3502	protein_coding	glycerol-3-phosphate acyltransferase 3 [Source:MGI Symbol;Acc:MGI:3603816]	-	112	68	75	95	113	87	57	73	68	64	46	87	3.01692751790139	1.84002622431908	2.03855657397989	1.97374636468381	2.47055127726229	2.29877433047444	1.55240438400902	1.7423318118482	1.91442925938696	1.69394465907602	1.33852206688338
ENSMUSG00000023868	82.9887256576737	71.3716301743453	92.5554023623258	95.1301119254443	60.5072301772743	71.4160247191094	65.633228653445	56.1766145198328	41.3682848255547	71.3919439573852	63.867477675497	39.6296747718668	78.9948541693621	56.3445374005969	0.491693079316952	0.0106879073260181	0.289859095242571	Pde10a	17	8744204	9205480	+	12849	protein_coding	phosphodiesterase 10A [Source:MGI Symbol;Acc:MGI:1345143]	-	79	68	87	116	71	69	62	61	38	69	56	46	0.579990336412757	0.50149987061759	0.644506898716629	0.656859582124541	0.423078143666736	0.496904568509005	0.460223199120655	0.396811868852473	0.291582073361373	0.497754445299501	0.44412226223092
ENSMUSG00000031722	770.009315279428	219.362804506444	869.169698046209	166.477695869528	700.520326841119	374.675376062574	306.994134024178	120.641582001608	314.616692489087	327.98907586219	175.635563607617	158.518699087467	516.702536100884	234.065957845358	1.14264903171131	0.0107286950103818	0.289859095242571	Hp	8	110301760	110305804	-	1606	protein_coding	haptoglobin [Source:MGI Symbol;Acc:MGI:96211]	-	733	209	817	203	822	362	290	131	289	317	154	184	43.0547854191717	12.3319565787412	48.4232754233073	9.19674990582622	39.1884284099639	20.8572121020768	17.2225955770234	6.81788862542097	17.7418479963175	18.2957032238354	9.77145025240597
ENSMUSG00000046138	476.922549982074	392.543965958899	423.414369427652	514.194656700462	455.934762603405	431.601192867661	345.103750661662	442.966419410485	336.389473976221	400.41568567403	382.064375380205	379.927969008549	449.101916256692	381.144612351859	0.237016183651988	0.0107383729737163	0.289859095242571	9930021J03Rik	19	29691802	29783389	-	8134	protein_coding	RIKEN cDNA 9930021J03 gene [Source:MGI Symbol;Acc:MGI:2444398]	-	454	374	398	627	535	417	326	481	309	387	335	441	5.26519766690475	4.35711152036019	4.65753954362244	5.60850682028642	5.03594739065379	4.74378628252498	3.82260636490681	4.94270915664241	3.74542291852156	4.41003648628555	4.19686002182353
ENSMUSG00000031652	682.818628828961	739.955871660492	663.845644529785	696.25400883364	660.466244892783	708.985172936086	640.453279602165	593.077700832333	593.308295524403	658.047483433289	619.286435317766	612.536929626028	692.054261946958	619.451687389331	0.159837783163061	0.0108051209513851	0.289859095242571	N4bp1	8	87534788	87611886	-	12189	protein_coding	NEDD4 binding protein 1 [Source:MGI Symbol;Acc:MGI:2136825]	-	650	705	624	849	775	685	605	644	545	636	543	711	5.03046665978028	5.4809050897912	4.87297473260196	5.06784697504235	4.86816395027122	5.20014821932458	4.73405658026974	4.41613090095775	4.40833893164686	4.83642463069873	4.53957920554974
ENSMUSG00000019122	76.6857844684833	56.6774710208037	81.9168503666562	22.1423536378189	55.3939431200399	48.6456979970745	32.8166143267225	29.4696994202401	51.166036494765	40.3519683237394	13.6858880733208	30.1530134133769	56.9103501018127	32.9405366753608	0.783539788706917	0.010839231781043	0.289859095242571	Ccl9	11	83463745	83469462	-	3045	protein_coding	chemokine (C-C motif) ligand 9 [Source:MGI Symbol;Acc:MGI:104533]	-	73	54	77	27	65	47	31	32	47	39	12	35	2.26151023997601	1.68049685708747	2.40702762736715	0.645149472876372	1.63439727754251	1.4282485406644	0.971002936863924	0.878388879874741	1.52179836530251	1.18716940500454	0.401585288346593
ENSMUSG00000023845	1386.64706162189	1311.97849585194	1334.07442025697	1598.34989778182	1412.97165681579	1399.34007855414	1046.95585706866	1100.50908772459	1167.02108771039	1485.78016699718	1110.83791528454	1318.978958168	1407.22693514709	1205.01384549223	0.223962700341939	0.0108496652755291	0.289859095242571	Lnpep	17	17741672	17845312	-	14144	protein_coding	leucyl/cystinyl aminopeptidase [Source:MGI Symbol;Acc:MGI:2387123]	-	1320	1250	1254	1949	1658	1352	989	1195	1072	1436	974	1531	8.80368873055187	8.37469514921809	8.43923218616634	10.0259023651614	8.97519409086092	8.84499663363584	6.66914547005088	7.06187141271522	7.47255447908904	9.41060571794679	7.01730825636887
ENSMUSG00000046413	2.1009803963968	10.4958279668155	1.06385519956696	4.92052303062643	3.4088580381563	2.07002970200317	1.05860046215234	0	0	0	2.28098134555346	0	4.01001238892753	0.556596967950967	2.96721546434688	0.0108517318896918	0.289859095242571	Irx3os	8	92527040	92534167	+	3728	lncRNA	iroquois homeobox 3, opposite strand [Source:MGI Symbol;Acc:MGI:2441953]	-	2	10	1	6	4	2	1	0	0	0	2	0	0.050607756781167	0.254188172082705	0.0255329939988468	0.117100628571087	0.0821515303749908	0.049641777078841	0.0255841058316372	0	0	0	0.0546685981319463
ENSMUSG00000021589	514.740197117216	672.782572672873	573.417952566593	459.2488161918	604.220087263204	606.518702686929	427.674586709545	547.95222359509	533.433146434784	422.143668617582	457.33675978347	471.248523917634	571.821388083103	476.631484843017	0.261241533940022	0.0109040853827932	0.290847280252589	Rhobtb3	13	76017656	76092044	-	5781	protein_coding	Rho-related BTB domain containing 3 [Source:MGI Symbol;Acc:MGI:1920546]	-	490	641	539	560	709	586	404	595	490	408	401	547	7.99569291362163	10.5071831351166	8.8748994771373	7.04804936444925	9.39019987085789	9.3796768154863	6.66537429550229	8.6027666755052	8.35679335074035	6.54172945857755	7.06846722610225
ENSMUSG00000026100	1367.73823805432	1526.09338637497	1791.53215607077	1238.33162937432	1645.62621791995	1729.50981602365	1022.60804643916	1064.59289155618	1831.09092306797	1325.40695955667	1023.02013348073	1054.49395479924	1549.80524063633	1220.20215148332	0.345091367686576	0.0110795056678588	0.294282858818948	Mstn	1	53100799	53107238	+	2705	protein_coding	myostatin [Source:MGI Symbol;Acc:MGI:95691]	-	1302	1454	1684	1510	1931	1671	966	1156	1682	1281	897	1224	45.4053168019978	50.9364154170931	59.2587470392045	40.6156639804466	54.657098707441	57.1613409632745	34.0608909271615	35.7202683102667	61.3063237470894	43.8952216103505	33.7916204899813
ENSMUSG00000003316	996.915198090282	1099.96277092226	1063.85519956696	1279.33598796287	1283.43505136585	1212.00239052286	943.213011777734	1034.20226402905	879.620372080216	1145.37510088153	1021.87964280795	963.173399890154	1155.91776640518	997.910631911106	0.212981846715755	0.0111777480510693	0.294478348697927	Glg1	8	111881053	111985848	-	7090	protein_coding	golgi apparatus protein 1 [Source:MGI Symbol;Acc:MGI:104967]	-	949	1048	1000	1560	1506	1171	891	1123	808	1107	896	1118	12.6264996966785	14.0070374300352	13.4255291435403	16.0089276814363	16.2633611878835	15.282833719066	11.9860922380037	13.2390758036957	11.2359986377447	14.4722738343292	12.8779169475996
ENSMUSG00000022708	1808.94412129765	1854.6128017363	1783.02131447423	2124.02577488708	2192.74793304404	1859.92168724985	1569.90448537192	1615.30789947191	1675.41553543497	1932.75581612167	1744.9507293484	1692.01480982492	1937.21227211486	1705.05821259563	0.185084404780394	0.011237092109568	0.294778228898912	Zbtb20	16	42696244	43462965	+	30730	protein_coding	zinc finger and BTB domain containing 20 [Source:MGI Symbol;Acc:MGI:1929213]	ZBTB	1722	1767	1676	2590	2573	1797	1483	1754	1539	1868	1530	1964	5.28607818347686	5.44885474865436	5.19145508389283	6.13226738898309	6.41074934247711	5.41101508745533	4.60282790495702	4.77079962596546	4.93767625952234	5.63442623163709	5.07355901023301
ENSMUSG00000110677	76.6857844684833	35.6858150871727	52.1289047787812	54.9458405086618	78.4037348775949	68.3109801661046	37.0510161753318	32.2324837408877	42.4569238999114	54.8372902861074	50.1815896021762	24.9839253996552	61.0268433144664	40.2905381840116	0.608910185611357	0.0112382448656149	0.294778228898912	Gm45777	12	103335031	103338726	+	301	unitary_pseudogene	predicted gene 45777 [Source:MGI Symbol;Acc:MGI:5804892]	-	73	34	49	67	92	66	35	35	39	53	44	29	22.8780687067341	10.7039399295107	15.4955584045094	16.1954189379689	23.4019960813064	20.2894683832137	11.090412388412	9.71909207564893	12.7745221510921	16.3209246466187	14.8960124398329
ENSMUSG00000052676	19.9593137657696	24.1404043236756	36.1710767852768	33.6235740426139	28.9752933243285	18.6302673180285	8.46880369721871	20.2604183514151	20.6841424127774	19.6586512346423	7.98343470943713	14.6457493722116	26.9166549266155	15.2835332962837	0.814140142554838	0.0112819597314267	0.295107394190276	Zmat1	X	133872121	133909958	-	5391	protein_coding	zinc finger, matrin type 1 [Source:MGI Symbol;Acc:MGI:2442284]	zf-C2H2	19	23	34	41	34	18	8	22	19	19	7	17	0.332466020063404	0.404286971379326	0.600326109319575	0.553348076294858	0.482882154428253	0.308955834640933	0.141535962219022	0.341096683493374	0.347480806957919	0.326677824515396	0.132316057953188
ENSMUSG00000027580	286.783824108163	145.892008738735	235.111999104299	341.156263456766	279.526359128816	242.193475134371	156.672868398546	137.218287925493	169.827695599646	235.903814815707	218.974209173133	206.76352054887	255.110654945192	187.560066076899	0.446446945107691	0.011332627561727	0.295236769956691	Helz2	2	180869408	180883820	-	11529	protein_coding	helicase with zinc finger 2, transcriptional coactivator [Source:MGI Symbol;Acc:MGI:2385169]	-	273	139	221	416	328	234	148	149	156	228	192	240	2.23374710805326	1.14249524909256	1.82464457973128	2.62534009336186	2.1782803564501	1.87809452330129	1.22437998854808	1.08023632454996	1.33407274437634	1.83306807386157	1.69704529865955
ENSMUSG00000031758	21.009803963968	22.0412387303125	26.5963799891741	24.6026151531322	43.4629399864928	31.0504455300476	9.52740415937105	13.8139216032376	10.886390743567	25.8666463613714	18.2478507644277	18.9533227169798	28.1272372255212	16.2159227248258	0.797359509464995	0.0113464170846259	0.295236769956691	Cdyl2	8	117301139	117459730	-	2411	protein_coding	chromodomain protein, Y chromosome-like 2 [Source:MGI Symbol;Acc:MGI:1923046]	-	20	21	25	30	51	30	9	15	10	25	16	22	0.782520602572337	0.825378831024921	0.987007482659693	0.905332109732501	1.61958794764996	1.15137626472368	0.356033977131104	0.52001778422178	0.408930347815962	0.961121259993942	0.676248971666183
ENSMUSG00000002289	142.866666954983	81.8674581411608	219.154171110794	95.9501990972154	193.45269366537	129.376856375198	57.1644249562263	66.3068236955403	86.0024868741795	107.605248863305	22.8098134555346	110.273877626064	143.778007557454	75.027112578475	0.93598266900725	0.0113492643641605	0.295236769956691	Angptl4	17	33992724	34000804	-	3541	protein_coding	angiopoietin-like 4 [Source:MGI Symbol;Acc:MGI:1888999]	-	136	78	206	117	227	125	54	72	79	104	20	128	3.62306376025217	2.0873723081304	5.53756631892301	2.40405176351419	4.90830453890273	3.26645977389719	1.45450085094	1.6995373660666	2.19962028856703	2.72234271918578	0.575556435571578
ENSMUSG00000030790	70.3828432792929	52.4791398340775	45.7457735813794	36.9039227296982	30.6797223434067	71.4160247191094	37.0510161753318	34.0743399546527	28.3046159332743	25.8666463613714	27.3717761466416	43.0757334476813	51.267904414494	32.6240213364922	0.638227900300457	0.0114153347552841	0.296548161310796	Adm	7	110226868	110229027	+	1619	protein_coding	adrenomedullin [Source:MGI Symbol;Acc:MGI:108058]	-	67	50	43	45	36	69	35	37	26	25	24	50	3.90383046873773	2.92653954763535	2.52812913526321	2.02231845265447	1.70250039971692	3.94362371882162	2.0618987825275	1.91020080202069	1.58333587295809	1.43129299434552	1.51059568006841
ENSMUSG00000030787	66.1808824864992	62.974967800893	108.51323035583	87.7493273795047	61.3594446868134	72.451039570111	48.6956212590076	52.4929020923027	68.5842616844723	69.3226122484754	19.3883414372044	37.0451307650059	76.5381487132752	49.2548115810781	0.63522154694387	0.011469915104795	0.297557879800832	Lyve1	7	110449814	110462446	-	2919	protein_coding	lymphatic vessel endothelial hyaluronan receptor 1 [Source:MGI Symbol;Acc:MGI:2136348]	-	63	60	102	107	72	70	46	57	63	67	17	43	2.03596097784378	1.94781809974168	3.32616449675419	2.6670647673	1.88855645573257	2.21899933992709	1.50303773239322	1.63216818618811	2.12790878111716	2.12753196266723	0.593469865572153
ENSMUSG00000004085	6329.20344414537	6931.44478928495	6179.93485428449	6003.85818453602	6238.21020982603	5583.90512115355	5372.39734542312	5823.02841981808	5520.48874606284	5278.86518942868	5700.17238253811	5957.37393581433	6211.09276720507	5608.72100318086	0.14697608086477	0.0116234849539456	0.299762240918083	Map3k20	2	72115981	72272954	+	10175	protein_coding	mitogen-activated protein kinase kinase kinase 20 [Source:MGI Symbol;Acc:MGI:2443258]	-	6025	6604	5809	7321	7320	5395	5075	6323	5071	5102	4998	6915	55.8580317746018	61.504074599338	54.3431245656328	52.3503836231705	55.0818139150346	49.0625660936026	47.5716018370755	51.9413115549113	49.1366727153898	46.4773568618268	50.0547941086883
ENSMUSG00000037470	1177.59951218041	1358.16013890592	1238.32745229595	1535.20318555545	1446.20802268781	1536.99705373735	997.201635347503	1077.48588505253	1268.26452162556	1199.17772531318	1316.12623638435	1248.3347553138	1382.08256089381	1184.43179317282	0.223460485220363	0.0116481006768942	0.299762240918083	Uggt1	1	36179108	36283801	-	12853	protein_coding	UDP-glucose glycoprotein glucosyltransferase 1 [Source:MGI Symbol;Acc:MGI:2443162]	-	1121	1294	1164	1872	1697	1485	942	1170	1165	1159	1154	1449	8.22742819073732	9.54027757059424	8.62037422349986	10.5970556845608	10.1090164978765	10.6909223236065	6.99024732288209	7.60861312263126	8.93651050261178	8.35822992839901	9.14924266889535
ENSMUSG00000022570	293.086765297354	349.511071294956	297.87945587875	309.992950929465	308.501652453145	300.15430679046	279.470522008217	250.492445072041	261.273377845609	255.56246605035	260.031873393095	292.053472775279	309.854367107355	266.480692857432	0.216462912024094	0.0116625378759434	0.299762240918083	Gfus	15	75796525	75801681	-	2906	protein_coding	GDP-L-fucose synthase [Source:MGI Symbol;Acc:MGI:98857]	-	279	333	280	378	362	290	264	272	240	247	228	339	9.05673350329889	10.8587507687406	9.171493618636	9.46411632096344	9.53771917551132	9.23412216715013	8.66471861206148	7.82343433701238	8.14258281005604	7.87837645406486	7.99508494745084
ENSMUSG00000027660	317.248039855917	308.577342224375	225.537302308196	242.745802844237	256.516567371261	213.213059306327	219.130295665534	240.362235896334	182.891364491926	188.309185510784	228.098134555346	204.178976542009	260.639685651719	210.495032110322	0.306939277506931	0.0116656865327187	0.299762240918083	Skil	3	31149207	31176726	+	9694	protein_coding	SKI-like [Source:MGI Symbol;Acc:MGI:106203]	-	302	294	212	296	301	206	207	261	168	182	200	237	2.93877896733121	2.8739258368491	2.08166333248118	2.22163431711457	2.37736054457984	1.96633465337752	2.03663628366527	2.25040995182604	1.7086488500326	1.74021840778982	2.1023781084784
ENSMUSG00000005483	137.614215963991	81.8674581411608	91.4915471627589	93.4899375819022	116.753387806853	95.2213662921458	99.5084434423198	83.8044577263079	83.8252087254661	61.0452854128366	62.7269870027203	62.0290561646611	102.739652158135	75.4899064123853	0.446022424656686	0.0117523074043581	0.301170768097069	Dnajb1	8	84334822	84339282	+	3204	protein_coding	DnaJ heat shock protein family (Hsp40) member B1 [Source:MGI Symbol;Acc:MGI:1931874]	-	131	78	86	114	137	92	94	91	77	59	55	72	3.85693023778167	2.30692426438506	2.5549569725288	2.58878643038303	3.27385643083656	2.65698160664678	2.79821765755065	2.37395800824059	2.36943484023065	1.70684816620322	1.74925863935304
ENSMUSG00000022148	11.5553921801824	7.34707957677084	10.6385519956696	13.1213947483371	2.55664352861722	18.6302673180285	3.17580138645702	4.60464053441252	3.26591722307011	0	4.56196269110693	6.89211735162901	10.6415548912676	3.75007319777926	1.48175618185295	0.0118572011938133	0.301600003920764	Fyb	15	6552334	6692794	+	5384	protein_coding	FYN binding protein [Source:MGI Symbol;Acc:MGI:1346327]	-	11	7	10	16	3	18	3	5	3	0	4	8	0.192730580431101	0.12320383615658	0.176796065430351	0.21622146771323	0.0426626446746795	0.309357523133223	0.0531449925001914	0.0776227636056657	0.0549367237324081	0	0.0757074791366627
ENSMUSG00000030278	550.456863855962	188.924903402679	594.695056557933	213.222664660479	564.166005314867	435.741252271667	230.77490074921	128.929934963551	241.677874507188	333.162405134464	118.61102996878	287.745899430511	424.534457677264	223.483674125617	0.92529791054785	0.0118575407404004	0.301600003920764	Cidec	6	113401595	113412721	-	1856	protein_coding	cell death-inducing DFFA-like effector c [Source:MGI Symbol;Acc:MGI:95585]	-	524	180	559	260	662	421	218	140	222	322	104	334	26.6327682798545	9.19021718719712	28.6689299083431	10.1924656305121	27.3093641254759	20.989270857736	11.2027506173464	6.30484205769467	11.792925497075	16.0810086471167	5.71004081867812
ENSMUSG00000037708	19.9593137657696	25.1899871203572	20.2132487917723	16.4017434354214	21.3053627384769	18.6302673180285	7.41020323506637	11.0511372825901	9.79775166921033	15.5199878168229	9.12392538221386	15.5072640411653	20.2833205283043	11.4017115711781	0.815845402974256	0.0118593340705748	0.301600003920764	Spag6	2	18698843	18755224	+	3392	protein_coding	sperm associated antigen 6 [Source:MGI Symbol;Acc:MGI:3040687]	-	19	24	19	20	25	18	7	12	9	15	8	18	0.528397498278835	0.670481253908721	0.533181907702334	0.429000730456969	0.564307387304625	0.491032106294007	0.196828663261322	0.295698791924225	0.261597276452198	0.409893282637747	0.240335535183839
ENSMUSG00000027947	127.109313982006	81.8674581411608	159.578279935045	183.69952647672	117.605602316392	245.298519687376	41.2854180239412	70.9114642299528	126.282132625378	138.645224496951	53.6030616205064	63.7520855025684	152.526450089783	82.4132310832162	0.888768308004502	0.0118748377034853	0.301600003920764	Il6ra	3	89771366	89820503	-	8642	protein_coding	interleukin 6 receptor, alpha [Source:MGI Symbol;Acc:MGI:105304]	-	121	78	150	224	138	237	39	77	116	134	47	74	1.32079100849937	0.855286431739151	1.65216966491034	1.88589555083921	1.22263379202844	2.53762422779049	0.430424012389886	0.744733021580042	1.32339740749568	1.43722883569212	0.554201173934686
ENSMUSG00000007850	2034.7995139103	2014.14938683189	1839.40564005128	1840.27561345428	2298.42253222688	2300.83801377652	1659.88552465487	1698.19142909134	1987.85494977534	1966.89978931868	1544.2243709397	1816.07292215424	2054.64845004186	1778.85483098903	0.207870740849171	0.011964521356951	0.302112140610583	Hnrnph1	11	50267817	50277355	+	5842	protein_coding	heterogeneous nuclear ribonucleoprotein H1 [Source:MGI Symbol;Acc:MGI:1891925]	-	1937	1919	1729	2244	2697	2223	1568	1844	1826	1901	1354	2108	31.277430192719	31.1275302482229	28.1715723749221	27.9476425195252	35.3468701397977	35.2104145347202	25.5994510399279	26.3829595639286	30.8166746188789	30.1617092999938	23.6178824729376
ENSMUSG00000021149	710.131373982119	708.468387760046	789.380558078687	748.739587826988	668.136175478634	750.385766976149	653.156485147993	667.672877489816	706.5267592575	581.48221020363	631.83183271831	635.797825687776	729.206975017104	646.077998417504	0.174181209206849	0.0120110320303405	0.302882722490797	Gtpbp4	13	9016367	9046119	-	9566	protein_coding	GTP binding protein 4 [Source:MGI Symbol;Acc:MGI:1916487]	-	676	675	742	913	784	725	617	725	649	562	554	738	6.66621497393941	6.6865891305553	7.3833112280738	6.94423294035786	6.2750509540708	7.01295186539261	6.15178195853982	6.33478351365995	6.68899501893373	5.44554466698353	5.90151117212452
ENSMUSG00000036879	10259.0872756056	11204.2963545755	10405.5677069645	10900.5986871811	12249.7313601147	11329.2725590634	9854.51170217612	10392.6736861691	10037.2522655688	9735.17102456575	10160.6314037679	10452.7574784143	11058.0923239174	10105.4995934437	0.130011416431478	0.0121554060641321	0.304093897017877	Phkb	8	86567588	86788005	+	7417	protein_coding	phosphorylase kinase beta [Source:MGI Symbol;Acc:MGI:97578]	-	9766	10675	9781	13292	14374	10946	9309	11285	9220	9409	8909	12133	124.208534108018	136.386331016208	125.525692722198	130.390494739934	148.381901438942	136.559020427519	119.70737235325	127.173736690549	122.560124745141	117.584634941175	122.40087582203
ENSMUSG00000037266	9783.21521582171	9939.54908457427	9239.58240823908	8892.20520351373	10258.9582658314	10215.5965793856	7396.44142905839	7299.27617515073	11240.198442733	7179.54636406225	7485.04028543369	8566.90186807486	9721.5177928943	8194.56742741881	0.246528411650065	0.0123363347144224	0.305792548195983	Rsrp1	4	134650903	134654982	+	3349	protein_coding	arginine/serine rich protein 1 [Source:MGI Symbol;Acc:MGI:106498]	-	9313	9470	8685	10843	12038	9870	6987	7926	10325	6939	6563	9944	262.323652587401	267.95759621724	246.849539903428	235.569027915945	275.214151780728	272.706339005032	198.985642782138	197.81675264488	303.963519950216	192.051244432239	199.696798382351
ENSMUSG00000039844	5483.55883459565	5945.88654320098	5702.26386967893	6147.37343959595	5920.33419776795	6160.40839316144	5511.07400596507	5501.62451051608	5095.91950706373	5580.9876189295	5596.38773131543	5288.83855270631	5893.30421300015	5429.13865441602	0.118550203888283	0.0123635004453542	0.306065322136103	Rapgef1	2	29509732	29630990	+	7485	protein_coding	Rap guanine nucleotide exchange factor (GEF) 1 [Source:MGI Symbol;Acc:MGI:104580]	-	5220	5665	5360	7496	6947	5952	5206	5974	4681	5394	4907	6139	65.7872441017097	71.7198464768912	68.1633037708051	72.8654502399096	71.0619408379475	73.5807729820921	66.3374091234507	66.7110169826813	61.6585615503412	66.7966255295554	66.804866234652
ENSMUSG00000020392	533.649020684788	551.030968257813	695.761300516794	494.512564577956	584.619153543805	769.016034294178	466.842803809181	450.333844265545	567.180957739842	562.858224823442	428.824492964051	498.81699332415	604.764840312556	495.809552821035	0.285629229710469	0.0124824313176924	0.307602727835816	Cdkn2aipnl	11	51858488	51868161	+	1958	protein_coding	CDKN2A interacting protein N-terminal like [Source:MGI Symbol;Acc:MGI:1261797]	-	508	525	654	603	686	743	441	489	521	544	376	579	24.4745108218429	25.4084315832621	31.793819746944	22.4072471414493	26.8252018632845	35.1131146317135	21.481868245297	20.8747036848488	26.2344273101334	25.7526305754422	19.5685660680023
ENSMUSG00000034641	17.8583333693728	8.39666237345239	18.0855383926384	2.46026151531322	10.2265741144689	5.17507425500793	6.35160277291403	1.84185621376501	6.53183444614022	4.13866341781943	1.14049067277673	0.861514668953626	10.3670740033756	3.47766036539484	1.58592768982962	0.012502674199492	0.307602727835816	Cd300ld	11	114873100	114880748	-	2645	protein_coding	CD300 molecule like family member d [Source:MGI Symbol;Acc:MGI:2442358]	-	17	8	17	3	12	5	6	2	6	4	1	1	0.606298146269043	0.286612780498851	0.611787912162916	0.0825238456168265	0.347365866054404	0.174919229631304	0.216357383456356	0.0632016573539363	0.223651660170348	0.140174721079495	0.0385263769065966
ENSMUSG00000019948	92.4431374414593	98.6607828880656	91.4915471627589	100.870722127842	103.970170163767	114.886648461176	81.5122355857301	99.4602355433105	78.3820133536826	80.7039366474789	44.4791362382926	62.0290561646611	100.387168040845	74.4277689221926	0.42910159231814	0.0125240729776367	0.307602727835816	Actr6	10	89547833	89568157	-	1983	protein_coding	ARP6 actin-related protein 6 [Source:MGI Symbol;Acc:MGI:1914269]	-	88	94	86	123	122	111	77	108	72	78	39	72	4.18622872432092	4.49196517999428	4.12813017649131	4.51300980227773	4.7105182096611	5.17956744564827	3.70351542289786	4.55224040335992	3.57977997670542	3.64592116816825	2.00412930398385
ENSMUSG00000010608	1256.38627704529	1216.46646135392	1275.56238428079	1311.31938766194	1172.64716512577	1290.66351919898	1014.13924274194	1120.76950607601	1102.79138232334	1206.42038629436	1109.69742461176	1211.2896245488	1253.84086577778	1127.51792776604	0.152438382477497	0.0125786024144631	0.307602727835816	Rbm25	12	83678010	83729897	+	17376	protein_coding	RNA binding motif protein 25 [Source:MGI Symbol;Acc:MGI:1914289]	-	1196	1159	1199	1599	1376	1247	958	1217	1013	1166	973	1406	6.49298451505259	6.32069551624478	6.56820988441605	6.69549261584471	6.06317630075162	6.64063902948173	5.25849963084997	5.85416444993997	5.74786010863191	6.21991039421669	5.70619853310102
ENSMUSG00000020387	260.521569153203	270.79236154384	252.13368229737	283.750161432791	252.255494823566	370.535316658567	159.848669785003	160.241490597556	326.591722307011	237.973146524617	133.437408714878	220.547755252128	281.664764318223	206.440032196866	0.448078025571474	0.0125829504439824	0.307602727835816	Jade2	11	51704282	51748480	-	10760	protein_coding	jade family PHD finger 2 [Source:MGI Symbol;Acc:MGI:1924151]	-	248	258	237	346	296	358	151	174	300	230	117	256	2.17421458575684	2.27215877718658	2.09659102098189	2.33963283126243	2.10625529624623	3.07867598011483	1.33847672189515	1.35164027713765	2.74887844400823	1.98130324276744	1.10804509566914
ENSMUSG00000022983	420.19607927936	446.072688589658	450.010749416826	478.110821142535	413.324037126451	473.001786907724	388.506369609908	316.799268767582	347.275864719788	422.143668617582	417.419586236284	407.496438415065	446.786027077092	383.273532727701	0.222031711235371	0.0125846263388921	0.307602727835816	Scaf4	16	90022568	90081391	-	5546	protein_coding	SR-related CTD-associated factor 4 [Source:MGI Symbol;Acc:MGI:2146350]	-	400	425	423	583	485	457	367	344	319	408	366	473	6.80366813127264	7.26173349887916	7.26002554787548	7.64843480440816	6.69566079338322	7.62481942319808	6.31149649843239	5.18445041410022	5.67097026466619	6.81892138478847	6.72488815217615
ENSMUSG00000028800	178.583333693728	140.644094755328	168.08912153158	181.239264961407	169.590687398276	203.897925647312	125.973454996128	174.055412200793	133.902606145874	130.367897661312	144.842315442645	130.950229680951	173.674071331272	140.015319354617	0.310018872295463	0.0126233946681448	0.307602727835816	Hdac1	4	129409897	129436506	-	3445	protein_coding	histone deacetylase 1 [Source:MGI Symbol;Acc:MGI:108086]	-	170	134	158	221	199	197	119	189	123	126	127	152	4.65503221155767	3.68592771379564	4.36561574954332	4.66752794737183	4.42278085213028	5.2913955522691	3.29460900966644	4.58560588091721	3.52016027390035	3.39013274993927	3.75662928841201
ENSMUSG00000007946	0	1.04958279668155	3.19156559870089	0.820087171771072	2.55664352861722	7.2451039570111	0	0	0	0	0	0	2.47716384213031	0	3.72806247909809	0.0126338787691122	0.307602727835816	Phox2a	7	101467520	101471933	+	2035	protein_coding	paired-like homeobox 2a [Source:MGI Symbol;Acc:MGI:106633]	Homeobox	0	1	3	1	3	7	0	0	0	0	0	0	0	0.0465657742272396	0.140324818124375	0.0357535743909101	0.112872569498022	0.318292829152195	0	0	0	0	0
ENSMUSG00000045348	1.0504901981984	2.0991655933631	5.31927599783482	6.56069737416857	8.52214509539075	9.31513365901427	2.11720092430468	0	3.26591722307011	1.03466585445486	1.14049067277673	0	5.47781798632832	1.25971244576773	2.18526091543919	0.0126670043984691	0.307602727835816	Nyap1	5	137728161	137739869	-	5244	protein_coding	neuronal tyrosine-phosphorylated phosphoinositide 3-kinase adaptor 1 [Source:MGI Symbol;Acc:MGI:2443880]	-	1	2	5	8	10	9	2	0	3	1	1	0	0.0179887220900258	0.0361408659620261	0.090758010705283	0.110996985332574	0.1460053896062	0.158808247954736	0.0363758758735101	0	0.0564033792096273	0.0176755404869977	0.0194321637906079
ENSMUSG00000058935	4.2019607927936	11.545410763497	7.44698639696875	4.10043585885536	7.66993058585167	15.5252227650238	1.05860046215234	5.52556864129503	2.17727814871341	4.13866341781943	3.4214720183302	0	8.4149911938317	2.72026378138507	1.6296130776738	0.0126692431994897	0.307602727835816	Tex48	4	63525326	63540665	-	689	protein_coding	testis expressed 48 [Source:MGI Symbol;Acc:MGI:1922774]	-	4	11	7	5	9	15	1	6	2	4	3	0	0.54765084841855	1.51288077805045	0.967066779962127	0.528000899023962	1.00012632334604	2.01449069248823	0.138428949985985	0.727873949351937	0.28619189218702	0.53811630951417	0.443696372647088
ENSMUSG00000024811	3029.61373160419	4092.32332426136	3341.56918183983	3791.26299509766	3703.72425845682	3645.32230522758	3130.28156658446	3273.8994199673	3348.65379272122	3139.17620241604	3028.00273622222	3247.04878728622	3600.63596608124	3194.51041753291	0.172744353235824	0.0127059934849764	0.307816793063618	Tnks2	19	36811632	36870877	+	10406	protein_coding	tankyrase, TRF1-interacting ankyrin-related ADP-ribose polymerase 2 [Source:MGI Symbol;Acc:MGI:1921743]	-	2884	3899	3141	4623	4346	3522	2957	3555	3076	3034	2655	3769	26.1441441781698	35.505910609642	28.73172901332	32.3239146571858	31.9769818893955	31.3183416929471	27.1027681260615	28.5548531644066	29.1439935322435	27.0250894780047	25.9994732526573
ENSMUSG00000029392	3451.91079127994	3795.29139280048	3158.58608751431	3686.29183711097	3396.07482051321	4263.22617127553	2545.93411147637	2513.21280368235	3513.03829294908	3638.91981011773	2998.34997873003	3123.85218962585	3625.23018341574	3055.55119776357	0.246722481787327	0.0128243372440305	0.309202997093101	Rilpl1	5	124631143	124669454	-	2463	protein_coding	Rab interacting lysosomal protein-like 1 [Source:MGI Symbol;Acc:MGI:1922945]	-	3286	3616	2969	4495	3985	4119	2405	2729	3227	3517	2629	3626	125.853744819875	139.121820380672	114.742268709965	132.785044606306	123.878370622543	154.74641913291	93.1315466624142	92.6111488267296	129.175783935099	132.355911157812	108.770223194188
ENSMUSG00000060240	3.1514705945952	7.34707957677084	14.8939727939375	7.38078454593965	3.4088580381563	4.14005940400634	3.17580138645702	3.68371242753002	1.0886390743567	0	0	2.58454400686088	6.72037082556764	1.7554494825341	1.89114645907298	0.01284311115503	0.309202997093101	Cend1	7	141006359	141009404	-	1775	protein_coding	cell cycle exit and neuronal differentiation 1 [Source:MGI Symbol;Acc:MGI:1929898]	-	3	7	14	9	4	4	3	4	1	0	0	3	0.159435817419879	0.373706734572974	0.750770717063556	0.368916459137757	0.172541355063643	0.208523430929486	0.16120148711044	0.188358742198492	0.0555454123146076	0	0
ENSMUSG00000087090	1867.77157239676	2027.79396318875	1951.11043600581	2530.78901208553	1792.20711356067	2488.17570180781	1196.21852223214	1031.4394797084	1890.96607215759	2066.22771134635	1931.99119968378	1706.66055919713	2109.64129984089	1637.2505907209	0.366057008991963	0.0128476089518294	0.309202997093101	Nctc1	7	142098346	142112337	-	3442	lncRNA	non-coding transcript 1 [Source:MGI Symbol;Acc:MGI:1306816]	-	1778	1932	1834	3086	2103	2404	1130	1120	1737	1997	1694	1981	48.7285946142037	53.189694731929	50.7184662943647	65.2332378589945	46.7799741222721	64.6274209848352	31.312210223878	27.1976452273825	49.7548595621994	53.7777446323911	50.151783892796
ENSMUSG00000062284	4.2019607927936	4.1983311867262	6.38313119740178	0.820087171771072	0.852214509539075	7.2451039570111	0	0	0	1.03466585445486	2.28098134555346	0	3.9501381358738	0.552607866668054	2.92536184126127	0.0128494433790406	0.309202997093101	Gm6030	16	45025463	45025852	+	390	processed_pseudogene	predicted gene 6030 [Source:MGI Symbol;Acc:MGI:3645112]	-	4	4	6	1	1	7	0	0	0	1	2	0	0.967516498872771	0.971911287717257	1.46441540965694	0.186560317655133	0.19632109310126	1.66083565980697	0	0	0	0.237668036702092	0.522575727784348
ENSMUSG00000050103	57.776960900912	33.5866494938096	57.448180776616	48.3851431344932	55.3939431200399	38.2955494870587	44.4612194103982	34.9952680615352	32.6591722307011	18.6239853801874	20.5288321099812	37.9066454339596	48.4810711521549	31.5291871044604	0.61620880912262	0.012938654141983	0.310954609315829	Agmo	12	37291640	37632201	+	6397	protein_coding	alkylglycerol monooxygenase [Source:MGI Symbol;Acc:MGI:2442495]	-	55	32	54	59	65	37	42	38	30	18	18	44	0.811053185118843	0.474028953834273	0.80351697481567	0.671057200132034	0.777980257951687	0.535203076688058	0.62620868449186	0.496513879994071	0.462371925238839	0.260814384500341	0.286734532518847
ENSMUSG00000045180	48.3225491171264	26.2395699170387	27.6602351887411	37.7240099014693	37.4974384197193	38.2955494870587	15.8790069322851	29.4696994202401	20.6841424127774	23.7973146524617	22.8098134555346	26.7069547375624	35.9565586718589	23.2244886018102	0.624894650389528	0.0129919235493426	0.311839097816792	Shroom2	X	151392505	151552461	-	8375	protein_coding	shroom family member 2 [Source:MGI Symbol;Acc:MGI:107194]	-	46	25	26	46	44	37	15	32	19	23	20	31	0.518126745963508	0.28286970314159	0.295505915500922	0.399628907311414	0.402253129267776	0.408799293322209	0.170825456490167	0.319366464384309	0.223673914066883	0.25455310916033	0.243348697117488
ENSMUSG00000051000	1168.14510039662	1342.4163969557	1356.41537944788	1506.50013454346	1394.22293760593	1656.02376160254	1095.65147832767	1119.84857796913	1280.23955144348	1292.29765221412	1246.55630534497	1272.45716604451	1403.95395175869	1217.84178855731	0.205577691415252	0.013103048100486	0.313315056726014	Fhip1a	3	85567368	85724598	-	5290	protein_coding	FHF complex subunit HOOK interacting protein 1A [Source:MGI Symbol;Acc:MGI:2444746]	-	1112	1279	1275	1837	1636	1600	1035	1216	1176	1249	1093	1477	19.8295158426816	22.9111091411269	22.9420467061094	25.2660507330184	23.6787732027085	27.9870767410086	18.6608243231107	19.2133038355966	21.9178626966941	21.8847783285361	21.054664979455
ENSMUSG00000061175	137.614215963991	141.693677552009	113.832506353665	150.896039605877	146.580895640721	144.902079140222	123.856254071824	118.799725787843	130.636688922804	95.1892586098469	90.0987631493618	108.550848288157	139.253235709414	111.188589804973	0.326191675113548	0.0131557316563142	0.314002619382452	Fnip2	3	79363281	79475103	-	8698	protein_coding	folliculin interacting protein 2 [Source:MGI Symbol;Acc:MGI:2683054]	-	131	135	107	184	172	140	117	129	120	92	79	126	1.42074091536589	1.47077285865468	1.17095989585698	1.53915479362294	1.51405138252846	1.48936745763329	1.28295848990805	1.23963678417164	1.36021761589002	0.980401144731094	0.925532201255218
ENSMUSG00000024515	903.421570450625	1049.58279668155	925.554023623258	1089.07576411198	1101.91336083402	1138.51633610174	988.732831650284	885.932838820969	882.886289303286	890.847300685632	976.260015896883	813.269847492223	1034.67730863386	906.321520641546	0.192731416063922	0.0132060531850913	0.314527737253978	Smad4	18	73772080	73836851	-	3712	protein_coding	SMAD family member 4 [Source:MGI Symbol;Acc:MGI:894293]	MH1	860	1000	870	1328	1293	1100	934	962	811	861	856	944	21.8551342754531	25.5283810755476	22.3094535064924	26.0299891486925	26.6699454790335	27.4206626407477	23.9985529279851	21.6616359267938	21.5406814822698	21.4996093869061	23.4990141384061
ENSMUSG00000070639	42.019607927936	53.528722630759	58.512035976183	55.7659276804329	35.7930094006411	48.6456979970745	30.6994134024178	34.0743399546527	34.8364503794145	42.4213000326491	20.5288321099812	37.9066454339596	49.0441669355044	33.4111635521791	0.545690753899358	0.0132289049005527	0.314527737253978	Lrrc8b	5	105563641	105637940	+	6726	protein_coding	leucine rich repeat containing 8 family, member B [Source:MGI Symbol;Acc:MGI:2141353]	-	40	51	55	68	42	47	29	37	32	41	18	44	0.561004214333007	0.718529419889096	0.778365312150393	0.735590190932818	0.478105784269795	0.646597800523803	0.411232359451377	0.459800044375779	0.469072170602098	0.565018124719959	0.272709010485142
ENSMUSG00000028907	372.924020360432	365.254813245179	420.222803828951	349.357135174477	296.570649319598	393.305643380602	219.130295665534	280.883072599164	369.048646206922	311.434422190912	275.998742811969	328.237088871332	366.272510884873	297.455378057639	0.298169017313479	0.0132561338499037	0.314592309335184	Utp11	4	124571953	124587393	-	4711	protein_coding	UTP11 small subunit processome component [Source:MGI Symbol;Acc:MGI:1914455]	-	355	348	395	426	348	380	207	305	339	301	242	381	7.10850452499125	6.99998938489631	7.98107952514154	6.57931037470258	5.65584775115751	7.46386405019839	4.19086226572938	5.41141551993783	7.09468546487099	5.92227782391393	5.2346314145921
ENSMUSG00000117050	8.40392158558721	0	13.8301175943705	6.56069737416857	3.4088580381563	31.0504455300476	0	1.84185621376501	1.0886390743567	1.03466585445486	0	8.61514668953626	10.5423400203884	2.09671797201881	2.27148704885975	0.0133007460965274	0.314794805823406	1700023B13Rik	17	29312390	29313435	-	1046	TEC	RIKEN cDNA 1700023B13 gene [Source:MGI Symbol;Acc:MGI:1920529]	-	8	0	13	8	4	30	0	2	1	1	0	10	0.721475018279887	0	1.18301244852783	0.556470545969423	0.292792452426354	2.65388926792427	0	0.159816810421761	0.0942572723311936	0.088614277546669	0
ENSMUSG00000027333	2314.22990663108	3020.6992888495	2927.72950920828	3029.40201252234	3630.43381063646	3497.31518153436	2215.65076728484	2128.26485500547	3067.78491153719	2910.51504858151	2491.97212001716	2451.87074784202	3069.968284897	2544.3430750447	0.271261087421636	0.013304453356196	0.314794805823406	Smox	2	131333416	131367842	+	3894	protein_coding	spermine oxidase [Source:MGI Symbol;Acc:MGI:2445356]	-	2203	2878	2752	3694	4260	3379	2093	2311	2818	2813	2185	2846	53.3680759075834	70.0367660220598	67.2713478375533	69.0215683700679	83.7616497376563	80.2944398286822	51.2648189288492	49.6053074901624	71.3496084044816	66.9590326206378	57.1793665166195
ENSMUSG00000029009	160.725000324355	134.346597975238	121.279492750634	154.176388292961	177.260617984128	154.217212799236	123.856254071824	107.748588505253	104.509351138243	156.234544022683	103.784651222683	115.442965639786	150.334218354425	118.596059100079	0.34460004705219	0.0133145337134095	0.314794805823406	Mthfr	4	148123534	148144008	+	7315	protein_coding	methylenetetrahydrofolate reductase [Source:MGI Symbol;Acc:MGI:106639]	-	153	128	114	188	208	149	117	117	96	151	91	134	1.9730591075782	1.65816170481358	1.48343379160053	1.86993882303136	2.17711101467864	1.88479953503335	1.52551919961998	1.33689001319453	1.29390816929722	1.9133657800938	1.26768370328548
ENSMUSG00000074207	610.334805153271	483.857669270194	518.097482189111	557.659276804329	432.92497084585	486.456979970745	274.177519697456	199.841399193503	280.868881184029	405.589014946304	329.601804432476	587.553004226373	514.888530705583	346.271937280024	0.571436483744748	0.0133465945439588	0.315159360939516	Adh1	3	137966752	137996459	+	2233	protein_coding	alcohol dehydrogenase 1 (class I) [Source:MGI Symbol;Acc:MGI:87921]	-	581	461	487	680	508	470	259	217	258	392	289	682	24.5442861038492	19.5633598767001	20.7595476008465	22.156648563431	17.4183318249985	19.4761164636055	11.0625994419834	8.12260171588716	11.3914113611619	16.2716925441181	13.188425946837
ENSMUSG00000026819	2469.70245596444	3402.74742684158	3087.30778914333	3238.52424132396	2670.84027289546	3969.28195359108	764.309533673988	2391.65029357386	2685.67259643799	1535.44412801101	724.211577213225	2421.71773442864	3139.73402329331	1753.83431055645	0.839993843877527	0.0134231182080433	0.316177876397915	Slc25a25	2	32304499	32341457	-	7862	protein_coding	solute carrier family 25 (mitochondrial carrier, phosphate carrier), member 25 [Source:MGI Symbol;Acc:MGI:1915913]	-	2351	3242	2902	3949	3134	3835	722	2597	2467	1484	635	2811	28.2086683621043	39.0761000370117	35.1351664619165	36.5458421297186	30.5209131587314	45.136258578157	8.75891485654134	27.6097871070921	30.9373180640731	17.4958983619566	8.23046800978084
ENSMUSG00000022265	4033.88236108186	4383.05775894215	4085.20396633714	4615.45060272759	3846.04408154984	4497.13952760189	3678.63660597938	3928.67930396076	4096.54883680427	3987.60220306902	3550.34746435397	3697.62095914896	4243.46304970675	3823.23922888606	0.150456377851816	0.0134936115987778	0.317049648210488	Ank	15	27466763	27594995	+	3610	protein_coding	progressive ankylosis [Source:MGI Symbol;Acc:MGI:3045421]	-	3840	4176	3840	5628	4513	4345	3475	4266	3763	3854	3113	4292	100.342985367857	109.618670334338	101.251547437776	113.430740284655	95.7171374888462	111.371945679695	91.8107961849567	98.7728981813235	102.77170667819	98.9554900956914	87.8730628574991
ENSMUSG00000020893	1848.86274882919	2084.47143420956	1954.30200160451	2200.29388186179	1710.39452064492	2297.73296922352	1263.96895180989	1455.98733698124	2160.94856259806	1887.23051852566	1309.28329234769	1761.79749801017	2016.00959272891	1639.86936004545	0.297817255738676	0.0136602622233954	0.320170848993394	Per1	11	68986043	69000786	+	5631	protein_coding	period circadian clock 1 [Source:MGI Symbol;Acc:MGI:1098283]	-	1760	1986	1837	2683	2007	2220	1194	1581	1985	1824	1148	2045	29.4842534552597	33.4214246487535	31.0528364393689	34.667220668585	27.2893640921949	36.4804910130368	20.223901717132	23.4676979782931	34.7553395691672	30.02442454065	20.7749604727054
ENSMUSG00000033581	11.5553921801824	23.0908215269941	12.7662623948036	17.2218306071925	18.7487192098596	12.420178212019	6.35160277291403	11.0511372825901	9.79775166921033	5.17332927227429	10.2644160549906	7.75363202058264	15.9672006885085	8.39864484542699	0.931639814062523	0.0137647101157568	0.321002398402877	Igf2bp2	16	21877759	21982049	-	7402	protein_coding	insulin-like growth factor 2 mRNA binding protein 2 [Source:MGI Symbol;Acc:MGI:1890358]	-	11	22	12	21	22	12	6	12	9	5	9	9	0.140186631321406	0.281646813314444	0.15431559301978	0.206421102620311	0.227564844475657	0.150011790016146	0.0773122506406459	0.135505309674003	0.119878135872177	0.0626118172884462	0.123901702548167
ENSMUSG00000064354	7489.9951131546	3869.81177136487	3258.58847627361	13607.7064411974	7551.47276902574	15682.545022376	7585.93091178366	3610.03817897942	2471.21069878972	3542.69588565343	2886.58189279791	4254.15943529301	8576.6865988987	4058.43616721619	1.0795027008496	0.0137753398009886	0.321002398402877	mt-Co2	MT	7013	7696	+	684	protein_coding	mitochondrially encoded cytochrome c oxidase II [Source:MGI Symbol;Acc:MGI:102503]	-	7130	3687	3063	16593	8861	15152	7166	3920	2270	3424	2531	4938	983.323511847776	510.796929074297	426.254073078432	1765.03243688909	991.877880597082	2049.77922886051	999.233184953365	479.020514699235	327.202269837182	463.994721477347	377.068183580886
ENSMUSG00000048489	379.226961549623	183.676989419271	293.624035080482	414.964108916162	149.137539169338	220.458163263338	93.1568406694058	163.925203025086	186.157281714996	107.605248863305	54.7435522932832	249.839253996552	273.514632899702	142.571230093771	0.938412734285183	0.0139749809725745	0.324733975041247	Depp1	6	116627570	116629755	+	1358	protein_coding	DEPP1 autophagy regulator [Source:MGI Symbol;Acc:MGI:1918730]	-	361	175	276	506	175	213	88	178	171	104	48	290	25.076702480909	12.2115142464475	19.3458118182956	27.1103189146274	9.86665287493447	14.5135302188265	6.18057738994862	10.9558071792367	12.4148904807005	7.09853871033641	3.60184743156223
ENSMUSG00000033671	731.141177946087	799.78209107134	741.507074098174	1011.16748279373	936.583745983443	898.392890669376	658.449487458754	714.640210940823	670.601669803729	806.004700620334	770.971694797071	758.132908679191	853.095743760359	729.800112049984	0.22657110926543	0.0141629544381961	0.327095159939705	Cep350	1	155720710	155849001	-	16520	protein_coding	centrosomal protein 350 [Source:MGI Symbol;Acc:MGI:1921331]	-	696	762	697	1233	1099	868	622	776	616	779	676	880	3.9743141412534	4.37095333661947	4.0160617514835	5.43046367741065	5.09353412313142	4.86186516393855	3.59109164334707	3.92623080363503	3.67635313709394	4.37081877908369	4.16985063175138
ENSMUSG00000110298	5.252450990992	4.1983311867262	9.57469679610267	4.10043585885536	17.0442901907815	6.21008910600951	3.17580138645702	2.76278432064751	1.0886390743567	6.20799512672914	0	0.861514668953626	7.73004902157787	2.34945576285733	1.72250396941437	0.0142754440886699	0.32851433716058	Gm8189	19	8450677	8519162	-	2926	transcribed_unprocessed_pseudogene	predicted gene 8189 [Source:MGI Symbol;Acc:MGI:3779786]	-	5	4	9	5	20	6	3	3	1	6	0	1	0.161197639508023	0.129543883188561	0.292782985184316	0.124331038765383	0.523343993913134	0.18974491963423	0.0977896922833323	0.0856980777688798	0.033695525242115	0.190069448353689	0
ENSMUSG00000010311	6.3029411891904	0	5.31927599783482	4.10043585885536	2.55664352861722	4.14005940400634	1.05860046215234	0	0	0	0	1.72302933790725	3.73655932975069	0.463604966676599	2.90971370815579	0.0142928729490837	0.32851433716058	Optc	1	133824937	133835737	-	2575	protein_coding	opticin [Source:MGI Symbol;Acc:MGI:2151113]	-	6	0	5	5	3	4	1	0	0	0	0	2	0.219804719161387	0	0.184829129374176	0.141278687156315	0.0892022054091163	0.143739452388287	0.0370398238991625	0	0	0	0
ENSMUSG00000041417	978.006374522711	1045.38446549482	1596.84665455001	1699.22061990966	1018.39633889919	2152.8308900833	494.366415825142	553.477792236385	811.036110395744	1583.03875731593	458.477250456246	858.930124946766	1415.11422390995	793.221075196036	0.835061140645228	0.0143016183843897	0.32851433716058	Pik3r1	13	101817071	101904725	-	10079	protein_coding	phosphoinositide-3-kinase regulatory subunit 1 [Source:MGI Symbol;Acc:MGI:97583]	-	931	996	1501	2072	1195	2080	467	601	745	1530	402	997	8.71355207797685	9.36425291697816	14.1755818477209	14.9574026679988	9.07782968943767	19.0958554169973	4.41921958868344	4.98403604546077	7.28761430792035	14.0704948407717	4.06436266504763
ENSMUSG00000020611	544.153922666772	509.047656390551	427.669790225919	553.558840945473	571.835935900719	505.087247288774	401.209575155736	475.198903151372	388.644149545343	416.970339345307	464.17970382013	507.432140013686	518.558898903035	442.272468505263	0.229378120179473	0.0143550224661435	0.329122779011896	Gna13	11	109253657	109292195	+	6421	protein_coding	guanine nucleotide binding protein, alpha 13 [Source:MGI Symbol;Acc:MGI:95768]	-	518	485	402	675	671	488	379	516	357	403	407	589	7.61009512156507	7.15764756547731	5.95937932632545	7.64865342200808	8.00113173238884	7.0325103516244	5.6296667401947	6.71693552326736	5.4816600449243	5.81751835048556	6.45915319040723
ENSMUSG00000031311	882.411766486657	925.732026673126	809.593806870459	852.890658641915	947.662534607451	929.443336199423	788.657344303492	813.179518377251	791.440607057323	826.698017709431	805.186414980373	805.516215471641	891.289021579839	805.113019649919	0.146787792740972	0.0143804567813205	0.329307243681558	Nono	X	100472924	100492197	+	4375	protein_coding	non-POU-domain-containing, octamer binding protein [Source:MGI Symbol;Acc:MGI:1855692]	-	840	882	761	1040	1112	898	745	883	727	799	706	935	18.1119088588983	19.1038882713704	16.5570990259841	17.2957405350679	19.4606929499782	18.9929098702888	16.2414336394413	16.8696780352144	16.3833574139606	16.9279398666832	16.4441143872163
ENSMUSG00000024084	25.2117647567616	30.4379011037649	30.8518007874419	25.4227023249032	18.7487192098596	31.0504455300476	16.9376073944374	26.7069150995926	17.4182251897072	10.3466585445486	13.6858880733208	11.1996906963971	26.9538889521298	16.049164166334	0.739122108406165	0.0144258369986258	0.329801809041677	Qpct	17	79359335	79397807	+	2539	protein_coding	glutaminyl-peptide cyclotransferase (glutaminyl cyclase) [Source:MGI Symbol;Acc:MGI:1917786]	-	24	29	29	31	22	30	16	29	16	10	12	13	0.891685154534181	1.08234705239092	1.08720876219115	0.888347475561466	0.663424568258689	1.09333130139771	0.601040072723708	0.95468356190108	0.621303548536769	0.365067090641259	0.481617645929648
ENSMUSG00000032898	300.440196684743	257.14778518698	301.071021477451	300.971992039983	262.482068938035	274.27893551542	244.53670675719	182.343765162736	226.436927466194	242.111809942437	238.362550610337	280.853782078882	282.731999973769	235.774257002963	0.261510144000665	0.0144390515980097	0.329801809041677	Fbxo21	5	118114795	118148266	+	5545	protein_coding	F-box protein 21 [Source:MGI Symbol;Acc:MGI:1924223]	-	286	245	283	367	308	265	231	198	208	234	209	326	4.86550001281645	4.18693072774499	4.85805616963739	4.81557768547867	4.25285657408897	4.42219156102151	3.97334774586462	2.98461135913706	3.69835279108262	3.91155726409971	3.84086091719587
ENSMUSG00000018932	2659.84118183835	3088.9221706338	3084.11622354463	3774.86125166224	2573.68781880801	3766.41904279477	2468.65627773925	2363.10152226051	3110.2418354371	2698.40854841827	2512.50095212714	2799.92267409929	3157.9746148803	2658.80530168026	0.248311903308136	0.0144985518934545	0.330262937609574	Map2k3	11	60822859	60843637	+	3314	protein_coding	mitogen-activated protein kinase kinase 3 [Source:MGI Symbol;Acc:MGI:1346868]	-	2532	2943	2899	4603	3020	3639	2332	2566	2857	2608	2203	3250	72.0732643562827	84.1528831248669	83.2670844051613	101.058384262211	69.7727771438335	101.606801308503	67.1154008847559	64.7184780593212	84.9971352729421	72.9441501178128	67.7401007906576
ENSMUSG00000030447	586.173530594708	482.808086473513	481.926405403835	469.089862253053	600.811229225048	547.522856179839	472.135806119943	500.0639620372	457.228411229815	421.109002763127	379.783394034652	472.110038586587	528.055328354999	450.405102461887	0.2280966711282	0.0145216266169353	0.330262937609574	Cyfip1	7	55491493	55582350	+	11941	protein_coding	cytoplasmic FMR1 interacting protein 1 [Source:MGI Symbol;Acc:MGI:1338801]	-	558	460	453	572	705	529	446	543	420	407	333	548	4.40815133750717	3.65046656512176	3.61106370801009	3.48529232581083	4.52043250550134	4.09928583361976	3.56238051729279	3.80087230339715	3.46780879997822	3.15928711713617	2.8417598931142
ENSMUSG00000041801	3260.72157520784	3303.03706115684	3134.11741792427	3505.05257214956	3032.17922494003	3443.49440928227	2582.98512765171	2519.65930043053	3098.26680561918	3255.05877811498	2948.16838912785	3028.224061372	3279.76704344347	2905.39374371937	0.174996230738388	0.0146047120937896	0.331635536729241	Phlda3	1	135693857	135696874	+	1559	protein_coding	pleckstrin homology like domain, family A, member 3 [Source:MGI Symbol;Acc:MGI:1351485]	-	3104	3147	2946	4274	3558	3327	2440	2736	2846	3146	2585	3515	187.81859731806	191.28542026203	179.872294288138	199.467563237098	174.739624893631	197.469448700571	149.275954816189	146.687844068755	179.984594046881	187.045812027751	168.965593318086
ENSMUSG00000052040	1173.39755138761	1531.34130035838	1560.67557776474	1426.13159170989	1398.48401015362	1648.77865764553	1142.22989866237	1036.04412024282	1509.94239613275	1352.3082717725	926.078426294707	1274.18019538241	1456.46811483663	1206.79721808126	0.271118021264898	0.0147136542449592	0.332118217033417	Klf13	7	63536099	63588663	-	7531	protein_coding	Kruppel-like factor 13 [Source:MGI Symbol;Acc:MGI:1354948]	zf-C2H2	1117	1459	1467	1739	1641	1593	1079	1125	1387	1307	812	1479	13.9914756474554	18.3583601720886	18.5419375100036	16.8008329620088	16.6835129961327	19.5729531340606	13.6651670053154	12.486019895353	18.158098421543	16.0863800754425	10.9872049843811
ENSMUSG00000050335	93.4936276396577	47.2312258506697	131.918044746303	68.067235256999	78.4037348775949	92.1163217391411	44.4612194103982	17.4976340307676	89.2684040972496	78.6346049385691	29.652757492195	39.6296747718668	85.205031685061	49.8573824568411	0.775238699956999	0.0148051953341844	0.332790730000773	Lgals3	14	47605208	47623617	+	1858	protein_coding	lectin, galactose binding, soluble 3 [Source:MGI Symbol;Acc:MGI:96778]	-	89	45	124	83	92	89	42	19	82	76	26	46	4.51863531699057	2.2950811490094	6.35263089442137	3.25024622308755	3.79117374621809	4.43238549530215	2.15600481953414	0.854736084586133	4.35125659977994	3.79143197408504	1.42597359519195
ENSMUSG00000028967	815.180393801959	664.385910299421	724.485390905102	683.132614085303	574.392579429336	824.906836248263	422.381584398783	628.072968893868	774.022381867616	457.322307669047	467.60117583846	642.689943039405	714.413954128231	565.348393617863	0.336411498107724	0.0148328425696512	0.332825086000065	Errfi1	4	150938376	150953349	+	3582	protein_coding	ERBB receptor feedback inhibitor 1 [Source:MGI Symbol;Acc:MGI:1921405]	-	776	633	681	833	674	797	399	682	711	442	410	746	20.4361525138788	16.7459338078419	18.0966912642279	16.9201145719216	14.406745542322	20.5885597885379	10.6241320685642	15.9141314467047	19.569988547276	11.4375254513419	11.6638552306976
ENSMUSG00000020642	139.715196360387	93.4128689046579	144.684307141107	118.092552735034	143.172037602565	94.1863514411443	85.7466374343394	86.5672420469554	96.8888776177466	114.847909844489	92.3797444949153	89.5975255711771	122.210552364149	94.3379895016038	0.375813145786941	0.0148619087413458	0.333082636382966	Rnf144a	12	26350963	26465253	-	7340	protein_coding	ring finger protein 144A [Source:MGI Symbol;Acc:MGI:1344401]	-	133	89	136	144	168	91	81	94	89	111	81	104	1.70930111704805	1.1490136511126	1.7636828639465	1.42741518249486	1.7524465967295	1.1471984734634	1.05253150814275	1.07042425530717	1.19547500141691	1.40172333907814	1.12453455318171
ENSMUSG00000074903	43.0700981261344	12.5949935601786	44.6819183818125	13.9414819201082	29.8275078338676	33.1204752320507	14.8204064701327	12.8929934963551	17.4182251897072	22.7626487980069	12.5453974005441	17.2302933790725	29.5394125090253	16.2783274556364	0.852650843640885	0.0149157374988705	0.333204552982092	Gm2058	7	39238355	39239141	+	560	processed_pseudogene	predicted gene 2058 [Source:MGI Symbol;Acc:MGI:3805010]	-	41	12	42	17	35	32	14	14	16	22	11	20	6.90651286472126	2.0306003689807	7.13902512207756	2.20874090366703	4.78532664434322	5.28755842714055	2.38443866350859	2.08960479626452	2.81694591024081	3.64141384804276	2.00165167160255
ENSMUSG00000047875	1172.34706118942	1450.5234250139	1241.51901789465	1596.70972343828	1385.70079251054	1828.8712417198	1021.54944597701	1216.54602919179	1466.39683315848	1254.01501559929	1054.95387231848	1194.92084583868	1445.94521029443	1201.39700701395	0.267451015914494	0.0150630467548826	0.33442436042669	Gpr157	4	150171822	150190384	+	4900	protein_coding	G protein-coupled receptor 157 [Source:MGI Symbol;Acc:MGI:2442046]	-	1116	1382	1167	1947	1626	1767	965	1321	1347	1212	925	1387	21.4847898453768	26.7265686660126	22.6700471223524	28.9103767357291	25.4071546896394	33.3682705027048	18.7835372268227	22.5336158029831	27.1030438649598	22.9267199159887	19.2366524283881
ENSMUSG00000007080	75.6352942702849	73.4707957677084	91.4915471627589	96.7702862689865	60.5072301772743	64.1709207620983	65.633228653445	53.4138301991853	43.5455629742681	65.183948830656	31.9337388377485	67.1981441783829	77.0076790681852	54.4847422789476	0.493690348607638	0.0151615241415711	0.334847275916854	Pole	5	110434172	110485340	+	11160	protein_coding	polymerase (DNA directed), epsilon [Source:MGI Symbol;Acc:MGI:1196391]	-	72	70	86	118	71	62	62	58	40	63	28	78	0.608599088000614	0.594381231063645	0.733519905016332	0.769310557212297	0.487108518635653	0.514068180416442	0.529875258557464	0.434398129689398	0.353380311320532	0.52325301628767	0.255668770045031
ENSMUSG00000022802	86.1401962522689	69.2724645809822	69.1505879718526	105.791245158468	73.2904478203604	67.275965315103	52.9300231076169	65.3858955886578	46.8114801973382	64.1492829762011	57.0245336388366	64.613600171522	78.4868178498392	58.4858026133621	0.425132111585207	0.0151803618722026	0.334847275916854	Lmln	16	32882891	32948065	+	6511	protein_coding	leishmanolysin-like (metallopeptidase M8 family) [Source:MGI Symbol;Acc:MGI:2444736]	-	82	66	65	129	86	65	50	71	43	62	50	75	1.18803477322805	0.960566600592927	0.950261880786446	1.44153733393177	1.01130540049397	0.923759439544213	0.732433931349589	0.91145409635866	0.651129410983324	0.882631412602761	0.782539294409061
ENSMUSG00000015127	95.5946080360545	77.6691269544346	104.257809557562	87.7493273795047	119.31003133547	94.1863514411443	74.1020323506637	55.2556864129503	70.7615398331857	87.9465976286629	85.5368004582549	69.7826881852437	96.4612091173618	73.8975574781602	0.390603574513371	0.0152308949510476	0.334847275916854	Unkl	17	25407371	25453417	+	5673	protein_coding	unkempt family like zinc finger [Source:MGI Symbol;Acc:MGI:1921404]	-	91	74	98	107	140	91	70	60	65	85	75	81	1.51318352481027	1.23609024164992	1.64433741574382	1.37231835990635	1.88949967976887	1.48430051035102	1.17687788785899	0.884021066637555	1.12965837225416	1.38880581996727	1.34720077892581
ENSMUSG00000029096	695.424511207341	564.675544614674	761.720322889946	559.299451147871	670.692819007252	642.744222471984	574.82005094872	561.766145198328	473.557997345166	692.1914566303	410.576642199624	479.002155938216	649.092811889845	531.985741376725	0.286139903020272	0.0152363557058022	0.334847275916854	Htra3	5	35809367	35837126	-	4439	protein_coding	HtrA serine peptidase 3 [Source:MGI Symbol;Acc:MGI:1925808]	-	662	538	716	682	787	621	543	610	435	669	360	556	14.0681127325395	11.4849305242642	15.3534339187731	11.1784891394261	13.5744161084861	12.9449293099684	11.6670438773162	11.4860006823281	9.66163583766983	13.9693551376307	8.26420727426476
ENSMUSG00000044197	780.514217261412	800.831673868022	920.234747625424	980.824257438202	867.554370710778	1212.00239052286	725.141316574352	727.533204437178	910.102266162204	819.455356728247	729.914030577109	757.271394010238	926.993609571116	778.236261414888	0.252698267692663	0.0153273805561291	0.336349864393943	Gpr146	5	139363452	139382170	+	6786	protein_coding	G protein-coupled receptor 146 [Source:MGI Symbol;Acc:MGI:1933113]	-	743	763	865	1196	1018	1171	685	790	836	792	640	879	10.3285166474493	10.6547171340268	12.1333269095139	12.8233413744563	11.485912228568	15.9674758426433	9.6277069525693	9.73054989124062	12.1461593477227	10.8179933947159	9.61058809718342
ENSMUSG00000051149	65.1303922883009	39.8841462738989	24.4686695900402	53.3056661651197	67.3249462535869	62.1008910600951	30.6994134024178	25.7859869927101	38.1023676024846	36.21330490592	41.0576642199624	35.3221014270987	52.0357852718403	34.5301397584323	0.599275355731425	0.0155946374706432	0.33896012971921	Adnp	2	168022906	168049032	-	5350	protein_coding	activity-dependent neuroprotective protein [Source:MGI Symbol;Acc:MGI:1338758]	Homeobox	62	38	23	65	79	60	29	28	35	35	36	41	1.09320322162353	0.673071274951857	0.409215147184508	0.883982065898622	1.13058932307473	1.03774511186871	0.516999784985039	0.437449976040423	0.64500163365327	0.606386673081038	0.685697497017968
ENSMUSG00000038268	19.9593137657696	48.2808086473513	38.2987871844107	45.1047944474089	38.3496529292584	36.2255197850555	27.5236120159608	14.7348497101201	25.0386987102042	27.9359780702811	31.9337388377485	18.0918080480262	37.7031461265424	24.2097808987235	0.653704245881731	0.0156240621336172	0.33896012971921	Ovca2	11	75066768	75069661	-	2670	protein_coding	candidate tumor suppressor in ovarian cancer 2 [Source:MGI Symbol;Acc:MGI:2179725]	-	19	46	36	55	45	35	26	16	23	27	28	21	0.671282514667344	1.63259255633404	1.28342024666563	1.49877109127439	1.29042516251952	1.21296986390396	0.928770116123195	0.500879052288125	0.849303916757998	0.937320009914991	1.06863800513204
ENSMUSG00000028862	308.84411827033	333.767329344733	351.072215857098	391.181580934801	194.304908174909	475.071816609728	122.797653609671	104.064876077723	357.073616388999	214.175831872155	79.8343470943713	232.608960617479	342.373661531933	185.092547610066	0.887067749745497	0.0156768869886291	0.33896012971921	Map3k6	4	132968129	132980240	+	4604	protein_coding	mitogen-activated protein kinase kinase kinase 6 [Source:MGI Symbol;Acc:MGI:1855691]	-	294	318	330	477	228	459	116	113	328	207	70	270	6.02386195486273	6.5452018843774	6.82269994290644	7.53818763974467	3.79167497796787	9.22508971894145	2.40308327512594	2.05147994767933	7.02400935047014	4.16745017440484	1.54933941882197
ENSMUSG00000020806	616.637746342461	554.179716647858	463.840867011196	469.909949424824	460.1958351511	469.89674235472	392.740771458518	350.873608722234	410.416931032477	497.674275992786	370.659468652438	495.370934648335	505.776809488693	419.622665084465	0.267583069184125	0.0157368758651252	0.33896012971921	Rhbdf2	11	116488991	116517845	-	5293	protein_coding	rhomboid 5 homolog 2 [Source:MGI Symbol;Acc:MGI:2442473]	-	587	528	436	573	540	454	371	381	377	481	325	575	10.4616263029919	9.45286096574426	7.84083368782875	7.87656039795818	7.81130213624134	7.93683198632753	6.68525784365529	6.01654583318936	7.02240719547091	8.42322822689314	6.25698786101135
ENSMUSG00000060798	63.029411891904	38.8345634772173	67.0228775727187	86.1091530359625	62.2116591963524	48.6456979970745	27.5236120159608	52.4929020923027	38.1023676024846	42.4213000326491	52.4625709477297	38.7681601029132	60.9755605285383	41.9618187990067	0.544392128210382	0.0157534201833825	0.33896012971921	Intu	3	40585435	40659204	+	7428	protein_coding	inturned planar cell polarity protein [Source:MGI Symbol;Acc:MGI:2443752]	-	60	37	63	105	73	47	26	57	35	41	46	45	0.76197785654358	0.472020728384492	0.80732109619617	1.02849286590976	0.752458470731405	0.58548960774409	0.333847093436851	0.641397271874408	0.464560950463785	0.511619804370819	0.631058734279161
ENSMUSG00000069729	1126.12549246869	1258.44977322118	1174.49614032193	1180.10544017857	1293.66162548032	1393.12998944813	1071.30366769817	957.765231157805	1032.02984249015	1185.72706920527	1207.77962247056	1095.84665890901	1237.66141018647	1091.74201532183	0.18157042467471	0.0157626916623548	0.33896012971921	Arid1b	17	5044607	5397931	+	12600	protein_coding	AT rich interactive domain 1B (SWI-like) [Source:MGI Symbol;Acc:MGI:1926129]	ARID	1072	1199	1104	1439	1518	1346	1012	1040	948	1146	1059	1272	8.0257797192208	9.01736978669577	8.34019442833188	8.30948538660614	9.22428678871492	9.8847967262933	7.66048230943076	6.89901266068286	7.41795756363414	8.43042478758991	8.56464291000848
ENSMUSG00000033257	300.440196684743	447.12227138634	319.156559870089	478.930908314306	426.107254769537	408.830866145626	315.462937721397	282.724928812929	313.52805341473	386.965029566117	350.130636542457	290.330443437372	396.764676195107	323.190338249167	0.299023225874587	0.0157796563679662	0.33896012971921	Ttll4	1	74700904	74742889	+	11527	protein_coding	tubulin tyrosine ligase-like family, member 4 [Source:MGI Symbol;Acc:MGI:1914784]	-	286	426	300	584	500	395	298	307	288	374	307	337	2.34052204138694	3.50206778306032	2.47732284968424	3.68621306056504	3.32112545803294	3.17083782663391	2.46573339715645	2.22610799844958	2.46333085583651	3.00739653278104	2.71397553082415
ENSMUSG00000025915	128.159804180205	126.999518398467	107.449375156263	126.293424452745	109.083457221002	105.571514802162	105.860046215234	98.539307436428	77.2933742793259	103.466585445486	87.8177818038084	89.5975255711771	117.259515701807	93.7624367919098	0.321966337075796	0.015826861397464	0.33896012971921	Sgk3	1	9868332	9971070	+	14311	protein_coding	serum/glucocorticoid regulated kinase 3 [Source:MGI Symbol;Acc:MGI:2182368]	-	122	121	101	154	128	102	100	107	71	100	77	104	0.804179215574846	0.801210496600122	0.671783045517279	0.782951064102251	0.684812309944442	0.659513087306679	0.666463185943285	0.624939454127045	0.489141959817512	0.64768733361621	0.548282758205715
ENSMUSG00000022948	42.019607927936	64.0245505975745	72.3421535705535	59.8663635392882	46.01958351511	78.6611286761205	38.1096166374842	25.7859869927101	47.9001192716949	36.21330490592	53.6030616205064	48.2448214614031	60.4888979710971	41.6428184816198	0.539611244727862	0.0158698384380027	0.33896012971921	Setd4	16	93380345	93400951	-	5379	protein_coding	SET domain containing 4 [Source:MGI Symbol;Acc:MGI:2136890]	-	40	61	68	73	54	76	36	28	44	35	47	56	0.701489932255774	1.07463141544867	1.20333075119607	0.987427448157956	0.768641424188983	1.30739035287171	0.638332715272795	0.435091535939071	0.806487581664037	0.603117438368387	0.890389764852864
ENSMUSG00000046856	14.7068627747776	18.8924903402679	6.38313119740178	11.481220404795	12.7832176430861	12.420178212019	4.23440184860935	2.76278432064751	9.79775166921033	7.242660981184	6.84294403666039	6.03060268267538	12.7778500953912	6.15185758983116	1.06561623612488	0.0160182592791786	0.340846959807961	Gpr1	1	63221850	63253702	-	2496	protein_coding	G protein-coupled receptor 1 [Source:MGI Symbol;Acc:MGI:2385324]	-	14	18	6	14	15	12	4	3	9	7	6	7	0.529110585321047	0.683375124176196	0.228814907758896	0.408100694870604	0.460127561956078	0.444866694591152	0.152848632276191	0.100461769051179	0.355503991076064	0.259949415142913	0.244957372398913
ENSMUSG00000074622	527.346079495597	585.667200548304	815.976938067861	1045.61114400812	301.683936376832	1046.4000143626	248.7711086058	334.296902798349	389.7327886197	457.322307669047	142.561334097092	666.812353770107	720.447552143219	373.249465926682	0.94818271796607	0.0161257306323819	0.342364446991087	Mafb	2	160205623	160208985	-	3363	protein_coding	v-maf musculoaponeurotic fibrosarcoma oncogene family, protein B (avian) [Source:MGI Symbol;Acc:MGI:104555]	TF_bZIP	502	558	767	1275	354	1011	235	363	358	442	125	774	14.0812057797585	15.723114364632	21.7093161607037	27.5846321599807	8.05949750626226	27.8174628225347	6.6648003083499	9.02202249234637	10.4954898172219	12.1823420061572	3.78762514562697
ENSMUSG00000028676	481.124510774868	543.683888681043	570.226386967892	589.642676503401	525.816352385609	469.89674235472	401.209575155736	532.296445778088	453.962494006745	458.356973523502	385.485847398535	485.032758620892	530.065092944589	452.72401574725	0.226253491368096	0.0162447522193945	0.343735326850159	Srsf10	4	135583058	135597219	+	7003	protein_coding	serine and arginine-rich splicing factor 10 [Source:MGI Symbol;Acc:MGI:1333805]	-	458	518	536	719	617	454	379	578	417	443	338	563	6.16942014239092	7.00933593976297	7.28548234648688	7.47013832267256	6.74578675324236	5.99880789713432	5.16180067668002	6.89870953728912	5.87081615878405	5.86347375425109	4.918315895797
ENSMUSG00000103897	6.3029411891904	6.2974967800893	7.44698639696875	7.38078454593965	10.2265741144689	11.3851633610174	1.05860046215234	8.28835296194254	0	4.13866341781943	1.14049067277673	1.72302933790725	8.17332439794574	2.72485614209972	1.55208307079239	0.0162706885946063	0.343899889067695	Pcdhga8	18	37858759	37974926	+	4730	protein_coding	protocadherin gamma subfamily A, 8 [Source:MGI Symbol;Acc:MGI:1935221]	-	6	6	7	9	12	11	1	9	0	4	1	2	0.119661131467351	0.1202046730052	0.140868712768268	0.138441165955501	0.194245817275665	0.215191331337115	0.0201643861607491	0.159039688510619	0	0.078385229863692	0.0215438196443865
ENSMUSG00000054320	43.0700981261344	15.7437419502232	47.8734839805134	40.1842714167825	19.6009337193987	26.9103861260412	19.0548083187421	25.7859869927101	13.0636688922804	21.727982943552	18.2478507644277	15.5072640411653	32.2304858865156	18.8979269921463	0.76618812816904	0.016298331066569	0.344100104502434	Lrrc36	8	106140203	106190718	+	2549	protein_coding	leucine rich repeat containing 36 [Source:MGI Symbol;Acc:MGI:2448585]	-	41	15	45	49	23	26	18	28	12	21	16	18	1.51731942104508	0.55763839085386	1.68042960896294	1.39865346033331	0.690859240925188	0.943836439524892	0.673517394164842	0.918147262383783	0.464149581130303	0.763633276025944	0.639637611097359
ENSMUSG00000035757	246.865196576624	224.610718489852	248.942116698669	281.289899917478	266.74314148573	298.084277088457	230.77490074921	193.394902445326	207.93006320213	225.557156271159	217.833718500356	248.116224658644	261.089225042802	220.601160971138	0.243895370428131	0.0164903943323562	0.345841736285892	Selenoo	15	88973287	88984543	+	3744	protein_coding	selenoprotein O [Source:MGI Symbol;Acc:MGI:1919007]	-	235	214	234	343	313	288	218	210	191	218	191	288	5.92099940716409	5.41638061384096	5.9491876017313	6.66564468288654	6.40088563965567	7.11786711345843	5.55350030603496	4.68821588905501	5.02972313300209	5.39704500011	5.19853979202138
ENSMUSG00000022357	523.144118702804	495.403080033691	568.098676568759	685.592875600616	706.485828407893	711.055202638089	222.306097051991	283.645856919811	370.137285281279	644.596827325376	368.378487306885	547.061814785553	614.963296991975	406.021061445149	0.598868052838494	0.0165188330827533	0.346054934647326	Klhl38	15	58177969	58187565	-	2212	protein_coding	kelch-like 38 [Source:MGI Symbol;Acc:MGI:3045310]	-	498	472	534	836	829	687	210	308	340	623	323	635	21.2376869813596	20.2203243493437	22.9791405376095	27.4982486294212	28.6946530789188	28.7385493627022	9.05483036775413	11.6383051943847	15.1544558462322	26.1058783352203	14.8799422307853
ENSMUSG00000037411	383.428922342416	271.841944340521	337.242098262727	328.034868708429	133.797677997635	249.438579091382	114.328849912453	168.529843559498	178.536808194499	241.077144087982	79.8343470943713	231.747445948525	283.964015123852	169.009073132888	0.746905919068884	0.0165695587646065	0.346538956784707	Serpine1	5	137090358	137101122	-	3876	protein_coding	serine (or cysteine) peptidase inhibitor, clade E, member 1 [Source:MGI Symbol;Acc:MGI:97608]	-	365	259	317	400	157	241	108	183	164	233	70	269	8.88325423210391	6.33209230987617	7.78490183590845	7.50861959602704	3.10132624628229	5.75342561054315	2.65757869617056	3.94631246353361	4.17163816428851	5.57195420410709	1.8403402178164
ENSMUSG00000109225	2.1009803963968	3.14874839004465	0	2.46026151531322	3.4088580381563	3.10504455300476	0	0	0	1.03466585445486	0	0	2.37064881548595	0.17244430907581	3.19532182213389	0.0166330395819122	0.346538956784707	4930513N20Rik	7	130254858	130256122	-	1265	TEC	RIKEN cDNA 4930513N20 gene [Source:MGI Symbol;Acc:MGI:1922358]	-	2	3	0	3	4	3	0	0	0	1	0	0	0.149142859510032	0.224730475618417	0	0.172549859017001	0.242103482401554	0.219444124446544	0	0	0	0.0732731496551903	0
ENSMUSG00000040549	929.683825405585	1083.16944617536	918.10703722629	1062.83297461531	968.967897345928	1042.2599549586	829.942762327433	970.65822465416	784.908772611183	914.644615338094	858.789476600879	951.112194524804	1000.83685595451	885.009341009425	0.176553018840028	0.0166797735663035	0.3467415497241	Ckap5	2	91357107	91451009	+	9462	protein_coding	cytoskeleton associated protein 5 [Source:MGI Symbol;Acc:MGI:1923036]	-	885	1032	863	1296	1137	1007	784	1054	721	884	753	1104	8.82314308777048	10.3354168008994	8.68171447946584	9.9656570445583	9.20045046648613	9.84781213086919	7.90276859941125	9.31068888295415	7.51274889504618	8.65973708871414	8.10953360697683
ENSMUSG00000037112	262.6225495496	246.651957220164	262.77223429304	244.385977187779	253.959923842644	301.189321641461	179.962078565898	220.101817544919	210.107341350844	256.597131904805	212.131265136472	241.224107307015	261.930327289115	220.020623634992	0.248460303758651	0.0168310672212135	0.348618419355169	Sik2	9	50804101	50920373	-	9539	protein_coding	salt inducible kinase 2 [Source:MGI Symbol;Acc:MGI:2445031]	-	250	235	247	298	298	291	170	239	193	248	186	280	2.47229423000564	2.33451277700196	2.4647436211387	2.27298879524894	2.39191083344464	2.82282118568123	1.69977805973985	2.09420503745558	1.99480759237621	2.40981785405455	1.98698203655921
ENSMUSG00000027845	74.5848040720865	71.3716301743453	96.8108231605937	75.4480198029386	73.2904478203604	82.8011880801268	43.4026189482459	50.6510458785377	44.6342020486248	64.1492829762011	34.214720183302	92.182069578038	79.0511521850752	54.8723232688249	0.515093216599527	0.0168436927716749	0.348618419355169	Dclre1b	3	103707921	103716760	-	8405	protein_coding	DNA cross-link repair 1B [Source:MGI Symbol;Acc:MGI:2156057]	-	71	68	91	92	86	80	41	55	41	62	30	107	0.796862934377961	0.766659350097015	1.03057907770622	0.796405020519475	0.78341575997814	0.88073549054096	0.465256324587041	0.546951880045442	0.480941984675261	0.683737433367826	0.363720167464419
ENSMUSG00000032393	2498.0656913158	3124.60798572097	2970.28371719096	3333.65435324941	3031.32701043049	3228.21132027394	2591.45393134892	2787.64937953334	2735.74999385839	2762.55783139447	2819.29294310408	2531.99161205471	3031.02501303026	2704.78261521565	0.164727043057598	0.017017691839656	0.350686668182159	Dpp8	9	64939696	64989933	+	13707	protein_coding	dipeptidylpeptidase 8 [Source:MGI Symbol;Acc:MGI:1921638]	-	2378	2977	2792	4065	3557	3119	2448	3027	2513	2670	2472	2939	16.3656188696393	20.5810564379216	19.3887873746655	21.5775442908416	19.86886335324	21.0555305938133	17.0339413387875	18.4584043723432	18.0757625691421	18.0552802668628	18.377646736789
ENSMUSG00000108967	0	1.04958279668155	0	3.28034868708429	1.70442901907815	10.3501485100159	0	0	0	0	0	0	2.73075150214331	0	3.87450533981667	0.0171431117772047	0.352887229170329	Gm45181	7	144716733	144720694	+	449	lncRNA	predicted gene 45181 [Source:MGI Symbol;Acc:MGI:5753757]	-	0	1	0	4	2	10	0	0	0	0	0	0	0	0.211049778513213	0	0.648182840850797	0.341047778661432	2.06085239365166	0	0	0	0	0
ENSMUSG00000110496	12.6058823783808	27.2891527137203	9.57469679610267	34.443661214385	34.088580381563	33.1204752320507	2.11720092430468	4.60464053441252	5.44319537178351	19.6586512346423	25.0907948010881	11.1996906963971	25.1870747860337	11.352362260438	1.1633318611667	0.0171674193838801	0.353003896082433	Gm45909	8	93916956	93917986	-	1031	TEC	predicted gene 45909 [Source:MGI Symbol;Acc:MGI:5805024]	-	12	26	9	42	40	32	2	5	5	19	22	13	1.09795761753748	2.38971398095368	0.830924359504662	2.96397478486041	2.97052284420917	2.87200069757391	0.185019488924042	0.405354955628423	0.478143098246501	1.70816697571532	2.17444216507745
ENSMUSG00000025262	213.249510234275	223.56113569317	186.174659924219	244.385977187779	229.245703066011	238.053415730365	155.614267936394	169.450771666381	164.384500227862	218.314495289975	208.709793118142	190.394741838751	222.445066972636	184.478095012917	0.272422399606711	0.0173710556339019	0.356803743595266	Fam120c	X	150127171	150254838	+	5823	protein_coding	family with sequence similarity 120, member C [Source:MGI Symbol;Acc:MGI:2387687]	-	203	213	175	298	269	230	147	184	151	211	183	221	3.28860901664766	3.46628330202097	2.86067753474972	3.72351710765578	3.53701629353481	3.65488969075059	2.40777938200764	2.64116285428591	2.55668197417529	3.35869873608366	3.20249267490717
ENSMUSG00000042851	204.845588648688	244.552791626801	270.219220690009	244.385977187779	219.871343461081	279.454009770428	170.434674406526	119.720653894726	132.813967071518	199.690509909787	143.701824769868	306.699222147491	243.888155230798	178.843475366653	0.443926210920757	0.0174123326027681	0.357264089741303	Zc3h6	2	128809322	128860483	+	5668	protein_coding	zinc finger CCCH type containing 6 [Source:MGI Symbol;Acc:MGI:1926001]	-	195	233	254	298	258	270	161	130	122	193	126	356	3.24539651284731	3.89544719102272	4.26561369326676	3.82534229320388	3.48514968028384	4.40785348769215	2.70920695006974	1.91706862042617	2.1221522647721	3.1561879185897	2.26529386585417
ENSMUSG00000053399	6.3029411891904	7.34707957677084	10.6385519956696	5.7406102023975	5.96550156677352	10.3501485100159	2.11720092430468	0.920928106882504	2.17727814871341	6.20799512672914	4.56196269110693	1.72302933790725	7.72413884013629	2.95139905594065	1.40562154048383	0.017586962059227	0.359240067093805	Adamts18	8	114423758	114575370	-	10178	protein_coding	a disintegrin-like and metallopeptidase (reprolysin type) with thrombospondin type 1 motif, 18 [Source:MGI Symbol;Acc:MGI:2442600]	-	6	7	10	7	7	10	2	1	2	6	4	2	0.0556098596817225	0.0651728683304213	0.093522304605719	0.0500402502651321	0.0526583399652624	0.0909140032176848	0.0187419034270669	0.0082122412900944	0.0193737682960166	0.0546416983575255	0.0400480514513452
ENSMUSG00000086430	6.3029411891904	15.7437419502232	10.6385519956696	27.8829638402164	17.0442901907815	15.5252227650238	6.35160277291403	0	5.44319537178351	14.485321962368	9.12392538221386	4.30757334476813	15.5229519885175	6.61860313900792	1.25592356992013	0.0175992459279463	0.359240067093805	4930551O13Rik	2	5042091	5045944	+	1065	lncRNA	RIKEN cDNA 4930551O13 gene [Source:MGI Symbol;Acc:MGI:1922513]	-	6	15	10	34	20	15	6	0	5	14	8	5	0.531452724732931	1.33466690918919	0.893774663170899	2.3228073353118	1.43784462553036	1.30327144330929	0.537338290368132	0	0.462878435955063	1.2184671177403	0.765463037881299
ENSMUSG00000025648	1055.74264918939	1280.49101195149	1185.1346923176	1540.94379575784	1147.93294434913	1392.09497459713	1089.29987555476	1003.81163650193	1320.51919719468	1078.12182034196	1021.87964280795	934.743415814685	1267.0566780271	1074.72926470266	0.238526967923542	0.0176034841199203	0.359240067093805	Pfkfb4	9	108820846	108861296	+	4875	protein_coding	6-phosphofructo-2-kinase/fructose-2,6-biphosphatase 4 [Source:MGI Symbol;Acc:MGI:2687284]	-	1005	1220	1114	1879	1347	1345	1029	1090	1213	1042	896	1085	19.4470816273427	23.7146354203011	21.7514502181043	28.0437469499196	21.1555609925918	25.5294167136042	20.1319990543617	18.6885680240273	24.5319874090818	19.8120075394864	18.729114083791
ENSMUSG00000028271	156.523039531562	144.842425942054	147.875872739808	180.419177789636	149.137539169338	205.967955349315	121.739053147519	108.669516612136	146.966275038155	132.437229370222	130.015936696547	153.349611073746	164.127668420285	132.196270323054	0.312335400612466	0.0176869141753103	0.360166430808631	Gtf2b	3	142470806	142489367	+	4589	protein_coding	general transcription factor IIB [Source:MGI Symbol;Acc:MGI:2385191]	-	149	138	139	220	175	199	115	118	135	128	114	178	3.06288863311706	2.84965490874607	2.88319747793646	3.48809659071921	2.91978962827653	4.01262197047656	2.39015424975801	2.1492557503527	2.9004291623203	2.58539733976213	2.53145749153325
ENSMUSG00000067736	350.863726198266	309.626925021057	312.773428672687	448.587682958776	683.476036650338	370.535316658567	330.28334419153	348.110824401587	300.46438452245	261.770461177079	287.403649539737	355.805558277848	412.643852693282	313.973037018372	0.39562358722183	0.0177105527496352	0.360260416726735	Gm10222	1	24651488	24651781	-	294	unprocessed_pseudogene	predicted gene 10222 [Source:MGI Symbol;Acc:MGI:3642643]	-	334	295	294	547	802	358	312	378	276	253	252	413	107.167261176163	95.0836680713184	95.1870016277008	135.370450902618	208.861603742218	112.6753521974	101.216988165262	107.465389522175	92.5567941936267	79.7643033380796	87.3448002153839
ENSMUSG00000120167	7.35343138738881	6.2974967800893	3.19156559870089	30.3432253555297	4.26107254769537	7.2451039570111	5.29300231076169	2.76278432064751	5.44319537178351	3.10399756336457	0	2.58454400686088	9.78198260440252	3.19792059556969	1.62946517141194	0.0177415063263665	0.360410145392396	ENSMUSG00000120167	19	5456436	5456657	-	222	lncRNA	novel transcript	-	7	6	3	37	5	7	5	3	5	3	0	3	2.97445950666967	2.56111758249818	1.28631083280677	12.1264206475837	1.72444203399756	2.91768426722845	2.14814294009783	1.12951610608893	2.22056546978443	1.25257478802454	0
ENSMUSG00000047731	2117.78823956798	2759.35317247579	2751.12954608017	3014.64044343046	2468.01321962516	4414.33833952176	1430.16922436781	1456.90826508812	2999.20064985272	2320.75551154224	1254.53974005441	1952.19223984892	2920.87716011689	1902.29427179237	0.618662942448048	0.0177559755861815	0.360410145392396	Wbp1l	19	46587523	46645828	+	4463	protein_coding	WW domain binding protein 1 like [Source:MGI Symbol;Acc:MGI:107577]	-	2016	2629	2586	3676	2896	4265	1351	1582	2755	2243	1100	2266	42.6114817428707	55.8206566440388	55.1542877457392	59.928374143649	49.6824771212833	88.4270988361422	28.8718497369491	29.6280957892939	60.8613061606477	46.5841067591057	25.1159519627476
ENSMUSG00000039703	1953.91176864903	2258.70217845869	2016.0056031794	2298.70434247431	1990.77309428328	2163.18103859331	1758.33536763503	1859.35384779578	1703.72015136824	1929.65181855831	2042.61879494313	2050.40491210963	2113.54633760634	1890.68081540169	0.16071027834559	0.0178145752584258	0.360756352356333	Nploc4	11	120271196	120328534	-	4776	protein_coding	NPL4 homolog, ubiquitin recognition factor [Source:MGI Symbol;Acc:MGI:2679787]	-	1860	2152	1895	2803	2336	2090	1661	2019	1565	1865	1791	2380	36.737671078429	42.6981629792368	37.7678743895505	42.7014536120314	37.4489884126826	40.4925564222499	33.1704574546714	35.3342720574377	32.3069958612732	36.1951102377024	38.2133500942305
ENSMUSG00000036528	251.067157369418	180.528241029226	178.72767352725	263.247982138514	234.358990123246	210.108014753322	165.141672095765	141.822928459906	154.586748558652	242.111809942437	139.139862078761	187.810197831891	219.673009823496	171.768869827902	0.356052848694449	0.0178747291576136	0.361271740434244	Ppfibp2	7	107194414	107347790	+	10876	protein_coding	PTPRF interacting protein, binding protein 2 (liprin beta 2) [Source:MGI Symbol;Acc:MGI:894649]	-	239	172	168	321	275	203	156	154	142	234	122	218	2.07296370126726	1.49861643021501	1.47033985596301	2.14743344678615	1.93595414077879	1.72711027146164	1.36804866313843	1.1835201861888	1.28725829109018	1.99426122006555	1.14307434387547
ENSMUSG00000046791	45.1710785225312	47.2312258506697	76.5975743688214	62.3266250546015	35.7930094006411	52.7857574010808	38.1096166374842	44.2045491303602	31.5705331563444	39.3173024692846	35.3552108560787	34.4605867581451	53.3175450997243	37.1696331679495	0.516367893528459	0.0179181722088148	0.361763694339589	Riox1	12	83997382	83999725	+	2344	protein_coding	ribosomal oxygenase 1 [Source:MGI Symbol;Acc:MGI:1919202]	-	43	45	72	76	42	51	36	48	29	38	31	40	1.73050892556489	1.8192238800595	2.92383281450275	2.35906476761867	1.37190251919737	2.01328749838863	1.46484286495408	1.71162167612111	1.21979526403346	1.50266224570179	1.34768356418788
ENSMUSG00000032218	9.45441178378561	0	5.31927599783482	6.56069737416857	11.931003133547	10.3501485100159	0	0	0	6.20799512672914	0	2.58454400686088	7.26925613322532	1.46542318893167	2.29447930011884	0.0179464989185523	0.361949730052761	Ccnb2	9	70314974	70328829	-	1531	protein_coding	cyclin B2 [Source:MGI Symbol;Acc:MGI:88311]	-	9	0	5	8	14	10	0	0	0	6	0	3	0.554536726166464	0	0.310865452735796	0.380188237154811	0.70013923470469	0.604391067765902	0	0	0	0.363254869943106	0
ENSMUSG00000055436	1273.19412021646	1303.58183347848	1277.69009467992	1251.45302412266	1121.51429455342	1302.04868255999	1114.70628664641	1004.73256460881	984.129723218459	1229.18303509237	1113.11889663009	1231.10446193473	1254.91367493516	1112.82916135515	0.172432877995263	0.0180637655856335	0.362607720390016	Srsf11	3	157716110	157742276	-	8446	protein_coding	serine and arginine-rich splicing factor 11 [Source:MGI Symbol;Acc:MGI:1916457]	-	1212	1242	1201	1526	1316	1258	1053	1091	904	1188	976	1429	13.5367540459147	13.9348327475872	13.5353527059991	13.1458095488132	11.9298884469916	13.7823346878403	11.8911385871397	10.7968687318238	10.5527076249135	13.0376929629189	11.7755875576506
ENSMUSG00000035798	541.002452072176	547.882219867769	505.331219794308	632.287209435496	603.367872753665	644.814252173988	450.963796876896	502.826746357847	523.635394765574	584.586207766994	444.791362382926	494.509419979382	579.114204349567	500.218821354936	0.212088253485606	0.0180645601298744	0.362607720390016	Zdhhc17	10	110777641	110846001	-	7048	protein_coding	zinc finger, DHHC domain containing 17 [Source:MGI Symbol;Acc:MGI:2445110]	-	515	522	475	771	708	623	426	546	481	565	390	574	6.89293731550071	7.01836336384361	6.41512851492024	7.95925396080052	7.69128550328036	8.17928571962256	5.76487440780169	6.4751658272442	6.72861583412374	7.43049828139982	5.63874632491483
ENSMUSG00000034974	522.093628504605	604.559690888572	638.313119740178	508.454046498064	570.98372139118	610.658762090935	552.589441243521	510.194171212907	490.976222534873	488.362283302693	524.625709477297	463.494891897051	575.843828185589	505.040453278057	0.188840071494027	0.0181141052655064	0.362607720390016	Dapk3	10	81018839	81029031	+	2532	protein_coding	death-associated protein kinase 3 [Source:MGI Symbol;Acc:MGI:1203520]	-	497	576	600	620	670	590	522	554	451	472	460	538	18.5163628531309	21.5570844858614	22.5561615231518	17.8160682500044	20.2601507217059	21.5616274724432	19.6631434810661	18.2881683590923	17.5614104238354	17.2788041848819	18.5130500719811
ENSMUSG00000115868	52.52450990992	39.8841462738989	37.2349319848437	36.9039227296982	34.088580381563	42.435608891065	29.6408129402655	23.9441307789451	23.9500596358475	39.3173024692846	30.7932481649718	15.5072640411653	40.5119500284981	27.1921363384133	0.581034461037275	0.018118445276335	0.362607720390016	Gm2999	15	71666419	71666956	+	428	processed_pseudogene	predicted gene 2999 [Source:MGI Symbol;Acc:MGI:3781177]	-	50	38	35	45	40	41	28	26	22	38	27	18	11.0201937663663	8.41339093689822	7.78398377796619	7.64984480104577	7.15562862705528	8.86407283054519	6.23965257740565	5.07754436475491	5.06786997870427	8.22953342038551	6.42841403454344
ENSMUSG00000042594	528.396569693796	610.857187668662	600.014332555768	595.383286705798	537.747355519156	828.011880801268	576.937251873024	584.78934787039	518.192199393791	494.570278429422	429.964983636828	466.079435903912	616.735102157408	511.755582851228	0.268261067810717	0.0181356837482314	0.362607720390016	Sh2b3	5	121953551	121975709	-	4807	protein_coding	SH2B adaptor protein 3 [Source:MGI Symbol;Acc:MGI:893598]	-	503	582	564	726	631	800	545	635	476	478	377	541	9.87090241230869	11.4730821763087	11.1681857536974	10.9887015479248	10.0504800918014	15.3995876804593	10.8135558278525	11.0413900197876	9.76291218319367	9.21699093031078	7.99191899897366
ENSMUSG00000022180	453.811765621709	626.600929618885	467.032432609897	650.32912721446	412.471822616912	1158.18161827077	280.52912247037	319.562053088229	692.374451290863	355.925053932471	244.065003974221	330.821632878193	628.071282658773	370.546219605724	0.761332038659217	0.0182118586012073	0.362666854037501	Slc7a8	14	54959666	55019403	-	5005	protein_coding	solute carrier family 7 (cationic amino acid transporter, y+ system), member 8 [Source:MGI Symbol;Acc:MGI:1355323]	-	432	597	439	793	484	1119	265	347	636	344	214	384	8.14221676973449	11.3032020539065	8.34906967323889	11.5279739143263	7.40410979696181	20.6880345453506	5.04996000663157	5.79494796646384	12.5285146777144	6.37073802276776	4.35705996412405
ENSMUSG00000048495	55.6759805045152	43.0328946639435	42.5542079826785	36.9039227296982	41.7585109674147	25.8753712750396	14.8204064701327	30.3906275271226	32.6591722307011	24.8319805069166	31.9337388377485	28.4299840754697	40.966814687215	27.1776516080152	0.58979459233041	0.0182319709009093	0.362685992564517	Tyw5	1	57427396	57446260	-	2808	protein_coding	tRNA-yW synthesizing protein 5 [Source:MGI Symbol;Acc:MGI:1915986]	-	53	41	40	45	49	25	14	33	30	24	28	33	1.78049911250892	1.3836237082086	1.35594019412679	1.16600198534458	1.33607410582802	0.823827212205837	0.475529078192596	0.98229285294486	1.05334515874389	0.792226789006972	1.01611947069179
ENSMUSG00000022146	184.886274882919	155.338253908869	221.281881509928	179.599090617865	186.634977589057	229.773296922352	176.786277179441	156.557778170026	163.295861153505	148.991883041499	128.875446023771	169.718389783864	192.918962571832	157.370939225351	0.290702897352571	0.018284346708102	0.362725365335751	Osmr	15	6843058	6904450	-	12113	protein_coding	oncostatin M receptor [Source:MGI Symbol;Acc:MGI:1330819]	-	176	148	208	219	219	222	167	170	150	144	113	197	1.3706417172176	1.15782051364319	1.63451633274678	1.31545585164079	1.38428007609829	1.6958775274037	1.31495502949206	1.17306304091462	1.2209168685515	1.10191009173528	0.950627933767697
ENSMUSG00000021508	413.89313809017	306.478176631012	356.391491854933	487.131780032017	477.240125341882	368.465286956564	273.118919235303	359.161961684177	395.175983991483	376.618371021568	238.362550610337	264.485003368763	401.599999817763	317.820464985272	0.339265814067512	0.0183592190433554	0.363202748853363	Cxcl14	13	56436456	56444364	-	1827	protein_coding	chemokine (C-X-C motif) ligand 14 [Source:MGI Symbol;Acc:MGI:1888514]	-	394	292	335	594	560	356	258	390	363	364	209	307	20.3432656290079	15.1452185885661	17.4535553066665	23.6554806721337	23.4682686006104	18.0303716481038	13.4687504145641	17.8422741224557	19.5891066171919	18.4670796334039	11.6571285089497
ENSMUSG00000105607	5.252450990992	11.545410763497	2.12771039913393	9.84104606125286	0.852214509539075	7.2451039570111	0	0	0	6.20799512672914	0	0.861514668953626	6.14398944690433	1.17825163261379	2.38111101111644	0.0183730189777971	0.363202748853363	Gm43513	5	100962076	100963151	-	1076	TEC	predicted gene 43513 [Source:MGI Symbol;Acc:MGI:5663650]	-	5	11	2	12	1	7	0	0	0	6	0	1	0.438349714870331	0.96874986624234	0.176927512319146	0.811433351882922	0.0711572735218322	0.601975750301782	0	0	0	0.516861715504549	0
ENSMUSG00000079018	919.178923423601	894.24454277268	1155.34674672972	970.983211376949	788.298421323644	826.976865950267	779.129940144121	593.998628939215	808.85883224703	883.604639704448	682.013422320486	886.498594353282	925.838118596144	772.350676284764	0.261003780535156	0.01841445554846	0.363642293197847	Ly6c1	15	74915867	74920679	-	1677	protein_coding	lymphocyte antigen 6 complex, locus C1 [Source:MGI Symbol;Acc:MGI:96882]	-	875	852	1086	1184	925	799	736	645	743	854	598	1029	49.2195893321904	48.1435126241339	61.6416718948617	51.369166535739	42.2318630508525	44.0866342918859	41.8591975275449	32.1477660963772	43.6819787691189	47.2019775217643	36.3372424668652
ENSMUSG00000005580	849.846570342506	898.442873959406	821.296214065696	1032.48974925978	986.864402046248	1087.80060840267	779.129940144121	780.026106529481	639.031136647385	845.322003089618	872.4753646742	931.29735713887	946.123403012717	807.880318037279	0.22794709141812	0.0187167209431667	0.366789547228691	Adcy9	16	4105393	4238362	-	5197	protein_coding	adenylate cyclase 9 [Source:MGI Symbol;Acc:MGI:108450]	-	809	856	772	1259	1158	1051	736	847	587	817	765	1081	14.6844877121103	15.6081808876048	14.1397662606475	17.6261269139594	17.0603294335946	18.7129917974182	13.5073839241279	13.6224380406854	11.1360696028281	14.5715155925317	15.0000450629652
ENSMUSG00000047123	76.6857844684833	69.2724645809822	62.7674567744509	95.9501990972154	53.6895141009617	83.8362029311284	41.2854180239412	36.8371242753002	78.3820133536826	31.0399756336457	55.8840429660599	62.0290561646611	73.700270325537	50.9096050695484	0.536272478460919	0.0188323513423723	0.367372113742161	Ticam1	17	56576319	56583786	-	2992	protein_coding	toll-like receptor adaptor molecule 1 [Source:MGI Symbol;Acc:MGI:2147032]	-	73	66	59	117	63	81	39	40	72	30	49	72	2.30157041468147	2.09032390924484	1.87701640910239	2.84516955033547	1.61216886948461	2.50505149414162	1.24322336733736	1.11743571992755	2.37256139498892	0.929383699670613	1.66885397024714
ENSMUSG00000033105	105.04901981984	85.0162065312055	79.7891399675223	100.050634956071	66.4727317440478	72.451039570111	84.6880369721871	65.3858955886578	55.5205927921918	52.7679585771977	65.0079683482737	59.4445121578002	84.8047954314662	63.8024940727181	0.411363265819933	0.0188361137629971	0.367372113742161	Lss	10	76367422	76392972	+	10787	protein_coding	lanosterol synthase [Source:MGI Symbol;Acc:MGI:1336155]	-	100	81	75	122	78	70	80	71	51	51	57	69	0.874505039770976	0.711566644548719	0.661817476784793	0.822892362476244	0.553637494404407	0.600468997241788	0.707351786708768	0.550150887307985	0.466139654192996	0.438232803374859	0.538465672969596
ENSMUSG00000084271	3.1514705945952	7.34707957677084	5.31927599783482	3.28034868708429	5.11328705723445	3.10504455300476	0	0.920928106882504	2.17727814871341	2.06933170890971	0	1.72302933790725	4.55275107775406	1.14842788373548	1.96115475424504	0.0189317767661806	0.368292525034392	Gm14846	X	73322260	73322475	+	216	processed_pseudogene	predicted gene 14846 [Source:MGI Symbol;Acc:MGI:3705595]	-	3	7	5	4	6	3	0	1	2	2	0	2	1.31017859222354	3.07096969382883	2.20340281545604	1.34738007195374	2.12681184193032	1.28517045104111	0	0.386963851160096	0.912899137578042	0.858245688090887	0
ENSMUSG00000099478	71.4333334774913	75.5699613610715	70.2144431714196	41.0043585885536	59.6550156677352	65.2059356130999	65.633228653445	37.7580523821827	37.0137285281279	42.4213000326491	41.0576642199624	48.2448214614031	63.8471746465618	45.3547992129617	0.486946328256983	0.0189683951697628	0.368292525034392	Gm28370	12	81538973	81543789	+	3375	lncRNA	predicted gene 28370 [Source:MGI Symbol;Acc:MGI:5579076]	-	68	72	66	50	70	63	62	41	34	41	36	56	1.90063241111895	2.02157547845189	1.86143469849726	1.07790405756299	1.5880195086413	1.72726908619925	1.75212085496335	1.01539314544409	0.993234261684909	1.12601834277524	1.08695751379144
ENSMUSG00000054000	9.45441178378561	18.8924903402679	31.9156559870089	22.96244080959	15.3398611717033	32.0854603810491	10.5860046215234	4.60464053441252	20.6841424127774	15.5199878168229	9.12392538221386	7.75363202058264	21.7750534122341	11.3787221313888	0.946325821860431	0.0189716837769061	0.368292525034392	Tusc1	4	93222375	93223748	-	1374	protein_coding	tumor suppressor candidate 1 [Source:MGI Symbol;Acc:MGI:2684283]	-	9	18	30	28	18	31	10	5	19	15	8	9	0.61790082078665	1.24141507273929	2.0783188128319	1.48270645472639	1.00303789925098	2.08770047068686	0.694159727367856	0.304163725802696	1.36336901769297	1.01190539643904	0.593317420191837
ENSMUSG00000053647	37.8176471351424	29.3883183070834	52.1289047787812	51.6654918215775	34.088580381563	32.0854603810491	26.4650115538085	38.6789804890652	26.1273377845609	19.6586512346423	22.8098134555346	23.2608960617479	39.5290671341994	26.1667817632266	0.593407363728966	0.0189926179923432	0.368292525034392	Gper1	5	139408906	139413555	+	2537	protein_coding	G protein-coupled estrogen receptor 1 [Source:MGI Symbol;Acc:MGI:1924104]	-	36	28	49	63	40	31	25	42	24	19	20	27	1.33858214861783	1.04584856738987	1.83845608189095	1.80677453874128	1.20717739549849	1.13066631719501	0.939865456645087	1.38373514297375	0.932690013639055	0.694174281419984	0.803328868095766
ENSMUSG00000036395	98.7460786306497	66.1237161909376	96.8108231605937	71.3475839440832	123.571103883166	109.711574206168	80.4536351235777	75.5161047643654	82.7365696511094	64.1492829762011	42.1981548927391	66.3366295094292	94.3851466692663	68.5650628195703	0.459566403220231	0.018999989278625	0.368292525034392	Glb1l2	9	26674340	26717764	-	9043	protein_coding	galactosidase, beta 1-like 2 [Source:MGI Symbol;Acc:MGI:2388283]	-	94	63	91	87	145	106	76	82	76	62	37	77	0.980569358859775	0.660175283070137	0.957869860457898	0.699988010399057	1.22768526096166	1.08464236230739	0.80158061893908	0.757923668223778	0.828605122331147	0.63549852122709	0.416939497507915
ENSMUSG00000047264	785.766668252404	851.211648108736	818.104648466995	852.890658641915	738.869979770378	823.871821397262	759.016531363227	694.379792589408	752.249600380482	648.735490743195	751.583353359867	759.855938017099	811.785904106282	727.63678440888	0.157784905214264	0.019048661540622	0.368858437889876	Zfp358	8	3543138	3547208	+	2455	protein_coding	zinc finger protein 358 [Source:MGI Symbol;Acc:MGI:2153740]	zf-C2H2	748	811	769	1040	867	796	717	754	691	627	659	882	28.7417426732347	31.3040551112109	29.8162135444814	30.8223482040416	27.0395320612338	30.0023172668301	27.8556826352042	25.6710715500358	27.7506463703357	23.6728981730193	27.3538060688097
ENSMUSG00000102892	0	3.14874839004465	2.12771039913393	4.92052303062643	4.26107254769537	0	0	0	0	0	0	0	2.40967572791673	0	3.70668772107023	0.0191163456443615	0.369005357218818	Gm37854	3	49956421	49965232	+	1463	lncRNA	predicted gene, 37854 [Source:MGI Symbol;Acc:MGI:5611082]	-	0	3	2	6	5	0	0	0	0	0	0	0	0	0.194315824782842	0.130125771193029	0.298394493036919	0.261671996956567	0	0	0	0	0	0
ENSMUSG00000078495	55.6759805045152	82.9170409378424	50.0011943796473	49.2052303062643	76.6993058585167	37.2605346360571	40.2268175617889	47.8882615578902	29.393255007631	43.455965887104	36.4957015288554	45.6602774545422	58.6265477704738	40.5200464996353	0.52892766076791	0.019134123803083	0.369005357218818	Zfp984	4	147838431	147894245	-	2912	protein_coding	zinc finger protein 984 [Source:MGI Symbol;Acc:MGI:3651978]	zf-C2H2	53	79	47	60	90	36	38	52	27	42	32	53	1.71690985849074	2.57079213380569	1.53632866638116	1.49914540972875	2.36637031863126	1.14394292894868	1.24462457710613	1.49257485447466	0.914153119909879	1.33688270644927	1.11980513096646
ENSMUSG00000028943	12.6058823783808	13.6445763568601	13.8301175943705	14.7615690918793	13.6354321526252	4.14005940400634	8.46880369721871	10.1302091757075	1.0886390743567	1.03466585445486	3.4214720183302	6.03060268267538	12.1029394963537	5.0290654171239	1.24954747215619	0.0191450757752857	0.369005357218818	Espn	4	152204788	152236828	-	8272	protein_coding	espin [Source:MGI Symbol;Acc:MGI:1861630]	-	12	13	13	18	16	4	8	11	1	1	3	7	0.136846506731279	0.148923785926212	0.149592724995178	0.158323673832089	0.148095215298823	0.0447448126087812	0.0922413409481078	0.111149191290666	0.011918895896812	0.0112053353860996	0.0369568182729502
ENSMUSG00000026923	346.661765405472	240.354460440075	300.007166277884	295.231381837586	284.639646186051	332.239767171509	240.302304908581	222.864601865566	268.893851366106	291.77577095627	266.874817429755	212.794123231546	299.855697886429	250.584244959637	0.260989271448896	0.0194356551075552	0.372920401648309	Notch1	2	26347915	26406675	-	14232	protein_coding	notch 1 [Source:MGI Symbol;Acc:MGI:97363]	-	330	229	282	360	334	321	227	242	247	282	234	247	2.18731333271722	1.52475753769724	1.88608308452864	1.8404348369014	1.79685115144534	2.08704746096557	1.52126918666793	1.42126014810572	1.71110858586508	1.83661682662283	1.67545885741989
ENSMUSG00000087055	5.252450990992	2.0991655933631	2.12771039913393	2.46026151531322	0.852214509539075	0	0	0	0	0	0	0	2.13196716805689	0	3.51208135236803	0.0194719701842495	1	Gm11948	11	3303573	3304911	-	539	lncRNA	predicted gene 11948 [Source:MGI Symbol;Acc:MGI:3650068]	-	5	2	2	3	1	0	0	0	0	0	0	0	0.875072900186412	0.351619111511809	0.35319852180965	0.404963954835818	0.142050512633565	0	0	0	0	0	0
ENSMUSG00000050211	709.080883783921	851.211648108736	909.596195629754	832.388479347638	708.190257426971	951.178648070457	639.394679140012	550.715007915738	653.183444614022	863.945988469806	667.187043574388	778.809260734078	826.941018727913	692.205904074674	0.256000220053166	0.0195229783980404	0.374216766095231	Pla2g4e	2	119996893	120075816	-	6960	protein_coding	phospholipase A2, group IVE [Source:MGI Symbol;Acc:MGI:1919144]	-	675	811	855	1015	831	919	604	598	600	835	585	904	9.14866085949199	11.0418757612102	11.6932308034029	10.6106180666357	9.14162400333152	12.2179825293804	8.27701696988038	7.18151533428841	8.49940576365763	11.1202005965569	8.56506122801718
ENSMUSG00000041235	725.888726955095	660.187579112694	936.192575618928	1046.43123117989	1061.00706437615	1491.45640029328	352.513953896729	372.975883287414	449.607937709318	1046.04717885386	678.591950302156	720.226263245232	986.860596256006	603.327194549118	0.709971262834402	0.0195661064279731	0.374578418394216	Chd7	4	8690406	8867659	+	13786	protein_coding	chromodomain helicase DNA binding protein 7 [Source:MGI Symbol;Acc:MGI:2444748]	-	691	629	880	1276	1245	1441	333	405	413	1011	595	836	4.72827544757767	4.32358113285072	6.07605987468277	6.73435923965621	6.9145297225676	9.67205894649766	2.30383889438085	2.45550541850321	2.95364522940164	6.79748514371593	4.39807404730734
ENSMUSG00000026156	8.40392158558721	17.8429075435863	9.57469679610267	18.0419177789636	16.1920756812424	22.7703267220349	6.35160277291403	9.20928106882504	8.70911259485362	3.10399756336457	9.12392538221386	11.1996906963971	15.4709743512528	7.94960167976138	0.956428096205943	0.0196209626701374	0.374578418394216	B3gat2	1	23800834	23888239	+	6203	protein_coding	beta-1,3-glucuronyltransferase 2 (glucuronosyltransferase S) [Source:MGI Symbol;Acc:MGI:2389490]	-	8	17	9	22	19	22	6	10	8	3	8	13	0.121660949398801	0.259703846427753	0.138107853401468	0.258050544169119	0.234521892613306	0.328181524173644	0.0922562113883703	0.134748012011254	0.127155385276064	0.0448285672967028	0.131423204150183
ENSMUSG00000026110	159.674510126157	142.743260348691	132.98189994587	187.799962335575	139.763179564408	154.217212799236	127.032055458281	151.032209528731	91.445682245963	121.055904971218	85.5368004582549	138.703861701534	152.86333751999	119.134419060664	0.355715335269675	0.0199736273901164	0.377967401263592	Mgat4a	1	37478421	37580097	-	12881	protein_coding	mannoside acetylglucosaminyltransferase 4, isoenzyme A [Source:MGI Symbol;Acc:MGI:2662992]	-	152	136	125	229	164	149	120	164	84	117	75	161	1.11315849027983	1.00050800986964	0.923715177661874	1.29350997358745	0.974823159285506	1.07036011169699	0.888541695896376	1.06418814249633	0.642948604619827	0.841921629898024	0.593328935552061
ENSMUSG00000070565	209.047549441482	153.239088315506	226.601157507763	265.708243653827	228.393488556472	199.757866243306	139.735261004109	144.585712780553	180.714086343213	204.863839182062	173.354582262063	185.22565382503	213.791232286393	171.413189232838	0.32174630838246	0.0200196926588116	0.377967401263592	Rasal2	1	156962752	157240165	-	13740	protein_coding	RAS protein activator like 2 [Source:MGI Symbol;Acc:MGI:2443881]	-	199	146	213	324	268	193	132	157	166	198	152	215	1.36624737040604	1.00692555899965	1.47560635711065	1.71570318332625	1.49341198332924	1.29976190594376	0.91629084012557	0.955074099020465	1.19115398387912	1.33571512329953	1.12730309836449
ENSMUSG00000019842	66.1808824864992	67.1732989876191	81.9168503666562	60.6864507110593	92.0391670302201	100.396440547154	45.5198198725505	50.6510458785377	46.8114801973382	65.183948830656	61.5864963299435	74.0902615300119	78.0655150215346	57.3071754398397	0.441623508452259	0.0201881355530774	0.377967401263592	Traf3ip2	10	39488930	39531303	+	3687	protein_coding	TRAF3 interacting protein 2 [Source:MGI Symbol;Acc:MGI:2143599]	-	63	64	77	74	108	97	43	55	43	63	54	86	1.61187146577868	1.64489461224727	1.98790320730484	1.46030126594173	2.24275683249934	2.43439935722025	1.11235001389606	1.24684853587793	1.14985180225452	1.58380896711972	1.49246607365587
ENSMUSG00000024666	12.6058823783808	9.44624517013394	9.57469679610267	13.1213947483371	16.1920756812424	13.4551930630206	13.7618060079804	8.28835296194254	3.26591722307011	3.10399756336457	3.4214720183302	2.58454400686088	12.3992479728696	5.73768163025812	1.1191621603785	0.0202109654240121	0.377967401263592	Tmem138	19	10547842	10554726	-	2360	protein_coding	transmembrane protein 138 [Source:MGI Symbol;Acc:MGI:1920232]	-	12	9	9	16	19	13	13	9	3	3	3	3	0.479658603254721	0.361378031767751	0.363001277393774	0.493278128037302	0.616414957576414	0.509711670412913	0.525384790264604	0.318753274006452	0.125330220582748	0.117826950398918	0.129536779980442
ENSMUSG00000039205	433.85245185594	435.576860622843	481.926405403835	477.290733970764	484.057841418194	494.737098778758	435.084789944611	361.003817897942	446.342020486248	454.218310105682	372.940449997991	387.681601029132	467.906898675055	409.545164910268	0.193992387092007	0.0202243783969579	0.377967401263592	Ciz1	2	32242339	32270982	+	8604	protein_coding	CDKN1A interacting zinc finger protein 1 [Source:MGI Symbol;Acc:MGI:1920234]	-	413	415	453	582	568	478	411	392	410	439	327	450	4.5280649254253	4.57066021376796	5.01158899783222	4.92160168542099	5.05451517245364	5.14068180416442	4.55604040307777	3.80811287836212	4.69818384611293	4.72932874985648	3.87285463530555
ENSMUSG00000020859	4682.03481337027	5106.22030585574	4557.55567494487	5915.28876998474	5156.74999722094	5181.28434411394	4045.97096634624	4320.99467749271	4208.67866146301	5020.19872581497	4788.9203349895	4747.80734060344	5099.85565091508	4522.09511778498	0.173680028308176	0.0202483948386136	0.377967401263592	Spag9	11	93886917	94016911	+	11209	protein_coding	sperm associated antigen 9 [Source:MGI Symbol;Acc:MGI:1918084]	-	4457	4865	4284	7213	6051	5006	3822	4692	3866	4852	4199	5511	37.5092828047912	41.1289116279404	36.3797943592711	46.8201652945067	41.3325171200582	41.3254131510079	32.5214544452844	34.9876909771545	34.0049024100887	40.1226222223779	38.1735764821539
ENSMUSG00000031903	102.948039423443	91.3137033112948	111.704795954531	73.8078454593965	102.265741144689	75.5560841231157	70.9262309642067	72.7533204437179	76.2047352049692	81.7386025019337	61.5864963299435	68.9211735162901	92.9327015694117	72.0217598268435	0.364691013194637	0.0202575199219847	0.377967401263592	Pla2g15	8	106877031	106891347	+	3013	protein_coding	phospholipase A2, group XV [Source:MGI Symbol;Acc:MGI:2178076]	-	98	87	105	90	120	73	67	79	70	79	54	80	3.06824432350791	2.73622220314027	3.31717065081599	2.17333791891642	3.04939500734782	2.24190371412946	2.12090793833489	2.19155365290272	2.29057998011616	2.43031935306719	1.8263267220608
ENSMUSG00000026491	683.869119027159	765.145858780849	768.103454087348	853.710745813686	847.953436991379	926.338291646419	662.683889307364	640.965962390223	682.576699621653	740.820751789678	768.690713451518	746.933217982794	807.520151057807	707.111872423872	0.192573058494804	0.0203112604453018	0.378224828233161	Ahctf1	1	179572459	179631245	-	15116	protein_coding	AT hook containing transcription factor 1 [Source:MGI Symbol;Acc:MGI:1915033]	-	651	729	722	1041	995	895	626	696	627	716	674	867	4.06262840531238	4.57005984074645	4.54650801635353	5.01069220460489	5.03985182442075	5.47872346289288	3.94987722507641	3.84854442498043	4.08956589046273	4.39047516331649	4.54367080594714
ENSMUSG00000116180	32.5651961441504	34.6362322904911	42.5542079826785	28.7030510119875	32.3841513624848	32.0854603810491	17.9962078565898	17.4976340307676	16.3295861153505	23.7973146524617	30.7932481649718	28.4299840754697	33.8213831954736	22.4739958159352	0.585022795347764	0.0203537416880834	0.378362207847189	Gm49492	15	100498085	100500647	+	2563	lncRNA	predicted gene, 49492 [Source:MGI Symbol;Acc:MGI:6155169]	-	31	33	40	35	38	31	17	19	15	23	27	33	1.14097488015722	1.22010322599699	1.48555601447836	0.993581090906192	1.13518478336351	1.1191964286866	0.632625162382302	0.619625300492015	0.577017792772699	0.831791763253126	1.07349247240913
ENSMUSG00000060380	2.1009803963968	5.24791398340775	2.12771039913393	0.820087171771072	4.26107254769537	5.17507425500793	0	0	1.0886390743567	0	0	1.72302933790725	3.28880645890214	0.468611402043993	2.72039089992366	0.0204184555190367	0.379102657470115	C030014I23Rik	9	44379641	44393477	+	3313	lncRNA	RIKEN cDNA C030014I23 gene [Source:MGI Symbol;Acc:MGI:1924631]	-	2	5	2	1	5	5	0	0	1	0	0	2	0.0569470924479899	0.143014413752539	0.0574627235905227	0.0219615224526115	0.115552711001345	0.139650275392333	0	0	0.0297594647927644	0	0
ENSMUSG00000068184	84.0392158558721	95.512034498021	87.236126364491	96.7702862689865	92.8913815397591	105.571514802162	56.1058244940739	63.5440393748928	102.33207298953	60.0106195583817	78.6938564215945	72.3672321921046	93.6700932215486	72.1756075050963	0.379922088787002	0.0205564884156211	0.380966659677429	Ndufaf2	13	108139249	108295157	-	2978	protein_coding	NADH:ubiquinone oxidoreductase complex assembly factor 2 [Source:MGI Symbol;Acc:MGI:1922847]	-	80	91	82	118	109	102	53	69	94	58	69	84	2.53412649133902	2.89566249169623	2.62099870163582	2.88297710493258	2.80242097640516	3.16933908409868	1.69745129840101	1.93663842769982	3.11207254690808	1.80525553734094	2.36106662771605
ENSMUSG00000022385	9.45441178378561	3.14874839004465	5.31927599783482	0	5.96550156677352	10.3501485100159	3.17580138645702	0	2.17727814871341	2.06933170890971	0	0	5.70634770807574	1.23706854068002	2.23039594061943	0.0206194332120269	0.380966659677429	Gtse1	15	85743946	85760774	+	2742	protein_coding	G two S phase expressed protein 1 [Source:MGI Symbol;Acc:MGI:1352755]	-	9	3	5	0	7	10	3	0	2	2	0	0	0.309626450678649	0.103677626424981	0.173572213033736	0	0.195461919827294	0.337462700492194	0.104351801466459	0	0.0719132799842658	0.0676079754294791	0
ENSMUSG00000103906	52.52450990992	48.2808086473513	39.3626423839777	49.2052303062643	30.6797223434067	66.2409504641014	17.9962078565898	25.7859869927101	46.8114801973382	43.455965887104	20.5288321099812	31.0145280823305	47.7156440091702	30.9321668543423	0.622597279176187	0.0207008007234073	0.381725184128421	Tigd5	15	75781584	75786384	+	4801	protein_coding	tigger transposable element derived 5 [Source:MGI Symbol;Acc:MGI:2145902]	-	50	46	37	60	36	64	17	28	43	42	18	36	0.982429271402783	0.907940455199312	0.733580308315961	0.90929211271196	0.574119589073462	1.23350665244687	0.337725117930814	0.48747289560847	0.883045947700984	0.810873243320196	0.382053906378476
ENSMUSG00000083649	5.252450990992	19.9420731369494	18.0855383926384	15.5816562636504	9.37435960492982	6.21008910600951	7.41020323506637	1.84185621376501	6.53183444614022	1.03466585445486	3.4214720183302	10.3381760274435	12.4076945825283	5.09636796586669	1.27224967808885	0.0208236662983905	0.382464859829554	Rasl2-9	7	5127937	5128949	-	1013	protein_coding	RAS-like, family 2, locus 9 [Source:MGI Symbol;Acc:MGI:104605]	-	5	19	17	19	11	6	7	2	6	1	3	12	0.465611345706294	1.77735998074651	1.59741266305125	1.36467122786233	0.831409170191911	0.548068741213976	0.659074852697339	0.165023083614177	0.583967069250317	0.091501021040292	0.301783613774772
ENSMUSG00000048807	737.444119135277	893.194959975998	1006.40701879035	1069.39367198948	721.825689579596	1347.58933600406	502.835219522361	546.110367381325	951.470550987758	669.428807832293	459.617741129023	869.268300974209	962.64246591246	666.455164637828	0.530204067156894	0.020858472520364	0.382464859829554	Slc35e4	11	3857021	3864664	-	3063	protein_coding	solute carrier family 35, member E4 [Source:MGI Symbol;Acc:MGI:2144150]	-	702	851	946	1304	847	1302	475	593	874	647	403	1009	21.6198716178083	26.327753614143	29.3982708259239	30.9752253172362	21.1722973177079	39.3330129815205	14.7908372858841	16.1819868649672	28.1326723455	19.5790975191116	13.4073175213624
ENSMUSG00000027510	2670.34608382034	3586.42441626085	3136.24512832341	3320.53295850107	2477.38757923009	3832.65999325887	2672.96616693465	2658.71944456979	2907.75496760675	2749.10717528656	2583.2113738393	2792.1690420787	3170.5993598991	2727.32136171929	0.217071647977381	0.0208952298873812	0.382464859829554	Rbm38	2	172862291	172876527	+	2869	protein_coding	RNA binding motif protein 38 [Source:MGI Symbol;Acc:MGI:1889294]	-	2542	3417	2948	4049	2907	3703	2525	2887	2671	2657	2265	3241	83.5810828383137	112.861462125361	97.8080448931551	102.683605162913	77.5793352672331	119.430813863637	83.9415493253284	84.1085959820937	91.7888422512591	85.8413209033839	80.4491580931168
ENSMUSG00000020471	432.801961657741	450.271019776385	397.881844638044	371.499488812296	383.496529292584	407.795851294625	320.755940032159	350.873608722234	424.569238999114	339.370400261193	318.196897704708	357.528587615755	407.291115911946	351.882445555861	0.209138248304695	0.0209412270172856	0.382464859829554	Pold2	11	5822180	5828292	-	1896	protein_coding	polymerase (DNA directed), delta 2, regulatory subunit [Source:MGI Symbol;Acc:MGI:1097163]	-	412	429	374	453	450	394	303	381	390	328	279	415	20.4984903795987	21.441254950946	18.7763389286709	17.3837612447956	18.1721264975059	19.2287528244378	15.2422977857194	16.796190450987	20.2802276765755	16.0350713369892	14.995112062293
ENSMUSG00000099974	0	0	1.06385519956696	4.92052303062643	2.55664352861722	6.21008910600951	0	0	0	0	0	0	2.45851847747002	0	3.73107839234487	0.0209428693443472	0.382464859829554	Bcl2a1d	9	88605338	88613967	-	863	protein_coding	B cell leukemia/lymphoma 2 related protein A1d [Source:MGI Symbol;Acc:MGI:1278325]	-	0	0	1	6	3	6	0	0	0	0	0	0	0	0	0.110297800263848	0.505853004997696	0.266159535258951	0.643329820219881	0	0	0	0	0
ENSMUSG00000019893	21.009803963968	3.14874839004465	15.9578279935045	18.0419177789636	15.3398611717033	7.2451039570111	2.11720092430468	1.84185621376501	5.44319537178351	5.17332927227429	4.56196269110693	13.784234703258	13.4572105425325	5.48696319608207	1.27901776394408	0.0210122389601123	0.382993052383645	Ros1	10	51921817	52071340	-	7776	protein_coding	Ros1 proto-oncogene [Source:MGI Symbol;Acc:MGI:97999]	-	20	3	15	22	18	7	2	2	5	5	4	16	0.242625665226582	0.0365591630217718	0.183616901288003	0.205849733215155	0.17723432016086	0.0832980847897013	0.0245312619702529	0.0214979917311165	0.0633957734429196	0.0596003950063116	0.0524188615833066
ENSMUSG00000043795	4014.97353751429	4111.21581460163	4597.98217252842	4415.34933281545	4033.53127364844	4895.6202452375	3731.56662908699	3449.79668838186	3951.75983991483	3908.96759813045	4045.32041633907	4276.5588166858	4344.77872939095	3893.99499808983	0.157953169790545	0.0211102039191501	0.383837617599139	Prr33	7	142044811	142060508	-	2514	protein_coding	proline rich 33 [Source:MGI Symbol;Acc:MGI:3642289]	-	3822	3917	4322	5384	4733	4730	3525	3746	3630	3778	3547	4964	143.412961703438	147.64527053058	163.642888239826	155.820164120741	144.146068465721	174.096121243659	133.733433394873	124.545100506076	142.359975296776	139.29388967287	143.773803006349
ENSMUSG00000098900	25.2117647567616	41.983311867262	53.1927599783482	52.4855789933486	46.01958351511	40.3655791890618	31.7580138645702	19.3394902445326	23.9500596358475	37.2479707603749	34.214720183302	30.1530134133769	43.209763049982	29.4438780170007	0.56150814415945	0.0211644585431933	0.384079334957265	Gm18190	7	7268497	7281266	-	1397	transcribed_unprocessed_pseudogene	predicted gene, 18190 [Source:MGI Symbol;Acc:MGI:5010375]	-	24	40	50	64	54	39	30	21	22	36	30	35	1.62060744979405	2.71328133292577	3.40683613556553	3.33324662038091	2.95957209786152	2.58322020509909	2.04819355491074	1.25645528193429	1.55264735210124	2.38858928797235	2.18830923946918
ENSMUSG00000057637	808.877452612769	951.971596590165	856.403435651406	1004.60678541956	1015.83969537058	991.544227259519	802.419150311472	898.825832317324	784.908772611183	811.178029892608	911.252047548609	770.194114044542	938.207198817333	829.79632445429	0.178513051368967	0.0213514259592444	0.386201819308663	Prdm2	4	142833961	142939565	-	7420	protein_coding	PR domain containing 2, with ZNF domain [Source:MGI Symbol;Acc:MGI:107628]	zf-C2H2	770	907	805	1225	1192	958	758	976	721	784	799	894	9.78925891548158	11.5833618532421	10.3268916860241	12.0120204527951	12.2999662750558	11.9468890877374	9.74342052258495	10.9943627016397	9.5802735909605	9.79371683315789	10.9730338635364
ENSMUSG00000042460	570.416177621732	587.766366141668	615.972160549272	578.981543270377	577.801437467493	544.417811626834	576.937251873024	514.79881174732	456.139772155459	505.951602828425	529.187672168404	517.770316041129	579.225916112896	516.797571135627	0.164339696420546	0.0214878978124662	0.388122822201114	C1galt1	6	7844842	7875687	+	6092	protein_coding	core 1 synthase, glycoprotein-N-acetylgalactosamine 3-beta-galactosyltransferase, 1 [Source:MGI Symbol;Acc:MGI:2151071]	-	543	560	579	706	678	526	545	559	419	489	464	601	8.40819800419759	8.71082670869374	9.04682763336158	8.43196287970526	8.52121198913907	7.98949036799552	8.53262686547721	7.66965910119413	6.78110830165488	7.4401955481707	7.76143333058566
ENSMUSG00000045975	4183.05196922603	4588.77598709173	4156.48226470813	4750.76498606982	5541.9509555326	4964.9662402546	3997.27534508723	4271.26455972106	4428.58375448307	4337.31926187476	4227.79892398335	3772.57273534793	4697.66540048049	4172.46909674957	0.171429694495959	0.0214986186761521	0.388122822201114	C2cd2	16	97656409	97763798	-	7767	protein_coding	C2 calcium-dependent domain containing 2 [Source:MGI Symbol;Acc:MGI:1891883]	-	3982	4372	3907	5793	6503	4797	3776	4638	4068	4192	3707	4379	48.3627453463189	53.3406237434318	47.8815006256504	54.266786258364	64.1050169551465	57.1491323628661	46.3686900651908	49.9116108926218	51.638568134426	50.0268726462618	48.6354710267585
ENSMUSG00000111681	12.6058823783808	16.7933247469048	19.1493935922053	21.3222664660479	18.7487192098596	17.5952524670269	10.5860046215234	15.6557778170026	6.53183444614022	11.3813243990034	11.4049067277673	4.30757334476813	17.7024731434042	9.97790355936751	0.835949454070058	0.0215825455055383	0.389266901698937	Gm47640	9	37180583	37183464	+	2882	TEC	predicted gene, 47640 [Source:MGI Symbol;Acc:MGI:6096715]	-	12	16	18	26	22	17	10	17	6	11	10	5	0.392780813213443	0.526086609590188	0.594505908847541	0.656391957329303	0.584467376408332	0.545818401136125	0.330942215615349	0.493036523754293	0.205259764451968	0.353780665319908	0.353581772789549
ENSMUSG00000068392	34.6661765405472	32.537066697128	37.2349319848437	27.0628766684454	47.7240125341882	55.8908019540856	13.7618060079804	16.5767059238851	16.3295861153505	49.6639610138331	27.3717761466416	18.0918080480262	39.185977729873	23.6326072092861	0.732953976172302	0.0218602562418118	0.39315245271361	Rnase13	14	52158819	52160230	-	1412	protein_coding	ribonuclease, RNase A family, 13 (non-active) [Source:MGI Symbol;Acc:MGI:3528592]	-	33	31	35	33	56	54	13	18	15	48	24	21	2.20466312685775	2.08045458011715	2.35945117349117	1.70044708797561	3.03658121340759	3.53876962722933	0.878121887411094	1.06552085928502	1.04737719750455	3.1509530078351	1.73204986262801
ENSMUSG00000050777	123.957843387411	120.702021618378	154.25900393721	120.552814250348	82.6648074252902	153.182197948235	83.6294365100347	73.6742485506004	120.838937253594	112.778578135579	77.5533657488178	101.658730936528	125.886448094479	95.0222161891924	0.402645472450258	0.0220444104298771	0.395712838598116	Tmem37	1	119995107	120001804	-	1311	protein_coding	transmembrane protein 37 [Source:MGI Symbol;Acc:MGI:2157899]	-	118	115	145	147	97	148	79	80	111	109	68	118	8.49067682649217	8.31239917126602	10.5279292418128	8.15827842194416	5.66500911672057	10.4460536432449	5.7473883880146	5.10048462856328	8.34770012302484	7.70653565233098	5.28554855104535
ENSMUSG00000038145	1426.56568915343	1394.89553678978	1621.31532414005	1467.95603747022	1094.24343024817	1405.55016766015	949.564614550648	1065.51381966306	1104.96866047205	1407.14556205861	976.260015896883	1479.22068659338	1401.75436424363	1163.77889320577	0.267470500797846	0.0222051055447859	0.397843224983118	Snrk	9	121946332	121998768	+	5780	protein_coding	SNF related kinase [Source:MGI Symbol;Acc:MGI:108104]	-	1358	1329	1524	1790	1284	1358	897	1157	1015	1360	856	1717	22.1633256112888	21.7885527481285	25.0977492180997	22.5324840406658	17.008607367022	21.7402813185113	14.801671149946	16.7312993029623	17.3134954085303	21.8095374856037	15.0914083878483
ENSMUSG00000042616	37.8176471351424	29.3883183070834	26.5963799891741	28.7030510119875	37.4974384197193	26.9103861260412	35.9924157131795	11.9720653894726	10.886390743567	22.7626487980069	17.107360091651	18.0918080480262	31.1522034981913	19.4687814639838	0.683374469790281	0.0226821905525325	0.401448636940743	Oscp1	4	125952358	125985988	+	5254	protein_coding	organic solute carrier partner 1 [Source:MGI Symbol;Acc:MGI:1916308]	-	36	28	25	35	44	26	34	13	10	22	15	21	0.646361421972483	0.505009100774289	0.452926349579848	0.484687540158464	0.641200981655429	0.457906182784345	0.61721290109853	0.206812808157128	0.187653419981782	0.388121765303378	0.290927674870426
ENSMUSG00000028600	290.985784900957	289.684851884108	300.007166277884	287.030510119875	275.265286581121	260.823742452399	235.009302597819	222.864601865566	259.096099696895	304.191761209728	134.577899387654	204.178976542009	283.966223702724	226.653106883279	0.324565141840351	0.0227031096295034	0.401448636940743	Podn	4	107871988	107953642	-	4270	protein_coding	podocan [Source:MGI Symbol;Acc:MGI:2674939]	-	277	276	282	350	323	252	222	242	238	294	118	237	6.11948520920524	6.12508963758112	6.2863546742416	5.96381343323787	5.79170213067113	5.4609209985222	4.95873895361973	4.73709002993924	5.49535349702716	6.38197121504961	2.8160345424632
ENSMUSG00000031004	36.767156936944	9.44624517013394	26.5963799891741	18.0419177789636	34.088580381563	5.17507425500793	17.9962078565898	14.7348497101201	0	9.31199269009372	4.56196269110693	7.75363202058264	21.6858924186311	9.05977416141552	1.25373139639598	0.0228156898278335	0.40206059796936	Mki67	7	135291513	135318090	-	10061	protein_coding	antigen identified by monoclonal antibody Ki 67 [Source:MGI Symbol;Acc:MGI:106035]	-	35	9	25	22	40	5	17	16	0	9	4	9	0.328163209661399	0.0847681299047702	0.236524703378642	0.159098253203563	0.304404040590365	0.0459856239314976	0.161158760678445	0.13292387134572	0	0.0829156951420676	0.0405137727533835
ENSMUSG00000024778	87.1906864504673	55.6278882241221	91.4915471627589	93.4899375819022	81.8125929157512	109.711574206168	49.7542217211599	51.5719739854203	67.4956226101156	57.941287849472	37.6361922016322	99.9357015986207	86.5540377568616	60.7224999944034	0.504593543794376	0.0229743106047342	0.403980960290118	Fas	19	34268066	34305172	+	2062	protein_coding	Fas (TNF receptor superfamily member 6) [Source:MGI Symbol;Acc:MGI:95484]	-	83	53	86	114	96	106	47	56	62	56	33	116	3.79710342731712	2.43567001904895	3.96997193985561	4.02253720802484	3.56462741305101	4.7567511553568	2.17397899485749	2.26998775151917	2.96448720912831	2.51729870105416	1.63083162380809
ENSMUSG00000035403	5.252450990992	1.04958279668155	0	5.7406102023975	5.11328705723445	1.03501485100159	0	0	0	2.06933170890971	0	0	3.03182431638451	0.344888618151619	3.07790963819855	0.0230680823799908	0.404503096400246	Crb2	2	37666261	37689115	+	6698	protein_coding	crumbs family member 2 [Source:MGI Symbol;Acc:MGI:2679260]	-	5	1	0	7	6	1	0	0	0	2	0	0	0.0704186762019224	0.014147708353603	0	0.0760390664673804	0.068586347843677	0.0138149107905285	0	0	0	0.0276770780274159	0
ENSMUSG00000029167	613.486275747866	733.658374880403	628.738422944076	700.354444692495	680.067178612181	761.770930337167	453.080997801201	483.487256113315	779.465577239399	604.244859001637	492.691970639548	607.367841612307	686.345937869031	570.056417067901	0.268068346928618	0.0231569535150354	0.405685833180148	Ppargc1a	5	51611592	51725068	-	6592	protein_coding	peroxisome proliferative activated receptor, gamma, coactivator 1 alpha [Source:MGI Symbol;Acc:MGI:1342774]	-	584	699	591	854	798	736	428	525	716	584	432	705	8.35715859311523	10.0482682093675	8.53390745782329	9.42593740871036	9.26866665579099	10.3312731404081	6.19259555814123	6.65681139586695	10.7088386696958	8.21166141372397	6.67806118151601
ENSMUSG00000031750	118.705392396419	107.057445261518	88.299981564058	70.5274967723122	92.0391670302201	70.3810098681078	70.9262309642067	57.0975426267153	93.6229603946764	60.0106195583817	57.0245336388366	70.6442028541974	91.1684154821059	68.221015006169	0.416373938153406	0.0232303952062267	0.406394956426918	Il34	8	111468461	111532556	-	1959	protein_coding	interleukin 34 [Source:MGI Symbol;Acc:MGI:1923777]	-	113	102	83	86	108	68	67	62	86	58	50	82	5.44135427581968	4.93397537332727	4.03293575043347	3.19409548450902	4.22105382410673	3.21194207672141	3.26201920275805	2.64533940517407	4.32823235825669	2.74428330280823	2.60087460229576
ENSMUSG00000097537	5.252450990992	6.2974967800893	11.7024071952366	16.4017434354214	3.4088580381563	4.14005940400634	2.11720092430468	1.84185621376501	4.35455629742681	1.03466585445486	5.70245336388366	2.58454400686088	7.867169307317	2.93921277678265	1.44968236094974	0.0233650641431693	0.40707229507207	2610020C07Rik	16	11021193	11064068	+	3617	lncRNA	RIKEN cDNA 2610020C07 gene [Source:MGI Symbol;Acc:MGI:1917168]	-	5	6	11	20	4	4	2	2	4	1	5	3	0.13040207166173	0.15719328264158	0.289482172492316	0.402314204509273	0.0846726306989123	0.102330409151186	0.0527384830192665	0.0462174132433402	0.109033018367076	0.0256263572888625	0.140865727008499
ENSMUSG00000020914	33.6156863423488	2.0991655933631	14.8939727939375	13.1213947483371	34.088580381563	6.21008910600951	8.46880369721871	10.1302091757075	1.0886390743567	7.242660981184	6.84294403666039	8.61514668953626	17.3381481609265	7.06473394244394	1.29061822359789	0.0233967654511907	0.407249948634788	Top2a	11	98883769	98915015	-	9013	protein_coding	topoisomerase (DNA) II alpha [Source:MGI Symbol;Acc:MGI:98790]	-	32	2	14	16	40	6	8	11	1	7	6	10	0.334921943468662	0.0210277045495246	0.147855100719828	0.129161919690229	0.339799073824438	0.061599205020499	0.0846577579410571	0.102011107329012	0.0109389888892076	0.0719886541880295	0.067836858039242
ENSMUSG00000047419	54172.7290308933	59703.4182236366	55968.3581940184	64325.1774922075	65738.9750513347	60253.3895510573	50847.7559985633	56324.8839450409	54030.2458993975	55227.3593132369	58430.7586383703	53593.9660409361	60027.007923858	54742.4949725908	0.132984251660071	0.0236423733046655	0.410017642530911	Cmya5	13	93177221	93281232	-	11850	protein_coding	cardiomyopathy associated 5 [Source:MGI Symbol;Acc:MGI:1923719]	-	51569	56883	52609	78437	77139	58215	48033	61161	49631	53377	51233	62209	410.51908752836	454.878472867006	422.590123935165	481.600028523808	498.410547872393	454.579429715592	386.60503738163	431.400232723491	412.934555821997	417.514147685109	440.570366329724
ENSMUSG00000029505	455.912746018106	438.725609012888	430.86135582462	581.44180478569	580.35808099611	542.347781924831	381.096166374842	410.733935669597	342.921308422361	521.471590645248	471.02264785679	405.773409077158	504.941229760374	422.169843007666	0.260287261258373	0.0237964922451996	0.411123062936272	Ep400	5	110812239	110918583	-	13971	protein_coding	E1A binding protein p400 [Source:MGI Symbol;Acc:MGI:1276124]	-	434	418	405	709	681	524	360	446	315	504	413	471	2.93038870873963	2.83517604544534	2.75933975085669	3.69234796613134	3.73208210699046	3.47053974496305	2.45765634203161	2.66828069324737	2.2229495855991	3.34378564842625	3.01235675593104
ENSMUSG00000019899	536.800491279383	628.700095212248	521.289047787812	673.29156802405	689.441538217111	505.087247288774	412.854180239412	542.426654953795	484.444388088733	648.735490743195	443.650871710149	403.188865070297	592.43499796823	489.21674180093	0.277481146734415	0.0238203483823252	0.411123062936272	Lama2	10	26856032	27495754	-	16605	protein_coding	laminin, alpha 2 [Source:MGI Symbol;Acc:MGI:99912]	-	511	599	490	821	809	488	390	589	445	627	389	468	2.9029864959403	3.41837091122596	2.80889074360574	3.59739524902121	3.73027811408483	2.71940674301598	2.24012304430798	2.96483523035183	2.64221213803075	3.49996778167796	2.38723166703293
ENSMUSG00000032492	26.26225495496	28.3387355104018	37.2349319848437	25.4227023249032	28.1230788147895	19.6652821690301	25.4064110916561	10.1302091757075	14.1523079666371	15.5199878168229	13.6858880733208	24.1224107307015	27.5078309598214	17.169535809141	0.673923662351963	0.0239362701309975	0.412095530673482	Pth1r	9	110551153	110576213	-	2925	protein_coding	parathyroid hormone 1 receptor [Source:MGI Symbol;Acc:MGI:97801]	-	25	27	35	31	33	19	24	11	13	15	12	28	0.806263749060643	0.874720158945531	1.13898976306651	0.771115979641218	0.863812809645545	0.601064334025378	0.7825849972541	0.314333712942355	0.43819158603746	0.475336073404183	0.418060582227479
ENSMUSG00000028991	1105.11568850472	1014.94656439106	1017.04557078602	1318.70017220788	1043.96277418537	1070.20535593564	876.521182662136	947.635021982097	837.163448180304	1069.84449350632	926.078426294707	1078.61636552994	1094.99602100178	955.976489692585	0.195898788446958	0.0240191540195055	0.413102595149247	Mtor	4	148533068	148642140	+	10109	protein_coding	mechanistic target of rapamycin kinase [Source:MGI Symbol;Acc:MGI:1928394]	-	1052	967	956	1608	1225	1034	828	1029	769	1034	812	1252	9.81681346220003	9.06461825939285	9.00175819132278	11.573420358877	9.27810883659383	9.46467204858128	7.81210886689132	8.50807532043206	7.50005927135538	9.48085987540662	8.18524490428071
ENSMUSG00000036437	80.8877452612769	95.512034498021	53.1927599783482	105.791245158468	80.108163896673	93.1513365901427	55.0472240319216	87.4881701538379	70.7615398331857	41.3866341781943	35.3552108560787	68.0596588473365	84.773880897155	59.6830729834258	0.502410311553074	0.0240386121241946	0.413102595149247	Npy1r	8	67149844	67159444	+	3454	protein_coding	neuropeptide Y receptor Y1 [Source:MGI Symbol;Acc:MGI:104963]	-	77	91	50	129	94	90	52	95	65	40	31	79	2.10296181681741	2.49660767234261	1.37792416948032	2.71738551859576	2.0837091120707	2.41108990235853	1.43590979157437	2.29892826456432	1.85540010011519	1.07342830705056	0.914583171527616
ENSMUSG00000021903	530.497550090192	388.345634772173	489.373391800803	581.44180478569	447.412617508014	505.087247288774	454.139598263353	386.789804890652	416.948765478617	457.322307669047	382.064375380205	425.588246463091	490.359707707608	420.475516357494	0.222706941569157	0.024105943793098	0.413102595149247	Galnt15	14	31750946	31784154	+	6326	protein_coding	polypeptide N-acetylgalactosaminyltransferase 15 [Source:MGI Symbol;Acc:MGI:1926004]	-	505	370	460	709	525	488	429	420	383	442	335	494	7.53052380860703	5.54247545121721	6.9215967038796	8.15456740986736	6.35421179457525	7.13812029209299	6.46806314666572	5.54937726481883	5.96920011488746	6.4763225050121	5.39634198822519
ENSMUSG00000120947	3.1514705945952	5.24791398340775	3.19156559870089	5.7406102023975	6.8177160763126	6.21008910600951	2.11720092430468	0	0	1.03466585445486	2.28098134555346	3.44605867581451	5.05989426023724	1.47981780002125	1.76485910341585	0.0241256452759039	0.413102595149247	ENSMUSG00000120947	16	23807089	23807291	-	203	lncRNA	-	-	3	5	3	7	8	6	2	0	0	1	2	4	1.39408165477973	2.33402341262149	1.40670445755223	2.50891461674145	3.01734882007848	2.73494401403821	0.939680261481217	0	0	0.456603617309437	1.00396322086648
ENSMUSG00000062198	245.814706378426	242.453626033438	217.026460711661	296.051469009357	254.812138352183	244.263504836374	221.247496589839	216.418105117389	166.561778376576	264.874458740443	172.214091589287	198.148373859334	250.070317553573	206.577384045478	0.276582978495342	0.0242032582808377	0.4134282122345	2700097O09Rik	12	55092446	55126895	-	5021	protein_coding	RIKEN cDNA 2700097O09 gene [Source:MGI Symbol;Acc:MGI:1919908]	-	234	231	204	361	299	236	209	235	153	256	151	230	4.39631326862822	4.35966380753076	3.86738664251164	5.23119440801956	4.55945083978051	4.34925638400527	3.97010699600314	3.91202650565355	3.00433088017119	4.72590654936006	3.06457723652861
ENSMUSG00000005413	75.6352942702849	51.4295570373959	77.6614295683883	65.6069737416857	75.8470913489776	57.9608316560888	42.3440184860935	59.8603269473628	42.4569238999114	47.5946293049234	55.8840429660599	55.9984534819857	67.3568629371369	50.6897325143895	0.407326734813418	0.0242455012229187	0.413548755671734	Hmox1	8	75820249	75827217	+	1751	protein_coding	heme oxygenase 1 [Source:MGI Symbol;Acc:MGI:96163]	-	72	49	73	80	89	56	40	65	39	46	49	65	3.87890680873036	2.65180249975397	3.96839013068084	3.32420440367799	3.89166484382909	2.95934166681767	2.17881317053897	3.10278267863378	2.19596297400269	2.43504544742177	2.85163396857764
ENSMUSG00000073130	5.252450990992	0	5.31927599783482	2.46026151531322	0.852214509539075	6.21008910600951	1.05860046215234	0.920928106882504	0	0	0	0.861514668953626	3.34904868661477	0.473507206331412	2.73389771795755	0.0242735496554167	0.413548755671734	Gm1141	X	70964553	70984476	+	2994	protein_coding	predicted gene 1141 [Source:MGI Symbol;Acc:MGI:2685987]	-	5	0	5	3	1	6	1	1	0	0	0	1	0.157536504074975	0	0.158962928569975	0.0729043325506032	0.0255728878789217	0.185435415781482	0.0318562279693866	0.027917231747021	0	0	0
ENSMUSG00000097141	50.4235295135232	73.4707957677084	45.7457735813794	123.013075765661	91.186952520681	65.2059356130999	49.7542217211599	32.2324837408877	51.166036494765	57.941287849472	70.7104217121574	44.7987627855886	74.8410104603421	51.1005357173384	0.562980258148167	0.0243173336942008	0.4137660965865	Gm10524	18	82710409	82712301	+	1893	TEC	predicted gene 10524 [Source:MGI Symbol;Acc:MGI:3642791]	-	48	70	43	150	107	63	47	35	47	56	62	52	2.39195838073142	3.50411755872704	2.16219813523039	5.76533469774184	4.32777560227976	3.07952095400024	2.36806375456743	1.54540238498168	2.44790069854524	2.7420337673395	3.33752802372571
ENSMUSG00000085735	3.1514705945952	3.14874839004465	2.12771039913393	1.64017434354214	8.52214509539075	11.3851633610174	4.23440184860935	0	0	2.06933170890971	0	0	4.99590203062068	1.05062225958651	2.27822969233757	0.0244289281494947	0.414919319547203	Mettl5os	2	69716072	69718499	+	667	lncRNA	methyltransferase like 5, opposite strand [Source:MGI Symbol;Acc:MGI:1922537]	-	3	3	2	2	10	11	4	0	0	2	0	0	0.424285721019918	0.426212971000446	0.285418295735235	0.2181664884123	1.14790444242116	1.52601948609379	0.571979289597262	0	0	0.277932636623136	0
ENSMUSG00000032380	454.862255819908	701.121308183275	469.160143009031	793.024295102626	634.047595097072	638.604163067978	507.06962137097	476.119831258255	430.012434370898	602.175527292727	572.52631773392	382.51251301541	615.136626713315	495.069374173697	0.315265788668005	0.0245072185647388	0.415876079909519	Dapk2	9	66065505	66179524	+	4127	protein_coding	death-associated protein kinase 2 [Source:MGI Symbol;Acc:MGI:1341297]	-	433	668	441	967	744	617	479	517	395	582	502	444	9.89729289827023	15.3381589941907	10.1714242107623	17.0480960982022	13.8028903257237	13.8338774211413	11.0699890459958	10.4708086229102	9.4364616450398	13.071454075755	12.3951873013835
ENSMUSG00000038216	23.1107843603648	10.4958279668155	36.1710767852768	30.3432253555297	7.66993058585167	38.2955494870587	10.5860046215234	2.76278432064751	19.5955033384207	9.31199269009372	6.84294403666039	20.676352054887	24.3477324234828	11.6292635103721	1.05990368026211	0.0245594930204176	0.416390043706955	Pnmt	11	98277276	98279007	+	1154	protein_coding	phenylethanolamine-N-methyltransferase [Source:MGI Symbol;Acc:MGI:97724]	-	22	10	34	37	9	37	10	3	18	9	6	24	1.79837338828604	0.82115555071432	2.80446971866709	2.3328122909563	0.597129147994301	2.96680596323527	0.826495203989111	0.217289926821267	1.53784742066873	0.722889782343451	0.529821145153975
ENSMUSG00000056211	1516.90784619849	1898.69527919692	1759.61650008376	1680.35861495893	1781.9805394462	1814.38103380578	1556.14267936394	1657.67059238851	1538.24701206602	1636.84138174758	1562.47222170412	1553.31094812339	1741.98996894835	1584.11413923226	0.136831214383397	0.0247327290360227	0.417561618799372	R3hdm1	1	128031038	128165473	+	31486	protein_coding	R3H domain containing 1 [Source:MGI Symbol;Acc:MGI:2448514]	-	1444	1809	1654	2049	2091	1753	1470	1800	1413	1582	1370	1803	4.32626081040137	5.4444287349727	5.00029539135543	4.73487313222999	5.08473252280844	5.15178408335781	4.45293125243933	4.77836325131949	4.42457155532489	4.65719447641671	4.43391048966489
ENSMUSG00000037890	47.272058918928	52.4791398340775	45.7457735813794	41.8244457603247	43.4629399864928	34.1554900830523	29.6408129402655	24.8650588858276	43.5455629742681	36.21330490592	26.2312854738648	28.4299840754697	44.1566413607091	31.4876682092693	0.490794403004646	0.0247388391748281	0.417561618799372	Wdr19	5	65357039	65417758	+	11278	protein_coding	WD repeat domain 19 [Source:MGI Symbol;Acc:MGI:2443231]	-	45	50	43	51	51	33	28	27	40	35	23	33	0.376394630147569	0.420115936125344	0.362922598864261	0.329019748019206	0.34623395476007	0.270754122333185	0.236794759986666	0.200104023760036	0.349682946828971	0.287654610833796	0.20781629181706
ENSMUSG00000069539	306.743137873933	312.775673411102	398.945699837611	354.277658205103	375.826598706732	364.325227552558	322.873140956463	309.431843912521	308.084858042947	318.677083172096	270.296289448086	305.837707478537	352.148999264506	305.866820501775	0.203341773448244	0.0248799544494842	0.418451667286263	Scyl2	10	89474583	89522147	-	10099	protein_coding	SCY1-like 2 (S. cerevisiae) [Source:MGI Symbol;Acc:MGI:1289172]	-	292	298	375	432	441	352	305	336	283	308	237	355	2.72751705346151	2.79620580895385	3.5345208050686	3.11235590836091	3.343426557331	3.2252064472904	2.88049823693482	2.78089795641105	2.76283287859543	2.82688232187892	2.39140877904284
ENSMUSG00000027238	2.1009803963968	5.24791398340775	4.25542079826785	0	0	4.14005940400634	0	0.920928106882504	0	0	0	0	2.62406243034646	0.153488017813751	3.31814386866041	0.0249847906776148	0.419304022122012	Frmd5	2	121376010	121637568	-	7546	protein_coding	FERM domain containing 5 [Source:MGI Symbol;Acc:MGI:2442557]	-	2	5	4	0	0	4	0	1	0	0	0	0	0.0250020828624689	0.0627891270556802	0.0504569316870929	0	0	0.0490497071163316	0	0.0110766222966579	0	0	0
ENSMUSG00000031386	1601.99755225256	1576.47336061569	1584.08039215521	1721.36297354748	1712.098949664	2012.06887034708	1567.78728444761	1521.3732325699	1206.21209438723	1452.67085965462	1633.18264341628	1583.46396153677	1701.34701643034	1494.11501266873	0.187304074451204	0.0250291471060697	0.419304022122012	Hcfc1	X	72986398	73009963	-	8360	protein_coding	host cell factor C1 [Source:MGI Symbol;Acc:MGI:105942]	-	1525	1502	1489	2099	2009	1944	1481	1652	1108	1404	1432	1838	17.2078480174815	17.0253048480567	16.9537614143118	18.2679595257977	18.399466466001	21.5170738865217	16.8964289983551	16.5168761886554	13.0671246888922	15.5666878201671	17.4550294529308
ENSMUSG00000050812	5462.54903063168	6769.80903859599	5868.22528081137	6437.68429840291	6776.80977985472	5583.90512115355	5413.68276344706	6157.32532261642	5364.81335842983	5151.60128933073	5757.19691617694	5160.47286703222	6149.83042490837	5500.84875283887	0.161053919307132	0.0250413374706936	0.419304022122012	Ecpas	4	58798911	58912749	-	11447	protein_coding	Ecm29 proteasome adaptor and scaffold [Source:MGI Symbol;Acc:MGI:2140220]	-	5200	6450	5516	7850	7952	5395	5114	6686	4928	4979	5048	5990	42.8523512648288	53.3948380416869	45.8680441144752	49.8955545122033	53.1883183028808	43.6106936317294	42.6103584351635	48.8201193948618	42.4449052676103	40.3167790991953	44.9377691449114
ENSMUSG00000062949	134.462745369395	137.495346365283	123.407203149768	137.77464485754	143.172037602565	125.236796971192	102.684244828777	116.036941467196	82.7365696511094	94.154592755392	152.825750152082	90.4590402401308	133.591462385957	106.482856515781	0.331829224180802	0.0251896192809988	0.421108454254252	Atp11c	X	59268650	59636304	-	7312	protein_coding	ATPase, class VI, type 11C [Source:MGI Symbol;Acc:MGI:1859661]	-	128	131	116	168	168	121	97	126	76	91	134	105	1.65134107028613	1.69772113270906	1.5100782533935	1.67169475010453	1.75915727844565	1.53123700348333	1.26526559278081	1.4403184044274	1.02476423977579	1.15356108076549	1.86746495719434
ENSMUSG00000074342	10.504901981984	10.4958279668155	5.31927599783482	15.5816562636504	13.6354321526252	23.8053415730365	2.11720092430468	10.1302091757075	5.44319537178351	2.06933170890971	2.28098134555346	12.0612053653508	13.2237393226577	5.68368731526828	1.18832811579021	0.0252689379961747	0.421108454254252	I830077J02Rik	3	105831674	105839980	-	2865	protein_coding	RIKEN cDNA I830077J02 gene [Source:MGI Symbol;Acc:MGI:3588284]	-	10	10	5	19	16	23	2	11	5	2	2	14	0.329259541501205	0.330755150270271	0.166120421688832	0.482517261369821	0.427589396492797	0.742841977983969	0.0665811843213567	0.320916617925441	0.172064758915233	0.0647054340759622	0.0711359629444663
ENSMUSG00000042390	1026.32892363984	985.558246083975	870.233553245776	1059.55262592822	1080.60799809555	880.797638202349	698.676305020543	978.946577616102	903.570431716063	869.11931774208	912.392538221386	772.778658051403	983.846497532618	855.913971394596	0.201894204536544	0.0253718215347605	0.421108454254252	Gatad2b	3	90200485	90270714	+	11443	protein_coding	GATA zinc finger domain containing 2B [Source:MGI Symbol;Acc:MGI:2443225]	zf-GATA	977	939	818	1292	1268	851	660	1063	830	840	800	897	8.05411193667508	7.7760122492995	6.80441906243636	8.21497971336787	8.48420055583633	6.88149644989868	5.50110816364823	7.7645718725131	7.15129587455175	6.80416401499653	7.12416442666769
ENSMUSG00000057696	14.7068627747776	27.2891527137203	15.9578279935045	24.6026151531322	8.52214509539075	25.8753712750396	16.9376073944374	9.20928106882504	3.26591722307011	7.242660981184	12.5453974005441	12.9227200343044	19.4923291675941	10.3539306837275	0.907372356771312	0.0253724468797338	0.421108454254252	Rpl30-ps1	6	38353742	38354089	+	348	processed_pseudogene	ribosomal protein L30, pseudogene 1 [Source:MGI Symbol;Acc:MGI:1321399]	-	14	26	15	30	10	25	16	10	3	7	11	15	3.79500006023371	7.07987101828519	4.102888001194	6.27228654185362	2.20015018130723	6.64743336745399	4.38517455357901	2.40184459340749	0.849940576365763	1.8644647706802	3.22104866694663
ENSMUSG00000025422	178.583333693728	151.139922722143	94.6831127614598	172.218306071925	80.108163896673	153.182197948235	74.1020323506637	75.5161047643654	108.86390743567	134.506561079131	80.974837767148	121.473568322461	138.319172849027	99.23950195324	0.477292109420697	0.0253936981074219	0.421108454254252	Agap2	10	126911153	126929038	+	5941	protein_coding	ArfGAP with GTPase domain, ankyrin repeat and PH domain 2 [Source:MGI Symbol;Acc:MGI:3580016]	-	170	144	89	210	94	148	70	82	100	130	71	141	2.69930751873694	2.29685818541496	1.42596248861562	2.5718380770839	1.21143431629224	2.30512983105437	1.12378863117725	1.15366162796627	1.65953723040613	2.02823926288437	1.21781870916921
ENSMUSG00000034761	588.274510991104	558.378047834584	573.417952566593	583.902066301003	686.032680178955	517.507425500793	534.593233386931	561.766145198328	464.848884750312	466.634300359141	493.832461312325	552.230902799275	584.585447228839	512.317654634385	0.190248975561834	0.0255824207855503	0.423126536975329	Map4k5	12	69850524	69939974	-	8614	protein_coding	mitogen-activated protein kinase kinase kinase kinase 5 [Source:MGI Symbol;Acc:MGI:1925503]	-	560	532	539	712	805	500	505	610	427	451	433	641	6.13262141147589	5.85245396957211	5.9560940187289	6.01393882127669	7.15521327828426	5.37103973037843	5.59155572357482	5.91901056754751	4.88730631861493	4.85296389314266	5.12232198461475
ENSMUSG00000034429	85.0897060540705	54.5783054274406	52.1289047787812	70.5274967723122	64.7683027249697	48.6456979970745	52.9300231076169	49.7301177716552	39.1910066768413	49.6639610138331	30.7932481649718	51.6908801372176	62.6230689591081	45.6665394786893	0.45204777114046	0.025641865443699	0.423701953073542	Zfp707	15	75840972	75847717	+	3493	protein_coding	zinc finger protein 707 [Source:MGI Symbol;Acc:MGI:1916270]	zf-C2H2	81	52	49	86	76	47	50	54	36	48	27	60	2.18750688515537	1.41070433115559	1.33528859998779	1.79136359981482	1.6658909818269	1.24506636310424	1.36526691297371	1.29216901229069	1.01613279327324	1.27373193445839	0.787678559056569
ENSMUSG00000034801	1561.02843452282	1775.89409198518	1464.92860980371	1540.94379575784	1612.38985204793	1506.98162305831	1473.57184331606	1551.76386009702	1330.31694886389	1465.08684990808	1399.38205549705	1348.27045691243	1577.0277345293	1428.06533576575	0.14298969460967	0.0256694775249294	0.423701953073542	Sos2	12	69630536	69728626	-	8514	protein_coding	SOS Ras/Rho guanine nucleotide exchange factor 2 [Source:MGI Symbol;Acc:MGI:98355]	-	1486	1692	1377	1879	1892	1456	1392	1685	1222	1416	1227	1565	16.4644853111559	18.8320654374813	15.3949378953892	16.0574661006411	17.0144947354425	15.8241706276182	15.5937919643127	16.5420910580489	14.1509016421188	15.4157618731928	14.6857037242568
ENSMUSG00000018171	712.232354378516	879.550383619138	840.445607657901	894.715104402239	794.263922890417	1037.08488070359	677.504295777497	659.384524527873	867.645342262292	740.820751789678	677.451459629379	814.131362161177	859.715375608633	739.489622691316	0.217122789294649	0.0256843300310712	0.423701953073542	Vmp1	11	86474691	86574662	-	3862	protein_coding	vacuole membrane protein 1 [Source:MGI Symbol;Acc:MGI:1923159]	-	678	838	790	1091	932	1002	640	716	797	716	594	945	16.5607659652989	20.5618880794766	19.4711888363241	20.5540004036983	18.4771597411823	24.0075963283039	15.8057042428327	15.496188856814	20.3466354650874	17.1844698520694	15.673212467442
ENSMUSG00000029228	68.281862882896	65.0741333942561	81.9168503666562	63.9667993981436	57.098372139118	71.4160247191094	45.5198198725505	43.2836210234777	46.8114801973382	80.7039366474789	35.3552108560787	45.6602774545422	67.9590071500299	49.555724341911	0.45221909004694	0.0257335900631828	0.423776285753527	Lnx1	5	74753108	74863573	-	3829	protein_coding	ligand of numb-protein X 1 [Source:MGI Symbol;Acc:MGI:1278335]	-	65	62	77	78	67	69	43	47	43	78	31	53	1.60136740966471	1.53439637875446	1.91418101993548	1.48215326797314	1.33974148935386	1.66746586596297	1.071098067703	1.02597467144876	1.10720908720617	1.88818534251179	0.82501182409412
ENSMUSG00000031711	330.904412432496	307.527759427694	313.837283872254	359.198181235729	298.275078338676	329.134722618504	287.939325705436	256.018013713336	315.705331563444	317.642417317641	258.891382720318	223.993813927943	323.146239654226	276.698380824686	0.226986695466779	0.0259225095156563	0.4257766567281	Zfp330	8	83490236	83500789	-	5686	protein_coding	zinc finger protein 330 [Source:MGI Symbol;Acc:MGI:1353574]	-	315	293	295	438	350	318	272	278	290	307	227	260	5.22596737102181	4.88305939357417	4.93847440734642	5.60468404183079	4.71294921004608	5.17503739835335	4.56255586686131	4.08659960155847	5.02849120452766	5.00457158535727	4.06820516890155
ENSMUSG00000004098	410.741667495575	286.536103494063	469.160143009031	274.729202543309	421.846182221842	323.959648363496	341.927949275205	336.138759012114	297.19846729938	281.429112411721	242.924513301444	262.761974030856	364.495491187886	293.730129221787	0.310324514709654	0.025969909471265	0.425944943230568	Col5a3	9	20681346	20726363	-	6809	protein_coding	collagen, type V, alpha 3 [Source:MGI Symbol;Acc:MGI:1858212]	-	391	273	441	335	495	313	323	365	273	272	213	305	5.41696985288254	3.79936094886387	6.16499746186166	3.57968945537424	5.5661311533556	4.2535763378855	4.52444522433998	4.48057424371596	3.95299136031003	3.70272071278571	3.1877196142639
ENSMUSG00000057280	244.764216180227	255.048619593616	276.602351887411	250.126587390177	467.013551227413	346.729975085531	169.376073944374	196.157686765973	256.918821548182	318.677083172096	193.883414372044	265.346518037717	306.714216894063	233.393266306731	0.394708573152229	0.0260188052573795	0.425944943230568	Musk	4	58285960	58374303	+	3776	protein_coding	muscle, skeletal, receptor tyrosine kinase [Source:MGI Symbol;Acc:MGI:103581]	-	233	243	260	305	548	335	160	213	236	308	170	308	5.8208570082474	6.0982542860808	6.55418973072092	5.87694644731942	11.1116906826275	8.20929853790028	4.04142146357388	4.71489217801211	6.16206917865178	7.56056265059726	4.58776095764066
ENSMUSG00000028642	15.757352972976	10.4958279668155	17.0216831930714	13.1213947483371	14.4876466621643	8.28011880801268	10.5860046215234	8.28835296194254	4.35455629742681	7.242660981184	4.56196269110693	6.89211735162901	13.1940040585628	6.98760915080211	0.910292221138778	0.0260677045730398	0.425944943230568	Tmem269	4	119062252	119075414	-	1504	protein_coding	transmembrane protein 269 [Source:MGI Symbol;Acc:MGI:1922430]	-	15	10	16	16	17	8	10	9	4	7	4	8	0.940819733777545	0.63006217122628	1.01262767689043	0.774026849845766	0.865431414402496	0.492192938696593	0.634159219018241	0.500171360807997	0.262215709729863	0.431405412364834	0.271016667334968
ENSMUSG00000070498	6.3029411891904	11.545410763497	13.8301175943705	9.84104606125286	29.8275078338676	20.7002970200317	9.52740415937105	2.76278432064751	5.44319537178351	9.31199269009372	7.98343470943713	10.3381760274435	15.341220077035	7.56116454646274	1.02750795122318	0.0261881804499275	0.426796647065017	Tmem132b	5	125608838	125869647	+	8238	protein_coding	transmembrane protein 132B [Source:MGI Symbol;Acc:MGI:3609245]	-	6	11	13	12	35	20	9	3	5	9	7	12	0.0687056508667846	0.126532514697349	0.150210126385058	0.105984739818648	0.32529532906436	0.224647420429618	0.104199795928999	0.0304385258013768	0.0598404387341761	0.10126423996411	0.0865884763808735
ENSMUSG00000026950	107517.671785606	121945.777232446	110639.876899765	129350.709429108	125612.157633512	117201.976682867	103393.507138419	110092.350537269	103550.260113735	111362.120580831	115408.532159623	108982.467137303	118711.36161055	108798.206277863	0.125818127294445	0.0262539914170864	0.427019578329118	Neb	2	52026659	52268486	-	26675	protein_coding	nebulin [Source:MGI Symbol;Acc:MGI:97292]	-	102350	116185	103999	157728	147395	113237	97670	119545	95119	107631	101192	126501	361.94819425731	412.740300428655	371.109765033899	430.217674054825	423.067723782099	392.805133580019	349.22305419289	374.585650038526	351.568049906911	373.997184582205	386.567729857957
ENSMUSG00000053716	693.323530810944	774.592103950983	717.038404508133	837.309002378264	645.978598230619	796.961435271221	333.459145577987	318.641124981347	645.562971093525	781.172720113417	245.205494646997	627.18267899824	744.200512525027	491.870689235252	0.59718466817241	0.0262687616830406	0.427019578329118	Dusp7	9	106245831	106252923	+	3356	protein_coding	dual specificity phosphatase 7 [Source:MGI Symbol;Acc:MGI:2387100]	-	660	738	674	1021	758	770	315	346	593	755	215	728	18.5517540829746	20.8384614742834	19.1168173709983	22.1354150438312	17.2933377659698	21.2305869504526	8.95230249112282	8.61744051856405	17.4212492154494	20.8526082857363	6.52830375070286
ENSMUSG00000041040	219.552451423466	226.709884083215	213.83489511296	434.646201038668	135.502107016713	224.598222667344	88.9224388207964	150.111281421848	139.345801517658	188.309185510784	131.156427369324	229.162901941665	242.473960223727	154.501339430346	0.649587177973012	0.026295058410011	0.42708045983601	Fam117b	1	59952165	60024505	+	7290	protein_coding	family with sequence similarity 117, member B [Source:MGI Symbol;Acc:MGI:1920000]	-	209	216	201	530	159	217	84	163	128	182	115	266	2.70446741505897	2.80774372007208	2.62449757574319	5.28971435655913	1.6699411499601	2.75439000371279	1.09900053626733	1.86889208115839	1.73112725348132	2.31408467011172	1.6075117552214
ENSMUSG00000118159	1.0504901981984	1.04958279668155	1.06385519956696	1.64017434354214	2.55664352861722	3.10504455300476	0	0	0	0	0	0	1.74429843660184	0	3.23269716951073	0.0263470003827944	1	Gm50402	19	53586973	53587842	-	870	TEC	predicted gene, 50402 [Source:MGI Symbol;Acc:MGI:6303314]	-	1	1	1	2	3	3	0	0	0	0	0	0	0.108428573149535	0.108921092589003	0.109410346698507	0.16726097444943	0.264018021756867	0.319076801637792	0	0	0	0	0
ENSMUSG00000032999	5.252450990992	3.14874839004465	4.25542079826785	6.56069737416857	0.852214509539075	5.17507425500793	0	0.920928106882504	0	2.06933170890971	0	2.58454400686088	4.20743438633668	0.929133970442183	2.10619045396569	0.0265831232133317	0.429734573672271	Nlrp4f	13	65324925	65353791	-	3870	protein_coding	NLR family, pyrin domain containing 4F [Source:MGI Symbol;Acc:MGI:2145528]	-	5	3	4	8	1	5	0	1	0	2	0	3	0.121877078346376	0.0734584112809555	0.0983844978064091	0.150405217334371	0.019784296204003	0.119550739631731	0	0.021597982390331	0	0.0479020849167007	0
ENSMUSG00000045362	8.40392158558721	3.14874839004465	10.6385519956696	4.92052303062643	7.66993058585167	8.28011880801268	3.17580138645702	0	0	3.10399756336457	5.70245336388366	3.44605867581451	7.17696573263205	2.57138516491996	1.49226004851795	0.0266289946846695	0.429734573672271	Tnfrsf26	7	143161396	143182459	-	3218	protein_coding	tumor necrosis factor receptor superfamily, member 26 [Source:MGI Symbol;Acc:MGI:2651928]	-	8	3	10	6	9	8	3	0	0	3	5	4	0.234513010913848	0.0883418432744865	0.295795530229027	0.135659149568991	0.214135188559796	0.230036724611459	0.0889162957181574	0	0	0.0864113122875846	0.158331676379658
ENSMUSG00000024486	266.824510342394	503.799742407144	337.242098262727	441.206898412837	196.861551703526	460.581608695705	149.26266516348	213.655320796741	445.253381411891	162.442539149413	133.437408714878	211.071093893638	367.752734970722	219.18706818834	0.746515268308459	0.02668259022766	0.429734573672271	Hbegf	18	36637980	36648858	-	4834	protein_coding	heparin-binding EGF-like growth factor [Source:MGI Symbol;Acc:MGI:96070]	-	254	480	317	538	231	445	141	232	409	157	117	245	4.95667068568146	9.40948453975334	6.24209340421621	8.0976594642946	3.65878512153341	8.51817568294518	2.78200952879363	4.01148790015199	8.34186609538627	3.01042902094933	2.46639744091848
ENSMUSG00000104814	23.1107843603648	30.4379011037649	27.6602351887411	45.92488161918	32.3841513624848	48.6456979970745	27.5236120159608	17.4976340307676	15.2409470409938	31.0399756336457	28.5122668194183	15.5072640411653	34.6939419386017	22.5536165969919	0.634124599068196	0.0266944997218134	0.429734573672271	Gm42979	5	129633211	129635438	+	2228	TEC	predicted gene 42979 [Source:MGI Symbol;Acc:MGI:5663116]	-	22	29	26	56	38	47	26	19	14	30	25	18	0.9314734695162	1.23342871006308	1.1107998394615	1.82876002584745	1.30587010761251	1.95198240858308	1.11302343359467	0.712791582208723	0.619525806112208	1.24807721248405	1.14342759109008
ENSMUSG00000052299	828.836766378538	906.839536332859	811.721517269593	911.116847837661	921.24388481174	912.883098583398	799.243348925015	842.649217797492	857.847590593082	774.964724986688	743.599918650429	780.532290071986	882.106941868965	799.806181837449	0.14188707033336	0.0267050780390848	0.429734573672271	Ltn1	16	87173539	87229500	-	7844	protein_coding	listerin E3 ubiquitin protein ligase 1 [Source:MGI Symbol;Acc:MGI:1926163]	-	789	864	763	1111	1081	882	755	915	788	749	652	906	9.48860600038694	10.4377622230114	9.25901099463739	10.3052932224366	10.551633049536	10.4045721982298	9.18027124400297	9.75006827425821	9.90455994447242	8.85074071915452	8.4702037264791
ENSMUSG00000113682	59.8779412973088	92.3632861079763	104.257809557562	74.6279326311675	57.9505866486571	85.9062326331316	56.1058244940739	41.4417648097127	88.1797650228929	51.7332927227429	44.4791362382926	60.3060268267539	79.163964812634	57.0409683524115	0.471142920055278	0.0268081742277087	0.430375543776192	Gm48630	12	110951808	110953576	-	1769	TEC	predicted gene, 48630 [Source:MGI Symbol;Acc:MGI:6098232]	-	57	88	98	91	68	83	53	45	81	50	39	70	3.0395550833722	4.7139620399175	5.27321998841983	3.74280705120446	2.9431517179454	4.34153680916995	2.85755227056993	2.1262230826886	4.51443847118864	2.61985682062792	2.24657343685696
ENSMUSG00000027829	372.924020360432	274.990692730566	323.411980668357	305.072427898839	366.452239101802	326.029678065499	281.587722932522	251.413373178924	310.26213619166	263.839792885989	252.048438683658	320.483456850749	328.146839804249	279.939153453917	0.228554154583461	0.0268122426807658	0.430375543776192	Ccnl1	3	65853572	65865670	-	5997	protein_coding	cyclin L1 [Source:MGI Symbol;Acc:MGI:1922664]	-	355	262	304	372	430	315	266	273	285	255	221	372	5.58415287931196	4.13998229860552	4.82522069281658	4.51328512346286	5.48991951193619	4.86037449218147	4.23051982320016	3.80498322081183	4.68551533344207	3.94131836752093	3.75527780371294
ENSMUSG00000085440	88.2411766486657	95.512034498021	97.8746783601607	95.9501990972154	76.6993058585167	101.431455398155	47.6370207968552	32.2324837408877	136.079884294588	43.455965887104	50.1815896021762	61.1675414957075	92.6181416434558	61.7924143028864	0.586795883830879	0.0268160915437695	0.430375543776192	Sorbs2os	8	46176362	46272334	-	2474	lncRNA	sorbin and SH3 domain containing 2, opposite strand [Source:MGI Symbol;Acc:MGI:2443013]	-	84	91	92	117	90	98	45	35	125	42	44	71	3.2028941494616	3.48556301546943	3.53969448251757	3.44088411261267	2.78531542758861	3.6653850859119	1.73483815453333	1.18247644089342	4.98146255347759	1.57356606353285	1.81232811010093
ENSMUSG00000031309	1179.7004925768	1249.00352805104	1287.26479147603	1197.32727078576	1424.05044543979	1263.75313307294	1051.19025891727	1188.91818598531	1070.13221009264	1211.59371556664	1230.58943592609	1105.3233202675	1266.84994356706	1142.95785445924	0.148937849777895	0.0272606292022288	0.434837776684798	Rps6ka3	X	157993303	158151240	+	8322	protein_coding	ribosomal protein S6 kinase polypeptide 3 [Source:MGI Symbol;Acc:MGI:104557]	-	1123	1190	1210	1460	1671	1221	993	1291	983	1171	1079	1283	12.729608297624	13.5503493339816	13.8399750023453	12.764653313246	15.3737675033838	13.5762923205871	11.3806661517137	12.9664974380077	11.6458812835659	13.0426118338715	13.2122742134662
ENSMUSG00000106492	0	3.14874839004465	8.51084159653571	3.28034868708429	0.852214509539075	0	0	0	1.0886390743567	0	0	0	2.63202553053395	0.181439845726117	3.33518828701091	0.0273918913848998	0.435707121666332	Gm29707	5	102218084	102221817	+	2264	lncRNA	predicted gene, 29707 [Source:MGI Symbol;Acc:MGI:5588866]	-	0	3	8	4	1	0	0	0	1	0	0	0	0	0.125567160626015	0.336349829073148	0.128548628772972	0.0338185628575492	0	0	0	0.0435481920752776	0	0
ENSMUSG00000025558	639.748530702826	574.121789784807	646.823961336714	610.964942969448	624.673235492142	600.308613580919	408.619778390803	412.575791883362	408.239652883764	665.290144414473	567.964355042813	606.506326943353	616.106845644476	511.532674926428	0.268032925219911	0.0275172213801619	0.43579411158401	Dock9	14	121779458	122035249	-	13398	protein_coding	dedicator of cytokinesis 9 [Source:MGI Symbol;Acc:MGI:106321]	-	609	547	608	745	733	580	386	448	375	643	498	704	4.28785721091342	3.86882062637562	4.31957732420078	4.04576058327355	4.18885735817713	4.00572608116708	2.74785288584659	2.79487370869236	2.75954732586287	4.44842615045406	3.78767942417809
ENSMUSG00000039959	715.383824973111	638.146340382382	708.527562911598	696.25400883364	801.08163896673	674.829682853034	607.636665275442	552.556864129503	610.72652071411	722.19676640949	647.798702137184	610.813900288121	705.703843153416	625.288236492308	0.176202878881352	0.0275199315319464	0.43579411158401	Hip1	5	135435385	135573974	-	12961	protein_coding	huntingtin interacting protein 1 [Source:MGI Symbol;Acc:MGI:1099804]	-	681	608	666	849	940	652	574	600	561	698	568	709	4.95645989768574	4.4452512256677	4.89117684469167	4.7659892584516	5.552913566154	4.65481379937301	4.22395738863955	3.86933995141953	4.26747418776162	4.99174392030271	4.46574242800667
ENSMUSG00000087684	2.1009803963968	0	9.57469679610267	3.28034868708429	0.852214509539075	5.17507425500793	0	0	1.0886390743567	0	0	1.72302933790725	3.49721910735513	0.468611402043993	2.8125219225879	0.0275219008054956	0.43579411158401	1200007C13Rik	2	167669613	167675566	-	2455	lncRNA	RIKEN cDNA 1200007C13 gene [Source:MGI Symbol;Acc:MGI:1921369]	-	2	0	9	4	1	5	0	0	1	0	0	2	0.0768495793401998	0	0.348954384785868	0.118547493092468	0.0311874648918499	0.188456766751445	0	0	0.0401601249932499	0	0
ENSMUSG00000023025	827.78627618034	782.988766324436	762.784178089513	879.95353531036	828.35250327198	803.17152437723	678.562896239649	826.072511873606	610.72652071411	729.439427390674	739.037955959323	758.132908679191	814.172797258977	723.662036809426	0.169579575107631	0.027584847136272	0.435856700752127	Larp4	15	99867946	99914239	+	10843	protein_coding	La ribonucleoprotein domain family, member 4 [Source:MGI Symbol;Acc:MGI:2443114]	-	788	746	717	1073	972	776	641	897	561	705	648	880	6.85550978588905	6.51959490105272	6.29429864124887	7.20002731062839	6.86354329731861	6.62224877253238	5.63838488724155	6.91460113344748	5.10105440815073	6.02663715680532	6.08988923386796
[truncated: 247 more rows]
[truncated: 1 more columns]
