# Supplementary material for: Loss of CTRP10 results in female obesity with preserved metabolic health
Source: eLife. 2025 Mar 24;13:RP93373. doi: 10.7554/eLife.93373 (PMC11932693; doi:10.7554/eLife.93373)
Supplement: Figure 8—source data 8. [file elife-93373-fig8-data8.xls]

gene_id	KO_Muscle1	KO_Muscle2	KO_Muscle3	KO_Muscle4	KO_Muscle5	KO_Muscle6	WT_Muscle1	WT_Muscle2	WT_Muscle3	WT_Muscle4	WT_Muscle5	WT_Muscle6	KO_Muscle	WT_Muscle	log2FoldChange	pvalue	padj	gene_name	gene_chr	gene_start	gene_end	gene_strand	gene_length	gene_biotype	gene_description	tf_family	KO_Muscle1_count	KO_Muscle2_count	KO_Muscle3_count	KO_Muscle4_count	KO_Muscle5_count	KO_Muscle6_count	WT_Muscle1_count	WT_Muscle2_count	WT_Muscle3_count	WT_Muscle4_count	WT_Muscle5_count	WT_Muscle6_count	KO_Muscle1_fpkm	KO_Muscle2_fpkm	KO_Muscle3_fpkm	KO_Muscle4_fpkm	KO_Muscle5_fpkm	KO_Muscle6_fpkm	WT_Muscle1_fpkm	WT_Muscle2_fpkm	WT_Muscle3_fpkm	WT_Muscle4_fpkm	WT_Muscle5_fpkm
ENSMUSG00000059824	1126.12549246869	1768.54701240841	1392.58645623316	1192.40674775514	1164.12502003038	1459.37093991224	3044.53492915013	2214.83209705242	2437.46288748466	2066.22771134635	2783.937732248	2006.467663993	1350.52694480133	2425.57717021243	-0.844959431968098	3.27161897408995e-12	3.09789600656578e-08	Dbp	7	45354512	45359627	+	2993	protein_coding	D site albumin promoter binding protein [Source:MGI Symbol;Acc:MGI:94866]	TF_bZIP	1072	1685	1309	1454	1366	1410	2876	2405	2239	1997	2441	2329	33.7871114140267	53.348772362462	41.6303993086069	35.346105489315	34.9442362642049	43.5918824556275	91.6491225693377	67.1633750085689	73.7554180608157	61.8453047192416	83.1083974429372
ENSMUSG00000020889	757.403432901047	998.153239644153	871.297408445343	666.730870649881	837.72686287691	645.849267024989	2233.64697514143	1752.52618739741	1483.81505834819	988.105891004389	1762.05808944005	1312.94835548533	796.193513590387	1588.8500928028	-0.996906180632268	6.20381121228945e-11	3.91625922461125e-07	Nr1d1	11	98658758	98666159	-	3077	protein_coding	nuclear receptor subfamily 1, group D, member 1 [Source:MGI Symbol;Acc:MGI:2444210]	THR-like	721	951	819	813	983	624	2110	1903	1363	955	1545	1524	22.1039945009778	29.2876322311873	25.3357667640842	19.2241403701375	24.4600641736204	18.7650757310285	65.4035174521042	51.69344071877	43.6731896808703	28.7681053850159	51.1663966162592
ENSMUSG00000087413	63.029411891904	36.7353978838542	36.1710767852768	49.2052303062643	33.2363658720239	30.015430679046	125.973454996128	99.4602355433105	69.672900758829	79.669270793024	144.842315442645	97.3511575917598	41.3988189030615	102.828222520949	-1.31082877323317	4.23187385510087e-09	8.01432270679002e-06	Gm11266	4	82426167	82465538	+	1366	lncRNA	predicted gene 11266 [Source:MGI Symbol;Acc:MGI:3649705]	-	60	35	34	60	39	29	119	108	64	77	127	113	4.14346377628529	2.42799946510625	2.36922258809797	3.19583560258428	2.18597644661066	1.96444795151818	8.30887850534471	6.60841341131971	4.61929636818406	5.22486906454159	9.47407606045343
ENSMUSG00000026874	0	0	0	0	0	0	11.6446050836757	5.52556864129503	4.35455629742681	5.17332927227429	37.6361922016322	6.03060268267538	0	11.7274756964966	-6.02436987146924	2.68843239228758e-08	3.63668090322444e-05	Hc	2	34873343	34951450	-	6265	protein_coding	hemolytic complement [Source:MGI Symbol;Acc:MGI:96031]	-	0	0	0	0	0	0	11	6	4	5	33	7	0	0	0	0	0	0	0.167462571738831	0.0800487072790878	0.0629485119606886	0.0739748877205234	0.536755755513533
ENSMUSG00000044768	161.775490522554	195.222400182768	157.450569535911	145.15542940348	169.590687398276	135.586945481208	314.404337259244	332.455046584584	263.450655994322	196.586512346423	305.651500304164	223.993813927943	160.796920420699	272.756977736113	-0.76240155308839	5.56054036692068e-08	6.19444196874963e-05	Macir	1	97534043	97589799	-	41324	protein_coding	macrophage immunometabolism regulator [Source:MGI Symbol;Acc:MGI:1277184]	-	154	186	148	177	199	131	297	361	242	190	268	260	0.351545354529442	0.426522388993138	0.340907855989249	0.311641146252392	0.368707773584087	0.293333842179356	0.685488610068774	0.730178425565281	0.577377114019449	0.426173688888418	0.660870378811588
ENSMUSG00000030359	0	5.24791398340775	2.12771039913393	3.28034868708429	4.26107254769537	2.07002970200317	67.7504295777497	32.2324837408877	18.5068642640639	5.17332927227429	152.825750152082	41.3527041097741	2.83117921988742	52.973593519472	-4.2133914244135	1.21952111802727e-07	0.000116592506090266	Pzp	6	128460530	128503683	-	6414	protein_coding	PZP, alpha-2-macroglobulin like [Source:MGI Symbol;Acc:MGI:87854]	-	0	5	2	4	5	2	64	35	17	5	134	48	0	0.0738707129345436	0.0296810107975369	0.0453748200096676	0.05968601988579	0.0288532187324476	0.951693635575613	0.456103323163444	0.261316310663125	0.0722564190160709	2.12892169738151
ENSMUSG00000070509	394.984314522599	393.593548755581	367.030043850602	288.670684463417	340.033589306091	275.313950366422	719.84831426359	684.249583413701	440.898825114465	555.615563842258	654.641646173844	405.773409077158	343.271021877452	576.837890314169	-0.749262282572013	1.91055271776861e-07	0.00017229546366239	Rgma	7	73025257	73069647	+	5544	protein_coding	repulsive guidance molecule family member A [Source:MGI Symbol;Acc:MGI:2679262]	-	376	375	345	352	399	266	680	743	405	537	574	471	6.3977552035851	6.40972338693402	5.92343354284935	4.61958881812711	5.51037613591037	4.43967973996018	11.6985446694505	11.2018496654007	7.20241852050208	8.97814158126246	10.5504872314037
ENSMUSG00000028364	45.1710785225312	47.2312258506697	74.4698639696875	32.8034868708429	47.7240125341882	40.3655791890618	193.723884573878	179.580980842088	211.1959804252	132.437229370222	57.0245336388366	61.1675414957075	47.9608744894969	139.188358390989	-1.53971943833518	2.08911292031878e-07	0.000179834638568168	Tnc	4	63878022	63965252	-	7772	protein_coding	tenascin C [Source:MGI Symbol;Acc:MGI:101922]	-	43	45	70	40	56	39	183	195	194	128	50	71	0.521913654339178	0.548669682817739	0.857319880846507	0.374464868170366	0.551679448447185	0.464328181487831	2.24576569954746	2.09713296588565	2.46102196738743	1.52655537727334	0.655572998700128
ENSMUSG00000024330	137.614215963991	118.602856025015	139.365031143272	130.3938603116	102.265741144689	94.1863514411443	314.404337259244	263.385438568396	329.857639530081	167.615868421687	176.776054280394	160.241728425375	120.404676004952	235.380177747529	-0.966764147397759	3.48853783197599e-07	0.000275274706091506	Col11a2	17	34258411	34285659	+	6874	protein_coding	collagen, type XI, alpha 2 [Source:MGI Symbol;Acc:MGI:88447]	-	131	113	131	159	120	91	297	286	303	162	155	186	1.79773123099396	1.55775859942172	1.81400890503765	1.68295101800914	1.33660563822214	1.22496898388439	4.12090941554874	3.47760821490633	4.34589924034097	2.18444378219932	2.29776714755338
ENSMUSG00000029368	12.6058823783808	107.057445261518	22.3409591909062	23.7825279813611	7.66993058585167	68.3109801661046	1190.92551992138	615.179975397513	109.952546510027	40.3519683237394	2785.07822292078	835.669228885018	40.2946209273537	929.526243659743	-4.5290031602015	3.97808936647601e-07	0.000301348225689291	Alb	5	90608756	90624461	+	2342	protein_coding	albumin [Source:MGI Symbol;Acc:MGI:87991]	-	12	102	21	29	9	66	1125	668	101	39	2442	970	0.483345133937294	4.12709554071226	0.853512824159572	0.900938169376412	0.294230160881906	2.60765584259066	45.8154311946569	23.8404099727532	4.25188035555136	1.54352298814638	106.253345778663
ENSMUSG00000037798	0	4.1983311867262	2.12771039913393	3.28034868708429	1.70442901907815	0	56.1058244940739	32.2324837408877	6.53183444614022	6.20799512672914	246.345985319774	50.829365468264	1.88513654867043	66.3755814326449	-5.12698897491622	6.20834799702563e-07	0.000419906051313112	Mat1a	14	40826992	40846369	+	3468	protein_coding	methionine adenosyltransferase I, alpha [Source:MGI Symbol;Acc:MGI:88017]	-	0	4	2	4	2	0	53	35	6	6	216	59	0	0.109297982182737	0.0548944646065172	0.0839198660732434	0.0441552631542627	0	1.45761533063385	0.843554416023739	0.170576309443648	0.160364246217674	6.34685399488949
ENSMUSG00000030256	489.528432360455	647.592585552516	574.48180776616	499.433087608583	481.501197889577	520.612470053797	886.048586821507	793.840028132719	759.870073900979	590.794202893723	847.384569873112	718.503233907324	535.524930205181	766.073449254894	-0.517146970589716	6.5851317978384e-07	0.000430031813749874	Bhlhe41	6	145803969	145811284	-	6720	protein_coding	basic helix-loop-helix family, member e41 [Source:MGI Symbol;Acc:MGI:1930704]	bHLH	466	617	540	609	565	503	837	862	698	571	743	834	6.54153454260184	8.70055852542424	7.64895548794024	6.59374122712362	6.43740370012837	6.92615075221796	11.8796140556946	10.721662704643	10.240772111188	7.87593676981976	11.2668726666719
ENSMUSG00000030103	1442.3230421264	1839.91864258276	1304.2864746691	1586.86867737702	1229.74553726488	1153.00654401577	2742.83379743671	2756.33782389934	1878.99104233967	1792.04125991581	2343.70833255618	1831.58018619541	1426.02481967266	2224.24874039052	-0.641310739157182	8.97549467259151e-07	0.000566593060365127	Bhlhe40	6	108637590	108643886	+	4705	protein_coding	basic helix-loop-helix family, member e40 [Source:MGI Symbol;Acc:MGI:1097714]	bHLH	1373	1753	1226	1935	1443	1114	2591	2993	1726	1732	2055	2126	27.5279521600108	35.3064075490785	24.8032442073456	29.9230061038143	23.4821724898185	21.9088101035292	52.5235330682317	53.1705602994237	36.1682683183098	34.1211488696129	44.5077913956181
ENSMUSG00000050069	67.2313726846976	38.8345634772173	56.3843255770491	58.2261891957461	121.866674864088	41.4005940400634	154.555667474241	198.920471086621	123.016215402307	101.397253736576	188.180961008161	120.612053653508	63.9906199731435	147.780437060236	-1.20097575443995	1.21472813649299e-06	0.000657272041397262	Grem2	1	174661351	174749385	-	3745	protein_coding	gremlin 2, DAN family BMP antagonist [Source:MGI Symbol;Acc:MGI:1344367]	-	64	37	53	71	143	40	146	216	113	98	165	140	1.61209691667986	0.9362269613992	1.34710576402354	1.3794005863473	2.92358541048258	0.988328677970196	3.71832357673969	4.82087728697609	2.97490549399264	2.42554669232415	4.48968599237955
ENSMUSG00000070803	105.04901981984	110.206193651563	93.6192575618928	86.9292402077336	71.5860188012823	98.3264108451506	211.720092430468	165.767059238851	106.686629286957	128.298565952402	223.53617186424	165.410816439096	94.2860234812437	166.903222535336	-0.826573999622721	3.76877945943284e-06	0.00165984059076138	Cited4	4	120523769	120525017	+	1249	protein_coding	Cbp/p300-interacting transactivator, with Glu/Asp-rich carboxy-terminal domain, 4 [Source:MGI Symbol;Acc:MGI:1861694]	-	100	105	88	106	84	95	200	180	98	124	196	192	7.55267082786991	7.96632650761042	6.7065301387011	6.1748627156631	5.14930265011792	7.03808317463664	15.2726255468925	12.0457602346714	7.73588828833146	9.20226281418187	15.9910683073801
ENSMUSG00000019987	2.1009803963968	1.04958279668155	4.25542079826785	2.46026151531322	0.852214509539075	3.10504455300476	26.4650115538085	19.3394902445326	2.17727814871341	1.03466585445486	71.8509123849341	29.2914987444233	2.30391742820054	25.0264761551445	-3.45138086978009	4.32054637541302e-06	0.00185960243767209	Arg1	10	24791119	24803382	-	2228	protein_coding	arginase, liver [Source:MGI Symbol;Acc:MGI:88070]	-	2	1	4	3	1	3	25	21	2	1	63	34	0.0846794063196546	0.0425320244849338	0.170892282994077	0.0979692870989704	0.0343650028319082	0.124594621824452	1.07021483999488	0.787822275072799	0.0885036865874582	0.0416025737494685	2.881437529547
ENSMUSG00000040134	0	0	0	0	0	0	9.52740415937105	7.36742485506003	1.0886390743567	1.03466585445486	41.0576642199624	0.861514668953626	0	10.1562188053598	-5.81856489673583	4.94447318555794e-06	0.00199230708910843	Rdh7	10	127719897	127724686	-	1678	protein_coding	retinol dehydrogenase 7 [Source:MGI Symbol;Acc:MGI:1860517]	-	0	0	0	0	0	0	9	8	1	1	36	1	0	0	0	0	0	0	0.511560142349876	0.398494359239956	0.0587563211313638	0.055238697445659	2.18622265139817
ENSMUSG00000096606	1083.05539434255	1197.57397101365	1083.00459315917	1068.57358481771	1250.19868549382	1257.54304396693	1456.63423592162	1326.13647391081	1564.37434985058	1422.66554987543	1531.67897353915	1339.65531022289	1156.6582121323	1440.19081555341	-0.315481095772787	5.48146584970362e-06	0.00216266667211848	Tpbgl	7	99273289	99276310	-	3022	protein_coding	trophoblast glycoprotein-like [Source:MGI Symbol;Acc:MGI:3646425]	-	1031	1141	1018	1303	1467	1215	1376	1440	1437	1375	1343	1555	32.1830500522628	35.7785244805842	32.0649793702844	31.3713953086728	37.167831567182	37.2027501843401	43.4280291328632	39.8283376124541	46.8822946907881	42.1738863936124	45.2861497256135
ENSMUSG00000025991	2.1009803963968	3.14874839004465	0	2.46026151531322	2.55664352861722	0	27.5236120159608	31.3115556340051	6.53183444614022	2.06933170890971	140.280352751538	30.1530134133769	1.71110563839531	39.6449499949885	-4.51643414724022	6.64526358283522e-06	0.00237354425746433	Cps1	1	67162185	67270418	+	5555	protein_coding	carbamoyl-phosphate synthetase 1 [Source:MGI Symbol;Acc:MGI:891996]	-	2	3	0	3	3	0	26	34	6	2	123	35	0.0339632254329776	0.0511762469230059	0	0.0392935322513962	0.0413493571428397	0	0.446411558964704	0.511586412766831	0.106491204527556	0.0333719295459283	2.25634182374574
ENSMUSG00000060407	0	0	0	0	0	0	9.52740415937105	6.44649674817753	2.17727814871341	0	26.2312854738648	5.16908801372176	0	8.25859209064143	-5.5213637729962	6.76794750781887e-06	0.00237354425746433	Cyp2a12	7	26728506	26736800	+	3457	protein_coding	cytochrome P450, family 2, subfamily a, polypeptide 12 [Source:MGI Symbol;Acc:MGI:105055]	-	0	0	0	0	0	0	9	7	2	0	23	6	0	0	0	0	0	0	0.248307179306651	0.169247712743438	0.0570396915582462	0	0.677972849034655
ENSMUSG00000020609	1.0504901981984	1.04958279668155	0	0	1.70442901907815	6.21008910600951	39.1682170996365	20.2604183514151	2.17727814871341	11.3813243990034	215.552737154802	47.3833067924495	1.6690985199946	55.9872136576701	-5.07928375397482	6.89981912650515e-06	0.00237579590214099	Apob	12	8027648	8066835	+	13934	protein_coding	apolipoprotein B [Source:MGI Symbol;Acc:MGI:88052]	-	1	1	0	0	2	6	37	22	2	11	189	55	0.00676997693699549	0.00680072847369259	0	0	0.0109896980493026	0.0398445266865048	0.253263185158082	0.13196872547099	0.0141514434991285	0.0731732365043759	1.38219667342415
ENSMUSG00000046668	276.278922126179	346.362322904911	245.750551099969	215.682926175792	283.787431676512	279.454009770428	447.787995490439	503.74767446473	347.275864719788	340.405066115648	604.460056571668	361.836160960523	274.552693958965	434.252136387133	-0.661826334446281	7.42613118186215e-06	0.00247451722893353	Cxxc5	18	35962450	35994741	+	3008	protein_coding	CXXC finger 5 [Source:MGI Symbol;Acc:MGI:1914643]	-	263	330	231	263	333	270	423	547	319	329	530	420	8.24785299944981	10.3960258252336	7.30990604255282	6.36153317216989	8.47613708811857	8.30575584050502	13.4124674822358	15.1996519089986	10.4558514254783	10.1380271905736	17.9548542109416
ENSMUSG00000022868	0	7.34707957677084	1.06385519956696	0	5.96550156677352	8.28011880801268	133.383658231195	71.8323923368353	16.3295861153505	9.31199269009372	328.461313759699	40.4911894408204	3.77609252518734	99.9683554289989	-4.72924517544599	7.44785521434212e-06	0.00247451722893353	Ahsg	16	22710027	22718199	+	2197	protein_coding	alpha-2-HS-glycoprotein [Source:MGI Symbol;Acc:MGI:107189]	-	0	7	1	0	7	8	126	78	15	9	288	47	0	0.301925104172521	0.0433258996939922	0	0.24394928728559	0.336940455074955	5.46999128997873	2.96748610120405	0.67314365174166	0.379706330825827	13.358148781233
ENSMUSG00000091712	731.141177946087	840.715820141921	751.081770894276	652.789388729773	709.894686446049	592.028494772907	1173.98791252694	1071.96031641124	791.440607057323	822.559354291611	1369.72929800486	1035.54063208226	712.941889821836	1044.20302006237	-0.550680098543656	8.43421023958476e-06	0.00269804827717484	Sec14l5	16	4964973	5005135	+	5740	protein_coding	SEC14-like lipid binding 5 [Source:MGI Symbol;Acc:MGI:3616084]	-	696	801	706	796	833	572	1109	1164	727	795	1201	1202	11.4382699675098	13.2236658175084	11.7076695381806	10.0898580161776	11.1112950375969	9.22098603757437	18.4274737131082	16.9498256644732	12.4873151021041	12.8378004842306	21.3213628168041
ENSMUSG00000074254	0	1.04958279668155	0	0	0	0	14.8204064701327	4.60464053441252	0	1.03466585445486	29.652757492195	11.1996906963971	0.174930466113592	10.2186935079321	-5.35030005068652	9.59306140179081e-06	0.00293021607785668	Cyp2a4	7	26006594	26014513	+	1738	protein_coding	cytochrome P450, family 2, subfamily a, polypeptide 4 [Source:MGI Symbol;Acc:MGI:88596]	-	0	1	0	0	0	0	14	5	0	1	26	13	0	0.0545232166584767	0	0	0	0	0.768288637263987	0.24046085112365	0	0.0533317228502968	1.52442976977367
ENSMUSG00000042292	361.36862818025	513.245987577278	367.030043850602	352.637483861561	399.688604973826	320.854603810491	962.267820096476	931.979244165094	555.205927921918	449.044980833408	1029.86307751739	584.968460219512	385.804225375668	752.221585125633	-0.96321821638016	1.24181984429378e-05	0.00351008719570681	Mrtfa	15	80896482	81074958	-	6421	protein_coding	myocardin related transcription factor A [Source:MGI Symbol;Acc:MGI:2384495]	-	344	489	345	430	469	310	909	1012	510	434	903	679	5.05380834327873	7.21667971034722	5.11439270542856	4.87247551327922	5.59244527941932	4.46737337910566	13.5022877752955	13.1735247084236	7.83094292132044	6.26501976206137	14.3307501988642
ENSMUSG00000036438	1104.06519830652	1431.63093467363	1373.43706264095	1024.28887754207	1228.89332275535	899.427905520378	1805.97238843189	1620.83346811321	1582.88121411465	1356.44693519032	2139.56050212915	1601.55576958479	1176.95721690648	1684.54171292733	-0.517281769671773	1.31822435189335e-05	0.00364879173688913	Calm2	17	87740840	87754363	-	1467	protein_coding	calmodulin 2 [Source:MGI Symbol;Acc:MGI:103250]	-	1051	1364	1291	1249	1442	869	1706	1760	1454	1311	1876	1859	67.5827092234084	88.1080314611575	83.767156851644	61.946418768229	75.2604337684299	54.8129139609679	110.916219766753	100.278239711672	97.7194119782924	82.8338721781953	130.312646719884
ENSMUSG00000038518	501.083824540637	441.874357402932	401.073410236745	464.989426394198	472.979052794186	411.935910698631	579.054452797329	558.082432770798	556.294566996275	539.060910170981	678.591950302156	556.538476144043	448.989330344555	577.937131530264	-0.362098359100612	1.39831309506593e-05	0.00374954283891508	Jarid2	13	44882950	45075119	+	9715	protein_coding	jumonji, AT rich interactive domain 2 [Source:MGI Symbol;Acc:MGI:104813]	ARID	477	421	377	567	555	398	547	606	511	521	595	646	4.63168024408908	4.10648775940032	3.69382394376152	4.24643160505194	4.3740299126884	3.79082289706988	5.3702025689725	5.21379518903263	5.18590608385558	4.97084594724632	6.24105494762522
ENSMUSG00000025608	724.838236756897	721.063381320224	680.867327722857	743.819064796362	748.244339375308	696.564994724067	1144.34709958668	1191.68097030596	865.468064113579	808.074032329243	1036.70602155405	806.377730140594	719.232890782619	975.442319671684	-0.439077456570312	1.5733833948753e-05	0.00408174448385595	Podxl	6	31496423	31540916	-	5488	protein_coding	podocalyxin-like [Source:MGI Symbol;Acc:MGI:1351317]	-	690	687	640	907	878	673	1081	1294	795	781	909	936	11.8603630578837	11.8624358289944	11.1005249711604	12.0247779089195	12.2493200983479	11.3473431806938	18.7870130849328	19.7080802213286	14.2823469301113	13.1908358781141	16.8784913681514
ENSMUSG00000042961	400.236765513591	370.502727228587	394.690279039344	388.721319419488	480.648983380038	378.81543546658	500.718018598056	565.449857625858	492.06486160923	489.396949157147	553.137976296715	501.401537331011	402.269251674605	517.028200103003	-0.36039916275543	1.72548123985761e-05	0.00441583293519235	Egflam	15	7235601	7427876	-	6121	protein_coding	EGF-like, fibronectin type III and laminin G domains [Source:MGI Symbol;Acc:MGI:2146149]	-	381	353	371	474	564	366	473	614	452	473	485	582	5.87172343438593	5.46491696536656	5.76938042866803	5.63429836982976	7.05485829742741	5.53288869887849	7.37029562384945	8.38436428626966	7.2805234928949	7.16265687476472	8.07426882130449
ENSMUSG00000024386	0	0	0	0	0	0	5.29300231076169	11.0511372825901	2.17727814871341	0	19.3883414372044	4.30757334476813	0	7.03622208733962	-5.29312484395026	1.79247517883681e-05	0.00452611932490819	Proc	18	32256179	32272623	-	2478	protein_coding	protein C [Source:MGI Symbol;Acc:MGI:97771]	-	0	0	0	0	0	0	5	12	2	0	17	5	0	0	0	0	0	0	0.192448641122566	0.404766062230416	0.0795747432271416	0	0.699087384021435
ENSMUSG00000050592	372.924020360432	545.783054274406	418.095093429817	412.503847400849	433.777185355389	517.507425500793	626.691473594184	659.384524527873	660.803918134519	475.946293049234	710.525689139904	619.429046977657	450.098437720281	625.463490903895	-0.475095640095613	1.83465816653919e-05	0.00457167846814726	Fam78a	2	31940067	31974869	-	5973	protein_coding	family with sequence similarity 78, member A [Source:MGI Symbol;Acc:MGI:2443569]	-	355	520	393	503	509	500	592	716	607	460	623	719	5.60659045994204	8.24977436585718	6.26293179971311	6.12716181389712	6.52464426444519	7.74587916247778	9.45312364839835	10.01946783275	10.0194233823985	7.13839708427177	10.6286811133236
ENSMUSG00000022037	568.315197225335	582.51845215826	514.90591659041	451.868031645861	536.895141009617	501.982202735769	769.60253598475	710.035570406411	769.667825570189	594.932866311543	662.625080883281	609.952385619168	526.080823560875	686.136044129224	-0.383675532441902	2.32088224988674e-05	0.00542628000596976	Clu	14	66205932	66218996	+	3437	protein_coding	clusterin [Source:MGI Symbol;Acc:MGI:88423]	-	541	555	484	551	630	485	727	771	707	575	581	708	14.84843657966	15.3018765075939	13.4042795425683	11.664226552491	14.0343592013324	13.0573616963501	20.1744184855484	18.7499016342152	20.2808631215912	15.5068540094396	17.2258414545615
ENSMUSG00000026305	2221.78676918962	2418.23876355429	2266.01157507763	2262.62050691639	2386.20062670941	2447.81012261875	2869.86585289499	2774.75638603699	2693.29306995848	2432.49942382337	2933.34201038176	2802.50721810615	2333.77806067768	2751.04399353362	-0.237295010624792	3.07768231449273e-05	0.00677734275254226	Lrrfip1	1	90926459	91056666	+	6469	protein_coding	leucine rich repeat (in FLII) interacting protein 1 [Source:MGI Symbol;Acc:MGI:1342770]	LRRFIP	2115	2304	2130	2759	2800	2365	2711	3013	2474	2351	2572	3253	30.841551402659	33.7502166753447	31.3415231824088	31.0311898902613	33.1399959292899	33.8288490343607	39.9704017113729	38.9301545904777	37.7058813367989	33.6861100899337	40.515169348116
ENSMUSG00000030834	0	0	0	1.64017434354214	0.852214509539075	0	6.35160277291403	11.0511372825901	4.35455629742681	6.20799512672914	26.2312854738648	3.44605867581451	0.415398142180203	9.60710593822323	-4.32677858061693	3.20926746501746e-05	0.00690648946051144	Abcc6	7	45616979	45679726	-	5721	protein_coding	ATP-binding cassette, sub-family C (CFTR/MRP), member 6 [Source:MGI Symbol;Acc:MGI:1351634]	-	0	0	0	2	1	0	6	12	4	6	23	4	0	0	0	0.0254355965339983	0.0133831893566669	0	0.100028889921703	0.175320800945109	0.0689341771427572	0.0972108382945105	0.409675255919036
ENSMUSG00000021492	0	2.0991655933631	0	0	0	0	8.46880369721871	2.76278432064751	3.26591722307011	1.03466585445486	57.0245336388366	1.72302933790725	0.349860932227183	12.3799556786892	-5.14158877656813	3.68096559781259e-05	0.00766045346059064	F12	13	55565771	55574606	-	1960	protein_coding	coagulation factor XII (Hageman factor) [Source:MGI Symbol;Acc:MGI:1891012]	-	0	2	0	0	0	0	8	3	3	1	50	2	0	0.0966952556657475	0	0	0	0	0.389296108327933	0.127934987526399	0.150907816620044	0.0472910889356203	2.59954762545786
ENSMUSG00000033831	0	0	0	0.820087171771072	2.55664352861722	0	62.457427266988	12.8929934963551	0	6.20799512672914	117.470539296003	35.3221014270987	0.562788450064716	39.058509435529	-6.03329503398155	3.80215172688502e-05	0.00768576112153326	Fgb	3	82947448	82957170	-	3810	protein_coding	fibrinogen beta chain [Source:MGI Symbol;Acc:MGI:99501]	-	0	0	0	1	3	0	59	14	0	6	103	41	0	0	0	0.0190967254292656	0.0602875797712531	0	1.4769751301523	0.307133513361714	0	0.145969345376088	2.75483818702064
ENSMUSG00000047591	1244.8308848651	1421.13510670682	1350.03224825048	1273.59537776047	1367.80428781021	1357.93948451408	1869.48841616103	1382.31308843064	1906.20701919859	1624.42539149413	2091.65989387253	1537.80368408222	1335.88956498453	1735.31624887319	-0.376654313984112	3.81227038646048e-05	0.00768576112153326	Mafa	15	75617339	75620077	-	2739	protein_coding	v-maf musculoaponeurotic fibrosarcoma oncogene family, protein A (avian) [Source:MGI Symbol;Acc:MGI:2673307]	TF_bZIP	1185	1354	1269	1553	1605	1312	1766	1501	1751	1570	1834	1785	40.8121348990554	46.8444208280371	44.1008780816182	41.2537377123712	44.8657131167338	44.3236003969138	61.4957090873481	45.8049915909901	63.0290361844134	53.1303902419462	68.2324781042412
ENSMUSG00000042834	1009.52108046866	1048.53321388487	1033.00339877952	1221.10979876713	1027.77069850412	1280.31337068896	1603.77970016079	1836.33064512371	1365.15339924331	1159.86042284389	1797.41330029613	1314.67138482323	1103.37526018221	1512.86814208185	-0.455056462213953	3.9207570618239e-05	0.00768576112153326	Nrep	18	33570072	33597082	-	3908	protein_coding	neuronal regeneration related protein [Source:MGI Symbol;Acc:MGI:99444]	-	961	999	971	1489	1206	1237	1515	1994	1254	1121	1576	1526	23.1970002950695	24.2237945757114	23.6506086439349	27.721965728125	23.6278564302064	29.2892582015161	36.9746630011823	42.6476147773946	31.6365803481242	26.5880473300377	41.0946705892236
ENSMUSG00000010492	472.72058918928	477.560172490105	474.479419006866	525.675877105257	540.303999047773	499.912173033766	708.203709179914	643.728746710871	555.205927921918	618.730180964005	750.44286268709	566.015137502533	498.442038312174	640.387760827722	-0.359067365022768	3.97721295759985e-05	0.00768576112153326	Uckl1os	2	181220273	181226963	+	2522	lncRNA	uridine-cytidine kinase 1-like 1, opposite strand [Source:MGI Symbol;Acc:MGI:3801877]	-	450	455	446	641	634	483	669	699	510	598	658	657	16.8317947613175	17.0961199450265	16.8332286780153	18.4925510747846	19.2475628391029	17.7212877103114	25.3003880394488	23.1662768055337	19.9375434170494	21.97816793008	26.5867135733583
ENSMUSG00000040441	72.4838236756896	75.5699613610715	57.448180776616	108.251506673781	69.8815897822041	52.7857574010808	169.376073944374	129.850863070433	87.0911259485362	104.501251299941	158.528203515966	120.612053653508	72.7368032784073	128.326595238793	-0.812381624242584	4.14342334679501e-05	0.00778707121460124	Slc26a10	10	127007262	127016514	-	4519	protein_coding	solute carrier family 26, member 10 [Source:MGI Symbol;Acc:MGI:2143920]	-	69	72	54	132	82	51	160	141	80	101	139	140	1.44035566412183	1.50980686872652	1.13744148880191	2.12527664370132	1.38932253980489	1.04428986417857	3.37694344909382	2.60795995816152	1.7453968906117	2.07164062086643	3.13441360955848
ENSMUSG00000056174	8.40392158558721	13.6445763568601	22.3409591909062	13.1213947483371	8.52214509539075	14.4902079140222	59.2816258805309	42.3626929165952	81.6479305767527	28.970643924736	11.4049067277673	26.7069547375624	13.4205341485173	41.7291257939908	-1.64136639620566	4.19411376010839e-05	0.00778707121460124	Col8a2	4	126180586	126208123	+	4489	protein_coding	collagen, type VIII, alpha 2 [Source:MGI Symbol;Acc:MGI:88464]	-	8	13	21	16	10	14	56	46	75	28	10	31	0.16811380466045	0.27442583140602	0.445294505275499	0.259330893777686	0.17056187638559	0.288583607629636	1.18982905018027	0.856509874165007	1.64724504664338	0.578154368631508	0.227004381639447
ENSMUSG00000071052	57.776960900912	52.4791398340775	60.6397463753169	37.7240099014693	67.3249462535869	65.2059356130999	84.6880369721871	102.223019863958	100.154794840817	77.5999390841143	109.487104586566	82.7054082195481	56.8584564797438	92.8097172611984	-0.708880594005375	4.4028190757466e-05	0.00809520268509603	Rpl7a-ps5	17	58145425	58146216	-	792	processed_pseudogene	ribosomal protein L7A, pseudogene 5 [Source:MGI Symbol;Acc:MGI:3643553]	-	55	50	57	46	79	63	80	111	92	75	96	96	6.55089296111772	5.98240849447175	6.85057966259968	4.22587386203673	7.63718797784069	7.36052167414451	9.6340956101357	11.7144511305738	11.45273463507	8.77751271911134	12.3517899294482
ENSMUSG00000000049	6.3029411891904	6.2974967800893	11.7024071952366	5.7406102023975	1.70442901907815	5.17507425500793	39.1682170996365	13.8139216032376	10.886390743567	6.20799512672914	88.9582724765851	24.9839253996552	6.15382644016665	30.6697870749018	-2.32514330329419	4.51148316911979e-05	0.00821523733238371	Apoh	11	108234180	108305222	+	1594	protein_coding	apolipoprotein H [Source:MGI Symbol;Acc:MGI:88058]	-	6	6	11	7	2	5	37	15	10	6	78	29	0.355079769034235	0.356692662054326	0.656873913365564	0.31951672973558	0.0960667833243305	0.290251795718192	2.21390791843959	0.786551366222529	0.618526391834558	0.348897870691904	4.98643464215805
ENSMUSG00000022893	682.818628828961	559.427630631266	520.225192588245	411.683760229078	739.722194279917	410.900895847629	887.10718728366	838.965505369962	996.104753036383	886.708637267813	725.352067886002	646.13600171522	554.129717067516	830.06235875984	-0.582577322127825	4.69228759098686e-05	0.0084630992760104	Adamts1	16	85590715	85600001	-	5302	protein_coding	a disintegrin-like and metallopeptidase (reprolysin type) with thrombospondin type 1 motif, 1 [Source:MGI Symbol;Acc:MGI:109249]	-	650	533	489	502	868	397	838	911	915	857	636	750	11.5647601124221	9.52617877111402	8.77903504261518	6.88886816116975	12.53463154218	6.92857641881534	15.0747612223327	14.3615991655751	17.0148420926937	14.9822308387288	12.2236593285204
ENSMUSG00000021999	0	0	0	0	0	0	7.41020323506637	10.1302091757075	0	2.06933170890971	6.84294403666039	6.03060268267538	0	5.41388180650323	-4.92374020918127	5.53643123087635e-05	0.00979896585517161	Cpb2	14	75479727	75520995	+	1629	protein_coding	carboxypeptidase B2 (plasma) [Source:MGI Symbol;Acc:MGI:1891837]	-	0	0	0	0	0	0	7	11	0	2	6	7	0	0	0	0	0	0	0.409848266287541	0.564411363018041	0	0.113800533227521	0.375330633215278
ENSMUSG00000049551	513.689706919018	459.717264946519	478.734839805134	608.504681454135	438.038257903084	528.89258886181	898.751792367335	790.156315705189	583.510543855193	664.255478560018	607.881528589998	626.321164329286	504.59622331495	695.146137234503	-0.461860745223913	5.68588102733135e-05	0.00997029767551863	Fzd9	5	135277792	135280084	-	2293	protein_coding	frizzled class receptor 9 [Source:MGI Symbol;Acc:MGI:1313278]	-	489	438	450	742	514	511	849	858	536	642	533	727	20.1172123310103	18.1009470309487	18.6803971794441	23.5441887148027	17.1628985272912	20.6210166745331	35.3142333243574	31.2757246436103	23.0466224492445	25.9517326774835	23.6868330864659
ENSMUSG00000022791	1025.27843344164	1104.16110210899	950.022693213299	887.3343198563	905.051809130497	919.093187689408	1268.2033536585	1059.06732291488	1111.50049491819	1231.25236680128	1499.7452347014	1225.07385925206	965.156924240022	1232.47377204105	-0.352797814295561	5.8725996549275e-05	0.0101806603670696	Tnk2	16	32462692	32502311	+	6377	protein_coding	tyrosine kinase, non-receptor, 2 [Source:MGI Symbol;Acc:MGI:1858308]	-	976	1052	893	1082	1062	888	1198	1150	1021	1190	1315	1422	14.4376462337671	15.6325765691013	13.3294640824113	12.3451031588699	12.750865664212	12.8851588455017	17.9178768629969	15.073203799305	15.7854103971233	17.2968066227757	21.0132477649524
ENSMUSG00000071178	0	6.2974967800893	0	0	0	6.21008910600951	105.860046215234	45.1254772372427	9.79775166921033	6.20799512672914	248.626966665328	49.9678507993103	2.08459764768313	77.597681285509	-5.23473238905047	6.16516332272157e-05	0.0103469152714714	Serpina1b	12	103694415	103796632	-	2415	protein_coding	serine (or cysteine) preptidase inhibitor, clade A, member 1B [Source:MGI Symbol;Acc:MGI:891970]	-	0	6	0	0	0	6	100	49	9	6	218	58	0	0.235431926838342	0	0	0	0.229893844658285	3.94938080912395	1.69591113899729	0.367427727422715	0.230287041773455	9.19863113379406
ENSMUSG00000071177	0	4.1983311867262	0	2.46026151531322	0	3.10504455300476	51.8714226454646	19.3394902445326	2.17727814871341	6.20799512672914	109.487104586566	18.0918080480262	1.62727287584069	34.5291831333387	-4.40959044980799	6.17383792204174e-05	0.0103469152714714	Serpina1d	12	103729853	103739851	-	1394	protein_coding	serine (or cysteine) peptidase inhibitor, clade A, member 1D [Source:MGI Symbol;Acc:MGI:891968]	-	0	4	0	3	0	3	49	21	2	6	96	21	0	0.271912053235101	0	0.156582189136661	0	0.199136884809813	3.35258233893603	1.25915927465007	0.141453524904488	0.398954954004946	7.01765970166643
ENSMUSG00000067235	11.5553921801824	5.24791398340775	1.06385519956696	4.92052303062643	3.4088580381563	2.07002970200317	19.0548083187421	15.6557778170026	7.62047352049692	7.242660981184	92.3797444949153	19.8148373859334	4.71109535565717	26.9613837530457	-2.51459715407009	6.8220741448507e-05	0.0111376241513088	H2-Q10	17	35780986	35785460	+	4348	protein_coding	histocompatibility 2, Q region locus 10 [Source:MGI Symbol;Acc:MGI:95929]	-	11	5	1	6	4	2	18	17	7	7	81	23	0.238652586255991	0.108971194287526	0.0218921346889836	0.100402746852119	0.0704371907171034	0.0425631428127689	0.394847248787071	0.326801118091047	0.158728552899954	0.149225791213595	1.89836329814944
ENSMUSG00000033161	1887.73088616253	1654.14248757012	1785.14902487336	1748.42585021592	1603.86770695254	1819.55610806079	2293.98720148412	2298.63655477873	1924.71388346265	2305.23552372542	1946.81757842988	1972.00707723485	1749.81201063921	2123.56630318594	-0.279744404489642	7.15834620693985e-05	0.0114885390226294	Atp1a1	3	101483535	101512000	-	4568	protein_coding	ATPase, Na+/K+ transporting, alpha 1 polypeptide [Source:MGI Symbol;Acc:MGI:88105]	-	1797	1576	1678	2132	1882	1758	2167	2496	1768	2228	1707	2289	37.1094892680059	32.6934957247447	34.9658031373209	33.9582252460355	31.5446050600838	35.611150396449	45.2458720124615	45.6712221670424	38.1595037052762	45.2089558781045	38.0795029835677
ENSMUSG00000028186	0	3.14874839004465	2.12771039913393	0	0	2.07002970200317	38.1096166374842	12.8929934963551	5.44319537178351	1.03466585445486	99.2226885315757	16.3687787101189	1.22441474853029	28.8453231002954	-4.59441585430474	7.76296116741216e-05	0.012149996577558	Uox	3	146276181	146338060	+	5007	protein_coding	urate oxidase [Source:MGI Symbol;Acc:MGI:98907]	-	0	3	2	0	0	2	36	14	5	1	87	19	0	0.0567773220805468	0.0380215704524469	0	0	0.036961163361278	0.685758273507562	0.233708545218321	0.0984552694811549	0.0185121897970473	1.7706205755665
ENSMUSG00000010660	178.583333693728	184.726572215953	156.386714336344	151.716126777648	167.034043869659	168.707420713258	251.946909992257	231.152954827509	205.752785053417	221.418492853339	253.188929356435	189.533227169798	167.859035267765	225.498883208792	-0.425338979440289	8.83880794770219e-05	0.0132642522519825	Plcd1	9	118900595	118922570	-	3093	protein_coding	phospholipase C, delta 1 [Source:MGI Symbol;Acc:MGI:97614]	-	170	176	147	185	196	163	238	251	189	214	222	220	5.18479986059366	5.39217513651087	4.52392151285872	4.351867739676	4.85185397887498	4.87641785108904	7.33910639398699	6.78293959084894	6.02460303790591	6.41311811935227	7.31403273707871
ENSMUSG00000020882	2687.15392699151	2887.40227367094	2662.82956451611	2404.49558763278	2623.96847487081	2522.33119189086	3227.67280910248	3482.02917212275	3048.18940819877	2693.23521914599	3562.89286175451	3201.38850983168	2631.36350326217	3202.5679966927	-0.283679069802791	8.91152593259431e-05	0.0132642522519825	Cacnb1	11	97892334	97913860	-	4529	protein_coding	calcium channel, voltage-dependent, beta 1 subunit [Source:MGI Symbol;Acc:MGI:102522]	-	2558	2751	2503	2932	3079	2437	3049	3781	2800	2603	3124	3716	53.2796317953993	57.5598311701793	52.6061084288221	47.1026699121863	52.0521818959868	49.7904941535607	64.2097901085245	69.7796046339249	60.9540073313314	53.2730096751739	70.2898392253631
ENSMUSG00000047963	568.315197225335	660.187579112694	646.823961336714	573.240933067979	702.224755860197	725.545410552111	853.231972494785	707.272786085763	1057.06854120036	763.583400587685	827.996228435908	853.761036933044	646.056306192505	843.81899428959	-0.384874962237488	9.45218759252519e-05	0.0135996155533776	Stbd1	5	92750900	92754438	+	2221	protein_coding	starch binding domain 1 [Source:MGI Symbol;Acc:MGI:1261768]	-	541	629	608	699	824	701	806	768	971	738	726	991	22.9779723207076	26.8369606021972	26.0574952677362	22.8987880215965	28.4060092206308	29.2053683047936	34.6124729903273	28.9025931297821	43.1039652226628	30.7994661520018	33.3097909871365
ENSMUSG00000046574	238.461274991037	236.156129253349	280.857772685678	209.942315973394	246.289993256793	230.808311773353	442.494993179677	390.473517318182	358.162255463355	303.157095355273	353.552108560787	230.885931279572	240.419299655601	346.454316859474	-0.526662218529864	9.47908571679082e-05	0.0135996155533776	Prr12	7	44676987	44702305	-	7185	protein_coding	proline rich 12 [Source:MGI Symbol;Acc:MGI:2679002]	-	227	225	264	256	289	223	418	424	329	293	310	268	2.9803143926655	2.96747444318682	3.49747646899276	2.59237051004711	3.07965906798094	2.87191325844342	5.54875636101094	4.93245613704193	4.51456258266151	3.779864516903	4.39661833605621
ENSMUSG00000026643	267.875000540592	246.651957220164	298.943311078317	253.406936077261	271.004214033426	221.493178114339	483.780411203619	493.617465289022	364.694089909495	256.597131904805	388.907319416866	311.006795492259	259.89576617735	383.100535536011	-0.559725257254606	0.000100261413933849	0.0139791073680113	Nmt2	2	3285249	3329914	+	6556	protein_coding	N-myristoyltransferase 2 [Source:MGI Symbol;Acc:MGI:1202298]	-	255	235	281	309	318	214	457	536	335	248	341	361	3.66913955967423	3.39672321229738	4.0798577573801	3.42928369136976	3.71381055009431	3.02042500147061	6.64849584639063	6.83360689931533	5.03793331262562	3.50629232913763	5.30028569539662
ENSMUSG00000027966	53.5750001081184	39.8841462738989	23.4048143904732	41.0043585885536	28.1230788147895	17.5952524670269	92.0982402072534	122.483438215373	158.941304856079	58.9759537039269	27.3717761466416	55.9984534819857	33.9311084404767	85.9781944352099	-1.3411176038513	0.000103346615772859	0.0141824507935247	Col11a1	3	113824189	114014367	+	12744	protein_coding	collagen, type XI, alpha 1 [Source:MGI Symbol;Acc:MGI:88446]	-	51	38	22	50	33	17	87	133	146	57	24	65	0.37750908589492	0.282558954880135	0.164321565898416	0.285461879651216	0.198262120857911	0.123434450099993	0.65111790246468	0.872308342445641	1.12951927191859	0.414576306959157	0.191906340711766
ENSMUSG00000068614	5765.09020771282	6811.79235046325	9009.78968513261	4812.27152395265	7968.20566419035	6508.17338309797	13276.9669963146	14785.5007559986	8468.52335942079	14696.3937966768	9528.7995710496	8815.87960740246	6812.55380242494	11595.3440144771	-0.767309303863896	0.000121516821972352	0.016321174287322	Actc1	2	113877763	113884029	-	1618	protein_coding	actin, alpha, cardiac muscle 1 [Source:MGI Symbol;Acc:MGI:87905]	-	5488	6490	8469	5868	9350	6288	12542	16055	7779	14204	8355	10233	319.962131159977	380.099607592885	498.231592574164	263.873311594639	442.450473420114	359.606260397123	739.323355197149	829.384548925262	474.014696076462	813.70602558309	526.201137267896
ENSMUSG00000002799	605.082354162279	726.311295303632	635.121554141477	638.027819637894	617.00330490629	671.724638300029	772.778337371207	794.760956239601	719.590428149781	765.652732296594	823.434265744801	770.194114044542	648.8784944086	774.401805641088	-0.255836685968056	0.000125268764901866	0.0167066188007855	Jag2	12	112871439	112893396	-	6965	protein_coding	jagged 2 [Source:MGI Symbol;Acc:MGI:1098270]	-	576	692	597	778	724	649	730	863	661	740	722	894	7.80125291840558	9.4149109235152	8.15888585380292	8.12722635792111	7.95882610884017	8.62217442013622	9.99649805806902	10.3565193922543	9.35679018426723	9.84795339443269	10.5633074967349
ENSMUSG00000032083	5.252450990992	9.44624517013394	1.06385519956696	0	0	5.17507425500793	78.336434199273	46.0464053441252	13.0636688922804	1.03466585445486	244.065003974221	64.613600171522	3.48960426928347	74.5266297393127	-4.43021640611351	0.000127352890458103	0.0168042268084302	Apoa1	9	46139878	46141764	+	1236	protein_coding	apolipoprotein A-I [Source:MGI Symbol;Acc:MGI:88049]	-	5	9	1	0	0	5	74	50	12	1	214	75	0.381605415210741	0.690009834119655	0.0770121372392401	0	0	0.374321490594497	5.71030618445422	3.38123753440861	0.95721462969348	0.0749923416778445	17.6432727511657
ENSMUSG00000027249	3.1514705945952	5.24791398340775	2.12771039913393	2.46026151531322	7.66993058585167	0	27.5236120159608	11.0511372825901	1.0886390743567	7.242660981184	86.6772911310317	15.5072640411653	3.44288117971696	24.8484340877147	-2.83358111268907	0.000127775301532049	0.0168042268084302	F2	2	91455665	91466759	-	4594	protein_coding	coagulation factor II [Source:MGI Symbol;Acc:MGI:88380]	-	3	5	2	3	9	0	26	12	1	7	76	18	0.0616017796953168	0.103135993200297	0.0414397046703094	0.0475131849491741	0.149997178229304	0	0.539794560306689	0.218330496779924	0.0214612770697493	0.141235032694103	1.68580154239531
ENSMUSG00000035606	3837.44069401876	4364.16526860188	3746.89801287485	4094.69524865296	5079.19847685288	3356.55316179814	8692.16839473285	8226.65077878141	5388.76341806568	4263.85798620847	6651.3416036339	5821.25461811965	4079.82514379991	6507.33946659033	-0.673506699444127	0.00013478114965073	0.0176033476695553	Ky	9	102382949	102423438	+	5879	protein_coding	kyphoscoliosis peptidase [Source:MGI Symbol;Acc:MGI:96709]	-	3653	4158	3522	4993	5960	3243	8211	8933	4950	4121	5832	6757	58.6150591277884	67.0212103413871	57.0247694731693	61.7933848886395	77.6201307713164	51.0430616833295	133.210585923246	127.004181969933	83.0134170690969	64.9732423723822	101.087603447095
ENSMUSG00000060807	0	0	0	3.28034868708429	0	2.07002970200317	26.4650115538085	7.36742485506003	6.53183444614022	0	34.214720183302	5.16908801372176	0.891729731514576	13.2913465086721	-3.83093919409095	0.000154942859170025	0.0198264045064996	Serpina6	12	103612889	103623471	-	1761	protein_coding	serine (or cysteine) peptidase inhibitor, clade A, member 6 [Source:MGI Symbol;Acc:MGI:88278]	-	0	0	0	4	0	2	25	8	6	0	30	6	0	0	0	0.16526638020557	0	0.105090599062986	1.35402536258296	0.379712399094064	0.335921999517644	0	1.73598410422399
ENSMUSG00000033565	1297.35539477502	1420.08552391014	1153.21903633059	1329.36130544091	1026.06626948505	1158.18161827077	1693.76073944374	1557.28942873831	1334.67150516132	1407.14556205861	1628.62068072517	1635.15484167398	1230.71152470208	1542.77379296686	-0.326441042451032	0.000183224347397313	0.022679102555623	Rbfox2	15	76963190	77191204	-	8140	protein_coding	RNA binding protein, fox-1 homolog (C. elegans) 2 [Source:MGI Symbol;Acc:MGI:1933973]	-	1235	1353	1084	1621	1204	1119	1600	1691	1226	1360	1428	1898	14.3121720418326	15.7508731323638	12.6760085705685	14.4891360219163	11.3248811396349	12.7203455650467	18.7474292953992	17.363743049058	14.8495269052129	15.4863791973943	17.8767121816744
ENSMUSG00000057400	1.0504901981984	5.24791398340775	1.06385519956696	2.46026151531322	0	3.10504455300476	41.2854180239412	19.3394902445326	0	5.17332927227429	159.668694188743	24.1224107307015	2.15459424158185	41.5982237433654	-4.27784533567538	0.000197139850639085	0.0237798375248598	Ces1c	8	93825643	93857911	-	2323	protein_coding	carboxylesterase 1C [Source:MGI Symbol;Acc:MGI:95420]	-	1	5	1	3	0	3	39	21	0	5	140	28	0.0406082043220384	0.203963302954009	0.0409758939421872	0.0939627945142084	0	0.119499275688712	1.60125885280818	0.755603972820575	0	0.19950610054631	6.14133334847728
ENSMUSG00000023070	0	0	1.06385519956696	0	0	0	21.1720092430468	1.84185621376501	2.17727814871341	0	78.6938564215945	10.3381760274435	0.177309199927827	19.0371960090939	-6.25013090242282	0.000207874347119098	0.0244517042592638	Rgn	X	20416026	20428328	+	1607	protein_coding	regucalcin [Source:MGI Symbol;Acc:MGI:108024]	-	0	0	1	0	0	0	20	2	2	0	69	12	0	0	0.0592327328112637	0	0	0	1.18702609259917	0.104025129870045	0.122704551161703	0	4.37539291682539
ENSMUSG00000033688	1.0504901981984	0	0	0	0.852214509539075	0	5.29300231076169	0.920928106882504	0	1.03466585445486	33.0742295105252	14.6457493722116	0.317117451289579	9.16142919247266	-4.71204206869321	0.000216334726844681	0.0252897966480529	Inhca	9	103127720	103182281	-	4508	protein_coding	inhibitor of carbonic anhydrase [Source:MGI Symbol;Acc:MGI:1919025]	-	1	0	0	0	1	0	5	1	0	1	29	17	0.0209256563088055	0	0	0	0.0169843004235784	0	0.105786985958677	0.0185413025400579	0	0.0205613430154871	0.65553809685459
ENSMUSG00000056035	0	0	0	0	0	0	8.46880369721871	3.68371242753002	0	0	18.2478507644277	6.03060268267538	0	6.0718282619753	-5.07966005271653	0.000219612573480683	0.0255154780158109	Cyp3a11	5	145791236	145816774	-	5093	protein_coding	cytochrome P450, family 3, subfamily a, polypeptide 11 [Source:MGI Symbol;Acc:MGI:88609]	-	0	0	0	0	0	0	8	4	0	0	16	7	0	0	0	0	0	0	0.149817469531268	0.0656463317106466	0	0	0.32013278434855
ENSMUSG00000030096	1891.93284695532	2014.14938683189	1931.96104241361	1896.86162830649	2051.28032446055	1506.98162305831	2683.55217155618	2809.75165409852	2066.23696312902	2093.12902356218	2659.62424891534	2152.92515771511	1882.19447533769	2410.86986982939	-0.356942728708243	0.000224838091760057	0.0258059623136482	Slc6a6	6	91661034	91736047	+	8457	protein_coding	solute carrier family 6 (neurotransmitter transporter, taurine), member 6 [Source:MGI Symbol;Acc:MGI:98488]	-	1801	1919	1816	2313	2407	1456	2535	3051	1898	2023	2332	2499	20.0890952359952	21.5025460222441	20.4398244006036	19.899546617851	21.7917109763446	15.9308252008444	28.5895802861264	30.1543537112595	22.12719839391	22.1725140022288	28.0993362247434
ENSMUSG00000028307	1.0504901981984	12.5949935601786	1.06385519956696	2.46026151531322	0	4.14005940400634	41.2854180239412	26.7069150995926	2.17727814871341	3.10399756336457	268.015308102532	66.3366295094292	3.55160997954392	67.9375910745955	-4.26555040062391	0.000229006361275236	0.025969595627727	Aldob	4	49535995	49549546	-	2392	protein_coding	aldolase B, fructose-bisphosphate [Source:MGI Symbol;Acc:MGI:87995]	-	1	12	1	3	0	4	39	29	2	3	235	77	0.0394368138127488	0.475391390731267	0.0397938970015472	0.091252329287837	0	0.154736241596922	1.55506869359256	1.01335349651624	0.0824357080756091	0.116250670126023	10.0113013067382
ENSMUSG00000025026	543.103432468573	435.576860622843	479.798695004701	382.160622045319	507.919847685288	459.546593844704	652.09788468584	659.384524527873	575.890070334696	535.956912607616	551.997485623938	583.245430881605	468.017675278571	593.095384776928	-0.343298568932479	0.000240636574908317	0.0270609909689382	Add3	19	53128874	53235830	+	6380	protein_coding	adducin 3 (gamma) [Source:MGI Symbol;Acc:MGI:1351615]	-	517	415	451	466	596	444	616	716	529	518	484	677	7.6442144070422	6.16394364878676	6.72873632195816	5.31433732455234	7.15248822577694	6.43954999668998	9.20886656251592	9.38029488479872	8.17488299813616	7.52565780165463	7.73051680067191
ENSMUSG00000025533	103.998529621642	75.5699613610715	97.8746783601607	78.7283684900229	91.186952520681	115.921663312178	155.614267936394	157.478706276908	116.484380956167	124.159902534583	130.015936696547	125.781141667229	93.8800256109592	134.922389344638	-0.527520211368122	0.000255904936534497	0.0283410975911713	Asl	5	130040099	130058088	-	4831	protein_coding	argininosuccinate lyase [Source:MGI Symbol;Acc:MGI:88084]	-	99	72	92	96	107	112	147	171	107	120	114	146	1.93313040889452	1.41229915954774	1.8127104429204	1.44583280749497	1.69581436868466	2.14523173611995	2.90219402637766	2.95857934308618	2.18370160088012	2.30239373166175	2.40464881569987
ENSMUSG00000054422	2.1009803963968	0	2.12771039913393	0	0.852214509539075	0	22.2306097051991	4.60464053441252	0	5.17332927227429	112.908576604896	19.8148373859334	0.846817550844967	27.4553322504526	-5.04098891873017	0.00026351846642671	0.028519180882944	Fabp1	6	71176811	71182007	+	553	protein_coding	fatty acid binding protein 1, liver [Source:MGI Symbol;Acc:MGI:95479]	-	2	0	2	0	1	0	21	5	0	5	99	23	0.341167662351158	0	0.344256787080292	0	0.138454297123854	0	3.62193214710165	0.755734103531472	0	0.838069930504663	18.242901310808
ENSMUSG00000040017	0	0	0	0	0	0	8.46880369721871	3.68371242753002	0	0	14.8263787460975	6.89211735162901	0	5.64516870374588	-4.97615129312485	0.000290373919601562	0.0312448936898544	Saa4	7	46377422	46382027	-	2094	protein_coding	serum amyloid A 4 [Source:MGI Symbol;Acc:MGI:98224]	-	0	0	0	0	0	0	8	4	0	0	13	8	0	0	0	0	0	0	0.364384131959287	0.159664167813908	0	0	0.632631074466726
ENSMUSG00000030403	221.653431819863	176.3299098425	194.685501520754	171.398218900154	232.654561104167	149.042138544228	409.678378852955	315.878340660699	265.627934143035	204.863839182062	329.601804432476	210.209579224685	190.960626955278	289.309979415985	-0.597604829184422	0.000308094860873143	0.0327792161528965	Vasp	7	18990854	19005742	-	2617	protein_coding	vasodilator-stimulated phosphoprotein [Source:MGI Symbol;Acc:MGI:109268]	-	211	168	183	209	273	144	387	343	244	198	289	244	7.6057444299045	6.08326591242211	6.65617932666001	5.81067309593807	7.98712525123851	5.09157326572189	14.1043601494509	10.955054568112	9.19247920269643	7.012887196842	11.2532499576947
ENSMUSG00000026579	0	1.04958279668155	0	0	0.852214509539075	4.14005940400634	8.46880369721871	6.44649674817753	2.17727814871341	2.06933170890971	49.0410989293995	4.30757334476813	1.00697611837116	12.0850970961978	-3.60428161517102	0.000312057119069124	0.0330152945303412	F5	1	163979407	164047846	+	7430	protein_coding	coagulation factor V [Source:MGI Symbol;Acc:MGI:88382]	-	0	1	0	0	1	4	8	7	2	2	43	5	0	0.0127538829814849	0	0	0.0103048756809544	0.0498154898923066	0.10269453194115	0.0787468833047195	0.0265391943091328	0.0249503457103138	0.589743940440345
ENSMUSG00000005681	4.2019607927936	17.8429075435863	5.31927599783482	4.10043585885536	5.11328705723445	2.07002970200317	60.3402263426833	30.3906275271226	4.35455629742681	2.06933170890971	305.651500304164	46.5217921234958	6.44131615871796	74.8880057173004	-3.54170763032945	0.000316987199761114	0.0333505754948665	Apoa2	1	171052623	171053948	+	537	protein_coding	apolipoprotein A-II [Source:MGI Symbol;Acc:MGI:88050]	-	4	17	5	5	6	2	57	33	4	2	268	54	0.702665613706482	2.99989377912729	0.886284931356618	0.677453667462775	0.855477388932865	0.344626713128341	10.1238736551203	5.1364587170748	0.734399306208033	0.345216142695776	50.8562523910802
ENSMUSG00000038224	0	3.14874839004465	0	0	1.70442901907815	0	12.7032055458281	2.76278432064751	3.26591722307011	0	37.6361922016322	14.6457493722116	0.808862901520466	11.8356414438982	-3.86882297253802	0.000332335669385701	0.0342052875371	Serpinf2	11	75322558	75330417	-	2324	protein_coding	serine (or cysteine) peptidase inhibitor, clade F, member 2 [Source:MGI Symbol;Acc:MGI:107173]	-	0	3	0	0	2	0	12	3	3	0	33	17	0	0.122325323432572	0	0	0.0658909004384608	0	0.492483028607626	0.107896977431903	0.127271652571121	0	1.44697711200184
ENSMUSG00000032860	685.970099423556	668.584241486147	531.927599783482	628.186773576641	452.525904565249	634.464103663972	788.657344303492	737.663413612886	726.122262595921	836.010010399525	703.682745103244	795.178039444197	600.276453749841	764.552302576544	-0.350316035639287	0.000356204936067013	0.0364638328607411	P2ry2	7	100645775	100662073	-	3927	protein_coding	purinergic receptor P2Y, G-protein coupled 2 [Source:MGI Symbol;Acc:MGI:105107]	-	653	637	500	766	531	613	745	801	667	808	617	923	15.6861106931454	15.3712707669721	12.1195571209194	14.1922661818932	10.3529755972345	14.4441769867966	18.0942888139944	17.0488764126089	16.7460153487578	19.0715436021297	16.0106184589697
ENSMUSG00000017344	196.441667063101	235.106546456667	189.36622552292	169.758044556612	199.418195232143	178.022554372273	285.822124781131	306.669059591874	198.13231153292	221.418492853339	336.444748469136	273.1001500583	194.685538867286	270.26448121445	-0.474622599916224	0.000361477205384408	0.036804598470806	Vtn	11	78389917	78393150	+	2030	protein_coding	vitronectin [Source:MGI Symbol;Acc:MGI:98940]	-	187	224	178	207	234	172	270	333	182	214	295	317	8.689775648127	10.4564248885443	8.34644644814322	7.41921893807828	8.82574529872956	7.84017284024288	12.6856835299964	13.7111014217948	8.83938199420393	9.77131741042196	14.8084575077806
ENSMUSG00000037542	1.0504901981984	0	0	0.820087171771072	0	0	3.17580138645702	4.60464053441252	0	0	30.7932481649718	12.9227200343044	0.311762894994912	8.58273502002428	-4.61866449413689	0.000365254101517872	0.0369902790082645	Aldh8a1	10	21253190	21272484	+	4389	protein_coding	aldehyde dehydrogenase 8 family, member A1 [Source:MGI Symbol;Acc:MGI:2653900]	-	1	0	0	1	0	0	3	5	0	0	27	15	0.0214930186010698	0	0	0.0165774718353844	0	0	0.0651931281888882	0.0952200864098665	0	0	0.626876556569741
ENSMUSG00000009035	496.881863747844	446.072688589658	417.03123823025	422.344893462102	456.786977112944	439.881311675674	590.699057881005	582.947491656625	546.496815327065	515.263595518519	589.633677825571	463.494891897051	446.499828803079	548.089255017639	-0.294812653271498	0.000368188936565237	0.0370891600035769	Tmem184b	15	79244884	79287769	-	4702	protein_coding	transmembrane protein 184b [Source:MGI Symbol;Acc:MGI:2445179]	-	473	425	392	515	536	425	558	633	502	498	517	538	9.48946025877606	8.56520076239554	7.935624125491	7.96908545321853	8.7279798600356	8.36372092766011	11.3187305337115	11.2524018378174	10.5261037096833	9.817074880536	11.2044814965077
ENSMUSG00000024411	322.500490846909	366.304396041861	347.880650258397	340.336176284995	202.8270532703	320.854603810491	468.960004733486	509.273243106025	323.325805083941	518.367593081883	399.171735471856	455.741259876468	316.783895085492	445.806606892277	-0.495270408431795	0.000383523016211214	0.0380270098482092	Aqp4	18	15522553	15544039	-	6233	protein_coding	aquaporin 4 [Source:MGI Symbol;Acc:MGI:107387]	-	307	349	327	415	238	310	443	553	297	501	350	529	4.64626786499426	5.30590587883827	4.99376697132331	4.84434259786352	2.92355588988592	4.60211847701548	6.7787988316015	7.4156999989365	4.6979227878956	7.45033815036446	5.72209103502034
ENSMUSG00000058952	0	1.04958279668155	0	1.64017434354214	2.55664352861722	0	10.5860046215234	8.28835296194254	0	2.06933170890971	34.214720183302	9.47666135848989	0.874400111473486	10.7725118056946	-3.53810691133442	0.000388329352363572	0.0381045661920276	Cfi	3	129629533	129668981	+	2220	protein_coding	complement component factor i [Source:MGI Symbol;Acc:MGI:105937]	-	0	1	0	2	3	0	10	9	0	2	30	11	0	0.0426852930416363	0	0.0655482197166685	0.103466522039853	0	0.429628588019565	0.338854831826679	0	0.0835049858683025	1.37705766105335
ENSMUSG00000066366	1.0504901981984	6.2974967800893	0	0	0	2.07002970200317	44.4612194103982	21.1813464582976	3.26591722307011	1.03466585445486	142.561334097092	13.784234703258	1.56966944671514	37.7147862910951	-4.6091909646862	0.00039213880134801	0.038280023814065	Serpina1a	12	103819848	103829821	-	1832	protein_coding	serine (or cysteine) peptidase inhibitor, clade A, member 1A [Source:MGI Symbol;Acc:MGI:891971]	-	1	6	0	0	0	2	42	23	3	1	125	16	0.0514917350655541	0.310353768184823	0	0	0	0.101017764710655	2.18660314120875	1.0493648540193	0.161451594200483	0.0505952698219519	6.95293851787309
ENSMUSG00000029405	1181.8014729732	1348.71389373579	1304.2864746691	1390.86784332374	1373.76978937699	1433.4955686372	1547.67387566672	1761.73546846623	1542.60156836345	1543.72145484665	1410.78696222482	1724.75236724516	1338.82250711934	1588.54528280217	-0.247233278500503	0.000435589397235425	0.0410098216443223	G3bp2	5	92200005	92231578	-	8659	protein_coding	GTPase activating protein (SH3 domain) binding protein 2 [Source:MGI Symbol;Acc:MGI:2442040]	-	1125	1285	1226	1696	1612	1385	1462	1913	1417	1492	1237	2002	12.2559725106949	14.0626325741859	13.4772218495855	14.2508899999782	14.2537411722947	14.8004616442798	16.1037040122395	18.4659382157479	16.1342455732063	15.9711603183062	14.557466702564
ENSMUSG00000038600	4.2019607927936	4.1983311867262	11.7024071952366	4.92052303062643	5.96550156677352	0	20.1134087808944	21.1813464582976	31.5705331563444	10.3466585445486	13.6858880733208	9.47666135848989	5.16478729535939	17.7290827286493	-1.77678752062603	0.000439156728503263	0.0410098216443223	Atp6v0a4	6	38025418	38101521	-	4973	protein_coding	ATPase, H+ transporting, lysosomal V0 subunit A4 [Source:MGI Symbol;Acc:MGI:2153480]	-	4	4	11	6	7	0	19	23	29	10	12	11	0.0758760174060689	0.0762206720711301	0.210548364750595	0.0877842636865096	0.1077732926134	0	0.364402450083757	0.38657478635901	0.574944721273764	0.186387561459513	0.245893264229917
ENSMUSG00000028584	483.225491171264	547.882219867769	388.307147841942	381.340534873548	465.309122208335	416.075970102637	711.379510566371	700.826289337586	548.674093475778	470.77296377696	614.724472626659	526.385462730666	447.023414344249	595.460465419003	-0.414239541851368	0.000464901967077087	0.0425329152294969	Lrrc38	4	143076327	143097602	+	2324	protein_coding	leucine rich repeat containing 38 [Source:MGI Symbol;Acc:MGI:2442845]	-	460	522	365	465	546	402	672	761	504	455	539	611	18.6717362196402	21.2846062772676	14.949765746175	14.5579662679683	17.9882158196998	16.0060127086634	27.579049602027	27.3698666085594	21.3816376319483	18.1472431638495	23.6339594960301
ENSMUSG00000004105	956.996570558743	1090.51652575213	724.485390905102	939.819898849648	877.780944825247	775.226123400187	1321.13337676612	1414.54557217153	1364.06476016895	962.239244643017	1167.86244892337	935.604930483638	894.137575715176	1194.24172219277	-0.417168335801111	0.00046851347709592	0.0426572511021276	Angptl2	2	33106081	33137729	+	6286	protein_coding	angiopoietin-like 2 [Source:MGI Symbol;Acc:MGI:1347002]	-	911	1039	681	1146	1030	749	1248	1536	1253	930	1024	1086	13.6712112983021	15.6629085625163	10.3121775546396	13.2645988502681	12.545686143617	11.0255603060364	18.9359176077551	20.424008699092	19.6527462446088	13.7133625376788	16.6000511174004
ENSMUSG00000026447	531.548040288391	612.956353262025	509.586640592576	566.680235693811	607.62894530136	500.947187884767	717.731113339285	581.10563544286	632.499302201244	721.162100555035	751.583353359867	688.350220493948	554.891233837155	682.07195423204	-0.295934923827266	0.000477186060526834	0.0430330934012247	Pik3c2b	1	132973405	133036425	+	9592	protein_coding	phosphatidylinositol-4-phosphate 3-kinase catalytic subunit type 2 beta [Source:MGI Symbol;Acc:MGI:2685045]	-	506	584	479	691	713	484	678	631	581	697	659	799	4.97627465303254	5.7694567058612	4.75339593199215	5.24146580534632	5.69130591729227	4.66905962029613	6.74165727213854	5.49850136131323	5.97191358264668	6.73533177822452	7.00100019796994
ENSMUSG00000061808	0	9.44624517013394	1.06385519956696	0	0	7.2451039570111	73.0434318885113	26.7069150995926	2.17727814871341	5.17332927227429	366.097505961331	48.2448214614031	2.95920072111867	86.9072136386376	-4.886738457188	0.000481076661002708	0.0431783403131246	Ttr	18	20798337	20807378	+	1186	protein_coding	transthyretin [Source:MGI Symbol;Acc:MGI:98865]	-	0	9	1	0	0	7	69	29	2	5	321	56	0	0.719099624765509	0.0802588546607932	0	0	0.546143260813421	5.5489466368328	2.04379558487929	0.166261562999036	0.390769537579324	27.5806304221427
ENSMUSG00000021922	1.0504901981984	2.0991655933631	7.44698639696875	0	6.8177160763126	9.31513365901427	34.9338152510272	19.3394902445326	9.79775166921033	4.13866341781943	92.3797444949153	51.6908801372176	4.45491532064285	35.3800575357871	-2.99439202190407	0.000497743031700552	0.0444634789355899	Itih4	14	30608433	30624310	+	3690	protein_coding	inter alpha-trypsin inhibitor, heavy chain 4 [Source:MGI Symbol;Acc:MGI:109536]	-	1	2	7	0	8	9	33	21	9	4	81	60	0.0255644603360692	0.0513611656110746	0.180571547803226	0	0.165995070589683	0.225688469451121	0.852969928409576	0.475682392645582	0.24047099233763	0.100477543971616	2.23687902990617
ENSMUSG00000041695	801.52402122538	726.311295303632	688.314314119825	701.994619036037	757.618698980237	654.129385833002	1086.1240741683	1024.07205485334	621.612911457677	1091.57247644987	989.945903970204	887.360109022235	721.648722416352	950.114588320272	-0.396865682690893	0.000521588773022042	0.0457307786272752	Kcnj2	11	110956990	110967647	+	5444	protein_coding	potassium inwardly-rectifying channel, subfamily J, member 2 [Source:MGI Symbol;Acc:MGI:104744]	-	763	692	647	856	889	632	1026	1112	571	1055	868	1030	13.2211556102852	12.045344339141	11.3126359392216	11.4403557027902	12.503028322766	10.7421741741687	17.9752686903733	17.0730384529474	10.3410477619696	17.9626219142314	16.2474591632584
ENSMUSG00000056978	0	0	0	0	0	0	8.46880369721871	1.84185621376501	0	1.03466585445486	19.3883414372044	0.861514668953626	0	5.26586364526611	-4.86795997847364	0.000550487609763326	0.0480420937958427	Hamp2	7	30621797	30624106	-	583	protein_coding	hepcidin antimicrobial peptide 2 [Source:MGI Symbol;Acc:MGI:2153530]	-	0	0	0	0	0	0	8	2	0	1	17	1	0	0	0	0	0	0	1.30878279986749	0.286738222471975	0	0.158988909629187	2.97142116227292
ENSMUSG00000039384	349.813236000067	301.230262647605	411.711962232415	270.628766684454	239.47227718048	224.598222667344	511.304023219579	349.031752508469	293.93255007631	540.095576025435	556.559448315045	429.034305138906	299.575787902061	446.659609213958	-0.577075427197427	0.00056844922615508	0.0491565819402964	Dusp10	1	183745499	183807833	+	3042	protein_coding	dual specificity phosphatase 10 [Source:MGI Symbol;Acc:MGI:1927070]	-	333	287	387	330	281	217	483	379	270	522	488	498	10.3263780168152	8.94033780688631	12.1095889644708	7.89293651617872	7.07259322582745	6.60075710948923	15.1437721824411	10.4136780773735	8.75086747264158	15.9054763023708	16.3472407153053
ENSMUSG00000032593	64.0799020901025	67.1732989876191	79.7891399675223	59.8663635392882	65.6205172345087	54.855787103084	103.742845290929	104.985804184605	57.6978709409053	113.813243990034	93.5202351676921	133.534773687812	65.2308348203541	101.215795543663	-0.640020078224339	0.000573836813950394	0.0493969162845116	Amigo3	9	107930358	107932900	+	2543	protein_coding	adhesion molecule with Ig like domain 3 [Source:MGI Symbol;Acc:MGI:2444854]	-	61	64	75	73	77	53	98	114	53	110	82	155	2.26280156391892	2.38487079644345	2.8073240747454	2.08862455510879	2.31833363186427	1.92851374013876	3.67557985094521	3.74699090482352	2.05483077605061	4.00942146068413	3.28587726593462
ENSMUSG00000101257	72.4838236756896	106.007862464836	88.299981564058	100.050634956071	91.186952520681	114.886648461176	146.086863777023	163.925203025086	144.788996889441	95.1892586098469	136.858880733208	136.119317694673	95.4859839404186	137.161420121546	-0.522982745978258	0.000621170609351999	0.0526347170777618	2310015K22Rik	1	80202761	80207332	+	2284	lncRNA	RIKEN cDNA 2310015K22 gene [Source:MGI Symbol;Acc:MGI:1916815]	-	69	101	83	122	107	111	138	178	133	92	120	158	2.84981052809394	4.19040998502438	3.45907230083151	3.88640101314853	3.58689983148668	4.49697121047308	5.76274142844457	6.51400444369675	5.74119229954947	3.73359420178242	5.35388442651215
ENSMUSG00000085653	189.088235675712	222.511552896488	204.260198316857	204.201705770997	198.565980722604	207.002970200317	228.657699824905	243.125020216981	214.46189764827	293.845102665179	345.56867385135	314.452854168074	204.271773930496	273.351874729127	-0.420635264797734	0.000622567146764106	0.0526347170777618	Gm15179	1	75344855	75351664	-	944	lncRNA	predicted gene 15179 [Source:MGI Symbol;Acc:MGI:3705125]	-	180	212	192	249	233	200	216	264	197	284	303	365	17.987197622052	21.2811507596565	19.360068127668	19.1916021689513	18.8979848835927	19.6042950158813	21.8236759032989	23.3752400938065	20.5750445456678	27.8857115944107	32.7080369450617
ENSMUSG00000028356	2.1009803963968	4.1983311867262	0	0	0.852214509539075	0	23.2892101673514	10.1302091757075	6.53183444614022	0	72.9914030577109	24.1224107307015	1.19192101544368	22.8441779296019	-4.28194085108307	0.000632457881433281	0.0532332771492599	Ambp	4	63061512	63073036	-	1409	protein_coding	alpha 1 microglobulin/bikunin precursor [Source:MGI Symbol;Acc:MGI:88002]	-	2	4	0	0	1	0	22	11	6	0	64	28	0.133900438098077	0.269017318814571	0	0	0.0543401180337058	0	1.48921648253198	0.652538048514115	0.419842896487275	0	4.62863384155335
ENSMUSG00000018572	237.410784792839	178.429075435863	228.728867906897	227.164146580587	247.994422275871	195.6178068393	301.701131713416	270.752863423456	252.564265250755	301.087763646363	287.403649539737	266.208032706671	219.224183971893	279.952951046733	-0.34978110095087	0.000643937379475351	0.0538040973202568	Phf23	11	69886603	69890835	+	3273	protein_coding	PHD finger protein 23 [Source:MGI Symbol;Acc:MGI:1925496]	-	226	170	215	277	291	189	285	294	232	291	252	309	6.51366515510587	4.92191554962222	6.25273612892016	6.15768747824139	6.80735742623343	5.34329346097383	8.30510258600608	7.50802089950222	6.98857341617947	8.24104658885438	7.84582073428747
ENSMUSG00000027359	1.0504901981984	2.0991655933631	5.31927599783482	0	0	0	15.8790069322851	7.36742485506003	2.17727814871341	3.10399756336457	79.8343470943713	23.2608960617479	1.41148863156605	21.9371584425904	-3.99360436284392	0.000644921855090205	0.0538040973202568	Slc27a2	2	126394327	126430163	+	3754	protein_coding	solute carrier family 27 (fatty acid transporter), member 2 [Source:MGI Symbol;Acc:MGI:1347099]	-	1	2	5	0	0	0	15	8	2	3	70	27	0.0251286251039145	0.0504855357231926	0.126780769349628	0	0	0	0.381103675574095	0.178122944806778	0.052526961565492	0.0740734158075246	1.90014882372306
ENSMUSG00000034450	0	2.0991655933631	1.06385519956696	1.64017434354214	0	0	13.7618060079804	0	2.17727814871341	2.06933170890971	47.9006082566228	3.44605867581451	0.800532522745368	11.5591804663401	-3.83919911375474	0.000654375411217063	0.054115989247287	Gulo	14	66224235	66246656	-	2263	protein_coding	gulonolactone (L-) oxidase [Source:MGI Symbol;Acc:MGI:1353434]	-	0	2	1	2	0	0	13	0	2	2	42	4	0	0.0837484317741339	0.0420623073918254	0.0643027166464887	0	0	0.547904597889733	0	0.0871348712845148	0.0819182804364258	1.89124843594954
ENSMUSG00000022875	0	2.0991655933631	0	3.28034868708429	0	0	11.6446050836757	15.6557778170026	1.0886390743567	1.03466585445486	112.908576604896	14.6457493722116	0.896585713407897	26.1630023010997	-4.83297211246311	0.000662474345863144	0.0545475615737227	Kng1	16	22876615	22900828	+	3250	protein_coding	kininogen 1 [Source:MGI Symbol;Acc:MGI:1097705]	-	0	2	0	4	0	0	11	17	1	1	99	17	0	0.0583146772630354	0	0.089548952474464	0	0	0.322816311367316	0.43720961891073	0.0303363405718242	0.028520164404251	3.10409982303903
ENSMUSG00000030236	0	1.04958279668155	0	1.64017434354214	0	0	9.52740415937105	10.1302091757075	0	1.03466585445486	57.0245336388366	13.784234703258	0.448292856703949	15.2501745886047	-5.00824780228999	0.000685340842785952	0.0560535338795602	Slco1b2	6	141575244	141632372	+	4929	protein_coding	solute carrier organic anion transporter family, member 1b2 [Source:MGI Symbol;Acc:MGI:1351899]	-	0	1	0	2	0	0	9	11	0	1	50	16	0	0.0192252689292823	0	0.0295226309131678	0	0	0.174152549982368	0.186534004941446	0	0.0188051398486135	1.03370122659716
ENSMUSG00000105731	176.482353297331	149.04075712878	167.025266332013	65.6069737416857	191.748264646292	78.6611286761205	215.954494279077	232.994811041274	217.727814871341	195.551846491968	270.296289448086	226.578357934804	138.09412397037	226.517269011091	-0.715175289469276	0.00068668390854673	0.0560535338795602	Gm43063	3	103004062	103005142	+	1081	lncRNA	predicted gene 43063 [Source:MGI Symbol;Acc:MGI:5663200]	-	168	142	157	80	225	76	204	253	200	189	237	263	14.6604257646031	12.4478369828357	13.8245691540694	5.38453460762272	15.9363329506342	6.50550666798976	17.9990929641351	19.5622576671572	18.2410928507731	16.2058380992703	22.3412000550913
ENSMUSG00000042116	241.612745585632	212.015724929673	197.877067119455	200.101269912142	246.289993256793	201.827895945309	309.111334948483	310.352772019404	300.46438452245	254.527800195895	270.296289448086	230.885931279572	216.620782791501	279.273085402315	-0.36476386169665	0.000727633804841265	0.0581056200965643	Vwa1	4	155852606	155859155	-	3623	protein_coding	von Willebrand factor A domain containing 1 [Source:MGI Symbol;Acc:MGI:2179729]	-	230	202	186	244	289	195	292	337	276	246	237	268	5.98856127165937	5.28340955329599	4.88677402780909	4.90010483799682	6.10746629959786	4.98034588258822	7.68706695826119	7.77473713873744	7.51081907063932	6.29364378724777	6.66597771447796
ENSMUSG00000051043	460.1147068109	526.890563934138	330.858967065326	496.152738921498	509.624276704367	357.080123595547	746.313325817399	900.667688531089	621.612911457677	508.020934537335	755.004825378197	410.080982421926	446.786896171962	656.950111357271	-0.555084626017893	0.000730232209472083	0.0581056200965643	Gprc5c	11	114741978	114763443	+	5245	protein_coding	G protein-coupled receptor, family C, group 5, member C [Source:MGI Symbol;Acc:MGI:1917605]	-	438	502	311	605	598	345	705	978	571	491	662	476	7.87755807137497	9.06962783171042	5.64407197449284	8.39254660643064	8.72945764214983	6.08648884725664	12.8200515368812	15.5853841048366	10.7333963805839	8.67703571936769	12.8616397902157
ENSMUSG00000044408	219.552451423466	305.428593834331	252.13368229737	243.565890016008	219.019128951542	225.633237518346	312.28713633494	306.669059591874	309.173497117304	309.365090482002	274.858252139192	342.882838243543	244.222164006844	309.205978984809	-0.343421686367643	0.000735844448126672	0.0581063926774491	Sptssa	12	54692177	54703358	-	1518	protein_coding	serine palmitoyltransferase, small subunit A [Source:MGI Symbol;Acc:MGI:1913399]	-	209	291	237	297	257	218	295	333	284	299	241	398	12.9878573489986	18.1657134458221	14.8612117165778	14.2353633689026	12.9626239535832	13.288560869263	18.5351622064567	18.335662639159	18.4456141948575	18.2572264557516	16.1781596358534
ENSMUSG00000024665	35.7166667387456	41.983311867262	45.7457735813794	31.1633125273007	40.0540819483365	31.0504455300476	61.3988268048356	51.5719739854203	74.0274570562558	38.2826366148297	80.974837767148	66.3366295094292	37.6189320321786	62.0987269563198	-0.723025398389465	0.000739446648815357	0.0581063926774491	Fads2	19	10040129	10079110	-	3295	protein_coding	fatty acid desaturase 2 [Source:MGI Symbol;Acc:MGI:1930079]	-	34	40	43	38	47	30	58	56	68	37	71	77	0.973389133160315	1.15036540883074	1.24219759332053	0.839096785325971	1.0921291764935	0.842478960318297	1.67887638826705	1.42055075679288	2.03469841164587	1.04083452795484	2.19576963616823
ENSMUSG00000038777	2296.3715732617	2792.9398219696	2461.76093179795	2497.98552521468	1978.84209114973	2195.26649897436	3482.79552048119	2780.28195467828	3729.67746874606	2790.49380946475	3592.54561924671	2235.63056593466	2370.52774039467	3101.90415642528	-0.387692891408108	0.000768104371689008	0.0593729003716181	Sema6c	3	95067768	95081335	+	5935	protein_coding	sema domain, transmembrane domain (TM), and cytoplasmic domain, (semaphorin) 6C [Source:MGI Symbol;Acc:MGI:1338032]	-	2186	2661	2314	3046	2322	2121	3290	3019	3426	2697	3150	2595	34.7450090964192	42.4869340893046	37.1125057736309	37.3416114162155	29.9552578754236	33.0683993124497	52.8714621933833	42.517384194929	56.9132239422032	42.1207027875924	54.0846067045554
ENSMUSG00000058207	4.2019607927936	0	0	0.820087171771072	0.852214509539075	6.21008910600951	47.6370207968552	19.3394902445326	4.35455629742681	0	159.668694188743	18.9533227169798	2.01405859668554	41.6588473740895	-4.37877036142006	0.000830894329533646	0.0623509277582535	Serpina3k	12	104304745	104312403	+	2057	protein_coding	serine (or cysteine) peptidase inhibitor, clade A, member 3K [Source:MGI Symbol;Acc:MGI:98377]	-	4	0	0	1	1	6	45	21	4	0	140	22	0.183437741643355	0	0	0.0353711832209538	0.0372217920804528	0.269904538089333	2.08652872839837	0.853314549762857	0.191722132928398	0	6.9354970192089
ENSMUSG00000062181	0	0	0	0	0	0	2.11720092430468	0.920928106882504	1.0886390743567	1.03466585445486	15.9668694188743	3.44605867581451	0	4.09572700911458	-4.50378884093811	0.000834258291050223	0.0623509277582535	Ces3b	8	105810385	105820561	+	2565	protein_coding	carboxylesterase 3B [Source:MGI Symbol;Acc:MGI:3644960]	-	0	0	0	0	0	0	2	1	1	1	14	4	0	0	0	0	0	0	0.0743684573413984	0.0325864295713765	0.0384378584243386	0.0361366605511952	0.5561917102734
ENSMUSG00000066154	0	3.14874839004465	0	0	0	0	24.3478106295038	16.5767059238851	1.0886390743567	0	157.387712843189	18.9533227169798	0.524791398340775	36.3923651979857	-6.16070204032707	0.000836262311257598	0.0623509277582535	Mup3	4	62001713	62005579	-	1068	protein_coding	major urinary protein 3 [Source:MGI Symbol;Acc:MGI:97235]	-	0	3	0	0	0	0	23	18	1	0	138	22	0	0.266183568967507	0	0	0	0	2.05401083373399	1.40872233456035	0.0923156431258694	0	13.1671468489483
ENSMUSG00000061013	10.504901981984	17.8429075435863	10.6385519956696	21.3222664660479	10.2265741144689	9.31513365901427	44.4612194103982	60.7812550542453	29.393255007631	17.5893195257326	20.5288321099812	18.9533227169798	13.3083892934618	31.9512006374947	-1.2586308162134	0.000847700822847859	0.06271177135547	Mkx	18	6934518	7004780	-	4095	protein_coding	mohawk homeobox [Source:MGI Symbol;Acc:MGI:2687286]	Homeobox	10	17	10	26	12	9	42	66	27	17	18	22	0.230361071160184	0.393392664076033	0.232446890421736	0.461958881812711	0.224366963544297	0.203367631813098	0.978231246567626	1.34714448403867	0.650064440824803	0.384795868946244	0.447922052386584
ENSMUSG00000021281	319.349020252314	289.684851884108	262.77223429304	264.888156482056	231.802346594628	142.832049438219	745.254725355246	817.784158911664	321.148526935227	265.909124594898	563.402392351706	376.481910332735	251.888109824061	514.996806413579	-1.03192455632277	0.000851036288856046	0.06271177135547	Tnfaip2	12	111408903	111421452	+	4984	protein_coding	tumor necrosis factor, alpha-induced protein 2 [Source:MGI Symbol;Acc:MGI:104960]	-	304	276	247	323	272	138	704	888	295	257	494	437	5.75385012572009	5.24761893107371	4.7173333471192	4.71528956962623	4.17851957387273	2.56208940640939	13.4722698162925	14.8922075367808	5.83566744045674	4.77958814579668	10.1002648189138
ENSMUSG00000040660	0	1.04958279668155	0	0	0	0	9.52740415937105	5.52556864129503	0	0	21.6693227827579	0.861514668953626	0.174930466113592	6.26396837539627	-4.64053587040276	0.000868610295497166	0.0637586890547494	Cyp2b9	7	25872836	25910086	+	1876	protein_coding	cytochrome P450, family 2, subfamily b, polypeptide 9 [Source:MGI Symbol;Acc:MGI:88600]	-	0	1	0	0	0	0	9	6	0	0	19	1	0	0.0505124469895696	0	0	0	0	0.457568187027234	0.267326839607401	0	0	1.03205920652506
ENSMUSG00000050440	0	0	0	0	0	0	2.11720092430468	3.68371242753002	3.26591722307011	0	23.9503041283114	0	0	5.50285578386936	-4.93212348680063	0.000898869878292217	0.0652214473375403	Hamp	7	30641793	30643457	-	410	protein_coding	hepcidin antimicrobial peptide [Source:MGI Symbol;Acc:MGI:1933533]	-	0	0	0	0	0	0	2	4	3	0	21	0	0	0	0	0	0	0	0.465256324587041	0.815455530249569	0.721412977012891	0	5.21938440311441
ENSMUSG00000002228	598.779412973088	693.774228606504	654.270947733683	588.82258933163	611.890017849056	638.604163067978	761.133732287531	646.491531031518	726.122262595921	772.895393277778	870.194383328647	758.132908679191	631.02355992699	755.828368533431	-0.2602124576804	0.000913516276222869	0.0655982593527172	Ppm1j	3	104688372	104693334	+	1814	protein_coding	protein phosphatase 1J [Source:MGI Symbol;Acc:MGI:1919137]	-	570	661	615	718	718	617	719	702	667	747	763	880	29.6415266950685	34.5299077812337	32.2712271229526	28.7985778113508	30.3053100828086	31.4732150590133	37.8039999793313	32.3462528550759	36.2522614523549	38.1696963243773	42.8618686099197
ENSMUSG00000069844	122.907353189213	122.801187211741	113.832506353665	97.5903734407575	69.8815897822041	93.1513365901427	138.676660541956	180.501908948971	125.193493551021	143.818553769225	130.015936696547	161.964757763282	103.360724427954	146.695218545167	-0.513641705109411	0.000913732592101559	0.0655982593527172	Sco1	11	66943496	66957896	+	3925	protein_coding	SCO1 cytochrome c oxidase assembly protein [Source:MGI Symbol;Acc:MGI:106362]	-	117	117	107	119	82	90	131	196	115	139	114	188	2.81196037220156	2.82473325213621	2.59490679596535	2.20592722098719	1.59957925028746	2.12175911407551	3.18330155332102	4.17388575865321	2.88871523279472	3.28254376296061	2.95970915379518
ENSMUSG00000030895	0	4.1983311867262	2.12771039913393	2.46026151531322	7.66993058585167	6.21008910600951	58.2230254183786	14.7348497101201	0	10.3466585445486	145.982806115422	28.4299840754697	3.77772046550575	42.9528873106564	-3.50076034274629	0.000936949171725681	0.0667065541884998	Hpx	7	105240820	105249344	-	1499	protein_coding	hemopexin [Source:MGI Symbol;Acc:MGI:105112]	-	0	4	2	3	9	6	55	16	0	10	128	33	0	0.252865511814363	0.127000669283123	0.145614123853573	0.45969782307233	0.370376007237997	3.49950971295456	0.892159486063571	0	0.618349128177557	8.70146108438782
ENSMUSG00000022445	0	3.14874839004465	1.06385519956696	3.28034868708429	0	6.21008910600951	14.8204064701327	15.6557778170026	8.70911259485362	1.03466585445486	90.0987631493618	16.3687787101189	2.2838402304509	24.4479174326541	-3.42168333321658	0.000941408618459649	0.0667730202861005	Cyp2d26	15	82674302	82678495	-	1792	protein_coding	cytochrome P450, family 2, subfamily d, polypeptide 26 [Source:MGI Symbol;Acc:MGI:1923529]	-	0	3	1	4	0	6	14	17	8	1	79	19	0	0.158640653826617	0.0531177464440295	0.162407419387281	0	0.309817876590266	0.745137082346433	0.792930391439662	0.440147798475127	0.0517246285233347	4.49234324024436
ENSMUSG00000004698	133.412255171197	118.602856025015	89.3638367636249	102.510896471384	72.4382333108213	87.9762623351347	181.02067902805	243.125020216981	162.207222079149	98.2932561732114	140.280352751538	128.36568567409	100.717390012863	158.88203598717	-0.660667837394972	0.00100323390588905	0.0701079103679959	Hdac9	12	34097579	34967094	-	14838	protein_coding	histone deacetylase 9 [Source:MGI Symbol;Acc:MGI:1931221]	-	127	113	84	125	85	85	171	264	149	95	123	149	0.807404842114307	0.721662799058153	0.538866972417231	0.612940792942967	0.438606566673863	0.530074346972069	1.09917512187618	1.48714292010738	0.990050742816137	0.593449303127948	0.844721581810729
ENSMUSG00000029369	0	0	0	0	0	0	4.23440184860935	0	6.53183444614022	0	20.5288321099812	0.861514668953626	0	5.35943051228073	-4.8931592224811	0.00104271015327036	0.07206877694392	Afm	5	90666791	90701402	+	3038	protein_coding	afamin [Source:MGI Symbol;Acc:MGI:2429409]	-	0	0	0	0	0	0	4	0	6	0	18	1	0	0	0	0	0	0	0.125579389783204	0	0.194719763380701	0	0.603765900106341
ENSMUSG00000021265	91.3926472432609	116.503690431652	108.51323035583	121.372901422119	77.5515203680558	89.0112771861363	141.852461928413	104.985804184605	168.739056525289	132.437229370222	166.511638225403	144.734464384209	100.724211167842	143.210109103024	-0.504952532205762	0.00105361849148314	0.0720883387488529	Slc25a29	12	108791799	108801809	-	2606	protein_coding	solute carrier family 25 (mitochondrial carrier, palmitoylcarnitine transporter), member 29 [Source:MGI Symbol;Acc:MGI:2444911]	-	87	111	102	148	91	86	134	114	155	128	146	168	3.14925506588192	4.03626627448964	3.72566161397754	4.13210342864708	2.67361304457549	3.05363600646451	4.90429441151421	3.65640747159103	5.86413337032096	4.55272002769318	5.7090295356947
ENSMUSG00000035540	0	14.6941591535417	0	4.92052303062643	0	2.07002970200317	81.5122355857301	37.7580523821827	4.35455629742681	3.10399756336457	246.345985319774	54.2754241440785	3.61411864769521	71.2250418820928	-4.30292612474056	0.00105441281198819	0.0720883387488529	Gc	5	89565381	89605757	-	1845	protein_coding	vitamin D binding protein [Source:MGI Symbol;Acc:MGI:95669]	-	0	14	0	6	0	2	77	41	4	3	216	63	0	0.719056318555044	0	0.236613085806511	0	0.10030598642272	3.98052633257802	1.85742648556846	0.213751993189005	0.150716315957424	11.9300214928329
ENSMUSG00000055435	3687.22059567639	4079.72833070118	2968.15600679183	3737.95732893254	3938.08324858006	3317.22259746008	5379.80754865818	5138.77883640437	5006.65110296648	3563.38920274253	5435.57854645391	3597.68525755034	3621.39468469035	4686.9817491293	-0.371873939503988	0.00107114067840113	0.0727070328586404	Maf	8	116409681	116434533	-	8241	protein_coding	avian musculoaponeurotic fibrosarcoma oncogene homolog [Source:MGI Symbol;Acc:MGI:96909]	TF_bZIP	3510	3887	2790	4558	4621	3205	5082	5580	4599	3444	4766	4176	40.1781742296729	44.6957128500553	32.2256685525161	40.2418822800774	42.932642977328	35.9866440094946	58.8167323768991	56.5950479949328	55.0211986945653	38.7363426983111	58.9329212633103
ENSMUSG00000002588	9.45441178378561	4.1983311867262	2.12771039913393	2.46026151531322	4.26107254769537	3.10504455300476	19.0548083187421	9.20928106882504	8.70911259485362	4.13866341781943	41.0576642199624	12.9227200343044	4.26780533094318	15.8487082757512	-1.89412246150897	0.00107904751176471	0.0729821492064291	Pon1	6	5168090	5193946	-	2898	protein_coding	paraoxonase 1 [Source:MGI Symbol;Acc:MGI:103295]	-	9	4	2	3	5	3	18	10	8	4	36	15	0.292959188323277	0.13079551491019	0.0656915125104905	0.0753193829042464	0.13210011440561	0.0957891019409519	0.592407121368593	0.288420261734233	0.272168686979789	0.127937245429697	1.26586666978817
ENSMUSG00000097415	81.9382354594753	54.5783054274406	91.4915471627589	111.531855360866	56.2461576295789	75.5560841231157	128.090655920433	132.613647391081	97.9775166921033	123.125236680128	161.949675534296	90.4590402401308	78.5570308605392	122.369295409695	-0.635067393639778	0.0010856062048372	0.0731644494918398	AU020206	7	75418786	75431869	-	3211	lncRNA	expressed sequence AU020206 [Source:MGI Symbol;Acc:MGI:2142134]	-	78	52	86	136	66	73	121	144	90	119	142	105	2.29148644469867	1.53459677007988	2.54938715041491	3.0816441134937	1.57374803376719	2.10366113069824	3.59410872979806	3.74840349625775	2.76343183346576	3.43512101630149	4.5064222679379
ENSMUSG00000038949	921.279903819997	976.112000913841	978.746783601607	895.53519157401	978.342256950858	989.474197557515	1286.19956151509	1138.26714010678	989.572918590243	1019.14586663803	1132.5072380673	1183.72115514228	956.581722402971	1124.90231334329	-0.234551387691457	0.00109394481185176	0.0734649888186118	Cnst	1	179373935	179455043	+	8859	protein_coding	consortin, connexin sorting protein [Source:MGI Symbol;Acc:MGI:2445141]	-	877	930	920	1092	1148	956	1215	1236	909	985	993	1374	9.3385164270644	9.94785596723809	9.88509329467036	8.96854137972324	9.92176089889335	9.98542188577281	13.0809029288314	11.6615939866032	10.1163939648167	10.3059235014232	11.4221640195871
ENSMUSG00000018677	626.092158126247	658.088413519331	737.251653299906	572.420845896208	605.924516282282	730.720484807119	716.672512877133	852.779426973199	813.213388544457	792.554044512421	759.566788069304	763.301996692913	655.083011988516	783.014692944904	-0.259432786264248	0.00111089181751806	0.0740865526782632	Slc25a39	11	102293811	102298772	-	2756	protein_coding	solute carrier family 25, member 39 [Source:MGI Symbol;Acc:MGI:1196386]	-	596	627	693	698	711	706	677	926	747	766	666	886	20.399994103591	21.5585510872189	23.9349028040626	18.4272313759363	19.7524948860843	23.7038404816116	23.4290997851279	28.0838032124956	26.723167932963	25.7623183179909	24.6251486819134
ENSMUSG00000020051	0	1.04958279668155	0	0	0	0	17.9962078565898	12.8929934963551	0	0	75.2723844032643	6.89211735162901	0.174930466113592	18.8422838513064	-6.23597389452333	0.00114729202848863	0.0759699875367753	Pah	10	87357657	87419998	+	2201	protein_coding	phenylalanine hydroxylase [Source:MGI Symbol;Acc:MGI:97473]	-	0	1	0	0	0	0	17	14	0	0	66	8	0	0.0430537712641675	0	0	0	0	0.736673462601472	0.531657740076389	0	0	3.05567906251002
ENSMUSG00000019539	115.553921801824	101.80953127811	118.087927151933	87.7493273795047	101.41352663515	68.3109801661046	140.793861466261	178.660052735206	235.146040061048	139.679890351406	92.3797444949153	132.673259018858	98.8208690687711	153.222141354616	-0.634236164094939	0.00120952607016475	0.0792595318919727	Rcn3	7	44732337	44741645	-	1717	protein_coding	reticulocalbin 3, EF-hand calcium binding domain [Source:MGI Symbol;Acc:MGI:1277122]	-	110	97	111	107	119	66	133	194	216	135	81	154	6.04345629027983	5.35343681047522	6.15361513143552	4.53416543724445	5.30650083333109	3.55686079402873	7.38801030277559	9.4439913913877	12.4030932332094	7.28784049642698	4.80727060008957
ENSMUSG00000094806	0	2.0991655933631	0	0	0	0	9.52740415937105	3.68371242753002	0	1.03466585445486	20.5288321099812	2.58454400686088	0.349860932227183	6.22652642636633	-4.14952097780686	0.00123317406113871	0.0805305185167062	Cyp2d10	15	82287047	82291396	-	1648	protein_coding	cytochrome P450, family 2, subfamily d, polypeptide 10 [Source:MGI Symbol;Acc:MGI:88602]	-	0	2	0	0	0	0	9	4	0	1	18	3	0	0.115001639019942	0	0	0	0	0.520872523581973	0.202874252064517	0	0.0562442562583834	1.11301019691933
ENSMUSG00000025396	0	0	0	0	0	0	8.46880369721871	8.28835296194254	0	0	3.4214720183302	5.16908801372176	0	4.22461944853553	-4.56656975548477	0.00129836254271925	0.0836339790272692	Hsd17b6	10	127826805	127843480	-	1575	protein_coding	hydroxysteroid (17-beta) dehydrogenase 6 [Source:MGI Symbol;Acc:MGI:1351670]	-	0	0	0	0	0	0	8	9	0	0	3	6	0	0	0	0	0	0	0.484457379252538	0.47762395343189	0	0	0.194099556034187
ENSMUSG00000039159	1292.10294378403	1196.52438821697	1196.83709951283	1139.10108159002	1293.66162548032	1125.06114303872	1552.96687797748	1644.77759889215	1425.02854833292	1214.69771313	1463.24953317255	1317.25592883009	1207.21471360381	1436.32936672253	-0.250672699926563	0.00130792519872098	0.0839643641131454	Ube2h	6	30211288	30304538	-	4780	protein_coding	ubiquitin-conjugating enzyme E2H [Source:MGI Symbol;Acc:MGI:104632]	-	1230	1140	1125	1389	1518	1087	1467	1786	1309	1174	1283	1529	24.273936428309	22.5999873702454	22.4027985002434	21.1425919826281	24.3150655936837	21.0423807908538	29.2717281955406	31.2304114320371	26.9996604346617	22.7654157498786	27.3515917271396
ENSMUSG00000028001	0	5.24791398340775	2.12771039913393	0	0	0	49.7542217211599	20.2604183514151	3.26591722307011	0	125.453974005441	27.568469406516	1.22927073042361	37.7171667846003	-4.96257221650692	0.00133167820259657	0.0846285966468919	Fga	3	82933383	82940934	+	3010	protein_coding	fibrinogen alpha chain [Source:MGI Symbol;Acc:MGI:1316726]	-	0	5	2	0	0	0	47	22	3	0	110	32	0	0.157410881316333	0.063247177161263	0	0	0	1.48928394930104	0.61091435904079	0.0982655550084005	0	3.72400310995823
ENSMUSG00000090066	2662.99265243295	2749.90692730566	1864.93816484089	2348.72965995235	2773.95822854969	1767.80536551071	4241.81205184442	4271.26455972106	2809.77745091465	2663.2299093668	4621.26820609132	2805.95327678196	2361.38849976537	3568.88424245337	-0.595718669861646	0.00133872028627224	0.0847915878977379	1110002E22Rik	3	137770813	137787267	+	9998	protein_coding	RIKEN cDNA 1110002E22 gene [Source:MGI Symbol;Acc:MGI:1915066]	-	2535	2620	1753	2864	3255	1708	4007	4638	2581	2574	4052	3257	23.9181632979237	24.8324403328039	16.6896193091978	20.8422096827443	24.9269665570509	15.8076736734578	38.2254279843125	38.7741030008996	25.4519712744153	23.8633161956153	41.2990583668259
ENSMUSG00000020866	31.514705945952	20.991655933631	32.9795111865759	26.2427894966743	37.4974384197193	25.8753712750396	75.160632812816	74.5951766574829	56.6092318665485	43.455965887104	33.0742295105252	32.7375574202378	29.1835787095987	52.6054656924524	-0.848024447502483	0.00137190162382794	0.0864570687213388	Cacna1g	11	94299217	94365024	-	10137	protein_coding	calcium channel, voltage-dependent, T type, alpha 1G subunit [Source:MGI Symbol;Acc:MGI:1201678]	-	30	20	31	32	44	25	71	81	52	42	29	38	0.279173893578263	0.18696133087192	0.291091748096944	0.229680651507948	0.332334019691982	0.228204282516917	0.668028588770286	0.66788197098718	0.505755307944982	0.384038911036822	0.291522712895382
ENSMUSG00000087408	185.936765081117	187.875320605997	175.536107928549	136.134470513998	219.019128951542	192.512762286295	227.599099362753	220.101817544919	228.614205614908	209.002502599881	282.84168684863	285.16135542365	182.835759227916	242.220111232457	-0.407166068441768	0.00137414603892296	0.0864570687213388	Cers1	8	70768425	70784242	+	3171	protein_coding	ceramide synthase 1 [Source:MGI Symbol;Acc:MGI:2136690]	-	177	179	165	166	257	186	215	239	210	202	248	331	5.26550488151903	5.34919008164157	4.9529660260393	3.80886627719752	6.20538100332365	5.42762620004493	6.46678413944303	6.29978614074072	6.52934482506149	5.90460041986464	7.9696506451123
ENSMUSG00000039428	309.894608468528	358.95731646509	336.17824306316	323.934432849573	322.13708460577	322.924633512495	430.850388096002	407.971151348949	433.278351593968	376.618371021568	356.973580579117	365.282219636338	329.004386494103	395.162343712657	-0.264491313142783	0.00142934429537633	0.0887505648060226	Tmem135	7	88788922	89053430	-	7572	protein_coding	transmembrane protein 135 [Source:MGI Symbol;Acc:MGI:1920009]	-	295	342	316	395	378	312	407	443	398	364	313	424	3.67514438706129	4.28002930387374	3.9724105275163	3.79551200934671	3.82219434033119	3.8127402287622	5.12660610696247	4.89009468962062	5.18225786181386	4.4558048719267	4.21228335252479
ENSMUSG00000045414	105.04901981984	71.3716301743453	77.6614295683883	92.6698504101311	115.048958787775	56.9258168050872	181.02067902805	136.297359818611	126.282132625378	110.70924642667	110.627595259343	113.719936301879	86.4544509275945	129.776158243322	-0.581254986855062	0.00146440747356715	0.0903353378971162	Dipk2a	9	94399917	94420134	-	3950	protein_coding	divergent protein kinase domain 2A [Source:MGI Symbol;Acc:MGI:1916111]	-	100	68	73	113	135	55	171	148	116	107	97	132	2.38817363645811	1.63133464242162	1.75915218198029	2.0814463795093	2.61678621564085	1.28842404711969	4.12900264769588	3.13176212503442	2.89539250520955	2.51085751179197	2.50241009899771
ENSMUSG00000074768	0	4.1983311867262	0	0.820087171771072	0	3.10504455300476	9.52740415937105	3.68371242753002	1.0886390743567	5.17332927227429	72.9914030577109	20.676352054887	1.35391048525034	18.856806674355	-3.81714600232433	0.00147205558836851	0.0905123010796196	Bhmt	13	93753183	93774469	-	5758	protein_coding	betaine-homocysteine methyltransferase [Source:MGI Symbol;Acc:MGI:1339972]	-	0	4	0	1	0	3	9	4	1	5	64	24	0	0.0658293508526798	0	0.0126360757008513	0	0.0482106317167209	0.149079180073479	0.0580647390417373	0.0171228042477299	0.0804884806476344	1.13264068821616
ENSMUSG00000072214	6.3029411891904	7.34707957677084	7.44698639696875	4.92052303062643	4.26107254769537	3.10504455300476	9.52740415937105	17.4976340307676	17.4182251897072	12.4159902534583	5.70245336388366	30.1530134133769	5.56394121570943	15.4524534017608	-1.49801571628463	0.00154688540540176	0.0941958707636609	Septin5	16	18439252	18448704	-	3915	protein_coding	septin 5 [Source:MGI Symbol;Acc:MGI:1195461]	-	6	7	7	6	5	3	9	19	16	12	5	35	0.144571430866046	0.169432810694005	0.170193872642121	0.11150731629962	0.0977844525025434	0.0709059559195092	0.219258727678951	0.405644864664377	0.402934791758584	0.284108917436983	0.130143380482692
ENSMUSG00000050390	51.4740197117216	49.3303914440328	36.1710767852768	33.6235740426139	36.6452239101802	33.1204752320507	79.3950346614254	57.0975426267153	83.8252087254661	66.2186146851109	61.5864963299435	39.6296747718668	40.0607935209793	64.6254286334213	-0.688807733905175	0.00155414893232723	0.0943348476936319	C77080	4	129113371	129155197	-	5770	protein_coding	expressed sequence C77080 [Source:MGI Symbol;Acc:MGI:2140651]	-	49	47	34	41	43	32	75	62	77	64	54	46	0.80109360023651	0.771886217671461	0.560893943733419	0.517001642860586	0.57059007475011	0.51317724769475	1.23974280598367	0.898131697527905	1.31571390434991	1.02810991266624	0.953678061277156
ENSMUSG00000000184	147.068627747776	98.6607828880656	130.854189546737	117.272465563263	155.955255245651	98.3264108451506	255.122711378714	291.934209881754	179.625447268856	124.159902534583	158.528203515966	147.31900839107	124.689621972774	192.781580495157	-0.628279989975704	0.00157423222928793	0.09524859411583	Ccnd2	6	127102125	127129156	-	9409	protein_coding	cyclin D2 [Source:MGI Symbol;Acc:MGI:88314]	-	140	94	123	143	183	95	241	317	165	120	139	171	1.40361358376165	0.946707083848301	1.24434065258871	1.10579965093281	1.48915255761898	0.934272067714014	2.44297892615823	2.8160472756546	1.72896828904673	1.1821515695247	1.50541131911943
ENSMUSG00000003053	0	0	0	0	0	0	8.46880369721871	0	3.26591722307011	0	9.12392538221386	4.30757334476813	0	4.1943699412118	-4.54392399885289	0.0015804370631357	0.0953194812154902	Cyp2c29	19	39257849	39319157	+	3061	protein_coding	cytochrome P450, family 2, subfamily c, polypeptide 29 [Source:MGI Symbol;Acc:MGI:103238]	-	0	0	0	0	0	0	8	0	3	0	8	5	0	0	0	0	0	0	0.249271601542877	0	0.0966283307988518	0	0.266324121314467
ENSMUSG00000016942	0	1.04958279668155	0	0.820087171771072	0.852214509539075	0	4.23440184860935	7.36742485506003	0	0	39.9171735471856	0.861514668953626	0.453647412998616	8.73008581996811	-4.18543464938265	0.00159751925433109	0.0957399355649436	Tmprss6	15	78323867	78352834	-	3359	protein_coding	transmembrane serine protease 6 [Source:MGI Symbol;Acc:MGI:1919003]	-	0	1	0	1	1	0	4	8	0	0	35	1	0	0.0282111790867617	0	0.0216607692424835	0.0227940536795152	0	0.113578501387727	0.199069227390487	0	0	1.06179795835909
ENSMUSG00000032705	676.51568763977	778.79043513771	775.550440484316	704.454880551351	743.131052318073	656.199415535005	962.267820096476	936.583884699507	777.288299090686	699.434117611483	1113.11889663009	911.482519752937	722.440318611037	900.02925631353	-0.316921287260262	0.00163418535628016	0.0971717443670264	Exd2	12	80509869	80547001	+	8337	protein_coding	exonuclease 3'-5' domain containing 2 [Source:MGI Symbol;Acc:MGI:1922485]	-	644	742	729	859	872	634	909	1017	714	676	976	1058	7.28683710737931	8.43383976369257	8.32329665186445	7.49665011606648	8.00826164590099	7.03675911588394	10.3992071254855	10.196128476915	8.44374214908455	7.51574921388263	11.9295445018493
ENSMUSG00000026417	0	4.1983311867262	1.06385519956696	0	0	2.07002970200317	17.9962078565898	10.1302091757075	0	1.03466585445486	93.5202351676921	41.3527041097741	1.22203601471606	27.3390036940364	-4.50848969544336	0.00164186712982885	0.0971717443670264	Pigr	1	130754421	130779986	+	4025	protein_coding	polymeric immunoglobulin receptor [Source:MGI Symbol;Acc:MGI:103080]	-	0	4	1	0	0	2	17	11	0	1	82	48	0	0.0941727707353367	0.0236489445037766	0	0	0.0459787689316569	0.402836842530643	0.228428847293513	0	0.0230287041773455	2.0760213384526
ENSMUSG00000037085	87.1906864504673	79.7682925477977	60.6397463753169	72.1676711158543	78.4037348775949	71.4160247191094	105.860046215234	90.2509544744854	105.5979902126	104.501251299941	108.34661391379	97.3511575917598	74.9310260143567	101.984668951302	-0.441767398154647	0.00164706568496227	0.0971717443670264	Trmt12	15	58744523	58748976	+	4454	protein_coding	tRNA methyltransferase 12 [Source:MGI Symbol;Acc:MGI:1915510]	-	83	76	57	88	92	69	100	98	97	101	95	113	1.75788667874448	1.61694266771102	1.21815426420722	1.43752808754472	1.58149995969313	1.43348154485232	2.14139080692284	1.8390774138655	2.14717812421813	2.10187336454769	2.17348795626517
ENSMUSG00000027544	266.824510342394	339.01524332814	279.793917486111	308.352776585923	204.531482289378	228.73828207135	496.483616749447	395.999085959477	285.223437481456	302.122429500818	427.684002291275	337.713750229822	271.209368683883	374.204387035382	-0.464545796308816	0.00167974839969584	0.0984863009084826	Nfatc2	2	168318330	168443577	-	10578	protein_coding	nuclear factor of activated T cells, cytoplasmic, calcineurin dependent 2 [Source:MGI Symbol;Acc:MGI:102463]	RHD	254	323	263	376	240	221	469	430	262	292	375	392	2.26513009024241	2.89354473704251	2.36662709662368	2.58623605416419	1.73715771547343	1.93322293599604	4.22878326029695	3.39773137603987	2.44199224776974	2.55867234067255	3.61253073305261
ENSMUSG00000022075	501.083824540637	535.28722630759	404.264975835446	505.993784982751	539.451784538234	423.321074059648	723.024115650047	682.407727199936	607.46060349104	481.119622321509	801.764942962043	513.462742696361	484.900445044051	634.873292386823	-0.387113568651585	0.00170458915761745	0.0996342884782692	Rhobtb2	14	70022439	70043085	-	10124	protein_coding	Rho-related BTB domain containing 2 [Source:MGI Symbol;Acc:MGI:2180557]	-	477	510	380	617	633	409	683	741	558	465	703	596	4.4445647541807	4.77363579432444	3.57280330092121	4.43421663743133	4.7872173304927	3.7382160650196	6.43449864550124	6.11772877926515	5.43411236932073	4.2573190888902	7.07598712399421
ENSMUSG00000074305	262.6225495496	272.891527137203	296.815600679183	300.151904868212	311.058295981762	245.298519687376	352.513953896729	395.078157852594	314.616692489087	334.197070988919	467.60117583846	302.391648802723	281.473066317223	361.066449978085	-0.356260734452637	0.00177041135654299	0.102247716433082	Peak1	9	56108410	56325351	-	12351	protein_coding	pseudopodium-enriched atypical kinase 1 [Source:MGI Symbol;Acc:MGI:2442366]	-	250	260	279	366	365	237	333	429	289	323	410	351	1.90941742855022	1.99481427768055	2.15020431172606	2.15606993296848	2.26267570261229	1.77557676111776	2.57151024191842	2.90321579660749	2.30697173363176	2.42401769762469	3.38271633360527
ENSMUSG00000038742	37.8176471351424	53.528722630759	45.7457735813794	48.3851431344932	50.2806560628054	60.0308613580919	91.0396397451011	63.5440393748928	74.0274570562558	73.4612756662949	77.5533657488178	57.721482819893	49.2981339837786	72.8912100685426	-0.558793605621252	0.00178042969117087	0.102247716433082	Angptl6	9	20785104	20791023	-	1582	protein_coding	angiopoietin-like 6 [Source:MGI Symbol;Acc:MGI:1917976]	-	36	51	43	59	59	58	86	69	68	71	68	67	2.1466390082449	3.05488551085592	2.58725731352158	2.7134974141875	2.85546672077117	3.39246005281141	5.18487294719946	3.64558106048677	4.23788322779591	4.15994180548731	4.38012272466527
ENSMUSG00000030089	1161.84215920743	1372.85429805947	1329.8189994587	1061.19280027177	1332.01127840957	1168.53176678079	1679.99893343576	1558.2103568452	1935.60027420622	1136.06310819143	1630.90166207073	1429.25283579407	1237.70855036462	1561.67119509057	-0.335327785788205	0.00182064330057666	0.10416719887106	Slc41a3	6	90581707	90623394	+	2911	protein_coding	solute carrier family 41, member 3 [Source:MGI Symbol;Acc:MGI:1918949]	-	1106	1308	1250	1294	1563	1129	1587	1692	1778	1098	1430	1659	35.8406532655257	42.5791296882796	40.8738413035472	32.3426760246787	41.1100820067795	35.8876453535656	51.9973089520869	48.5827731402208	60.2193555459587	34.9619397720954	50.0584822029081
ENSMUSG00000022877	0	0	0	0	0	0	28.5822124781131	20.2604183514151	0	0	67.2889496938272	8.61514668953626	0	20.7911212021486	-6.85948636969833	0.00183965805730424	0.104938085208517	Hrg	16	22769822	22780406	+	1994	protein_coding	histidine-rich glycoprotein [Source:MGI Symbol;Acc:MGI:2146636]	-	0	0	0	0	0	0	27	22	0	0	59	10	0	0	0	0	0	0	1.29147129217115	0.922192688421654	0	0	3.01516236116295
ENSMUSG00000059493	38.8681373333408	38.8345634772173	45.7457735813794	25.4227023249032	75.8470913489776	53.8207722520824	61.3988268048356	71.8323923368353	72.9388179818991	108.63991471776	75.2723844032643	71.505717523151	46.4231733863168	76.9313422946242	-0.726850042507948	0.0019369922640839	0.110158436928591	Nhs	X	160616292	160942726	-	8805	protein_coding	NHS actin remodeling regulator [Source:MGI Symbol;Acc:MGI:2684894]	-	37	37	43	31	89	52	58	78	67	105	66	83	0.396401563848214	0.398202154507667	0.464854181713928	0.256162889318633	0.773913133622344	0.54647111512753	0.628267768238492	0.740439178233425	0.750225798922738	1.10533856933	0.763833005858554
ENSMUSG00000034930	89.2916668468641	121.75160441506	102.130099158429	67.2471480852279	90.3347380111419	102.466470249157	128.090655920433	118.799725787843	118.661659104881	143.818553769225	130.015936696547	140.426891039441	95.5369544609798	129.968903719728	-0.451056394395302	0.00195436013178591	0.110482603509736	Rtkn	6	83112444	83129560	+	4269	protein_coding	rhotekin [Source:MGI Symbol;Acc:MGI:107371]	-	85	116	96	82	106	99	121	129	109	139	114	163	1.87826024464935	2.57491606092344	2.14053693048941	1.39756358833712	1.90112766193631	2.14586436519583	2.70336920388418	2.52573453940617	2.51736909055252	3.018033326217	2.72121303083768
ENSMUSG00000044005	0	3.14874839004465	2.12771039913393	9.02095888948179	2.55664352861722	1.03501485100159	19.0548083187421	13.8139216032376	3.26591722307011	8.27732683563886	25.0907948010881	6.89211735162901	2.98151267637986	12.7324810222343	-2.04286130837528	0.00199437723570853	0.112409274076929	Gls2	10	128030326	128045873	+	3474	protein_coding	glutaminase 2 (liver, mitochondrial) [Source:MGI Symbol;Acc:MGI:2143539]	-	0	3	2	11	3	1	18	15	3	8	22	8	0	0.0818319089399245	0.0547996555139325	0.230381048572401	0.0661185028579374	0.026635657016396	0.49418417896551	0.360898928543095	0.085140852209351	0.213449704810169	0.645322358144748
ENSMUSG00000031683	495.831373549645	477.560172490105	479.798695004701	441.206898412837	461.900264170178	467.826712652716	474.253007044248	537.822014419383	619.435633308964	568.031554095717	603.319565898891	536.723638758109	470.687352713364	556.597568920885	-0.241877753613469	0.00201573494076358	0.113275929697865	Lsm6	8	79531494	79547769	-	4076	protein_coding	LSM6 homolog, U6 small nuclear RNA and mRNA degradation associated [Source:MGI Symbol;Acc:MGI:1925901]	-	472	455	451	538	542	452	448	584	569	549	529	623	10.9237265157323	10.5781193575458	10.5322222115047	9.60355393778216	10.1811463836468	10.2611842881947	10.4831061948169	11.9757527087191	13.7633655059975	12.4845690231317	13.2252942099103
ENSMUSG00000068606	108.200490414435	158.487002298914	167.025266332013	110.711768189095	144.024252112104	70.3810098681078	259.357113227323	263.385438568396	204.66414597906	105.535917154395	196.164395717598	172.302933790725	126.471631535778	200.234990739583	-0.663319169446321	0.00206385133209138	0.11495651919749	Gm4841	18	60401377	60406344	-	2839	protein_coding	predicted gene 4841 [Source:MGI Symbol;Acc:MGI:3643814]	-	103	151	157	135	169	68	245	286	188	102	172	200	3.42243199715738	5.04014228017517	5.26395183358543	3.4598100473909	4.55777500750407	2.21634185568765	8.23089077223817	8.42024616740617	6.52888485008262	3.33019883762212	6.17371958784327
ENSMUSG00000038248	647.101962090215	705.319639370001	718.1022597077	670.831306508737	708.190257426971	860.097341182317	900.86899329164	794.760956239601	926.431852277554	792.554044512421	1075.48270442846	783.9783487478	718.27379438099	879.012816582912	-0.290521147747506	0.00207183051977859	0.115062540714273	Sobp	10	42878496	43050526	-	5529	protein_coding	sine oculis binding protein [Source:MGI Symbol;Acc:MGI:1924427]	-	616	672	675	818	831	831	851	863	851	766	943	910	10.5098645184118	11.5173860682284	11.6207679686558	10.7644189796239	11.507633037292	13.9074549514725	14.6801034736539	13.0463298186021	15.1750287459799	12.8415534969041	17.3799670290514
ENSMUSG00000063821	183.83578468472	192.073651792723	201.068632718156	153.35630112119	284.639646186051	297.049262237455	320.755940032159	345.348040080939	247.121069878972	235.903814815707	339.866220487466	369.589792981106	218.670546456716	309.764146379391	-0.503446849089732	0.00210924972006246	0.116457641978259	Dusp29	14	21726605	21764644	-	1242	protein_coding	dual specificity phosphatase 29 [Source:MGI Symbol;Acc:MGI:3647127]	-	175	183	189	187	334	287	303	375	227	228	298	429	13.2916668776302	13.9624212166628	14.4849785085632	10.9547858024065	20.5900044986877	21.3822561999303	23.2684352670886	25.2367729017454	18.0198351504535	17.0156536421498	24.4499803072049
ENSMUSG00000040287	3251.26716342405	3663.04396041861	3356.46315463377	3076.96706848506	3438.68554599017	3238.56146878396	3991.98234277647	3658.84736864419	4146.62623422468	3383.35734406738	4066.98973912183	3704.51307650059	3337.49806028927	3825.38601755586	-0.196748764768496	0.00216140779073031	0.118302718904193	Stac3	10	127337555	127344692	+	2543	protein_coding	SH3 and cysteine rich domain 3 [Source:MGI Symbol;Acc:MGI:3606571]	-	3095	3490	3155	3752	4035	3129	3771	3973	3809	3270	3566	4300	114.809358038181	130.049985618557	118.094766077623	107.349579873537	121.486703955485	113.855084771588	141.434812427698	130.585919867227	147.676423131637	119.189165240337	142.895589394181
ENSMUSG00000032086	349.813236000067	335.866494938096	355.327636655366	388.721319419488	439.742686922162	353.975079042542	518.714226454646	420.864144845305	392.99870584277	499.743607701696	566.823864370036	404.050379739251	370.57440882962	467.199154825617	-0.330826969180487	0.00218450437685396	0.119222316682594	Bace1	9	45749878	45775697	+	6348	protein_coding	beta-site APP cleaving enzyme 1 [Source:MGI Symbol;Acc:MGI:1346542]	-	333	320	334	474	516	342	490	457	361	483	497	469	4.94846281146057	4.77687967498085	5.00826379074544	5.43281983644108	6.22363843347473	4.98519804449215	7.36216096483433	6.01732446057269	5.60682286954831	7.05254065431207	7.97817055107437
ENSMUSG00000019927	2360.45147535181	2782.44399400279	2833.04639644682	2420.8973310682	2788.44587521185	2862.85107787038	3047.71073053658	3085.10915805639	3129.83733877552	3000.53097791909	3291.45608163365	2844.72143688487	2674.68935832531	3066.56095396768	-0.19717744570559	0.00225074362703775	0.122133475096966	Ube2d1	10	71090810	71121092	-	4371	protein_coding	ubiquitin-conjugating enzyme E2D 1 [Source:MGI Symbol;Acc:MGI:2384911]	-	2247	2651	2663	2952	3272	2766	2879	3350	2875	2900	2886	3302	48.4936932885596	57.4725097951267	57.9919893238543	49.1382206611764	57.3144407423143	58.5550825133238	62.8213123975404	64.0601790664483	64.8490464923317	61.4968083985509	67.2820732841908
ENSMUSG00000039782	498.98284414424	448.171854183022	387.243292642375	360.838355579272	537.747355519156	426.426118612653	748.430526741703	788.314459491424	446.342020486248	460.426305232411	833.698681799791	467.802465241819	443.234970113453	624.169076498899	-0.493462880567987	0.00226425204848582	0.122515443697784	Cpeb2	5	43390513	43447067	+	7816	protein_coding	cytoplasmic polyadenylation element binding protein 2 [Source:MGI Symbol;Acc:MGI:2442640]	-	475	427	364	440	631	412	707	856	410	445	731	543	5.73286947979084	5.1769570990134	4.43296681070664	4.0959250907908	6.18125099811785	4.87759675789193	8.62742136694253	9.15405171751499	5.17184925946209	5.27728860921802	9.53052163728505
ENSMUSG00000079317	223.754412216259	262.395699170387	215.962605512094	236.185105470069	231.802346594628	197.687836541303	281.587722932522	274.436575850986	283.046159332743	266.943790449353	309.072972322494	257.592886017134	227.964667584123	278.780017817539	-0.287549637619771	0.0023069068855551	0.124114211927962	Trappc2	X	165223570	165236136	+	3643	protein_coding	trafficking protein particle complex 2 [Source:MGI Symbol;Acc:MGI:1913476]	-	213	250	203	288	272	191	266	298	260	258	271	299	5.51548144121336	6.50297492124846	5.30413432073106	5.75197773237018	5.7166460489107	4.85140379981259	6.96415794118347	6.83724654720644	7.03656540850711	6.564413355192	7.58043215338015
ENSMUSG00000069922	2.1009803963968	0	0	0	0	2.07002970200317	9.52740415937105	6.44649674817753	0	2.06933170890971	62.7269870027203	8.61514668953626	0.695168349733329	14.8975610514525	-4.45673148180873	0.00238777992596375	0.127243809601865	Ces3a	8	105775233	105785045	+	2627	protein_coding	carboxylesterase 3A [Source:MGI Symbol;Acc:MGI:102773]	-	2	0	0	0	0	2	9	7	0	2	55	10	0.0718179357747204	0	0	0	0	0.0704471050437454	0.32675977116981	0.222721485707676	0	0.0705675936915233	2.13346961571646
ENSMUSG00000035199	1630.36078760392	1521.89505518825	1415.99127062363	1414.6503713051	1397.63179564408	1327.92405383503	1692.70213898159	1639.25203025086	1582.88121411465	1623.39072563967	1617.21577399741	1712.69116187981	1451.40888903333	1644.68884081066	-0.181103687998325	0.00238949787344355	0.127243809601865	Arl6ip5	6	97187650	97210276	+	1442	protein_coding	ADP-ribosylation factor-like 6 interacting protein 5 [Source:MGI Symbol;Acc:MGI:1929501]	-	1552	1450	1331	1725	1640	1283	1599	1780	1454	1569	1418	1988	101.528846469783	95.2870723308095	87.8598468560817	87.0377626230866	87.0783433755659	82.3293381313267	105.761925740644	103.176048192811	99.4135765410229	100.853986365033	100.206251379785
ENSMUSG00000053675	0	0	1.06385519956696	0.820087171771072	0	0	8.46880369721871	6.44649674817753	0	2.06933170890971	2.28098134555346	6.89211735162901	0.313990395223006	4.35962180858141	-3.65538781697959	0.00239550563527072	0.127243809601865	Tgm5	2	120876592	120916322	-	3155	protein_coding	transglutaminase 5 [Source:MGI Symbol;Acc:MGI:1921426]	-	0	0	1	1	0	0	8	7	0	2	2	8	0	0	0.0301702065380985	0.0230613387909674	0	0	0.241844808977099	0.185448286197802	0	0.0587578664429894	0.0645973165882396
ENSMUSG00000026586	1091.45931592814	1158.73940753643	924.490168423691	1021.00852885498	889.711947958794	806.276568930235	1325.36777861473	1324.29461769704	1102.79138232334	1120.54312037461	1232.87041727165	1070.0012188404	981.947656272045	1195.97808918696	-0.284565600573033	0.0024240265806438	0.127715996268556	Prrx1	1	163072688	163141279	-	11066	protein_coding	paired related homeobox 1 [Source:MGI Symbol;Acc:MGI:97712]	Homeobox	1039	1104	869	1245	1044	779	1252	1438	1013	1083	1081	1242	8.85702513347722	9.45387050514057	7.47492358706597	8.18582705923098	7.22339565038036	6.51388399222786	10.7909532142156	10.8615640593833	9.02537658120261	9.07137616680485	9.95448676471189
ENSMUSG00000069324	0	1.04958279668155	0	0	0	1.03501485100159	6.35160277291403	6.44649674817753	0	0	19.3883414372044	1.72302933790725	0.347432941280522	5.65157838270054	-4.01086306951214	0.00245894640190493	0.12899591955478	Gm5096	18	87774410	87776275	+	1866	protein_coding	predicted gene 5096 [Source:MGI Symbol;Acc:MGI:3643681]	-	0	1	0	0	0	1	6	7	0	0	17	2	0	0.0507831460623969	0	0	0	0.0495885704581777	0.306680213956088	0.313552702547731	0	0	0.928370063025249
ENSMUSG00000036306	18.9088235675712	19.9420731369494	10.6385519956696	16.4017434354214	20.4531482289378	13.4551930630206	37.0510161753318	23.0232026720626	28.3046159332743	27.9359780702811	51.322080274953	21.5378667238407	16.6332555712617	31.5291266416239	-0.908145191536745	0.00249593088584004	0.13057441744762	Lzts1	8	69585321	69636877	-	6802	protein_coding	leucine zipper, putative tumor suppressor 1 [Source:MGI Symbol;Acc:MGI:2684762]	-	18	19	10	20	24	13	35	25	26	27	45	25	0.249631204869408	0.264696509922996	0.139939726003677	0.213932737093508	0.270150754399852	0.176847918579017	0.49076949851691	0.307204468724569	0.376862801869912	0.367927731031024	0.674154956087571
ENSMUSG00000092085	29.4137255495552	25.1899871203572	31.9156559870089	16.4017434354214	20.4531482289378	17.5952524670269	61.3988268048356	39.5999085959477	48.9887583460516	22.7626487980069	53.6030616205064	29.2914987444233	23.4949187980512	42.6074504849619	-0.861726666853391	0.00251685181604824	0.131306169951299	Gm17224	1	172040588	172041247	+	500	lncRNA	predicted gene 17224 [Source:MGI Symbol;Acc:MGI:4938051]	-	28	24	30	20	24	17	58	43	45	22	47	34	5.28264008384533	4.54854482651676	5.71122009766205	2.91034095542008	3.67513086285559	3.14609726414863	11.0637953986798	7.18824049914995	8.87337961725856	4.07838350980789	9.57881309028711
ENSMUSG00000020884	2.1009803963968	0	0	0	0	0	4.23440184860935	3.68371242753002	0	0	25.0907948010881	4.30757334476813	0.350163399399467	6.21941373699927	-4.14952397327833	0.00258794254125595	0.13354347642045	Asgr1	11	69944911	69948720	+	1591	protein_coding	asialoglycoprotein receptor 1 [Source:MGI Symbol;Acc:MGI:88081]	-	2	0	0	0	0	0	4	4	0	0	22	5	0.118583103255934	0	0	0	0	0	0.23979270028999	0.210142531365382	0	0	1.40908225782203
ENSMUSG00000020692	139.715196360387	161.635750688959	87.236126364491	118.912639906805	146.580895640721	123.166767269189	168.317473482222	160.241490597556	189.423198938066	138.645224496951	203.007339754258	202.455947204102	129.541229371759	177.015112412193	-0.449719811538174	0.0026074359364549	0.134183754795062	Nle1	11	82791594	82799237	-	3233	protein_coding	notchless homolog 1 [Source:MGI Symbol;Acc:MGI:2429770]	-	133	154	82	145	172	119	159	174	174	134	178	235	3.88068982342489	4.51384100992101	2.41426975981177	3.26321867101695	4.07337424226184	3.40592032926699	4.69069901018083	4.49849965419148	5.30627918136918	3.84179758677739	5.61045577216045
ENSMUSG00000037499	430.700981261344	414.585204689212	432.989066223754	410.043585885536	379.235456744888	389.165583976596	435.084789944611	456.780341013722	519.280838468147	464.564968650231	486.989517275665	515.185772034269	409.453313130222	479.647704564441	-0.229619436667829	0.00263926882005996	0.135255769665456	Nenf	1	191038986	191050391	-	742	protein_coding	neuron derived neurotrophic factor [Source:MGI Symbol;Acc:MGI:1913458]	-	410	395	407	500	445	376	411	496	477	449	427	598	52.1246253941227	50.4457324369419	52.2117380895879	49.0286549093679	45.9184982583877	46.889669070869	52.8304199839369	55.8729907788249	63.3812829804183	56.0890160470395	58.6418705848568
ENSMUSG00000048349	32.5651961441504	26.2395699170387	23.4048143904732	36.0838355579272	28.1230788147895	32.0854603810491	60.3402263426833	39.5999085959477	41.3682848255547	51.7332927227429	42.1981548927391	44.7987627855886	29.7503258675714	46.6731050275427	-0.64342136939845	0.00269902467502855	0.137403573375512	Pou4f1	14	104699112	104705435	-	4672	protein_coding	POU domain, class 4, transcription factor 1 [Source:MGI Symbol;Acc:MGI:102525]	Pou	31	25	22	44	33	31	57	43	38	50	37	52	0.625924361695837	0.507070583007452	0.448226463144139	0.685225824264146	0.540807463230569	0.613976979178884	1.16363873133553	0.769289436980945	0.8019131122903	0.991979177159844	0.807017096738886
ENSMUSG00000027200	266.824510342394	263.445281967069	223.409591909062	291.13094597873	334.920302248856	216.318103859331	355.689755283186	454.017556693075	279.780242109673	299.018431937454	372.940449997991	342.02132357459	266.008122717574	350.577959932661	-0.396612819482826	0.00270704326725241	0.13744232009444	Sema6d	2	123931889	124509690	+	10559	protein_coding	sema domain, transmembrane domain (TM), and cytoplasmic domain, (semaphorin) 6D [Source:MGI Symbol;Acc:MGI:2387661]	-	254	251	210	355	393	209	336	493	257	289	327	397	2.26920599437297	2.25259011162616	1.89310259890304	2.4461858110951	2.84971436117342	1.83154133414779	3.03502752510232	3.90254821312021	2.39969963657696	2.53694141648762	3.15579517777905
ENSMUSG00000060613	0	2.0991655933631	0	0	0	0	3.17580138645702	9.20928106882504	0	0	21.6693227827579	2.58454400686088	0.349860932227183	6.10649154081681	-4.12541684525766	0.00273961613292826	0.138070472670547	Cyp2c70	19	40141797	40175777	-	1981	protein_coding	cytochrome P450, family 2, subfamily c, polypeptide 70 [Source:MGI Symbol;Acc:MGI:2385878]	-	0	2	0	0	0	0	3	10	0	0	19	3	0	0.0956702176198209	0	0	0	0	0.144438485422024	0.421929287484002	0	0	0.977356421726911
ENSMUSG00000038641	0	0	0	0.820087171771072	0	0	5.29300231076169	5.52556864129503	0	1.03466585445486	11.4049067277673	0.861514668953626	0.136681195295179	4.01994303387209	-3.99992322997365	0.0027437225082673	0.138070472670547	Akr1d1	6	37507108	37545750	+	2893	protein_coding	aldo-keto reductase family 1, member D1 [Source:MGI Symbol;Acc:MGI:2384785]	-	0	0	0	1	0	0	5	6	0	1	10	1	0	0	0	0.0251498527084348	0	0	0.164841940097379	0.173351244764426	0	0.0320395901534102	0.352237355402516
ENSMUSG00000001249	108.200490414435	125.949935601786	141.492741542406	104.151070814926	101.41352663515	106.606529653163	176.786277179441	161.162418704438	138.257162443301	124.159902534583	191.602433026491	132.673259018858	114.635715776978	154.106908817852	-0.427915162673107	0.0027475349020667	0.138070472670547	Hpn	7	30798150	30814715	-	4101	protein_coding	hepsin [Source:MGI Symbol;Acc:MGI:1196620]	-	103	120	133	127	119	103	167	175	127	120	168	154	2.3692476078834	2.77282664381661	3.08702053559722	2.25319008375	2.2217171252937	2.324024400127	3.88394300712932	3.56674800630374	3.05323691075845	2.71223216719285	4.17448935435632
ENSMUSG00000030378	0	0	0	0	0	0	2.11720092430468	0.920928106882504	0	0	20.5288321099812	3.44605867581451	0	4.50216996949714	-4.64369700100034	0.00280291679177993	0.140057092883188	Sult2a8	7	14144611	14180694	-	3284	protein_coding	sulfotransferase family 2A, dehydroepiandrosterone (DHEA)-preferring, member 8 [Source:MGI Symbol;Acc:MGI:1924221]	-	0	0	0	0	0	0	2	1	0	0	18	4	0	0	0	0	0	0	0.0580862037395514	0.0254519463613218	0	0	0.558538612826755
ENSMUSG00000052214	1018.97549225245	1162.93773872316	1081.9407379596	1230.13075765661	1188.83924080701	1252.36796971192	1323.25057769042	1426.517637561	1246.49174013842	1264.36167414384	1474.65443990031	1287.96443008567	1155.86532285179	1337.20674991994	-0.209442816933336	0.0028470563024963	0.141701869145774	Opa3	7	18962259	18990468	+	5082	protein_coding	optic atrophy 3 [Source:MGI Symbol;Acc:MGI:2686271]	-	970	1108	1017	1500	1395	1210	1250	1549	1145	1222	1293	1495	18.0052878553507	20.6602865824666	19.048638460325	21.4753612412934	21.0170190282843	22.0314934464189	23.4596484013045	25.4765669375344	22.2135197467337	22.2880426862422	25.9267278876243
ENSMUSG00000027968	118.705392396419	114.404524838289	96.8108231605937	125.473337280974	95.4480250683764	108.676559355166	159.848669785003	160.241490597556	125.193493551021	134.506561079131	142.561334097092	134.396288356766	109.919777016636	142.791306244428	-0.377251684893821	0.0028657627987555	0.141701869145774	Larp7	3	127330363	127346998	-	2366	protein_coding	La ribonucleoprotein domain family, member 7 [Source:MGI Symbol;Acc:MGI:107634]	-	113	109	91	153	112	105	151	174	115	130	125	156	4.50533094942128	4.36559053686186	3.66103852414234	4.70501020899485	3.62438941110019	4.10646179622602	6.08707080625184	6.14693549535125	4.79214171120848	5.09288650075911	5.38367851426183
ENSMUSG00000034456	0	3.14874839004465	0	0	0	1.03501485100159	13.7618060079804	11.0511372825901	0	0	14.8263787460975	6.89211735162901	0.697293873507705	7.7552398980495	-3.53204187319756	0.00295663811348454	0.145405070440222	Uroc1	6	90310266	90341533	+	3472	protein_coding	urocanase domain containing 1 [Source:MGI Symbol;Acc:MGI:2385332]	-	0	3	0	0	0	1	13	12	0	0	13	8	0	0.0818790471363185	0	0	0	0.0266510001367971	0.357116389695987	0.288885455704772	0	0	0.381546506317201
ENSMUSG00000038704	0	0	0	0	0	0	5.29300231076169	1.84185621376501	0	0	9.12392538221386	6.03060268267538	0	3.71489776490266	-4.37389650287253	0.00298647094851826	0.145405070440222	Aspdh	7	44114815	44117182	+	1470	protein_coding	aspartate dehydrogenase domain containing [Source:MGI Symbol;Acc:MGI:1915602]	-	0	0	0	0	0	0	5	2	0	0	8	7	0	0	0	0	0	0	0.32441342360661	0.113719988912355	0	0	0.554570160097676
ENSMUSG00000079015	0	1.04958279668155	0	0.820087171771072	0	2.07002970200317	20.1134087808944	6.44649674817753	0	0	45.6196269110693	11.1996906963971	0.656616611742632	13.8965371894231	-4.41080298913885	0.00300693610201283	0.145405070440222	Serpina1c	12	103861185	103871146	-	1361	protein_coding	serine (or cysteine) peptidase inhibitor, clade A, member 1C [Source:MGI Symbol;Acc:MGI:891969]	-	0	1	0	1	0	2	19	7	0	0	40	13	0	0.0696262678563061	0	0.0534596060878046	0	0.135976888280617	1.3315013844721	0.429896651692921	0	0	2.99492334806607
ENSMUSG00000041548	4465.6338325414	4596.1230666685	4306.48584784707	3578.04033043719	4922.39100709769	3771.59411704978	5847.70895292952	5886.57245919297	5556.41383551661	3966.90888597992	5979.59259736841	4588.42712684701	4273.37803360694	5304.27064297241	-0.311726394705423	0.00300789595784371	0.145405070440222	Hspb8	5	116546550	116560923	-	1950	protein_coding	heat shock protein 8 [Source:MGI Symbol;Acc:MGI:2135756]	-	4251	4379	4048	4363	5776	3644	5524	6392	5104	3834	5243	5326	205.645631835408	212.799976445693	197.598452609709	162.792533185869	226.790126750576	172.916718409617	270.187470301978	273.984694517391	258.061137130984	182.243850543164	273.986454077334
ENSMUSG00000014846	411.792157693773	373.651475618632	446.819183818125	353.457571033332	340.033589306091	399.515732486612	562.116845402892	400.603726493889	371.225924355636	559.754227260078	637.534286082193	479.86367060717	387.544951659427	501.849780033643	-0.373124816646177	0.00301075461075662	0.145405070440222	Tppp3	8	106194125	106198158	-	1848	protein_coding	tubulin polymerization-promoting protein family member 3 [Source:MGI Symbol;Acc:MGI:1915221]	-	392	356	420	431	399	386	531	435	341	541	559	557	20.010000317596	18.2548922059881	21.6334094608411	16.9691146074953	16.5311284077311	19.3276283416312	27.4055612624039	19.6748503544387	18.1927756703053	27.1350536059385	30.8243329042927
ENSMUSG00000070594	0	0	0	0	0	0	3.17580138645702	0	1.0886390743567	0	19.3883414372044	2.58454400686088	0	4.37288765081317	-4.60004815638483	0.0030132074563981	0.145405070440222	Cfhr4	1	139625361	139708981	-	3187	protein_coding	complement factor H-related 4 [Source:MGI Symbol;Acc:MGI:3646434]	-	0	0	0	0	0	0	3	0	1	0	17	3	0	0	0	0	0	0	0.0897811859494918	0	0.0309360234886817	0	0.543564021840325
ENSMUSG00000116851	9.45441178378561	8.39666237345239	15.9578279935045	19.6820921225057	15.3398611717033	4.14005940400634	31.7580138645702	22.1022745651801	26.1273377845609	18.6239853801874	38.7766828744089	18.0918080480262	12.161819141493	25.9133504194889	-1.06667264576691	0.0030314817789956	0.145405070440222	Gm35576	17	15482976	15505620	-	7529	lncRNA	predicted gene, 35576 [Source:MGI Symbol;Acc:MGI:5594735]	-	9	8	15	24	18	4	30	24	24	18	34	21	0.112763411842324	0.100689441415787	0.189640725782376	0.231930478583085	0.183048754624897	0.0491604582148809	0.380040695472215	0.266439182416515	0.314282715447242	0.221600427367338	0.460177590013313
ENSMUSG00000035041	0	2.0991655933631	0	0	0	0	4.23440184860935	1.84185621376501	0	3.10399756336457	30.7932481649718	0	0.349860932227183	6.66225063178512	-4.24609533370959	0.00303279136254555	0.145405070440222	Creb3l3	10	80920158	80934708	-	3016	protein_coding	cAMP responsive element binding protein 3-like 3 [Source:MGI Symbol;Acc:MGI:2384786]	TF_bZIP	0	2	0	0	0	0	4	2	0	3	27	0	0	0.0628390918782709	0	0	0	0	0.126495419814779	0.0554271829247883	0	0.0921988073413287	0.912255042037332
ENSMUSG00000022821	0	1.04958279668155	3.19156559870089	0	0.852214509539075	0	13.7618060079804	3.68371242753002	2.17727814871341	0	20.5288321099812	4.30757334476813	0.848893817486919	7.40986700649552	-3.15650843774986	0.00305081151232087	0.145899667728113	Hgd	16	37400515	37452382	+	2615	protein_coding	homogentisate 1, 2-dioxygenase [Source:MGI Symbol;Acc:MGI:96078]	-	0	1	3	0	1	0	13	4	2	0	18	5	0	0.0362376101538939	0.109201149094877	0	0.0292792452426354	0	0.474152239015092	0.127853448337408	0.0754058178649549	0	0.701430517982051
ENSMUSG00000029273	0	0	1.06385519956696	0	0	0	8.46880369721871	3.68371242753002	0	0	6.84294403666039	5.16908801372176	0.177309199927827	4.02742469585515	-4.01097522128439	0.00307608511128866	0.146737782966208	Sult1d1	5	87702504	87716886	-	2459	protein_coding	sulfotransferase family 1D, member 1 [Source:MGI Symbol;Acc:MGI:1926341]	-	0	0	1	0	0	0	8	4	0	0	6	6	0	0	0.0387096387261898	0	0	0	0.310297020058051	0.135964525173779	0	0	0.248643188901052
ENSMUSG00000039477	730.090687747889	637.0967575857	690.442024518959	670.011219336966	790.855064852261	657.234430386007	1189.86691945923	956.844303050922	814.302027618814	651.83948830656	993.367375988534	745.210188644887	695.955030737964	891.905050511491	-0.357149108836365	0.00313173967496831	0.148157451585347	Tnrc18	5	142710416	142803417	-	12266	protein_coding	trinucleotide repeat containing 18 [Source:MGI Symbol;Acc:MGI:3648294]	-	695	607	649	817	928	635	1124	1039	748	630	871	865	5.34496467918361	4.68939668884123	5.03639035189775	4.84621832826147	5.79264063388293	4.79031412209354	8.73996105587364	7.0800566878162	6.01236294881008	4.76072367664307	7.23600802914827
ENSMUSG00000059481	0	1.04958279668155	6.38313119740178	0.820087171771072	0	3.10504455300476	23.2892101673514	16.5767059238851	2.17727814871341	0	100.363179204352	13.784234703258	1.89297428647653	26.0317680245934	-3.79740959712853	0.00314791155929487	0.148296390820712	Plg	17	12597495	12638272	+	3711	protein_coding	plasminogen [Source:MGI Symbol;Acc:MGI:97620]	-	0	1	6	1	0	3	22	18	2	0	88	16	0	0.0255352601865892	0.15389976010946	0.0196061772798442	0	0.0748037772635081	0.5654287318479	0.405420494020602	0.0531356005704276	0	2.41643748013458
ENSMUSG00000021364	0	1.04958279668155	0	0	0	0	7.41020323506637	5.52556864129503	0	0	34.214720183302	6.89211735162901	0.174930466113592	9.00710156854873	-5.16988342325858	0.00322705687794052	0.150898773220833	Elovl2	13	41335857	41373881	-	3966	protein_coding	elongation of very long chain fatty acids (FEN1/Elo2, SUR4/Elo3, yeast)-like 2 [Source:MGI Symbol;Acc:MGI:1858960]	-	0	1	0	0	0	0	7	6	0	0	30	8	0	0.0238934318084802	0	0	0	0	0.168341610131721	0.126451122315553	0	0	0.770818963070711
ENSMUSG00000027173	30.4642157477536	19.9420731369494	17.0216831930714	22.1423536378189	20.4531482289378	19.6652821690301	31.7580138645702	33.1534118477702	21.7727814871341	45.5252975960137	42.1981548927391	46.5217921234958	21.6147926855936	36.8215753019538	-0.772222847502218	0.00323730484086793	0.151005120877726	Depdc7	2	104552129	104573223	-	2096	protein_coding	DEP domain containing 7 [Source:MGI Symbol;Acc:MGI:2139258]	-	29	19	16	27	24	19	30	36	20	44	37	54	1.30517791057384	0.859000792221478	0.726618333035884	0.937251977532707	0.876701064612498	0.838794454687134	1.36513663941331	1.43560634857868	0.940773920404852	1.94579365925949	1.79884726906683
ENSMUSG00000011263	11.5553921801824	29.3883183070834	20.2132487917723	21.3222664660479	28.9752933243285	22.7703267220349	71.984831426359	40.5208367028302	43.5455629742681	30.0053097791909	37.6361922016322	24.1224107307015	22.3708076319082	41.3025239691636	-0.876442978460352	0.00337764510690977	0.156093725317429	Exoc3l2	7	19197256	19230687	+	4016	protein_coding	exocyst complex component 3-like 2 [Source:MGI Symbol;Acc:MGI:1921713]	-	11	28	19	26	34	22	68	44	40	29	33	28	0.258381833924564	0.660686707038872	0.450336910091214	0.471046220374266	0.648211577321392	0.506899899016213	1.61495845735641	0.915763058123893	0.982003056358849	0.669329057544984	0.837344324773975
ENSMUSG00000045377	79.8372550630785	54.5783054274406	82.9807055662232	77.9082813182518	75.8470913489776	57.9608316560888	116.446050836757	76.4370328712479	112.12982465874	96.2239244643017	107.206123241013	91.3205549090844	71.5187450633434	99.9605851635241	-0.476638354373214	0.00339585039765449	0.156093725317429	Tmem88	11	69287345	69289060	-	1582	protein_coding	transmembrane protein 88 [Source:MGI Symbol;Acc:MGI:1914270]	-	76	52	78	95	89	56	110	83	103	93	94	106	4.53179346185034	3.11478522675505	4.69316442917867	4.36919075165783	4.30739895167177	3.27547867167999	6.63181423479	4.38526417420873	6.41914665386734	5.44893785789183	6.05487553115493
ENSMUSG00000048458	76.6857844684833	71.3716301743453	93.6192575618928	72.9877582876254	109.083457221002	58.9958465070904	129.149256382585	116.036941467196	109.952546510027	95.1892586098469	118.61102996878	102.520245605482	80.4572890367398	111.909879757319	-0.471529102100897	0.00341045144532683	0.156385301384018	Inka2	3	105611915	105628158	+	4781	protein_coding	inka box actin regulator 2 [Source:MGI Symbol;Acc:MGI:1923497]	-	73	68	88	89	128	57	122	126	101	92	104	119	1.44034693175632	1.34778745818143	1.75203014918169	1.35442556490476	2.0498533711807	1.10318751957178	2.43381315162558	2.2028044704399	2.08280773744013	1.78362877156893	2.2166567160566
ENSMUSG00000117545	201.694118054093	305.428593834331	186.174659924219	176.31874193078	228.393488556472	223.563207816342	274.177519697456	314.036484446934	267.805212291749	285.567775829541	361.535543270224	241.224107307015	220.262135019373	290.72444047382	-0.400623457871667	0.00346302789011527	0.157645427335896	Gm30794	17	87762280	87767792	-	2080	lncRNA	predicted gene, 30794 [Source:MGI Symbol;Acc:MGI:5589953]	-	192	291	175	215	268	216	259	341	246	276	317	280	8.70764848985494	13.2574774090182	8.00852177156136	7.52071280547256	9.86513492833832	9.60912060316888	11.8763387278601	13.7029852985808	11.6605309072949	12.2993208993332	15.5302974100911
ENSMUSG00000025194	0	0	1.06385519956696	0	0.852214509539075	0	9.52740415937105	2.76278432064751	0	0	51.322080274953	5.16908801372176	0.319344951517673	11.4635594614489	-5.03627680880387	0.00352655581145655	0.159014080850867	Abcc2	19	43770631	43829179	+	8532	protein_coding	ATP-binding cassette, sub-family C (CFTR/MRP), member 2 [Source:MGI Symbol;Acc:MGI:1352447]	-	0	0	1	0	1	0	9	3	0	0	45	6	0	0	0.0111564699516761	0	0.00897388962839797	0	0.100609226308379	0.0293896595817795	0	0	0.537459213702257
ENSMUSG00000021775	2315.28039682928	2576.7257658532	2098.98630874562	2481.58378177926	2427.10692316728	2253.22733063045	2618.97754336489	2716.73791530339	2673.69756662006	2498.71803850848	2643.65737949647	2786.13843939603	2358.81841783418	2656.32114711488	-0.171196318043868	0.00361113986637164	0.162056319406033	Nr1d2	14	4230569	4265642	+	5409	protein_coding	nuclear receptor subfamily 1, group D, member 2 [Source:MGI Symbol;Acc:MGI:2449205]	THR-like	2204	2455	1973	3026	2848	2177	2474	2950	2456	2415	2318	3234	38.4377186989776	43.0096349798894	34.7206423019881	40.7038811753613	40.3138777092682	37.2421440521329	43.6243390905546	45.5857581732692	44.7669939811981	41.3842929132677	43.6697087660942
ENSMUSG00000041272	3.1514705945952	1.04958279668155	1.06385519956696	2.46026151531322	2.55664352861722	2.07002970200317	5.29300231076169	6.44649674817753	9.79775166921033	7.242660981184	6.84294403666039	7.75363202058264	2.05864055612955	7.22941462776276	-1.79515713365604	0.00368088237075756	0.16347075104198	Tox	4	6686353	6991557	-	7609	protein_coding	thymocyte selection-associated high mobility group box [Source:MGI Symbol;Acc:MGI:2181659]	HMG	3	1	1	3	3	2	5	7	9	7	6	9	0.0371926108450895	0.0124538507757173	0.0125097912508478	0.0286864991006053	0.0301873674501872	0.0243217958930108	0.0626741664741382	0.0768943807273053	0.116616896008129	0.0852718806934828	0.0803540020380717
ENSMUSG00000045776	1223.82108090114	1170.28481829993	1320.2443026626	1203.06788098816	1292.80941097078	1133.34126184674	1459.81003730807	1595.0474811205	1597.03352208128	1098.81513743106	1553.34829632191	1443.03707049732	1223.92812594489	1457.84859079336	-0.252185035432542	0.00368184686494264	0.16347075104198	Lrtm1	14	28740165	28755602	+	7939	protein_coding	leucine-rich repeats and transmembrane domains 1 [Source:MGI Symbol;Acc:MGI:2442106]	-	1165	1115	1241	1467	1517	1095	1379	1732	1467	1062	1362	1675	13.8427736888413	13.3088431623583	14.8793385842016	13.4446094646721	14.6302365929586	12.7626701549415	16.567028174724	18.2350195597942	18.2184264720134	12.3992124248989	17.4821624313194
ENSMUSG00000028011	1.0504901981984	9.44624517013394	0	2.46026151531322	0	4.14005940400634	21.1720092430468	11.9720653894726	9.79775166921033	1.03466585445486	67.2889496938272	18.9533227169798	2.84950938127532	21.7031274278319	-2.93797821757785	0.00368581744085571	0.16347075104198	Tdo2	3	81864397	81883509	-	3881	protein_coding	tryptophan 2,3-dioxygenase [Source:MGI Symbol;Acc:MGI:1928486]	-	1	9	0	3	0	4	20	13	9	1	59	22	0.0243063279155102	0.219750619678406	0	0.056242095247747	0	0.0953695155629576	0.491510159960544	0.279977968064301	0.228636424046858	0.0238831575145106	1.54914551614505
ENSMUSG00000031173	0	0	0	0.820087171771072	0	0	3.17580138645702	6.44649674817753	0	0	12.5453974005441	2.58454400686088	0.136681195295179	4.12537325700658	-4.04110336797732	0.00371907805961223	0.164335787466319	Otc	X	10118544	10187263	+	4241	protein_coding	ornithine transcarbamylase [Source:MGI Symbol;Acc:MGI:97448]	-	0	0	0	1	0	0	3	7	0	0	11	3	0	0	0	0.0171559829958741	0	0	0.0674682008066566	0.137960231774125	0	0	0.264306752204062
ENSMUSG00000029102	1.0504901981984	1.04958279668155	0	0.820087171771072	0.852214509539075	0	2.11720092430468	0.920928106882504	0	1.03466585445486	27.3717761466416	10.3381760274435	0.628729112698349	6.96379117662119	-3.44299033273195	0.00372267677806794	0.164335787466319	Hgfac	5	35198853	35205805	+	3410	protein_coding	hepatocyte growth factor activator [Source:MGI Symbol;Acc:MGI:1859281]	-	1	1	0	1	1	0	2	1	0	1	24	12	0.0276635949091188	0.0277892523614172	0	0.0213368105236076	0.0224531455453054	0	0.0559399099943363	0.024511493211314	0	0.0271819748720867	0.717200705580865
ENSMUSG00000028086	366.621079171242	342.163991718185	345.752939859263	326.394694364887	357.077879496872	324.994663214498	437.201990868916	415.338576204009	437.632907891395	387.999695420571	490.410989293995	331.683147547146	343.834207970824	416.711217871005	-0.274957449731967	0.00383055450564136	0.16760143499741	Fbxw7	3	84722575	84886505	+	7046	protein_coding	F-box and WD-40 domain protein 7 [Source:MGI Symbol;Acc:MGI:1354695]	-	349	326	325	398	419	314	413	451	402	375	430	385	4.67246205867063	4.38435996027434	4.39054435552125	4.10983430406327	4.55305560937793	4.12363519119178	5.59053742849303	5.35005258651887	5.62509636064267	4.93314651826297	6.21884399300562
ENSMUSG00000120512	174.381372900935	196.27198297945	181.919239125951	157.456736980046	145.728681131182	200.792881094308	207.485690581858	196.157686765973	290.66663285324	219.34916114443	298.808556267504	186.948683162937	176.091815701978	233.236068462657	-0.404719642645305	0.00391495330699255	0.170049049834461	ENSMUSG00000120512	12	73086116	73087384	+	1269	lncRNA	novel transcript	-	166	187	171	192	171	194	196	213	267	212	262	217	12.3398380884601	13.9640445652521	12.8266172406122	11.0083818644731	10.3172999991513	14.1459896455021	14.7312837840089	14.0294979229107	20.7441761475181	15.4849434787462	21.0389235086701
ENSMUSG00000040690	78.7867648648801	60.8758022075299	80.8529951670892	40.1842714167825	71.5860188012823	55.8908019540856	88.9224388207964	89.3300263676029	192.689116161136	90.0159293375726	65.0079683482737	100.797216267574	64.6961090686083	104.460449217159	-0.693635343693931	0.00395628769333099	0.170437958866812	Col16a1	4	129941633	129993076	+	6750	protein_coding	collagen, type XVI, alpha 1 [Source:MGI Symbol;Acc:MGI:1095396]	-	75	58	76	49	84	54	84	97	177	87	57	117	1.04814287377884	0.814245678820902	1.07173512943782	0.528172988205866	0.952811705184782	0.740258179799676	1.18692057916872	1.20113579400094	2.58533035762101	1.19467799782251	0.86050803175156
ENSMUSG00000026360	66.1808824864992	29.3883183070834	48.9373391800803	33.6235740426139	24.7142207766332	27.9454009770428	74.1020323506637	90.2509544744854	52.2546755691217	37.2479707603749	61.5864963299435	76.6748055368728	38.4649559616588	65.352822503577	-0.774248061929445	0.00397934702448256	0.170583338928733	Rgs2	1	143875076	143879899	-	3627	protein_coding	regulator of G-protein signaling 2 [Source:MGI Symbol;Acc:MGI:1098271]	-	63	28	46	41	29	27	70	98	48	36	54	89	1.6385360061555	0.731546130539871	1.20722417283547	0.822470217619405	0.612184053756618	0.688825849689525	1.84075772203585	2.25840937451252	1.30478884179889	0.920005303362936	1.51715533872875
ENSMUSG00000004473	28.3632353513568	17.8429075435863	25.5325247896071	12.3013075765661	17.8965047003206	18.6302673180285	44.4612194103982	56.1766145198328	65.3183444614022	20.6933170890971	18.2478507644277	30.1530134133769	20.0944578799109	39.1750599430892	-0.972279610575248	0.00399030621741624	0.170583338928733	Clec11a	7	43952111	43956326	-	2978	protein_coding	C-type lectin domain family 11, member a [Source:MGI Symbol;Acc:MGI:1298219]	-	27	17	24	15	21	18	42	61	60	20	16	35	0.855267690826921	0.540947938009185	0.767121571210483	0.366480140457532	0.539915967931269	0.559295132488003	1.34515008552533	1.712100638981	1.98642928526048	0.62250190942791	0.547493710774737
ENSMUSG00000002409	1020.02598245065	1015.99614718774	991.51304599641	1144.02160462065	1051.63270477122	1016.38458368356	1185.63251761062	1069.19753209059	1146.33694529761	1512.681479213	1508.86916008362	1110.49240828122	1039.9290114517	1255.53500709611	-0.270564503193029	0.00403368379184107	0.171624593408424	Dyrk1b	7	27878894	27886719	+	2695	protein_coding	dual-specificity tyrosine-(Y)-phosphorylation regulated kinase 1b [Source:MGI Symbol;Acc:MGI:1330302]	-	971	968	932	1395	1234	982	1120	1161	1053	1462	1323	1289	33.9878314432402	34.0367299943431	32.9181022326594	37.6616477997311	35.0580665179638	33.7167686717664	39.637421938844	36.0078837619756	38.5226499153711	50.2833251082741	50.0247492142654
ENSMUSG00000039621	162.825980720752	180.528241029226	180.855383926384	160.73708566713	121.866674864088	135.586945481208	187.372281800964	244.966876430746	210.107341350844	222.453158707794	174.49507293484	180.056565811308	157.066718614798	203.241882839416	-0.37535039819615	0.00405091315099617	0.171624593408424	Prex1	2	166408262	166555752	-	10266	protein_coding	phosphatidylinositol-3,4,5-trisphosphate-dependent Rac exchange factor 1 [Source:MGI Symbol;Acc:MGI:3040696]	-	155	172	170	196	143	131	177	266	193	215	153	209	1.42427363035406	1.58766338350072	1.57625075752086	1.38911656746137	1.06651347771842	1.18076443543929	1.64444045759213	2.16573105710642	1.8535427258598	1.94121029392854	1.51870707563277
ENSMUSG00000091223	2.1009803963968	3.14874839004465	0	4.10043585885536	4.26107254769537	3.10504455300476	11.6446050836757	13.8139216032376	6.53183444614022	10.3466585445486	6.84294403666039	5.16908801372176	2.78604695766616	9.05817528799737	-1.66954298047247	0.00414048041489483	0.173863454761149	Gm8775	3	4276778	4278104	+	1327	processed_pseudogene	predicted gene 8775 [Source:MGI Symbol;Acc:MGI:3646219]	-	2	3	0	5	5	3	11	15	6	10	6	6	0.142174617392758	0.214230634255688	0	0.274146661211387	0.288489925808182	0.209191271608801	0.790620204931257	0.944810005846806	0.445786466579179	0.69849686747412	0.460748757729983
ENSMUSG00000026715	0	0	1.06385519956696	7.38078454593965	0.852214509539075	0	38.1096166374842	28.5487713133576	0	1.03466585445486	104.925141895459	11.1996906963971	1.54947570917428	30.6363143995255	-4.27120492636208	0.00422669624194081	0.176310954691355	Serpinc1	1	160806155	160833433	+	8546	protein_coding	serine (or cysteine) peptidase inhibitor, clade C (antithrombin), member 1 [Source:MGI Symbol;Acc:MGI:88095]	-	0	0	1	9	1	0	36	31	0	1	92	13	0	0	0.0111381934972737	0.0766237672559698	0.00895918866247267	0	0.40177763578895	0.303195640927686	0	0.0108460723512539	1.09700544774763
ENSMUSG00000002608	746.898530919063	842.814985735284	821.296214065696	745.459239139904	777.219632699636	771.086063996181	899.810392829488	917.244394454974	879.620372080216	876.361978723264	914.673519566939	819.300450174899	784.129111092627	884.501851304963	-0.173938737615202	0.00424100347906777	0.176518953596891	Ccdc97	7	25410531	25418513	-	3939	protein_coding	coiled-coil domain containing 97 [Source:MGI Symbol;Acc:MGI:1196455]	-	711	803	772	909	912	745	850	996	808	847	802	951	17.0273324430332	19.3179397038851	18.6555890471148	16.790428588962	17.7272115750841	17.5010264010777	20.5815980094674	21.1347689980143	20.2242270478828	19.9311709986804	20.7478085981707
ENSMUSG00000069805	3.1514705945952	5.24791398340775	3.19156559870089	1.64017434354214	2.55664352861722	2.07002970200317	24.3478106295038	3.68371242753002	0	3.10399756336457	61.5864963299435	2.58454400686088	2.9762996251444	15.8844268262005	-2.41737297328161	0.00430969648659584	0.178984719436737	Fbp1	13	63012567	63036096	-	1702	protein_coding	fructose bisphosphatase 1 [Source:MGI Symbol;Acc:MGI:95492]	-	3	5	3	2	3	2	23	4	0	3	54	3	0.166274133913211	0.278382345923715	0.167779673844361	0.0854976778913067	0.134956333095461	0.108733575176216	1.2888857640587	0.19643758366764	0	0.163379320177114	3.23309189986439
ENSMUSG00000032079	0	0	2.12771039913393	0	0	0	8.46880369721871	0.920928106882504	0	1.03466585445486	51.322080274953	5.16908801372176	0.354618399855655	11.1525943245385	-4.99648184203902	0.00443375470822762	0.183243124921916	Apoa5	9	46179931	46183217	+	2522	protein_coding	apolipoprotein A-V [Source:MGI Symbol;Acc:MGI:1913363]	-	0	0	2	0	0	0	8	1	0	1	45	6	0	0	0.0754853303946874	0	0	0	0.302545746361121	0.0331420269034817	0	0.0367527891807358	1.81824028997132
ENSMUSG00000004939	643.95049149562	455.518933759792	461.713156612062	691.333485803013	602.515658244126	424.35608891065	827.825561403129	782.788890850129	513.837643096364	933.268600718281	1234.01090794442	684.904161818133	546.564635804211	829.439294305077	-0.600893818347509	0.00444126065789204	0.183243124921916	Nmrk2	10	81034004	81037885	-	1854	protein_coding	nicotinamide riboside kinase 2 [Source:MGI Symbol;Acc:MGI:1916814]	-	613	434	434	843	707	410	782	850	472	902	1082	795	31.1898826032246	22.1825383709578	22.2821783745535	33.082759242437	29.197203344558	20.4629081524991	40.2293642904793	38.3206920566309	25.1002947341846	45.0953947956105	59.4704707687269
ENSMUSG00000048578	2922.46373138795	3412.19367201172	2869.2174732321	3204.08058010958	3794.9112109775	3149.55019159782	4033.26776080041	4414.00841628784	3857.0482404458	3207.46414881006	4230.0799053289	3371.96841428449	3225.40280988611	3852.30614765958	-0.255933193143043	0.00446019715438408	0.183624377629838	Mlec	5	115281040	115296238	-	6007	protein_coding	malectin [Source:MGI Symbol;Acc:MGI:1924015]	-	2782	3251	2697	3907	4453	3043	3810	4793	3543	3100	3709	3914	43.6880327512477	51.2850259107638	42.7366977509421	47.3227156352016	56.7579411946338	46.8745971601968	60.4941655266703	66.6920312202154	58.1513863158668	47.8343027089777	62.9191789576609
ENSMUSG00000031594	2.1009803963968	0	0	0	0	0	6.35160277291403	1.84185621376501	1.0886390743567	0	12.5453974005441	5.16908801372176	0.350163399399467	4.49943057921693	-3.68326227469394	0.00450881356710494	0.18442313463031	Fgl1	8	41644471	41668193	-	4434	protein_coding	fibrinogen-like protein 1 [Source:MGI Symbol;Acc:MGI:102795]	-	2	0	0	0	0	0	6	2	1	0	11	6	0.0425497783672058	0	0	0	0	0	0.129062985846202	0.0377014848220933	0.0222357029450673	0	0.252802195782009
ENSMUSG00000029260	0	2.0991655933631	0	0	0	0	6.35160277291403	0.920928106882504	0	0	19.3883414372044	6.89211735162901	0.349860932227183	5.59216494477167	-3.99798756990839	0.00454035891673807	0.185293362943284	Ugt2b34	5	87037626	87054796	-	4312	protein_coding	UDP glucuronosyltransferase 2 family, polypeptide B34 [Source:MGI Symbol;Acc:MGI:2140962]	-	0	2	0	0	0	0	6	1	0	0	17	8	0	0.0439523889389761	0	0	0	0	0.132714582384522	0.0193840890191514	0	0	0.401748269388941
ENSMUSG00000044006	95.5946080360545	213.065307726354	221.281881509928	94.3100247536732	99.7090976160717	71.4160247191094	534.593233386931	496.38024960967	787.086050759896	187.274519656329	91.2392538221386	161.103243094328	132.562824060199	376.279425054882	-1.50563051910921	0.00455178762629315	0.185293362943284	Cilp2	8	70333019	70340337	-	4314	protein_coding	cartilage intermediate layer protein 2 [Source:MGI Symbol;Acc:MGI:1915959]	-	91	203	208	115	117	69	505	539	723	181	80	187	1.98986790362741	4.45909924945383	4.58945209516963	1.93955267659544	2.07652560922821	1.48000157644233	11.1649654619549	10.443180205717	16.5236013580537	3.88896307621712	1.88970360533979
ENSMUSG00000020290	650.25343268481	621.353015635477	538.310730980884	561.759712663184	603.367872753665	495.772113629759	690.207501323325	765.291256819361	744.629126859985	585.620873621449	701.40176375769	640.105399032544	578.46947972463	687.875986902392	-0.249699033562121	0.00458281250206223	0.185844332257076	Xpo1	11	23206041	23248249	+	7181	protein_coding	exportin 1 [Source:MGI Symbol;Acc:MGI:2144013]	-	619	592	506	685	708	479	652	831	684	566	615	743	8.13146351458278	7.81210409790281	6.70723058398783	6.94048027594609	7.54883445580281	6.17225435392085	8.65981901466425	9.67253355073564	9.39112729301839	7.30578504687644	8.72718202959727
ENSMUSG00000033420	127.109313982006	110.206193651563	118.087927151933	91.84976323836	115.048958787775	108.676559355166	241.360905370733	316.799268767582	170.916334674002	153.130546459319	99.2226885315757	92.182069578038	111.829786027801	178.935302230208	-0.679803409319909	0.00460311577798222	0.186268817528691	Antxr1	6	87110835	87312803	-	9537	protein_coding	anthrax toxin receptor 1 [Source:MGI Symbol;Acc:MGI:1916788]	-	121	105	111	112	135	105	228	344	157	148	87	107	1.1968413437613	1.04329892083521	1.10787010387698	0.854456818200296	1.08381100469554	1.01875732514111	2.28018041430201	3.01488539337316	1.62305942925168	1.43841869334641	0.929589726524218
ENSMUSG00000074882	0	0	0	0.820087171771072	0	0	3.17580138645702	1.84185621376501	1.0886390743567	0	11.4049067277673	3.44605867581451	0.136681195295179	3.49287701302676	-3.79561827982457	0.00465207147978107	0.187050806123342	Cyp2c68	19	39677278	39729498	-	1724	protein_coding	cytochrome P450, family 2, subfamily c, polypeptide 68 [Source:MGI Symbol;Acc:MGI:3612287]	-	0	0	0	1	0	0	3	2	1	0	10	4	0	0	0	0.0422033201192007	0	0	0.165970208596885	0.0969654197802561	0.0571885770640536	0	0.591080434558863
ENSMUSG00000019838	639.748530702826	721.063381320224	650.015526935415	575.701194583292	703.929184879276	710.020187787087	798.184748462863	860.146851828259	840.429365403375	665.290144414473	871.334874001423	709.026572548835	666.74633436802	790.735426109871	-0.246063421009417	0.00467730418404079	0.187249446159886	Slc16a10	10	39909528	40018254	-	7356	protein_coding	solute carrier family 16 (monocarboxylic acid transporters), member 10 [Source:MGI Symbol;Acc:MGI:1919722]	-	609	687	611	702	826	686	754	934	772	643	764	823	7.80977581726726	8.85006087948901	7.9063700373199	6.94351329086765	8.59745472153887	8.62930110356474	9.77632817991014	10.6127834677056	10.3471830471325	8.10223131644692	10.5836503432997
ENSMUSG00000084929	175.431863099133	150.090339925462	132.98189994587	223.063710721731	204.531482289378	178.022554372273	336.634946964444	396.920014066359	190.511838012423	140.714556205861	293.10610290362	229.162901941665	177.353641725641	264.508393349062	-0.575069783633944	0.00469157722955191	0.187249446159886	Foxo6os	4	120148538	120161095	+	2306	lncRNA	forkhead box O6, opposite strand [Source:MGI Symbol;Acc:MGI:3028036]	-	167	143	125	272	240	172	318	431	175	136	257	266	6.83156435077879	5.8763543490884	5.1597464021954	8.58209822066632	7.96862719613094	6.90180002848788	13.1526712054767	15.6221971758891	7.48213083270815	5.46657097427534	11.3568441448017
ENSMUSG00000030131	0	0	0	0	0	0	11.6446050836757	3.68371242753002	0	0	34.214720183302	14.6457493722116	0	10.6981311777866	-5.90064880075818	0.00469602814820393	0.187249446159886	Mug2	6	121983720	122062924	+	4579	protein_coding	murinoglobulin 2 [Source:MGI Symbol;Acc:MGI:99836]	-	0	0	0	0	0	0	11	4	0	0	30	17	0	0	0	0	0	0	0.229122736829827	0.0730152363839972	0	0	0.66762786799267
ENSMUSG00000099906	59.8779412973088	14.6941591535417	12.7662623948036	14.7615690918793	19.6009337193987	7.2451039570111	42.3440184860935	70.9114642299528	14.1523079666371	87.9465976286629	43.3386455655158	44.7987627855886	21.4909949356572	50.5819661104085	-1.24009256982353	0.00471261730770003	0.187249446159886	Lincmd1	1	20740106	20754522	+	5551	lncRNA	long intergenic non-protein coding RNA of muscle differentiation 1 [Source:NCBI gene (formerly Entrezgene);Acc:105661730]	-	57	14	12	18	23	7	40	77	13	85	38	52	0.968649422173559	0.238994578946867	0.205772657094651	0.235931080875344	0.317240173863863	0.116686346122269	0.687281906253601	1.15942762970541	0.230897205757444	1.41932902480172	0.697583524208615
ENSMUSG00000035967	223.754412216259	204.668645352902	284.049338284379	241.105628500695	241.176706199558	234.94837117736	291.115127091893	337.059687118997	255.830182473825	301.087763646363	347.849655196903	248.977739327598	238.283850288526	296.98669247593	-0.316535784977742	0.00471633677359095	0.187249446159886	Ints6l	X	55500217	55553203	+	7173	protein_coding	integrator complex subunit 6 like [Source:MGI Symbol;Acc:MGI:2442593]	-	213	195	267	294	283	227	275	366	235	291	305	289	2.80118484460341	2.57611367039235	3.54313807815365	2.98215614419874	3.02076663119839	2.92831811680131	3.65660467009542	4.26485629685105	3.23008226846936	3.76034371745719	4.33294178307181
ENSMUSG00000057969	271.026471135187	167.933247469048	239.367419902567	163.197347182443	148.285324659799	166.637391011255	297.466729864807	224.706458079331	311.350775266017	261.770461177079	197.304886390375	280.853782078882	192.741200226717	262.242182142749	-0.44740565068783	0.00486114764533728	0.190996709766385	Sema3b	9	107474873	107486428	-	4777	protein_coding	sema domain, immunoglobulin domain (Ig), short basic domain, secreted, (semaphorin) 3B [Source:MGI Symbol;Acc:MGI:107561]	-	258	160	225	199	174	161	281	244	286	253	173	326	5.09480375322264	3.1739200519969	4.48337353280986	3.03097053657419	2.78885270626994	3.1186300750405	5.61044391413785	4.26932024524633	5.90279015313179	4.90908628457094	3.69041075503559
ENSMUSG00000020218	17.8583333693728	29.3883183070834	40.4264975835446	6.56069737416857	10.2265741144689	12.420178212019	57.1644249562263	95.7765231157805	127.370771699734	48.6292951593783	17.107360091651	18.9533227169798	19.4800998267762	60.8336162899583	-1.64908123514459	0.00488301831865288	0.191261957031787	Wif1	10	120869865	120936555	+	2427	protein_coding	Wnt inhibitory factor 1 [Source:MGI Symbol;Acc:MGI:1344332]	-	17	28	38	8	12	12	54	104	117	47	15	22	0.660757559489748	1.09325002697491	1.49036096491662	0.239830321831074	0.378567249985125	0.457514326204992	2.12212093662074	3.5816876606759	4.75294334669804	1.79499592614312	0.629803874647392
ENSMUSG00000040706	2.1009803963968	0	0	0	0.852214509539075	0	2.11720092430468	2.76278432064751	3.26591722307011	1.03466585445486	10.2644160549906	7.75363202058264	0.492199150989313	4.5331027330084	-3.2183402425707	0.00493631833357125	0.191794479765115	Agmat	4	141473983	141486574	+	1407	protein_coding	agmatine ureohydrolase (agmatinase) [Source:MGI Symbol;Acc:MGI:1923236]	-	2	0	0	0	1	0	2	3	3	1	9	9	0.134090772764883	0	0	0	0.0544173605611169	0	0.13557575911918	0.178217893071601	0.210219844047822	0.0658781338406651	0.651826867278985
ENSMUSG00000051373	1413.95980677505	2206.22303862462	1473.43945140024	1791.89047031979	1666.93158065843	1626.00833092349	2273.87379270322	2135.63227986053	2295.93980781829	1628.56405491195	2636.8144354598	1841.0568475539	1696.4087797836	2135.31353638461	-0.331582568633555	0.00500697094567449	0.193514317896293	Plpp7	2	31985540	32000832	+	2078	protein_coding	phospholipid phosphatase 7 (inactive) [Source:MGI Symbol;Acc:MGI:2445183]	-	1346	2102	1385	2185	1956	1571	2148	2319	2109	1574	2312	2137	61.1029969824678	95.8558031093423	63.4427320762106	76.5049926322531	72.0700590285685	69.9558229346302	98.5904571552732	93.2780273828185	100.063937615219	70.2092882627267	113.377305637293
ENSMUSG00000017453	0	0	2.12771039913393	0.820087171771072	0.852214509539075	0	7.41020323506637	3.68371242753002	1.0886390743567	2.06933170890971	13.6858880733208	2.58454400686088	0.633335346740679	5.08705308767408	-2.9764474010849	0.00502451966078099	0.193797053637211	Pipox	11	77771441	77784922	-	2470	protein_coding	pipecolic acid oxidase [Source:MGI Symbol;Acc:MGI:1197006]	-	0	0	2	1	1	0	7	4	1	2	12	3	0	0	0.0770744952451018	0.0294568922613368	0.0309980673317779	0	0.27030073918316	0.135359015142641	0.0399162375945055	0.0750530642217132	0.495071742111488
ENSMUSG00000046618	151.27058854057	141.693677552009	137.237320744138	146.795603747022	183.226119550901	125.236796971192	259.357113227323	256.938941820219	183.980003566283	174.858529402871	172.214091589287	148.180523060024	147.576684517639	199.254867111001	-0.430976950296965	0.00504600982530939	0.194230353804287	Olfml2a	2	38821990	38853765	+	5579	protein_coding	olfactomedin-like 2A [Source:MGI Symbol;Acc:MGI:2444741]	-	144	135	129	179	215	121	245	279	169	169	151	172	2.43483270194904	2.29302425606352	2.20095415127682	2.33442835194566	2.95062263067587	2.00688384468007	4.18847444029112	4.1799586890683	2.98659886342972	2.80779714985389	2.75806458229255
ENSMUSG00000036144	182.785294486522	131.197849585194	144.684307141107	103.330983643155	176.408403474588	110.74658905717	172.551875330831	248.650588858276	181.802725417569	177.962526966235	195.023905044821	172.302933790725	141.525571231289	191.38242590141	-0.43695210582288	0.00508273272296088	0.194508503361286	Meox2	12	37158539	37229533	+	2360	protein_coding	mesenchyme homeobox 2 [Source:MGI Symbol;Acc:MGI:103219]	Homeobox	174	125	136	126	207	107	163	270	167	172	171	200	6.95504974719346	5.01913933010766	5.48535263617259	3.88456525829375	6.71567874833251	4.19531913339859	6.58751698562542	9.56259822019357	6.97671561243964	6.75541182287132	7.38359645888521
ENSMUSG00000059908	0	2.0991655933631	3.19156559870089	0	0	0	23.2892101673514	11.9720653894726	0	0	157.387712843189	16.3687787101189	0.881788532010665	34.8362945183553	-5.32668971577996	0.00509431923472372	0.194508503361286	Mug1	6	121815500	121866016	+	5770	protein_coding	murinoglobulin 1 [Source:MGI Symbol;Acc:MGI:99837]	-	0	2	3	0	0	0	22	13	0	0	138	19	0	0.0328462220285728	0.0494906420941252	0	0	0	0.363657889755209	0.188317936578432	0	0	2.43717726770829
ENSMUSG00000000253	2652.48775045096	2616.6099121271	2451.12237980228	2428.27811561414	2652.94376819514	2425.03979589671	2929.14747877552	2683.58450345562	2846.79117944278	2578.3873093015	3203.63829982984	2898.99686102895	2537.74695368106	2856.7576053057	-0.170575118993795	0.00512578886331147	0.195316276646665	Gmpr	13	45660920	45707276	+	2323	protein_coding	guanosine monophosphate reductase [Source:MGI Symbol;Acc:MGI:1913605]	-	2525	2493	2304	2961	3113	2343	2767	2914	2615	2492	2809	3365	102.535715913147	101.696102852869	94.4084596427992	92.7412781855237	102.603335988569	93.3289343128843	113.607262710775	104.849046514246	110.986213704172	99.4338405122811	123.221466970519
ENSMUSG00000024863	0	0	0	1.64017434354214	0	0	2.11720092430468	6.44649674817753	0	0	18.2478507644277	4.30757334476813	0.273362390590357	5.18652029694634	-3.89029677601449	0.00516276604332226	0.196273725586031	Mbl2	19	30210342	30217087	+	1089	protein_coding	mannose-binding lectin (protein C) 2 [Source:MGI Symbol;Acc:MGI:96924]	-	0	0	0	2	0	0	2	7	0	0	16	5	0	0	0	0.133624469945826	0	0	0.17516537472974	0.537272123924762	0	0	1.49718665811494
ENSMUSG00000058454	105.04901981984	94.4624517013394	128.726479147603	104.971157986697	103.970170163767	116.956678163179	141.852461928413	154.715921956261	149.143553186868	115.882575698944	144.842315442645	129.227200343044	109.022659497071	139.277338092696	-0.354483481587806	0.00523617316618169	0.197242670030798	Dhcr7	7	143376882	143402147	+	5817	protein_coding	7-dehydrocholesterol reductase [Source:MGI Symbol;Acc:MGI:1298378]	-	100	90	121	128	122	113	134	168	137	112	127	150	1.62167541069443	1.46613745052758	1.97999436083063	1.60101273119207	1.60580326796595	1.79751534978003	2.19711040680867	2.41398388016118	2.32203122564977	1.78465529364748	2.22478732999474
ENSMUSG00000032035	324.601471243306	183.676989419271	203.19634311729	198.461095568599	253.959923842644	124.20178212019	359.924157131795	415.338576204009	256.918821548182	239.007812379072	268.015308102532	306.699222147491	214.68293421855	307.650649585514	-0.519711812764623	0.00523883530602447	0.197242670030798	Ets1	9	32547517	32669116	+	8476	protein_coding	E26 avian leukemia oncogene 1, 5' domain [Source:MGI Symbol;Acc:MGI:95455]	ETS	309	175	191	242	298	120	340	451	236	231	235	356	3.43898694192891	1.95649319805046	2.14496428868462	2.07734341438078	2.69188738086697	1.31003689204756	3.82590441525682	4.44743635259697	2.74515965297182	2.52613419378144	2.82527521539851
ENSMUSG00000049588	37.8176471351424	39.8841462738989	41.4903527831116	38.5440970732404	37.4974384197193	27.9454009770428	55.0472240319216	64.4649674817753	35.9250894537712	42.4213000326491	76.4128750760411	65.4751148404756	37.1965137770259	56.6244284861056	-0.607672472786896	0.00531793351159437	0.199033645933941	Ccdc69	11	54940557	54968957	-	1848	protein_coding	coiled-coil domain containing 69 [Source:MGI Symbol;Acc:MGI:1196234]	-	36	38	39	47	44	27	52	70	33	41	67	76	1.83765309039146	1.94855590962794	2.00881659279239	1.85046029362478	1.82298157879742	1.35193255239389	2.68378377710923	3.16606787312806	1.76059119390051	2.05644583704894	3.69450859496889
ENSMUSG00000021458	533.649020684788	449.221436979703	418.095093429817	510.914308013378	408.210750069217	431.601192867661	612.929667586204	573.7382105878	448.519298634962	609.418188273911	595.336131189454	499.678507993103	458.61530034076	556.603334044239	-0.278774571611772	0.00539727943051953	0.200407314113418	Aopep	13	63112707	63473910	+	11294	protein_coding	aminopeptidase O [Source:MGI Symbol;Acc:MGI:1919311]	-	508	428	393	623	479	417	579	623	412	589	522	580	4.2430575694323	3.59109775424483	3.31224469981286	4.01350809108091	3.24727673120652	3.41650058633417	4.88964046811217	4.61067394394474	3.59663184218811	4.83395827083739	4.7098444599937
ENSMUSG00000033634	0	0	0	0	0	2.07002970200317	9.52740415937105	12.8929934963551	0	0	60.4460056571668	5.16908801372176	0.345004950333862	14.6725818877691	-5.39398113264663	0.00540500407016472	0.200407314113418	Nat8f2	6	85842404	85846140	-	3301	protein_coding	N-acetyltransferase 8 (GCN5-related) family member 2 [Source:MGI Symbol;Acc:MGI:2136446]	-	0	0	0	0	0	2	9	14	0	0	53	6	0	0	0	0	0	0.0560631762950376	0.260041780933987	0.35449217991764	0	0	1.63611637281165
ENSMUSG00000021211	0	0	0	0	0	0	1.05860046215234	9.20928106882504	0	0	7.98343470943713	2.58454400686088	0	3.4726433745459	-4.28035694314222	0.00542772846614919	0.200407314113418	Akr1c12	13	4318175	4329432	-	1261	protein_coding	aldo-keto reductase family 1, member C12 [Source:MGI Symbol;Acc:MGI:1351661]	-	0	0	0	0	0	0	1	10	0	0	7	3	0	0	0	0	0	0	0.0756364365902803	0.662840538069634	0	0	0.565674756879965
ENSMUSG00000105176	126.058823783808	170.032413062411	147.875872739808	151.716126777648	170.442901907815	120.061722716184	160.907270247155	173.134484093911	195.955033384207	172.789197693961	223.53617186424	209.348064555731	147.697976831279	189.278370306534	-0.355098476894231	0.00550093264979388	0.201552618108803	Gm43668	3	34124808	34130149	+	5342	TEC	predicted gene 43668 [Source:MGI Symbol;Acc:MGI:5663805]	-	120	162	139	185	200	116	152	188	180	167	196	243	2.11904586986361	2.87370625037328	2.47678645193755	2.51971675754734	2.86653786257924	2.00931179466404	2.71385007003598	2.9415627233076	3.32211891323795	2.89766365226642	3.7388327060872
ENSMUSG00000027761	0	0	0	0	0	0	1.05860046215234	1.84185621376501	0	0	15.9668694188743	3.44605867581451	0	3.71889746176768	-4.36877733330459	0.0055023077179349	0.201552618108803	Aadac	3	59933138	59947581	+	1501	protein_coding	arylacetamide deacetylase [Source:MGI Symbol;Acc:MGI:1915008]	-	0	0	0	0	0	0	1	2	0	0	14	4	0	0	0	0	0	0	0.0635426692473974	0.111371341573059	0	0	0.950454188441886
ENSMUSG00000029246	519.992648108208	582.51845215826	469.160143009031	481.391169829619	601.663443734587	570.293182901873	708.203709179914	747.793622788594	620.524272383321	531.818249189797	661.484590210505	608.22935628126	537.503173290263	646.342300005565	-0.266096002350672	0.00554891435793949	0.202180768916057	Ppat	5	77061096	77099425	-	4421	protein_coding	phosphoribosyl pyrophosphate amidotransferase [Source:MGI Symbol;Acc:MGI:2387203]	-	495	555	441	587	706	551	669	812	570	514	580	706	10.5620368755592	11.8960754482244	9.49501644827325	9.6605413980524	12.2268830071253	11.532522536463	14.4328384156276	15.3518126628979	12.7116197487682	10.7765063644653	13.3687660738317
ENSMUSG00000031983	175.431863099133	133.297015178557	179.791528726817	151.716126777648	116.753387806853	165.602376160254	233.950702135667	204.446039727916	261.273377845609	207.967836745426	144.842315442645	176.610507135493	153.76538295821	204.848463172126	-0.415856019646511	0.00555148378056552	0.202180768916057	2310022B05Rik	8	125362495	125390108	-	3307	protein_coding	RIKEN cDNA 2310022B05 gene [Source:MGI Symbol;Acc:MGI:1916801]	-	167	127	169	185	137	160	221	222	240	201	127	205	4.76370952310127	3.63915679472602	4.86440982010325	4.07025307493737	3.17188872222568	4.47691672089311	6.37388502734076	5.61103434860264	7.1552300108929	5.63374581103023	3.91339216769864
ENSMUSG00000059851	105.04901981984	116.503690431652	120.215637551067	109.071593845553	109.083457221002	107.641544504165	136.559459617652	122.483438215373	166.561778376576	159.338541586048	156.247222170412	116.30448030874	111.260823895546	142.9158200458	-0.357183727443352	0.00562557600308063	0.204485908534244	Kmt5c	7	4743114	4750513	+	4001	protein_coding	lysine methyltransferase 5C [Source:MGI Symbol;Acc:MGI:2385262]	-	100	111	113	133	128	104	129	133	153	154	137	135	2.35773203299413	2.62897023527119	2.6883607058061	2.41861626512666	2.44947487318543	2.40523777490522	3.07515708665441	2.77847975909204	3.77024377639079	3.56769364766999	3.48928032185925
ENSMUSG00000046687	22.0602941621664	22.0412387303125	9.57469679610267	9.84104606125286	16.1920756812424	5.17507425500793	30.6994134024178	29.4696994202401	14.1523079666371	15.5199878168229	58.1650243116133	34.4605867581451	14.1474042810141	30.4111699459794	-1.10561344037885	0.00564588394920279	0.204768997595591	Gm5424	10	61906902	61908141	+	1240	processed_pseudogene	predicted gene 5424 [Source:MGI Symbol;Acc:MGI:3643173]	-	21	21	9	12	19	5	29	32	13	15	51	40	1.59757260600161	1.60482932387184	0.690873398910732	0.704114747279052	1.17317685474221	0.37311400191516	2.23060391102416	2.15701140259563	1.03363741061256	1.12125646347358	4.19114162323818
ENSMUSG00000068036	945.441178378561	751.501282423989	735.123942900772	766.781505605952	879.485373844325	581.678346262891	1046.95585706866	1022.23019863958	752.249600380482	909.471286065819	1108.55693393898	945.943106511082	776.668604902748	964.234497100768	-0.311714117317165	0.00580303990090292	0.208931501223003	Afdn	17	13980801	14126412	+	10325	protein_coding	afadin, adherens junction formation factor [Source:MGI Symbol;Acc:MGI:1314653]	-	900	716	691	935	1032	562	989	1110	691	879	972	1098	8.22271891293808	6.57134401893867	6.37038432200884	6.58878642449825	7.65281487180583	5.03662345093727	9.13592189137043	8.98580658151522	6.59833770839458	7.89103919243042	9.5931238202659
ENSMUSG00000026173	1493.79706183813	1749.65452206814	1547.90931536993	1380.20671009071	2058.9502550464	1671.54898436756	2243.1743793008	2399.93864653581	2011.80500941119	1580.96942560702	2074.55253378088	1835.88775954018	1650.34447479681	2024.38795902931	-0.2946097707899	0.00585731868099645	0.210485580988066	Plcd4	1	74582047	74606953	+	7045	protein_coding	phospholipase C, delta 4 [Source:MGI Symbol;Acc:MGI:107469]	-	1422	1667	1455	1683	2416	1615	2119	2606	1848	1528	1819	2131	19.0406422975465	22.4225935231945	19.6589194277224	17.3814898082754	26.2571450338866	21.2121533068928	28.6877247862296	30.9184391714143	25.8623224236162	20.103780898724	26.3108904930798
ENSMUSG00000038683	393.9338243244	400.940628332352	473.415563807299	434.646201038668	390.314245368896	401.585762188615	481.663210279314	468.752406403195	488.79894438616	440.767653997769	486.989517275665	527.246977399619	415.806037510038	482.369784956954	-0.215156441156887	0.00595306499122871	0.213117475999791	Pak1ip1	13	41154499	41166491	+	4045	protein_coding	PAK1 interacting protein 1 [Source:MGI Symbol;Acc:MGI:1915333]	-	375	382	445	530	458	388	455	509	449	426	427	612	8.74532064030549	8.94903236366607	10.4717467798089	9.53325529278518	8.66919002465935	8.87577792837684	10.7285002906938	10.5177635727925	10.9439567316278	9.76172252600384	10.7570501789774
ENSMUSG00000020601	323.550981045107	281.288189510655	252.13368229737	218.963274862876	369.008882630419	195.6178068393	304.876933099873	443.887347517367	335.300834901865	357.994385641381	376.361922016322	336.852235560868	273.427136197621	359.212276456279	-0.393508924723903	0.0059946495538863	0.213797878063086	Trib2	12	15841728	15866923	-	4335	protein_coding	tribbles pseudokinase 2 [Source:MGI Symbol;Acc:MGI:2145021]	-	308	268	237	267	433	189	288	482	308	346	330	391	6.70231152506328	5.85837184499468	5.20399524469783	4.4813208483112	7.64769157831829	4.03427900755879	6.33650136184981	9.29355950910725	7.00500044115247	7.39813722550871	7.75726599375382
ENSMUSG00000106951	80.8877452612769	57.7270538174852	78.7252847679553	77.9082813182518	72.4382333108213	62.1008910600951	91.0396397451011	88.4090982607204	74.0274570562558	124.159902534583	127.734955350994	90.4590402401308	71.6312482559809	99.3050155312975	-0.467189342067908	0.00606544252329498	0.2155109765594	5930430L01Rik	5	148926866	148932033	-	3994	lncRNA	RIKEN cDNA 5930430L01 gene [Source:MGI Symbol;Acc:MGI:2443110]	-	77	55	74	95	85	60	86	96	68	120	112	105	1.8186354820449	1.3049259590345	1.76360493751874	1.73061085856853	1.6294552419396	1.39006919091076	2.05369779731335	2.00903415564741	1.67860071766979	2.78489336946868	2.85754979840014
ENSMUSG00000027001	130.260784576602	98.6607828880656	86.1722711649241	85.2890658641915	93.7435960492982	95.2213662921458	136.559459617652	126.167150642903	132.813967071518	95.1892586098469	141.420843424315	145.595979053163	98.2246444725378	129.6244430699	-0.403584839788902	0.00626462662639046	0.220519514963908	Dusp19	2	80447389	80462705	+	2992	protein_coding	dual specificity phosphatase 19 [Source:MGI Symbol;Acc:MGI:1915332]	-	124	94	81	104	110	92	129	137	122	92	124	169	3.909516868774	2.97712799195477	2.57692083283548	2.5290396002982	2.81489802608424	2.84524367235838	4.11220036888513	3.82721734075186	4.02017347484234	2.85011001232321	4.22322229205399
ENSMUSG00000027832	102.948039423443	159.536585095595	157.450569535911	118.092552735034	118.457816825931	199.757866243306	201.134087808944	200.762327300386	204.66414597906	189.343851365239	155.106731497636	186.948683162937	142.70723830987	189.6599711857	-0.414506654167765	0.00632517411248824	0.221172876373826	Ptx3	3	66127331	66133226	+	2682	protein_coding	pentraxin related gene [Source:MGI Symbol;Acc:MGI:104641]	-	98	152	148	144	139	193	190	218	188	183	136	217	3.44691280638677	5.37051651154726	5.25267570503345	3.90649792673836	3.96814558427267	6.65873549130022	6.75679859905491	6.7939425143276	6.91107535025524	6.32452191626707	5.16730361701749
ENSMUSG00000035215	54.6254903063168	60.8758022075299	58.512035976183	59.8663635392882	53.6895141009617	58.9958465070904	80.4536351235777	55.2556864129503	84.9138477998228	73.4612756662949	104.925141895459	81.8438935505945	57.7608421062283	80.1422467414499	-0.467970408266116	0.00633422512523084	0.221172876373826	Lsm7	10	80688655	80691043	-	1601	protein_coding	LSM7 homolog, U6 small nuclear RNA and mRNA degradation associated [Source:MGI Symbol;Acc:MGI:1913344]	-	52	58	55	73	63	57	76	60	78	71	92	95	3.06390296644906	3.43295336167463	3.27000942506155	3.31753419340515	3.01287274047343	3.29440320491736	4.5276037083486	3.13244941351333	4.80341182695654	4.11057335183068	5.85572052245547
ENSMUSG00000073491	0	0	0	0.820087171771072	1.70442901907815	1.03501485100159	7.41020323506637	10.1302091757075	0	1.03466585445486	10.2644160549906	2.58454400686088	0.593255173641801	5.23733972118004	-3.06597237132687	0.00636164778212945	0.221172876373826	Ifi213	1	173393849	173426840	-	6840	protein_coding	interferon activated gene 213 [Source:MGI Symbol;Acc:MGI:3695276]	-	0	0	0	1	2	1	7	11	0	1	9	3	0	0	0	0.0106372110943716	0.0223874930729507	0.013528110010959	0.0976086002605854	0.134419021981928	0	0.0135512477066982	0.134081930155195
ENSMUSG00000030806	39.9186275315392	31.4874839004465	21.2771039913393	26.2427894966743	23.8620062670941	20.7002970200317	41.2854180239412	64.4649674817753	37.0137285281279	41.3866341781943	39.9171735471856	35.3221014270987	27.2480513678542	43.2316705310538	-0.671962419510344	0.0064080044749318	0.221855189664092	Stx1b	7	127403072	127423721	-	4802	protein_coding	syntaxin 1B [Source:MGI Symbol;Acc:MGI:1930705]	-	38	30	20	32	28	20	39	70	34	40	35	41	0.746490759750857	0.592011769382128	0.396447320398587	0.484854803068735	0.446444468276918	0.385390555914034	0.774619807387213	1.21842845263237	0.698076974841018	0.772099411193801	0.742727892987959
ENSMUSG00000027776	33.6156863423488	25.1899871203572	34.0433663861428	22.96244080959	36.6452239101802	33.1204752320507	44.4612194103982	53.4138301991853	44.6342020486248	35.1786390514651	54.7435522932832	45.6602774545422	30.9295299667783	46.3486200762498	-0.586194824069895	0.00644420485905509	0.222701371570776	Il12a	3	68597977	68605880	+	1773	protein_coding	interleukin 12a [Source:MGI Symbol;Acc:MGI:96539]	-	32	24	32	28	43	32	42	58	41	34	48	53	1.70256710461537	1.28272555739333	1.71798310890379	1.14903478217375	1.85691186198992	1.67006921556611	2.25936658471203	2.73428264373022	2.27993084105785	1.77748345553849	2.75877541571433
ENSMUSG00000031849	105.04901981984	269.742778747158	234.048143904732	136.954557685769	100.561312125611	127.306826673195	557.882443554282	620.705544038808	763.135991124049	342.474397824558	91.2392538221386	147.31900839107	162.277106492718	420.459439792484	-1.37394691521404	0.0065158265657639	0.22476634517748	Comp	8	70826208	70834716	+	2967	protein_coding	cartilage oligomeric matrix protein [Source:MGI Symbol;Acc:MGI:88469]	-	100	257	220	167	118	123	527	674	701	331	80	171	3.17940204381851	8.20817899965459	7.05801832089456	4.09527249372391	3.0450612418335	3.8360193847051	16.9410067498352	18.9874436492388	23.2941583780783	10.3406022439747	2.74761757783479
ENSMUSG00000099207	1.0504901981984	0	2.12771039913393	0.820087171771072	0	2.07002970200317	6.35160277291403	5.52556864129503	3.26591722307011	9.31199269009372	3.4214720183302	2.58454400686088	1.01138624518443	5.07684955876066	-2.367158908738	0.0065707542716298	0.225440736918741	Gm10637	8	87896375	87926478	-	3612	lncRNA	predicted gene 10637 [Source:MGI Symbol;Acc:MGI:3641741]	-	1	0	2	1	0	2	6	6	3	9	3	3	0.0261165167885092	0	0.0527059809677191	0.0201435558929961	0	0.0512360312707417	0.1584344626916	0.13884417250927	0.0818879625070004	0.230956480848378	0.0846364343172325
ENSMUSG00000070871	309.894608468528	376.800224008676	329.795111865759	382.980709217091	409.915179088295	402.620777039617	455.198198725506	531.375517671205	438.721546965751	475.946293049234	453.915287765139	348.913440926219	368.667768281328	450.678380850509	-0.287798702362055	0.0067714163228205	0.230642234391321	Ccnyl1	1	64729614	64764803	+	3456	protein_coding	cyclin Y-like 1 [Source:MGI Symbol;Acc:MGI:2138614]	-	295	359	310	467	481	389	430	577	403	460	398	405	8.0521392647072	9.84355464361206	8.53818590989214	9.83166396253745	10.6562134996717	10.4152355303123	11.8669979781099	13.954883882461	11.4968235138735	12.3372817663065	11.7352726369628
ENSMUSG00000040963	1.0504901981984	0	0	1.64017434354214	0	2.07002970200317	2.11720092430468	5.52556864129503	5.44319537178351	2.06933170890971	12.5453974005441	2.58454400686088	0.793449040623952	5.04753967561631	-2.64312057408203	0.00682066616164428	0.231900250067075	Asgr2	11	69983470	69997013	+	1574	protein_coding	asialoglycoprotein receptor 2 [Source:MGI Symbol;Acc:MGI:88082]	-	1	0	0	2	0	2	2	6	5	2	11	3	0.0599319305210262	0	0	0.0924504750768768	0	0.117575949777585	0.121191291664985	0.318618266266509	0.313192842625249	0.11777704487143	0.712150531192775
ENSMUSG00000022965	1151.33725722545	1158.73940753643	1183.00698191846	1185.84605038097	1298.77491253755	1049.50505891561	1474.63044377821	1557.28942873831	1351.00109127667	1092.60714230433	1583.0010538141	1261.25747534811	1171.20161141908	1386.63110587662	-0.242942751307438	0.00683284082466087	0.231900250067075	Ifngr2	16	91343960	91362511	+	3767	protein_coding	interferon gamma receptor 2 [Source:MGI Symbol;Acc:MGI:107654]	-	1096	1104	1112	1446	1524	1014	1393	1691	1241	1056	1388	1464	27.4459286088517	27.7718425829269	28.0987379373516	27.9290750035667	30.9756848674449	24.9078110670584	35.2696900267317	37.5208039339878	32.4805005604751	25.983860959753	37.5472117021799
ENSMUSG00000053219	0	0	0	1.64017434354214	0	0	5.29300231076169	4.60464053441252	0	4.13866341781943	13.6858880733208	0	0.273362390590357	4.62036572271907	-3.71897953937797	0.00692283450313073	0.233282277260302	Raet1e	10	22034468	22250038	+	2159	protein_coding	retinoic acid early transcript 1E [Source:MGI Symbol;Acc:MGI:2675273]	-	0	0	0	2	0	0	5	5	0	4	12	0	0	0	0	0.0674002073974081	0	0	0.220883618666845	0.193571542034694	0	0.171728641618927	0.566385920803787
ENSMUSG00000037104	242.663235783831	351.610236888319	274.474641488277	298.51173052467	267.595355995269	278.418994919426	352.513953896729	407.971151348949	304.818940819877	338.335734406738	329.601804432476	343.744352912497	285.545699266632	346.164322969544	-0.279197466589086	0.00704199124018072	0.235424411392441	Socs5	17	87415107	87445267	+	6416	protein_coding	suppressor of cytokine signaling 5 [Source:MGI Symbol;Acc:MGI:2385459]	-	231	335	258	364	314	269	333	443	280	327	289	399	3.39633577709819	4.94779495558992	3.82765686096428	4.12782149225728	3.7471136317301	3.87954820694578	4.95023737498977	5.77116536624179	4.3026916958167	4.72409674573219	4.59004911771929
ENSMUSG00000027524	7.35343138738881	3.14874839004465	1.06385519956696	2.46026151531322	9.37435960492982	0	19.0548083187421	20.2604183514151	14.1523079666371	6.20799512672914	13.6858880733208	3.44605867581451	3.90010934954058	12.8012460854431	-1.69373098383413	0.00707595498469153	0.235923301936775	Edn3	2	174602412	174625835	+	4113	protein_coding	endothelin 3 [Source:MGI Symbol;Acc:MGI:95285]	-	7	3	1	3	11	0	18	22	13	6	12	4	0.16054704850004	0.069118417616654	0.0231429617378315	0.0530696746064931	0.20476963029526	0	0.417407205865836	0.447082961515385	0.311624213265152	0.135215950858958	0.297307853881686
ENSMUSG00000089847	22.0602941621664	31.4874839004465	26.5963799891741	29.5231381837586	44.3151544960319	46.5756682950713	41.2854180239412	40.5208367028302	55.5205927921918	50.698626868288	68.4294403666039	54.2754241440785	33.4263531711081	51.7883898163223	-0.6245279464625	0.00716094960098107	0.237919409725227	Timm10b	7	105289263	105292844	+	3582	protein_coding	translocase of inner mitochondrial membrane 10B [Source:MGI Symbol;Acc:MGI:1315196]	-	21	30	25	36	52	45	39	44	51	49	60	63	0.553040209782803	0.793646152030423	0.664342557423931	0.731241446085447	1.11149965608419	1.16246573461004	1.03844899918297	1.02671815785191	1.40375445275819	1.26796096632523	1.70690564351672
ENSMUSG00000037692	463.266177405495	459.717264946519	445.755328618558	474.830472455451	513.033134742523	485.421965119743	582.230254183786	628.993897000751	483.355749014376	549.407568715529	553.137976296715	503.986081337871	473.670723881381	550.185254424838	-0.215330241244918	0.00719008039457717	0.23805199739948	Ahdc1	4	132738571	132805421	+	8444	protein_coding	AT hook, DNA binding motif, containing 1 [Source:MGI Symbol;Acc:MGI:2444218]	-	441	438	419	579	602	469	550	683	444	531	485	585	4.92666871865016	4.91538033419771	4.72327731904389	4.98900821052886	5.45858197990453	5.13946421017954	6.21241717162351	6.76077724229591	5.18419462874731	5.82883393186123	5.85298430307967
ENSMUSG00000039084	113.452941405427	375.750641211995	308.518007874419	166.477695869528	117.605602316392	102.466470249157	705.027907793457	716.482067154588	966.711498028752	450.079646687863	117.470539296003	213.655637900499	197.378559821153	528.237882810194	-1.42057755887534	0.00729273036782185	0.24060928171744	Chad	11	94455873	94459953	+	1680	protein_coding	chondroadherin [Source:MGI Symbol;Acc:MGI:1096866]	-	108	358	290	203	138	99	666	778	888	435	103	248	6.06425519829183	20.1931925581969	16.4310895666864	8.79165496949816	6.28928644685108	5.45279462798869	37.8103845213504	38.7074412260428	52.1134993394551	24.0002276348273	6.24757945985038
ENSMUSG00000048373	287.834314306362	257.14778518698	167.025266332013	213.222664660479	288.048504224207	182.162613776279	316.521538183549	309.431843912521	308.084858042947	247.285139214711	320.477879050262	298.084075457955	232.57352474772	299.980888976991	-0.365872587227807	0.00736055690867973	0.242424742150568	Fgfbp1	5	44136200	44139121	-	2263	protein_coding	fibroblast growth factor binding protein 1 [Source:MGI Symbol;Acc:MGI:1096350]	-	274	245	157	260	338	176	299	336	283	239	281	346	11.4216541172718	10.2591828923314	6.60378226051658	8.35935316404353	11.4357253612939	7.19650020132253	12.6018057514639	12.4102025902762	12.3295842867588	9.78923451215288	12.6533526309957
ENSMUSG00000061353	1271.09313982007	1237.45811728755	1235.13588669724	1657.39617414934	1313.26255919971	1116.78102423071	1780.56597734023	2036.17204431722	1418.49671388678	1363.6895961715	1536.24093623026	1456.82130520058	1305.18781689744	1598.66442885776	-0.292149532552939	0.0073790092213405	0.242610549711365	Cxcl12	6	117145496	117158328	+	8176	protein_coding	chemokine (C-X-C motif) ligand 12 [Source:MGI Symbol;Acc:MGI:103556]	-	1210	1179	1161	2021	1541	1079	1682	2211	1303	1318	1347	1691	13.960709265474	13.6648278255037	13.5166473690999	17.9849531277641	14.4308969842131	12.2116342955579	19.6214571038231	22.6033082413936	15.7126734633723	14.9420406342477	16.78844832907
ENSMUSG00000038855	653.404903279405	437.676026216206	522.352902987379	437.926549725752	491.727772004046	407.795851294625	706.08650825561	734.900629292238	587.86510015262	515.263595518519	532.609144186734	613.398444294982	491.814000917902	615.02057028345	-0.323835431167755	0.00747947375128254	0.244584683188908	Itpkb	1	180158050	180252367	+	10463	protein_coding	inositol 1,4,5-trisphosphate 3-kinase B [Source:MGI Symbol;Acc:MGI:109235]	-	622	417	491	534	577	394	667	798	540	498	467	712	5.60785989430749	3.77668767852092	4.46686588924793	3.71337587258512	4.22232013577144	3.48444187662564	6.08017046185693	6.37486238141675	5.08843330818612	4.41172570852339	4.54825180643044
ENSMUSG00000056966	37.8176471351424	7.34707957677084	21.2771039913393	14.7615690918793	15.3398611717033	11.3851633610174	30.6994134024178	41.4417648097127	47.9001192716949	32.0746414881006	26.2312854738648	24.1224107307015	17.9880707213088	33.7449391960821	-0.912648362291313	0.00749071265442849	0.244584683188908	Gjc3	5	137951723	137961360	-	4356	protein_coding	gap junction protein, gamma 3 [Source:MGI Symbol;Acc:MGI:2153041]	-	36	7	20	18	18	11	29	45	44	31	23	28	0.779610401984258	0.15227948895019	0.437038574966487	0.300655057378107	0.316385232683849	0.233667354734746	0.634974483395308	0.863473056307653	0.995889968266954	0.659643380102913	0.538051455260056
ENSMUSG00000029270	276.278922126179	284.4369379007	300.007166277884	305.89251507061	348.555734401482	324.994663214498	386.389168685604	387.710732997534	459.405689378529	277.290448993902	390.047810089642	361.836160960523	306.694323165225	377.113335184289	-0.296263278266977	0.00751270794492463	0.244880659313223	Dipk1a	5	108055919	108134951	-	2892	protein_coding	divergent protein kinase domain 1A [Source:MGI Symbol;Acc:MGI:1914516]	-	263	271	282	373	409	314	365	421	422	268	342	420	8.57867974493258	8.87978077444994	9.28172007573016	9.38413879989359	10.8282080085	10.0467266795081	12.0376225751125	12.1676849132415	14.3866843341137	8.58957925176439	12.0506830172677
ENSMUSG00000078502	2.1009803963968	3.14874839004465	2.12771039913393	3.28034868708429	0	0	6.35160277291403	3.68371242753002	10.886390743567	8.27732683563886	3.4214720183302	7.75363202058264	1.77629797877661	6.72902280309379	-1.92326717080347	0.00774208214105855	0.251017893389606	Zfp268	4	145311736	145351915	+	3595	protein_coding	zinc finger protein 268 [Source:MGI Symbol;Acc:MGI:3651014]	zf-C2H2	2	3	2	4	0	0	6	4	10	8	3	9	0.0524800326231406	0.0790776221578019	0.0529552164827264	0.0809552421535488	0	0	0.159183665992228	0.0930004916279063	0.27425064494695	0.206265444926433	0.0850366622402904
ENSMUSG00000031444	1.0504901981984	3.14874839004465	2.12771039913393	0	0	0	0	2.76278432064751	3.26591722307011	1.03466585445486	37.6361922016322	5.16908801372176	1.05449149789616	8.31144126892107	-3.01865276710346	0.00780172251621133	0.251273845258521	F10	8	13087308	13106676	+	2731	protein_coding	coagulation factor X [Source:MGI Symbol;Acc:MGI:103107]	-	1	3	2	0	0	0	0	3	3	1	33	6	0.0345415081069554	0.104095222137421	0.0697085328653979	0	0	0	0	0.0918171276278808	0.108304401528849	0.0339401443844071	1.23133460574598
ENSMUSG00000033044	2250.15000454097	2793.98940476628	2856.4512108373	2581.63441673533	2575.39224782708	2821.45048383032	3057.23813469595	2946.04901391713	3468.40409090046	2695.3045508549	3319.96834845307	2831.79871685057	2646.51129475622	3053.12714261201	-0.206008589875846	0.00785473107135949	0.252132194625037	Dhrs7c	11	67689013	67706828	+	1877	protein_coding	dehydrogenase/reductase (SDR family) member 7C [Source:MGI Symbol;Acc:MGI:1915710]	-	2142	2662	2685	3148	3022	2726	2888	3199	3186	2605	2911	3287	107.65102994517	134.392496095139	136.162546281501	122.026549382824	123.271238096581	134.386241218295	146.750322007731	142.453825109221	167.350899547657	128.640832119068	158.038092167366
ENSMUSG00000120402	38.8681373333408	73.4707957677084	82.9807055662232	59.8663635392882	68.177160763126	57.9608316560888	112.211648988148	79.1998171918954	102.33207298953	53.8026244316526	115.18955795045	97.3511575917598	63.5539991042959	93.3478131905726	-0.55299278388477	0.00785500025497791	0.252132194625037	ENSMUSG00000120402	17	26727622	26728000	+	379	lncRNA	novel transcript, antisense to Dusp1	-	37	70	78	73	80	56	106	86	94	52	101	113	9.20927643715969	17.502096408101	19.5899370104503	14.0141747853342	16.1615253423729	13.6723146664848	26.6755143358217	18.9663337708442	24.4531716218794	12.7174347871198	27.1560130836748
ENSMUSG00000039936	328.803432036099	375.750641211995	354.263781455799	336.235740426139	321.284870096231	288.769143429442	434.026189482459	406.129295135184	362.516811760782	315.573085608731	512.080312076753	429.034305138906	334.184601442618	409.893333200469	-0.294498375156458	0.00793879114325403	0.253105768806304	Pik3cd	4	149733625	149787028	-	6259	protein_coding	phosphatidylinositol-4,5-bisphosphate 3-kinase catalytic subunit delta [Source:MGI Symbol;Acc:MGI:1098211]	-	313	358	333	410	377	279	410	441	333	305	449	498	4.71739650972197	5.42012517938502	5.06427089663275	4.76609598866525	4.61177349715262	4.12470107373602	6.24777026386656	5.88922010003293	5.24548723180327	4.51679389131072	7.31013226492389
ENSMUSG00000107334	0	0	0	0	0	0	2.11720092430468	3.68371242753002	0	1.03466585445486	5.70245336388366	2.58454400686088	0	2.52042942950568	-3.81517788239803	0.00800015902234423	0.254256077141998	Gm7538	5	119332549	119338083	-	1348	lncRNA	predicted gene 7538 [Source:MGI Symbol;Acc:MGI:3647618]	-	0	0	0	0	0	0	2	4	0	1	5	3	0	0	0	0	0	0	0.141509712967869	0.248024308161961	0	0.0687615239716734	0.377975767499807
ENSMUSG00000003949	329.853922234298	414.585204689212	327.667401466625	364.118704266356	452.525904565249	289.804158280444	492.249214900837	593.077700832333	419.126043627331	348.682392951287	515.501784095083	415.250070435648	363.092549250364	463.98120114042	-0.35260795552493	0.00802520645370879	0.254256077141998	Hlf	11	90227362	90281721	-	6681	protein_coding	hepatic leukemia factor [Source:MGI Symbol;Acc:MGI:96108]	TF_bZIP	314	395	308	444	531	280	465	644	385	337	452	482	4.43354551908246	5.60256450654256	4.38820483480495	4.83532174901405	6.08533680142792	3.87801770588066	6.63831150146082	8.05691057502979	5.68153661734695	4.67545428285525	6.8941512718025
ENSMUSG00000000938	234.259314198243	213.065307726354	229.792723106464	263.247982138514	241.176706199558	261.858757303401	261.474314151628	295.617922309284	336.389473976221	254.527800195895	279.420214830299	304.11467814063	240.566798445423	288.590733933993	-0.261428193839311	0.00802857398515761	0.254256077141998	Hoxa10	6	52208177	52217834	-	3270	protein_coding	homeobox A10 [Source:MGI Symbol;Acc:MGI:96171]	Homeobox	223	203	216	321	283	253	247	321	309	246	245	353	6.43309708768845	5.88273827588496	6.287581758894	7.14235050986121	6.626287169904	7.15922475112072	7.20435902001983	8.20505369542399	9.31659633616342	6.97304937039715	7.63487932565665
ENSMUSG00000086240	13.6563725765792	34.6362322904911	25.5325247896071	19.6820921225057	6.8177160763126	14.4902079140222	35.9924157131795	29.4696994202401	38.1023676024846	28.970643924736	49.0410989293995	26.7069547375624	19.135857628253	34.7138633879337	-0.864053777631653	0.00807147105400229	0.254343427732038	Gm7846	1	28619580	28619853	-	274	processed_pseudogene	predicted gene 7846 [Source:MGI Symbol;Acc:MGI:3645212]	-	13	33	24	24	8	14	34	32	35	28	43	31	4.47564657781473	11.4128633877017	8.33754758782781	6.37300939143083	2.23548106013114	4.72792633083735	11.8351700086558	9.7616574424036	12.5940100001642	9.47202540433154	15.9919615966123
ENSMUSG00000035875	2.1009803963968	1.04958279668155	1.06385519956696	0.820087171771072	0	3.10504455300476	6.35160277291403	5.52556864129503	2.17727814871341	2.06933170890971	20.5288321099812	2.58454400686088	1.35659168623686	6.53952623144571	-2.29200206118762	0.00809848383791418	0.254343427732038	AI182371	2	34971873	34991555	-	3050	protein_coding	expressed sequence AI182371 [Source:MGI Symbol;Acc:MGI:2138853]	-	2	1	1	1	0	3	6	6	2	2	18	3	0.0618576122230133	0.0310692952630926	0.0312088529926888	0.0238552537329515	0	0.0910153499753701	0.187627960407233	0.164427918394585	0.0646512176120843	0.0607806782385677	0.60139042771248
ENSMUSG00000028197	190.138725873911	142.743260348691	156.386714336344	91.84976323836	151.694182697955	155.252227650238	246.653907681495	247.729660751394	132.813967071518	127.263900097947	237.22205993756	298.945590126908	148.010812357583	215.104847611137	-0.543250639581302	0.00813375993382446	0.254435231428857	Col24a1	3	144998233	145257766	+	7621	protein_coding	collagen, type XXIV, alpha 1 [Source:MGI Symbol;Acc:MGI:1918605]	-	181	136	147	112	178	150	233	269	122	123	208	347	2.24042086522205	1.69105677406257	1.83604372644955	1.06927629906524	1.78829684858804	1.8212624158567	2.91601736568692	2.95028836213177	1.57831767966517	1.49598946602799	2.78121919944012
ENSMUSG00000078815	1959.16421964002	2322.72672905627	2171.32846231617	2181.43187691105	2203.82672166805	2249.08727122644	2338.44842089452	2534.39415014065	2756.43413627117	2132.44632603146	2729.19417995472	2417.41016108388	2181.26088013633	2484.72122906273	-0.187650509426457	0.00816650685908628	0.254435231428857	Cacng6	7	3472711	3484183	+	1977	protein_coding	calcium channel, voltage-dependent, gamma subunit 6 [Source:MGI Symbol;Acc:MGI:1859168]	-	1865	2213	2041	2660	2586	2173	2209	2752	2532	2061	2393	2806	88.9887614384307	106.073277072602	98.2684220142323	97.8946249546967	100.150569163553	101.705932265092	106.570055795457	116.34987150875	126.270989663905	96.6288271222935	123.344524397901
ENSMUSG00000006522	0	0	0	4.10043585885536	0	7.2451039570111	12.7032055458281	14.7348497101201	5.44319537178351	1.03466585445486	71.8509123849341	15.5072640411653	1.89092330264441	20.2123488180477	-3.41030107291737	0.00819545311921021	0.254435231428857	Itih3	14	30630529	30645717	-	3638	protein_coding	inter-alpha trypsin inhibitor, heavy chain 3 [Source:MGI Symbol;Acc:MGI:96620]	-	0	0	0	5	0	7	12	16	5	1	63	18	0	0	0	0.0999979712555003	0	0.178044504487278	0.314604331633898	0.367605021882708	0.135504544885141	0.0254784316420604	1.76466267614918
ENSMUSG00000074918	39.9186275315392	57.7270538174852	53.1927599783482	50.8454046498064	35.7930094006411	35.1905049340539	59.2816258805309	78.2788890850129	45.7228411229815	66.2186146851109	60.4460056571668	85.289952226409	45.444560051979	65.8729881095353	-0.543584633058793	0.00824546981450752	0.255151482593372	Inafm2	2	118576239	118579291	+	3053	protein_coding	InaF motif containing 2 [Source:MGI Symbol;Acc:MGI:1915354]	-	38	55	50	62	42	34	56	85	42	64	53	99	1.17413974068903	1.70713209314897	1.55890929622831	1.47757238155949	1.05330478381875	1.03049369936083	1.74947350352415	2.32710655332439	1.35634146349623	1.94307048676194	1.76902068347568
ENSMUSG00000086825	165.977451315347	170.032413062411	128.726479147603	141.875080716395	153.398611717033	131.446886077201	212.77869289262	151.953137635613	179.625447268856	164.511870858322	215.552737154802	197.28685919038	148.576153672665	186.951457500099	-0.330067383929222	0.00838026540748208	0.256187805264398	Gm15675	1	130357518	130364928	-	3681	lncRNA	predicted gene 15675 [Source:MGI Symbol;Acc:MGI:3783117]	-	158	162	121	173	180	127	201	165	165	159	189	229	4.04906049039257	4.17042618568163	3.12893974380652	3.41951226085081	3.7440208464299	3.19250165833194	5.20806488851101	3.74664266648895	4.41941391785947	4.00374761094722	5.23214573417337
ENSMUSG00000030587	2.1009803963968	3.14874839004465	2.12771039913393	2.46026151531322	1.70442901907815	3.10504455300476	10.5860046215234	1.84185621376501	7.62047352049692	3.10399756336457	9.12392538221386	15.5072640411653	2.44119571216192	7.96392022375484	-1.71683651694033	0.00848229022120299	0.257071417064654	2200002D01Rik	7	28945986	28947891	-	1564	protein_coding	RIKEN cDNA 2200002D01 gene [Source:MGI Symbol;Acc:MGI:1919525]	-	2	3	2	3	2	3	10	2	7	3	8	18	0.120630254015467	0.181767296456073	0.121722508475321	0.139562385969633	0.097909496559452	0.177491571243529	0.609830860232375	0.106885155819157	0.441273496169437	0.177795142545682	0.521239216971601
ENSMUSG00000025196	2.1009803963968	1.04958279668155	2.12771039913393	3.28034868708429	2.55664352861722	0	7.41020323506637	6.44649674817753	4.35455629742681	4.13866341781943	21.6693227827579	1.72302933790725	1.85254430131896	7.62371196985922	-1.99442992112901	0.00851752995423143	0.25715102790953	Cpn1	19	43944746	43974995	-	3688	protein_coding	carboxypeptidase N, polypeptide 1 [Source:MGI Symbol;Acc:MGI:2135874]	-	2	1	2	4	3	0	7	7	4	4	19	2	0.0511566478525462	0.0256945093688808	0.0516198490388833	0.0789138003096551	0.0622819086031655	0	0.181031134973537	0.158646784965853	0.106933955377905	0.100532032878325	0.524984563839754
ENSMUSG00000050914	9.45441178378561	9.44624517013394	22.3409591909062	17.2218306071925	21.3053627384769	4.14005940400634	39.1682170996365	35.9161961684177	17.4182251897072	18.6239853801874	36.4957015288554	20.676352054887	13.9848114824169	28.0497795702819	-0.99164282345821	0.00852734425637262	0.25715102790953	Ankrd37	8	46449939	46458744	-	1539	protein_coding	ankyrin repeat domain 37 [Source:MGI Symbol;Acc:MGI:3603344]	-	9	9	21	21	25	4	37	39	16	18	32	24	0.551654144094124	0.554159944751068	1.29884797542672	0.99280636880802	1.24374961516393	0.24049973352816	2.29302743469312	2.11811792213947	1.02500955798236	1.08409981653586	2.11882556294629
ENSMUSG00000069920	21.009803963968	23.0908215269941	25.5325247896071	13.9414819201082	8.52214509539075	16.5602376160254	32.8166143267225	39.5999085959477	41.3682848255547	32.0746414881006	13.6858880733208	31.8760427512842	18.1095024853489	31.9035633434884	-0.835271984907639	0.00860684910016342	0.258099684694022	B3gnt9	8	105979270	105981785	-	2516	protein_coding	UDP-GlcNAc:betaGal beta-1,3-N-acetylglucosaminyltransferase 9 [Source:MGI Symbol;Acc:MGI:2142841]	-	20	22	24	17	10	16	31	43	38	31	12	37	0.749863741177227	0.828596864925881	0.907984117275365	0.491611647875014	0.304313300117216	0.58844052448305	1.17516054958293	1.42850566358306	1.48908507973779	1.14205348319884	0.486020350960006
ENSMUSG00000095098	365.570588973043	366.304396041861	446.819183818125	375.599924671151	395.427532426131	437.811281973671	444.612194103982	413.496719990244	534.521785509141	402.485017382939	548.576013605608	526.385462730666	397.92215131733	478.346198887097	-0.265548371662867	0.00862349000359562	0.258099684694022	Ccdc85b	19	5503208	5507922	-	4715	protein_coding	coiled-coil domain containing 85B [Source:MGI Symbol;Acc:MGI:2147607]	-	348	349	420	458	464	423	420	449	491	389	481	611	6.96242519761466	7.01414874714718	8.47901180989063	7.06752999778577	7.53473276937519	8.30141065894123	8.49598505767641	7.95955506700123	10.2670658467632	7.64721481401365	10.3955440906751
ENSMUSG00000024063	127.109313982006	124.900352805104	127.662623948036	118.912639906805	99.7090976160717	102.466470249157	167.258873020069	163.004274918203	143.700357815085	170.719865985051	111.76808593212	136.980832363627	116.793416417863	148.905381672359	-0.353921315152749	0.00862798138842919	0.258099684694022	Lbh	17	73225300	73248942	+	3212	protein_coding	limb-bud and heart [Source:MGI Symbol;Acc:MGI:1925139]	-	121	119	120	145	117	99	158	177	132	165	98	159	3.55363508575701	3.51077232744068	3.55617689767251	3.28455353779508	2.78895749632955	2.85202209683095	4.69167258822362	4.60597819350959	4.05177151472994	4.76150005036725	3.10909780758372
ENSMUSG00000021253	634.496079711834	620.303432838796	596.822766957067	545.357969227763	610.185588829977	607.553717537931	673.269893928887	704.510001765116	715.235871852354	701.503449320393	635.25330473664	644.412972377313	602.453259183894	679.03091566345	-0.173803407386072	0.00864057451135337	0.258099684694022	Tgfb3	12	86103519	86125815	-	3383	protein_coding	transforming growth factor, beta 3 [Source:MGI Symbol;Acc:MGI:98727]	-	604	591	561	665	716	587	636	765	657	678	557	748	16.8421657164107	16.5545250299993	15.7847791643926	14.3022224013771	16.2047596918699	16.0557032050846	17.9308659768426	18.9009479059102	19.1474050268955	18.576465345778	16.7778784136261
ENSMUSG00000032537	15.757352972976	9.44624517013394	8.51084159653571	13.1213947483371	11.078788624008	20.7002970200317	25.4064110916561	19.3394902445326	27.2159768589176	20.6933170890971	15.9668694188743	31.8760427512842	13.1024866886704	23.4163512423936	-0.844762828062727	0.00897449755127454	0.265146699884613	Ephb1	9	101799327	102231892	-	7002	protein_coding	Eph receptor B1 [Source:MGI Symbol;Acc:MGI:1096337]	-	15	9	8	16	13	20	24	21	25	20	14	37	0.20208410162831	0.121801221789759	0.108754072125337	0.166257695253932	0.142151948303826	0.264302406383775	0.32691532661643	0.250680952422479	0.352017662305157	0.264754453909785	0.203746320601438
ENSMUSG00000049804	232.158333801847	206.767810946265	220.218026310361	268.16850516914	230.09791757555	220.458163263338	259.357113227323	338.901543332762	199.220950607277	365.237046622565	285.122668194183	298.945590126908	229.644792844417	291.13081868517	-0.342150267702381	0.00899687910424973	0.265393919744987	Armcx4	X	133587268	133597506	+	7996	protein_coding	armadillo repeat containing, X-linked 4 [Source:MGI Symbol;Acc:MGI:2147887]	-	221	197	207	327	270	213	245	368	183	353	250	347	2.60724884435481	2.33466559014873	2.46419576499926	2.97549241002491	2.58536907248158	2.46490420674917	2.92239856207906	3.84679622323834	2.25644554215763	4.09201583451438	3.18603886061618
ENSMUSG00000048096	71.4333334774913	83.9666237345239	101.066243958862	71.3475839440832	80.108163896673	89.0112771861363	140.793861466261	105.906732291488	149.143553186868	69.3226122484754	114.049067277673	105.966304281296	82.8222043662949	114.19702179201	-0.463921467063348	0.00904994359154933	0.265810337315151	Lmod1	1	135252545	135295803	+	3948	protein_coding	leiomodin 1 (smooth muscle) [Source:MGI Symbol;Acc:MGI:2135671]	-	68	80	95	87	94	86	133	115	137	67	100	123	1.62478074658725	1.92018947421343	2.29046736439503	1.60334133182337	1.82298157879742	2.01564727275748	3.21307337635909	2.43469657112887	3.42129068885631	1.57301565324865	2.58111111747588
ENSMUSG00000081094	105.04901981984	78.7187097511162	160.642135134611	59.0462763675172	107.379028201923	77.6261138251189	155.614267936394	101.302091757075	167.650417450932	266.943790449353	165.371147552626	81.8438935505945	98.0768805166879	156.454268116163	-0.673723071307651	0.00905310315599706	0.265810337315151	Rpl19-ps11	8	19542952	19543542	+	591	processed_pseudogene	ribosomal protein L19, pseudogene 11 [Source:MGI Symbol;Acc:MGI:3642193]	-	100	75	151	72	126	75	147	110	154	258	145	95	15.9615666057691	12.0255521005625	24.3201983854193	8.86398260534035	16.3235507867951	11.7426741719492	23.7233491394763	15.5571253867409	25.6909280138714	40.463888076082	25.0014022049111
ENSMUSG00000038146	600.880393369485	574.121789784807	610.652884551437	501.073261952125	657.909601364166	525.787544308805	733.610120271571	916.323466348092	671.690308878086	756.340739606501	624.988888681649	547.923329454506	578.404245888471	708.479475540067	-0.29293318973424	0.00911092714030299	0.265859380867578	Notch3	17	32339794	32385826	-	8089	protein_coding	notch 3 [Source:MGI Symbol;Acc:MGI:99460]	-	572	547	574	611	772	508	693	995	617	731	548	636	6.67058908915001	6.4080181421907	6.75452329512922	5.49579158042301	7.30725116960408	5.81115025556675	8.17117564006157	10.2814032502569	7.52032969855982	8.37641001154646	6.90350380405927
ENSMUSG00000026676	116.604412000022	143.792843145372	155.322859136777	109.071593845553	115.048958787775	90.0462920371379	223.364697514143	258.780798033984	275.425685812246	162.442539149413	67.2889496938272	143.872949715256	121.647826492106	188.529269986478	-0.633643015786295	0.00921242881516983	0.267584320401359	Ccdc3	2	5142587	5235689	+	2670	protein_coding	coiled-coil domain containing 3 [Source:MGI Symbol;Acc:MGI:1921436]	-	111	137	146	133	135	87	211	281	253	157	59	167	3.92170311200396	4.86228652647313	5.20498211147727	3.62430100253624	3.87127548755856	3.015096518847	7.53732671161516	8.79668835581019	9.34234308433798	5.45034227987606	2.25177293938537
ENSMUSG00000070284	51.4740197117216	43.0328946639435	32.9795111865759	36.9039227296982	36.6452239101802	42.435608891065	79.3950346614254	65.3858955886578	54.4319537178351	74.4959415207497	58.1650243116133	32.7375574202378	40.5785301821974	60.7685678700865	-0.581449621230255	0.00926288677311046	0.268227140228082	Gmppb	9	107926441	107930000	+	2785	protein_coding	GDP-mannose pyrophosphorylase B [Source:MGI Symbol;Acc:MGI:2660880]	-	49	41	31	45	43	41	75	71	50	72	51	38	1.65971636386523	1.39505040310583	1.05953215456328	1.17563144518764	1.18215609741764	1.36223453194734	2.56851561598771	2.13087167733976	1.77007373174916	2.39630824796938	1.86607382865901
ENSMUSG00000078853	154.422059135165	189.97448619936	184.046949525085	154.996475464733	195.157122684448	148.007123693227	269.943117848846	234.836667255039	255.830182473825	164.511870858322	212.131265136472	179.195051142354	171.10070278367	219.40802578581	-0.357159381376701	0.00934485725429219	0.269365154766797	Igtp	11	58090382	58098417	+	2022	protein_coding	interferon gamma induced GTPase [Source:MGI Symbol;Acc:MGI:107729]	-	147	181	173	189	229	143	255	255	235	159	186	208	6.8580268150811	8.48259369435722	8.14409064371525	6.80087092698312	8.67133374128266	6.54407268245263	12.0283256022688	10.5410330968833	11.4586449612911	7.28872154099738	9.37379903399521
ENSMUSG00000078580	18.9088235675712	20.991655933631	27.6602351887411	25.4227023249032	20.4531482289378	16.5602376160254	22.2306097051991	24.8650588858276	29.393255007631	43.455965887104	63.867477675497	37.0451307650059	21.6661338099683	36.8095829877108	-0.757426625049438	0.00938702026501223	0.269759316811535	E430018J23Rik	7	126988845	126992801	-	3334	protein_coding	RIKEN cDNA E430018J23 gene [Source:MGI Symbol;Acc:MGI:2141981]	zf-C2H2	18	20	26	31	24	16	21	27	27	42	56	43	0.509295577541006	0.568454412432109	0.742310150665933	0.6765189683415	0.551159397548829	0.444066094660874	0.600758391525859	0.676896574674769	0.798444476657939	1.1676671989143	1.71161576106931
ENSMUSG00000051716	1.0504901981984	3.14874839004465	0	0	0.852214509539075	0	5.29300231076169	3.68371242753002	1.0886390743567	2.06933170890971	28.5122668194183	0	0.841908849630354	6.77449205682941	-3.0238535063623	0.00947433464221245	0.271005411154555	Apon	10	128089965	128091765	+	1801	protein_coding	apolipoprotein N [Source:MGI Symbol;Acc:MGI:88931]	-	1	3	0	0	1	0	5	4	1	2	25	0	0.0523780447751778	0.157847890981287	0	0	0.0425126187170969	0	0.264790523432381	0.185639515492684	0.0547435351795827	0.102932297960928	1.41452341640683
ENSMUSG00000058126	149.169608144173	98.6607828880656	129.79033434717	113.992116876179	79.2559493871339	77.6261138251189	176.786277179441	180.501908948971	153.498109484295	170.719865985051	108.34661391379	113.719936301879	108.08248424464	150.595451968904	-0.480755806446933	0.00948762211402842	0.271005411154555	Tpm3-rs7	14	113552040	113554186	+	2147	protein_coding	tropomyosin 3, related sequence 7 [Source:MGI Symbol;Acc:MGI:99705]	-	142	94	122	139	93	75	167	196	141	165	95	132	6.23906191285213	4.14884348017171	5.40885617074033	4.710495957189	3.31651888532031	3.23238026810525	7.4187472157603	7.63041527839489	6.47490827528571	7.12339923697234	4.50894986362602
ENSMUSG00000032081	0	3.14874839004465	0	1.64017434354214	0	0	12.7032055458281	9.20928106882504	0	0	75.2723844032643	14.6457493722116	0.798153788931132	18.6384367316882	-4.54139282828643	0.00953469961124034	0.271712642751122	Apoc3	9	46144231	46146934	-	1014	protein_coding	apolipoprotein C-III [Source:MGI Symbol;Acc:MGI:88055]	-	0	3	0	2	0	0	12	10	0	0	66	17	0	0.280359025303055	0	0.143507936657795	0	0	1.12872836142418	0.824301694778903	0	0	6.63269192957058
ENSMUSG00000026773	1521.10980699128	1422.1846895035	894.702222835816	1524.54205232242	4013.0781254195	704.845113532079	8208.38798352923	9200.9927158631	3178.82609712157	1443.35886696453	5190.37305180691	1589.49456421944	1680.07700176743	4801.90554658413	-1.51500609378475	0.00954107653551039	0.271712642751122	Pfkfb3	2	11476244	11558888	-	7561	protein_coding	6-phosphofructo-2-kinase/fructose-2,6-biphosphatase 3 [Source:MGI Symbol;Acc:MGI:2181202]	-	1448	1355	841	1859	4709	681	7754	9991	2920	1395	4551	1845	18.0655970520907	16.9820962833681	10.587523921293	17.8889162681058	47.6849161078422	8.33414595363675	97.8121274796751	110.446985951482	38.0758989586842	17.101348415259	61.3354340356542
ENSMUSG00000043017	12.6058823783808	12.5949935601786	15.9578279935045	9.84104606125286	13.6354321526252	20.7002970200317	24.3478106295038	18.4185621376501	15.2409470409938	34.1439731970103	27.3717761466416	29.2914987444233	14.2225798609956	24.8024279827038	-0.811736612267939	0.00956820333924262	0.27175654005095	Ptgir	7	16640415	16644830	+	3334	protein_coding	prostaglandin I receptor (IP) [Source:MGI Symbol;Acc:MGI:99535]	-	12	12	15	12	16	20	23	20	14	33	24	34	0.339530385027337	0.341072647459265	0.428255856153423	0.261878310325742	0.367439598365886	0.555082618326092	0.657973476433083	0.501404870129459	0.414008247155968	0.917452799146947	0.733549611886848
ENSMUSG00000101969	0	0	0	0.820087171771072	0	0	9.52740415937105	4.60464053441252	2.17727814871341	1.03466585445486	0	0.861514668953626	0.136681195295179	3.03425056098424	-3.60264810986652	0.00965113324615236	0.273203529769258	Gm20125	10	16782175	16971555	-	5236	lncRNA	predicted gene, 20125 [Source:MGI Symbol;Acc:MGI:5012310]	-	0	0	0	1	0	0	9	5	2	1	0	1	0	0	0	0.0138958219796604	0	0	0.163941542945587	0.0798168371376822	0.0376597046823638	0.0177025466603926	0
ENSMUSG00000071172	732.191668144285	628.700095212248	668.101065328053	669.191132165195	690.29375272665	643.779237322986	814.063755395148	791.077243812071	825.188418362381	639.423498053102	719.649614522118	870.129815643163	672.042825149903	776.588724297997	-0.209329330369751	0.00972579637589781	0.274496470591286	Srsf3	17	29251602	29262347	+	7899	protein_coding	serine and arginine-rich splicing factor 3 [Source:MGI Symbol;Acc:MGI:98285]	-	697	599	628	816	810	622	769	859	758	618	631	1010	8.32383877353416	7.18597910886278	7.56772211953362	7.516262247192	7.85135248900976	7.28637466507467	9.28539477016384	9.08960891247613	9.46114381550687	7.25189900062516	8.14031275164263
ENSMUSG00000024790	182.785294486522	184.726572215953	190.430080722486	162.377260010672	211.34919836569	221.493178114339	202.192688271097	214.576248903624	240.589235432831	244.181141651346	277.139233484746	229.162901941665	192.193597319277	234.640241614218	-0.287062663970383	0.00979601426909536	0.27524765315746	Sac3d1	19	6166030	6168680	-	1442	protein_coding	SAC3 domain containing 1 [Source:MGI Symbol;Acc:MGI:1913656]	-	174	176	179	198	248	214	191	233	221	236	243	266	11.3827443851432	11.5658791242914	11.8158621992777	9.99042144891082	13.1679446080124	13.7322512549524	12.6332256513215	13.505628780295	15.1103166544471	15.1698794022611	17.1721573238983
ENSMUSG00000025940	943.340197982164	1018.0953127811	1009.59858438905	961.962252487467	818.978143667051	924.268261944416	1080.83107185754	1098.66723151083	1018.96617359787	1018.11120078358	1050.39190962737	1107.04634960541	946.040458875208	1062.33565616377	-0.168777128922501	0.0099809603174449	0.278789714589634	Tmem70	1	16735431	16748499	+	1820	protein_coding	transmembrane protein 70 [Source:MGI Symbol;Acc:MGI:1915068]	-	898	970	949	1173	961	893	1021	1193	936	984	921	1285	46.5444544279151	50.5046758438789	49.6332222773011	46.8932684163153	40.4281222436381	45.4018238022741	53.5057555042256	54.7889785042543	50.7050263843346	50.1140031674696	51.5670262810055
ENSMUSG00000034528	0	0	0	0	0	0	2.11720092430468	1.84185621376501	0	0	9.12392538221386	4.30757334476813	0	2.89842597750861	-4.01376072174325	0.0102175340819701	0.283308434032722	Hsd17b13	5	104103306	104125276	-	2157	protein_coding	hydroxysteroid (17-beta) dehydrogenase 13 [Source:MGI Symbol;Acc:MGI:2140804]	-	0	0	0	0	0	0	2	2	0	0	8	5	0	0	0	0	0	0	0.0884353699956824	0.0775004096899219	0	0	0.377940721067957
ENSMUSG00000018476	486.37696176586	563.625961817992	620.22758134754	605.224332767051	542.860642576391	566.153123497867	799.243348925015	653.858955886578	666.247113506302	696.330120048119	723.071086540448	510.016684020547	564.078100628783	674.794551487835	-0.256876369999572	0.0102516530891041	0.283838897955343	Kdm6b	11	69289334	69304501	-	6954	protein_coding	KDM1 lysine (K)-specific demethylase 6B [Source:MGI Symbol;Acc:MGI:2448492]	-	463	537	583	738	637	547	755	710	612	673	634	592	6.28071808316998	7.31763664749156	7.98015846260419	7.72156897145535	7.01352446924735	7.27856673048647	10.3551981072705	8.5339051213564	8.67687394267447	8.97048167863072	9.29048565228343
ENSMUSG00000037072	1090.40882572994	1095.76443973554	1145.77204993362	1101.37707168855	1233.15439530304	1062.96025197863	1311.60597260675	1264.43429074968	1328.13967071518	1135.02844233698	1229.44894525332	1236.27354994845	1121.57283906155	1250.82181193506	-0.156650772684418	0.0103963903438983	0.286898384633994	Selenof	3	144276065	144303441	+	5819	protein_coding	selenoprotein F [Source:MGI Symbol;Acc:MGI:1927947]	-	1038	1044	1077	1343	1447	1027	1239	1373	1220	1097	1078	1435	16.8272052360232	17.0013490250455	17.6175289144241	16.792352221727	19.0393336432092	16.3310953483044	20.3080907653352	19.7217898970351	20.6708352581685	17.4740532982052	18.8779246842323
ENSMUSG00000036299	234.259314198243	261.346116373706	253.197537496937	210.762403145165	229.245703066011	225.633237518346	295.349528940502	290.092353667989	281.957520258386	282.463778266176	241.784022628667	271.377120720392	235.740718633068	277.170720747019	-0.237057859415303	0.0104093484106862	0.286898384633994	BC031181	18	75138939	75143223	+	1743	protein_coding	cDNA sequence BC031181 [Source:MGI Symbol;Acc:MGI:3039614]	-	223	249	238	257	269	218	279	315	259	273	212	315	12.068977324579	13.5373357932047	12.9974219090033	10.7280210204096	11.816434811964	11.5731700513719	15.2669738868364	15.1055768404664	14.650381340409	14.5177945310796	12.3943089997734
ENSMUSG00000058756	729.04019754969	860.65789327887	909.596195629754	742.17889045282	737.1655507513	818.696747142254	987.674231188132	971.579152761042	890.506762823783	815.316693310427	914.673519566939	913.205549090844	799.555912467448	915.492651456861	-0.196730065725669	0.0104227525941592	0.286898384633994	Thra	11	98631464	98659832	+	4614	protein_coding	thyroid hormone receptor alpha [Source:MGI Symbol;Acc:MGI:98742]	THR-like	694	820	855	905	865	791	933	1055	818	788	802	1060	14.1887741430919	16.8409855771553	17.6386836566286	14.2710151964411	14.3539056692046	15.8632482721485	19.2863569402125	19.1116866931865	17.4792287408311	15.8301129257232	17.712531007411
ENSMUSG00000037458	466.41764800009	488.05600045692	411.711962232415	332.955391739055	381.792100273505	291.874187982447	549.413639857064	609.654406756218	435.455629742681	452.148978396773	469.882157184014	452.295201200654	395.467881780739	494.8083355229	-0.324990445196304	0.0104564648683433	0.286996501745994	Azin1	15	38487671	38519510	-	6256	protein_coding	antizyme inhibitor 1 [Source:MGI Symbol;Acc:MGI:1859169]	-	444	465	387	406	448	282	519	662	400	437	412	525	6.69497909785842	7.04348273767282	5.88832634749364	4.72186072530592	5.48293180732931	4.17105192422292	7.91255541151507	8.84474664403524	6.30390708813481	6.4747064410386	6.71095491850936
ENSMUSG00000033860	2.1009803963968	8.39666237345239	3.19156559870089	0	0	3.10504455300476	34.9338152510272	22.1022745651801	0	1.03466585445486	94.6607258404688	12.0612053653508	2.79904215359247	27.4654478127469	-3.30799341352909	0.0104635565829664	0.286996501745994	Fgg	3	82915031	82922356	+	2093	protein_coding	fibrinogen gamma chain [Source:MGI Symbol;Acc:MGI:95526]	-	2	8	3	0	0	3	33	24	0	1	83	14	0.0901412887148545	0.36220296436668	0.136436218291019	0	0	0.132631064225933	1.50380269270489	0.958442715916837	0	0.0442859695718183	4.04103590740071
ENSMUSG00000086964	1.0504901981984	0	1.06385519956696	0	0	0	1.05860046215234	0	2.17727814871341	8.27732683563886	3.4214720183302	5.16908801372176	0.352390899627561	3.35062757975943	-3.26547928434692	0.0105607584530035	0.287769271342417	Gm15948	5	67146159	67148550	-	403	lncRNA	predicted gene 15948 [Source:MGI Symbol;Acc:MGI:3801731]	-	1	0	1	0	0	0	1	0	2	8	3	6	0.234076572307929	0	0.236196033815635	0	0	0	0.236668849976038	0	0.489295815674583	1.84001060672587	0.758577669364377
ENSMUSG00000070808	133.412255171197	129.098683991831	201.068632718156	191.900398194431	163.625185831502	146.972108842225	260.415713689475	175.897268414558	173.093612822716	258.666463613714	240.643531955891	167.995360445957	161.012877458224	212.785325157052	-0.398246375026851	0.0107367810650937	0.289859095242571	Bicra	7	15704597	15781846	-	7941	protein_coding	BRD4 interacting chromatin remodeling complex associated protein [Source:MGI Symbol;Acc:MGI:2154263]	-	127	123	189	234	192	142	246	191	159	250	211	195	1.50866050211461	1.46778064701539	2.26550098320557	2.1439988149109	1.8512181653976	1.65465088672009	2.95465010060754	2.01039927508638	1.97409696392018	2.91810018617982	2.7076411433934
ENSMUSG00000005089	0	0	0	0	0.852214509539075	0	1.05860046215234	1.84185621376501	0	0	7.98343470943713	9.47666135848989	0.142035751589846	3.39342545730739	-3.76993325527123	0.0107516650693609	0.289859095242571	Slc1a2	2	102489004	102621129	+	13133	protein_coding	solute carrier family 1 (glial high affinity glutamate transporter), member 2 [Source:MGI Symbol;Acc:MGI:101931]	-	0	0	0	0	1	0	1	2	0	0	7	11	0	0	0	0	0.00582998753593935	0	0.007262434062312	0.0127288802026317	0	0	0.0543147695443262
ENSMUSG00000107145	2.1009803963968	1.04958279668155	3.19156559870089	1.64017434354214	0.852214509539075	0	9.52740415937105	1.84185621376501	6.53183444614022	6.20799512672914	10.2644160549906	1.72302933790725	1.47241960747674	6.01608922315054	-2.02467399654931	0.010771761520898	0.289859095242571	Gm43442	6	35903646	35904059	+	414	processed_pseudogene	predicted gene 43442 [Source:MGI Symbol;Acc:MGI:5663579]	-	2	1	3	2	1	0	9	2	6	6	9	2	0.45571429294732	0.228892151092832	0.689760881360151	0.35149045355315	0.184940160167854	0	2.07342492479008	0.403788366427927	1.42888560664389	1.34334107701182	2.2152666721293
ENSMUSG00000032291	0	0	5.31927599783482	0	0	0	3.17580138645702	3.68371242753002	15.2409470409938	1.03466585445486	7.98343470943713	4.30757334476813	0.886545999639136	5.90435579394016	-2.79705368035517	0.0107981378693542	0.289859095242571	Crabp1	9	54672032	54680394	+	802	protein_coding	cellular retinoic acid binding protein I [Source:MGI Symbol;Acc:MGI:88490]	-	0	0	5	0	0	0	3	4	14	1	7	5	0	0	0.593435172242524	0	0	0	0.356773864864128	0.416878762347036	1.72107667832668	0.115574232311491	0.889421282326229
ENSMUSG00000032744	167.027941513546	138.544929161964	155.322859136777	114.81220404795	183.226119550901	126.271811822193	167.258873020069	211.813464582976	223.171010243124	192.447848928603	150.544768806529	186.087168493983	147.534310872222	188.553855679214	-0.355484093775932	0.0108048554311615	0.289859095242571	Heyl	4	123127349	123143668	+	5113	protein_coding	hairy/enhancer-of-split related with YRPW motif-like [Source:MGI Symbol;Acc:MGI:1860511]	bHLH	159	132	146	140	215	122	158	230	205	186	132	216	2.93348807427638	2.44641077115609	2.71803290390071	1.99221461841781	3.21954305819297	2.20788915351947	2.94732101571959	3.7598991053459	3.95298003246193	3.37188331358688	2.63076456741035
ENSMUSG00000053119	616.637746342461	574.121789784807	544.693862178285	612.605117312991	577.801437467493	581.678346262891	695.500503634086	706.351857978881	604.19468626797	642.527495616466	635.25330473664	664.227809763246	584.589716558155	658.009276332882	-0.171021681047229	0.0108291915604458	0.289859095242571	Chmp3	6	71520781	71559593	+	3250	protein_coding	charged multivesicular body protein 3 [Source:MGI Symbol;Acc:MGI:1913950]	-	587	547	512	747	678	562	657	767	555	621	557	771	17.0379655451495	15.9490642314402	14.995613794887	16.7232668746062	15.9726841347185	16.0009652710546	19.2809378698479	19.7258692767371	16.8366690173624	17.7110220950399	17.4644808225529
ENSMUSG00000023915	704.878922991127	675.931321062918	661.717934130651	588.82258933163	573.540364919797	647.919296726992	720.906914725742	870.277061003967	694.551729439576	780.138054258962	801.764942962043	629.767223005101	642.135071527186	749.567654232565	-0.224196853337093	0.0108318456049379	0.289859095242571	Tnfrsf21	17	43327446	43400080	+	4109	protein_coding	tumor necrosis factor receptor superfamily, member 21 [Source:MGI Symbol;Acc:MGI:2151075]	-	671	644	622	718	673	626	681	945	638	754	703	731	15.4045627032134	14.8518641410968	14.4089352670796	12.7137065343856	12.5403741314889	14.0971532171635	15.8072789471827	19.222940204137	15.3084454065898	17.0086792096902	17.4342403609923
ENSMUSG00000093989	3.1514705945952	3.14874839004465	6.38313119740178	2.46026151531322	3.4088580381563	7.2451039570111	13.7618060079804	13.8139216032376	5.44319537178351	6.20799512672914	13.6858880733208	9.47666135848989	4.29959561542037	10.3982445902569	-1.29305835059896	0.0109535545996532	0.291755860771073	Rnasek	11	70128950	70130668	-	885	protein_coding	ribonuclease, RNase K [Source:MGI Symbol;Acc:MGI:106369]	-	3	3	6	3	4	7	13	15	5	6	12	11	0.319772402169814	0.32122491712689	0.645335604255599	0.246639064018651	0.346057520042899	0.731893680592901	1.40102610737228	1.41668121780645	0.557023202589991	0.628410402127564	1.38172565312472
ENSMUSG00000035237	12.6058823783808	11.545410763497	3.19156559870089	8.20087171771072	5.11328705723445	8.28011880801268	23.2892101673514	11.0511372825901	11.9750298179237	13.4506561079131	38.7766828744089	10.3381760274435	8.1561893872561	18.1468153796051	-1.14812802552223	0.0110594185048016	0.294161892758333	Lcat	8	106666183	106670014	-	1342	protein_coding	lecithin cholesterol acyltransferase [Source:MGI Symbol;Acc:MGI:96755]	-	12	11	3	10	6	8	22	12	11	13	34	12	0.843512893950181	0.776732381577316	0.21278763404106	0.542164857567079	0.342318448477607	0.551608181668909	1.56356633672694	0.747399629066296	0.808140220151053	0.897896383069751	2.58172658361418
ENSMUSG00000025347	3.1514705945952	0	6.38313119740178	1.64017434354214	5.11328705723445	1.03501485100159	5.29300231076169	10.1302091757075	3.26591722307011	2.06933170890971	30.7932481649718	12.0612053653508	2.88717967396253	10.6021523247953	-1.86961592181916	0.011101553949777	0.29445550238218	Mettl7b	10	128794143	128796857	-	1230	protein_coding	methyltransferase like 7B [Source:MGI Symbol;Acc:MGI:1918914]	-	3	0	6	2	6	1	5	11	3	2	27	14	0.230080143024622	0	0.464326837208297	0.118306542903255	0.373488908826788	0.0752294898170403	0.387713603822534	0.747500902728771	0.24047099233763	0.150716315957424	2.23687902990617
ENSMUSG00000016356	64.0799020901025	52.4791398340775	63.8313119740178	66.4270609134568	51.1328705723445	76.5910989741173	70.9262309642067	82.8835296194254	102.33207298953	70.3572781029303	86.6772911310317	87.0129815643163	62.4235640596861	83.3648973952401	-0.418683268595897	0.0111317247810545	0.294478348697927	Col20a1	2	180628328	180660156	+	5142	protein_coding	collagen, type XX, alpha 1 [Source:MGI Symbol;Acc:MGI:1920618]	-	61	50	60	81	60	74	67	90	94	68	76	101	1.11907903093073	0.921444482229021	1.11070013567912	1.14613777415902	0.89340987525661	1.33165853036698	1.24276460875204	1.46296718524937	1.80236329146096	1.22577913911697	1.50614007891172
ENSMUSG00000029146	579.870589405517	538.435974697635	578.737228564428	618.345727515388	570.131506881641	514.402380947788	607.636665275442	666.751949382933	686.931255919079	583.55154191254	632.972323391086	690.073249831855	566.653901335399	644.652830952156	-0.185706813175605	0.0111405384910788	0.294478348697927	Snx17	5	31350571	31356487	+	3091	protein_coding	sorting nexin 17 [Source:MGI Symbol;Acc:MGI:2387801]	-	552	513	544	754	669	497	574	724	631	564	555	801	16.8462432770406	15.7271345303778	16.7524195682527	17.748277906719	16.5713802656259	14.8782075121498	17.711650506036	19.5777919442965	20.126900817751	16.9127988848244	18.2969130182663
ENSMUSG00000038692	14.7068627747776	13.6445763568601	6.38313119740178	6.56069737416857	7.66993058585167	14.4902079140222	20.1134087808944	10.1302091757075	17.4182251897072	21.727982943552	21.6693227827579	29.2914987444233	10.575901033847	20.0584412695071	-0.939386292726238	0.0111704981380785	0.294478348697927	Hoxb4	11	96209093	96212464	+	2566	protein_coding	homeobox B4 [Source:MGI Symbol;Acc:MGI:96185]	Homeobox	14	13	6	8	9	14	19	11	16	21	19	34	0.514676547529748	0.480084784560258	0.22257287987771	0.22683873385971	0.268545220882862	0.504852616776864	0.706225013354063	0.358311032874664	0.614766059912259	0.758574131173083	0.754537440156279
ENSMUSG00000006529	0	0	0	0	0	2.07002970200317	13.7618060079804	3.68371242753002	0	0	29.652757492195	4.30757334476813	0.345004950333862	8.56764154541226	-4.61655574667011	0.0111849977267296	0.294478348697927	Itih1	14	30651137	30665246	-	3293	protein_coding	inter-alpha trypsin inhibitor, heavy chain 1 [Source:MGI Symbol;Acc:MGI:96618]	-	0	0	0	0	0	2	13	4	0	0	26	5	0	0	0	0	0	0.0561993759337744	0.376528425455349	0.101529537625971	0	0	0.804573015446901
ENSMUSG00000112041	55.6759805045152	62.974967800893	55.3204703774821	57.406102023975	46.8717980246491	74.5210692721141	85.7466374343394	83.8044577263079	72.9388179818991	110.70924642667	50.1815896021762	87.8744962332699	58.7950646672714	81.8758742341104	-0.484354538290196	0.0111957129085704	0.294478348697927	9530020I12Rik	12	11235994	11254503	-	2284	lncRNA	RIKEN cDNA 9530020I12 gene [Source:MGI Symbol;Acc:MGI:1924692]	-	53	60	52	70	55	72	81	91	67	107	44	102	2.188984898391	2.48935246635112	2.16712963425589	2.22990222065899	1.84373355824082	2.91695429868524	3.38247866452181	3.33019328301351	2.89217957947229	4.34233238685564	1.96309095638779
ENSMUSG00000021228	0	0	0	0	0	0	1.05860046215234	3.68371242753002	0	0	7.98343470943713	4.30757334476813	0	2.83888682398127	-3.987674619825	0.0112693720227259	0.295107394190276	Acot3	12	84098918	84107176	+	3438	protein_coding	acyl-CoA thioesterase 3 [Source:MGI Symbol;Acc:MGI:2159619]	-	0	0	0	0	0	0	1	4	0	0	7	5	0	0	0	0	0	0	0.0277421601338986	0.0972474599774064	0	0	0.20747989192136
ENSMUSG00000023022	185.936765081117	146.941591535417	186.174659924219	104.971157986697	217.314699932464	135.586945481208	233.950702135667	229.311098613744	231.880122837978	214.175831872155	183.618998317054	188.671712500844	162.820969990187	213.60141104624	-0.392354075516307	0.0112994785061335	0.295157964067803	Lima1	15	99676351	99773337	-	7608	protein_coding	LIM domain and actin binding 1 [Source:MGI Symbol;Acc:MGI:1920992]	-	177	140	175	128	255	131	221	249	213	207	161	219	2.19465246836184	1.74376828040754	2.18950122040584	1.22411817262674	2.56626350012097	1.59328702605411	2.77056227463406	2.73560249353242	2.76029597277146	2.52194277115666	2.15644912904701
ENSMUSG00000024331	3.1514705945952	0	6.38313119740178	2.46026151531322	1.70442901907815	0	9.52740415937105	10.1302091757075	4.35455629742681	7.242660981184	11.4049067277673	3.44605867581451	2.28321538773139	7.68429933621187	-1.75427625408559	0.0114873422880681	0.297602309509485	Dsc2	18	20163690	20192611	-	5277	protein_coding	desmocollin 2 [Source:MGI Symbol;Acc:MGI:103221]	-	3	0	6	3	2	0	9	11	4	7	10	4	0.053628685980725	0	0.108228540793293	0.0413635724192735	0.0290184674282704	0	0.162667788300756	0.174232728890731	0.0747342102394758	0.122955038885107	0.193106437214228
ENSMUSG00000034928	472.72058918928	481.758503676831	519.161337388678	423.985067805644	466.161336717874	453.336504738694	624.57427266988	584.78934787039	555.205927921918	505.951602828425	497.253933330655	491.924875972521	469.520556586167	543.283326765632	-0.211647429671149	0.011565694100041	0.299222834517182	Rnf44	13	54827212	54841720	-	5202	protein_coding	ring finger protein 44 [Source:MGI Symbol;Acc:MGI:2145310]	-	450	459	488	517	547	438	590	635	510	489	436	571	8.16028188928159	8.36129563697934	8.92949957599346	7.23109512664447	8.05097631512722	7.79106792465058	10.8175225795468	10.2029915080967	9.66599086847338	8.71312404449364	8.54082821534512
ENSMUSG00000048878	388.681373333408	384.147303585447	435.116776622888	318.193822647176	445.708188488936	444.02137107968	555.765242629978	558.082432770798	451.785215858032	465.599634504686	455.055778437916	416.111585104602	402.644805959589	483.733314884335	-0.26568138515941	0.011658458504791	0.299762240918083	Hexim1	11	103007057	103010551	+	3495	protein_coding	hexamethylene bis-acetamide inducible 1 [Source:MGI Symbol;Acc:MGI:2385923]	-	370	366	409	388	523	429	525	606	415	450	399	483	9.98659733815028	9.92350623810882	11.1391941818969	8.07734113521453	11.4574001029654	11.3580385956388	14.3270992657168	14.492709659929	11.7070498844772	11.9344035597188	11.6334776824782
ENSMUSG00000021067	570.416177621732	564.675544614674	634.05769894191	586.362327816316	667.283960969095	587.8884353689	746.313325817399	728.454132544061	751.160961306125	616.660849255095	744.740409323206	592.722092240095	601.780690888771	696.675295080997	-0.209469225874848	0.0116942667461184	0.300089462924107	Sav1	12	70011786	70033776	-	5265	protein_coding	salvador family WW domain containing 1 [Source:MGI Symbol;Acc:MGI:1927144]	-	543	538	596	715	783	568	705	791	690	596	653	688	9.72891590533176	9.68311616281267	10.7752047426609	9.88078719432743	11.3866233998731	9.98258893936886	12.771352385744	12.5574730776466	12.9210339472584	10.4926036944035	12.6385907497474
ENSMUSG00000050394	8.40392158558721	12.5949935601786	11.7024071952366	9.84104606125286	10.2265741144689	4.14005940400634	13.7618060079804	19.3394902445326	21.7727814871341	10.3466585445486	23.9503041283114	18.9533227169798	9.48483365345508	18.0207271882478	-0.922688690771976	0.011776509538057	0.301383158961788	Armcx6	X	133649210	133652166	-	2486	protein_coding	armadillo repeat containing, X-linked 6 [Source:MGI Symbol;Acc:MGI:2147993]	-	8	12	11	12	12	4	13	21	20	10	21	22	0.303565112277056	0.457416012320672	0.421181423131419	0.351207677645223	0.369582749683788	0.148885394167272	0.498756277161893	0.70606115400732	0.79318670038961	0.37285009780296	0.860799519419512
ENSMUSG00000095438	75.6352942702849	97.6112000913841	86.1722711649241	60.6864507110593	57.9505866486571	71.4160247191094	111.153048525996	70.9114642299528	128.459410774091	83.8079342108434	147.123296788198	91.3205549090844	74.9119712675698	105.462618239694	-0.493771855912445	0.0118779565222707	0.301600003920764	Mir133a-1hg	18	10781718	10787714	-	685	lncRNA	Mir133a-1, Mir1b and Mir1a-2 host gene [Source:MGI Symbol;Acc:MGI:5433911]	-	72	93	81	74	68	69	105	77	118	81	129	106	9.91527857238957	12.8654096370456	11.2556892435675	7.86004491609803	7.60063560444587	9.32076905222221	14.6199158930453	9.39559528831346	16.9839220573643	10.9604865392979	19.1903539159347
ENSMUSG00000001288	193.290196468506	162.68533348564	131.918044746303	117.272465563263	161.920756812424	136.621960332209	237.126503522124	193.394902445326	220.993732094411	192.447848928603	171.07360091651	149.042037728977	150.618126234724	194.013104272658	-0.365399470195044	0.011880536641931	0.301600003920764	Rarg	15	102143373	102165952	-	4261	protein_coding	retinoic acid receptor, gamma [Source:MGI Symbol;Acc:MGI:97858]	THR-like	184	155	124	143	190	132	224	210	203	186	150	173	4.07351466551925	3.4470803416163	2.7700512090671	2.44179040498164	3.41407955850819	2.86652428225643	5.01398038606828	4.11938049486552	4.69711351613729	4.04610170907527	3.58726590886932
ENSMUSG00000097509	2.1009803963968	0	1.06385519956696	0.820087171771072	1.70442901907815	0	0	6.44649674817753	3.26591722307011	4.13866341781943	5.70245336388366	10.3381760274435	0.948225297802164	4.98195113006571	-2.39026646865452	0.0119114794986352	0.30166937338057	B230322F03Rik	7	35254792	35256360	+	1569	lncRNA	RIKEN cDNA B230322F03 gene [Source:MGI Symbol;Acc:MGI:3704291]	-	2	0	1	1	2	0	0	7	3	4	5	12	0.120245836379981	0	0.0606673050527092	0.0463725454974519	0.0975974841421178	0	0	0.372905890984108	0.188514544662387	0.236304740124451	0.324736350917616
ENSMUSG00000032076	80.8877452612769	98.6607828880656	113.832506353665	126.293424452745	144.024252112104	113.851633610174	140.793861466261	134.455503604846	185.068642640639	105.535917154395	161.949675534296	176.610507135493	112.925057446338	150.735684589322	-0.412214692150747	0.0119155362638519	0.30166937338057	Cadm1	9	47441471	47769413	+	11798	protein_coding	cell adhesion molecule 1 [Source:MGI Symbol;Acc:MGI:1889272]	-	77	94	107	154	169	110	133	146	170	102	142	205	0.615666224384415	0.755006522455387	0.863282689791828	0.94972136619489	1.09675565742533	0.862735207005048	1.07520034665754	1.03435260299922	1.4206499547324	0.801359086286592	1.22648939670695
ENSMUSG00000055782	818.331864396554	879.550383619138	854.275725252272	864.37187904671	933.174887945287	749.350752125148	1061.7762635388	1226.6762383675	935.140964872408	843.252671380709	1011.61522675296	899.421314387586	849.842582064185	996.313779883326	-0.229088896399001	0.0119310571687637	0.30166937338057	Abcd2	15	91030074	91076002	-	5946	protein_coding	ATP-binding cassette, sub-family D (ALD), member 2 [Source:MGI Symbol;Acc:MGI:1349467]	-	779	838	803	1054	1095	724	1003	1332	859	815	887	1044	12.3587784864841	13.3551987492328	12.8548877072055	12.8973232720012	14.100054290093	11.2669635506005	16.0887452371282	18.7242084670322	14.2434374018483	12.7048075119004	15.2013640693273
ENSMUSG00000048337	4.2019607927936	0	0	0	2.55664352861722	0	10.5860046215234	4.60464053441252	5.44319537178351	3.10399756336457	5.70245336388366	3.44605867581451	1.12643405356847	5.48105835513036	-2.27494834766255	0.0120579630055724	0.303411633025521	Npy4r	14	33865949	33874446	-	3627	protein_coding	neuropeptide Y receptor Y4 [Source:MGI Symbol;Acc:MGI:105374]	-	4	0	0	0	3	0	10	5	5	3	5	4	0.104034032136857	0	0	0	0.0633293848713742	0	0.262965388862265	0.115224968087374	0.135915504354051	0.076667108613578	0.140477346178588
ENSMUSG00000020792	1054.69215899119	1428.48218628359	1437.26837461497	1233.41110634369	1381.43971996284	1435.5655983392	1586.84209276636	1821.59579541359	1527.36062132245	1259.18834487156	1705.03355580121	1518.85036136524	1328.47652408925	1569.81179525674	-0.240988604178274	0.0120862937625077	0.303411633025521	Exoc7	11	116178827	116198059	-	4367	protein_coding	exocyst complex component 7 [Source:MGI Symbol;Acc:MGI:1859270]	-	1004	1361	1351	1504	1621	1387	1499	1978	1403	1217	1495	1763	21.687700955955	29.5329054503917	29.4475931300718	25.0581222632917	28.4204790125225	29.3891142484014	32.7389380041161	37.8588347791273	31.6753214844001	25.8310923425495	34.8852505249215
ENSMUSG00000023176	0	1.04958279668155	2.12771039913393	0	0	0	9.52740415937105	1.84185621376501	2.17727814871341	0	11.4049067277673	1.72302933790725	0.529548865969246	4.44574576458734	-3.14874669201124	0.0120941035289685	0.303411633025521	Cpn2	16	30075196	30086317	-	4550	protein_coding	carboxypeptidase N, polypeptide 2 [Source:MGI Symbol;Acc:MGI:1919006]	-	0	1	2	0	0	0	9	2	2	0	10	2	0	0.0208266704510841	0.0418404402759124	0	0	0	0.188658883266613	0.0367403041101454	0.0433376293883202	0	0.223961026193292
ENSMUSG00000041120	251.067157369418	224.610718489852	275.538496687844	206.66196728631	219.871343461081	193.547777137296	348.279552048119	304.827203378109	326.591722307011	323.85041244437	249.767457338104	193.840800514566	228.549576738633	291.192858005047	-0.349270816597353	0.012096091611272	0.303411633025521	Nbl1	4	138809595	138820304	-	2033	protein_coding	NBL1, DAN family BMP antagonist [Source:MGI Symbol;Acc:MGI:104591]	-	239	214	259	252	258	187	329	331	300	313	219	225	11.0897949901538	9.97487900551922	12.1266273593578	9.01876439702239	9.71659045147506	8.5113305227828	15.4349300598982	13.6086411719342	14.548909029773	14.2706036597267	10.9771748426122
ENSMUSG00000041559	1365.63725765792	2442.37916787796	2289.41638946811	1320.34034655143	1280.87840783723	1042.2599549586	5284.53350706447	5400.32241875901	6174.76082975122	2466.64339702038	761.847769414857	1851.39502358134	1623.48525405854	3656.58382426521	-1.17144900472348	0.0121122468480092	0.303414987840738	Fmod	1	133964992	133976015	+	3306	protein_coding	fibromodulin [Source:MGI Symbol;Acc:MGI:1328364]	-	1300	2327	2152	1610	1503	1007	4992	5864	5672	2384	668	2149	37.0939855511566	66.6998374880552	61.9608068671543	35.4329169557345	34.8086918158396	28.1851174780049	144.018364285963	148.257017849911	169.153085934969	66.8403611022797	20.5900527226828
ENSMUSG00000039376	3694.57402706378	4653.85012048599	4499.04363896869	3726.47610852775	3448.91212010463	4592.36089389403	4772.17088338274	4754.75181583437	4668.08435084154	4719.1109621686	4582.49152321691	4661.65587370807	4102.53615150748	4693.04423485871	-0.194376361647923	0.0121774697533433	0.304162632045955	Synpo2l	14	20709014	20718422	-	4629	protein_coding	synaptopodin 2-like [Source:MGI Symbol;Acc:MGI:1916010]	-	3517	4434	4229	4544	4047	4437	4508	5163	4288	4561	4018	5411	71.6717787507485	90.7694595699905	86.9617260495888	71.4224956871292	66.9387493788101	88.6942521001071	92.8844199187445	93.2264382209006	91.3301452168808	91.3289105649846	88.451784073518
ENSMUSG00000028255	0	0	0	0	0	0	0	8.28835296194254	0	3.10399756336457	2.28098134555346	2.58454400686088	0	2.70964597962024	-3.93063954526974	0.0121995299810834	0.304162632045955	Clca1	3	144709578	144738537	-	3777	protein_coding	chloride channel accessory 1 [Source:MGI Symbol;Acc:MGI:1346342]	-	0	0	0	0	0	0	0	9	0	3	2	3	0	0	0	0	0	0	0	0.199168050477953	0	0.0736223465558505	0.0539593682382568
ENSMUSG00000030868	195.391176864903	153.239088315506	209.579474314692	159.096911323588	163.625185831502	160.427301905246	210.661491968315	221.943673758684	183.980003566283	216.245163581065	206.428811772589	217.963211245267	173.559856425906	209.537059315367	-0.275970559547439	0.0122203173062429	0.304162632045955	Dctn5	7	121732264	121748267	+	2649	protein_coding	dynactin 5 [Source:MGI Symbol;Acc:MGI:1891689]	-	186	146	197	194	192	155	199	241	169	209	181	253	6.62359822840986	5.22278489265955	7.07883704064064	5.32848381796429	5.54946147656563	5.41430812896139	7.16501765252108	7.60429982483578	6.29000945982424	7.31306971369856	6.96274454969746
ENSMUSG00000041479	36.767156936944	13.6445763568601	15.9578279935045	12.3013075765661	19.6009337193987	21.7353118710333	42.3440184860935	39.5999085959477	25.0386987102042	22.7626487980069	29.652757492195	43.0757334476813	20.0011857423845	33.7456275883548	-0.767349816625048	0.0122444319449781	0.304162632045955	Syt15	14	33941552	33952377	+	5164	protein_coding	synaptotagmin XV [Source:MGI Symbol;Acc:MGI:2442166]	-	35	13	15	15	23	21	40	43	23	22	26	50	0.639359034160211	0.238554910375992	0.276492065146304	0.211343504702272	0.341014756994249	0.376293129739379	0.738788121923652	0.695995400769747	0.439124991817168	0.394886087316798	0.513063311360698
ENSMUSG00000032402	1074.65147275696	1253.20185923777	1021.30099158429	1165.34387108669	1111.28772043895	1199.58221231084	1200.45292408075	1547.15921956261	1837.62275751411	1162.96442040726	1394.82009280594	1122.55361364658	1137.56135456925	1377.59550466954	-0.27582285266201	0.0122478518077348	0.304162632045955	Smad3	9	63554049	63665276	-	5542	protein_coding	SMAD family member 3 [Source:MGI Symbol;Acc:MGI:1201674]	MH1	1023	1194	960	1421	1304	1159	1134	1680	1688	1124	1223	1303	17.4129401639873	20.41592431606	16.4885459333441	18.6556951355645	18.0153473669392	19.3512998553732	19.5160840448844	25.3376835635106	30.0298023054903	18.7990185075296	22.4876348683959
ENSMUSG00000028883	34.6661765405472	38.8345634772173	22.3409591909062	34.443661214385	42.6107254769537	38.2955494870587	63.5160277291403	82.8835296194254	62.0524272383321	23.7973146524617	49.0410989293995	50.829365468264	35.1986058978447	55.3532939395038	-0.652349780528276	0.0122545193922834	0.304162632045955	Sema3a	5	13175381	13652533	+	13868	protein_coding	sema domain, immunoglobulin domain (Ig), short basic domain, secreted, (semaphorin) 3A [Source:MGI Symbol;Acc:MGI:107558]	-	33	37	21	42	50	37	60	90	57	23	43	59	0.224472478736886	0.252824485898472	0.144139532317689	0.220353187423643	0.276049993905002	0.246877277298349	0.412651629104457	0.542441395049919	0.40523558486663	0.153726729825336	0.315964629180254
ENSMUSG00000038403	10161.3916871731	11404.7666687417	10871.5362843748	10451.1909170505	11832.9984649501	10662.7229950183	12642.8653194854	12543.9617438466	12596.6427293814	10251.4692859387	13763.4414390696	11866.5030501672	10897.4345028848	12277.4805946482	-0.171950083640709	0.0125078623386577	0.307602727835816	Hjv	3	96432488	96436526	+	2028	protein_coding	hemojuvelin BMP co-receptor [Source:MGI Symbol;Acc:MGI:1916835]	-	9673	10866	10219	12744	13885	10302	11943	13621	11571	9908	12068	13774	449.941687192131	507.730194823832	479.642983053981	457.216286191734	524.21507263673	470.052993608005	561.683450853709	561.390669229172	562.534930699643	452.849020700832	606.388834894377
ENSMUSG00000033533	0	0	0	0	0	0	2.11720092430468	5.52556864129503	0	0	31.9337388377485	4.30757334476813	0	7.31401362468606	-5.35061073641129	0.0125207822363743	0.307602727835816	Acsm1	7	119206249	119261738	+	2181	protein_coding	acyl-CoA synthetase medium-chain family member 1 [Source:MGI Symbol;Acc:MGI:2152200]	-	0	0	0	0	0	0	2	6	0	0	28	5	0	0	0	0	0	0	0.0874622159929789	0.229942756122643	0	0	1.30823634741061
ENSMUSG00000053199	392.883334126202	457.618099353155	347.880650258397	414.964108916162	347.703519891942	312.574485002479	496.483616749447	573.7382105878	492.06486160923	416.970339345307	440.229399691819	367.866763643198	378.937366258056	464.558865271134	-0.293531330888254	0.0125248829421564	0.307602727835816	Arhgap20	9	51676637	51765156	+	12685	protein_coding	Rho GTPase activating protein 20 [Source:MGI Symbol;Acc:MGI:2445175]	-	374	436	327	506	408	302	469	623	452	403	386	427	2.78127624212815	3.25707125272847	2.45377607664629	2.90231084635901	2.46264188681691	2.20297566317996	3.52637519333237	4.10508092415545	3.51313238470711	2.94476037276056	3.10084943084966
ENSMUSG00000032204	2.1009803963968	0	4.25542079826785	0.820087171771072	4.26107254769537	0	13.7618060079804	0	3.26591722307011	1.03466585445486	37.6361922016322	6.89211735162901	1.90626015235518	10.4317831064611	-2.43732382450262	0.0126357602282347	0.307602727835816	Aqp9	9	71017941	71075964	-	4143	protein_coding	aquaporin 9 [Source:MGI Symbol;Acc:MGI:1891066]	-	2	0	4	1	5	0	13	0	3	1	33	8	0.0455384304321	0	0.0919015222087384	0.0175617967379923	0.0924031213003759	0	0.299277843356134	0	0.0713925466027722	0.0223728057721013	0.811676275233474
ENSMUSG00000009633	125.00833358561	126.999518398467	180.855383926384	155.816562636504	95.4480250683764	91.0813068881395	160.907270247155	181.422837055853	145.877635963798	199.690509909787	169.933110243733	165.410816439096	129.20152175058	170.540363309904	-0.401598039083811	0.0126481235451467	0.307602727835816	G0s2	1	192954469	192955525	-	871	protein_coding	G0/G1 switch gene 2 [Source:MGI Symbol;Acc:MGI:1316737]	-	119	121	170	190	112	88	152	197	134	193	149	192	12.8881861976709	13.1643208000509	18.5784044508716	15.8715494124516	9.84535631074976	9.348840387826	16.6445316580163	18.9048057342875	15.1681702859121	20.5387751120166	17.4321903223585
ENSMUSG00000113735	1.0504901981984	4.1983311867262	1.06385519956696	0	4.26107254769537	1.03501485100159	6.35160277291403	4.60464053441252	2.17727814871341	14.485321962368	12.5453974005441	3.44605867581451	1.93479399719809	7.26838324912775	-1.90032286611227	0.0127105677566664	0.307816793063618	Gm48607	12	16235774	16256473	+	1989	lncRNA	predicted gene, 48607 [Source:MGI Symbol;Acc:MGI:6098192]	-	1	4	1	0	5	1	6	5	2	14	11	4	0.0474272793565084	0.190570840728874	0.0478567127338868	0	0.192471659903196	0.0465220072775061	0.28771507251989	0.210116118276975	0.0991383678817783	0.652422061535154	0.563562059375278
ENSMUSG00000017817	15721.6363062373	19664.9832786255	18948.3249594872	16575.6019158369	17943.3764983452	19783.2738620443	20917.9451321302	19987.8236317779	20189.9002730194	18535.0041167043	23206.7042096609	20041.4157438682	18106.1994700961	20479.7988511935	-0.177722256275235	0.0128469863669991	0.309202997093101	Jph2	2	163178162	163239913	-	4255	protein_coding	junctophilin 2 [Source:MGI Symbol;Acc:MGI:1891496]	-	14966	18736	17811	20212	21055	19114	19760	21704	18546	17914	20348	23263	331.794491752683	417.261730658138	398.443169445588	345.615813107818	378.867412443324	415.666711183637	442.928394744345	426.348131592246	429.731553418664	390.236952220375	487.310770210671
ENSMUSG00000052135	210.09803963968	251.899871203572	126.598768748469	208.302141629852	183.226119550901	140.762019736216	321.814540494311	252.334301285806	258.007460622539	174.858529402871	322.758860395815	197.28685919038	186.814493418115	254.51009189862	-0.443891591764052	0.0130123554954461	0.311934162497161	Foxo6	4	120124276	120144546	-	2615	protein_coding	forkhead box O6 [Source:MGI Symbol;Acc:MGI:2676586]	Fork_head	200	240	119	254	215	136	304	274	237	169	283	229	7.21475018279887	8.69702643693454	4.33164558076344	7.06717593381167	6.2950377271666	4.81238587250268	11.0878677431221	8.75796121111248	8.93558941699715	5.99032516215483	11.0280464771622
ENSMUSG00000024304	4.2019607927936	6.2974967800893	3.19156559870089	21.3222664660479	15.3398611717033	13.4551930630206	31.7580138645702	20.2604183514151	17.4182251897072	21.727982943552	15.9668694188743	24.9839253996552	10.6347239787259	22.019239194629	-1.02417337397591	0.0130622604643634	0.312734625378146	Cdh2	18	16721934	16942303	-	8066	protein_coding	cadherin 2 [Source:MGI Symbol;Acc:MGI:88355]	-	4	6	3	26	18	13	30	22	16	21	14	29	0.0467804902752766	0.0704894747476563	0.035403050444223	0.234530327426612	0.170862146487831	0.149134582466461	0.354739201117072	0.227975727834463	0.195572738623215	0.241321748151516	0.176869791327953
ENSMUSG00000001630	217.451471027069	247.701540016846	207.451763915558	212.402577488708	232.654561104167	234.94837117736	245.595307219342	281.804000706046	225.348288391837	250.389136778075	303.370518958611	307.560736816445	225.435047454951	269.011331478393	-0.257010483201899	0.013164963554212	0.314002619382452	Stk38l	6	146626493	146680310	+	4880	protein_coding	serine/threonine kinase 38 like [Source:MGI Symbol;Acc:MGI:1922250]	-	207	236	195	259	273	227	232	306	207	242	266	357	4.00141429067617	4.58272105130616	3.80357895848395	3.86156919802152	4.28325958657606	4.30426759258521	4.53434237650813	5.2411398988274	4.1821256392817	4.59653879179168	5.5545088115111
ENSMUSG00000111415	1.0504901981984	1.04958279668155	1.06385519956696	1.64017434354214	3.4088580381563	2.07002970200317	6.35160277291403	11.0511372825901	16.3295861153505	3.10399756336457	0	4.30757334476813	1.71383171302475	6.85731617983122	-1.97806778283019	0.0132368046568497	0.314527737253978	Gm39325	9	43978063	43982765	-	920	lncRNA	predicted gene, 39325 [Source:MGI Symbol;Acc:MGI:5622210]	-	1	1	1	2	4	2	6	12	15	3	0	5	0.102535715913147	0.103001467991775	0.103464132204023	0.158170704098917	0.332892288302137	0.201157114075999	0.622027477437023	1.0902285893554	1.60749630747438	0.30225174232766	0
ENSMUSG00000103857	0	1.04958279668155	0	1.64017434354214	0	1.03501485100159	3.17580138645702	4.60464053441252	2.17727814871341	1.03466585445486	7.98343470943713	4.30757334476813	0.62079533187088	3.88056566304051	-2.60517784057666	0.0133951505658421	0.315912031651206	Gm37249	9	99189636	99192504	+	2869	TEC	predicted gene, 37249 [Source:MGI Symbol;Acc:MGI:5610477]	-	0	1	0	2	0	1	3	5	2	1	7	5	0	0.0330294006805272	0	0.0507204767413747	0	0.0322524477082466	0.0997325338518754	0.145667814309134	0.068729945526963	0.0323076104265653	0.248628744658639
ENSMUSG00000031467	467.468138198288	526.890563934138	413.839672631549	496.152738921498	414.17625163599	429.531163165658	483.780411203619	473.357046937607	582.421904780836	543.1995735888	587.352696480017	534.139094751248	458.009754747854	534.041787957021	-0.220509620991398	0.0134889534406095	0.317049648210488	Agpat5	8	18896293	18941377	+	10783	protein_coding	1-acylglycerol-3-phosphate O-acyltransferase 5 (lysophosphatidic acid acyltransferase, epsilon) [Source:MGI Symbol;Acc:MGI:1196345]	-	445	502	389	605	486	415	457	514	535	525	515	620	3.89299101315426	4.41159213366606	3.4338999938028	4.08225048230814	3.45086710436918	3.56124390958993	4.04224601399768	3.98425991015474	4.89171030040427	4.51289349112059	4.8668893130616
ENSMUSG00000043822	591.4259815857	554.179716647858	582.992649362696	624.086337717786	372.417740668576	460.581608695705	675.387094853192	698.063505016938	557.383206070632	701.503449320393	618.145944644989	622.875105653472	530.947339113053	645.559717593269	-0.282780505981749	0.0135209235797317	0.317297708491894	Adamtsl5	10	80174944	80184246	-	4722	protein_coding	ADAMTS-like 5 [Source:MGI Symbol;Acc:MGI:1913798]	-	563	528	548	761	437	445	638	758	512	678	542	723	11.2472256277792	10.5959324632961	11.0466914214274	11.7258019222505	7.08576956739681	8.72021627517091	12.8866740137101	13.4173692127785	10.6903156949418	13.3088060704716	11.6965329668631
ENSMUSG00000022203	17.8583333693728	7.34707957677084	22.3409591909062	19.6820921225057	17.0442901907815	5.17507425500793	48.6956212590076	46.0464053441252	20.6841424127774	25.8666463613714	23.9503041283114	12.0612053653508	14.9079714508908	29.550720811824	-0.980551898191951	0.0136910990309947	0.320496951111222	Efs	14	55153992	55163583	-	2917	protein_coding	embryonal Fyn-associated substrate [Source:MGI Symbol;Acc:MGI:105311]	-	17	7	21	24	20	5	46	50	19	25	21	14	0.549762974590887	0.227401252611254	0.68526809536569	0.598630295938309	0.524958699413723	0.158608626114089	1.50406826906267	1.43270812222456	0.642190274360693	0.794399505603495	0.733612480382896
ENSMUSG00000084696	1.0504901981984	0	0	0	0.852214509539075	0	3.17580138645702	1.84185621376501	1.0886390743567	4.13866341781943	4.56196269110693	1.72302933790725	0.317117451289579	2.75499202023539	-2.97252202242624	0.0137364188443598	0.321002398402877	Gm24892	2	180825305	180825408	+	104	snRNA	predicted gene, 24892 [Source:MGI Symbol;Acc:MGI:5454669]	-	1	0	0	0	1	0	3	2	1	4	4	2	0.907046717693223	0	0	0	0.736204099129725	0	2.75127538097145	1.60738830481886	0.948010642869505	3.56502055053138	3.91931795838261
ENSMUSG00000020810	164.926961117149	144.842425942054	240.431275102134	183.69952647672	194.304908174909	212.178044455325	253.005510454409	304.827203378109	206.841424127774	293.845102665179	210.990774463695	193.840800514566	190.063856878048	243.891802600622	-0.360414910525619	0.0137804915989829	0.321002398402877	Cygb	11	116536421	116545139	-	2331	protein_coding	cytoglobin [Source:MGI Symbol;Acc:MGI:2149481]	-	157	138	226	224	228	205	239	331	190	284	185	225	6.35360738159371	5.6100670854722	9.22876978458189	6.99181010311131	7.48900540478938	8.13775884056916	9.77916500349296	11.8688835274741	8.03633217636268	11.2930552317133	8.08748150142444
ENSMUSG00000032372	29.4137255495552	17.8429075435863	29.787945587875	20.5021792942768	17.0442901907815	20.7002970200317	35.9924157131795	35.9161961684177	25.0386987102042	26.9013122158263	46.760117583846	38.7681601029132	22.5485575310178	34.8961500823978	-0.638159124480808	0.0139599590612483	0.324733975041247	Plscr2	9	92157655	92179805	+	3180	protein_coding	phospholipid scramblase 2 [Source:MGI Symbol;Acc:MGI:1270860]	-	28	17	28	25	20	20	34	39	23	26	41	45	0.830603786768134	0.506585836286589	0.838124542633843	0.572000973942626	0.48154230383328	0.581963977829934	1.01975993156342	1.02508914533731	0.713094798032659	0.757847135899123	1.31383425900499
ENSMUSG00000021619	155.472549333363	101.80953127811	130.854189546737	126.293424452745	92.0391670302201	94.1863514411443	174.669076255136	163.004274918203	123.016215402307	159.338541586048	157.387712843189	130.088715011998	116.775868847053	151.250756002814	-0.374204594762304	0.0140035296326204	0.324998583557066	Atg10	13	91083475	91372087	-	1718	protein_coding	autophagy related 10 [Source:MGI Symbol;Acc:MGI:1914045]	-	148	97	123	154	108	91	165	177	113	154	138	151	8.1264627932096	5.35032072385679	6.81490174633714	6.52200970801357	4.81318069931611	4.90130197626387	9.16024166423555	8.61140975410524	6.48487839057184	8.30869748796719	8.18539745906683
ENSMUSG00000000579	34.6661765405472	38.8345634772173	36.1710767852768	40.1842714167825	26.4186497957113	34.1554900830523	51.8714226454646	43.2836210234777	50.0773974204083	43.455965887104	57.0245336388366	49.1063361303567	35.0717046830979	49.1365461242747	-0.485285062499114	0.0140490119388055	0.325655064990329	Dynlt1c	17	6869070	6877173	+	3777	protein_coding	dynein light chain Tctex-type 1C [Source:MGI Symbol;Acc:MGI:3807476]	-	33	37	34	49	31	33	49	47	46	42	50	57	0.824194952375732	0.9282949352502	0.856859426884254	0.94391518940683	0.628414618902365	0.808463063720854	1.23735763316834	1.04009981916264	1.20076328183418	1.03071285178191	1.34898420595642
ENSMUSG00000044086	1400.30343419847	1692.97705104734	1287.26479147603	1434.3324634276	914.426168735427	1153.00654401577	1695.87794036805	1768.18196521441	1544.77884651216	1682.3666793436	1543.08388026692	1366.36226496045	1313.71840881677	1600.10859611093	-0.284823012201558	0.0141446171770845	0.327095159939705	Lmod3	6	97215495	97229720	-	2215	protein_coding	leiomodin 3 (fetal) [Source:MGI Symbol;Acc:MGI:2444169]	-	1333	1613	1210	1749	1073	1114	1602	1920	1419	1626	1353	1586	56.7700679761837	69.0067983932613	51.9983169162609	57.4513129913061	37.0900622257717	46.5376756375192	68.981864360104	72.4522114461016	63.161904574316	68.042803067388	62.2454930654553
ENSMUSG00000038745	0	1.04958279668155	0	0	0	0	2.11720092430468	1.84185621376501	0	0	20.5288321099812	0	0.174930466113592	4.08131487467514	-4.01847569295619	0.0141549635824389	0.327095159939705	Nlrp6	7	140500815	140509105	+	5081	protein_coding	NLR family, pyrin domain containing 6 [Source:MGI Symbol;Acc:MGI:2141990]	-	0	1	0	0	0	0	2	2	0	0	18	0	0	0.018650137876881	0	0	0	0	0.0375428248535105	0.0329006856329781	0	0	0.360999961527861
ENSMUSG00000024339	88.2411766486657	95.512034498021	91.4915471627589	81.1886300053361	102.265741144689	104.53649995116	119.621852223214	110.511372825901	103.420712063887	102.431919591031	134.577899387654	139.565376370487	93.8726049017718	118.354855410362	-0.336768782285046	0.0142822738427067	0.32851433716058	Tap2	17	34422501	34435295	+	3781	protein_coding	transporter 2, ATP-binding cassette, sub-family B (MDR/TAP) [Source:MGI Symbol;Acc:MGI:98484]	-	84	91	86	99	120	101	113	120	95	99	118	162	2.0957313212822	2.2806884158348	2.16505742924683	1.90507639901209	2.42999924811927	2.47176924622346	2.85047943905285	2.65276461837337	2.47721374016152	2.42696717721972	3.18023472528904
ENSMUSG00000029862	3388.88137938804	3786.89473042703	3701.15223929347	4026.62801339596	3966.20632739485	4064.50331988322	4420.71552994816	4700.4170575283	4273.99700592442	3733.07440287312	4410.27743162762	4124.07072028101	3822.3776682971	4277.09202469711	-0.161957596787821	0.0143111378264589	0.32851433716058	Clcn1	6	42263619	42292690	+	5428	protein_coding	chloride channel, voltage-sensitive 1 [Source:MGI Symbol;Acc:MGI:88417]	-	3226	3608	3479	4910	4654	3927	4176	5104	3926	3608	3867	4787	56.0644439891207	62.9880163583598	61.0087654131855	65.8150980614987	65.6474877016163	66.9444056759702	73.3781566603674	78.5950101704798	71.3110791315752	61.6115415998982	72.5969171281696
ENSMUSG00000040936	3.1514705945952	0	0	0	0	1.03501485100159	6.35160277291403	1.84185621376501	0	7.242660981184	5.70245336388366	6.03060268267538	0.697747574266131	4.52819600240368	-2.76274043667626	0.0144542983157985	0.329801809041677	Ulk4	9	120784417	121106263	-	8503	protein_coding	unc-51-like kinase 4 [Source:MGI Symbol;Acc:MGI:1921622]	-	3	0	0	0	0	1	6	2	0	7	5	7	0.0332822034482283	0	0	0	0	0.0108823088880348	0.0673015734731343	0.0196599298719466	0	0.0763064495115501	0.0599213612360037
ENSMUSG00000116056	77.7362746666817	64.0245505975745	96.8108231605937	41.0043585885536	102.265741144689	53.8207722520824	116.446050836757	95.7765231157805	80.559291502396	87.9465976286629	124.313483332664	116.30448030874	72.6104200683625	103.5577377875	-0.513678888207175	0.0145268258014983	0.330262937609574	Gm4544	15	102565546	102568906	+	1487	lncRNA	predicted gene 4544 [Source:MGI Symbol;Acc:MGI:3782728]	-	74	61	91	50	120	52	110	104	74	85	109	135	4.69443950192807	3.88731834814955	5.82516284338989	2.44648701699738	6.17876742242029	3.23582929972959	7.05550108906374	5.84583453427062	4.90644916444096	5.29838292984152	7.46963489849114
ENSMUSG00000097767	11.5553921801824	8.39666237345239	17.0216831930714	8.20087171771072	17.8965047003206	6.21008910600951	14.8204064701327	26.7069150995926	34.8364503794145	24.8319805069166	18.2478507644277	12.0612053653508	11.5468672117912	21.9174680976392	-0.918188515357646	0.0146282724924835	0.331772723907369	Miat	5	112361094	112377261	-	10436	lncRNA	myocardial infarction associated transcript (non-protein coding) [Source:MGI Symbol;Acc:MGI:2444886]	-	11	8	16	10	21	6	14	29	32	24	16	14	0.0994309548716987	0.0726418938692469	0.145936376585206	0.0697187848653718	0.154069543167815	0.0531998500239323	0.127949947447759	0.232267301999506	0.302316924058041	0.213163359863126	0.156231915550706
ENSMUSG00000025129	762.655883892039	353.709402481682	343.625229460129	392.821755278343	696.259254293424	270.138876111414	962.267820096476	784.630747063894	693.46309036522	709.780776156032	767.550222778741	538.446668096017	469.868400252839	742.689887426063	-0.660090745784958	0.0146756424728604	0.33207952900949	Ppp1r27	11	120440805	120441958	-	771	protein_coding	protein phosphatase 1, regulatory subunit 27 [Source:MGI Symbol;Acc:MGI:1915951]	-	726	337	323	479	817	261	909	852	637	686	673	625	88.8270497700507	41.4196824074835	39.8773041838487	45.2027664606426	81.1333202267893	31.3241544954143	112.449014014491	92.3654104496691	81.4575993110492	82.4717335139788	88.9497089958223
ENSMUSG00000031543	4486.64363650537	5507.16093418809	5676.73134488932	4435.85151210973	5191.69079211204	6251.48970004957	5496.25359949494	5390.1922095833	6568.84817466834	6312.49637802908	6475.70604002629	6384.68521161532	5258.26131997569	6104.69693556955	-0.215435778872903	0.0146769167182761	0.33207952900949	Ank1	8	23464860	23640513	+	13527	protein_coding	ankyrin 1, erythroid [Source:MGI Symbol;Acc:MGI:88024]	-	4271	5247	5336	5409	6092	6040	5192	5853	6034	6101	5678	7411	29.7845523214199	36.7570641198058	37.5484468607534	29.0937277812287	34.4818037020346	41.316990149239	36.6082813363986	36.1660586162083	43.9795081528615	41.8056442558283	42.7737910519781
ENSMUSG00000004270	216.400980828871	231.957798066622	220.218026310361	197.641008396828	213.053627384769	211.143029604323	240.302304908581	302.064419057461	258.007460622539	271.082453867173	198.445377063151	270.515606051439	215.069078431962	256.736270261724	-0.260095781960156	0.0146944051805868	0.33207952900949	Lpcat3	6	124639990	124681381	+	3268	protein_coding	lysophosphatidylcholine acyltransferase 3 [Source:MGI Symbol;Acc:MGI:1315211]	-	206	221	207	241	250	204	227	328	237	262	174	314	5.94631850668899	6.40827982622019	6.02928682280724	5.36560717760281	5.85719295513245	5.77618836746994	6.62506213728824	8.38911105477066	7.15011209469019	7.43112606799869	5.42564089465206
ENSMUSG00000021650	345.611275207274	341.114408921503	317.028849470955	348.537048002705	366.452239101802	341.554900830523	391.682170996365	380.343308142474	404.973735660693	393.173024692846	398.03124479908	370.451307650059	343.383120255794	389.77579865692	-0.179960948014216	0.0147863993060533	0.332790730000773	Ptcd2	13	99456155	99481213	-	1704	protein_coding	pentatricopeptide repeat domain 2 [Source:MGI Symbol;Acc:MGI:1916177]	-	329	325	298	425	430	330	370	413	372	380	349	430	18.2133277538681	18.0736143952703	16.646553101558	18.1469323071234	19.3210371555642	17.9199823455027	20.7099132746051	20.2583751374941	21.5238472719104	20.6704243188087	20.8708281422323
ENSMUSG00000071342	345.611275207274	467.064344523289	308.518007874419	256.687284764345	381.792100273505	259.788727601398	484.839011665771	460.464053441252	539.964980880925	315.573085608731	490.410989293995	342.882838243543	336.576956707372	439.022493189036	-0.383035162615635	0.0147946067673698	0.332790730000773	Lsmem1	12	40225492	40249489	-	2281	protein_coding	leucine-rich single-pass membrane protein 1 [Source:MGI Symbol;Acc:MGI:2685735]	-	329	445	290	313	448	251	458	500	496	305	430	398	13.6060984184969	18.4869798315793	12.1018108163232	9.98396228678743	15.0377998187866	10.1822009606378	19.1507743601391	18.3218307432224	21.4389219648314	12.3939557061437	19.209984557088
ENSMUSG00000070704	0	0	0	0	0	0	6.35160277291403	8.28835296194254	1.0886390743567	0	23.9503041283114	0	0	6.61314982292078	-5.2050869469934	0.0148137387998021	0.332790730000773	Ugt2b36	5	87213786	87240414	-	2059	protein_coding	UDP glucuronosyltransferase 2 family, polypeptide B36 [Source:MGI Symbol;Acc:MGI:3576103]	-	0	0	0	0	0	0	6	9	1	0	21	0	0	0	0	0	0	0	0.277933598466275	0.365351008574661	0.0478839761332824	0	1.03931403850263
ENSMUSG00000019797	396.034804720797	420.882701469301	396.817989438477	378.880273358235	372.417740668576	366.395257254561	414.971381163717	386.789804890652	497.508056981013	431.455661307675	486.989517275665	468.663979910773	388.571461151658	447.729733588249	-0.204267974954425	0.0148928327411548	0.333204552982092	Mtres1	10	43401129	43416990	-	4141	protein_coding	mitochondrial transcription rescue factor 1 [Source:MGI Symbol;Acc:MGI:1915101]	-	377	401	373	462	437	354	392	420	457	417	427	544	8.58813999210719	9.17635874704792	8.57395595439082	8.11746873583722	8.07993332461912	7.91026912729671	9.02873659594654	8.47750798774304	10.8807171780492	9.33396590409591	10.5076715706264
ENSMUSG00000020439	1375.09166944171	1350.81305932915	1352.15995864961	1168.62421977378	1160.71616199222	1090.90565295567	1523.32606503721	1392.44329760635	1472.92866760462	1195.03906189536	1535.10044555748	1483.52825993814	1249.71845369036	1433.72763293986	-0.198678092878733	0.0149251379502796	0.333204552982092	Smtn	11	3467523	3490612	-	4380	protein_coding	smoothelin [Source:MGI Symbol;Acc:MGI:1354727]	-	1309	1287	1271	1425	1362	1054	1439	1512	1353	1155	1346	1722	28.192171680339	27.8442598541052	27.6216162257552	23.6714375654887	23.8086388661021	22.2668984448875	31.3352259067475	28.8537210223923	30.45581588572	24.4423669252185	31.3151715231867
ENSMUSG00000086053	0	0	0	0	0	1.03501485100159	0	0	2.17727814871341	13.4506561079131	6.84294403666039	0	0.172502475166931	3.74514638221449	-3.89877500207412	0.0149377265541132	0.333204552982092	Gm15178	1	75368775	75373007	-	472	lncRNA	predicted gene 15178 [Source:MGI Symbol;Acc:MGI:3705132]	-	0	0	0	0	0	1	0	0	2	13	6	0	0	0	0	0	0	0.196042950158813	0	0	0.417767401942494	2.55291725864323	1.29536779980442
ENSMUSG00000046794	11.5553921801824	27.2891527137203	7.44698639696875	11.481220404795	11.078788624008	14.4902079140222	29.6408129402655	10.1302091757075	18.5068642640639	27.9359780702811	47.9006082566228	25.8454400686088	13.8902913722828	26.6599854625916	-0.939564459272187	0.014957939782281	0.333262898349222	Ppp1r3b	8	35842893	35855293	+	6216	protein_coding	protein phosphatase 1, regulatory subunit 3B [Source:MGI Symbol;Acc:MGI:2177268]	-	11	26	7	14	13	14	28	11	17	27	42	30	0.16693395190493	0.396363435386623	0.107192569400564	0.163870549291671	0.160126760299773	0.208406019087747	0.429628588019565	0.147912823416407	0.269640092759537	0.402613324722173	0.688528830526675
ENSMUSG00000049929	9.45441178378561	12.5949935601786	8.51084159653571	8.20087171771072	5.11328705723445	5.17507425500793	16.9376073944374	22.1022745651801	10.886390743567	12.4159902534583	11.4049067277673	19.8148373859334	8.17491332840883	15.5936678450573	-0.952265967528982	0.0149840021502297	0.333451272292655	Lpar4	X	105964231	105977506	+	4238	protein_coding	lysophosphatidic acid receptor 4 [Source:MGI Symbol;Acc:MGI:1925384]	-	9	12	8	10	6	5	16	24	10	12	10	23	0.200329336423043	0.268319067161206	0.179682872350544	0.171681273915767	0.108398149565113	0.109169741003964	0.360085121435936	0.473341341296352	0.232640648556934	0.262455500652617	0.240448954502001
ENSMUSG00000030272	386.580392937011	463.915596133245	395.75413423891	409.223498713765	483.205626908655	444.02137107968	489.07341351438	489.933752861492	470.292080122096	460.426305232411	564.542883024483	501.401537331011	430.450103335211	495.944995347645	-0.203015480642881	0.0150319665254209	0.334126035279837	Camk1	6	113311085	113320945	-	5975	protein_coding	calcium/calmodulin-dependent protein kinase I [Source:MGI Symbol;Acc:MGI:1098535]	-	368	442	372	499	567	429	462	532	432	445	495	582	5.80995681666193	7.00996099484104	5.92628696326438	6.07640224583523	7.26568758451576	6.6437397308381	7.3747994145002	7.44214059657054	7.12840538290228	6.90331176061055	8.44211248943669
ENSMUSG00000067825	105.04901981984	92.3632861079763	80.8529951670892	55.7659276804329	107.379028201923	79.6961435271221	107.977247139539	91.1718825813679	94.7115994690331	146.92255133259	127.734955350994	135.257803025719	86.8510667507307	117.296006483207	-0.435893603679449	0.0151173547601023	0.334847275916854	Pex26	6	121160626	121175796	+	5667	protein_coding	peroxisomal biogenesis factor 26 [Source:MGI Symbol;Acc:MGI:1921293]	-	100	88	76	68	126	77	102	99	87	142	112	157	1.66459958779063	1.47150147319818	1.27655057767871	0.873050930688925	1.7023501879294	1.25727633325779	1.71669485567585	1.46017910591274	1.51360513440679	2.32257911991562	2.01394986673905
ENSMUSG00000078497	1.0504901981984	0	0	0	0.852214509539075	0	5.29300231076169	0	1.0886390743567	0	2.28098134555346	13.784234703258	0.317117451289579	3.74114290565498	-3.43726145945457	0.0151461224941399	0.334847275916854	Zfp978	4	147445760	147475461	+	1287	protein_coding	zinc finger protein 978 [Source:MGI Symbol;Acc:MGI:3701123]	zf-C2H2	1	0	0	0	1	0	5	0	1	0	2	16	0.0732967044600584	0	0	0	0.0594912403337152	0	0.370542138851373	0	0.0766069206359196	0	0.158356281146772
ENSMUSG00000018541	213.249510234275	206.767810946265	152.131293538076	183.69952647672	197.713766213065	176.987539521271	266.767316462389	209.971608369211	259.096099696895	206.933170890971	214.412246482026	214.517152569453	188.424907821612	228.616265745158	-0.277127085202226	0.015191683689933	0.334847275916854	Cwc25	11	97636307	97657382	-	5053	protein_coding	CWC25 spliceosome-associated protein [Source:MGI Symbol;Acc:MGI:1914730]	-	203	197	143	224	232	171	252	228	238	200	188	249	3.78974278724309	3.69443618817123	2.69379402983598	3.22539270737234	3.51536364611162	3.1314107645395	4.75660829767792	3.77146165484513	4.64380752667841	3.66873280482152	3.79133706324445
ENSMUSG00000040731	1588.34117967598	1626.8533348564	1501.09968658899	1492.55865262335	1588.52784578083	1647.74364279452	1796.44498427252	1722.13555987028	1832.17956214233	1572.69209877138	1643.44705947127	1854.84108225716	1574.18739038668	1736.95672446416	-0.142585320049771	0.0152176772081829	0.334847275916854	Eif4h	5	134648575	134668344	-	5551	protein_coding	eukaryotic translation initiation factor 4H [Source:MGI Symbol;Acc:MGI:1341822]	-	1512	1550	1411	1820	1864	1592	1697	1870	1683	1520	1441	2153	25.694700461867	26.4601140976888	24.1954349300461	23.8552537329515	25.7102471340105	26.5378090038075	29.157934872809	28.1575281499885	29.8923074838291	25.3809425611602	26.4531015364372
ENSMUSG00000029723	572.517158018128	574.121789784807	543.630006978718	588.002502159858	497.69327357082	452.301489887693	817.239556781605	642.807818603988	611.815159788467	522.506256499703	702.542254430467	569.461196178347	538.044370066671	644.395373713763	-0.259337760807667	0.0152412267314567	0.334847275916854	Tsc22d4	5	137743992	137766712	+	7509	protein_coding	TSC22 domain family, member 4 [Source:MGI Symbol;Acc:MGI:1926079]	TSC22	545	547	511	717	584	437	772	698	562	505	616	661	6.8466384283995	6.9029775938448	6.47763454944135	6.94737802981821	5.95473327536863	5.38508497423856	9.80576187630113	7.76957862720807	7.37905527426246	6.23368222512678	8.35954140650632
ENSMUSG00000011257	5182.06814771271	5638.35878377328	5367.14948181533	4731.08289394731	5444.79850144515	5196.80956687896	5662.45387205286	6004.45125687393	6174.76082975122	5162.98261372974	6187.16189981377	5745.44132725173	5260.04456259546	5822.87529991221	-0.146738569123847	0.015352672792288	0.336514950625406	Pabpc4	4	123156144	123192718	+	4027	protein_coding	poly(A) binding protein, cytoplasmic 4 [Source:MGI Symbol;Acc:MGI:2385206]	-	4933	5372	5045	5769	6389	5021	5349	6520	5672	4990	5425	6669	115.555994951972	126.411218069945	119.249670526881	104.232412290902	121.473859173415	115.372371516457	126.688476892053	135.3287635624	138.867668761114	114.856162459881	137.278320841785
ENSMUSG00000031924	1300.50686536962	1501.9529820513	1376.62862823965	1416.29054564864	1193.95252786424	1358.97449936508	1617.54150616877	1636.48924593021	1354.26700849974	1398.86823522297	1619.49675534296	1581.74093219886	1358.05100808976	1534.73394722725	-0.177025451538113	0.0154134716601871	0.337262130977895	Cyb5b	8	107877272	107914103	+	4374	protein_coding	cytochrome b5 type B [Source:MGI Symbol;Acc:MGI:1913677]	-	1238	1431	1294	1727	1401	1313	1528	1777	1244	1352	1420	1836	26.699606537823	31.0021702424625	28.160032031606	28.7274738798038	24.523978522999	27.7766057978102	33.3189051471525	33.9572722721724	28.040654991286	28.6505721061452	33.0821259770201
ENSMUSG00000030609	482.175000973066	536.336809104272	509.586640592576	525.675877105257	515.58977827114	503.01721758677	531.417432000474	555.31964845015	580.244626632123	619.764846818459	546.295032260055	617.70601763975	512.063553938847	575.124600633502	-0.168005855257282	0.0154223785736011	0.337262130977895	Aen	7	78545602	78560957	+	5801	protein_coding	apoptosis enhancing nuclease [Source:MGI Symbol;Acc:MGI:1915298]	-	459	511	479	641	605	486	502	603	533	599	479	717	7.46402036128317	8.34736254650802	7.85977827610217	8.03968519403668	7.98516840497196	7.75222968847274	8.25366805089681	8.68837574313053	9.05880468118296	9.57104465677912	8.41427096254044
ENSMUSG00000025212	301.490686882941	354.758985278364	267.027655091308	270.628766684454	397.984175954748	252.543623644387	425.55738578524	529.53366145744	415.86012640426	274.186451430537	465.320194492907	295.499531451094	307.4056489227	400.992891836913	-0.382286738330263	0.0154895347235505	0.338340032981083	Sfxn3	19	45035942	45044822	+	3110	protein_coding	sideroflexin 3 [Source:MGI Symbol;Acc:MGI:2137679]	-	287	338	251	330	467	244	402	575	382	265	408	343	8.70531525070975	10.2988220214541	7.68229498667296	7.72035783994073	11.4970934683384	7.25976671507721	12.3285446010347	15.453668911281	12.1101501028681	7.89806803638623	13.3685289075636
ENSMUSG00000006542	3355.26569304569	3307.23539234356	2845.81265884163	2674.30426714547	4319.87534885357	3043.97867679566	5125.74343774162	4665.42178946677	4181.4626846041	2673.57656791135	5673.94109706424	3925.06083175272	3257.74533950426	4374.20106809013	-0.425052392698346	0.0155748203905648	0.33896012971921	Prkag3	1	74778081	74788380	-	3682	protein_coding	protein kinase, AMP-activated, gamma 3 non-catalytic subunit [Source:MGI Symbol;Acc:MGI:1891343]	-	3194	3151	2675	3261	5069	2941	4842	5066	3841	2584	4975	4556	81.8302961695992	81.095332860053	69.1540546860672	64.4393118931619	105.40715159229	73.9102154668268	125.425877335237	115.002041258838	102.850658186644	65.049522180038	137.687066245734
ENSMUSG00000030255	1451.77745391019	1474.66382933758	1357.47923464745	1400.70888938499	1457.28681131182	1235.80773209589	1519.09166318861	1816.0702267723	1480.54914112512	1472.32951088926	1686.78570503679	1477.49765725547	1396.28732511465	1575.38731737792	-0.173992001710195	0.0156011404176693	0.33896012971921	Sspn	6	145877367	145910949	+	4996	protein_coding	sarcospan [Source:MGI Symbol;Acc:MGI:1353511]	-	1382	1405	1276	1708	1710	1194	1435	1972	1360	1423	1479	1715	26.0944777102905	26.6492589123634	24.3111717527915	24.87421112819	26.2062724157787	22.1143981855688	27.3952720747384	32.991998864961	26.8387961023744	26.4008467431065	30.1668240135398
ENSMUSG00000032902	672.313726846976	477.560172490105	480.862550204268	642.94834266852	384.348743802123	484.386950268742	625.632873132032	684.249583413701	520.369477542504	777.034056695598	609.022019262775	684.904161818133	523.736747713456	650.202028644124	-0.312571183360959	0.0156031253130419	0.33896012971921	Slc16a1	3	104545984	104565778	+	4426	protein_coding	solute carrier family 16 (monocarboxylic acid transporters), member 1 [Source:MGI Symbol;Acc:MGI:106013]	-	640	455	452	784	451	468	591	743	478	751	534	795	13.6405398846952	9.74162098991342	9.72085963301418	12.8880891835141	7.80183395065085	9.78425294131972	12.7356823328836	14.0314176558928	10.6478773335583	15.7276527947753	12.2945798766797
ENSMUSG00000037016	22.0602941621664	9.44624517013394	20.2132487917723	39.3641842450114	17.8965047003206	16.5602376160254	35.9924157131795	43.2836210234777	20.6841424127774	46.5599634504686	25.0907948010881	44.7987627855886	20.9234524475717	36.06828336443	-0.778697801091699	0.0156630111211395	0.33896012971921	Frem2	3	53421359	53564776	-	13255	protein_coding	Fras1 related extracellular matrix protein 2 [Source:MGI Symbol;Acc:MGI:2444465]	-	21	9	19	48	21	16	34	47	19	45	22	52	0.149452284529762	0.064341920405273	0.136443080416923	0.263478622897329	0.121302885892065	0.111694934711381	0.244650062796807	0.296375482231407	0.141325464376472	0.314679294162332	0.16913239322481
ENSMUSG00000015217	65.1303922883009	34.6362322904911	31.9156559870089	46.7449687909511	44.3151544960319	42.435608891065	70.9262309642067	56.1766145198328	44.6342020486248	75.5306073752046	60.4460056571668	68.0596588473365	44.1963354573081	62.6288865687287	-0.50272755759336	0.0157033114517687	0.33896012971921	Hmgb3	X	70599524	70604282	+	2234	protein_coding	high mobility group box 3 [Source:MGI Symbol;Acc:MGI:1098219]	HMG	62	33	30	57	52	41	67	61	41	73	53	79	2.61801129618886	1.39978718363038	1.27824979804433	1.85641712689061	1.78218073773212	1.69821986189496	2.86047252381514	2.28228992967119	1.80945272211082	3.02883124660186	2.41755601909187
ENSMUSG00000014349	468.518628396487	443.973522996295	458.521591013361	534.696835994739	409.062964578756	444.02137107968	506.011020908818	598.603269473628	543.230898103995	482.154288175963	493.832461312325	558.26150548195	459.79915234322	530.34890724278	-0.206522675820072	0.0157082176294433	0.33896012971921	Ube2z	11	95938258	95956214	-	3997	protein_coding	ubiquitin-conjugating enzyme E2Z [Source:MGI Symbol;Acc:MGI:1343160]	-	446	423	431	652	480	429	478	650	499	466	433	648	10.526008244554	10.0285342215859	10.2640974985086	11.868540798936	9.19472319953863	9.93153487409498	11.4061714401512	13.5926256449531	12.3087216218053	10.8065521616808	11.0391997937132
ENSMUSG00000021796	1158.69068861284	1404.34178195991	1219.17805870374	1354.78400776581	1320.08027527603	1117.81603908171	1724.46015284616	1734.10762525976	1364.06476016895	1249.87635218147	1586.42252583243	1259.5344460102	1262.48180856667	1486.41097704983	-0.235059542741695	0.0158072900581636	0.33896012971921	Bmpr1a	14	34132691	34225298	-	6351	protein_coding	bone morphogenetic protein receptor, type 1A [Source:MGI Symbol;Acc:MGI:1338938]	-	1103	1338	1146	1652	1549	1080	1629	1883	1253	1208	1391	1462	16.3831118060187	19.9638934087789	17.175925659793	18.9256938212643	18.6741514018898	15.7352943273431	24.4638676293843	24.7817718870483	19.4516080764621	17.6303204930073	22.3186983597647
ENSMUSG00000021368	214.300000432474	279.189023917292	250.005971898236	301.792079211754	257.3687818808	238.053415730365	312.28713633494	270.752863423456	305.907579894233	290.741105101815	329.601804432476	313.59133949912	256.784878845154	303.81363811434	-0.239016809248289	0.015880658824912	0.33896012971921	Tbc1d7	13	43305216	43324977	-	4042	protein_coding	TBC1 domain family, member 7 [Source:MGI Symbol;Acc:MGI:1914296]	-	204	266	235	368	302	230	295	294	281	281	289	364	4.76098544348823	6.23615023427686	5.53412800161051	6.62422978472656	5.72060820026383	5.2653198093124	6.96100352038628	6.07960227710805	6.85419669154339	6.44384961459234	7.28593645207495
ENSMUSG00000029445	1.0504901981984	11.545410763497	0	0	0	8.28011880801268	34.9338152510272	22.1022745651801	2.17727814871341	1.03466585445486	160.809184861519	8.61514668953626	3.47933662828469	38.2787275617385	-3.46748711244428	0.0158959882061143	0.33896012971921	Hpd	5	123309870	123320790	-	2128	protein_coding	4-hydroxyphenylpyruvic acid dioxygenase [Source:MGI Symbol;Acc:MGI:96213]	-	1	11	0	0	0	8	33	24	2	1	141	10	0.0443293508647064	0.489837808306747	0	0	0	0.347865685996089	1.4790690957854	0.942678855457678	0.0926626944158162	0.0435575819143871	6.75198291138659
ENSMUSG00000038776	323.550981045107	285.486520697381	296.815600679183	295.231381837586	290.605147752824	302.224336492463	365.217159442557	361.924746004824	301.553023596807	402.485017382939	329.601804432476	321.344971519703	298.985661417424	347.021120396551	-0.215677217805267	0.0158967142808323	0.33896012971921	Ephx1	1	180803775	180848469	-	1950	protein_coding	epoxide hydrolase 1, microsomal [Source:MGI Symbol;Acc:MGI:95405]	-	308	272	279	360	341	292	345	393	277	389	289	373	14.8997540826407	13.2179935129547	13.6190633098095	13.4323428711696	13.3890985495059	13.8561146475324	16.8744890032915	16.8454294345017	14.0052772306588	18.4905732554227	15.1024385329677
ENSMUSG00000045725	7.35343138738881	4.1983311867262	1.06385519956696	1.64017434354214	12.7832176430861	6.21008910600951	7.41020323506637	13.8139216032376	13.0636688922804	7.242660981184	17.107360091651	22.3993813927943	5.54151647771996	13.5061993660356	-1.28028902702932	0.0159084479526339	0.33896012971921	Prr15	6	54302820	54307186	+	3157	protein_coding	proline rich 15 [Source:MGI Symbol;Acc:MGI:1925254]	-	7	4	1	2	15	6	7	15	12	7	15	26	0.20916376638602	0.120065062467447	0.0301510933252141	0.0460934582739956	0.36378789820791	0.175861145026847	0.211480147539564	0.397137433563102	0.374759988058645	0.205522249032851	0.484172950196142
ENSMUSG00000040564	9.45441178378561	10.4958279668155	12.7662623948036	4.10043585885536	3.4088580381563	4.14005940400634	22.2306097051991	12.8929934963551	6.53183444614022	1.03466585445486	148.263787460975	12.0612053653508	7.39430924107044	33.8358493880792	-2.19698285101611	0.0159087817439935	0.33896012971921	Apoc1	7	19423406	19426585	-	744	protein_coding	apolipoprotein C-I [Source:MGI Symbol;Acc:MGI:88053]	-	9	10	12	5	4	4	21	14	6	1	130	14	1.14112329000115	1.27367406656495	1.53527421980163	0.488968574499341	0.411641001663933	0.497485335886879	2.69210816847744	1.57282081439265	0.795105700471197	0.124584051497064	17.8055036281361
ENSMUSG00000022676	17.8583333693728	18.8924903402679	15.9578279935045	6.56069737416857	10.2265741144689	4.14005940400634	15.8790069322851	34.0743399546527	39.1910066768413	22.7626487980069	17.107360091651	13.784234703258	12.2726637659648	23.7997661927825	-0.966869975005298	0.0159116884211838	0.33896012971921	Snai2	16	14523716	14527249	+	2021	protein_coding	snail family zinc finger 2 [Source:MGI Symbol;Acc:MGI:1096393]	zf-C2H2	17	18	15	8	12	4	15	37	36	22	15	16	0.793497573914705	0.843990257270552	0.706484425737512	0.288009990640285	0.454617870219643	0.183141558584779	0.70789866309013	1.53024002893196	1.75623545121397	1.00900136313901	0.756325583260376
ENSMUSG00000039515	807.82696241457	839.666237345239	801.082965273924	722.496798330314	817.273714647972	920.128202540409	900.86899329164	931.979244165094	1018.96617359787	822.559354291611	914.673519566939	951.973709193757	818.079146758738	923.503499017819	-0.175924736641711	0.0160969865221291	0.34213774495632	Ptpa	2	30306051	30337818	+	5188	protein_coding	protein phosphatase 2 protein activator [Source:MGI Symbol;Acc:MGI:1346006]	-	769	800	753	881	959	889	851	1012	936	795	802	1105	13.9826461631136	14.6123902162579	13.815692410497	12.3554856482512	14.1530555186589	15.8560505455357	15.6450061884796	16.3043951720871	17.7878080222608	14.2037345372944	15.7528176692741
ENSMUSG00000028715	1.0504901981984	1.04958279668155	0	0	0	0	2.11720092430468	0	0	0	78.6938564215945	10.3381760274435	0.350012165813325	15.1915388955571	-5.44424380945702	0.0162077043150714	0.343719489718726	Cyp4a14	4	115343397	115353339	-	2601	protein_coding	cytochrome P450, family 4, subfamily a, polypeptide 14 [Source:MGI Symbol;Acc:MGI:1096550]	-	1	1	0	0	0	0	2	0	0	0	69	12	0.0362679195079182	0.0364326607275788	0	0	0	0	0.0733391361325209	0	0	0	2.70328966448997
ENSMUSG00000097354	234.259314198243	217.263638913081	221.281881509928	153.35630112119	270.151999523887	230.808311773353	288.997926167588	235.757595361921	295.021189150666	220.383826998885	364.957015288554	276.546208734114	221.186907839947	280.277293616955	-0.340908621784855	0.0162306449203263	0.343735326850159	2310001H17Rik	6	129185375	129215688	-	7757	lncRNA	RIKEN cDNA 2310001H17 gene [Source:MGI Symbol;Acc:MGI:1923682]	-	223	207	208	187	317	223	273	256	271	213	320	321	2.71190247218528	2.52876106282758	2.55239091640605	1.75400850413676	3.12893860256656	2.66013881164316	3.35671911892662	2.75848306223394	3.44446718559161	2.54519579848431	4.20378050970006
ENSMUSG00000027690	0	0	0	0	0	0	6.35160277291403	1.84185621376501	0	2.06933170890971	36.4957015288554	0	0	7.79308203740736	-5.44153078584219	0.0163331607215054	0.344280217405353	Slc2a2	3	28752052	28785508	+	5755	protein_coding	solute carrier family 2 (facilitated glucose transporter), member 2 [Source:MGI Symbol;Acc:MGI:1095438]	-	0	0	0	0	0	0	6	2	0	2	32	0	0	0	0	0	0	0	0.0994379286259011	0.0290475036839551	0	0.0322121752611002	0.566615558883464
ENSMUSG00000083284	0	0	1.06385519956696	0	0	0	3.17580138645702	0	6.53183444614022	5.17332927227429	2.28098134555346	0	0.177309199927827	2.86032440840416	-3.50451749100269	0.016343220796674	0.344280217405353	Gm13688	2	80433077	80433684	+	608	processed_pseudogene	predicted gene 13688 [Source:MGI Symbol;Acc:MGI:3652062]	-	0	0	1	0	0	0	3	0	6	5	2	0	0	0	0.156557568466613	0	0	0	0.470612894113537	0	0.97295829136607	0.762257683501774	0.335204825387987
ENSMUSG00000049225	1022.12696284704	1348.71389373579	1117.04795954531	1385.12723312134	1041.40613065675	1179.91693014181	1605.8969010851	1534.26622606625	1281.32819051784	1160.89508869835	1464.39002384532	1308.64078214056	1182.38985167467	1392.56953539224	-0.235752876742083	0.0163989804631034	0.345070991122502	Pdp1	4	11958184	11966452	-	4507	protein_coding	pyruvate dehydrogenase phosphatase catalytic subunit 1 [Source:MGI Symbol;Acc:MGI:2685870]	-	973	1285	1050	1689	1222	1140	1517	1666	1177	1122	1284	1519	20.3651811530536	27.0176027201855	22.1758046836223	27.2662850771273	20.7594201353891	23.4051010919578	32.1028928559355	30.896663772591	25.7475231356491	23.0749455291993	29.0309542317828
ENSMUSG00000032419	14.7068627747776	11.545410763497	7.44698639696875	7.38078454593965	6.8177160763126	2.07002970200317	16.9376073944374	27.6278432064751	23.9500596358475	21.727982943552	7.98343470943713	7.75363202058264	8.3279650432498	17.663426651722	-1.09138163701827	0.0164284570713363	0.345307569386201	Tbx18	9	87584853	87613313	-	4718	protein_coding	T-box18 [Source:MGI Symbol;Acc:MGI:1923615]	T-box	14	11	7	9	8	2	16	30	22	21	7	9	0.279919461840045	0.220935747366841	0.141227005382345	0.138793284224145	0.129826581279341	0.0392252108838319	0.323450772497985	0.531480660347059	0.459738946775207	0.412569143830041	0.151190306999923
ENSMUSG00000045775	1.0504901981984	0	0	3.28034868708429	0.852214509539075	0	7.41020323506637	1.84185621376501	0	4.13866341781943	17.107360091651	2.58454400686088	0.863842232470294	5.51377116086045	-2.5809200978082	0.0164816419668816	0.345841736285892	Slc16a5	11	115353300	115365224	+	3699	protein_coding	solute carrier family 16 (monocarboxylic acid transporters), member 5 [Source:MGI Symbol;Acc:MGI:2443515]	-	1	0	0	4	1	0	7	2	0	4	15	3	0.0255022597026481	0	0	0.0786791282892695	0.0206988987049179	0	0.180492788803029	0.0451928585296463	0	0.100233073061709	0.413228981824606
ENSMUSG00000020583	1.0504901981984	1.04958279668155	1.06385519956696	0.820087171771072	0	0	7.41020323506637	7.36742485506003	10.886390743567	0	0	1.72302933790725	0.664002561036331	4.56450802860011	-2.80417275181935	0.0165811940998992	0.346538956784707	Matn3	12	8997929	9022028	+	3014	protein_coding	matrilin 3 [Source:MGI Symbol;Acc:MGI:1328350]	-	1	1	1	1	0	0	7	8	10	0	0	2	0.0312982278168863	0.0314403950074428	0.0315816196508629	0.0241401870887532	0	0	0.221513877167354	0.221855850963718	0.327117142861408	0	0
ENSMUSG00000020639	11.5553921801824	19.9420731369494	4.25542079826785	4.10043585885536	2.55664352861722	4.14005940400634	14.8204064701327	12.8929934963551	22.8614205614908	12.4159902534583	18.2478507644277	18.9533227169798	7.75833748447977	16.6986640438074	-1.1267379761999	0.0166051409782081	0.346538956784707	Pfn4	12	4819022	4828813	+	4780	protein_coding	profilin family, member 4 [Source:MGI Symbol;Acc:MGI:1920121]	-	11	19	4	5	3	4	14	14	21	12	16	22	0.217083984318211	0.376666456170757	0.079654394667532	0.0761072425580565	0.0480534893155804	0.0774328639957821	0.279348462670462	0.244807256466136	0.433149632641631	0.232695902043052	0.341095454118654
ENSMUSG00000044770	11.5553921801824	4.1983311867262	6.38313119740178	5.7406102023975	2.55664352861722	1.03501485100159	4.23440184860935	11.0511372825901	16.3295861153505	11.3813243990034	11.4049067277673	19.8148373859334	5.24485385772112	12.3693656265424	-1.25346812579669	0.0166334307591773	0.346538956784707	Scml4	10	42736366	42836776	+	7725	protein_coding	Scm polycomb group protein like 4 [Source:MGI Symbol;Acc:MGI:2446140]	-	11	4	6	7	3	1	4	12	15	11	10	23	0.134325106154181	0.0490673659818421	0.0739316517496705	0.0659300540062801	0.0297340684697054	0.0119782876990239	0.04938643186555	0.129839521321291	0.191442925938696	0.131986521353006	0.131912319634884
ENSMUSG00000107585	133.412255171197	132.247432381875	172.344542329848	86.1091530359625	128.6843909404	113.851633610174	183.137879952355	134.455503604846	210.107341350844	144.85321962368	204.147830427035	136.980832363627	127.77490124491	168.947101220398	-0.403306963658151	0.0166682519008383	0.3467415497241	3300002P13Rik	7	3470181	3471961	-	1092	lncRNA	RIKEN cDNA 3300002P13 gene [Source:MGI Symbol;Acc:MGI:1917480]	-	127	126	162	105	151	110	173	146	193	140	179	159	10.9709460140037	10.9340019868191	14.1211485931204	6.9960119120675	10.5873160922465	9.32101645810032	15.1101790764464	11.1751758335026	17.4253384832204	11.8834018351046	16.7037598702497
ENSMUSG00000050447	40.9691177297376	24.1404043236756	23.4048143904732	22.1423536378189	16.1920756812424	18.6302673180285	26.4650115538085	46.9673334510077	30.4818940819877	33.1093073425554	52.4625709477297	38.7681601029132	24.2465055134961	38.0423795800004	-0.658243706311437	0.0167048643507216	0.346882369598646	Lypd6	2	49956441	50083581	+	3729	protein_coding	LY6/PLAUR domain containing 6 [Source:MGI Symbol;Acc:MGI:2443848]	-	39	23	22	27	19	18	25	51	28	32	46	45	0.986586614900432	0.584476015743081	0.561575230841893	0.526811516467834	0.390115124666221	0.446656182501816	0.639431124566529	1.14314663029757	0.740307587030302	0.795413541979647	1.25704056804119
ENSMUSG00000009614	28.3632353513568	29.3883183070834	27.6602351887411	13.9414819201082	23.8620062670941	32.0854603810491	44.4612194103982	41.4417648097127	32.6591722307011	23.7973146524617	106.065632568236	26.7069547375624	25.8834562359054	45.8553430681787	-0.824763508248364	0.0167804531776087	0.348070342034561	Sardh	2	27078405	27138349	-	5432	protein_coding	sarcosine dehydrogenase [Source:MGI Symbol;Acc:MGI:2183102]	-	27	28	26	17	28	31	42	45	30	23	93	31	0.468885711208131	0.4884605698579	0.455607887025077	0.227705247800724	0.394666114997379	0.528074456318805	0.737455256755233	0.692431633519171	0.544512740381601	0.392467284465715	1.74464484966295
ENSMUSG00000034110	54.6254903063168	32.537066697128	38.2987871844107	41.0043585885536	58.8028011581961	51.7507425500793	80.4536351235777	98.539307436428	56.6092318665485	44.4906317415589	69.5699310393807	53.4139094751248	46.1698744141141	67.1794411137698	-0.539755546128111	0.0168952322208146	0.349303392792344	Kctd7	5	130173702	130184647	+	4368	protein_coding	potassium channel tetramerisation domain containing 7 [Source:MGI Symbol;Acc:MGI:2442265]	-	52	31	36	50	69	50	76	107	52	43	61	62	1.1230102219059	0.672527899982923	0.784508255173358	0.832858560960417	1.20947816285598	1.05920641569322	1.65949943614151	2.04750653113831	1.17372746260034	0.912475498052673	1.42308568726988
ENSMUSG00000042918	653.404903279405	699.022142589912	767.039598887781	610.144855797677	710.746900955588	661.374489790013	768.543935522598	761.607544391831	732.654097042061	733.578090808494	906.690084857502	758.994423348145	683.622148550063	777.011362661772	-0.184779916789242	0.0169907339664885	0.350686668182159	Mamstr	7	45289401	45295945	+	4877	protein_coding	MEF2 activating motif and SAP domain containing transcriptional regulator [Source:MGI Symbol;Acc:MGI:1921740]	-	622	666	721	744	834	639	726	827	673	709	795	881	12.0309694636332	12.9405494090466	14.0721402857437	11.0995164590555	13.0931717740652	12.1238716652654	14.1980928415603	14.1734932664405	13.6053231321965	13.4750028354512	16.6110933360198
ENSMUSG00000043557	233.208824000045	347.411905701593	194.685501520754	320.654084162489	280.378573638356	305.329381045468	414.971381163717	417.180432417775	438.721546965751	206.933170890971	413.998114217954	331.683147547146	280.278045011451	370.581298867219	-0.401652473767541	0.0170000434382058	0.350686668182159	Mdga1	17	30046923	30189061	-	9515	protein_coding	MAM domain containing glycosylphosphatidylinositol anchor 1 [Source:MGI Symbol;Acc:MGI:1922012]	-	222	331	183	391	329	295	392	453	403	200	363	385	2.20093479959024	3.29647998243354	1.83071164454748	2.98986682493235	2.64739458285052	2.86884081766822	3.92937448700101	3.97936299614431	4.17582995942687	1.94830340123627	3.88760093444195
ENSMUSG00000075517	0	0	0	0	0	0	3.17580138645702	0.920928106882504	0	0	10.2644160549906	1.72302933790725	0	2.68069581437289	-3.8934045881466	0.0174321905681124	0.357284442617871	Cyp2d37-ps	15	82572932	82577349	-	4280	transcribed_unprocessed_pseudogene	cytochrome P450, family 2, subfamily d, polypeptide 37, pseudogene [Source:MGI Symbol;Acc:MGI:3721937]	-	0	0	0	0	0	0	3	1	0	0	9	2	0	0	0	0	0	0	0.0668534204722034	0.0195290167875189	0	0	0.214280467818115
ENSMUSG00000028268	87.1906864504673	66.1237161909376	110.640940754964	82.0087171771072	73.2904478203604	35.1905049340539	154.555667474241	116.036941467196	87.0911259485362	96.2239244643017	116.330048623227	84.4284375574554	75.7408355546484	109.111024255826	-0.525470862427578	0.0174986152263506	0.358258135304463	Gbp3	3	142265787	142278970	+	3265	protein_coding	guanylate binding protein 3 [Source:MGI Symbol;Acc:MGI:1926263]	-	83	63	104	100	86	34	146	126	80	93	102	98	2.39804816757363	1.82847322658599	3.03199025092829	2.22843871012257	2.0167257159621	0.963582623016424	4.26496839047171	3.22560740372839	2.41575759530606	2.64018979821895	3.18347051321001
ENSMUSG00000037977	411.792157693773	473.361841303379	360.646912653201	508.454046498064	547.973929633625	545.452826477835	519.772826916798	510.194171212907	556.294566996275	781.172720113417	621.567416663319	515.185772034269	474.613619043313	584.031245656164	-0.297449047375524	0.0176442654990096	0.359684714768831	6430571L13Rik	9	107217801	107229621	+	2912	protein_coding	RIKEN cDNA 6430571L13 gene [Source:MGI Symbol;Acc:MGI:2445137]	-	392	451	339	620	643	527	491	554	511	755	545	598	12.6986540477051	14.6762943334983	11.0811791043237	15.4911692338638	16.9064012764433	16.7460534321098	16.081859667345	15.9016628726723	17.3011942323685	24.032058175457	19.0716811367725
ENSMUSG00000054499	199.593137657696	163.734916282322	176.599963128116	223.063710721731	188.339406608135	184.232643478282	237.126503522124	250.492445072041	200.309589681633	259.701129468169	197.304886390375	220.547755252128	189.260629646047	227.580384897745	-0.264629685770516	0.0178222657654894	0.360756352356333	Dedd2	7	24899340	24920040	-	5981	protein_coding	death effector domain-containing DNA binding protein 2 [Source:MGI Symbol;Acc:MGI:1914629]	-	190	156	166	272	221	178	224	272	184	251	173	256	2.99669672991441	2.47162191710073	2.64187297612412	3.30886448701832	2.82911135502384	2.75384459129624	3.57207330296555	3.8011871231162	3.03312684533537	3.88987194662561	2.94751582959455
ENSMUSG00000022150	195.391176864903	184.726572215953	187.238515123786	166.477695869528	204.531482289378	175.952524670269	258.298512765171	252.334301285806	225.348288391837	222.453158707794	156.247222170412	243.808651313876	185.719661172303	226.41502243915	-0.288936655732992	0.0178301798397681	0.360756352356333	Dab2	15	6329269	6470193	+	7342	protein_coding	disabled 2, mitogen-responsive phosphoprotein [Source:MGI Symbol;Acc:MGI:109175]	-	186	176	176	203	240	170	244	274	207	215	137	283	2.38980001458155	2.27158780948354	2.28179137652892	2.01171075303145	2.50281317274284	2.14253423055613	3.16972505527701	3.11932287756186	2.7797293815983	2.71431011678976	1.90147242818835
ENSMUSG00000047867	203.79509845049	153.239088315506	153.195148737643	155.816562636504	162.772971321963	125.236796971192	169.376073944374	192.473974338443	177.448169120143	191.413183074149	215.552737154802	223.993813927943	159.009277738883	195.042991926642	-0.296087893234013	0.0180897255905809	0.362607720390016	Gimap6	6	48678516	48685159	-	3496	protein_coding	GTPase, IMAP family member 6 [Source:MGI Symbol;Acc:MGI:1918876]	-	194	146	144	190	191	121	160	209	163	185	189	260	5.2347181281975	3.95742482284186	3.92074606246822	3.95426760247294	4.18305441221764	3.20263300042051	4.36510510482121	4.99688103454559	4.59687540558462	4.90496248514185	5.50901843463735
ENSMUSG00000051695	1423.41421855883	1398.04428517982	1551.10088096863	1438.43289928646	1493.07982071246	1687.07420713258	1678.94033297361	1410.861859744	1764.68393953222	1858.25987460092	1823.64458576999	1643.76998836352	1498.52438530647	1696.69343016404	-0.178756003917351	0.0180929975586759	0.362607720390016	Pcbp1	6	86501474	86503303	-	1830	protein_coding	poly(rC) binding protein 1 [Source:MGI Symbol;Acc:MGI:1345635]	-	1355	1332	1458	1754	1752	1630	1586	1532	1621	1796	1599	1908	69.8475538018191	68.9738354840657	75.8375127722338	69.7368584126615	73.3017904340049	82.4194558110296	82.6605403349643	69.9732141612512	87.3330197909905	90.9684150970564	89.0391938807644
ENSMUSG00000031823	435.953432252336	455.518933759792	474.479419006866	477.290733970764	446.560402998475	490.597039374751	545.179238008454	575.580066801565	493.153500683586	521.471590645248	537.171106877841	468.663979910773	463.399993560497	523.536580487911	-0.175555770782336	0.0181509682402157	0.362607720390016	Zdhhc7	8	120807629	120828221	-	3677	protein_coding	zinc finger, DHHC domain containing 7 [Source:MGI Symbol;Acc:MGI:2142662]	-	415	434	446	582	524	474	515	625	453	504	471	544	10.6467599498612	11.1847773020821	11.5456629659925	11.5163070169601	10.9111173745373	11.9282831528776	13.3585630862869	14.2072667681841	12.1464991587893	12.7049304580264	13.053023583996
ENSMUSG00000031250	78.7867648648801	78.7187097511162	62.7674567744509	50.8454046498064	69.029375272665	25.8753712750396	170.434674406526	147.348497101201	256.918821548182	86.911931774208	33.0742295105252	72.3672321921046	61.003847097993	127.842564422124	-1.06740531519438	0.01815144782605	0.362607720390016	Tnmd	X	132751729	132766326	+	1353	protein_coding	tenomodulin [Source:MGI Symbol;Acc:MGI:1929885]	-	75	75	59	62	81	25	161	160	236	84	29	84	5.22909415965051	5.25284648295081	4.1508005144378	3.33409348181901	4.58372751741966	1.70976113220546	11.3494345846233	9.88430945757053	17.1973194520245	5.75462297291983	2.18415797532926
ENSMUSG00000042541	513.689706919018	505.898908000507	439.372197421156	438.746636897523	446.560402998475	463.68665324871	494.366415825142	441.12456319672	695.640368513933	547.338237006619	587.352696480017	552.230902799275	467.992417580898	553.008863970284	-0.240391869286304	0.0181934483390897	0.362666854037501	Sem1	6	6557294	6578663	-	3542	protein_coding	SEM1, 26S proteasome complex subunit [Source:MGI Symbol;Acc:MGI:109238]	-	489	482	413	535	524	448	467	479	639	529	515	641	13.0233675536439	12.8952487200092	11.0988796364315	10.9897826873923	11.3269843552156	11.703686637149	12.5751875308697	11.3034522576025	17.7868422593269	13.843391488427	14.8163939759298
ENSMUSG00000118061	0	0	2.12771039913393	0	4.26107254769537	2.07002970200317	4.23440184860935	10.1302091757075	2.17727814871341	7.242660981184	6.84294403666039	3.44605867581451	1.40980210813875	5.67892547778153	-1.98992313602522	0.0181958527574777	0.362666854037501	Rbfaos	18	80229454	80236784	+	2708	lncRNA	ribosome binding factor A, opposite strand [Source:MGI Symbol;Acc:MGI:5011628]	-	0	0	2	0	5	2	4	11	2	7	6	4	0	0	0.0703005920440922	0	0.141368586243522	0.0683399353581681	0.14088263890745	0.339522197325107	0.0728161793636843	0.239598870087412	0.225780502772411
ENSMUSG00000023008	264.723529945997	185.776155012634	211.707184713826	174.678567587238	220.72355797062	157.322257352241	294.29092847835	325.087621729524	206.841424127774	226.591822125614	239.503041283114	238.639563300155	202.488542097093	255.159066840755	-0.335366380793328	0.0182637361866851	0.362725365335751	Fmnl3	15	99215106	99268363	-	5021	protein_coding	formin-like 3 [Source:MGI Symbol;Acc:MGI:109569]	-	252	177	199	213	259	152	278	353	190	219	210	277	4.73449121236885	3.34052161875733	3.77259775421479	3.0865496091639	3.94949086121456	2.80121597613899	5.28081217650179	5.87636321913066	3.73086841328449	4.04286536839786	4.26199483225833
ENSMUSG00000104348	57.776960900912	90.2641205146132	64.8951671735848	45.92488161918	46.8717980246491	41.4005940400634	102.684244828777	79.1998171918954	69.672900758829	84.8426000652983	69.5699310393807	74.0902615300119	57.8555870455004	80.0099592356987	-0.474073534719577	0.018291410069471	0.362725365335751	Gm37691	1	192963579	192966151	+	2573	TEC	predicted gene, 37691 [Source:MGI Symbol;Acc:MGI:5610919]	-	55	86	61	56	55	40	97	86	64	82	61	86	2.01644276144782	3.16730514866273	2.25666813031082	1.58355123886052	1.63664494637467	1.43851181461266	3.59565566047933	2.79371958769916	2.45237420868225	2.9539929318822	2.41587185464237
ENSMUSG00000062591	14.7068627747776	24.1404043236756	20.2132487917723	9.02095888948179	12.7832176430861	12.420178212019	28.5822124781131	38.6789804890652	25.0386987102042	31.0399756336457	21.6693227827579	13.784234703258	15.5474784391354	26.4655707995074	-0.779719784918355	0.0183719379626854	0.363202748853363	Tubb4a	17	57387066	57394782	-	2228	protein_coding	tubulin, beta 4A class IVA [Source:MGI Symbol;Acc:MGI:107848]	-	14	23	19	11	15	12	27	42	23	30	19	16	0.592755844237582	0.978236563153478	0.811738344221865	0.359220719362891	0.515475042478623	0.498378487297807	1.15583202719447	1.5756445501456	1.01779239575577	1.24807721248405	0.869004969228461
ENSMUSG00000047631	0	1.04958279668155	4.25542079826785	0	0	0	2.11720092430468	6.44649674817753	0	0	20.5288321099812	10.3381760274435	0.884167265824901	6.57178430165115	-2.94535344044481	0.0185346652614	0.365476788461874	Apof	10	128103866	128106022	+	1932	protein_coding	apolipoprotein F [Source:MGI Symbol;Acc:MGI:104539]	-	0	1	4	0	0	0	2	7	0	0	18	12	0	0.0490483180913212	0.197074537531472	0	0	0	0.0987345202280988	0.302841274820945	0	0	0.94940000234113
ENSMUSG00000026005	165.977451315347	128.049101195149	147.875872739808	126.293424452745	137.206536035791	144.902079140222	167.258873020069	190.632118124678	182.891364491926	176.927861111781	212.131265136472	126.642656336183	141.717410813177	176.080689703518	-0.311890656327017	0.0185888706591663	0.365476788461874	Rpe	1	66739990	66758964	+	3113	protein_coding	ribulose-5-phosphate-3-epimerase [Source:MGI Symbol;Acc:MGI:1913896]	-	158	122	139	154	161	140	158	207	168	171	186	147	4.78785469487152	3.71374390215123	4.25023874919705	3.59936160564321	3.95984626913849	4.16142568149513	4.84087772353815	5.5579594324029	5.32079728628846	5.09157769600466	6.08860316310258
ENSMUSG00000046798	281.531373117171	330.618580954688	303.198731876585	343.616524972079	352.816806949177	284.629084025436	388.506369609908	372.054955180532	323.325805083941	356.959719786926	439.088909019042	347.190411588311	316.068516982523	371.187695044777	-0.22836605388204	0.0185888807032507	0.365476788461874	Cldn12	5	5539537	5564958	-	4228	protein_coding	claudin 12 [Source:MGI Symbol;Acc:MGI:1929288]	-	268	315	285	419	414	275	367	404	297	345	385	403	5.97947164511483	7.06003439546269	6.41634235191455	7.21045920246579	7.49716265187546	6.01853711698531	8.27898760177532	7.9867581616922	6.92576933229736	7.56344236950483	9.27917993458135
ENSMUSG00000048481	67.2313726846976	56.6774710208037	87.236126364491	77.0881941464807	83.5170219348293	68.3109801661046	83.6294365100347	98.539307436428	103.420712063887	93.1199269009371	99.2226885315757	86.1514668953626	73.3435277195678	94.0139230563708	-0.353191780788035	0.0185992785589272	0.365476788461874	Mypop	7	18725170	18735691	+	2655	protein_coding	Myb-related transcription factor, partner of profilin [Source:MGI Symbol;Acc:MGI:2446472]	-	64	54	82	94	98	66	79	107	95	90	87	100	2.27393708209646	1.92734950276134	2.93986219716439	2.57600800197258	2.82613641368368	2.3002372818634	2.83797596108743	3.36855311789535	3.52781361640328	3.14205201063782	3.33917032838474
ENSMUSG00000037254	12.6058823783808	0	8.51084159653571	14.7615690918793	9.37435960492982	4.14005940400634	20.1134087808944	23.0232026720626	10.886390743567	3.10399756336457	92.3797444949153	33.5990720891914	8.23211867928866	30.5176360573326	-1.88256052384198	0.0186038453942997	0.365476788461874	Itih2	2	10099404	10136207	-	3315	protein_coding	inter-alpha trypsin inhibitor, heavy chain 2 [Source:MGI Symbol;Acc:MGI:96619]	-	12	0	8	18	11	4	19	25	10	3	81	39	0.34147641136686	0	0.229712221122657	0.395068907975576	0.254062591072219	0.111652817466015	0.546658637787791	0.630348354830926	0.297415103645335	0.0838828364830912	2.48991964414895
ENSMUSG00000026080	0	1.04958279668155	1.06385519956696	2.46026151531322	2.55664352861722	0	9.52740415937105	1.84185621376501	6.53183444614022	6.20799512672914	3.4214720183302	2.58454400686088	1.18839050669649	5.01918432853275	-1.99965844794035	0.0186794724614915	0.366582227435985	Chst10	1	38902948	38937242	-	11964	protein_coding	carbohydrate sulfotransferase 10 [Source:MGI Symbol;Acc:MGI:2138283]	-	0	1	1	3	3	0	9	2	6	6	3	3	0	0.00792054083520834	0.00795611849111508	0.0182443640635662	0.0191989032872346	0	0.0717484051206195	0.0139726164912372	0.0494448880934947	0.0464847213208705	0.025552223399686
ENSMUSG00000062960	547.305393261367	331.66816375137	411.711962232415	604.40424559528	527.520781404687	392.270628529601	690.207501323325	889.616551248499	388.644149545343	552.511566278894	601.038584553338	580.660886874744	469.146862462453	617.113206637357	-0.39494197661172	0.018728772424234	0.366789547228691	Kdr	5	76093487	76139118	-	9030	protein_coding	kinase insert domain protein receptor [Source:MGI Symbol;Acc:MGI:96683]	-	521	316	387	737	619	379	652	966	357	534	527	674	5.44268209872532	3.31612256639742	4.07944292690146	5.93832027725526	5.24849115011907	3.88369117032222	6.88661797832823	8.94156470959702	3.89786701533322	5.48136714546818	5.9471201180242
ENSMUSG00000046380	14.7068627747776	22.0412387303125	29.787945587875	37.7240099014693	27.2708643052504	27.9454009770428	42.3440184860935	34.9952680615352	35.9250894537712	45.5252975960137	36.4957015288554	42.2142187787277	26.5793870461213	39.5832656508328	-0.564786579517471	0.0187701627727544	0.367220395238041	Jrk	15	74574150	74581384	-	5853	protein_coding	jerky [Source:MGI Symbol;Acc:MGI:106214]	-	14	21	28	46	32	27	40	38	33	44	32	49	0.225638137871405	0.339994594498733	0.455362386054267	0.571825063853253	0.418603663404019	0.426853127767625	0.651819897764179	0.542661761544861	0.555881176546752	0.696802239844164	0.557128402763426
ENSMUSG00000025854	264.723529945997	206.767810946265	206.387908715991	199.28118274037	284.639646186051	190.442732584292	306.994134024178	300.222562843696	291.755271927596	245.215807505801	280.560705503076	230.885931279572	225.373801853161	275.93906884732	-0.289811460966869	0.0188295266640316	0.367372113742161	Fam20c	5	138740269	138795832	+	6590	protein_coding	FAM20C, golgi associated secretory pathway kinase [Source:MGI Symbol;Acc:MGI:2136853]	-	252	197	194	243	334	184	290	326	268	237	246	268	3.60726561112352	2.83277481924571	2.80216666400212	2.68290156360804	3.88054409520033	2.58360214497611	4.19719097066762	4.13481738137926	4.00955275236098	3.33348355574724	3.80393894716467
ENSMUSG00000094595	5.252450990992	5.24791398340775	13.8301175943705	7.38078454593965	2.55664352861722	3.10504455300476	15.8790069322851	18.4185621376501	16.3295861153505	8.27732683563886	4.56196269110693	18.9533227169798	6.22882586605532	13.7366279048352	-1.15975071422121	0.0189449366606555	0.368292525034392	Fsbp	4	11579665	11587591	+	4358	protein_coding	fibrinogen silencer binding protein [Source:MGI Symbol;Acc:MGI:5301008]	-	5	5	13	9	3	3	15	20	15	8	4	22	0.108229530335125	0.108721145654466	0.28394470425886	0.150258539460651	0.052706672539806	0.0636982141865256	0.328284350184753	0.383589682655258	0.339352134666459	0.170152426459506	0.0935312225038531
ENSMUSG00000047414	106.099510018038	56.6774710208037	59.57589117575	86.1091530359625	85.2214509539075	50.7157276990777	140.793861466261	162.083346811321	53.3433146434784	104.501251299941	101.503669877129	93.9050989159453	74.0665339839233	109.355090502346	-0.561204803534722	0.0191196586097922	0.369005357218818	Flrt2	12	95659000	95751989	+	7721	protein_coding	fibronectin leucine rich transmembrane protein 2 [Source:MGI Symbol;Acc:MGI:3603594]	-	101	54	56	105	100	49	133	176	49	101	89	109	1.23398765997275	0.66275261362924	0.690386231207259	0.989463153474642	0.991649090914279	0.587240169832019	1.6429495777575	1.9052995422487	0.625704213970081	1.21250407533939	1.17462786629936
ENSMUSG00000018339	2543.23676983833	3912.84466602882	4020.30879916356	3145.03430374206	3167.68133195674	4283.92646829556	4470.46975166932	4331.12488666842	6055.01053157198	3906.89826642154	4085.23758988626	3325.446622161	3512.17205650418	4362.36460806309	-0.312736723057182	0.0191681806357123	0.369005357218818	Gpx3	11	54793279	54801203	+	1813	protein_coding	glutathione peroxidase 3 [Source:MGI Symbol;Acc:MGI:105102]	-	2421	3728	3779	3835	3717	4139	4223	4703	5562	3776	3582	3860	125.96792651278	194.854007092923	198.406883150072	153.904544457198	156.973494866177	211.247146041841	222.161819657954	216.820989670867	302.468207582228	193.049893860435	201.331450689514
ENSMUSG00000033350	26.26225495496	14.6941591535417	15.9578279935045	9.84104606125286	19.6009337193987	16.5602376160254	23.2892101673514	23.0232026720626	40.279645751198	22.7626487980069	38.7766828744089	21.5378667238407	17.1527432497805	28.2782094978114	-0.720013197156934	0.0191731582798245	0.369005357218818	Chst2	9	95281345	95288775	-	7328	protein_coding	carbohydrate sulfotransferase 2 [Source:MGI Symbol;Acc:MGI:1891160]	-	25	14	15	12	23	16	22	25	37	22	34	25	0.321823344159713	0.181039698107813	0.19484238870299	0.119146054397656	0.240311163362214	0.202035529421309	0.286340887539241	0.285153492940027	0.497809082118157	0.278273984020735	0.47279981921537
ENSMUSG00000033707	3.1514705945952	4.1983311867262	4.25542079826785	1.64017434354214	6.8177160763126	1.03501485100159	9.52740415937105	10.1302091757075	5.44319537178351	12.4159902534583	5.70245336388366	8.61514668953626	3.51635464174093	8.63906650229005	-1.29569632768037	0.0192505199675383	0.370118118929179	Lrrc24	15	76599476	76606373	-	2202	protein_coding	leucine rich repeat containing 24 [Source:MGI Symbol;Acc:MGI:3605040]	-	3	4	4	2	8	1	9	11	5	12	5	10	0.128518880981056	0.172136876571176	0.172910084700637	0.066084036226614	0.278166126465001	0.0420219221048863	0.389826484497317	0.417541376183646	0.223871723111781	0.505125527595726	0.231385710531217
ENSMUSG00000030862	108.200490414435	200.470314166176	164.897555932879	82.0087171771072	115.901173297314	70.3810098681078	296.408129402655	328.771334157054	352.719060091572	146.92255133259	102.644160549906	138.703861701534	123.64321014267	227.694849539218	-0.88188864658263	0.0193320481608706	0.37130864915879	Cpxm2	7	131634416	131756468	-	4622	protein_coding	carboxypeptidase X 2 (M14 family) [Source:MGI Symbol;Acc:MGI:1926006]	-	103	191	155	100	136	68	280	357	324	142	90	161	2.1021818346884	3.91592772728573	3.19212143061307	1.5741783618672	2.25289285549347	1.36135753533043	5.77795608639034	6.45598366305871	6.91132986199282	2.84769707325007	1.98425011307125
ENSMUSG00000006362	330.904412432496	334.816912141414	329.795111865759	267.348417997369	369.861097139958	281.524039472431	484.839011665771	469.673334510077	336.389473976221	323.85041244437	401.45271681741	325.652544864471	319.041665174905	390.30958237972	-0.290946501051507	0.0196061634894991	0.374578418394216	Cbfa2t3	8	123351880	123425848	-	8373	protein_coding	CBFA2/RUNX1 translocation partner 3 [Source:MGI Symbol;Acc:MGI:1338013]	-	315	319	310	326	434	272	458	510	309	313	352	378	3.54888934332139	3.61027956840153	3.52418135728977	2.83282918746849	3.96862632489183	3.00594507502556	5.21711648339631	5.09111881569285	3.63851308004949	3.4649632437865	4.28396010451662
ENSMUSG00000060548	254.218627964013	195.222400182768	188.302370323353	150.896039605877	148.285324659799	101.431455398155	301.701131713416	330.613190370819	172.004973748359	155.199878168229	241.784022628667	242.085621975969	173.059369688994	240.56480310091	-0.477535302881555	0.0196180201024947	0.374578418394216	Tnfrsf19	14	61201324	61283939	-	4738	protein_coding	tumor necrosis factor receptor superfamily, member 19 [Source:MGI Symbol;Acc:MGI:1352474]	-	242	186	177	184	174	98	285	359	158	150	212	281	4.8181831555304	3.72005301873205	3.55595172817709	2.82557374312629	2.81180864876562	1.91392205625708	5.73714663655506	6.33320491227491	3.28782416286022	2.93448293522	4.55957800477099
ENSMUSG00000026839	13.6563725765792	6.2974967800893	26.5963799891741	12.3013075765661	24.7142207766332	18.6302673180285	24.3478106295038	30.3906275271226	29.393255007631	12.4159902534583	79.8343470943713	24.1224107307015	17.0326741695117	33.4174068737981	-0.965353837608516	0.0196560645025577	0.374870644057843	Upp2	2	58457310	58682983	+	7761	protein_coding	uridine phosphorylase 2 [Source:MGI Symbol;Acc:MGI:1923904]	-	13	6	25	15	29	18	23	33	27	12	70	28	0.158011488509372	0.0732596448028083	0.306619641887968	0.140623355016432	0.286096065323444	0.214609058697239	0.282654757174063	0.355402439256432	0.342998825560826	0.143317409066588	0.919103038816693
ENSMUSG00000039081	487.427451964058	660.187579112694	578.737228564428	624.086337717786	666.431746459556	617.903866047946	666.918291155973	608.733478649335	827.365696511094	822.559354291611	789.219545561499	600.475724260678	605.795701644411	719.212015071698	-0.245568102148035	0.0196930188222042	0.375197575910366	Zfp503	14	22034027	22039669	-	4216	protein_coding	zinc finger protein 503 [Source:MGI Symbol;Acc:MGI:1353644]	-	464	629	544	761	782	597	630	661	760	795	692	697	10.3819844423634	14.137782138871	12.282193758413	13.1331206539058	14.2016145574057	13.1028858319618	14.2523373625276	13.1046372896665	17.7729509517091	17.4784095776764	16.7258939058871
ENSMUSG00000006014	170.179412108141	252.949454000253	224.473447108629	186.159787992033	114.196744278236	112.816618759173	391.682170996365	479.803543685785	563.915040516772	354.890388078016	98.082197858799	161.964757763282	176.795910707744	341.72301648317	-0.951095064148504	0.0197537134993417	0.375975704774404	Prg4	1	150325163	150341916	-	4280	protein_coding	proteoglycan 4 (megakaryocyte stimulating factor, articular superficial zone protein) [Source:MGI Symbol;Acc:MGI:1891344]	-	162	241	211	227	134	109	370	521	518	343	86	188	3.57054278030267	5.33586109419071	4.69263022043104	3.85892171074976	2.39713559006352	2.35654619153519	8.24525519157175	10.1746177462973	11.9325302225855	7.42823674524271	2.04756891470643
ENSMUSG00000026617	138.664706162189	138.544929161964	129.79033434717	131.213947483371	193.45269366537	140.762019736216	147.145464239175	219.180889438036	182.891364491926	220.383826998885	183.618998317054	149.042037728977	145.40477175938	183.710430202342	-0.334670706795866	0.0197772608994152	0.376045950715989	Bpnt1	1	185064346	185089974	+	2308	protein_coding	3'(2'), 5'-bisphosphate nucleotidase 1 [Source:MGI Symbol;Acc:MGI:1338800]	-	132	132	122	160	227	136	139	238	168	213	161	173	5.39512016485813	5.41962663471451	5.03154861290273	5.04391846693255	7.53046203303924	5.45250825675672	5.74414166772433	8.6191670972436	7.17662129645407	8.55419575773083	7.1084336974825
ENSMUSG00000020473	3638.89804655926	4694.78384955657	4028.81964076009	3678.09096539326	4959.88844551741	4927.70570561855	5877.34976586978	5867.23296894844	4522.20671487774	3898.6209395859	5667.09815302758	5125.15076560512	4321.36444223419	5159.60988465243	-0.255800990370272	0.0198102435259075	0.376155813270724	Aebp1	11	5811947	5822088	+	4058	protein_coding	AE binding protein 1 [Source:MGI Symbol;Acc:MGI:1197012]	-	3464	4473	3787	4485	5820	4761	5552	6371	4154	3768	4969	5949	80.5246481836594	104.452321592171	88.830255092189	80.4144848759183	109.810157003756	108.562382763253	130.491902018725	131.22594536226	100.925521412004	86.066518801	124.778798500563
ENSMUSG00000067224	2.1009803963968	3.14874839004465	1.06385519956696	0.820087171771072	2.55664352861722	2.07002970200317	4.23440184860935	6.44649674817753	2.17727814871341	10.3466585445486	2.28098134555346	11.1996906963971	1.96005739806665	6.11425122199991	-1.66866888568478	0.0198227638422316	0.376155813270724	Gm3695	12	81418987	81419995	-	1009	processed_pseudogene	predicted gene 3695 [Source:MGI Symbol;Acc:MGI:3781871]	-	2	3	1	1	3	2	4	7	2	10	2	13	0.186982871437255	0.281748316806043	0.0943379599878105	0.072109538043114	0.227646857213552	0.183413820564836	0.378107221170836	0.579870508378658	0.195427367410165	0.918637604695895	0.201986653950343
ENSMUSG00000086534	11.5553921801824	20.991655933631	17.0216831930714	21.3222664660479	8.52214509539075	11.3851633610174	13.7618060079804	34.0743399546527	32.6591722307011	22.7626487980069	22.8098134555346	27.568469406516	15.1330510382235	25.606041642232	-0.762305839162387	0.0199564921441107	0.377967401263592	Gm16758	17	30109058	30116041	+	3848	lncRNA	predicted gene, 16758 [Source:MGI Symbol;Acc:MGI:4439682]	-	11	20	16	26	10	11	13	37	30	22	20	32	0.26966253769258	0.49252261201888	0.395787948555928	0.491611647875014	0.198974080845872	0.264515331919063	0.322221441014674	0.803694152409431	0.768657278002301	0.52993548724115	0.529637561943596
ENSMUSG00000029661	2312.12892623468	2257.65259566201	2854.32350043816	1367.08531534238	1960.94558644941	1188.19704894982	4785.93268939072	5329.41095452905	7474.59588453312	2494.57937509066	1334.37408714878	1729.92145525888	1990.05549551274	3858.13574099187	-0.955129139045002	0.0200503139201828	0.377967401263592	Col1a2	6	4504814	4541544	+	12426	protein_coding	collagen, type I, alpha 2 [Source:MGI Symbol;Acc:MGI:88468]	-	2201	2151	2683	1667	2301	1148	4521	5787	6866	2411	1170	2008	16.7090473094197	16.4036427682506	20.5526094774764	9.76086104274359	14.1780609800531	8.54877263811795	34.701584412433	38.9265828294955	54.477729896183	17.9846192041373	9.59485371752769
ENSMUSG00000020716	246.865196576624	240.354460440075	257.452958295205	218.143187691105	281.230788147895	261.858757303401	294.29092847835	340.743399546527	258.007460622539	256.597131904805	327.320823086922	298.084075457955	250.984224742384	295.840636516183	-0.238427408491628	0.0200918307737366	0.377967401263592	Nf1	11	79230519	79472438	+	15850	protein_coding	neurofibromin 1 [Source:MGI Symbol;Acc:MGI:97306]	-	235	229	242	266	330	253	278	370	237	248	287	346	1.39862597983737	1.36910720987426	1.45332835292767	1.22105787719518	1.59410250360455	1.47701356064131	1.67286800872022	1.95117671827854	1.47423131390836	1.45029984289125	1.84517038520196
ENSMUSG00000031990	112.402451207229	67.1732989876191	77.6614295683883	82.0087171771072	43.4629399864928	66.2409504641014	89.9810392829488	122.483438215373	104.509351138243	86.911931774208	95.8012165132455	109.412362957111	74.8249645651563	101.516556646855	-0.445944847510739	0.0200933263460964	0.377967401263592	Jam3	9	27008680	27066717	-	3200	protein_coding	junction adhesion molecule 3 [Source:MGI Symbol;Acc:MGI:1933825]	-	107	64	73	100	51	64	85	133	96	84	84	127	3.15425496077818	1.89522701104865	2.17145347463192	2.27370387142194	1.22025829430752	1.85064544949919	2.53346607997787	3.47396797378976	2.95779320575285	2.43312652573766	2.67493450659613
ENSMUSG00000105004	2.1009803963968	0	2.12771039913393	4.92052303062643	1.70442901907815	2.07002970200317	1.05860046215234	1.84185621376501	11.9750298179237	14.485321962368	3.4214720183302	12.9227200343044	2.15394542453975	7.61750008480728	-1.79793687792823	0.0201158218419378	0.377967401263592	Gm43075	3	97517248	97521152	+	3905	TEC	predicted gene 43075 [Source:MGI Symbol;Acc:MGI:5663212]	-	2	0	2	6	2	2	1	2	11	14	3	15	0.0483138840666301	0	0.0487513452638672	0.111792866405381	0.0392139443326461	0.0473916888476105	0.024424467744006	0.0428088050451118	0.277727061573038	0.332309213929173	0.0782859925105874
ENSMUSG00000039994	73.5343138738881	55.6278882241221	40.4264975835446	39.3641842450114	64.7683027249697	45.5406534440697	107.977247139539	51.5719739854203	78.3820133536826	76.5652732296594	78.6938564215945	60.3060268267539	53.2103066826009	75.5827318261082	-0.503063167717846	0.0201534923930522	0.377967401263592	Timeless	10	128067934	128088810	+	6115	protein_coding	timeless circadian clock 1 [Source:MGI Symbol;Acc:MGI:1321393]	-	70	53	38	48	76	44	102	56	72	74	69	70	1.07985283807141	0.821316693259023	0.591513665061755	0.571121691987587	0.951587440641267	0.665808665396275	1.59092555144972	0.765448036571141	1.16086732523415	1.12168430731355	1.14983751714447
ENSMUSG00000119960	4.2019607927936	3.14874839004465	4.25542079826785	4.10043585885536	3.4088580381563	5.17507425500793	5.29300231076169	20.2604183514151	4.35455629742681	5.17332927227429	12.5453974005441	10.3381760274435	4.04841635552095	9.66081327664424	-1.26805760543096	0.0201642205088371	0.377967401263592	ENSMUSG00000119960	9	66920349	66929969	+	854	lncRNA	novel transcript, antisense to Tpm1and KO:Tpm1	-	4	3	4	5	4	5	5	22	4	5	11	12	0.441840087307238	0.332885306390278	0.445840757038411	0.425986673802705	0.358619326976541	0.541758035567679	0.558416548831051	2.15322274088147	0.461794411514887	0.542684627130069	1.312558473182
ENSMUSG00000062661	99.7965688288481	76.6195441577531	73.4060087701205	68.88732242877	69.029375272665	46.5756682950713	101.625644366624	118.799725787843	79.4706524280393	88.9812634831177	94.6607258404688	90.4590402401308	72.3857479588713	95.666175357704	-0.405804091014311	0.0201727355599997	0.377967401263592	Ncs1	2	31135835	31186001	+	4653	protein_coding	neuronal calcium sensor 1 [Source:MGI Symbol;Acc:MGI:109166]	-	95	73	69	84	81	45	96	129	73	86	83	105	1.9259878725143	1.48669215351979	1.41154161021091	1.31350010882918	1.33285693768941	0.894896252175624	1.96781527355963	2.31729223054479	1.54680782305293	1.71317127680811	1.81772795061029
ENSMUSG00000025255	135.513235567594	144.842425942054	140.428886342839	137.77464485754	140.615394073947	129.376856375198	151.379866087784	185.106549483383	160.029943930435	193.482514783058	144.842315442645	158.518699087467	138.091907193195	165.559981469129	-0.263338350829397	0.0201952908010157	0.377967401263592	Zfhx4	3	5283586	5480917	+	15737	protein_coding	zinc finger homeodomain 4 [Source:MGI Symbol;Acc:MGI:2137668]	Homeobox	129	138	132	168	165	125	143	201	147	187	127	184	0.773269286685663	0.830975813448287	0.798416738568756	0.776732033600072	0.802774502196485	0.734989773106052	0.866682922746973	1.06757466874034	0.920962490194382	1.10142529813075	0.822366899572942
ENSMUSG00000039158	28.3632353513568	28.3387355104018	38.2987871844107	25.4227023249032	19.6009337193987	30.015430679046	27.5236120159608	58.9393988404803	38.1023676024846	54.8372902861074	44.4791362382926	31.0145280823305	28.3399707949195	42.4827221776094	-0.59217895603386	0.0202034938005607	0.377967401263592	Akna	4	63285362	63321591	-	5765	protein_coding	AT-hook transcription factor [Source:MGI Symbol;Acc:MGI:2140340]	-	27	27	36	31	23	29	26	64	35	53	39	36	0.44180176639767	0.443808580210872	0.59440278553291	0.391242713000965	0.305464042518353	0.465470234479415	0.430150253260873	0.92790776729179	0.598570466616652	0.85214194598998	0.689364858594964
ENSMUSG00000026405	0	3.14874839004465	1.06385519956696	0	0	0	7.41020323506637	1.84185621376501	0	0	19.3883414372044	4.30757334476813	0.702100598268602	5.49132903846733	-3.01388414420797	0.0202983502172087	0.378224828233161	C4bp	1	130562510	130589369	-	6730	protein_coding	complement component 4 binding protein [Source:MGI Symbol;Acc:MGI:88229]	-	0	3	1	0	0	0	7	2	0	0	17	5	0	0.0422413152536847	0.0141436852344281	0	0	0	0.0992039860003572	0.024839284353813	0	0	0.257405429064653
ENSMUSG00000032332	128.159804180205	93.4128689046579	128.726479147603	77.9082813182518	138.05875054533	48.6456979970745	241.360905370733	280.883072599164	332.034917678794	177.962526966235	42.1981548927391	150.765067066885	102.485313682187	204.200774095758	-0.994747040439229	0.0203585959339046	0.378362207847189	Col12a1	9	79506273	79626113	-	15228	protein_coding	collagen, type XII, alpha 1 [Source:MGI Symbol;Acc:MGI:88448]	-	122	89	121	95	162	47	228	305	305	172	37	175	0.755753135939822	0.553832427053224	0.756345363603349	0.453904634168813	0.814523684143526	0.28559343356469	1.42803261171515	1.67409893055077	1.97471090043477	1.04693800249385	0.247595473861576
ENSMUSG00000027562	168.078431711744	159.536585095595	132.98189994587	139.414819201082	129.536605449939	159.392287054244	170.434674406526	197.078614872856	162.207222079149	188.309185510784	171.07360091651	172.302933790725	148.156771409746	176.901038596092	-0.260348020147326	0.0205829959557708	0.380966659677429	Car2	3	14951333	14965830	+	2422	protein_coding	carbonic anhydrase 2 [Source:MGI Symbol;Acc:MGI:88269]	-	160	152	125	170	152	154	161	214	149	182	150	200	6.23173302329283	5.94703768950031	4.91262394858076	5.10691538420121	4.80508439266833	5.88355489725177	6.3401259260922	7.38522586953934	6.06538931540291	6.96518465941968	6.31104047799017
ENSMUSG00000062825	1943.40686666704	1731.81161452456	1759.61650008376	1529.46257535305	1672.8970822252	1796.78578133875	2586.16092903816	2262.72035861031	2183.80998315955	1484.74550114272	1994.7181866865	1864.31774361565	1738.99673669873	2062.74545037548	-0.246525003292873	0.0205937540449142	0.380966659677429	Actg1	11	120236516	120239368	-	2658	protein_coding	actin, gamma, cytoplasmic 1 [Source:MGI Symbol;Acc:MGI:87906]	-	1850	1650	1654	1865	1963	1736	2443	2457	2006	1435	1749	2164	65.6568052987871	58.8247661442866	59.232242547862	51.051409724026	56.5453496032851	60.4349228805605	87.6626584642811	77.2634911124443	74.4084922340134	50.0417293981662	67.0530717981531
ENSMUSG00000021764	1464.38333628857	1432.68051747031	1334.07442025697	1431.87220191229	1124.07093808204	1296.87360830499	1540.26367243165	1485.45703640148	1506.67647890968	1483.71083528827	1517.99308546583	1474.05159857965	1347.32583705253	1501.35878451276	-0.156523202853485	0.0206186010025759	0.380966659677429	Ndufs4	13	114424331	114524794	-	2708	protein_coding	NADH:ubiquinone oxidoreductase core subunit S4 [Source:MGI Symbol;Acc:MGI:1343135]	-	1394	1365	1254	1746	1319	1253	1455	1613	1384	1434	1331	1711	48.5598245732248	47.765599521444	44.0784712116458	46.9115150310512	37.2930330510411	42.8149695018923	51.2460599025848	49.7863003895815	50.3887961196695	49.0835399579069	50.0856415316797
ENSMUSG00000086592	1.0504901981984	1.04958279668155	1.06385519956696	0.820087171771072	0	5.17507425500793	6.35160277291403	4.60464053441252	2.17727814871341	0	14.8263787460975	10.3381760274435	1.52651493687099	6.38301270493017	-2.09446561539544	0.0206636340037113	0.381411209319965	Gm12682	4	99550778	99601209	-	1081	lncRNA	predicted gene 12682 [Source:MGI Symbol;Acc:MGI:3650643]	-	1	1	1	1	0	5	6	5	2	0	13	12	0.0872644390750187	0.0876608238227868	0.0880545805991682	0.067306682595284	0	0.427993859736168	0.529385087180445	0.386605882750142	0.182410928507731	0	1.22546666968855
ENSMUSG00000039114	16.8078431711744	9.44624517013394	3.19156559870089	6.56069737416857	5.96550156677352	8.28011880801268	12.7032055458281	6.44649674817753	10.886390743567	26.9013122158263	26.2312854738648	20.676352054887	8.37532861482734	17.3075071303585	-1.05282443107434	0.0208212586160901	0.382464859829554	Nrn1	13	36909335	36919105	-	2249	protein_coding	neuritin 1 [Source:MGI Symbol;Acc:MGI:1915654]	-	16	9	3	8	7	8	12	7	10	26	23	24	0.671109710200766	0.379213941739392	0.126972434363318	0.258812001371283	0.23830884133679	0.329149924321777	0.50890642885021	0.260155332571839	0.438386424448326	1.07156687067995	1.04213078662197
ENSMUSG00000025207	8.40392158558721	3.14874839004465	13.8301175943705	13.9414819201082	11.078788624008	12.420178212019	23.2892101673514	17.4976340307676	11.9750298179237	10.3466585445486	62.7269870027203	11.1996906963971	10.4705393876896	22.8392017099515	-1.11013995131103	0.0208269929435601	0.382464859829554	Sema4g	19	44977540	44991836	+	8661	protein_coding	sema domain, immunoglobulin domain (Ig), transmembrane domain (TM) and short cytoplasmic domain, (semaphorin) 4G [Source:MGI Symbol;Acc:MGI:1347047]	-	8	3	13	17	13	12	22	19	11	10	55	13	0.0871334567741325	0.032823467458411	0.142873920004631	0.14281202009624	0.114922981413623	0.128205434672615	0.24227064125246	0.183362157390721	0.125219279002738	0.107020591518088	0.647110573892984
ENSMUSG00000020156	341.40931441448	280.238606713974	242.558985501268	289.490771635188	316.171583038997	328.099707767502	346.162351123815	311.273700126286	335.300834901865	363.167714913655	361.535543270224	384.235542353317	299.661494845235	350.27928111486	-0.224958216141421	0.0208492515926107	0.382464859829554	Pwwp3a	10	80062268	80079737	+	10361	protein_coding	PWWP domain containing 3A, DNA repair factor [Source:MGI Symbol;Acc:MGI:1915364]	-	325	267	228	353	371	317	327	338	308	351	317	446	2.9589980752853	2.44197284021808	2.0946468845783	2.47888803509142	2.74159820102513	2.83107136131283	3.01017833401142	2.72671140290477	2.93086351823144	3.14008083622713	3.11775104844991
ENSMUSG00000087526	3.1514705945952	3.14874839004465	1.06385519956696	0.820087171771072	0.852214509539075	1.03501485100159	3.17580138645702	0	4.35455629742681	13.4506561079131	10.2644160549906	6.03060268267538	1.67856511941976	6.21267208824382	-1.90736599066777	0.0209036164288976	0.382464859829554	Gm15738	16	13172238	13286619	-	1841	lncRNA	predicted gene 15738 [Source:MGI Symbol;Acc:MGI:3783180]	-	3	3	1	1	1	1	3	0	4	13	9	7	0.153720030374951	0.154418279009939	0.0517039661204241	0.0395211971132548	0.041588933356595	0.0502619622351763	0.155422400663243	0	0.21421641902972	0.654523055991095	0.498164259783559
ENSMUSG00000036775	79.8372550630785	50.3799742407144	72.3421535705535	55.7659276804329	53.6895141009617	49.6807128480761	75.160632812816	95.7765231157805	75.1160961306125	72.42660981184	62.7269870027203	100.797216267574	60.2825895839695	80.3340108568906	-0.42391450300458	0.0209324478362972	0.382464859829554	Decr2	17	26300182	26309311	-	2653	protein_coding	2-4-dienoyl-Coenzyme A reductase 2, peroxisomal [Source:MGI Symbol;Acc:MGI:1347059]	-	76	48	68	68	63	48	71	104	69	70	55	117	2.70233594295033	1.71449107671193	2.43977237492788	1.8648999714339	1.81817160101695	1.67416097956957	2.55250878415544	3.27657593383355	2.56423836156486	2.44566053598458	2.11256113097894
ENSMUSG00000052512	464.316667603693	430.328946639435	322.34812546879	370.679401640524	323.841513624848	332.239767171509	485.897612127923	506.510458785377	430.012434370898	360.06371735029	506.377858712869	414.388555766694	373.959070358133	450.541772852342	-0.269373612482999	0.0210118496477006	0.382993052383645	Nav2	7	48558464	49259838	+	32228	protein_coding	neuron navigator 2 [Source:MGI Symbol;Acc:MGI:2183691]	-	442	410	303	452	380	321	459	550	395	348	444	481	1.2937546083816	1.20554032910815	0.894925576926689	1.02044349001635	0.902779756659016	0.921647618979211	1.35839313212168	1.42643991305137	1.2083988211828	1.00087830275561	1.40389122848358
ENSMUSG00000046743	91.3926472432609	70.3220473776638	65.9590223731517	66.4270609134568	82.6648074252902	45.5406534440697	94.2154411315581	121.562510108491	70.7615398331857	105.535917154395	90.0987631493618	83.5669228885018	70.3843731294822	94.2901823775822	-0.422346116862473	0.02110468057401	0.383837617599139	Fat4	3	38941089	39066134	+	17165	protein_coding	FAT atypical cadherin 4 [Source:MGI Symbol;Acc:MGI:3045256]	-	87	67	62	81	97	44	89	132	65	102	79	97	0.478121683756964	0.369881181882492	0.343815560787501	0.343340543823225	0.432672703292786	0.237193124899401	0.494529661642328	0.642768035204	0.373349953148724	0.550797232741579	0.468993829683536
ENSMUSG00000023885	269.975980936989	252.949454000253	377.668595846272	177.958916274323	259.073210899879	247.368549389379	561.058244940739	560.845217091445	517.103560319434	461.460971086866	139.139862078761	355.805558277848	264.165784557849	432.568902299182	-0.712284166577898	0.0211193788963092	0.383837617599139	Thbs2	17	14885762	14914497	-	7003	protein_coding	thrombospondin 2 [Source:MGI Symbol;Acc:MGI:98738]	-	257	241	355	217	304	239	530	609	475	446	122	413	3.46187986155997	3.261100311743	4.8252728227665	2.25454800559102	3.32369395945815	3.15796274761036	7.21834923124119	7.26870952977348	6.68738051660053	5.90318125145821	1.77525011623442
ENSMUSG00000121114	2.1009803963968	1.04958279668155	7.44698639696875	10.6611332330239	10.2265741144689	5.17507425500793	20.1134087808944	5.52556864129503	6.53183444614022	16.5546536712777	39.9171735471856	6.89211735162901	6.11005519875797	15.9224594064037	-1.34959456593102	0.0211732403472059	0.384079334957265	ENSMUSG00000121114	15	34081906	34082779	-	874	lncRNA	novel transcript	-	2	1	7	13	12	5	19	6	6	16	35	8	0.215864665080309	0.108422597886078	0.762367289924377	1.08222060699259	1.05123880516464	0.529360826515787	2.07342492479008	0.573804520713369	0.676840550515527	1.69685188675178	4.08075439602766
ENSMUSG00000026828	9.45441178378561	22.0412387303125	7.44698639696875	22.96244080959	9.37435960492982	4.14005940400634	23.2892101673514	34.9952680615352	16.3295861153505	22.7626487980069	26.2312854738648	18.0918080480262	12.5699161215988	23.6166344440225	-0.899569452020657	0.0212166975465663	0.3844993474994	Galnt5	2	57887896	57935872	+	4462	protein_coding	polypeptide N-acetylgalactosaminyltransferase 5 [Source:MGI Symbol;Acc:MGI:2179403]	-	9	21	7	28	11	4	22	38	15	22	23	21	0.190272462519242	0.445985737696343	0.149329675346012	0.456575228326772	0.188753359346572	0.0829513872478347	0.470261323148265	0.711833099579128	0.331442537623583	0.457012943725672	0.525269417102824
ENSMUSG00000038240	296.238235891949	373.651475618632	317.028849470955	284.570248604562	340.033589306091	376.745405764577	380.037565912689	398.761870280124	392.99870584277	376.618371021568	355.83308990634	387.681601029132	331.377967442794	381.988533998771	-0.207331785432171	0.0213485999130835	0.386201819308663	Pdss2	10	43097482	43340878	+	5963	protein_coding	prenyl (solanesyl) diphosphate synthase, subunit 2 [Source:MGI Symbol;Acc:MGI:1918615]	-	282	356	298	347	399	364	359	433	361	364	312	450	4.46115481075077	5.65739406283179	4.75695564062633	4.23397749258246	5.12318049597302	5.64845667967219	5.74216656179495	6.06942060561823	5.96882635852636	5.65811747278701	5.33179729639439
ENSMUSG00000029070	516.841177513613	463.915596133245	494.692667798638	379.700360530006	521.555279837914	433.671222569664	648.922083299383	710.035570406411	599.840129970543	476.980958903689	472.163138529567	483.309729282984	468.396050730513	565.208601732096	-0.271946072353417	0.0216328760016793	0.389803430751478	Mxra8	4	155924137	155928545	+	2918	protein_coding	matrix-remodelling associated 8 [Source:MGI Symbol;Acc:MGI:1922011]	-	492	442	465	463	612	419	613	771	551	461	414	561	15.9053346302011	14.3538440521505	15.1685934739139	11.5446184232308	16.0582311519564	13.2868478982207	20.0364756782833	22.0847881825901	18.6171356679212	14.6437067575974	14.4576896860968
ENSMUSG00000054517	167.027941513546	147.991174332098	156.386714336344	118.092552735034	178.112832493667	156.287242501239	207.485690581858	201.683255407268	251.475626176398	153.130546459319	163.090166207073	176.610507135493	153.983076318655	192.245965327902	-0.320935338368326	0.0218207615634052	0.392815192478867	Trim65	11	116012672	116021954	-	5883	protein_coding	tripartite motif-containing 65 [Source:MGI Symbol;Acc:MGI:2442815]	-	159	141	147	144	209	151	196	219	231	148	143	205	2.54953672000257	2.27117974297008	2.37846153990685	1.78093276211326	2.72006328381501	2.37504217979244	3.17763031138999	3.11149719790535	3.87132546052983	2.33183734122807	2.47697164189471
ENSMUSG00000024393	2721.82010353206	2912.5922607913	3122.41501072904	2591.47546279659	2760.32279639706	3131.9549391308	3617.23777917454	3369.67594308308	3551.14066055156	2942.58969006961	3153.45671022766	2820.59902615417	2873.43009556281	3242.44996821011	-0.174407310203541	0.0218986442603292	0.393469188806559	Prrc2a	17	35368052	35383873	-	7631	protein_coding	proline-rich coiled-coil 2A [Source:MGI Symbol;Acc:MGI:1915467]	-	2591	2775	2935	3160	3239	3026	3417	3659	3262	2844	2765	3274	32.0294111828707	34.4598018323942	36.6103852414234	30.1293323913231	32.4983315445476	36.6927868574535	42.7080430518089	40.0779135082263	42.1452908625598	34.5448669359838	36.9230465244563
ENSMUSG00000052516	8.40392158558721	4.1983311867262	5.31927599783482	4.10043585885536	3.4088580381563	5.17507425500793	9.52740415937105	24.8650588858276	9.79775166921033	13.4506561079131	2.28098134555346	9.47666135848989	5.1009828203613	11.5664189210609	-1.20476073514973	0.0220695197124749	0.395788413176941	Robo2	16	73688727	74208713	-	16983	protein_coding	roundabout guidance receptor 2 [Source:MGI Symbol;Acc:MGI:1890110]	-	8	4	5	5	4	5	9	27	9	13	2	11	0.0444363698475394	0.022319107472751	0.0280242011504742	0.0214209868355126	0.0180333807476868	0.0272426168742153	0.0505445397670077	0.132884247775168	0.0522485992890453	0.0709519487769891	0.0120005024928397
ENSMUSG00000032925	78.7867648648801	109.156610854881	115.960216752799	61.5065378828304	66.4727317440478	67.275965315103	145.02826331487	166.687987345733	194.86639430985	135.541226933586	47.9006082566228	74.9517761989655	83.1931379024236	127.496042726605	-0.618785336469206	0.0222544189295489	0.398081981456555	Itgbl1	14	123897383	124213030	+	4229	protein_coding	integrin, beta-like 1 [Source:MGI Symbol;Acc:MGI:2443439]	-	75	104	109	75	78	65	137	181	179	131	42	87	1.67296391534811	2.3303808128288	2.45338925926209	1.29034979697627	1.41217490000954	1.42222693565202	3.08979046489171	3.57737969377042	4.17312984811036	2.87123669782688	1.01203480977863
ENSMUSG00000026641	246.865196576624	187.875320605997	224.473447108629	218.143187691105	188.339406608135	189.40771773329	214.895893816925	232.994811041274	261.273377845609	250.389136778075	280.560705503076	245.531680651784	209.184046053964	247.607600939457	-0.242820992098472	0.0222604719802773	0.398081981456555	Usf1	1	171238881	171246710	+	2806	protein_coding	upstream transcription factor 1 [Source:MGI Symbol;Acc:MGI:99542]	bHLH	235	179	211	266	221	183	203	253	240	242	246	285	7.90029286543919	6.04500418705824	7.15768258854058	6.89727988365771	6.03026194383379	6.03471342227997	6.90008622512107	7.53627959308515	8.43276751461968	7.9939805074638	8.93369838268539
ENSMUSG00000087141	4.2019607927936	2.0991655933631	6.38313119740178	9.02095888948179	4.26107254769537	3.10504455300476	11.6446050836757	14.7348497101201	6.53183444614022	3.10399756336457	14.8263787460975	16.3687787101189	4.84522226229007	11.2017407099195	-1.19715727352932	0.0223008652293268	0.398428099729236	Plcxd2	16	45779626	45830581	-	7140	protein_coding	phosphatidylinositol-specific phospholipase C, X domain containing 2 [Source:MGI Symbol;Acc:MGI:3647874]	-	4	2	6	11	5	3	11	16	6	3	13	19	0.0528475398543951	0.0265437956729503	0.0799890769980679	0.112092963969261	0.0536171052587475	0.0388791060819158	0.146940197751229	0.187303511149761	0.0828513503012004	0.0389456026528638	0.185536340326796
ENSMUSG00000029478	1743.81372900935	1746.5057736781	1873.44900643742	1754.98654759009	1802.43368767514	1794.71575163675	2220.94376959561	2279.2970645342	2492.98348027685	2087.9556942899	1944.53659708433	1479.22068659338	1785.98408267114	2084.15621539571	-0.222391471494083	0.0223534872957559	0.398991840157422	Ncor2	5	125094217	125256283	-	10490	protein_coding	nuclear receptor co-repressor 2 [Source:MGI Symbol;Acc:MGI:1337080]	MYB	1660	1664	1761	2140	2115	1734	2098	2475	2290	2018	1705	1717	14.9277926923316	15.0317337768587	15.9794385001317	14.8430163121996	15.437126181561	15.2956111031058	19.0755093080687	19.7207697645555	21.523185386635	17.8312200424481	16.5627612102098
ENSMUSG00000030147	0	0	1.06385519956696	0	0.852214509539075	1.03501485100159	2.11720092430468	6.44649674817753	0	7.242660981184	2.28098134555346	1.72302933790725	0.491847426684604	3.30172822285449	-2.76766464629164	0.0224367560637721	0.400101022914987	Clec4b1	6	123026921	123048514	+	784	protein_coding	C-type lectin domain family 4, member b1 [Source:MGI Symbol;Acc:MGI:1917060]	-	0	0	1	0	1	1	2	7	0	7	2	2	0	0	0.121411991872067	0	0.0976597274355758	0.118025857748673	0.243310067704958	0.746287427237329	0	0.827594056373355	0.259954762545786
ENSMUSG00000063382	701.727452396532	605.609273685254	725.549246104669	614.245291656533	534.338497481	697.600009575068	829.942762327433	699.905361230703	783.820133536826	708.746110301577	756.145316050974	674.56598579069	646.511628483176	742.1876115397	-0.199776807584159	0.0225430000501743	0.401260069561699	Bcl9l	9	44394122	44423193	+	7998	protein_coding	B cell CLL/lymphoma 9-like [Source:MGI Symbol;Acc:MGI:1933114]	-	668	577	682	749	627	674	784	760	720	685	663	783	7.87876338729477	6.83637150146957	8.11672106902875	6.81372022883733	6.00230018705316	7.79779340436643	9.34933689517745	7.94248384676687	8.87559851688778	7.93861165353386	8.44726218637153
ENSMUSG00000032064	99.7965688288481	69.2724645809822	70.2144431714196	66.4270609134568	68.177160763126	54.855787103084	111.153048525996	105.906732291488	54.4319537178351	95.1892586098469	109.487104586566	100.797216267574	71.4572475601528	96.160885666551	-0.431481931400921	0.0225441289478111	0.401260069561699	Dixdc1	9	50574052	50650817	-	9971	protein_coding	DIX domain containing 1 [Source:MGI Symbol;Acc:MGI:2679721]	-	95	66	66	81	80	53	105	115	50	92	96	117	0.898768585980247	0.627243921017004	0.630061388770259	0.591058111997359	0.614303290016981	0.491847401581873	1.00437693177576	0.964013846436345	0.494399292239637	0.855233091652898	0.981106972632936
ENSMUSG00000087523	488.477942162256	548.93180266445	512.778206191276	471.550123768366	544.565071595469	630.324044259965	564.234046327196	515.719739854202	653.183444614022	611.487519982821	710.525689139904	659.058721749524	532.771198440297	619.034860277945	-0.216440109221977	0.0225876377482565	0.401363261920524	Gm12319	11	70545567	70547325	-	1110	lncRNA	predicted gene 12319 [Source:MGI Symbol;Acc:MGI:3649749]	-	465	523	482	575	639	609	533	560	600	591	623	765	39.5178191600399	44.6488165215516	41.3334547608575	37.6902263370844	44.0767383889775	50.7677062497751	45.7984074828857	42.1686012939867	53.2935712748262	49.3514466481668	57.1937948557492
ENSMUSG00000054978	345.611275207274	305.428593834331	222.345736709495	285.390335776333	239.47227718048	254.61365334639	374.744563601928	393.236301638829	268.893851366106	292.810436810725	347.849655196903	332.5446622161	275.476978675717	335.013245138432	-0.283644384183008	0.022627449335705	0.401363261920524	Kbtbd13	9	65295966	65298934	-	2969	protein_coding	kelch repeat and BTB (POZ) domain containing 13 [Source:MGI Symbol;Acc:MGI:1921742]	-	329	291	209	348	281	246	354	427	247	283	305	386	10.4531864239109	9.2878251972913	6.70060065348247	8.52811260092782	7.24648992690034	7.6668706732368	11.3720617969962	12.0210339913095	8.20225577434551	8.83510313600871	10.4682355708906
ENSMUSG00000032579	183.83578468472	161.635750688959	163.833700733312	187.799962335575	174.70397445551	152.147183097233	211.720092430468	188.790261910913	187.245920789353	186.239853801874	207.569302445365	228.301387272711	170.659392665885	201.644469775114	-0.239545561218551	0.0226330726891967	0.401363261920524	Hemk1	9	107204283	107215549	-	3646	protein_coding	HemK methyltransferase family member 1 [Source:MGI Symbol;Acc:MGI:1916786]	-	175	154	154	229	205	147	200	205	172	180	182	265	4.52777023094258	4.00253647423879	4.02051515377562	4.56985791820624	4.30495649847662	3.73073067850221	5.23190052333206	4.69960486269036	4.65112846397414	4.57605490304082	5.08672862837809
ENSMUSG00000078671	486.37696176586	549.981385461132	474.479419006866	596.203373877569	599.106800205969	540.277752222827	742.078923968789	745.030838467946	439.810186040108	590.794202893723	887.301743420298	602.198753598585	541.070948756704	667.869108064908	-0.30261321783856	0.0226347007989819	0.401363261920524	Chd2	7	73076386	73191578	-	14300	protein_coding	chromodomain helicase DNA binding protein 2 [Source:MGI Symbol;Acc:MGI:2448567]	-	463	524	446	727	703	522	701	809	404	571	778	699	3.05427367485063	3.47237396429893	2.96876942139542	3.69898229823496	3.76401077591416	3.37775148475027	4.67550070802663	4.72864414035803	2.78542763432204	3.70113951700621	5.5440534029485
ENSMUSG00000002274	511.588726522621	535.28722630759	529.799889384348	425.625242149186	501.102131608976	622.043925451953	645.746281912926	535.980158205618	557.383206070632	630.111505363008	632.972323391086	602.198753598585	520.907856904112	600.732038090309	-0.207004540409579	0.0226861860693634	0.401448636940743	Metrn	17	26012195	26016110	-	3771	protein_coding	meteorin, glial cell differentiation regulator [Source:MGI Symbol;Acc:MGI:1917333]	-	487	510	498	519	588	601	610	582	512	609	555	699	12.1824720651621	12.8157753332645	12.5704393557664	10.0137029691264	11.9385714850122	14.7472542448822	15.4283488171863	12.9000264272177	13.3862823419558	14.9691157245064	14.9975492281785
ENSMUSG00000059406	0	1.04958279668155	0	0.820087171771072	2.55664352861722	0	4.23440184860935	2.76278432064751	4.35455629742681	5.17332927227429	0	7.75363202058264	0.737718916178307	4.0464506265901	-2.39140212887189	0.0227326710021717	0.401596383805157	Tmprss9	10	80707682	80735326	+	3812	protein_coding	transmembrane protease, serine 9 [Source:MGI Symbol;Acc:MGI:3612246]	-	0	1	0	1	3	0	4	3	4	5	0	9	0	0.0248586963673748	0	0.0190867061609397	0.060255949351646	0	0.100081370976226	0.0657797942160919	0.103455516115875	0.121577301041206	0
ENSMUSG00000038055	452.761275423511	449.221436979703	377.668595846272	423.164980633873	477.240125341882	464.721668099712	526.124429689712	424.547857272835	586.776461078263	491.466280866057	678.591950302156	448.849142524839	440.796347054159	526.05935362231	-0.252617534165481	0.0228119691214168	0.40206059796936	Dexi	16	10320395	10360918	-	3353	protein_coding	dexamethasone-induced transcript [Source:MGI Symbol;Acc:MGI:1926236]	-	431	428	355	516	560	449	497	461	539	475	595	521	12.1256970098064	12.0959910636568	10.0779557345165	11.1969574485294	12.7875117009589	12.390990259844	14.1373816375039	11.4918915726566	15.848996300833	13.1309286606211	18.0828657370054
ENSMUSG00000063730	0	0	0	0	0	0	3.17580138645702	5.52556864129503	0	0	4.56196269110693	0.861514668953626	0	2.3541412313021	-3.71707561100949	0.0228226392869924	0.40206059796936	Hsd3b2	3	98616571	98631859	-	3695	protein_coding	hydroxy-delta-5-steroid dehydrogenase, 3 beta- and steroid delta-isomerase 2 [Source:MGI Symbol;Acc:MGI:96234]	-	0	0	0	0	0	0	3	6	0	0	4	1	0	0	0	0	0	0	0.0774377915077214	0.135725345359536	0	0	0.110313685432149
ENSMUSG00000031639	38.8681373333408	16.7933247469048	22.3409591909062	39.3641842450114	29.8275078338676	22.7703267220349	34.9338152510272	34.0743399546527	55.5205927921918	62.0799512672914	29.652757492195	45.6602774545422	28.3274066786776	43.6536223686501	-0.616503163417575	0.0229598063663885	0.403980960290118	Tlr3	8	45848702	45864117	-	5207	protein_coding	toll-like receptor 3 [Source:MGI Symbol;Acc:MGI:2156367]	-	37	16	21	48	35	22	33	37	51	60	26	53	0.67031222770953	0.291181411338375	0.383892266983237	0.670714258979085	0.514650071218014	0.390956403773595	0.604466878400487	0.593934146047914	0.965670914111744	1.06806838080064	0.508826376006654
ENSMUSG00000031790	489.528432360455	385.196886382129	430.86135582462	442.847072756379	594.845727658274	431.601192867661	585.406055570243	550.715007915738	610.72652071411	543.1995735888	562.261901678929	442.818539842164	462.480111308253	549.187933218331	-0.245315758184939	0.0230289130522151	0.404494571543565	Mmp15	8	96078896	96101708	+	5397	protein_coding	matrix metallopeptidase 15 [Source:MGI Symbol;Acc:MGI:109320]	-	466	367	405	540	698	417	553	598	561	525	493	514	8.14510137600229	6.44384207017653	7.14299345177299	7.27989677564778	9.90226569650269	7.14951966315697	9.77279659751898	9.26132049780384	10.248421891343	9.01658894103266	9.30847092654222
ENSMUSG00000001729	979.05686472091	772.49293835762	761.720322889946	932.439114303708	822.387001705207	800.066479824225	1057.54186169019	954.081518730275	922.077295980127	934.303266572736	897.566159475288	964.034914559108	844.693786966936	954.934169501287	-0.176550385729131	0.0230462373373908	0.404494571543565	Akt1	12	112620255	112641318	-	4098	protein_coding	thymoma viral proto-oncogene 1 [Source:MGI Symbol;Acc:MGI:87986]	-	932	736	716	1137	965	773	999	1036	847	903	787	1119	21.4539346638772	17.0191200601733	16.6310134615505	20.1870282229907	18.0296347946948	17.4542329485465	23.2508953132755	21.1306058460717	20.377833457562	20.4244881613899	19.5698106550574
ENSMUSG00000049382	2.1009803963968	0	0	0.820087171771072	2.55664352861722	1.03501485100159	3.17580138645702	2.76278432064751	0	6.20799512672914	17.107360091651	2.58454400686088	1.08545432463111	5.30641415539092	-2.24814417206572	0.0232403494461058	0.406394956426918	Krt8	15	101905133	101912917	-	1958	protein_coding	keratin 8 [Source:MGI Symbol;Acc:MGI:96705]	-	2	0	0	1	3	1	3	3	0	6	15	3	0.0963563418182791	0	0	0.0371596138332492	0.117311378410865	0.0472585661261285	0.146135158131272	0.128065666778214	0	0.284036366640906	0.780660880372431
ENSMUSG00000028184	172.280392504538	185.776155012634	162.769845533745	169.758044556612	217.314699932464	132.481900928203	240.302304908581	249.571516965159	157.852665781722	221.418492853339	201.866849081482	217.101696576314	173.396839744699	214.685587694433	-0.307567971477829	0.0232819828291909	0.406422378420417	Adgrl2	3	148521219	148696191	-	14198	protein_coding	adhesion G protein-coupled receptor L2 [Source:MGI Symbol;Acc:MGI:2139714]	-	164	177	153	207	255	128	227	271	145	214	177	252	1.0896315549356	1.18134660147771	1.02575089794606	1.0607842262501	1.37513260381183	0.834211218255728	1.52491217528229	1.59538780050059	1.00690241544387	1.39708228927712	1.2703691537172
ENSMUSG00000027716	78.7867648648801	60.8758022075299	60.6397463753169	48.3851431344932	53.6895141009617	53.8207722520824	67.7504295777497	55.2556864129503	57.6978709409053	113.813243990034	96.9417071860222	104.243274943389	59.3662904892107	82.6170355085084	-0.481204702540328	0.0232848389790977	0.406422378420417	Trpc3	3	36674631	36744316	-	5419	protein_coding	transient receptor potential cation channel, subfamily C, member 3 [Source:MGI Symbol;Acc:MGI:109526]	-	75	58	57	59	63	52	64	60	53	110	85	121	1.30558486768908	1.01423848164626	1.00122884162741	0.792166988234844	0.890129038106286	0.887927323989278	1.1264371615763	0.925457005173436	0.964280247923364	1.88152034960689	1.59839318841587
ENSMUSG00000009376	342.459804612679	353.709402481682	334.050532664027	381.340534873548	392.870888897513	345.694960234529	450.963796876896	487.170968540845	363.605450835139	372.479707603749	429.964983636828	385.958571691225	358.354353960663	415.023913197447	-0.210351492256505	0.0233423679012721	0.407051347434891	Met	6	17463799	17573979	+	7679	protein_coding	met proto-oncogene [Source:MGI Symbol;Acc:MGI:96969]	-	326	337	314	465	461	334	426	529	334	360	377	448	4.00475477492786	4.1586893001914	3.89226702840188	4.40587493251184	4.59650596805255	4.02471402612795	5.29116223807609	5.75804629365246	4.28833151331099	4.345434607758	5.00288509285927
ENSMUSG00000117696	0	0	0	0	0	0	0	3.68371242753002	3.26591722307011	3.10399756336457	3.4214720183302	0	0	2.24584987204915	-3.64368442768386	0.0233591270463577	1	Gm50100	19	56729045	56735345	-	1495	lncRNA	predicted gene, 50100 [Source:MGI Symbol;Acc:MGI:6302829]	-	0	0	0	0	0	0	0	4	3	3	3	0	0	0	0	0	0	0	0	0.223636633713929	0.197845699381462	0.186001072201637	0.204486154350397
ENSMUSG00000070583	65.1303922883009	92.3632861079763	62.7674567744509	50.8454046498064	67.3249462535869	65.2059356130999	92.0982402072534	84.7253858331904	81.6479305767527	82.7732683563886	84.3963097854782	91.3205549090844	67.2729036145369	86.160281611358	-0.363295889849851	0.0234763702566498	0.408260330505448	Fv1	4	147953436	147954815	+	1380	protein_coding	Friend virus susceptibility 1 [Source:MGI Symbol;Acc:MGI:95595]	-	62	88	59	62	79	63	87	92	75	80	74	106	4.23814292441007	6.04275278885077	4.06958920002489	3.26886121804429	4.38308179597813	4.22429939559598	6.01293228189122	5.57227945670539	5.35832102491459	5.37336430804729	5.46432445791895
ENSMUSG00000019932	97.6955884324513	61.9253850042114	64.8951671735848	31.9833996990718	67.3249462535869	13.4551930630206	176.786277179441	183.264693269618	163.295861153505	73.4612756662949	41.0576642199624	82.7054082195481	56.2132799376545	120.095196618062	-1.09639067924543	0.0235250733038739	0.408731961677766	Kera	10	97442741	97449554	+	2280	protein_coding	keratocan [Source:MGI Symbol;Acc:MGI:1202398]	-	93	59	61	39	79	13	167	199	150	71	36	96	3.84778765505652	2.45215775552347	2.54666978039024	1.24455369804148	2.65291792914466	0.527596290427401	6.98598696150761	7.29528692029192	6.48638860910714	2.88641576152672	1.60898316186234
ENSMUSG00000104273	10.504901981984	6.2974967800893	1.06385519956696	8.20087171771072	8.52214509539075	6.21008910600951	15.8790069322851	18.4185621376501	8.70911259485362	10.3466585445486	10.2644160549906	18.0918080480262	6.79989331345854	13.6182607187257	-0.999702463321142	0.023605976280453	0.409761667093693	A530064N14Rik	9	72594506	72595997	+	1492	TEC	RIKEN cDNA A530064N14 gene [Source:MGI Symbol;Acc:MGI:3028068]	-	10	6	1	10	10	6	15	20	8	10	9	21	0.632257765684284	0.381077817234984	0.0637982584636064	0.487657666792909	0.513171758106511	0.372113696279998	0.95888954296592	1.1204315261472	0.528649366533129	0.621250229985361	0.614691958620329
ENSMUSG00000049152	0	3.14874839004465	1.06385519956696	0	0.852214509539075	0	2.11720092430468	0.920928106882504	1.0886390743567	10.3466585445486	11.4049067277673	1.72302933790725	0.844136349858448	4.60022711929451	-2.46743593259419	0.0237250051012916	0.411006320794377	Ugt3a2	15	9335636	9371041	+	3102	protein_coding	UDP glycosyltransferases 3 family, polypeptide A2 [Source:MGI Symbol;Acc:MGI:2145969]	-	0	3	1	0	1	0	2	1	1	10	10	2	0	0.0916454067238226	0.030685687178498	0	0.0246825358831372	0	0.0614942272987385	0.0269452584947069	0.0317837223914985	0.298808943629322	0.328505051315113
ENSMUSG00000109628	2.1009803963968	0	0	0	0	2.07002970200317	7.41020323506637	1.84185621376501	1.0886390743567	0	23.9503041283114	0	0.695168349733329	5.71516710858324	-3.07197816121411	0.0237450031936706	0.411006320794377	BC024386	7	140485908	140487904	+	1707	lncRNA	cDNA sequence BC023486 [Source:MGI Symbol;Acc:MGI:2669313]	-	2	0	0	0	0	2	7	2	1	0	21	0	0.110524731857171	0	0	0	0	0.108415081985893	0.391120577494086	0.0979310976573882	0.0577581176675035	0	1.2536307002208
ENSMUSG00000101932	11.5553921801824	12.5949935601786	15.9578279935045	2.46026151531322	6.8177160763126	19.6652821690301	28.5822124781131	20.2604183514151	22.8614205614908	12.4159902534583	20.5288321099812	21.5378667238407	11.5085789157536	21.0311234130499	-0.892386812792093	0.0237644905095492	0.411006320794377	Gm10074	17	36536915	36537163	+	249	processed_pseudogene	predicted gene 10074 [Source:MGI Symbol;Acc:MGI:3708632]	-	11	12	15	3	8	19	27	22	21	12	18	25	4.16731504032549	4.56681207481603	5.73415672456029	0.876608721512072	2.45992694970254	7.06069549005716	10.3421436007601	7.38494867756136	8.31508130131325	4.46701370187064	7.36642893382756
ENSMUSG00000052921	336.156863423488	286.536103494063	269.155365490442	307.532689414152	299.979507357754	180.092584074276	416.029981625869	416.259504310892	390.821427694056	262.805127031534	315.915916359155	310.145280823305	279.908852209029	351.996206307469	-0.329718642703558	0.0238363672565227	0.411123062936272	Arhgef15	11	68833981	68848306	-	6483	protein_coding	Rho guanine nucleotide exchange factor (GEF) 15 [Source:MGI Symbol;Acc:MGI:3045246]	-	320	273	253	375	352	174	393	452	359	254	277	360	4.65625709776808	3.9904131884643	3.71468631988405	4.2086142923127	4.15717409547139	2.48351309743066	5.78179481572651	5.82755741423146	5.45965222307201	3.63155880236144	4.35399166069282
ENSMUSG00000027889	96.6450982342529	88.1649549212501	119.1517823515	122.19298859389	110.78788624008	121.096737567185	130.207856844738	135.376431711728	158.941304856079	101.397253736576	168.792619570956	133.534773687812	109.673241318026	138.041706734648	-0.327617443032569	0.0239044609080436	0.411922366402665	Ampd2	3	107981378	107993967	-	5224	protein_coding	adenosine monophosphate deaminase 2 [Source:MGI Symbol;Acc:MGI:88016]	-	92	84	112	149	130	117	123	147	146	98	148	155	1.66129842934318	1.52372768882166	2.04076266889404	2.07523354880165	1.90533679560373	2.07241115611988	2.24568113025694	2.35200539855195	2.75547350714597	1.73883467893452	2.8869708085483
ENSMUSG00000038059	3.1514705945952	11.545410763497	7.44698639696875	18.8620049507347	11.078788624008	6.21008910600951	17.9962078565898	24.8650588858276	10.886390743567	22.7626487980069	13.6858880733208	20.676352054887	9.71579173930219	18.4787577353665	-0.910612049187852	0.0240944531659829	0.413102595149247	Smim3	18	60607263	60635059	-	6828	protein_coding	small integral membrane protein 3 [Source:MGI Symbol;Acc:MGI:1917088]	-	3	11	7	23	13	6	17	27	10	22	12	24	0.041446774446439	0.152661812547856	0.0975847995597401	0.245085830311445	0.14577444962264	0.0813113114894196	0.237466064907123	0.330517454593685	0.144395294168759	0.298651399370818	0.179090100031543
ENSMUSG00000097378	0	2.0991655933631	0	0	0.852214509539075	0	3.17580138645702	0	0	3.10399756336457	6.84294403666039	10.3381760274435	0.491896683817029	3.91015316898758	-3.0088643464586	0.0241255023909064	0.413102595149247	B230208H11Rik	10	12792387	12798860	-	1174	lncRNA	RIKEN cDNA B230208H11 gene [Source:MGI Symbol;Acc:MGI:2443719]	-	0	2	0	0	1	0	3	0	0	3	6	12	0	0.161433305881486	0	0	0.0652173989007593	0	0.243724565264932	0	0	0.236858264856429	0.520795231267196
ENSMUSG00000092008	0	0	0	0	0	0	4.23440184860935	5.52556864129503	0	0	6.84294403666039	0	0	2.76715242109413	-3.94636511078914	0.0241526664338639	0.413191686472009	Cyp2c69	19	39831258	39875243	-	1708	protein_coding	cytochrome P450, family 2, subfamily c, polypeptide 69 [Source:MGI Symbol;Acc:MGI:3721049]	-	0	0	0	0	0	0	4	6	0	0	6	0	0	0	0	0	0	0	0.22336661953242	0.293621282847474	0	0	0.357970492686
ENSMUSG00000049504	213.249510234275	209.91655933631	212.771039913393	204.201705770997	172.147330926893	199.757866243306	238.185103984276	211.813464582976	236.234679135405	265.909124594898	240.643531955891	221.409269921082	202.007335404196	235.699195695755	-0.22300574301944	0.0242101535203327	0.4134282122345	Proser1	3	53371087	53389176	+	6114	protein_coding	proline and serine rich 1 [Source:MGI Symbol;Acc:MGI:1919933]	-	203	200	200	249	202	193	225	230	217	257	211	257	3.13208542753342	3.09981519635043	3.11373901300951	2.96317835254989	2.52963292681015	2.92095658941236	3.5099685920146	3.14431863356781	3.4992973811382	3.89621644073449	3.51674490017779
ENSMUSG00000021702	1232.22500248672	1365.5072184827	1079.81302756047	1133.36047138762	1167.53387806853	887.007727308358	2428.42946017746	2726.8681244791	3731.85474689478	1764.10528184553	622.707907336096	1008.8336773447	1144.2412208824	2047.13319967961	-0.839200201690969	0.0242827234294523	0.413548755671734	Thbs4	13	92888098	92931326	-	3289	protein_coding	thrombospondin 4 [Source:MGI Symbol;Acc:MGI:1101779]	-	1173	1301	1015	1382	1370	857	2294	2961	3428	1705	546	1171	33.6431873471668	37.4838908691744	29.3751312411421	30.572295533525	31.8924779702047	24.1107198270114	66.5235912932648	75.2486445939707	102.759857193887	48.0502769854229	16.9165818598965
ENSMUSG00000068246	6.3029411891904	0	6.38313119740178	0.820087171771072	2.55664352861722	5.17507425500793	11.6446050836757	18.4185621376501	3.26591722307011	9.31199269009372	17.107360091651	1.72302933790725	3.53964622366473	10.2452444273413	-1.55143559688087	0.0243593352700451	0.414108699590768	Apol9b	15	77613239	77620582	+	1821	protein_coding	apolipoprotein L 9b [Source:MGI Symbol;Acc:MGI:1919148]	-	6	0	6	1	3	5	11	20	3	9	15	2	0.310816667677414	0	0.31363097735651	0.0399552574879198	0.126137110888783	0.254069940897747	0.57614113780548	0.918003205388037	0.162426864676159	0.458108077333521	0.839392643475683
ENSMUSG00000030551	289.935294702759	311.72609061442	338.305953462294	256.687284764345	317.876012058075	302.224336492463	382.154766836994	349.031752508469	334.212195827508	302.122429500818	371.799959325215	356.667072946801	302.792495349059	349.331362824301	-0.207848922320605	0.0246136844596257	0.416722935136005	Nr2f2	7	70001692	70016483	-	8625	protein_coding	nuclear receptor subfamily 2, group F, member 2 [Source:MGI Symbol;Acc:MGI:1352452]	RXR-like	276	297	318	313	373	292	361	379	307	292	326	414	3.01865147648305	3.26308650597942	3.50950336436045	2.64039628709126	3.31116862764525	3.13268678987689	3.99203412186249	3.67285898102842	3.5093430499174	3.13804475589962	3.85161032060881
ENSMUSG00000022129	4.2019607927936	0	0	0.820087171771072	0	2.07002970200317	3.17580138645702	0.920928106882504	5.44319537178351	4.13866341781943	7.98343470943713	7.75363202058264	1.18201294442797	4.90260916882704	-2.08411048120991	0.0246231367840949	0.416722935136005	Dct	14	118250202	118289656	-	5895	protein_coding	dopachrome tautomerase [Source:MGI Symbol;Acc:MGI:102563]	-	4	0	0	1	0	2	3	1	5	4	7	9	0.0640087251162648	0	0	0.0123424128728587	0	0.031393476666653	0.0485381916235845	0.0141788281341104	0.0836243484804313	0.0628943405013169	0.121003540021312
ENSMUSG00000034714	190.138725873911	188.924903402679	188.302370323353	118.092552735034	177.260617984128	196.652821690301	195.841085498183	239.441307789451	152.409470409938	267.978456303808	229.238625228123	248.977739327598	176.561998668234	222.314447426184	-0.337129424887024	0.0247315733212524	0.417561618799372	Ttyh2	11	114566257	114611803	+	3739	protein_coding	tweety family member 2 [Source:MGI Symbol;Acc:MGI:2157091]	-	181	180	177	144	208	190	185	260	140	259	201	289	4.56652779188479	4.56192647751748	4.50604420649988	2.80214694825148	4.2593118674443	4.70209461627235	4.71913509226091	5.81221981309201	3.69163812788981	6.42066017311535	5.4780303959635
ENSMUSG00000120880	79.8372550630785	89.2145377179317	76.5975743688214	57.406102023975	125.275532902244	131.446886077201	146.086863777023	92.0928106882504	119.750298179237	135.541226933586	125.453974005441	136.119317694673	93.2963146922086	125.840748546368	-0.431687208056729	0.0247804425083859	0.417891380430821	ENSMUSG00000120880	11	70545947	70546525	+	579	lncRNA	novel transcript	-	76	85	72	70	147	127	138	100	110	131	110	158	12.3822059700298	13.9114245197872	11.8367255910094	8.79636730912805	19.4388398402336	20.2963706464937	22.7324722324135	14.4359571417238	18.7309874860572	20.9714334975991	19.3596707443424
ENSMUSG00000049957	115.553921801824	94.4624517013394	81.9168503666562	113.172029704408	94.5958105588373	125.236796971192	99.5084434423198	143.664784673671	131.725327997161	142.78388791477	140.280352751538	123.196597660369	104.156310184043	130.193232406638	-0.321285260860286	0.0248089699862677	0.418000243416315	Ccdc137	11	120348941	120355184	+	3803	protein_coding	coiled-coil domain containing 137 [Source:MGI Symbol;Acc:MGI:1914541]	-	110	90	77	138	111	121	94	156	121	138	123	143	2.72853390754943	2.24257732046251	1.92726771636418	2.6401988683143	2.23474628460519	2.94409807243495	2.35747814220149	3.42864420949004	3.13693555873517	3.3634745556946	3.2958135237727
ENSMUSG00000020099	91.3926472432609	51.4295570373959	53.1927599783482	55.7659276804329	92.0391670302201	53.8207722520824	104.801445753081	138.139216032376	64.2297053870455	81.7386025019337	87.8177818038084	80.9823788816409	66.2734718702901	92.9515217266476	-0.488003814005115	0.0248608778415027	0.418451667286263	Unc5b	10	60598372	60667360	-	6258	protein_coding	unc-5 netrin receptor B [Source:MGI Symbol;Acc:MGI:894703]	-	87	49	50	68	108	52	99	150	59	79	77	94	1.31143475578272	0.741979254884819	0.760522544165075	0.790600770887526	1.32135577523571	0.768884335042809	1.50884901046564	2.0034561805029	0.929529131455302	1.17011061214309	1.25383102471748
ENSMUSG00000111556	79.8372550630785	101.80953127811	72.3421535705535	104.971157986697	109.083457221002	98.3264108451506	116.446050836757	108.669516612136	142.611718740728	88.9812634831177	126.594464678217	139.565376370487	94.3949943274319	120.478065120241	-0.347787785407165	0.0249890426170309	0.419304022122012	Gm19299	9	67040842	67121798	+	2401	lncRNA	predicted gene, 19299 [Source:MGI Symbol;Acc:MGI:5011484]	-	76	97	68	128	128	95	110	118	131	86	111	162	2.98596303900343	3.82834277533776	2.69584177871039	3.87883842454988	4.08177799567468	3.66121028118332	4.36965019551761	4.10784449744629	5.37929904142196	3.32002746813334	4.71101692123791
ENSMUSG00000060675	2216.53431819863	1991.0585653049	2063.87908715991	2302.80477833317	2103.26540954244	1898.21723673691	2418.90205601809	2441.38041134552	2068.41424127774	2318.68617983333	2330.02244448286	2293.35204875455	2095.95989921266	2311.79289695202	-0.141113786801262	0.025029395440531	0.419304022122012	Plaat3	19	7534824	7565910	+	6396	protein_coding	phospholipase A and acyltransferase 3 [Source:MGI Symbol;Acc:MGI:2179715]	-	2110	1897	1940	2808	2468	1834	2285	2651	1900	2241	2043	2662	31.1198142167919	28.105422451214	28.8716046212851	31.9427665838789	29.5439303520677	26.5328623700869	34.0740609513266	34.6437918380065	29.2881336821473	32.4764676981334	32.5494576787629
ENSMUSG00000114540	15.757352972976	12.5949935601786	20.2132487917723	9.02095888948179	14.4876466621643	13.4551930630206	21.1720092430468	24.8650588858276	31.5705331563444	18.6239853801874	28.5122668194183	14.6457493722116	14.2548989899323	23.2316004761727	-0.706704114609109	0.0252153793917153	0.421108454254252	Gm6421	13	117494748	117495156	-	409	processed_pseudogene	predicted pseudogene 6421 [Source:MGI Symbol;Acc:MGI:3647311]	-	15	12	19	11	17	13	20	27	29	18	25	17	3.45964029242403	2.78028412378775	4.42189005116458	1.956830715747	3.18241771946542	2.94112357499872	4.66393870612926	5.51778283610191	6.99070928825043	4.07929001870094	6.22874492163496
ENSMUSG00000028069	233.208824000045	243.503208830119	243.622840700835	259.147546279659	317.023797548536	258.753712750396	288.997926167588	317.720196874464	314.616692489087	275.221117284992	320.477879050262	293.776502113187	259.209988351598	301.801718996597	-0.216019124591025	0.0252508622667717	0.421108454254252	Gpatch4	3	87950415	87963300	+	2447	protein_coding	G patch domain containing 4 [Source:MGI Symbol;Acc:MGI:1913864]	-	222	232	229	316	372	250	273	345	289	266	281	341	8.55819150719294	8.98432093508964	8.90797849315222	9.39586986016291	11.639666606919	9.45364451113196	10.6408133246889	11.7844487897223	11.6442206301945	10.0758815396302	11.7018949750484
ENSMUSG00000001670	1.0504901981984	1.04958279668155	4.25542079826785	0.820087171771072	0	8.28011880801268	6.35160277291403	0.920928106882504	0	2.06933170890971	44.4791362382926	16.3687787101189	2.57594996215526	11.6982962561863	-2.1995920952301	0.0252568061027154	0.421108454254252	Tat	8	110717069	110726435	+	2405	protein_coding	tyrosine aminotransferase [Source:MGI Symbol;Acc:MGI:98487]	-	1	1	4	1	0	8	6	1	0	2	39	19	0.0392236418461934	0.0394018089615104	0.158315179422371	0.0302530244846162	0	0.307799658960364	0.23794814105699	0.0347543417258132	0	0.0770815254168946	1.65246919326402
ENSMUSG00000029817	373.974510558631	329.568998158006	359.583057453634	282.109987089249	362.191166554107	300.15430679046	370.510161753318	395.078157852594	399.53054028891	415.935673490853	328.461313759699	416.973099773555	334.597004434014	387.748157819822	-0.215352617014073	0.0252948524337472	0.421108454254252	Tra2a	6	49220858	49240967	-	6945	protein_coding	transformer 2 alpha [Source:MGI Symbol;Acc:MGI:1933972]	-	356	314	338	344	425	290	350	429	367	402	288	484	4.83549282589977	4.28438647566074	4.63257113753245	3.60387792895791	4.68541701677953	3.86383859146699	4.80664381412818	5.16308398904236	5.21003170871753	5.36524043112368	4.22575275340087
ENSMUSG00000098055	0	0	0	0.820087171771072	0	0	1.05860046215234	2.76278432064751	0	2.06933170890971	4.56196269110693	2.58454400686088	0.136681195295179	2.1728705316129	-3.121844715475	0.0253407145411687	0.421108454254252	Gm26947	10	60767766	60787422	+	3397	lncRNA	predicted gene, 26947 [Source:MGI Symbol;Acc:MGI:5504062]	-	0	0	0	1	0	0	1	3	0	2	4	3	0	0	0	0.0214184644938187	0	0	0.0280769933883849	0.0738158891821438	0	0.0545719954747223	0.119990894221899
ENSMUSG00000038160	176.482353297331	181.577823825908	187.238515123786	150.075952434106	169.590687398276	167.672405862257	176.786277179441	190.632118124678	226.436927466194	215.21049772661	195.023905044821	208.486549886778	172.106289656944	202.096045904754	-0.23469292376611	0.0253922948926656	0.421108454254252	Atg5	10	44144354	44240287	+	2352	protein_coding	autophagy related 5 [Source:MGI Symbol;Acc:MGI:1277186]	-	168	173	176	183	199	162	167	207	208	208	171	242	6.73806133143537	6.97011634590597	7.12283685649462	5.66105861864238	6.47809525322653	6.37339631842834	6.77213021778799	7.35626178276795	8.71911829360252	8.19712208217419	7.40871073255489
ENSMUSG00000026222	200.643627855895	140.644094755328	180.855383926384	143.515255059938	192.600479155831	173.882494968266	214.895893816925	267.990079102809	193.777755235493	173.823863548416	209.850283790919	200.732917866195	172.023555953607	210.178465560126	-0.291189764272838	0.0255581286115328	0.423126536975329	Sp100	1	85577709	85637719	+	7556	protein_coding	nuclear antigen Sp100 [Source:MGI Symbol;Acc:MGI:109561]	SAND	191	134	170	175	226	168	203	291	178	168	184	233	2.38453890951008	1.68052156882292	2.14158156123731	1.68511668607237	2.29006632423836	2.05736127260365	2.56241952722204	3.21903121076218	2.32260098210697	2.06088006415048	2.48147394294632
ENSMUSG00000073988	3.1514705945952	5.24791398340775	7.44698639696875	4.10043585885536	0	4.14005940400634	16.9376073944374	5.52556864129503	2.17727814871341	3.10399756336457	42.1981548927391	5.16908801372176	4.01447770630557	12.5186157757119	-1.64482040419438	0.0255806340467296	0.423126536975329	Ttpa	4	20007938	20030785	+	3488	protein_coding	tocopherol (alpha) transfer protein [Source:MGI Symbol;Acc:MGI:1354168]	-	3	5	7	5	0	4	16	6	2	3	37	6	0.0811349128211828	0.135839091961629	0.19102895968862	0.104298342725777	0	0.106114991370366	0.437511681377722	0.143780146531962	0.0565327447582732	0.0797223632286259	1.08095868003557
ENSMUSG00000038175	363.469608576647	293.883183070834	337.242098262727	324.754520021344	370.713311649497	324.994663214498	388.506369609908	427.310641593482	375.580480653062	449.044980833408	322.758860395815	373.03585165692	335.842897465925	389.372864123766	-0.213800738652374	0.0257243162603286	0.423776285753527	Mylip	13	45543218	45565498	+	3233	protein_coding	myosin regulatory light chain interacting protein [Source:MGI Symbol;Acc:MGI:2388271]	-	346	280	317	396	435	314	367	464	345	434	283	433	10.0956291646993	8.20698365440183	9.33321358366259	8.91196271532904	10.3018476475808	8.98705028058686	10.8269593505432	11.995999077844	10.5210707906458	12.4428369601596	8.91999428944611
ENSMUSG00000057967	3.1514705945952	8.39666237345239	0	5.7406102023975	2.55664352861722	7.2451039570111	29.6408129402655	9.20928106882504	14.1523079666371	13.4506561079131	7.98343470943713	0.861514668953626	4.51508177601224	12.5496679103386	-1.46808511945492	0.0257809050313671	0.424186602505673	Fgf18	11	33067430	33097400	-	1187	protein_coding	fibroblast growth factor 18 [Source:MGI Symbol;Acc:MGI:1277980]	-	3	8	0	7	3	7	28	10	13	13	7	1	0.238414975501504	0.638661166317995	0	0.4290730136466	0.193509417799894	0.545683156971118	2.24984945503759	0.704163368581136	1.07978971285558	1.01514485769133	0.600940074495059
ENSMUSG00000028927	4101.11373376656	4903.6508260962	3718.17392248654	4526.06110100454	3035.58808297818	3298.59233014205	5397.80375651477	5487.81058891284	4051.91463475565	4269.03131548074	4679.43323040293	4211.08370184533	3930.52999941235	4682.84620465204	-0.252716668135414	0.0259154433177524	0.4257766567281	Padi2	4	140633655	140679897	+	5013	protein_coding	peptidyl arginine deiminase, type II [Source:MGI Symbol;Acc:MGI:1338892]	-	3904	4672	3495	5519	3562	3187	5099	5959	3722	4126	4103	4888	73.4640893937625	88.3153859527159	66.3631698960332	80.10259192581	54.4036178165587	58.8271199636338	97.0137861179356	99.3573108393399	73.2023825507821	76.2898752401364	83.4041494443129
ENSMUSG00000000056	2794.30392720775	3327.17746548051	2947.94275800006	3251.6456360723	3220.51863154816	3135.0599836838	3457.38910938954	3789.61915982151	3646.94089909495	3210.56814637342	3453.40575716795	3103.17583757096	3112.77473366543	3443.51648490305	-0.145348270762381	0.0259810290528328	0.425944943230568	Narf	11	121128079	121146682	+	4806	protein_coding	nuclear prelamin A recognition factor [Source:MGI Symbol;Acc:MGI:1914858]	-	2660	3170	2771	3965	3779	3029	3266	4115	3350	3103	3028	3602	52.2108622519046	62.5038454538517	54.8820602393589	60.0265391606358	60.2039097427316	58.3188209169065	64.8154529756059	71.5665729224178	68.7238676603694	59.8457611268769	64.2030928480121
ENSMUSG00000084786	543.103432468573	480.70892088015	523.416758186946	492.052303062643	563.313790805328	545.452826477835	566.351247251501	544.26851116756	625.967467755104	546.303571152165	610.162509935552	639.243884363591	524.674671980246	588.716198604245	-0.166128289903932	0.0260254939091827	0.425944943230568	Ubl5	9	20554174	20558436	+	3468	protein_coding	ubiquitin-like 5 [Source:MGI Symbol;Acc:MGI:1913427]	-	517	458	492	600	661	527	535	591	575	528	535	742	14.0628857891953	12.5146189599233	13.5040382932032	12.5879799109865	14.5933144724838	14.0612766996262	14.713664186587	14.2440188534294	16.3468963216829	14.1120536671553	15.7202170706754
ENSMUSG00000029530	0	8.39666237345239	2.12771039913393	0	0	0	8.46880369721871	8.28835296194254	6.53183444614022	7.242660981184	5.70245336388366	3.44605867581451	1.75406212876439	6.61336068769727	-1.96219547489701	0.0260653287992231	0.425944943230568	Ccr9	9	123507504	123613395	+	10260	protein_coding	chemokine (C-C motif) receptor 9 [Source:MGI Symbol;Acc:MGI:1341902]	-	0	8	2	0	0	0	8	9	6	7	5	4	0	0.0738879926334757	0.0185549710775245	0	0	0	0.0743684573413984	0.0733194665355972	0.0576567876365079	0.0632391559645916	0.0496599741315536
ENSMUSG00000008874	0	0	2.12771039913393	0	0	0	0	2.76278432064751	6.53183444614022	8.27732683563886	0	1.72302933790725	0.354618399855655	3.21582915672231	-3.20468941085109	0.0260931011538624	0.425992370389523	Clec3a	8	115144826	115152586	+	591	protein_coding	C-type lectin domain family 3, member a [Source:MGI Symbol;Acc:MGI:2685642]	-	0	0	2	0	0	0	0	3	6	8	0	2	0	0	0.322121832919461	0	0	0	0	0.424285237820207	1.00094524729369	1.25469420390952	0
ENSMUSG00000038406	1070.44951196417	1023.34322676451	1201.0925203111	1173.5447428044	1081.46021260509	1261.68310337093	1340.18818508486	1208.25767622985	1356.44428664845	1184.69240335081	1268.22562812773	1212.15113921775	1135.2622196367	1261.65988644324	-0.151813856810788	0.0261382665113769	0.426362180182993	Scaf1	7	44652372	44665787	-	5930	protein_coding	SR-related CTD-associated factor 1 [Source:MGI Symbol;Acc:MGI:2141980]	-	1019	975	1129	1431	1269	1219	1266	1312	1246	1145	1112	1407	16.2099802621007	15.5804918699194	18.1224493824071	17.5577483440394	16.3847002001256	19.0213895694731	20.3622215716821	18.4928262576664	20.7161907496799	17.8972448211331	19.1088230712914
ENSMUSG00000057134	611.385295351469	696.922976996549	679.80347252329	671.651393680508	617.00330490629	699.670039277072	760.075131825379	763.449400605596	760.958712975335	662.186146851109	723.071086540448	737.456556624304	662.739413789196	734.532839237029	-0.14915866070501	0.0262099746824699	0.426796647065017	Ado	10	67380341	67384898	-	4558	protein_coding	2-aminoethanethiol (cysteamine) dioxygenase [Source:MGI Symbol;Acc:MGI:2685083]	-	582	664	639	819	724	676	718	829	699	640	634	856	12.0451346486475	13.8046372897796	13.3445577095438	13.0735478416468	12.1617428363475	13.7235226399896	15.0243699903393	15.2021270390811	15.1199170017643	13.0149060905753	14.1742073773539
ENSMUSG00000032112	114.503431603626	138.544929161964	130.854189546737	131.213947483371	100.561312125611	137.656975183211	182.079279490202	125.246222536021	187.245920789353	135.541226933586	159.668694188743	142.149920377348	125.55579751742	155.321877385875	-0.30566369130084	0.0263750157149007	0.428012037368285	Trappc4	9	44314995	44318897	-	2444	protein_coding	trafficking protein particle complex 4 [Source:MGI Symbol;Acc:MGI:1926211]	-	109	132	123	160	118	133	172	136	172	131	140	165	4.20715286078984	5.11804348319194	4.79050785605859	4.76324215289702	3.69668441265139	5.03551237281899	6.71233142591615	4.65116615862479	6.93863108823637	4.96827332042139	5.83728206567623
ENSMUSG00000062391	0	0	0	1.64017434354214	0	0	1.05860046215234	0	1.0886390743567	10.3466585445486	2.28098134555346	3.44605867581451	0.273362390590357	3.03682301707093	-3.12232976902513	0.0264730953761134	0.429235856363728	4932435O22Rik	11	114304227	114339686	-	3496	lncRNA	RIKEN cDNA 4932435O22 gene [Source:MGI Symbol;Acc:MGI:2442791]	-	0	0	0	2	0	0	1	0	1	10	2	4	0	0	0	0.0416238694997151	0	0	0.0272819069051326	0	0.0282016896048136	0.265133107304965	0.0582964913718238
ENSMUSG00000099411	404.438726306384	410.386873502486	347.880650258397	276.369376886851	441.447115941241	254.61365334639	462.608401960572	432.836210234777	455.051133081102	356.959719786926	520.06374678619	401.46583573239	355.856066040291	438.164174596993	-0.299557434128917	0.0265481698155439	0.429734573672271	2310015D24Rik	16	13331995	13338971	-	4222	lncRNA	RIKEN cDNA 2310015D24 gene [Source:MGI Symbol;Acc:MGI:1917350]	-	385	391	327	337	518	246	437	470	418	345	456	466	8.60211998494473	8.77586169256303	7.37237080347185	5.80758468721321	9.39383875611477	5.39150616504975	9.87209565090718	9.30473002600023	9.76123132800168	7.57419098490441	11.0060240915642
ENSMUSG00000022483	10.504901981984	9.44624517013394	6.38313119740178	4.10043585885536	5.11328705723445	1.03501485100159	19.0548083187421	23.9441307789451	25.0386987102042	6.20799512672914	6.84294403666039	4.30757334476813	6.09716935276852	14.2326917193415	-1.23129133155332	0.0266491486898411	0.429734573672271	Col2a1	15	97873483	97902576	-	9243	protein_coding	collagen, type II, alpha 1 [Source:MGI Symbol;Acc:MGI:88452]	-	10	9	6	5	6	1	18	26	23	6	6	5	0.10205870241274	0.0922700589604991	0.0617896797323601	0.0393587168048805	0.049701542557281	0.0100110648571849	0.185740110107777	0.235117276654236	0.245336087606173	0.0601691232157194	0.0661488263018163
ENSMUSG00000059602	9.45441178378561	8.39666237345239	8.51084159653571	7.38078454593965	7.66993058585167	5.17507425500793	7.41020323506637	12.8929934963551	27.2159768589176	13.4506561079131	12.5453974005441	13.784234703258	7.76461752342883	14.5499103003424	-0.905019401729912	0.0266819877016375	0.429734573672271	Syn3	10	85890989	86334760	-	12282	protein_coding	synapsin III [Source:MGI Symbol;Acc:MGI:1351334]	-	9	8	8	9	9	5	7	14	25	13	11	16	0.0691252017392002	0.061723726137393	0.0620009780997888	0.0533159676737924	0.0561054418486747	0.0376698715498126	0.0543594549570432	0.0952759066852411	0.200686180708412	0.0981091797817623	0.0912656681401586
ENSMUSG00000000791	0	0	0	0	0	0	2.11720092430468	7.36742485506003	3.26591722307011	1.03466585445486	0	0	0	2.29753480948161	-3.68747079818216	0.0267080786361951	0.429734573672271	Il12rb1	8	71261093	71274068	+	4105	protein_coding	interleukin 12 receptor, beta 1 [Source:MGI Symbol;Acc:MGI:104579]	-	0	0	0	0	0	0	2	8	3	1	0	0	0	0	0	0	0	0	0.0464689629916412	0.16289245671246	0.0720534276675482	0.0225799109168857	0
ENSMUSG00000021210	0	3.14874839004465	0	0	0	3.10504455300476	5.29300231076169	0	1.0886390743567	3.10399756336457	43.3386455655158	10.3381760274435	1.04229882384157	10.5270767569071	-3.35800154157531	0.0268593733628652	0.430705175906809	Akr1c6	13	4484305	4507876	+	2033	protein_coding	aldo-keto reductase family 1, member C6 [Source:MGI Symbol;Acc:MGI:1933427]	-	0	3	0	0	0	3	5	0	1	3	38	12	0	0.139834752413821	0	0	0	0.136545409456409	0.234573405165626	0	0.0484963634325767	0.136778948815272	1.90471526949435
ENSMUSG00000057074	0	1.04958279668155	0	0	0	0	4.23440184860935	0	0	0	10.2644160549906	3.44605867581451	0.174930466113592	2.99081276323574	-3.57360079314386	0.0269938691732788	0.432495680544462	Ces1g	8	94028997	94063936	-	2388	protein_coding	carboxylesterase 1G [Source:MGI Symbol;Acc:MGI:88378]	-	0	1	0	0	0	0	4	0	0	0	9	4	0	0.0396823076015212	0	0	0	0	0.159761384489688	0	0	0	0.384053769791261
ENSMUSG00000108126	4.2019607927936	10.4958279668155	1.06385519956696	5.7406102023975	5.11328705723445	2.07002970200317	23.2892101673514	22.1022745651801	3.26591722307011	5.17332927227429	12.5453974005441	6.03060268267538	4.78092848680186	12.0677885518492	-1.33113280090116	0.0270370283246015	0.432820999502369	Gm43909	6	145809023	145810898	+	1876	TEC	predicted gene, 43909 [Source:MGI Symbol;Acc:MGI:5690301]	-	4	10	1	7	6	2	22	24	3	5	11	7	0.201136159147325	0.505124469895696	0.0507393398868341	0.271487029423515	0.244878122525026	0.0986484781182938	1.11850001273324	1.06930735842961	0.157664883035866	0.247043001902494	0.597507961672403
ENSMUSG00000093930	437.003922450535	383.097720788765	445.755328618558	386.261057904175	417.585109674147	375.710390913575	491.190614438685	507.43138689226	439.810186040108	450.079646687863	425.403020945721	447.126113186932	407.568921724959	460.173494698595	-0.176632491743726	0.0270874343901531	0.432944443420439	Hmgcs1	13	120151915	120169796	+	4594	protein_coding	3-hydroxy-3-methylglutaryl-Coenzyme A synthase 1 [Source:MGI Symbol;Acc:MGI:107592]	-	416	365	419	471	490	363	464	551	404	435	373	519	8.54211345108394	7.52892750362165	8.68161812842983	7.45957003702034	8.16651303692878	7.31154003230525	9.63325676855015	10.0250086438115	8.67035593617874	8.77674846027642	8.27373651728223
ENSMUSG00000040842	1551.57402273904	1842.01780817612	1726.63698889718	1806.65203941167	1731.6998833834	2050.36441983414	2087.56011136441	1964.33965198038	1898.58654567809	1839.63588922074	2010.68505610538	2095.20367489522	1784.82419374026	1982.66848820737	-0.151818750105359	0.0270904617939181	0.432944443420439	Szrd1	4	140840312	140867086	-	3327	protein_coding	SUZ RNA binding domain containing 1 [Source:MGI Symbol;Acc:MGI:1098672]	-	1477	1755	1623	2203	2032	1981	1972	2133	1744	1778	1763	2432	41.8784587350227	49.9868260353229	46.4347771691489	48.1776459632585	46.7630116804589	55.0966130967523	56.5327687939757	53.587340311779	51.682109516411	49.5352479741402	53.9987065152817
ENSMUSG00000032011	98.7460786306497	90.2641205146132	91.4915471627589	92.6698504101311	96.3002395779154	99.3614256961522	121.739053147519	119.720653894726	126.282132625378	132.437229370222	88.9582724765851	107.689333619203	94.8055436653701	116.137779188939	-0.293590175454516	0.0271579510923898	0.433657063901921	Thy1	9	43954681	43959876	+	2995	protein_coding	thymus cell antigen 1, theta [Source:MGI Symbol;Acc:MGI:98747]	-	94	86	86	113	113	96	115	130	116	128	78	125	2.96069739972252	2.72102709432694	2.73324946243148	2.74514631020425	2.88877147678549	2.96597601255296	3.6622430224172	3.62802836079316	3.81863118383229	3.96139846149196	2.65388207666108
ENSMUSG00000120059	4.2019607927936	3.14874839004465	1.06385519956696	1.64017434354214	0	3.10504455300476	2.11720092430468	4.60464053441252	7.62047352049692	3.10399756336457	18.2478507644277	5.16908801372176	2.19329721315869	6.81054188678803	-1.65102439909502	0.0272778159626961	0.434837776684798	ENSMUSG00000120059	2	25246420	25248013	+	1594	lncRNA	novel transcript	-	4	3	1	2	0	3	2	5	7	3	16	6	0.236719846022824	0.178346331027163	0.0597158103059603	0.0912904942101656	0	0.174151077430915	0.119670698294032	0.262183788740843	0.43296847428419	0.174448935345952	1.02285838813499
ENSMUSG00000024426	54.6254903063168	49.3303914440328	52.1289047787812	53.3056661651197	58.8028011581961	75.5560841231157	87.8638383586441	75.5161047643654	84.9138477998228	64.1492829762011	70.7104217121574	63.7520855025684	57.2915563292604	74.4842635189599	-0.376665933712718	0.0273708040452178	0.435707121666332	Atat1	17	36208487	36220967	-	4586	protein_coding	alpha tubulin acetyltransferase 1 [Source:MGI Symbol;Acc:MGI:1913869]	-	52	47	49	65	69	73	83	82	78	62	62	74	1.06962683150566	0.97116953248241	1.0170438464364	1.03124815799338	1.1519844342248	1.47292976246665	1.72619632857578	1.49452763448487	1.67689976776219	1.2531210482897	1.37765820953179
ENSMUSG00000002769	5.252450990992	16.7933247469048	10.6385519956696	14.7615690918793	4.26107254769537	28.9804158280444	21.1720092430468	18.4185621376501	17.4182251897072	11.3813243990034	78.6938564215945	24.9839253996552	13.4478975335309	28.6779837984429	-1.09158534666275	0.0274013719455381	0.435707121666332	Gnmt	17	47036590	47040094	-	1206	protein_coding	glycine N-methyltransferase [Source:MGI Symbol;Acc:MGI:1202304]	-	5	16	10	18	5	28	20	20	16	11	69	29	0.391098087230909	1.25719868062929	0.789278620461864	1.08594811769406	0.317434603273182	2.14834463457618	1.58171718972377	1.38613916833467	1.30803458518645	0.845436050955202	5.83022920177314
ENSMUSG00000023051	320.399510450512	341.114408921503	305.326442275719	339.516089113224	260.777639918957	363.290212701556	356.748355745338	342.585255760292	401.707818437623	386.965029566117	348.99014586968	387.681601029132	321.737383896912	370.77970106803	-0.206091123055041	0.0274503398283324	0.43579411158401	Tarbp2	15	102426627	102432111	+	4549	protein_coding	TARBP2, RISC loading complex RNA binding subunit [Source:MGI Symbol;Acc:MGI:103027]	-	305	325	287	414	306	351	337	372	369	374	306	450	6.3248014696041	6.77015584294143	6.00542305279185	6.62168144396523	5.15035375922277	7.1397730575315	7.06577999210722	6.83519880598287	7.99755032551332	7.62063306954652	6.85471393204926
ENSMUSG00000049871	36.767156936944	30.4379011037649	41.4903527831116	55.7659276804329	46.01958351511	20.7002970200317	37.0510161753318	71.8323923368353	41.3682848255547	62.0799512672914	69.5699310393807	57.721482819893	38.5302031732325	56.6038430773812	-0.547450554356004	0.0274958907503364	0.43579411158401	Nlrc3	16	3762871	3794496	-	7069	protein_coding	NLR family, CARD domain containing 3 [Source:MGI Symbol;Acc:MGI:2444070]	-	35	29	39	68	54	20	35	78	38	60	61	67	0.46706041199651	0.388750766165023	0.525151091169944	0.699898093678616	0.584880778145783	0.261797347503068	0.472232865880891	0.92227570580638	0.529995481768324	0.786735331564429	0.87933771141531
ENSMUSG00000018293	1701.79412108141	1924.93484911396	1936.21646321187	1604.91059515599	1735.96095593109	2263.57747914047	2248.46738161157	1786.60052735206	2141.35305925963	2053.81172109289	2261.59300411626	2269.22963802385	1861.2324106058	2126.84255524271	-0.192796958673355	0.0275602977250671	0.435856700752127	Pfn1	11	70542676	70545470	-	2405	protein_coding	profilin 1 [Source:MGI Symbol;Acc:MGI:97549]	-	1620	1834	1820	1957	2037	2187	2124	1940	1967	1985	1983	2634	63.5422997908334	72.2629176354101	72.033406637179	59.2051689163939	64.8496324292865	84.1447317682896	84.2336419341744	67.4234229480777	80.6372728442947	76.5034139762679	84.0217028267321
ENSMUSG00000027048	1.0504901981984	0	0	0	0	0	8.46880369721871	0	0	0	7.98343470943713	1.72302933790725	0.175081699699733	3.02921129076051	-3.59087539852765	0.0276270627760943	0.436001095711394	Abcb11	2	69068626	69172960	-	5146	protein_coding	ATP-binding cassette, sub-family B (MDR/TAP), member 11 [Source:MGI Symbol;Acc:MGI:1351619]	-	1	0	0	0	0	0	8	0	0	0	7	2	0.0183312978313438	0	0	0	0	0	0.148274460225952	0	0	0	0.138615598217185
ENSMUSG00000097504	122.907353189213	112.305359244926	100.002388759295	80.368542833565	100.561312125611	71.4160247191094	208.544291044011	150.111281421848	83.8252087254661	124.159902534583	94.6607258404688	138.703861701534	97.9268301452864	133.334211877985	-0.448691208661968	0.0278020760062771	0.437533672431824	4930516B21Rik	9	119269344	119273896	-	1195	lncRNA	RIKEN cDNA 4930516B21 gene [Source:MGI Symbol;Acc:MGI:1922364]	-	117	107	94	98	118	69	197	163	77	120	83	161	9.2359367873566	8.48490753900442	7.48751309874801	5.96680781655163	7.56041565231798	5.34286761570896	15.7233277560231	11.4010236582801	6.35286127874393	9.30783608172209	7.07773067296208
ENSMUSG00000022476	116.604412000022	119.652438821697	113.832506353665	121.372901422119	114.196744278236	120.061722716184	142.911062390566	128.009006856668	117.573020030524	143.818553769225	165.371147552626	149.903552397931	117.620120931987	141.26439049959	-0.263305444054369	0.0278165878977673	0.437533672431824	Polr3h	15	81772429	81810441	-	4991	protein_coding	polymerase (RNA) III (DNA directed) polypeptide H [Source:MGI Symbol;Acc:MGI:1926179]	-	111	114	107	148	134	116	135	139	108	139	145	174	2.09796580025056	2.16445481125572	2.04067504992266	2.1575358715797	2.05564823191181	2.15061983712589	2.57983746402452	2.32783062857759	2.13345132051899	2.58144345213793	2.96049463095621
ENSMUSG00000060935	146.018137549578	106.007862464836	158.514424735478	173.858480415467	158.511898774268	141.797034587217	207.485690581858	176.818196521441	150.232192261225	204.863839182062	152.825750152082	197.28685919038	147.451306421141	181.585421314841	-0.298832625145903	0.0279425826581254	0.438372504705851	Tmem263	10	84938491	84956482	+	4014	protein_coding	transmembrane protein 263 [Source:MGI Symbol;Acc:MGI:2143652]	-	139	101	149	212	186	137	196	192	138	198	134	229	3.26663362007305	2.38437877573385	3.53334908882098	3.84275213346448	3.54786549416179	3.15817671376917	4.65719958194004	3.99804804068548	3.38959859154537	4.57217882265459	3.4018195732449
ENSMUSG00000006699	2597.86226014465	2714.22111221849	2667.08498531438	2580.81432956356	2579.65332037478	2317.39825139255	2858.22124781131	2929.47230799325	3220.19438194713	2513.20336047085	2871.75551405181	2688.78728180427	2576.1723765014	2846.93901567977	-0.144004359094047	0.0279962881414705	0.438372504705851	Cdc42	4	137047007	137085031	-	2966	protein_coding	cell division cycle 42 [Source:MGI Symbol;Acc:MGI:106211]	-	2473	2586	2507	3147	3027	2239	2700	3181	2958	2429	2518	3121	78.6531218533228	82.6206515605498	80.4564440595569	77.1986091259861	78.1398988667669	69.8515704893575	86.8237948951205	89.6430594324671	98.3271780469425	75.9087349454681	86.5104208022228
ENSMUSG00000021294	156.523039531562	137.495346365283	130.854189546737	100.050634956071	158.511898774268	115.921663312178	203.251288733249	204.446039727916	163.295861153505	130.367897661312	153.966240824859	149.042037728977	133.226128747683	167.39489430497	-0.331047878389872	0.028038674557056	0.438477637292755	Kif26a	12	112112642	112148181	+	6918	protein_coding	kinesin family member 26A [Source:MGI Symbol;Acc:MGI:2447072]	-	149	131	123	122	186	112	192	222	150	126	135	173	2.03174269114978	1.79441123480322	1.69239681992009	1.28310782220747	2.05856202566716	1.49806512246249	2.64707848160537	2.68223338982783	2.13775166648804	1.68820574205562	1.98855247671624
ENSMUSG00000016344	334.055883027091	351.610236888319	381.92401664454	273.909115371538	305.945008924528	387.095554274593	369.451561291166	351.794536829117	448.519298634962	402.485017382939	440.229399691819	368.728278312152	339.089969188435	396.868015357026	-0.228222560643602	0.0281894320796824	0.439290582890436	Ppdpf	2	180829040	180830564	+	1336	protein_coding	pancreatic progenitor cell differentiation and proliferation factor [Source:MGI Symbol;Acc:MGI:1913746]	-	318	335	359	334	359	374	349	382	412	389	386	428	22.4534798260107	23.7612667927133	25.5779442996591	18.1896309713755	20.5740391056193	25.9034954383495	24.9152423222903	23.8990728195523	30.4044610970603	26.9884864132293	29.4418226274909
ENSMUSG00000030244	0	2.0991655933631	0	4.10043585885536	0.852214509539075	4.14005940400634	5.29300231076169	17.4976340307676	6.53183444614022	0	13.6858880733208	1.72302933790725	1.86531256096065	7.45523136648292	-1.97792071067911	0.0282148396035795	0.439290582890436	Gys2	6	142368339	142418835	-	2657	protein_coding	glycogen synthase 2 [Source:MGI Symbol;Acc:MGI:2385254]	-	0	2	0	5	1	4	5	19	6	0	12	2	0	0.0713295826514359	0	0.13691856207283	0.0288164193863348	0.139303383477545	0.179483527550515	0.597704044095233	0.222641566108608	0	0.460228529550386
ENSMUSG00000086610	47.272058918928	24.1404043236756	28.724090388308	47.5650559627222	27.2708643052504	45.5406534440697	48.6956212590076	45.1254772372427	30.4818940819877	57.941287849472	68.4294403666039	74.9517761989655	36.7521878904923	54.2709161655466	-0.56308423679717	0.0282298362750903	0.439290582890436	Gm15408	5	148943737	148950256	+	3026	lncRNA	predicted gene 15408 [Source:MGI Symbol;Acc:MGI:3705101]	-	45	23	27	58	32	44	46	49	28	56	60	87	1.402834976472	0.720261421912078	0.849322222058137	1.39457844856547	0.80967853334558	1.34547917676742	1.44989000028282	1.35347832144034	0.912295767361533	1.71535688089018	2.02053404331688
ENSMUSG00000097032	1.0504901981984	8.39666237345239	6.38313119740178	4.10043585885536	0.852214509539075	5.17507425500793	7.41020323506637	2.76278432064751	17.4182251897072	8.27732683563886	14.8263787460975	12.0612053653508	4.32633473207582	10.4593539487514	-1.28455904917961	0.0283228245915511	0.44037574065254	4930539J05Rik	3	135141970	135144467	-	1709	lncRNA	RIKEN cDNA 4930539J05 gene [Source:MGI Symbol;Acc:MGI:1922477]	-	1	8	6	5	1	5	7	3	16	8	13	14	0.0551976937624899	0.443587363615834	0.334184909166884	0.212868706511124	0.0448011856696849	0.27072051631059	0.390662858854537	0.146724737010967	0.923048396568084	0.433893665600074	0.775148899902471
ENSMUSG00000078300	36.767156936944	39.8841462738989	47.8734839805134	46.7449687909511	38.3496529292584	41.4005940400634	71.984831426359	45.1254772372427	59.8751490896187	48.6292951593783	51.322080274953	58.5829974888466	41.8366671586049	55.9199717793997	-0.416240353484293	0.0286078124605141	0.443350861192484	Gm2606	15	12574975	12575976	+	1002	processed_pseudogene	predicted pseudogene 2606 [Source:MGI Symbol;Acc:MGI:3780774]	-	35	38	45	57	45	40	68	49	55	47	45	68	3.29505993253826	3.59374383332579	4.27486534256141	4.13895794558245	3.43855806779153	3.69390309281276	6.47272770932471	4.0874504996791	5.41179728264827	4.34775959356222	4.57644911308149
ENSMUSG00000050088	158.624019927959	167.933247469048	145.748162340674	145.975516575251	184.07833406044	161.462316756247	170.434674406526	189.711190017796	219.905093020054	172.789197693961	201.866849081482	186.087168493983	160.636932854936	190.132362118967	-0.241250891671889	0.0286603412382946	0.443801751734115	1600012H06Rik	17	15163446	15179832	+	3294	protein_coding	RIKEN cDNA 1600012H06 gene [Source:MGI Symbol;Acc:MGI:1915162]	-	151	160	137	178	216	156	161	206	202	167	177	216	4.32430529892361	4.60285855749521	3.95890079629478	3.93169922635682	5.02067057767157	4.38222055436967	4.66174407801922	5.22718382550687	6.04608609150047	4.69924688233371	5.47562272145622
ENSMUSG00000099364	5.252450990992	11.545410763497	14.8939727939375	10.6611332330239	6.8177160763126	4.14005940400634	15.8790069322851	14.7348497101201	16.3295861153505	21.727982943552	11.4049067277673	15.5072640411653	8.88512387696157	15.9305994117067	-0.84515243849403	0.0287421854632134	0.444289211926716	5730419F03Rik	1	78571663	78588078	-	2091	lncRNA	RIKEN cDNA 5730419F03 gene [Source:MGI Symbol;Acc:MGI:1917787]	-	5	11	14	13	8	4	15	16	15	21	10	18	0.225568767671198	0.498505430931018	0.637311345187858	0.4523485463948	0.292932477511206	0.177010564275389	0.684200477333884	0.639572964901623	0.707267624522443	0.930894892678207	0.487337479282391
ENSMUSG00000047143	0	0	2.12771039913393	0	0	1.03501485100159	3.17580138645702	0.920928106882504	0	0	12.5453974005441	7.75363202058264	0.527120875022585	4.0659598190777	-3.02132998948615	0.0287733912484344	0.444289211926716	Dmrta2	4	109835250	109840884	+	2922	protein_coding	doublesex and mab-3 related transcription factor like family A2 [Source:MGI Symbol;Acc:MGI:2653629]	DM	0	0	2	0	0	1	3	1	0	0	11	9	0	0	0.0651519518327863	0	0	0.0316674443788363	0.097923559076328	0.0286051306812392	0	0	0.383615652326293
ENSMUSG00000001995	154.422059135165	137.495346365283	157.450569535911	177.958916274323	132.093248978557	139.727004885214	159.848669785003	210.892536476094	229.702844689264	158.303875731593	157.387712843189	180.918080480262	149.857857529075	182.842286667567	-0.286880596870443	0.0287893302388916	0.444289211926716	Sipa1l2	8	126144802	126296547	-	9617	protein_coding	signal-induced proliferation-associated 1 like 2 [Source:MGI Symbol;Acc:MGI:2676970]	-	147	131	148	217	155	135	151	229	211	153	138	210	1.44191850058168	1.29081178354671	1.46487223051884	1.64173855497077	1.23402413205482	1.29893488448784	1.49755740122615	1.99030674158085	2.16316372539549	1.47464404180241	1.46225567585285
ENSMUSG00000028542	102.948039423443	136.445763568601	118.087927151933	113.172029704408	115.048958787775	132.481900928203	122.797653609671	153.794993849378	152.409470409938	131.402563515767	164.230656879849	141.288405708395	119.697436594061	144.3206239955	-0.270826560276341	0.0289708738276333	0.446057242721723	Slc6a9	4	117691703	117732395	+	5141	protein_coding	solute carrier family 6 (neurotransmitter transporter, glycine), member 9 [Source:MGI Symbol;Acc:MGI:95760]	-	98	130	111	138	135	128	116	167	140	127	144	164	1.79821438372483	2.39622166345385	2.05519493885913	1.95305899556492	2.01056322734514	2.30385739677005	2.15207068638005	2.71514492103618	2.6848930091772	2.28976811084509	2.85429419104931
ENSMUSG00000004665	119.755882594618	52.4791398340775	76.5975743688214	81.1886300053361	111.640100749619	42.435608891065	142.911062390566	126.167150642903	102.33207298953	93.1199269009371	106.065632568236	105.104789612342	80.6828227405894	112.616772517419	-0.478298651256087	0.0291170416635123	0.446456031995337	Cnn2	10	79824418	79831896	+	2460	protein_coding	calponin 2 [Source:MGI Symbol;Acc:MGI:105093]	-	114	50	72	99	131	41	135	137	94	90	93	122	4.37152271746783	1.9260437104153	2.78596102324978	2.92808693685557	4.0772539213591	1.54220454124933	5.23413365160421	4.65489198517462	3.76737887995621	3.39111710904204	3.8524027737273
ENSMUSG00000021670	66.1808824864992	70.3220473776638	61.7036015748839	50.8454046498064	49.4284415532663	71.4160247191094	84.6880369721871	86.5672420469554	83.8252087254661	77.5999390841143	62.7269870027203	75.8132908679191	61.6494003935382	78.5367841165604	-0.358682143713652	0.0291259316799428	0.446456031995337	Hmgcr	13	96785475	96807444	-	7275	protein_coding	3-hydroxy-3-methylglutaryl-Coenzyme A reductase [Source:MGI Symbol;Acc:MGI:96159]	-	63	67	58	62	58	69	80	94	77	75	55	88	0.816903105749278	0.872716218146114	0.758879188234591	0.620072643422835	0.610416924529279	0.877625677082091	1.04882525405189	1.07998818336146	1.04352841623354	0.955572518699132	0.770395145084143
ENSMUSG00000024732	297.288726090147	328.519415361325	300.007166277884	294.411294665815	290.605147752824	332.239767171509	416.029981625869	390.473517318182	434.366990668324	300.053097791909	334.163767123583	298.084075457955	307.178586219917	362.19523833097	-0.237429098134957	0.0291284412430479	0.446456031995337	Ccdc86	19	10918845	10926630	-	5774	protein_coding	coiled-coil domain containing 86 [Source:MGI Symbol;Acc:MGI:1277220]	-	283	313	282	359	341	321	393	424	399	290	293	346	4.62351905007741	5.13687265724132	4.64889755091992	4.52378075422501	4.52177730715909	5.14424306623866	6.49175195537842	6.13780695265782	6.81306713483079	4.65539573103682	5.17100176774485
ENSMUSG00000009406	134.462745369395	119.652438821697	135.109610345004	116.452378391492	162.772971321963	108.676559355166	182.079279490202	170.371699773263	137.168523368945	171.754531839506	224.676662537016	110.273877626064	129.521117267453	166.054095772499	-0.353926651516075	0.0292258566126848	0.446456031995337	Elk1	X	20799634	20816847	-	5381	protein_coding	ELK1, member of ETS oncogene family [Source:MGI Symbol;Acc:MGI:101833]	ETS	128	114	127	142	191	105	172	185	126	166	197	128	2.24393345213384	2.0075811118709	2.24656182990485	1.92003538222287	2.71770269933337	1.80559163907652	3.04867831349918	2.87364346633664	2.30862877981081	2.85943666532121	3.7306721023668
ENSMUSG00000082329	1.0504901981984	5.24791398340775	0	0	0.852214509539075	0	0	6.44649674817753	2.17727814871341	19.6586512346423	4.56196269110693	2.58454400686088	1.19176978185754	5.90482213825017	-2.3395086554559	0.0292524027986363	0.446456031995337	Gm14287	2	157370789	157370905	-	117	processed_pseudogene	predicted gene 14287 [Source:MGI Symbol;Acc:MGI:3650189]	-	1	5	0	0	1	0	0	7	2	19	4	3	0.806263749060643	4.04963036548857	0	0	0.654403643670867	0	0	5.00076361499201	1.68535225399023	15.0523089911325	3.48383818522899
ENSMUSG00000013236	782.615197657809	759.897944797442	842.573318057035	709.375403581977	734.608907222682	707.950158085084	1063.8934644631	855.542211293847	790.351967982966	736.682088371858	914.673519566939	824.469538188621	756.170154900338	864.268798311222	-0.192998892540424	0.0292566490039389	0.446456031995337	Ptprs	17	56719426	56783483	-	14990	protein_coding	protein tyrosine phosphatase, receptor type, S [Source:MGI Symbol;Acc:MGI:97815]	-	745	724	792	865	862	684	1005	929	726	712	802	957	4.6883241952549	4.57686576383997	5.02922650361168	4.19854057111136	4.40288359431498	4.22228648251316	6.39455865730788	5.18010101595661	4.77508976512469	4.40264579262421	5.45200921068674
ENSMUSG00000026520	165.977451315347	143.792843145372	140.428886342839	183.69952647672	143.172037602565	141.797034587217	164.083071633612	168.529843559498	194.86639430985	197.621178200878	175.635563607617	192.117771176659	153.144629911677	182.142303748019	-0.247612966093032	0.0292684238429848	0.446456031995337	Pycr2	1	180731858	180735653	+	2958	protein_coding	pyrroline-5-carboxylate reductase family, member 2 [Source:MGI Symbol;Acc:MGI:1277956]	-	158	137	132	224	168	137	155	183	179	191	154	223	5.0387395757725	4.38887931902747	4.24769581300085	5.50977327598122	4.34853212305428	4.28563939454681	4.99780923385843	5.17103012463025	5.96624953605771	5.98508859159527	5.3052566279121
ENSMUSG00000029207	446.45833423432	535.28722630759	435.116776622888	446.947508615234	393.723103407052	303.259351343464	526.124429689712	640.965962390223	434.366990668324	453.183644251227	578.228771097803	468.663979910773	426.798716755092	516.922296334677	-0.276743657994887	0.0295213391284241	0.449056321617748	Apbb2	5	66456046	66776127	-	10966	protein_coding	amyloid beta (A4) precursor protein-binding, family B, member 2 [Source:MGI Symbol;Acc:MGI:108405]	-	425	510	409	545	462	293	497	696	399	438	507	544	3.65597892778045	4.40710275230172	3.55019913056079	3.61603096093367	3.22570988099444	2.47236511354762	4.32269201445839	5.30499703884773	3.58732898381479	3.70221174808055	4.71133041468171
ENSMUSG00000019852	1.0504901981984	2.0991655933631	3.19156559870089	3.28034868708429	1.70442901907815	0	10.5860046215234	14.7348497101201	2.17727814871341	3.10399756336457	6.84294403666039	0.861514668953626	1.8876665160708	6.38443145822257	-1.74311064238271	0.0295498056753264	0.449128587383092	Arfgef3	10	18457587	18619697	-	14579	protein_coding	ARFGEF family member 3 [Source:MGI Symbol;Acc:MGI:106387]	-	1	2	3	4	2	0	10	16	2	3	6	1	0.0064704615296039	0.0129997051310011	0.019587146229721	0.019962555425064	0.0105034949323673	0	0.0654211856371106	0.0917310562870768	0.013525359333072	0.0190734345936928	0.0419379656703263
ENSMUSG00000020828	351.914216396464	263.445281967069	287.24090388308	232.084669611213	305.945008924528	296.014247386453	394.857972382822	348.110824401587	284.134798407099	289.70643924736	445.931853055702	337.713750229822	289.440721361468	350.075939620732	-0.274778671061793	0.0297380492991031	0.450572846089918	Pld2	11	70430890	70448936	+	6252	protein_coding	phospholipase D2 [Source:MGI Symbol;Acc:MGI:892877]	-	335	251	270	283	359	286	373	378	261	280	391	392	5.05462374351118	3.80439843068787	4.11076302614831	3.29345205687733	4.39649971930701	4.23292225333308	5.69031107798274	5.05355478559174	4.11593104447374	4.15120755084268	6.37296646911671
ENSMUSG00000024999	119.755882594618	149.04075712878	172.344542329848	127.113511624516	146.580895640721	134.551930630206	169.376073944374	171.292627880146	194.86639430985	144.85321962368	158.528203515966	180.056565811308	141.564586658115	169.828847514221	-0.264949900815846	0.0297453933918054	0.450572846089918	Noc3l	19	38776572	38807681	-	3977	protein_coding	NOC3 like DNA replication regulator [Source:MGI Symbol;Acc:MGI:1932610]	-	114	142	162	155	172	130	160	186	179	140	139	209	2.70403467059866	3.38348297169862	3.8773684344198	2.8356980644337	3.31134496485605	3.02469082769544	3.83716556360446	3.90914249037164	4.43755748746761	3.26293055165557	3.5615828769411
ENSMUSG00000026942	206.946569045085	227.759466879896	184.046949525085	217.323100519334	226.689059537394	255.648668197392	292.173727554045	275.357503957869	240.589235432831	229.695819688978	278.279724157523	232.608960617479	219.735635617364	258.117495234788	-0.230690275321951	0.0298351646951504	0.450572846089918	Traf2	2	25407994	25436952	-	5101	protein_coding	TNF receptor-associated factor 2 [Source:MGI Symbol;Acc:MGI:101835]	-	197	217	173	265	266	247	276	299	221	222	244	270	3.6431235350125	4.03121212897037	3.22825941611297	3.77984881977221	3.99261913317481	4.48058641468634	5.16059651933636	4.89936745017127	4.2715304088831	4.03397345964852	4.87436838423433
ENSMUSG00000003355	1.0504901981984	1.04958279668155	2.12771039913393	5.7406102023975	0	1.03501485100159	5.29300231076169	5.52556864129503	1.0886390743567	10.3466585445486	13.6858880733208	2.58454400686088	1.83390140790216	6.42071677519061	-1.76509104716322	0.0299859292262673	0.452128604846378	Fkbp11	15	98622247	98626079	-	2706	protein_coding	FK506 binding protein 11 [Source:MGI Symbol;Acc:MGI:1913370]	-	1	1	2	7	0	1	5	6	1	10	12	3	0.0348606277310034	0.0350189765530054	0.0703525510921661	0.188214954618815	0	0.0341952226441092	0.17623345628297	0.185330802329447	0.0364349988390349	0.342537081721418	0.451894753516399
ENSMUSG00000001507	172.280392504538	173.181161452456	142.556596741973	175.498654759009	174.70397445551	153.182197948235	200.075487346792	214.576248903624	222.082371168767	164.511870858322	221.255190518686	164.549301770143	165.23382964362	197.841745094389	-0.255484733351951	0.0300494704019874	0.45242697352169	Itga3	11	94935300	94967627	-	5710	protein_coding	integrin alpha 3 [Source:MGI Symbol;Acc:MGI:96602]	-	164	165	134	214	205	148	189	233	204	159	194	191	2.70938508178207	2.73828771298623	2.23381054607914	2.72685185840585	2.7488391231954	2.39838464558564	3.15698008688703	3.41070345029515	3.52241572664088	2.58104990471046	3.46217859581119
ENSMUSG00000073535	58.8274510991104	33.5866494938096	42.5542079826785	78.7283684900229	20.4531482289378	39.3305643380602	95.2740415937105	58.0184707335978	44.6342020486248	122.090570825673	38.7766828744089	79.2593495437336	45.5800649387699	73.0088862699581	-0.678849406950344	0.0300534973434516	0.45242697352169	Gm5532	1	155395918	155402965	-	2283	lncRNA	predicted gene 5532 [Source:MGI Symbol;Acc:MGI:3646828]	-	56	32	40	96	24	38	90	63	41	118	34	92	2.31390279625288	1.32823618820755	1.66775298515463	3.05949114893044	0.804890683936835	1.54017799126083	3.7599558425891	2.30652829022628	1.77061646132088	4.79083795402114	1.51759836846703
ENSMUSG00000033545	976.955884324513	1024.39280956119	985.129914799008	1004.60678541956	844.544578953223	1035.01485100159	1162.34330744327	1020.38834242581	967.800137103109	1135.02844233698	1207.77962247056	1067.41667483354	978.440804009847	1093.45942110221	-0.160464741436191	0.0301375934766411	0.453332601477863	Znrf1	8	112262729	112352662	+	7018	protein_coding	zinc and ring finger 1 [Source:MGI Symbol;Acc:MGI:2177308]	-	930	976	926	1225	991	1000	1098	1108	889	1097	1059	1239	12.5006495490579	13.1785520289504	12.5595844267955	12.7000843202821	10.8116470892998	13.1849918032145	14.9222778713732	13.196250295019	12.4892094609779	14.4886742864428	15.3768168518249
ENSMUSG00000020079	264.723529945997	285.486520697381	273.41078628871	280.469812745707	247.994422275871	271.173890962415	319.697339570006	314.036484446934	321.148526935227	331.093073425554	266.874817429755	293.776502113187	270.543160486013	307.771123986777	-0.186989607861047	0.0305230724135384	0.457676916363888	Supv3l1	10	62264988	62285517	-	2969	protein_coding	suppressor of var1, 3-like 1 (S. cerevisiae) [Source:MGI Symbol;Acc:MGI:2441711]	-	252	272	257	342	291	262	302	341	295	320	234	341	8.00669598427214	8.68140362083586	8.23949458346888	8.38107617677389	7.50437213070462	8.16552892840667	9.70158944263514	9.59993581039005	9.79621641065557	9.990222627289	8.03136761832261
ENSMUSG00000085499	0	0	0	0	0	0	0	1.84185621376501	3.26591722307011	4.13866341781943	3.4214720183302	0	0	2.11131814549746	-3.55072558945453	0.0305717271905424	1	Gm15713	16	43230881	43240559	-	1546	lncRNA	predicted gene 15713 [Source:MGI Symbol;Acc:MGI:3783155]	-	0	0	0	0	0	0	0	2	3	4	3	0	0	0	0	0	0	0	0	0.108129614295706	0.19131909480937	0.239820269893443	0.197740492078812
ENSMUSG00000031659	89.2916668468641	44.0824774606251	63.8313119740178	50.0253174780354	76.6993058585167	57.9608316560888	127.032055458281	139.981072246141	116.484380956167	71.3919439573852	43.3386455655158	65.4751148404756	63.648485212358	93.9505355039942	-0.563187157071772	0.0308177366531824	0.460945780349671	Adcy7	8	88999031	89056590	+	6733	protein_coding	adenylate cyclase 7 [Source:MGI Symbol;Acc:MGI:102891]	-	85	42	60	61	90	56	120	152	107	69	38	76	1.19089454691937	0.591114915075326	0.84824299683084	0.659181636271443	1.02344725499097	0.769613435110313	1.69988201170967	1.88694447665057	1.56682941242416	0.949895569234114	0.575120472728653
[truncated: 231 more rows]
[truncated: 1 more columns]
